# Supplementary material for: Mapping Genetic Variants Associated with Beta-Adrenergic Responses in Inbred Mice
Source: PLOS journal article supplement (doi:10.1371/journal.pone.0041032), 2012-07-31

AW/BWS - ctr

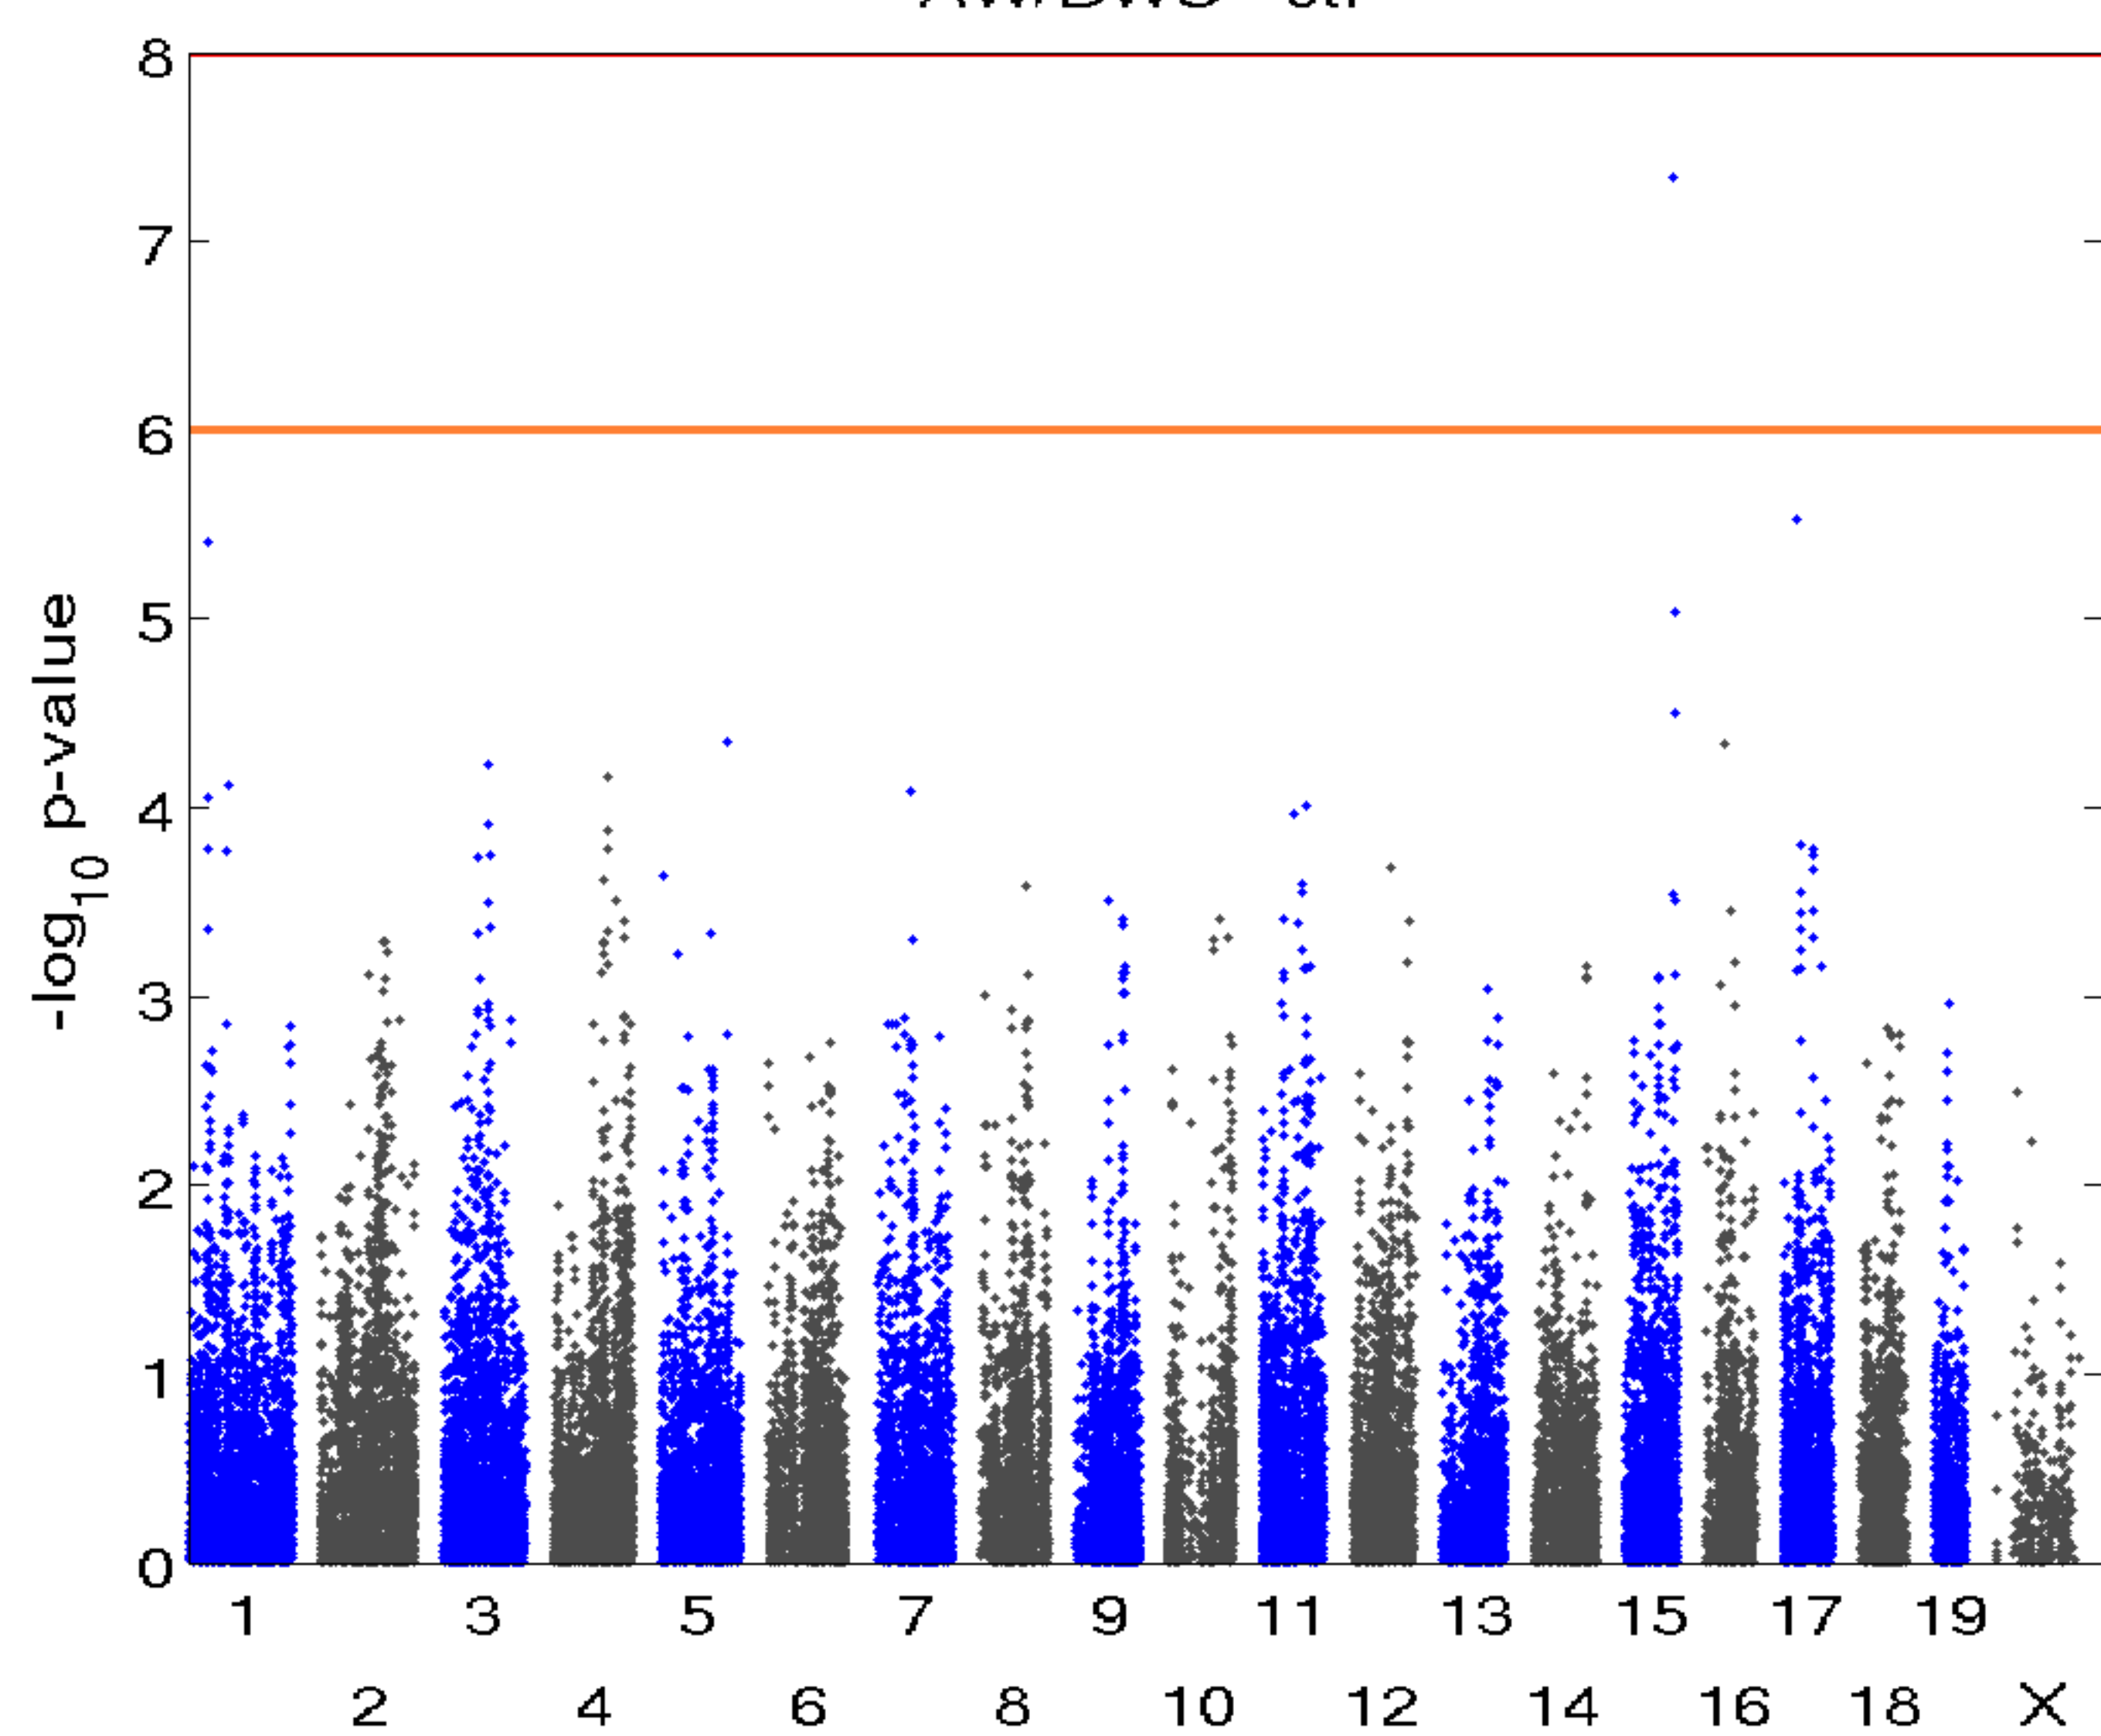

AW/BWS - ctr

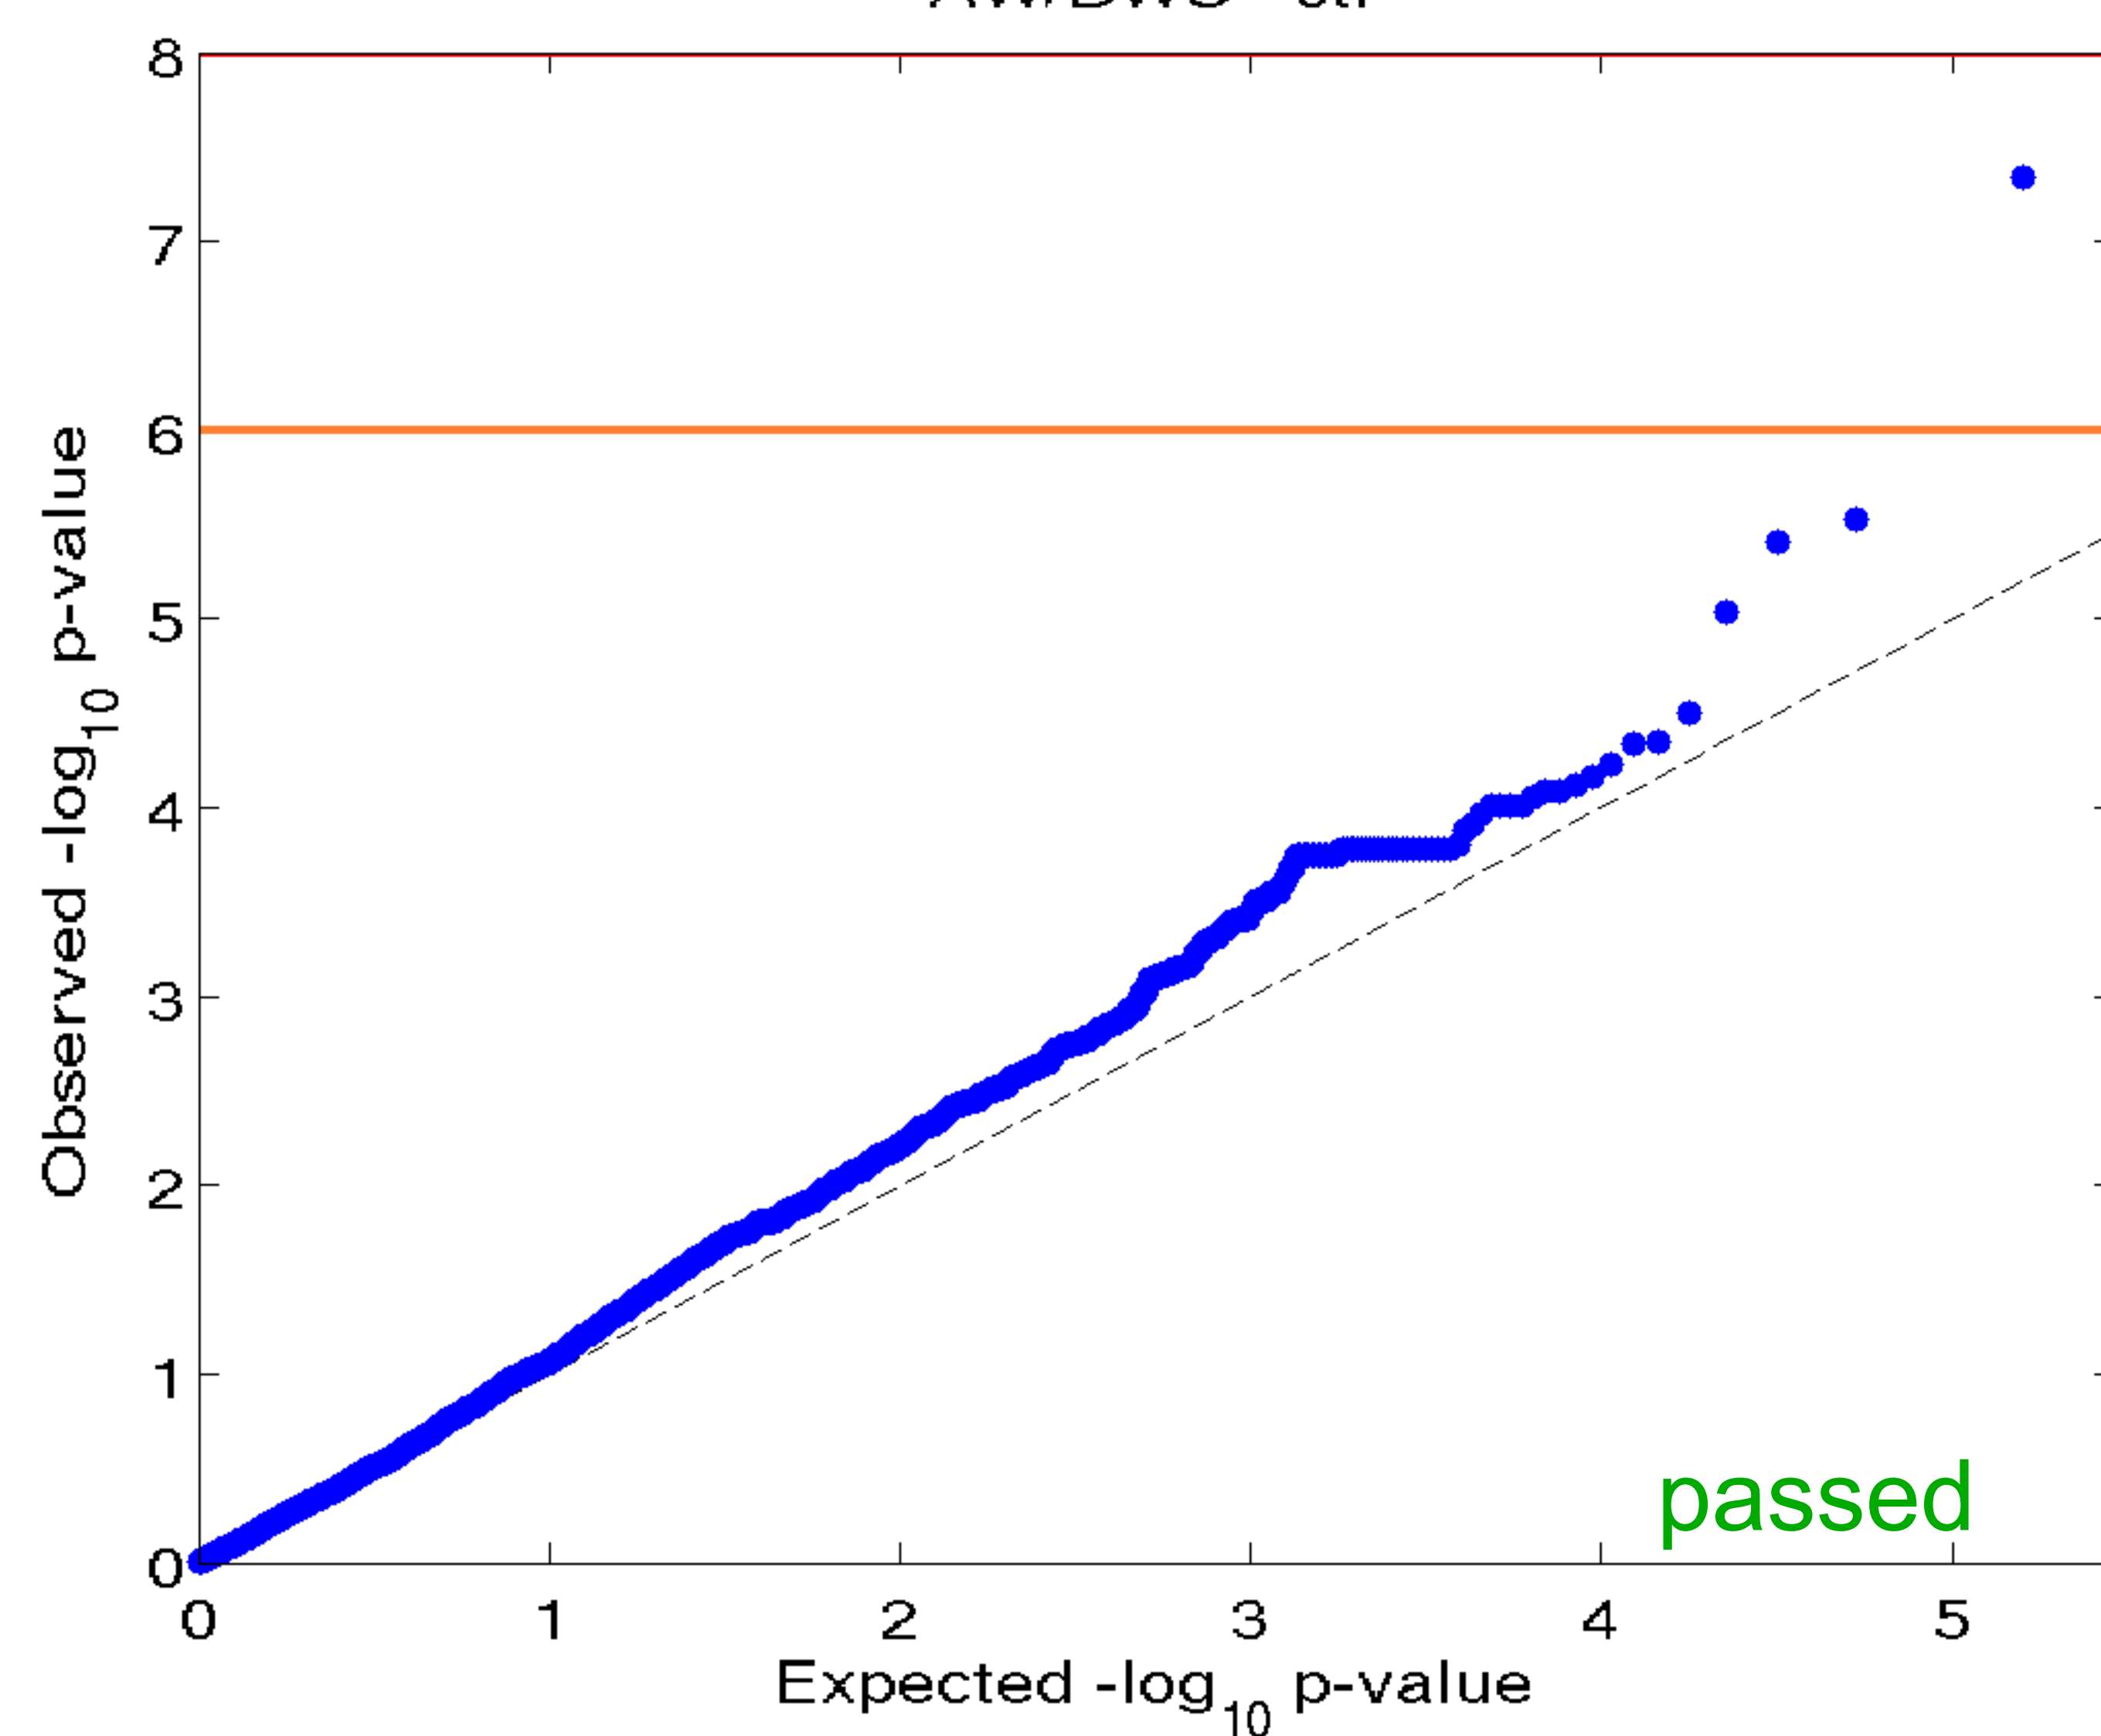

AWI - ctr

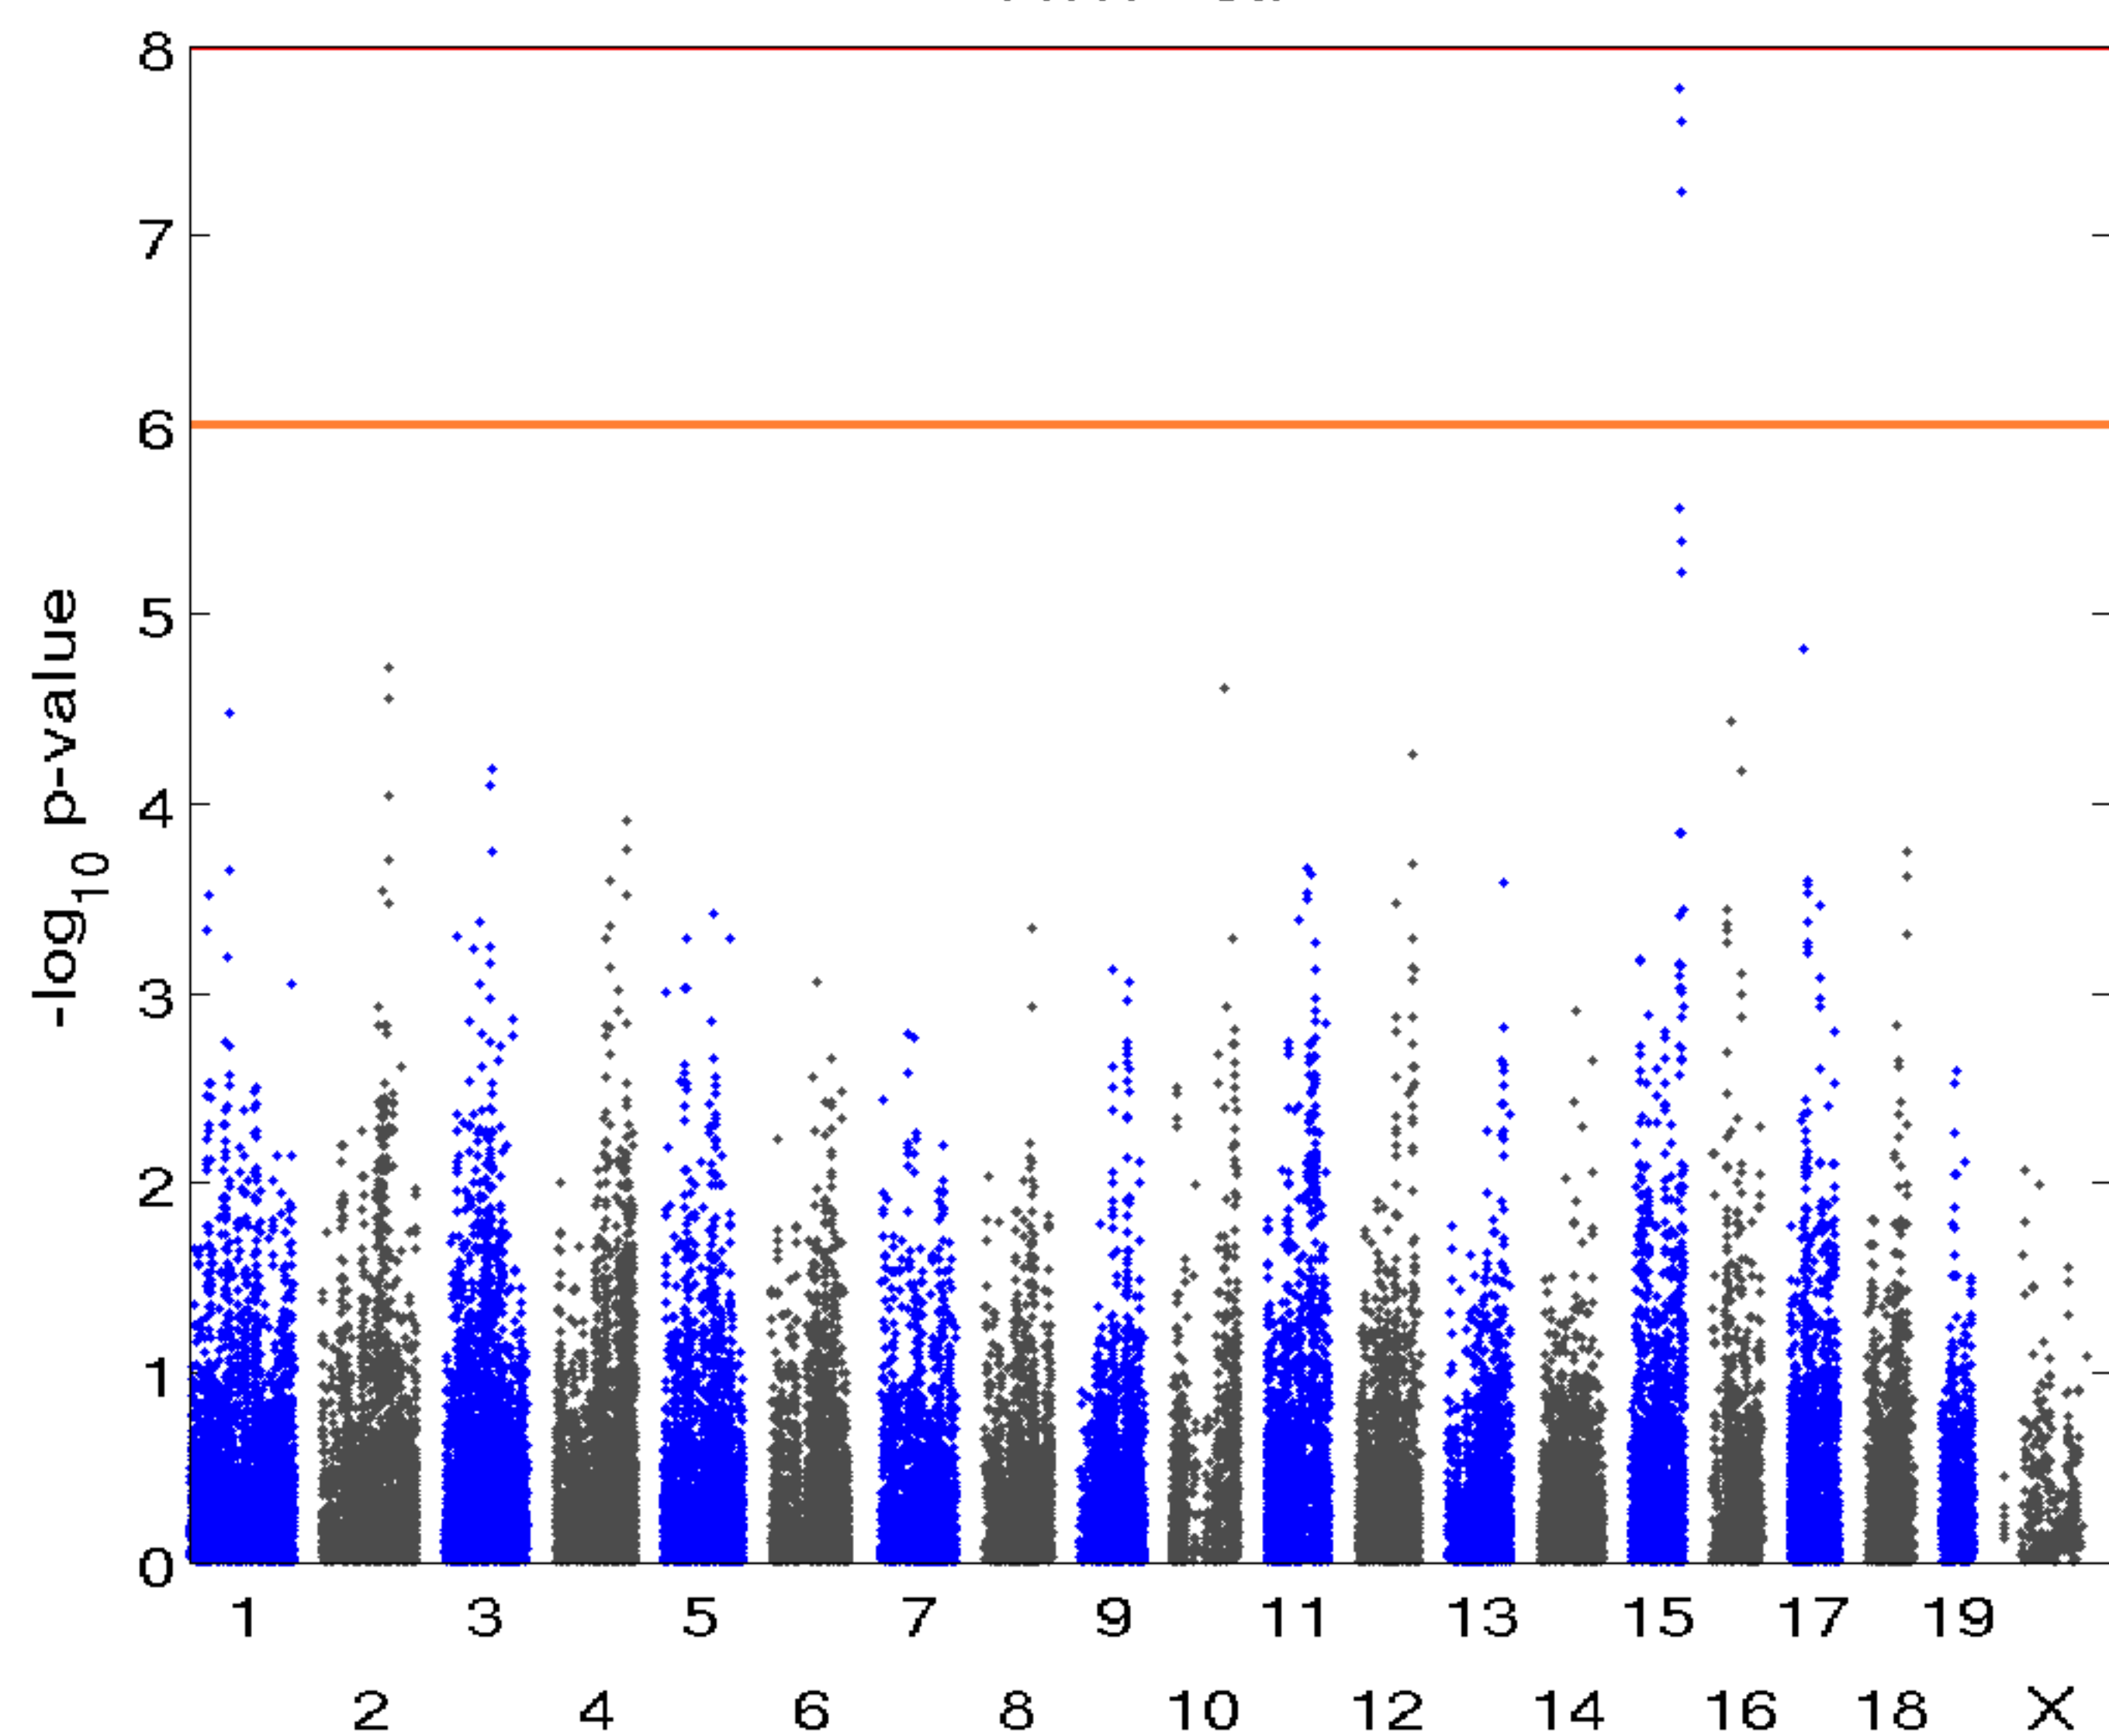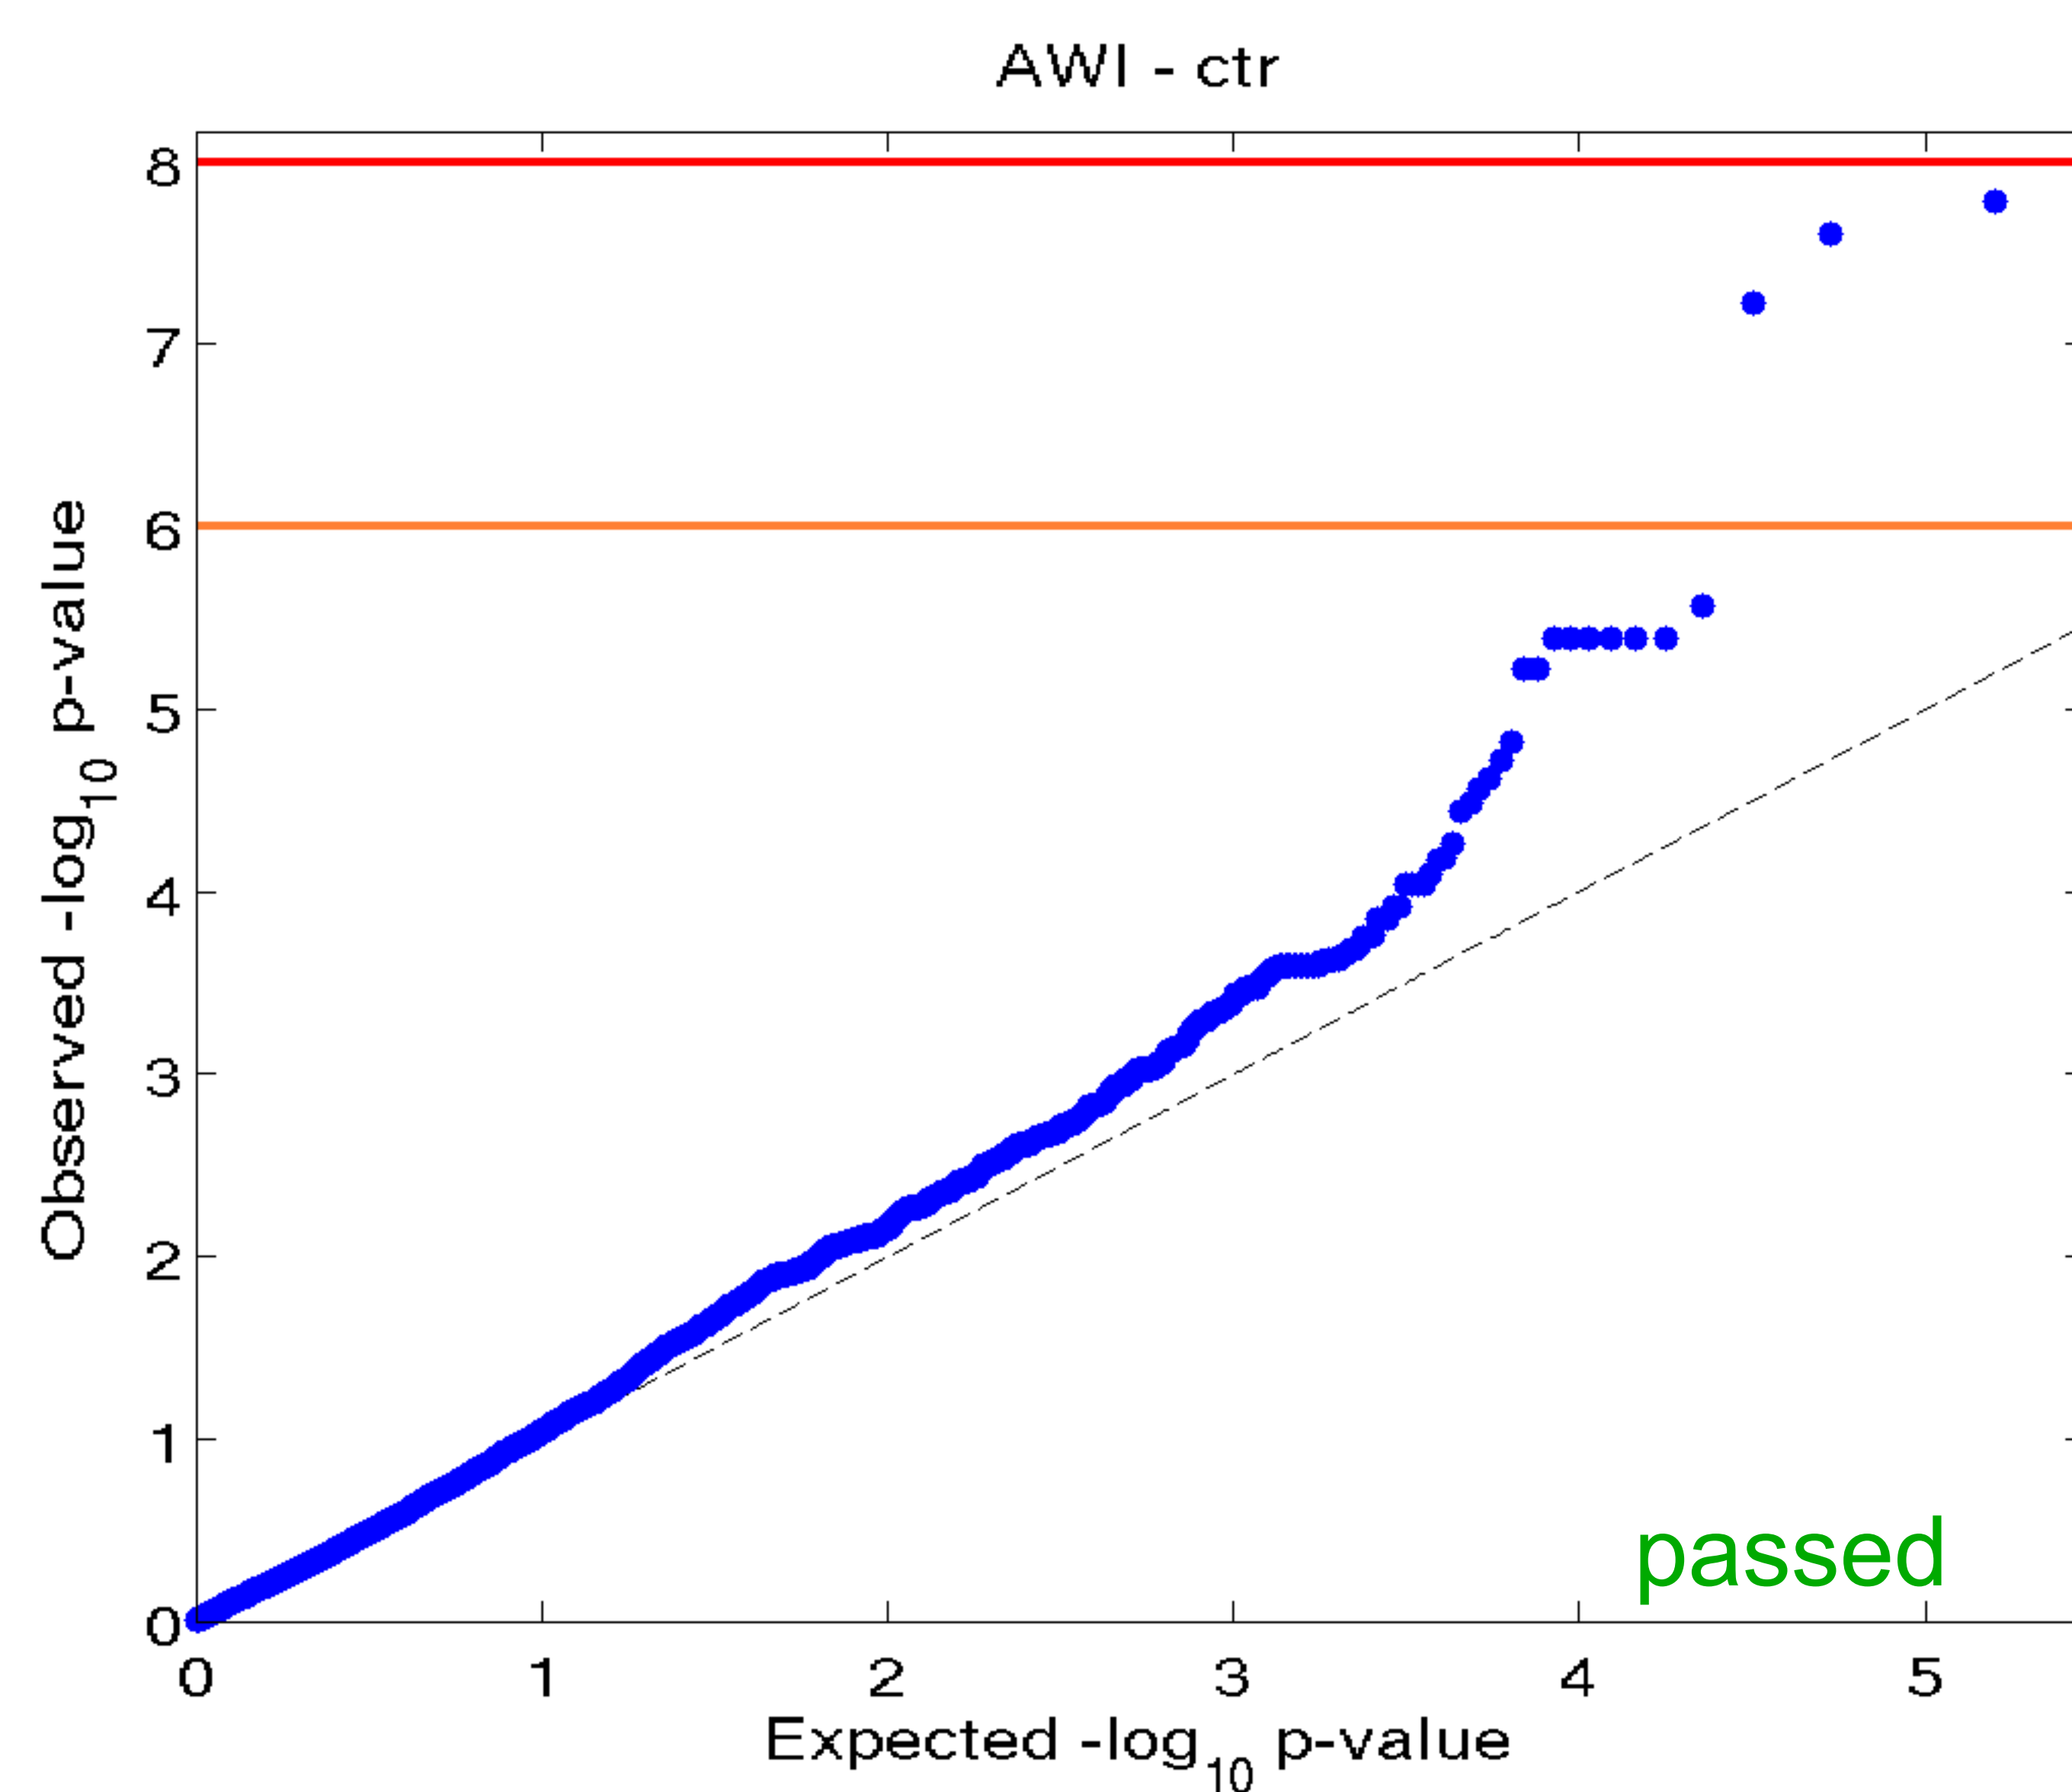

AW - ctr

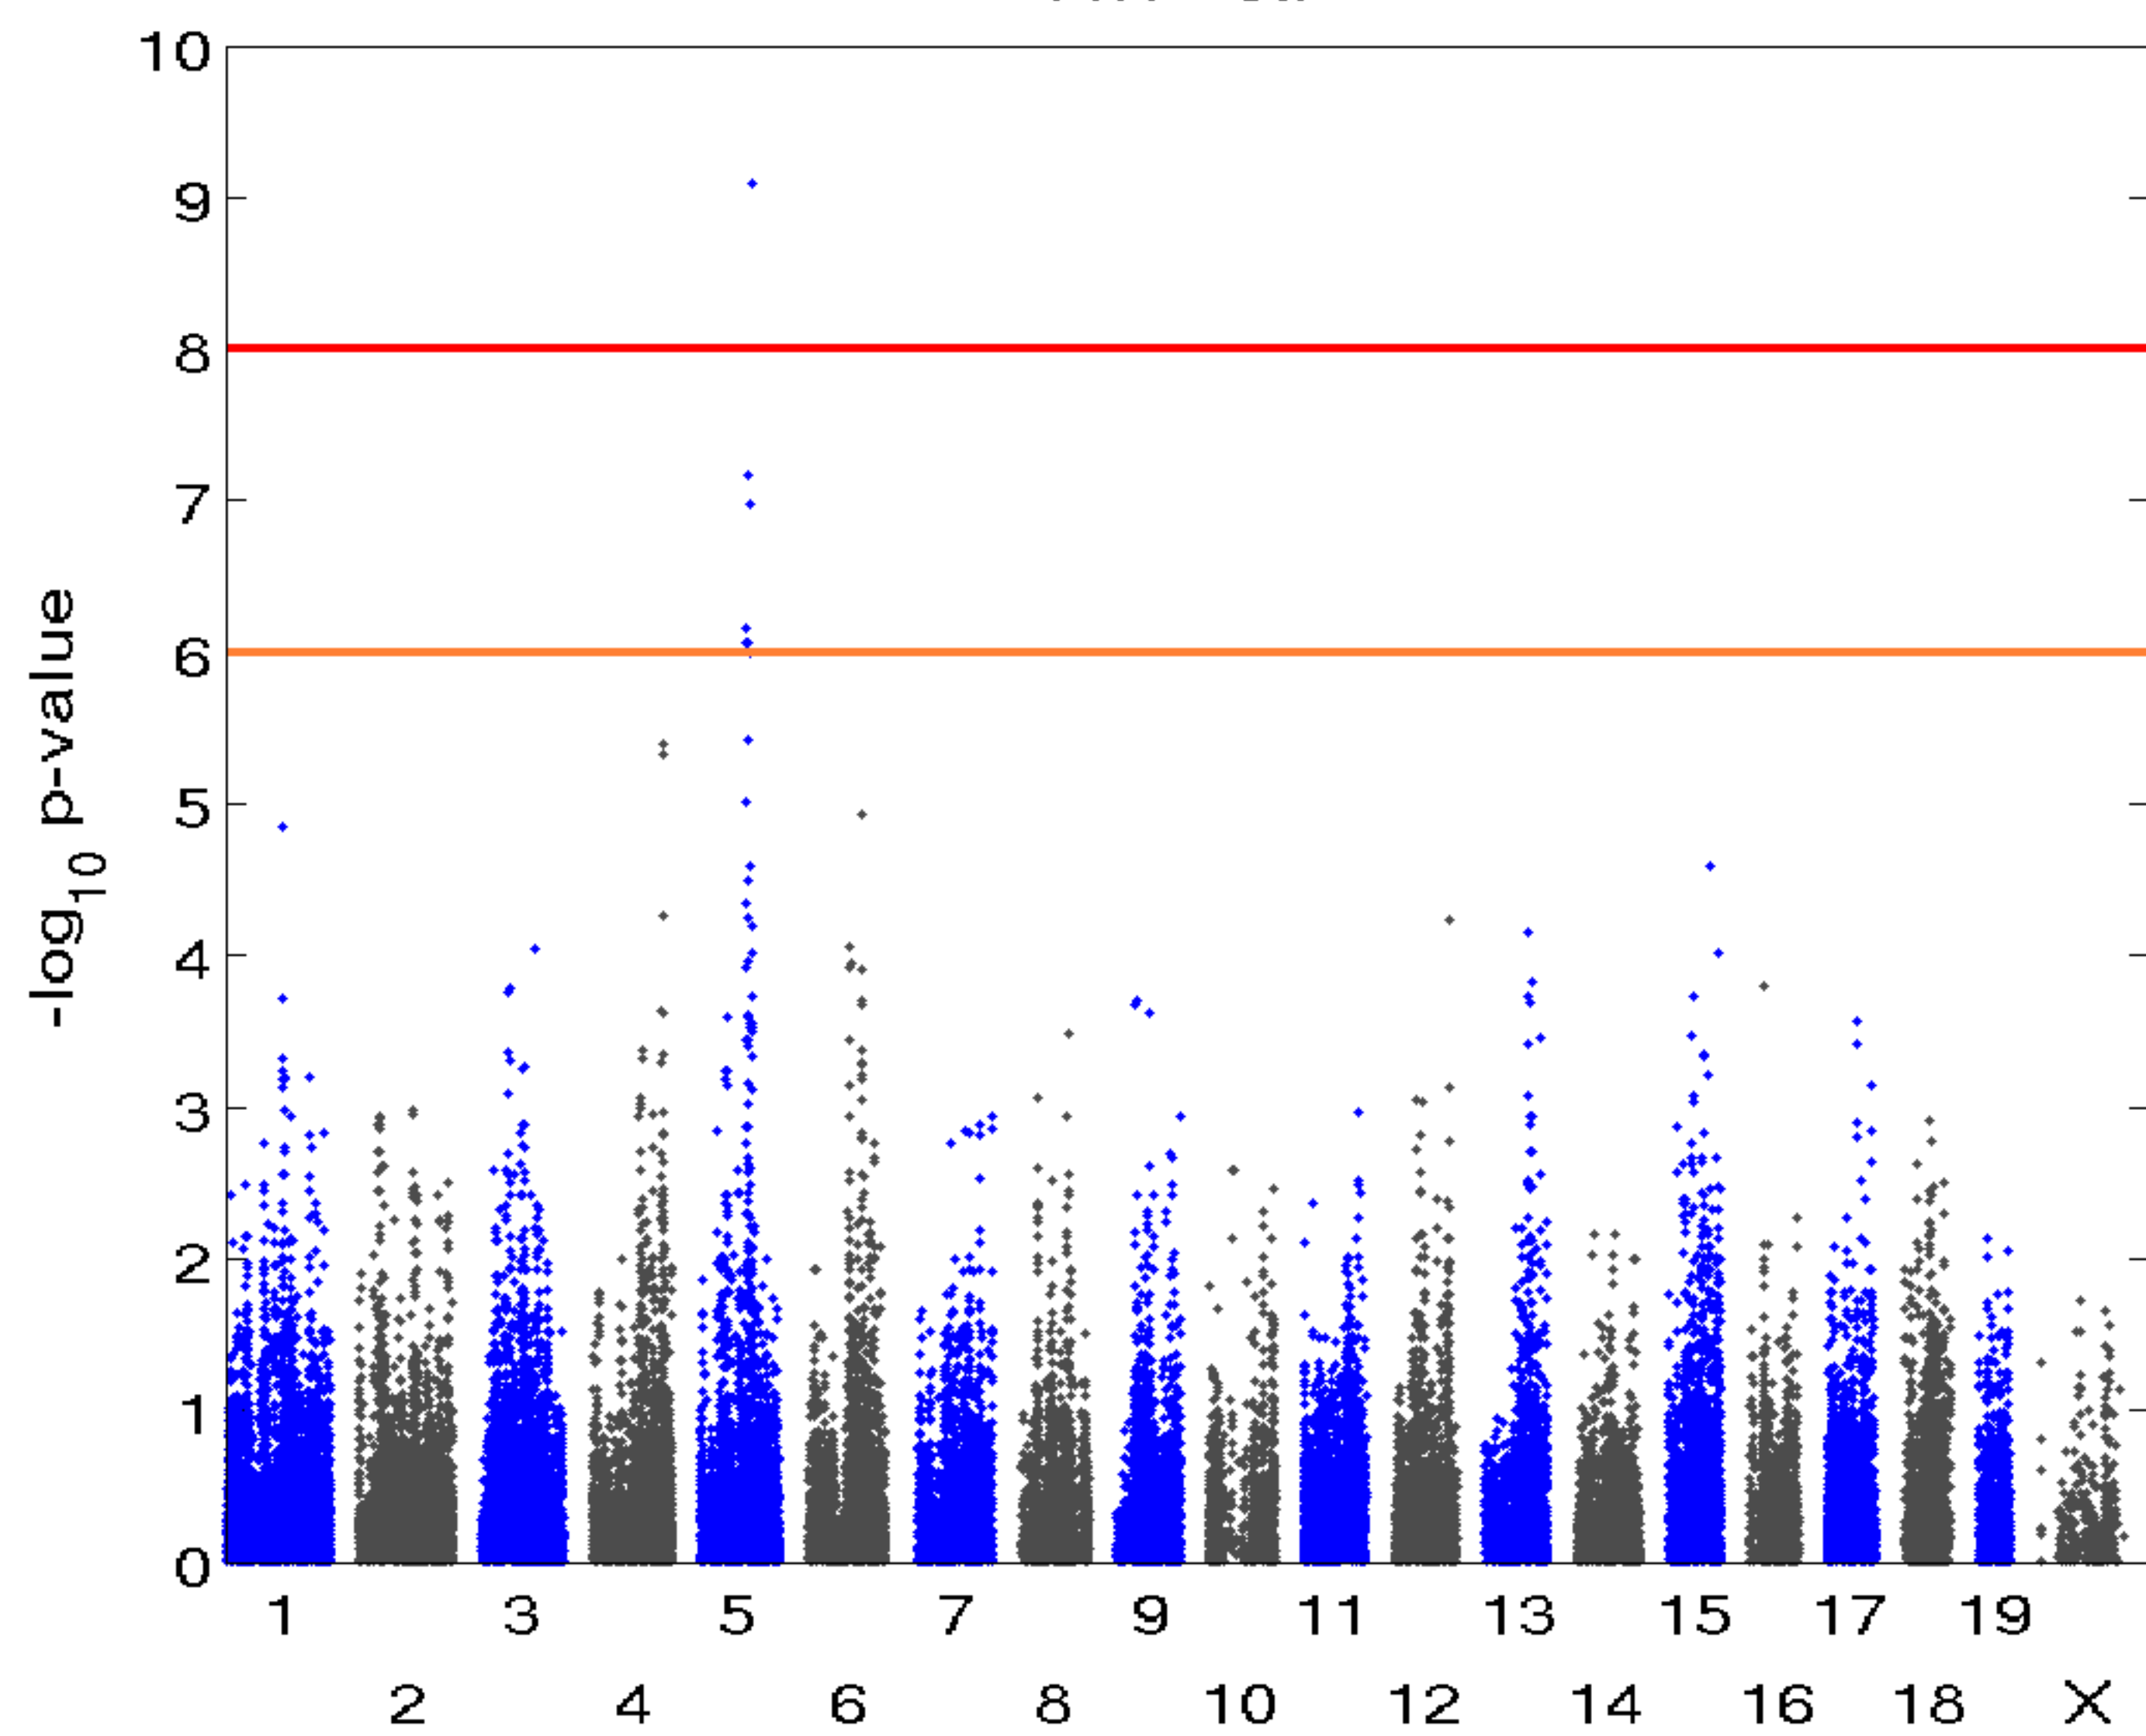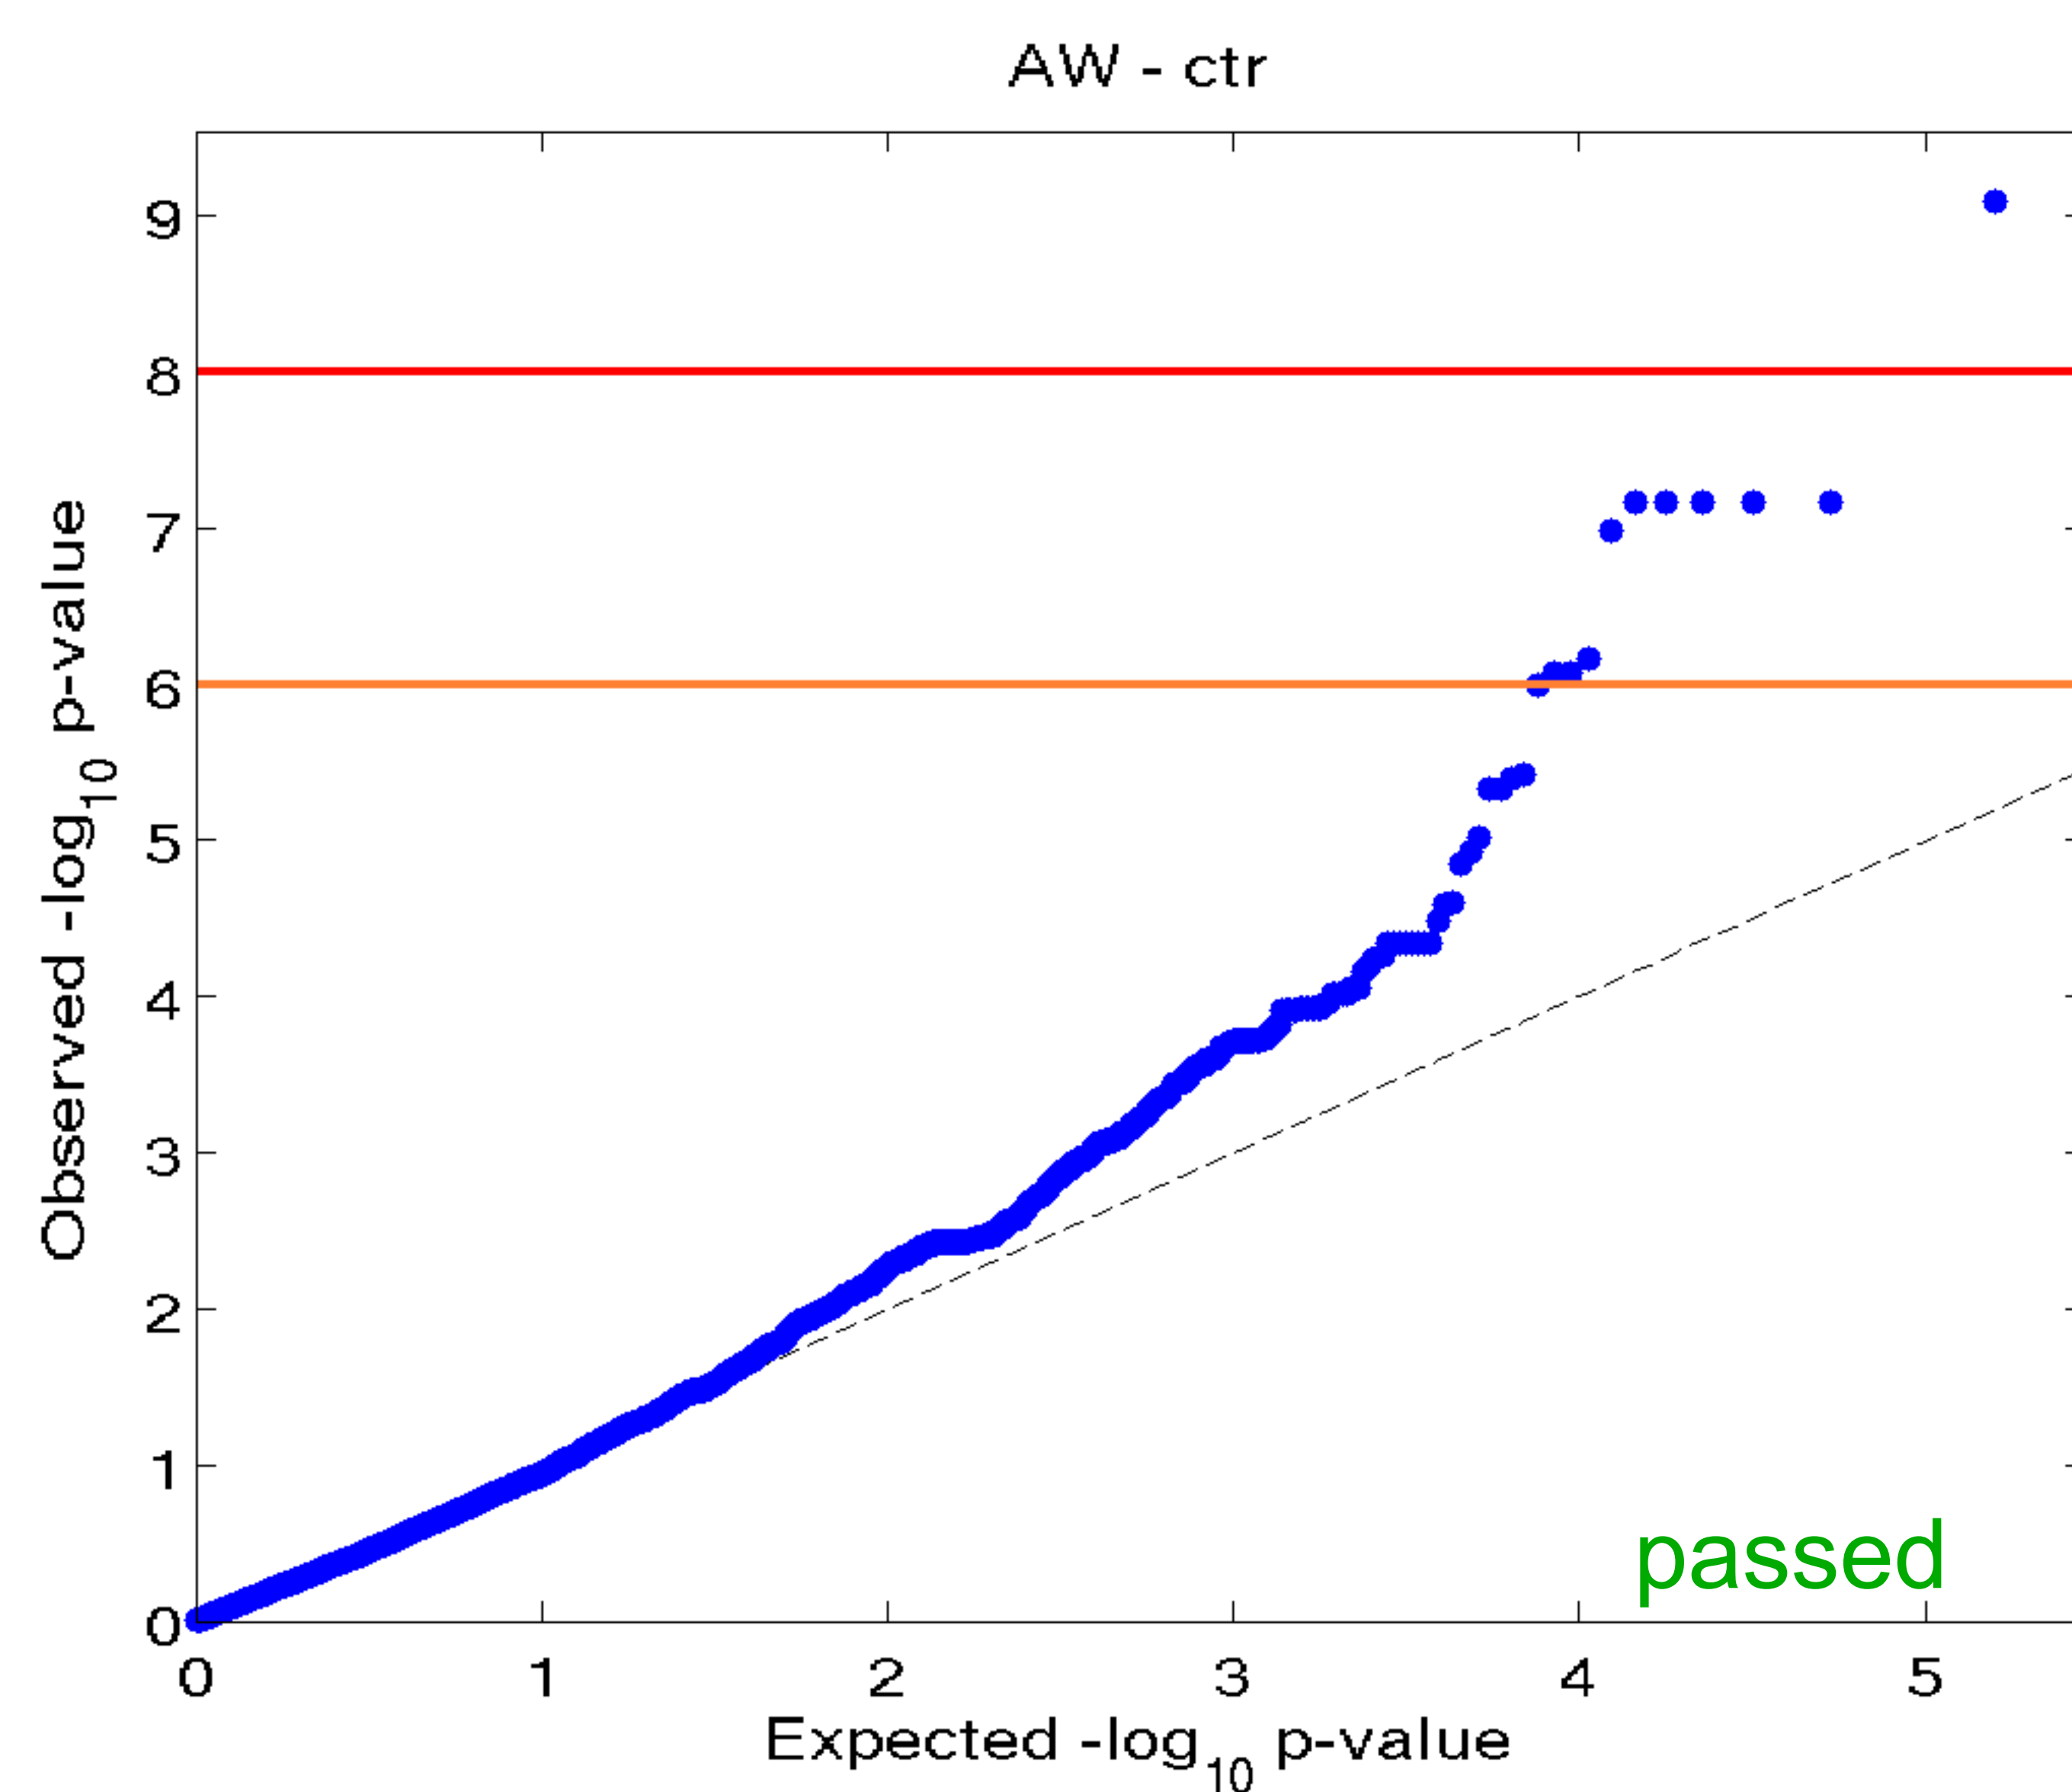

BWE/BWS - ctr

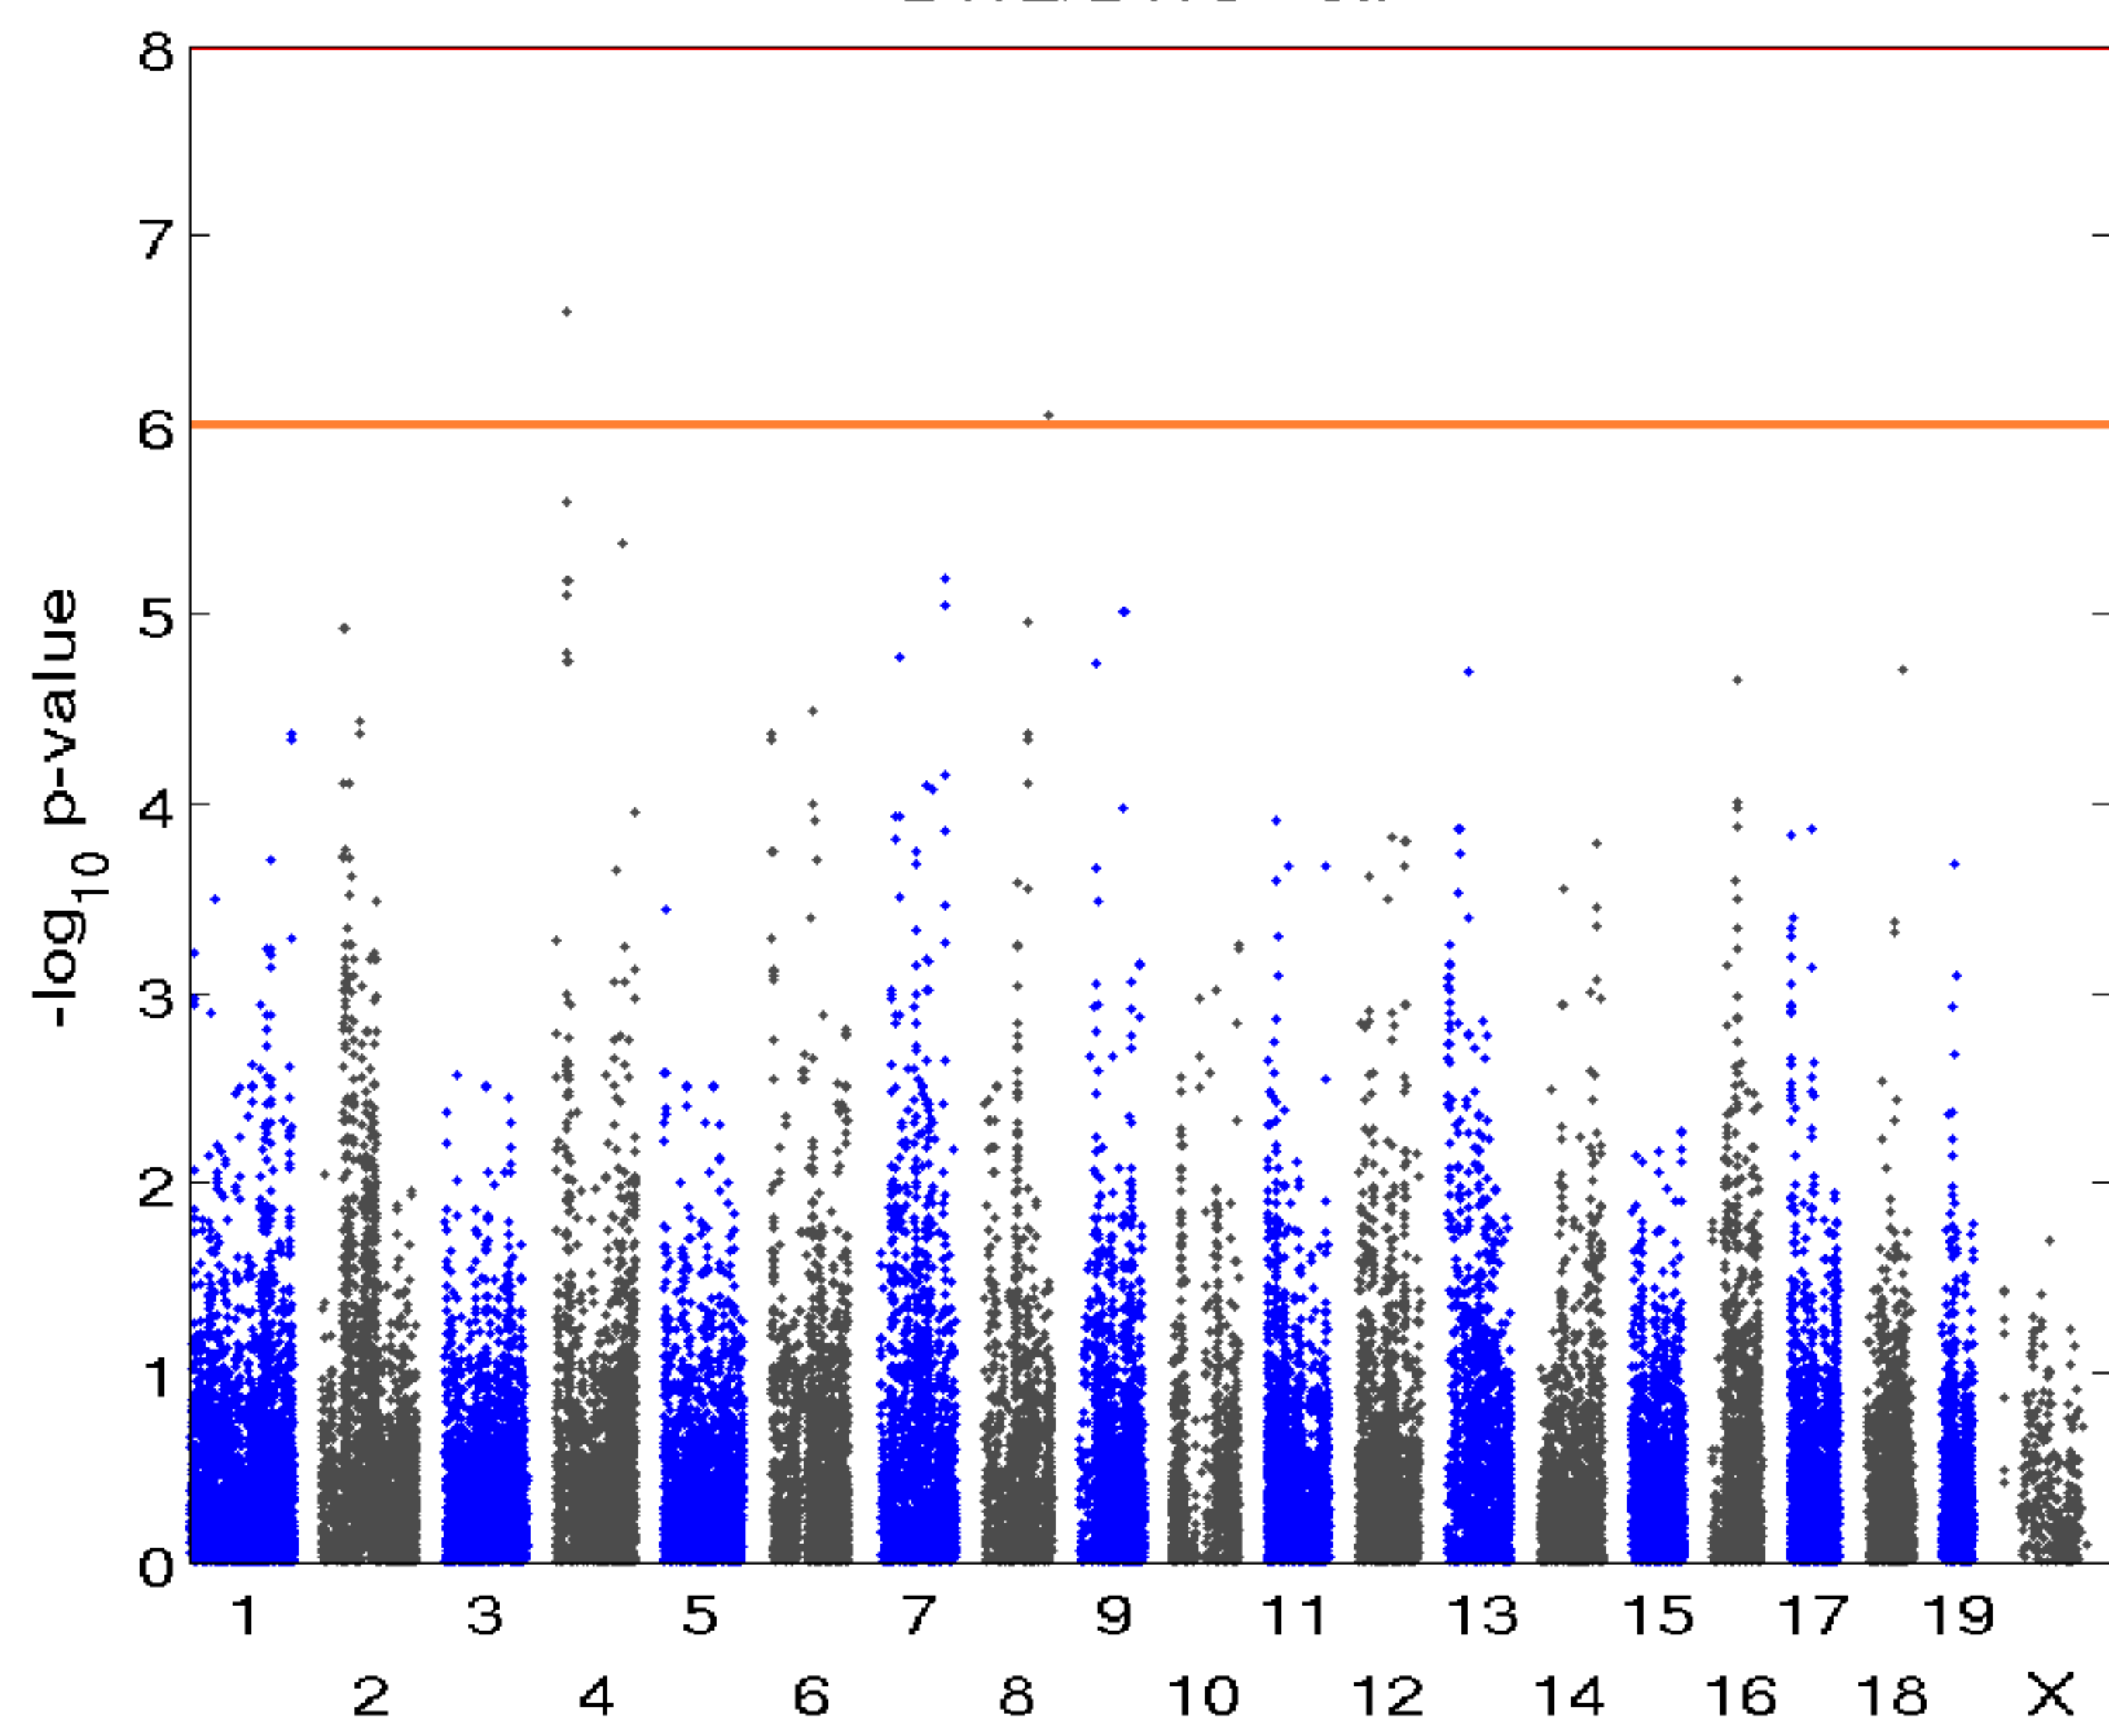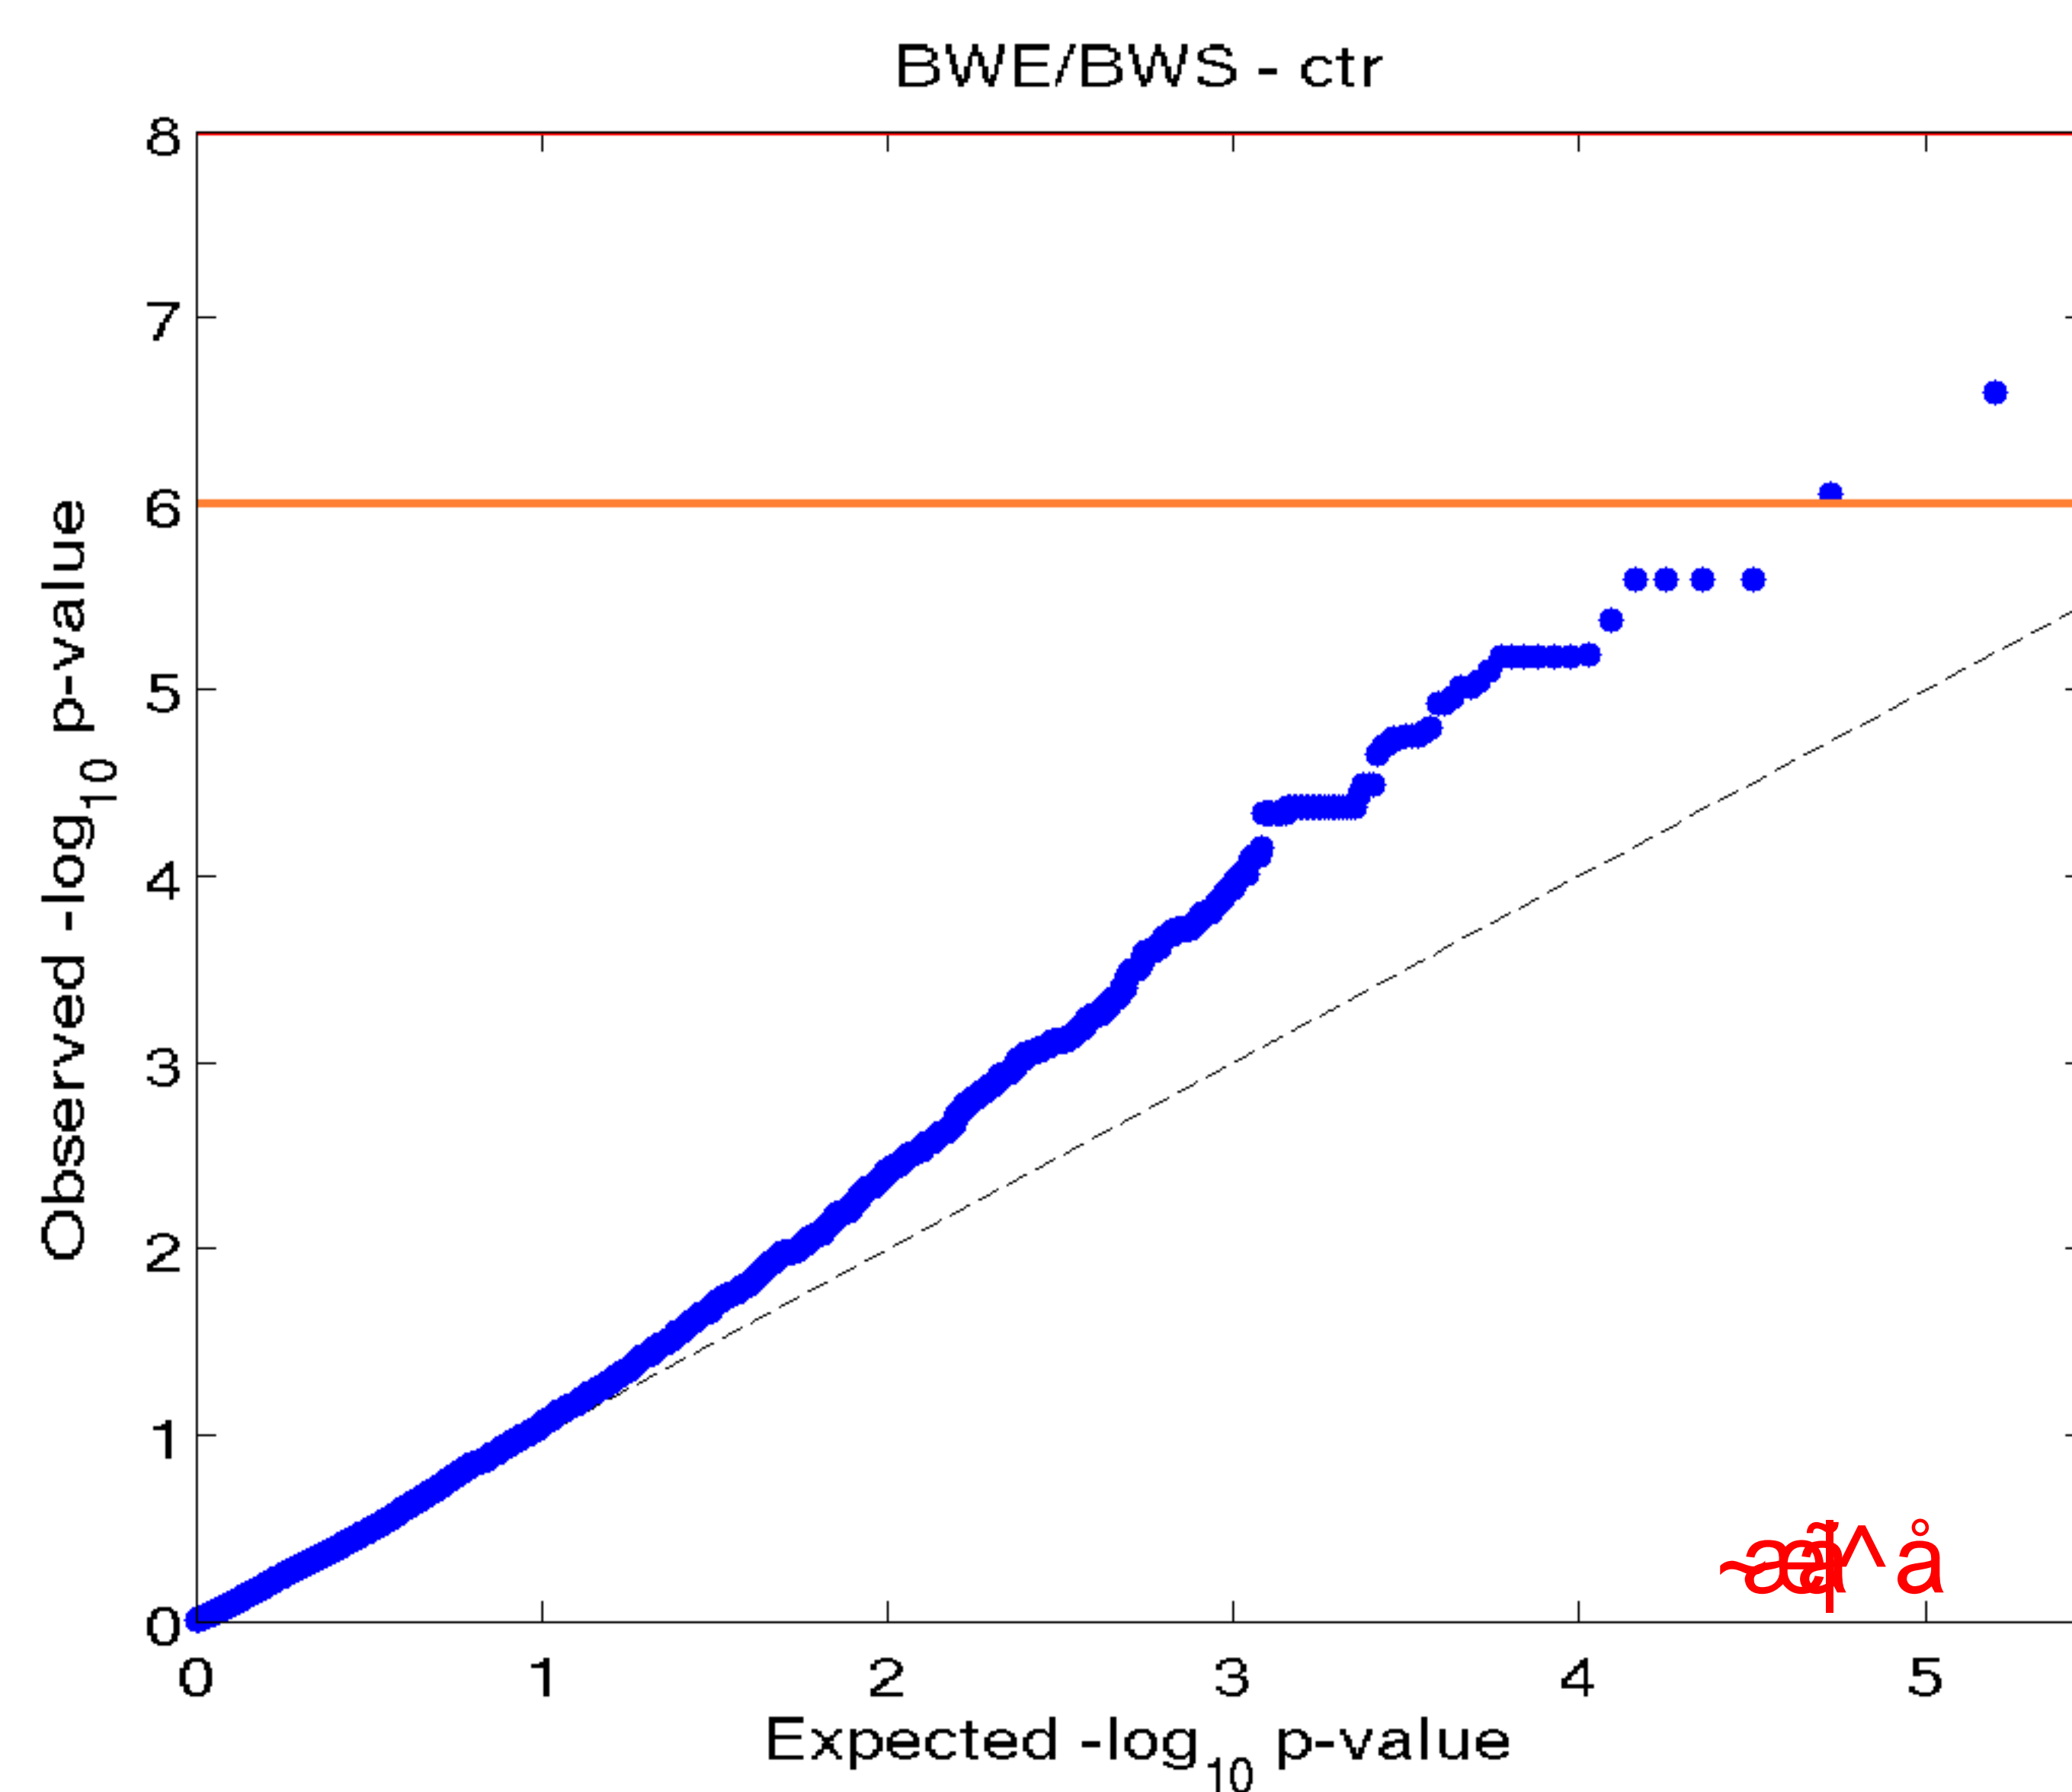



BWE - ctr

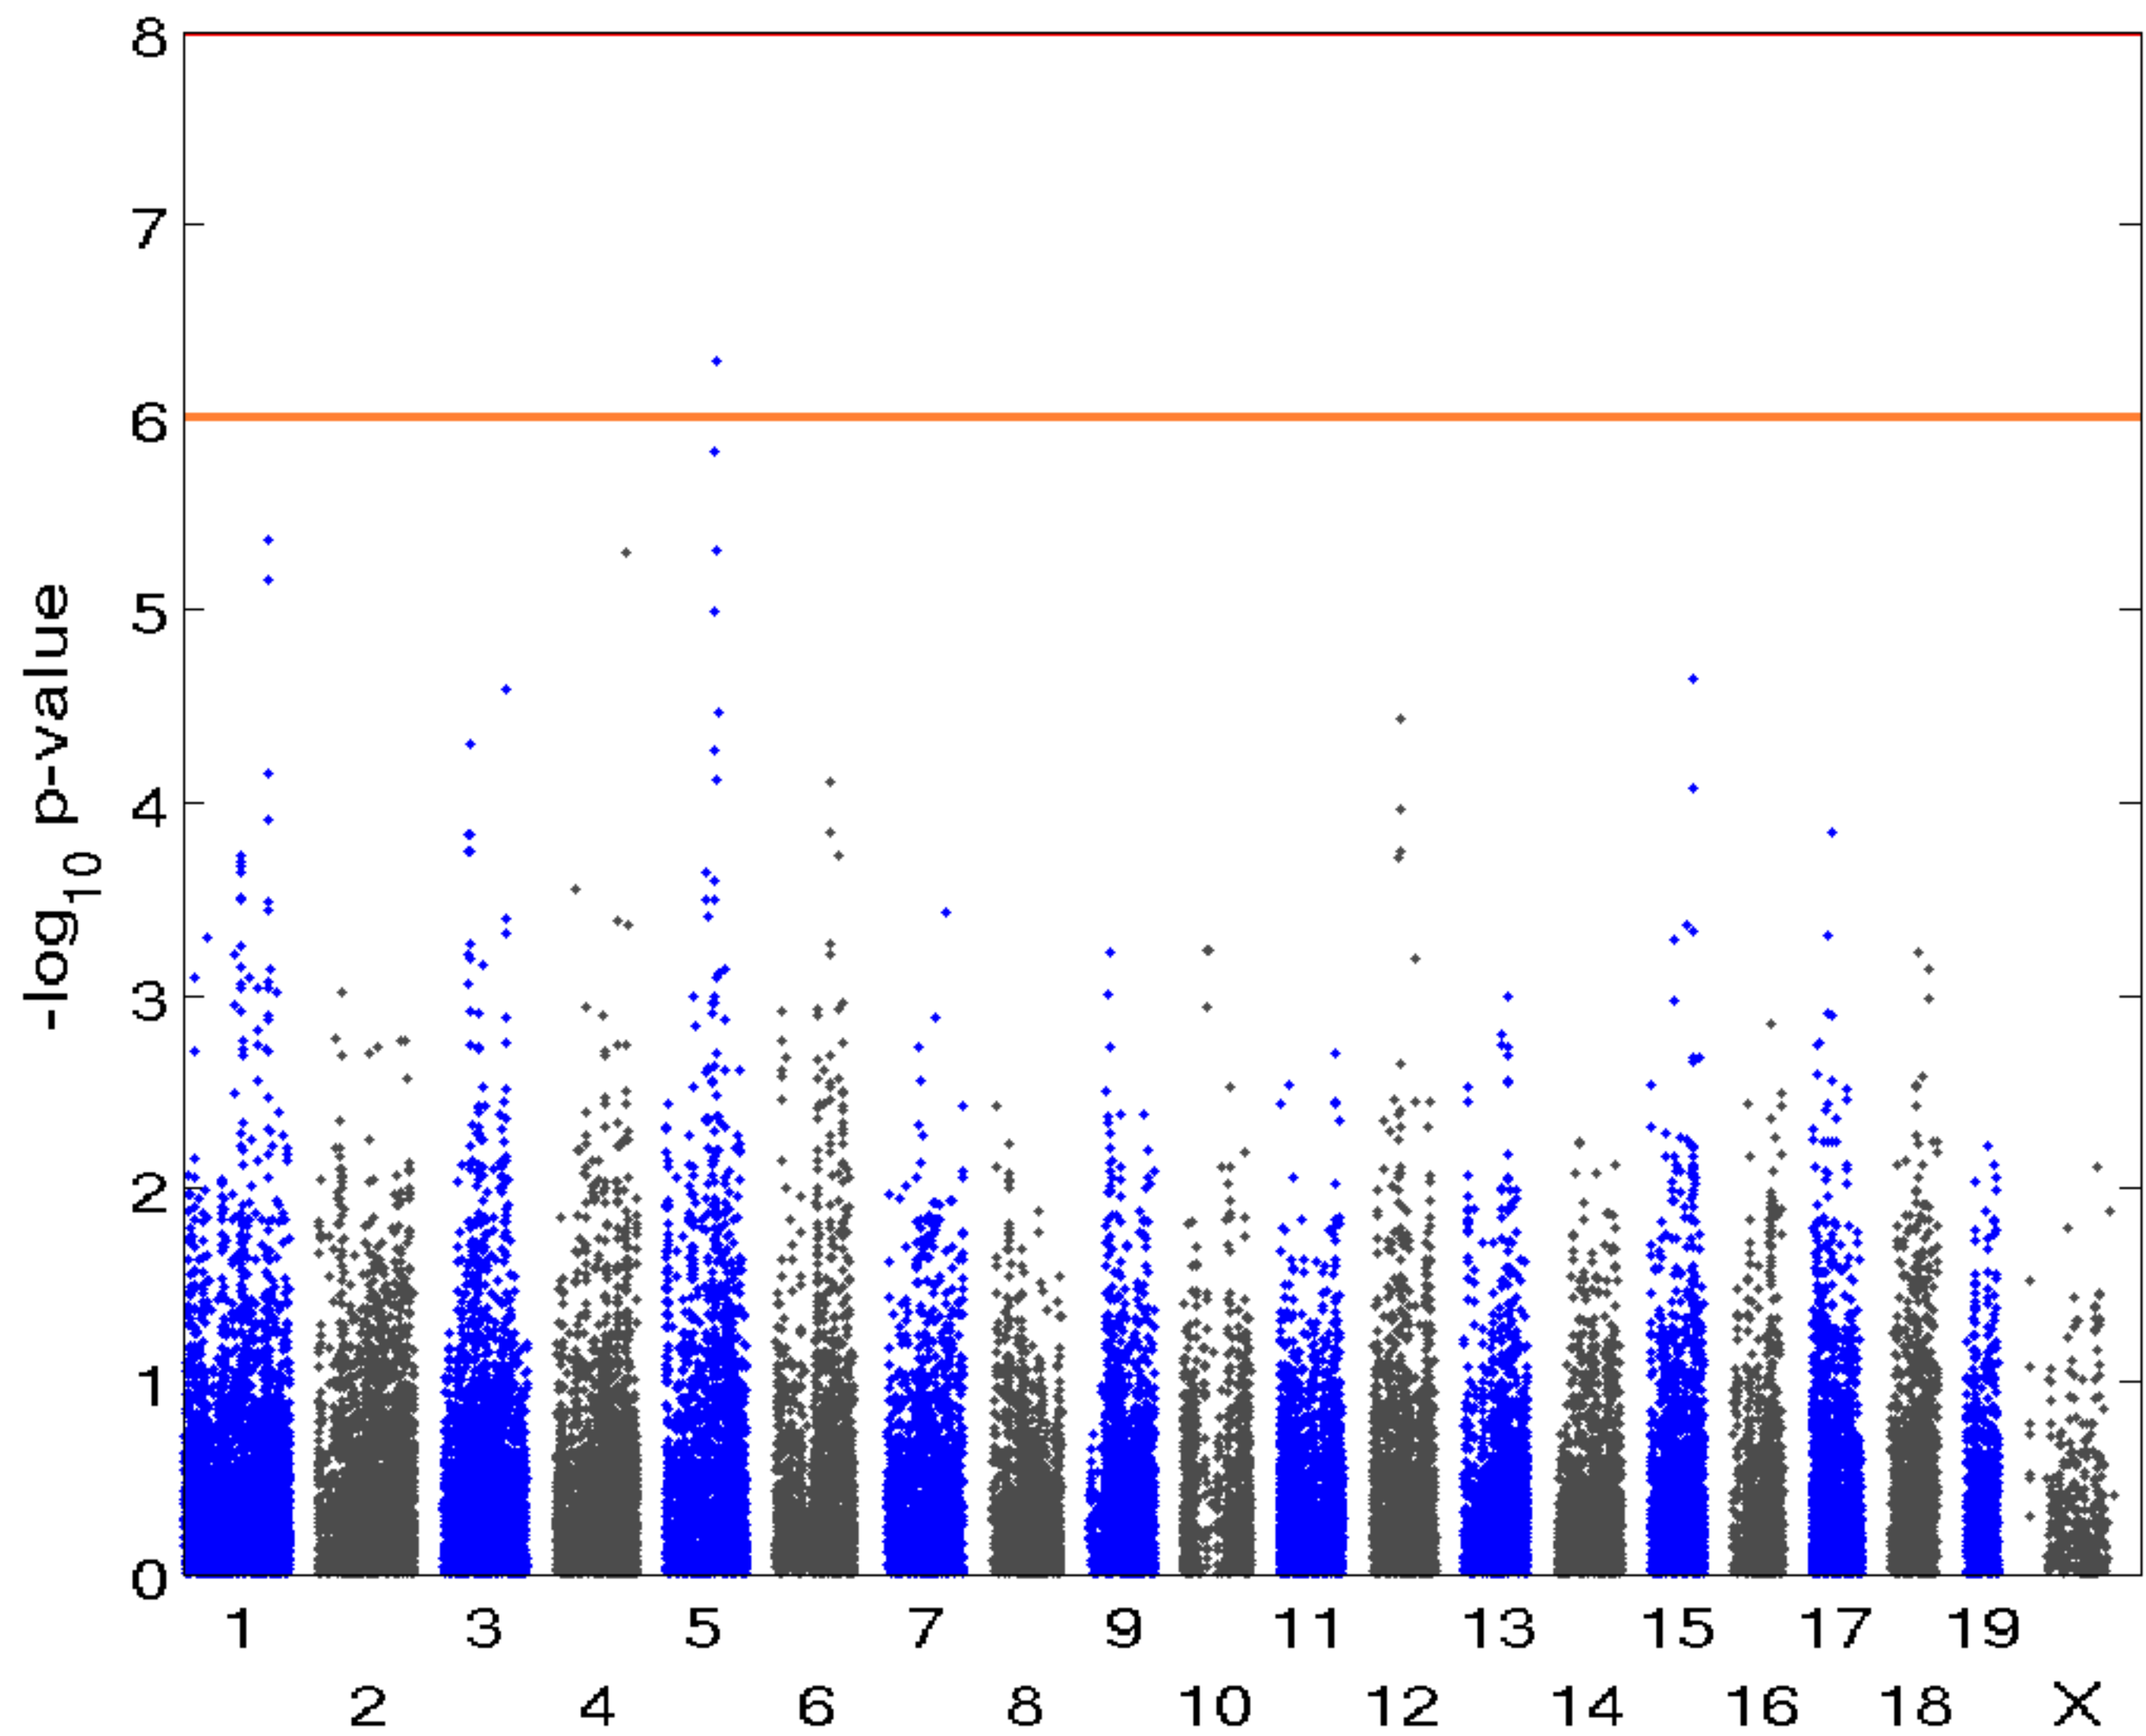

BWE - ctr

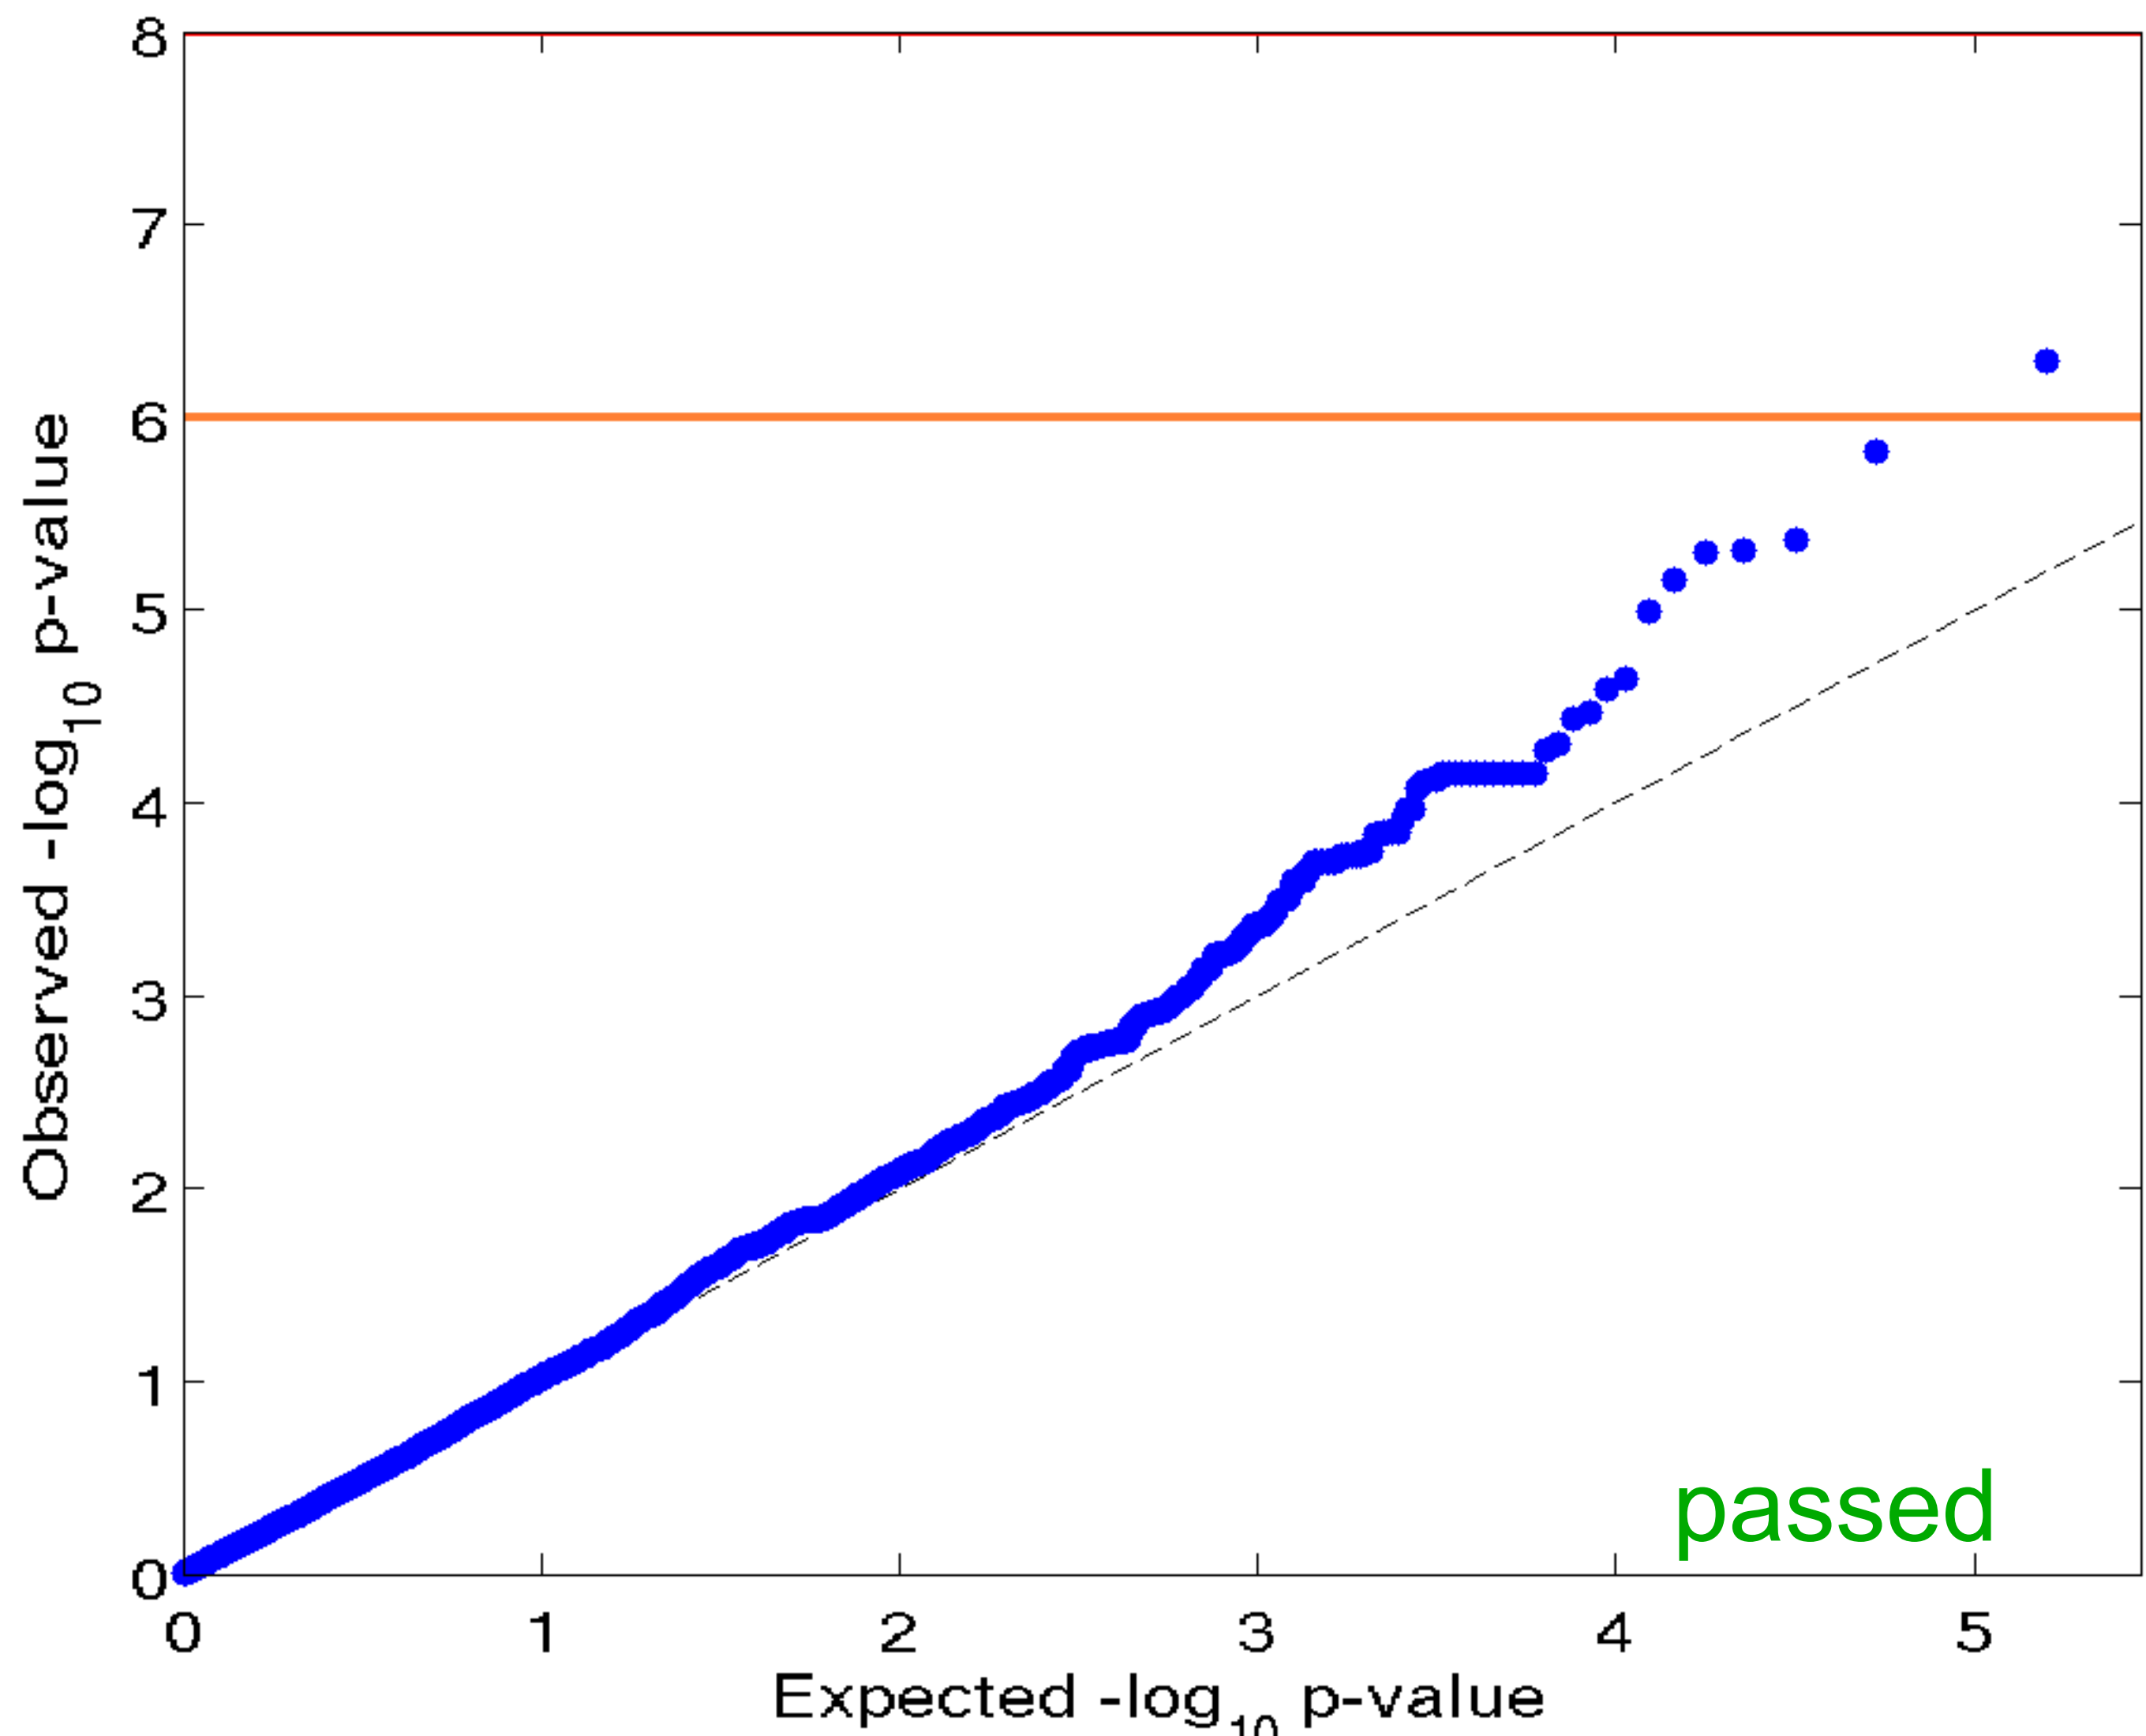

BWS - ctr

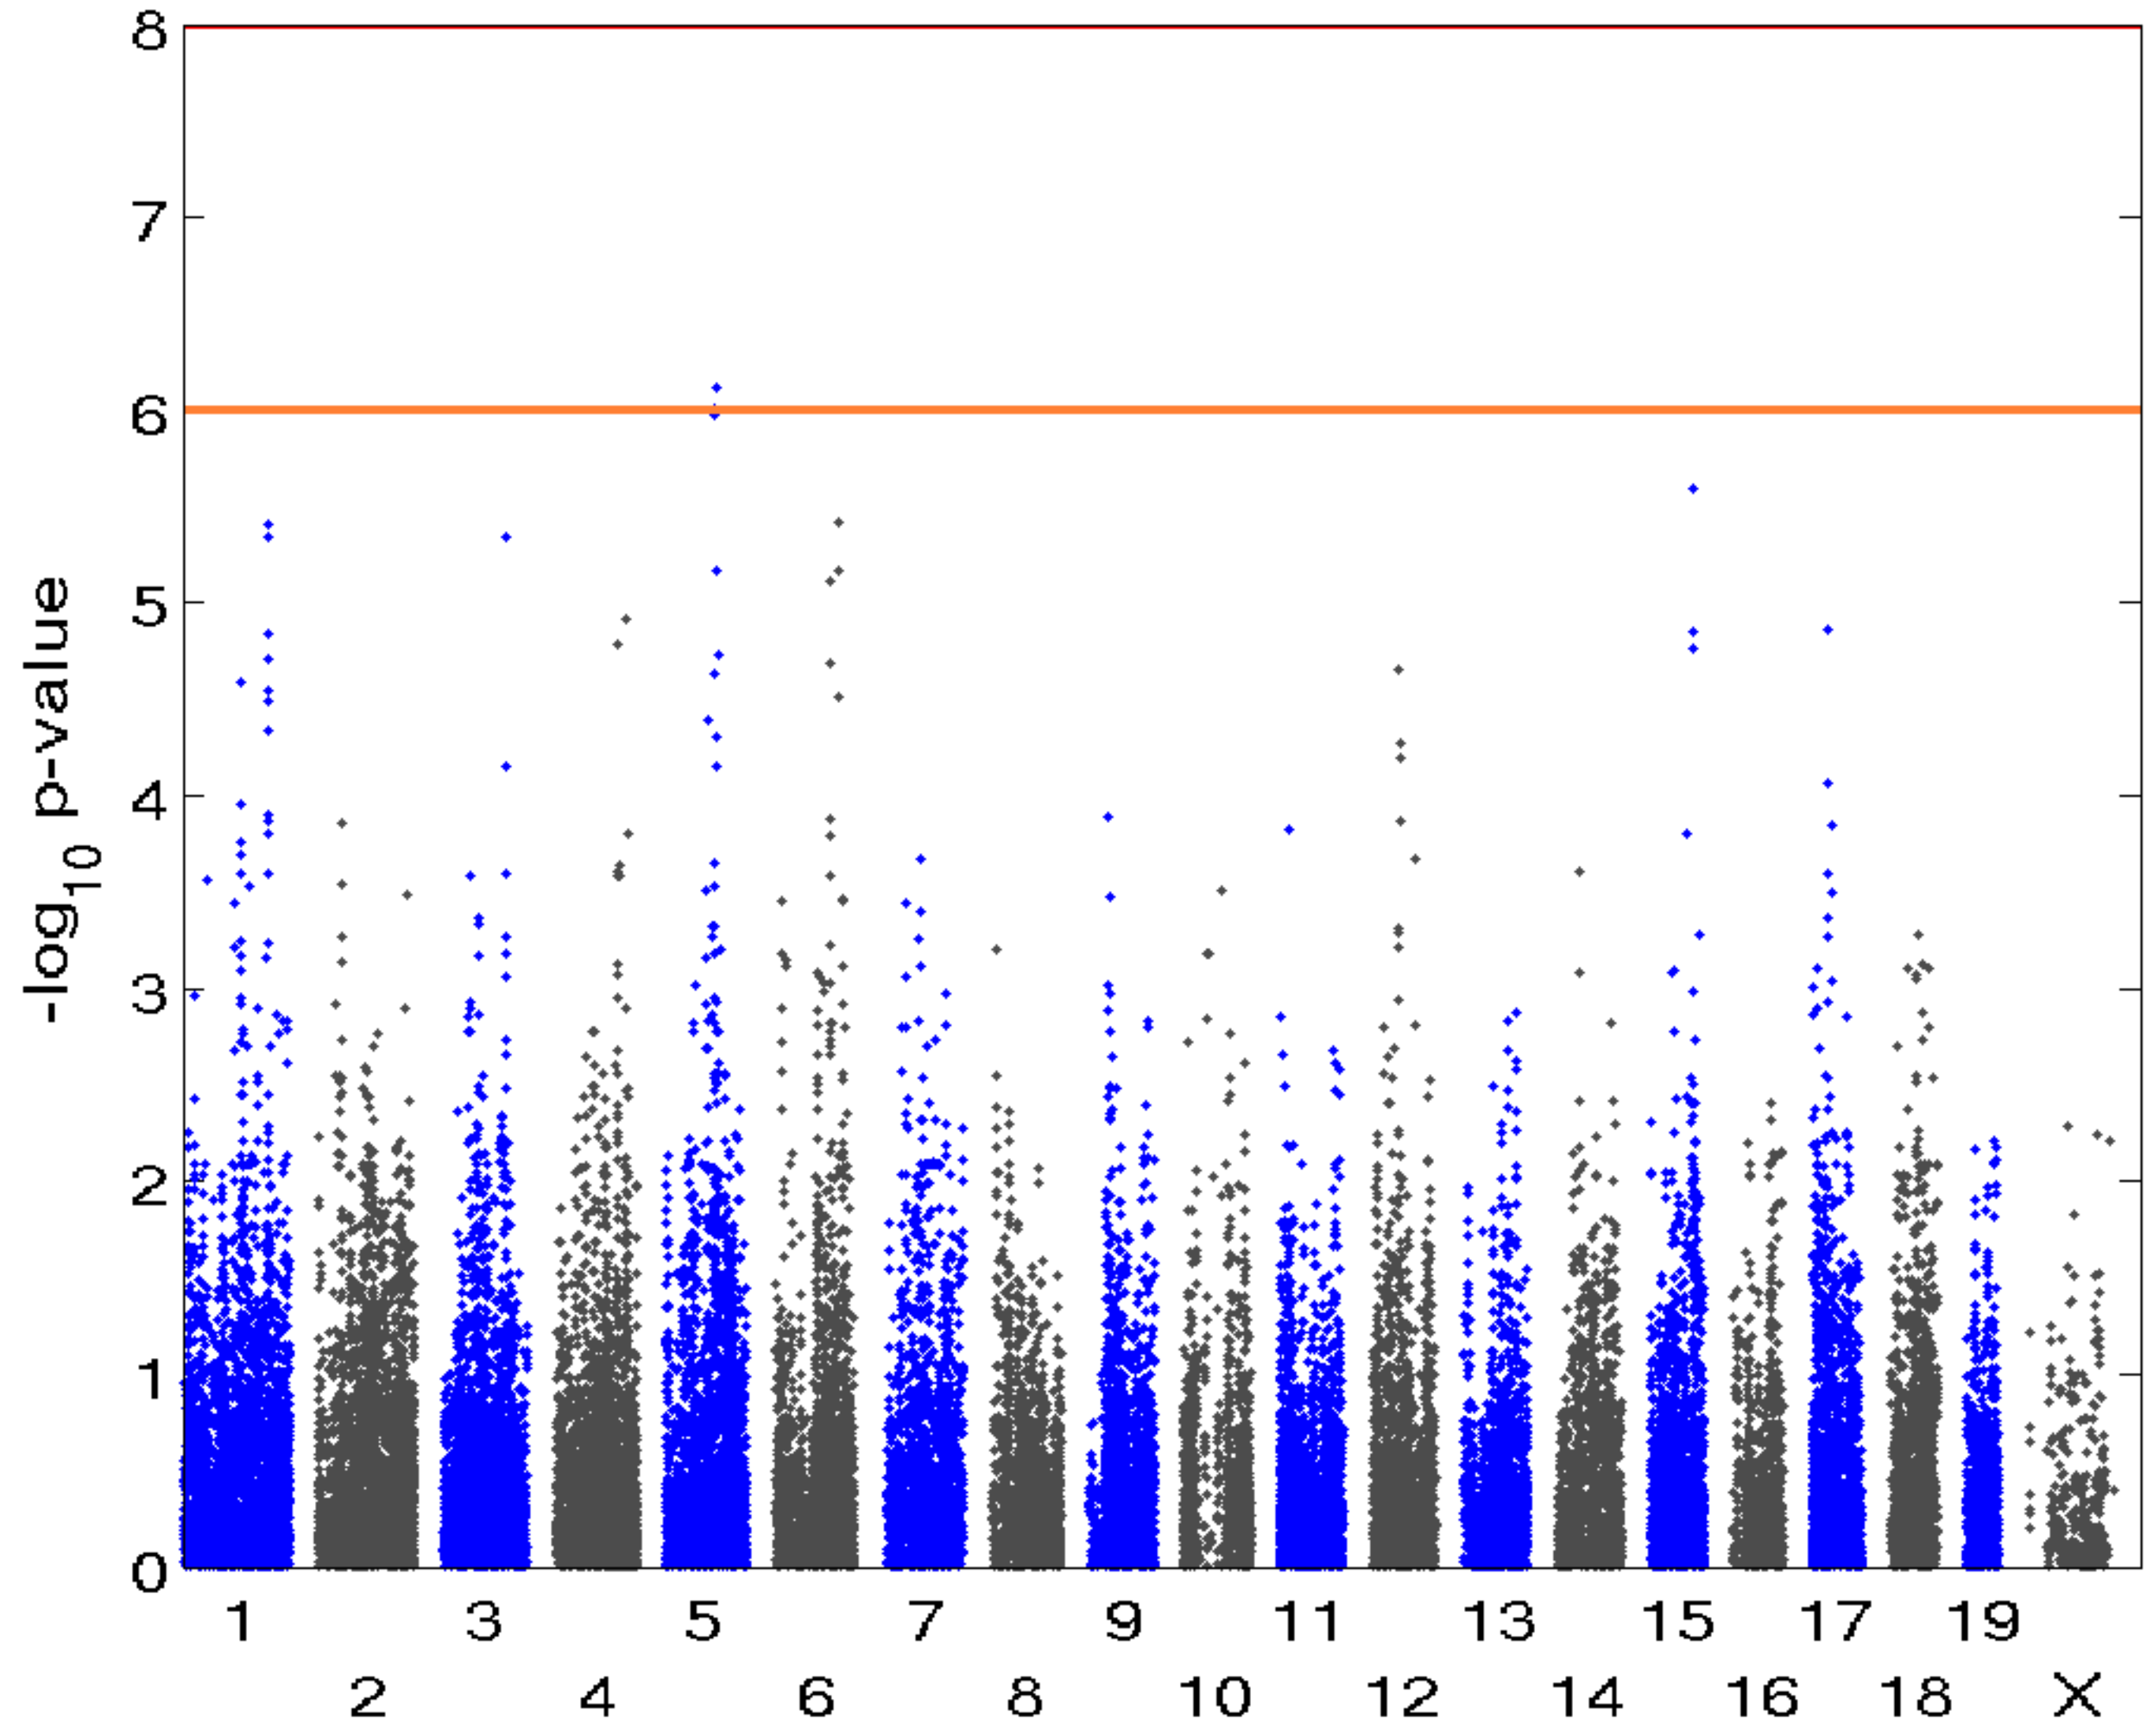

BWS - ctr

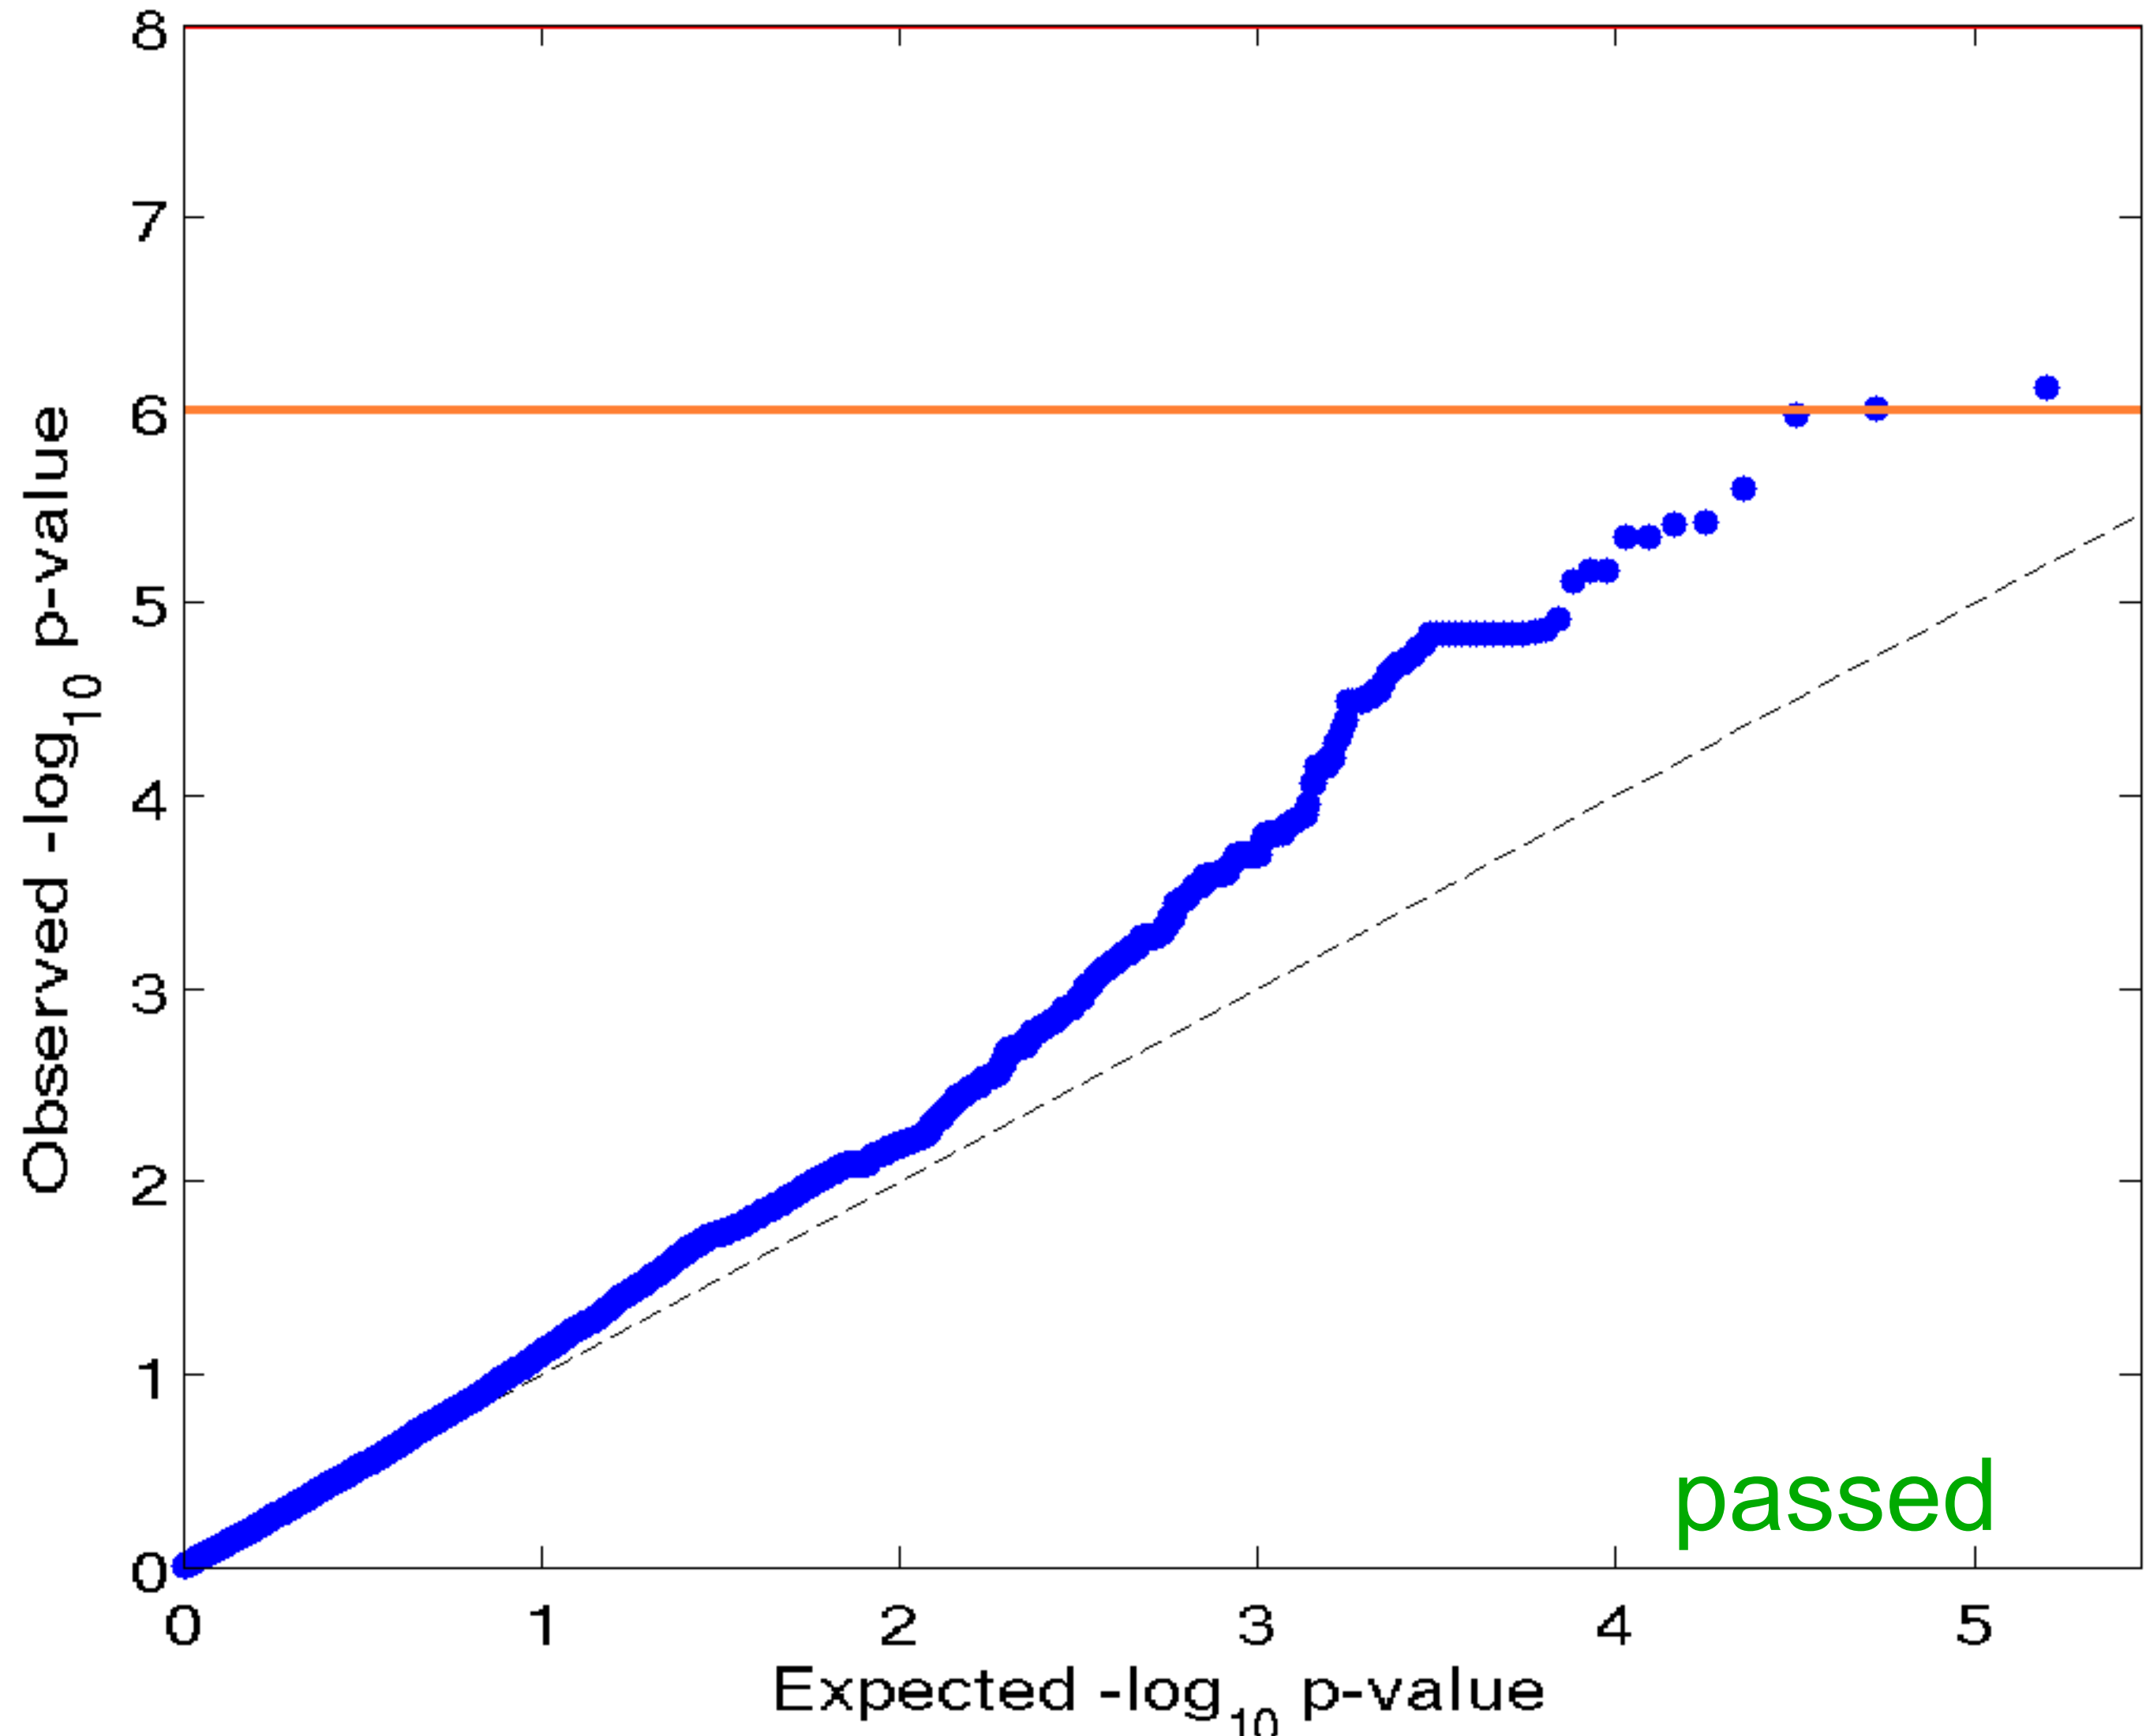

HR-ECG - ctr

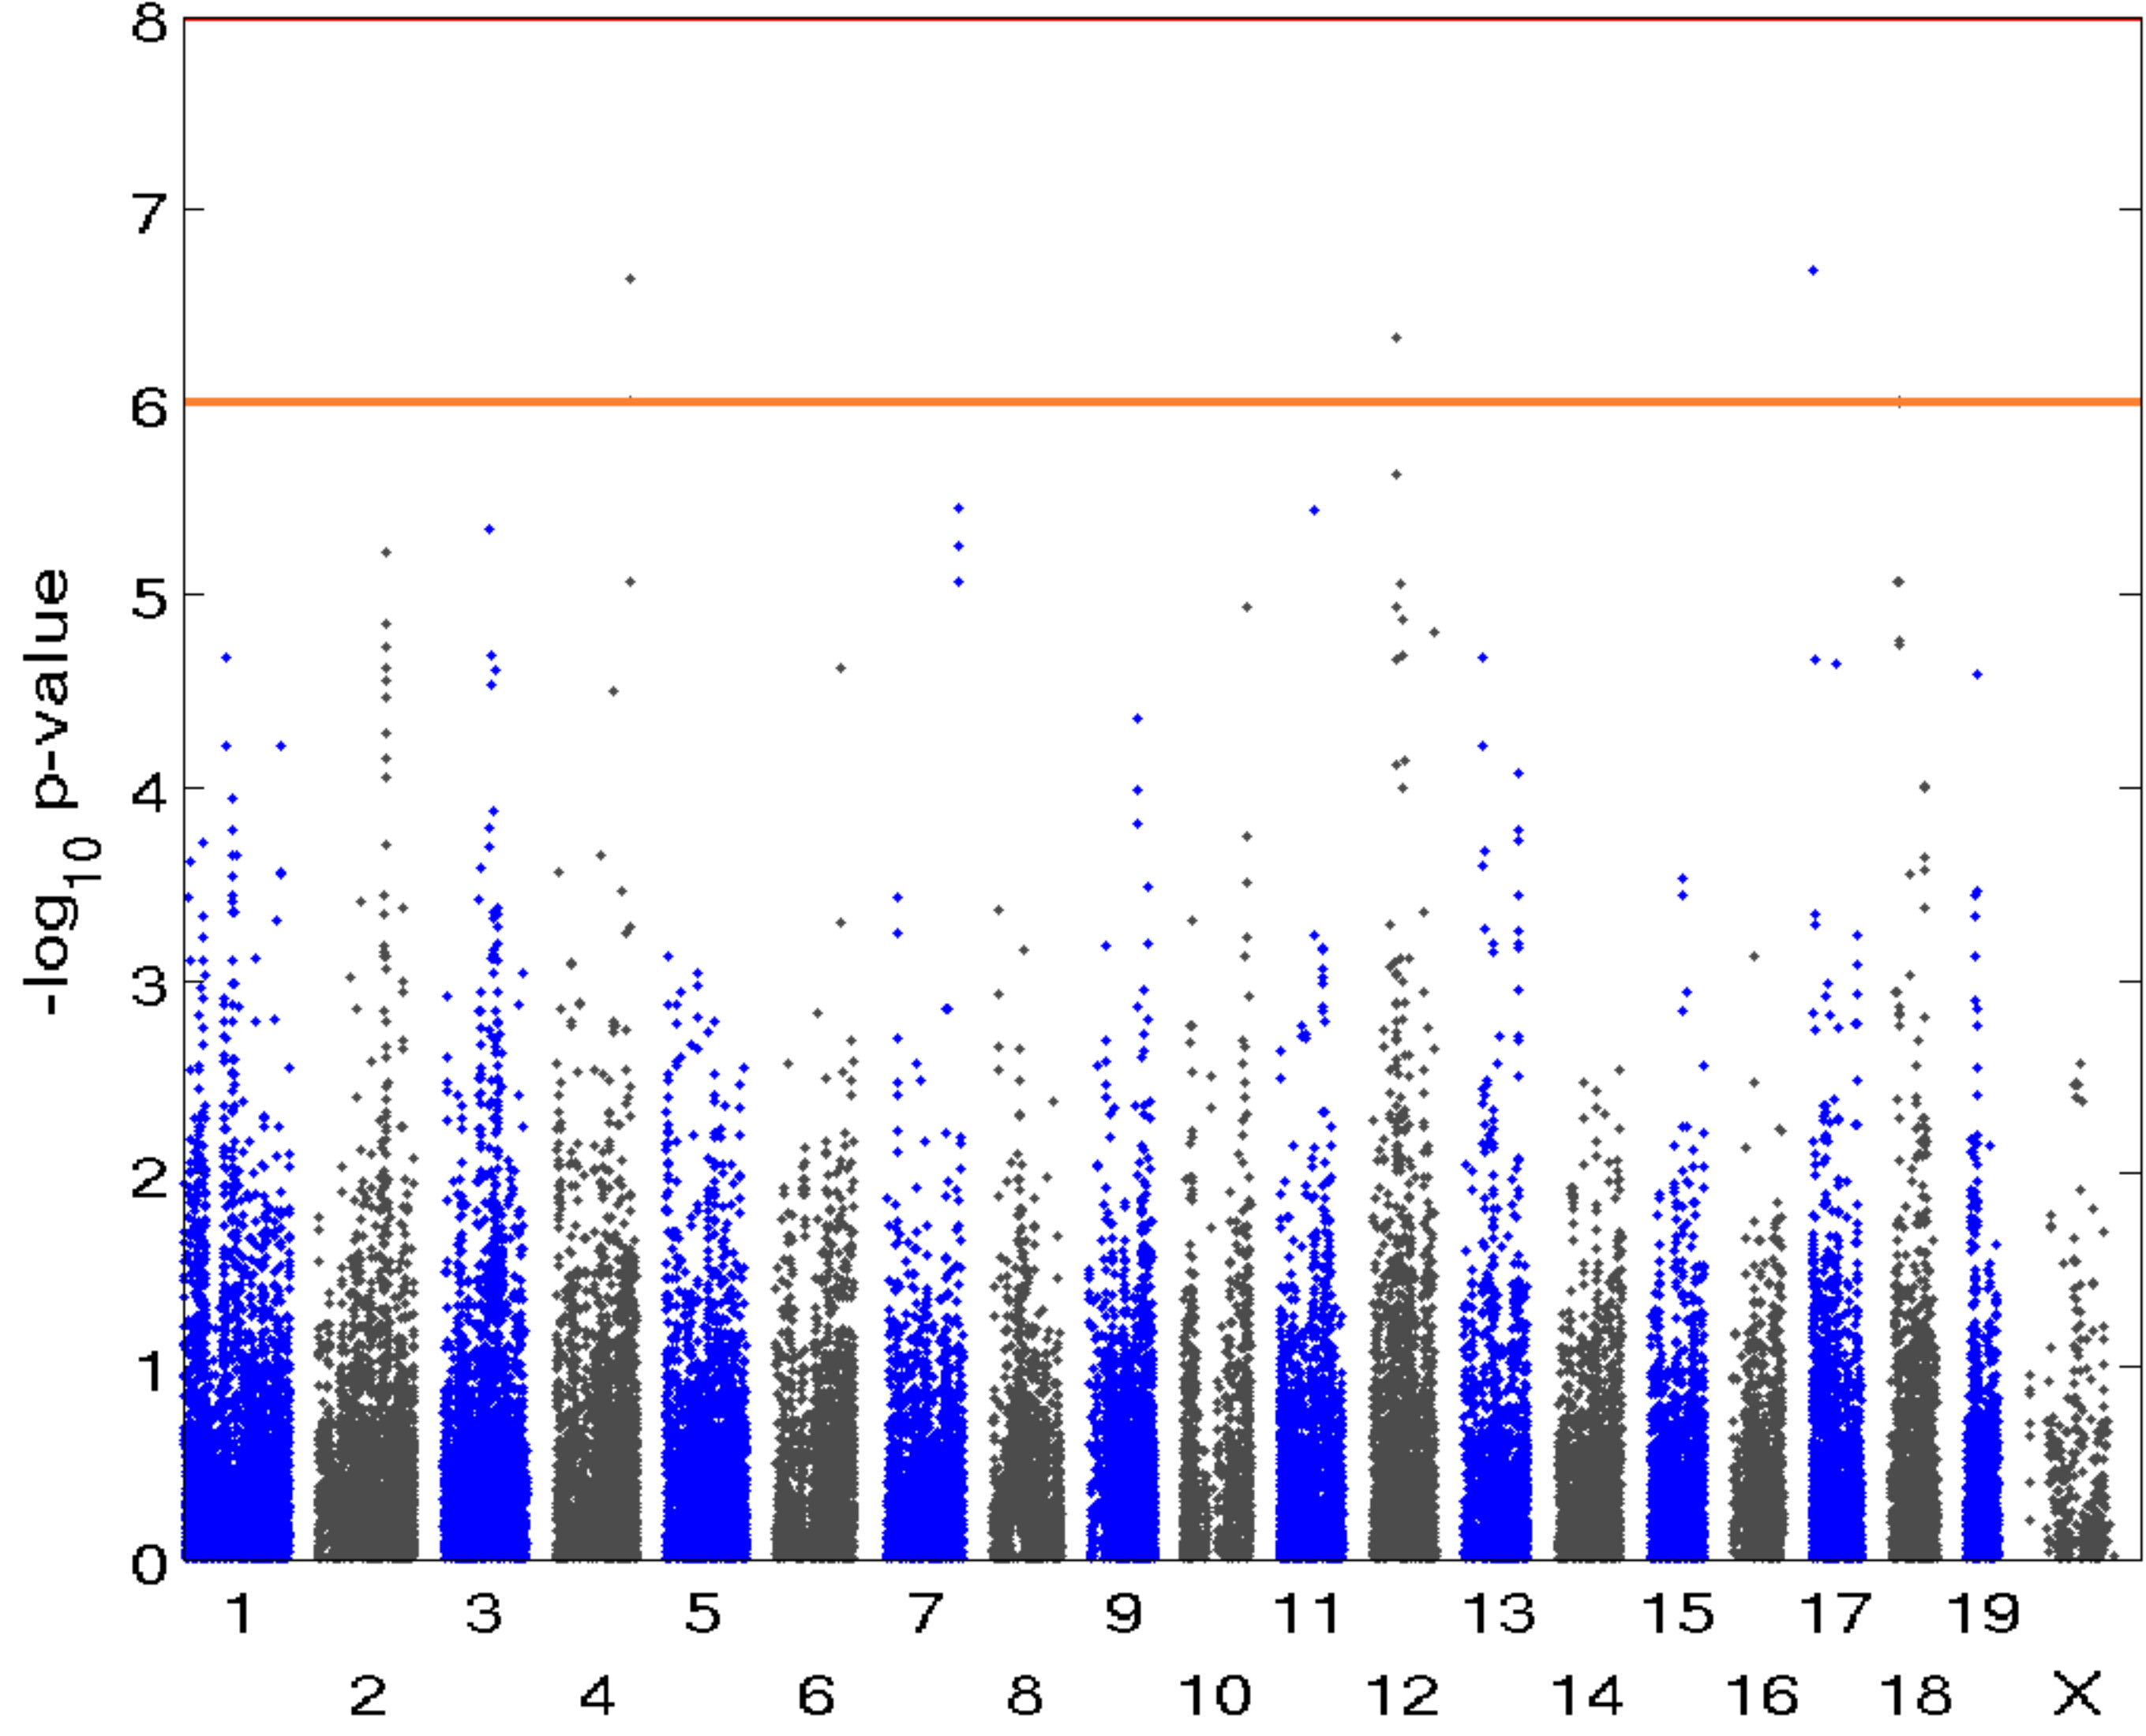

HR-ECG - ctr

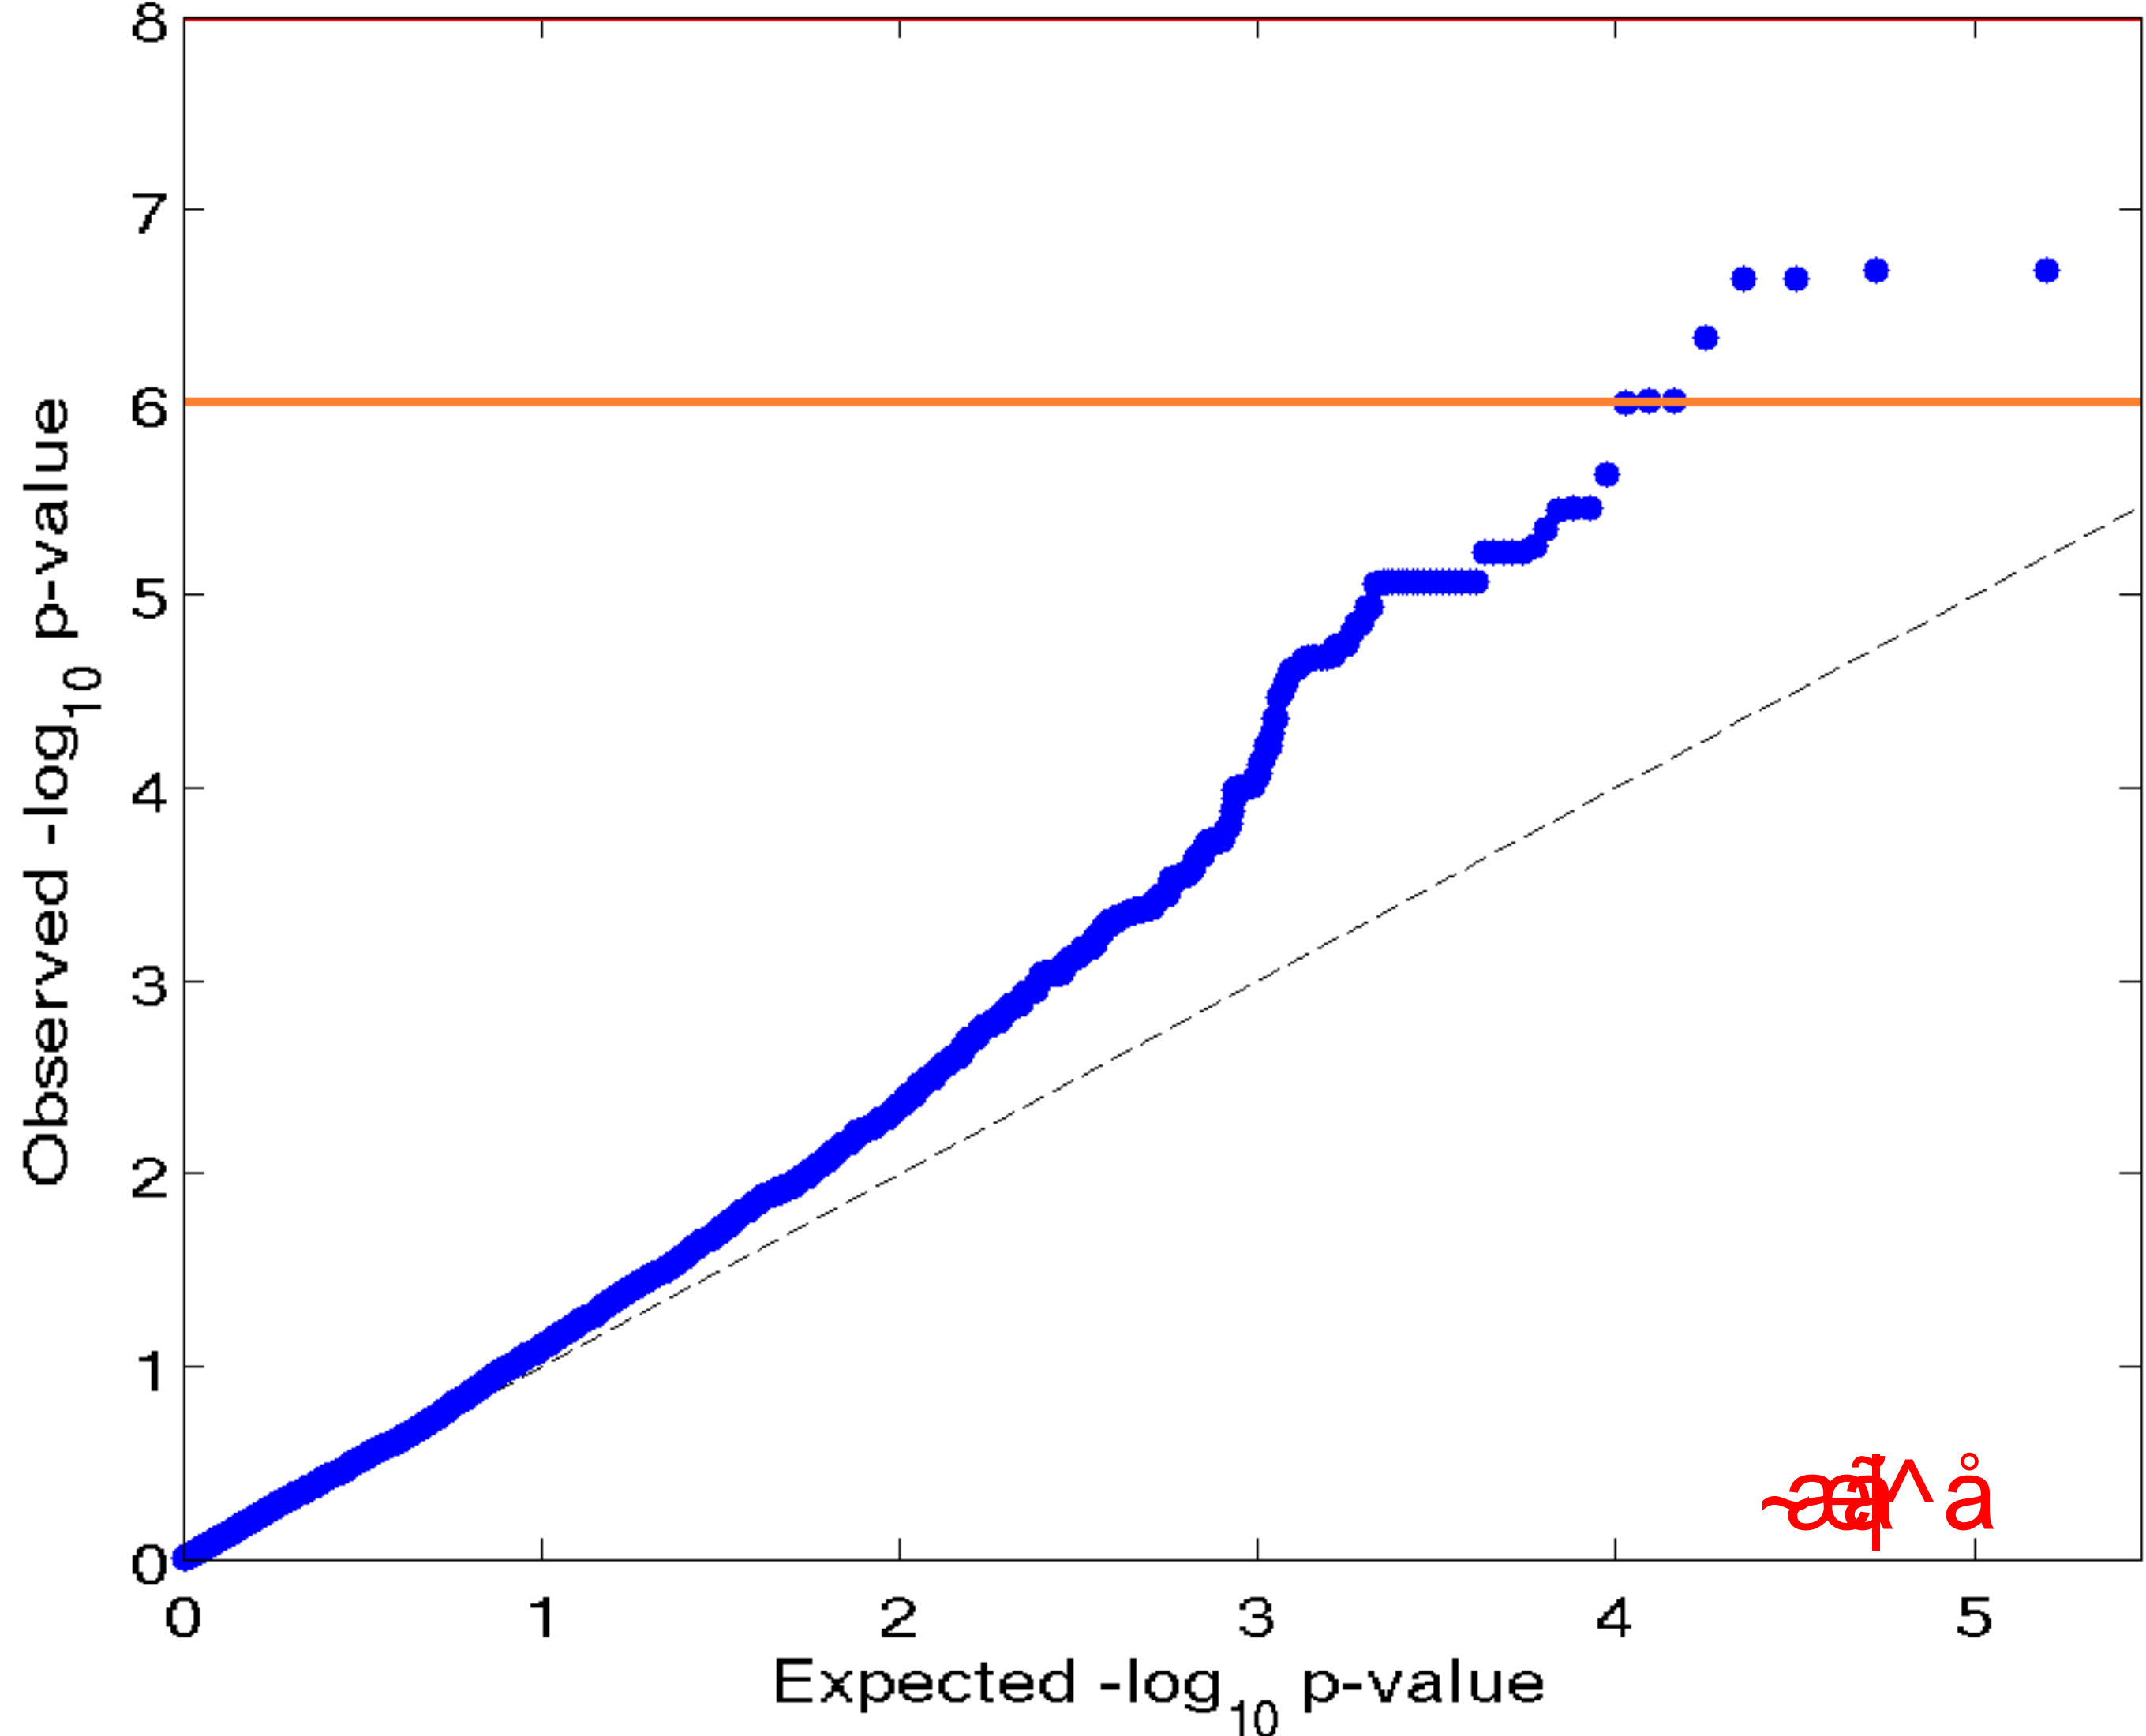

HR-TC - ctr

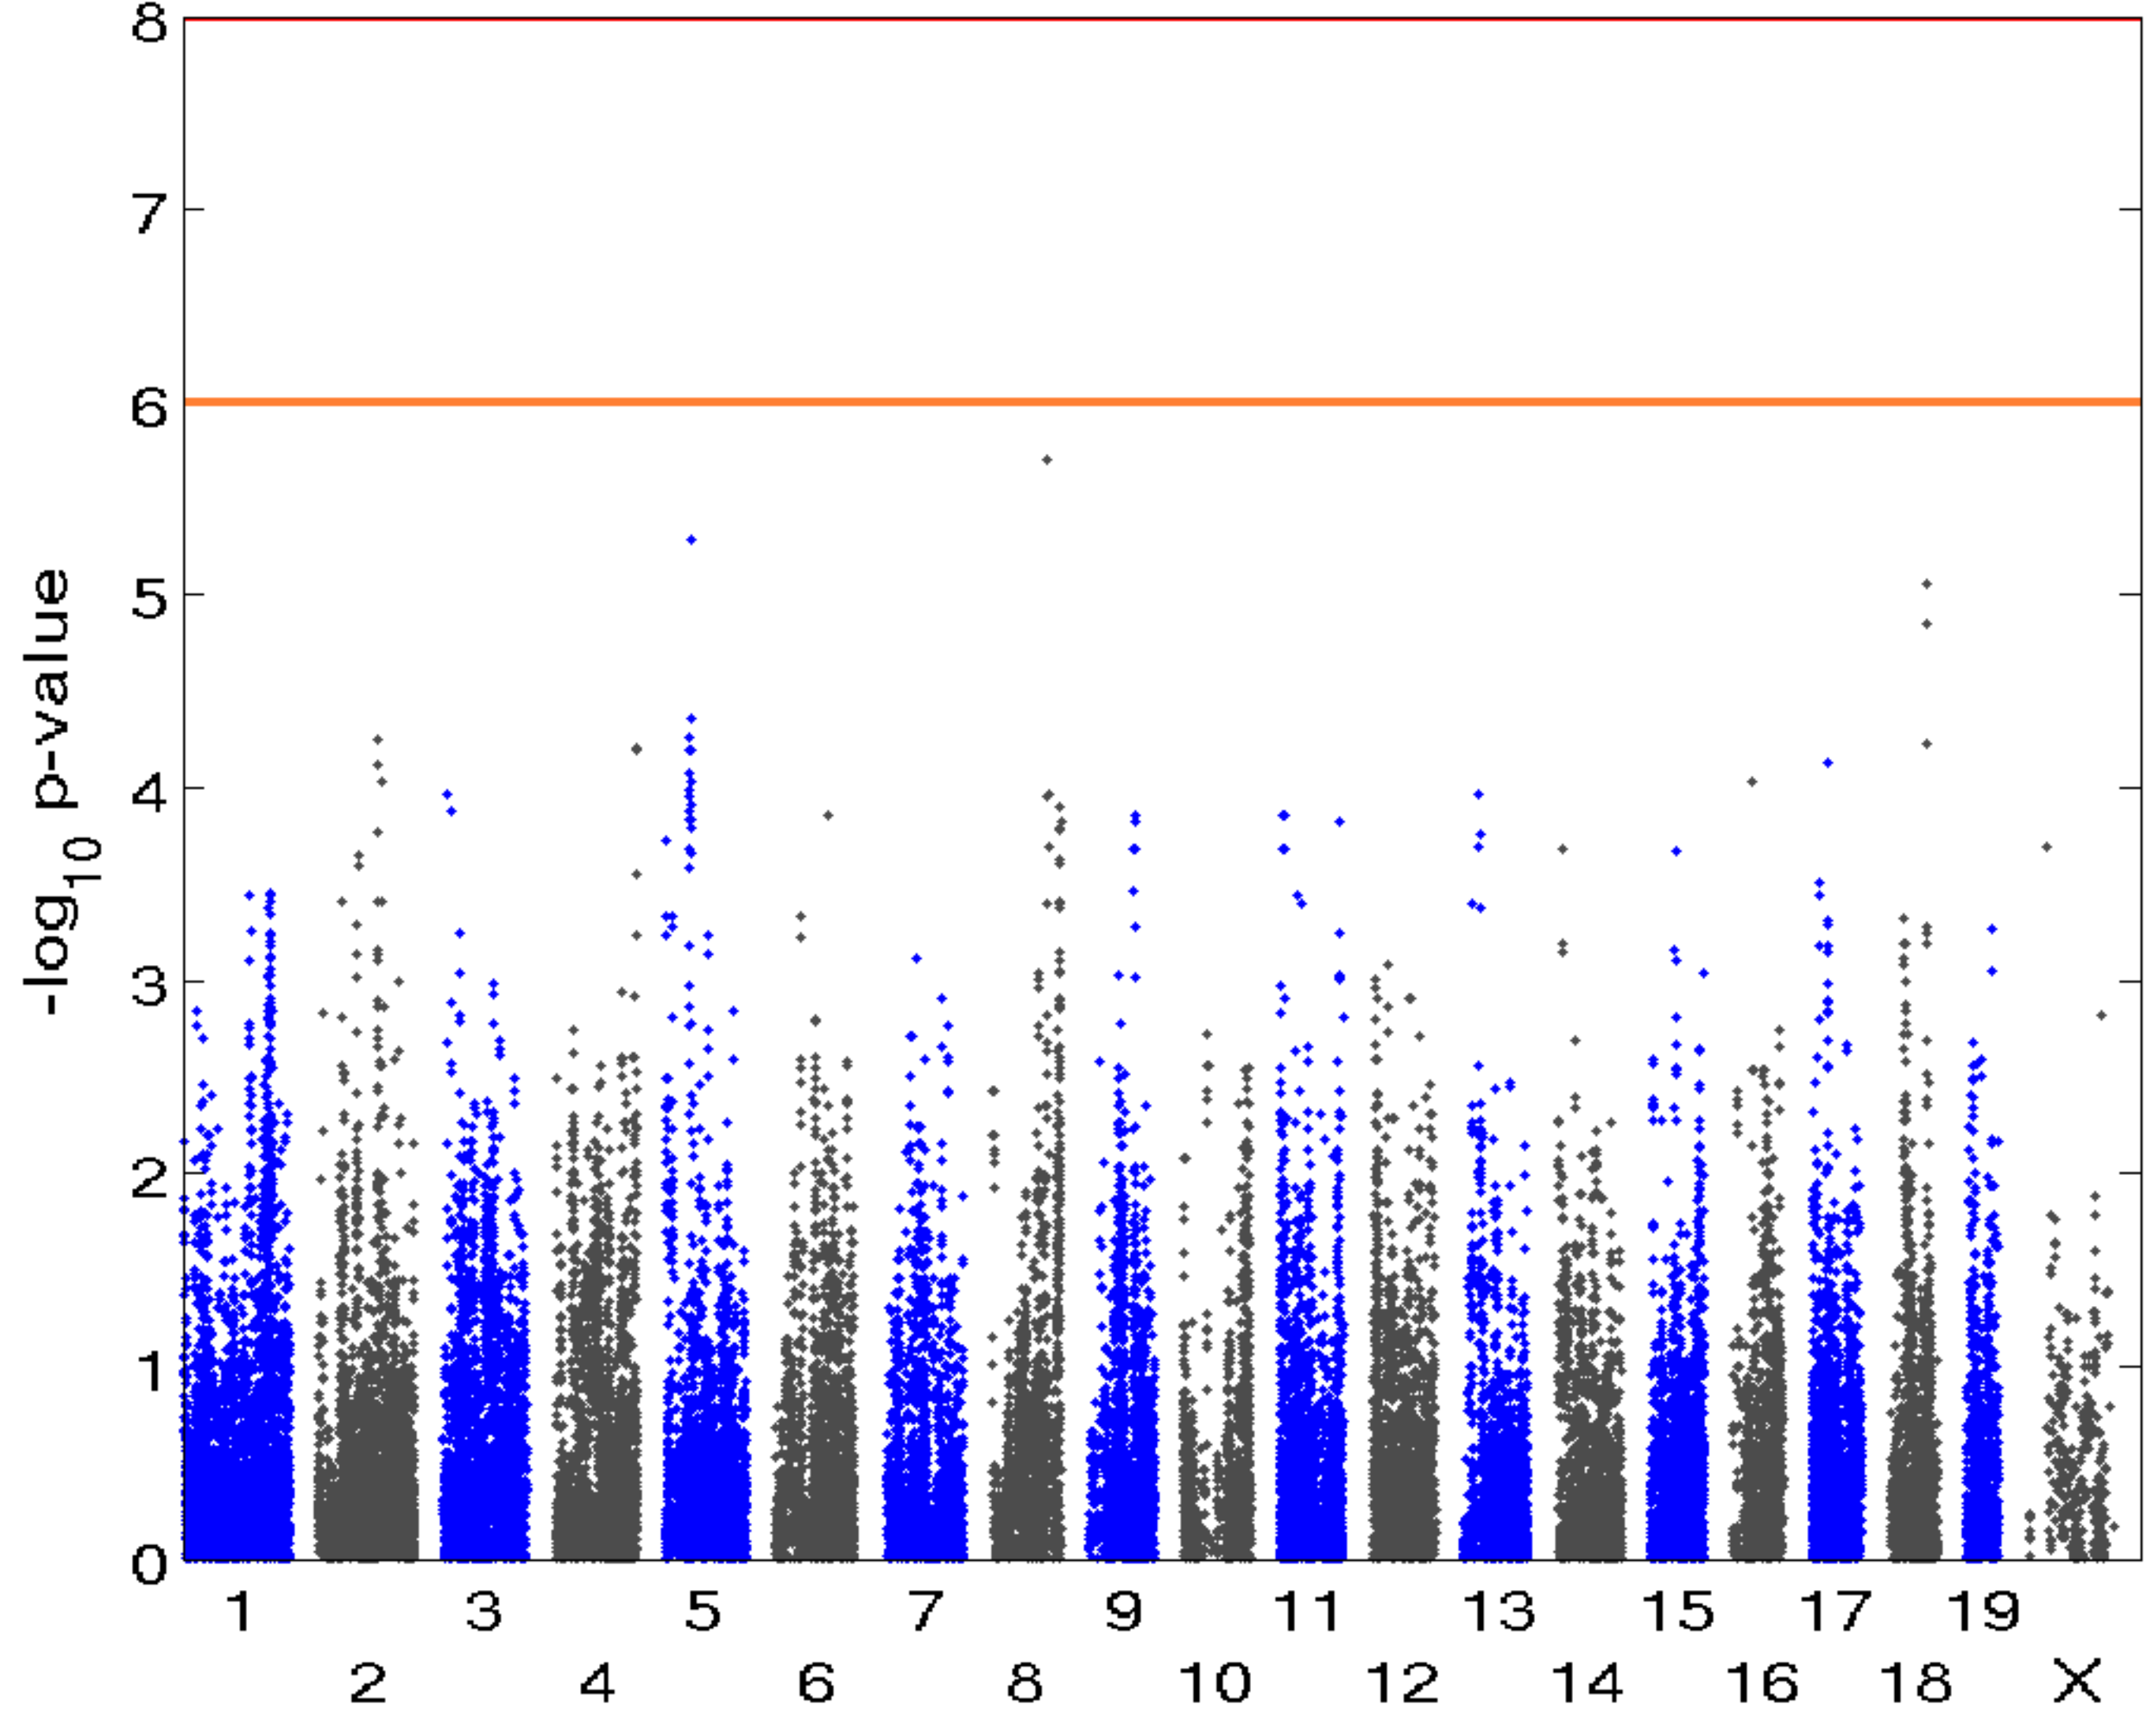

HR-TC - ctr

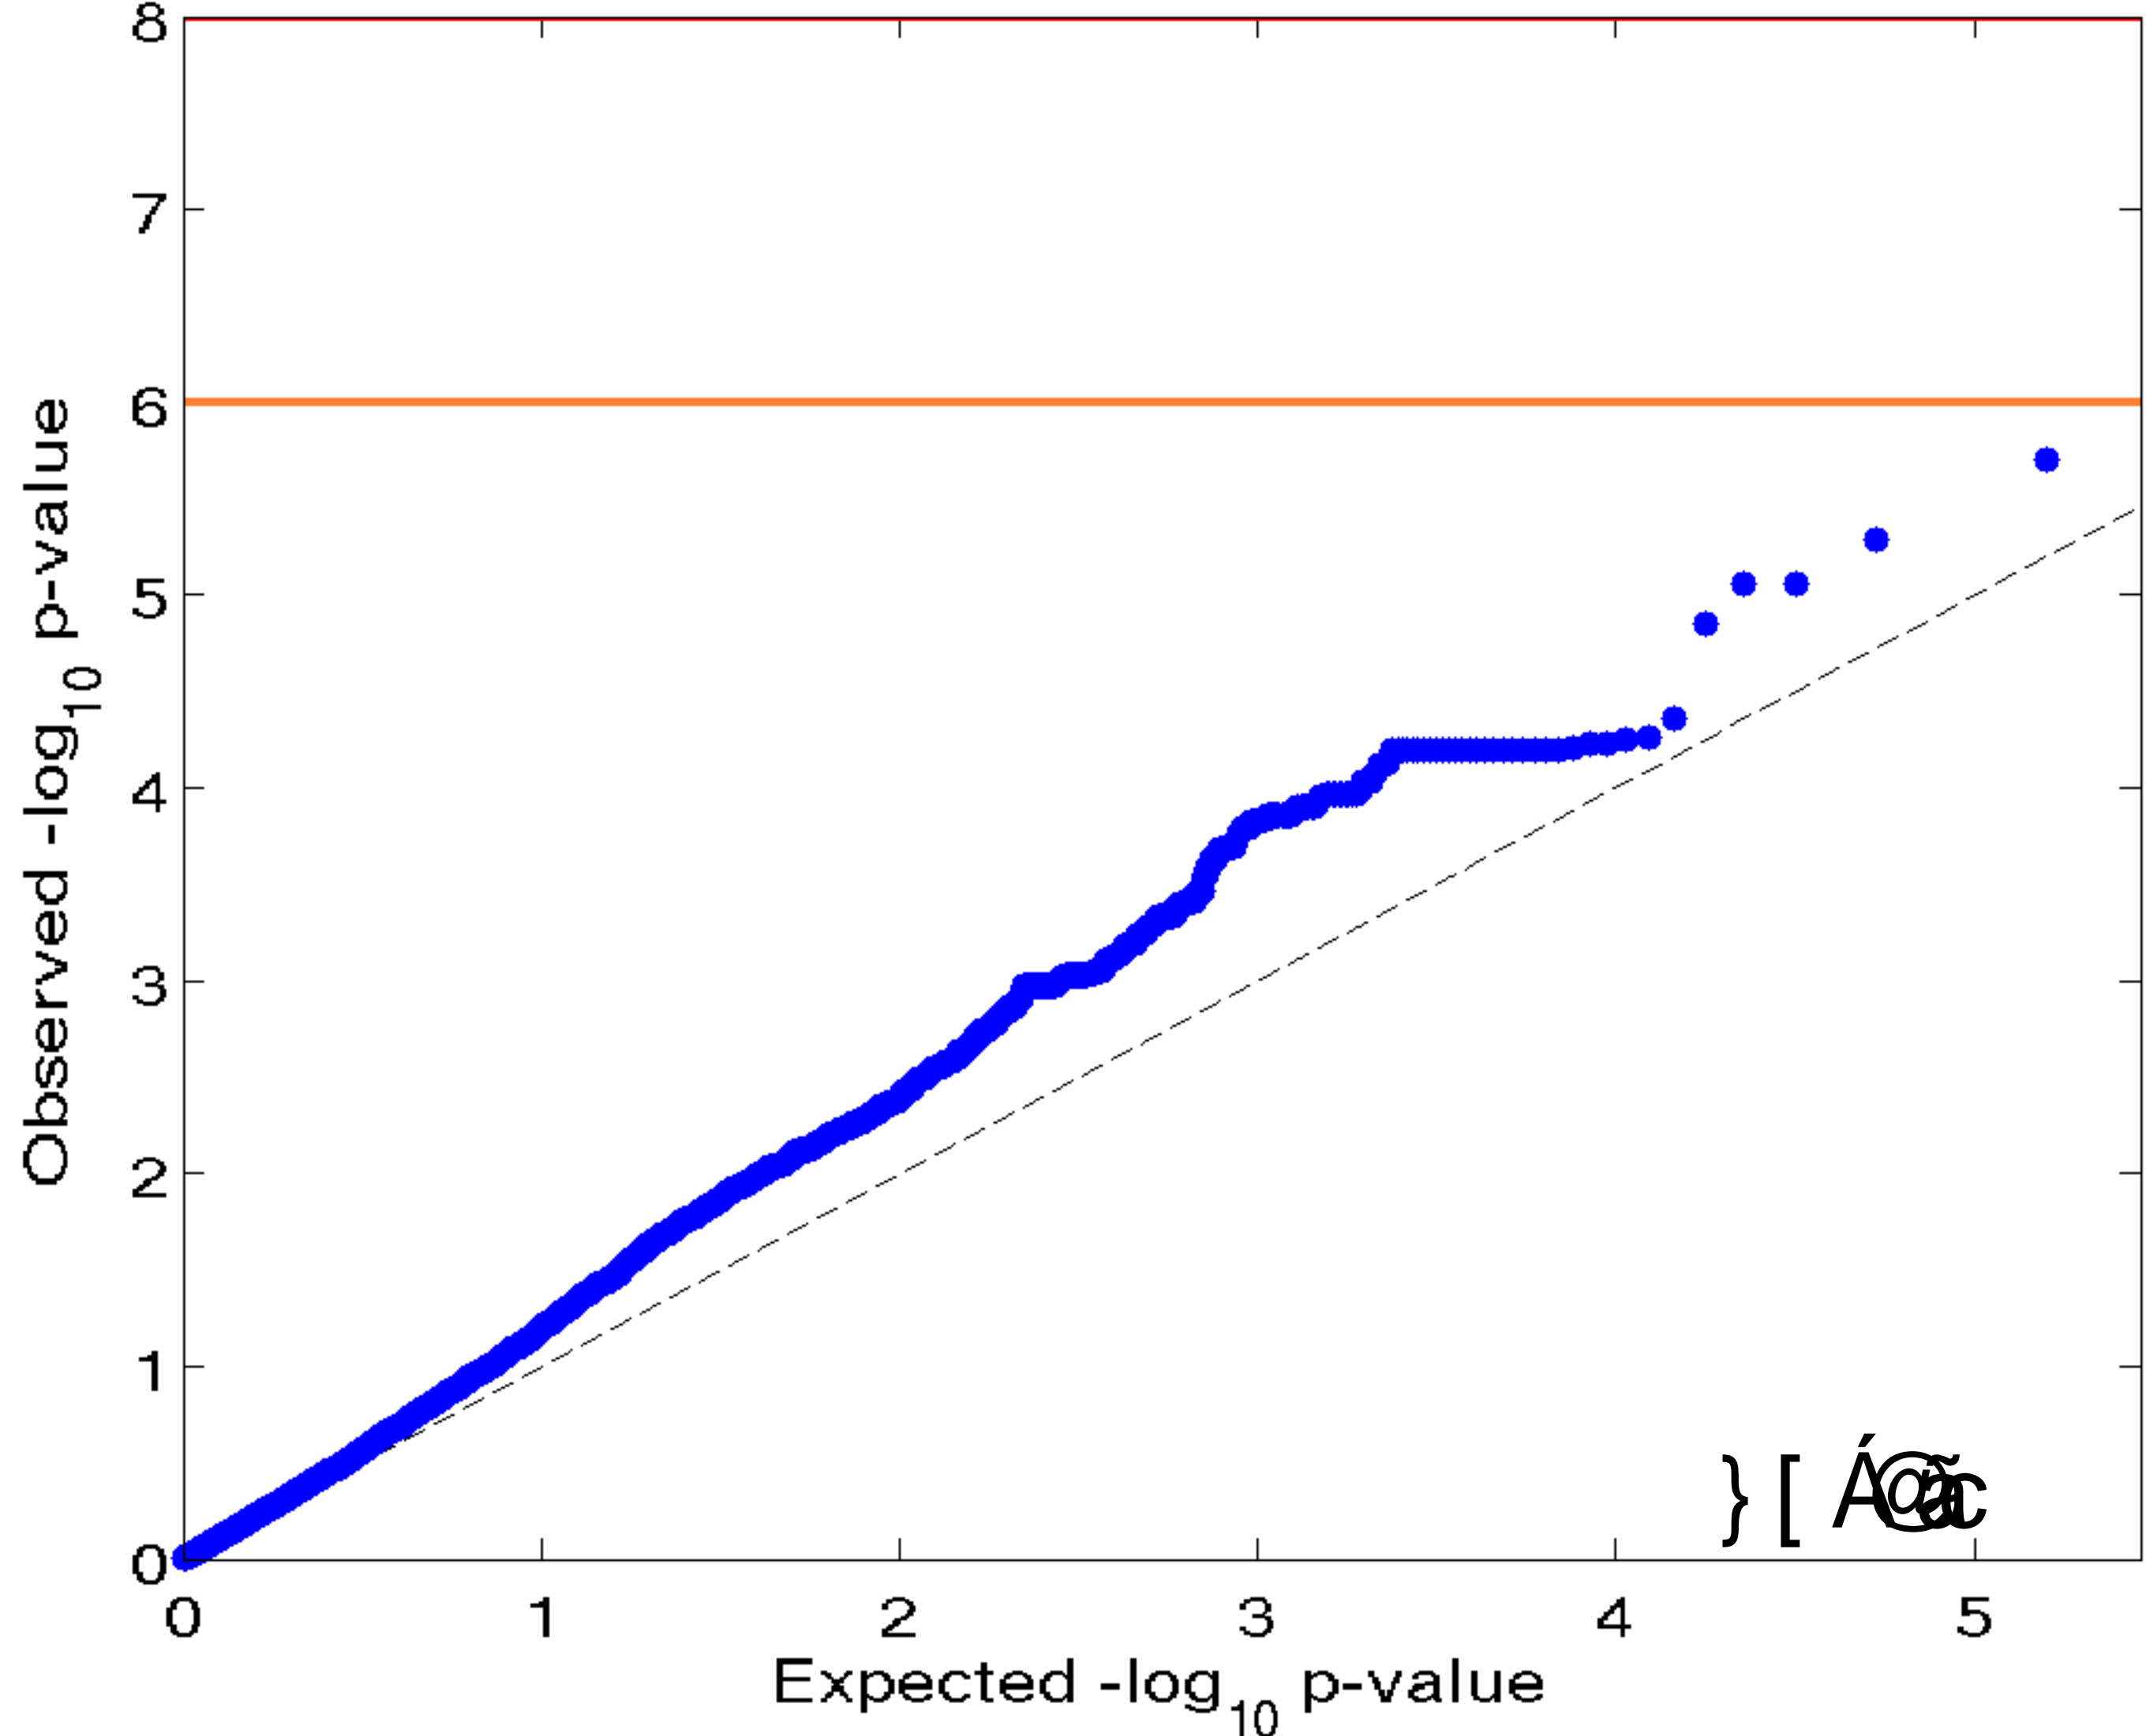



HW - ctr

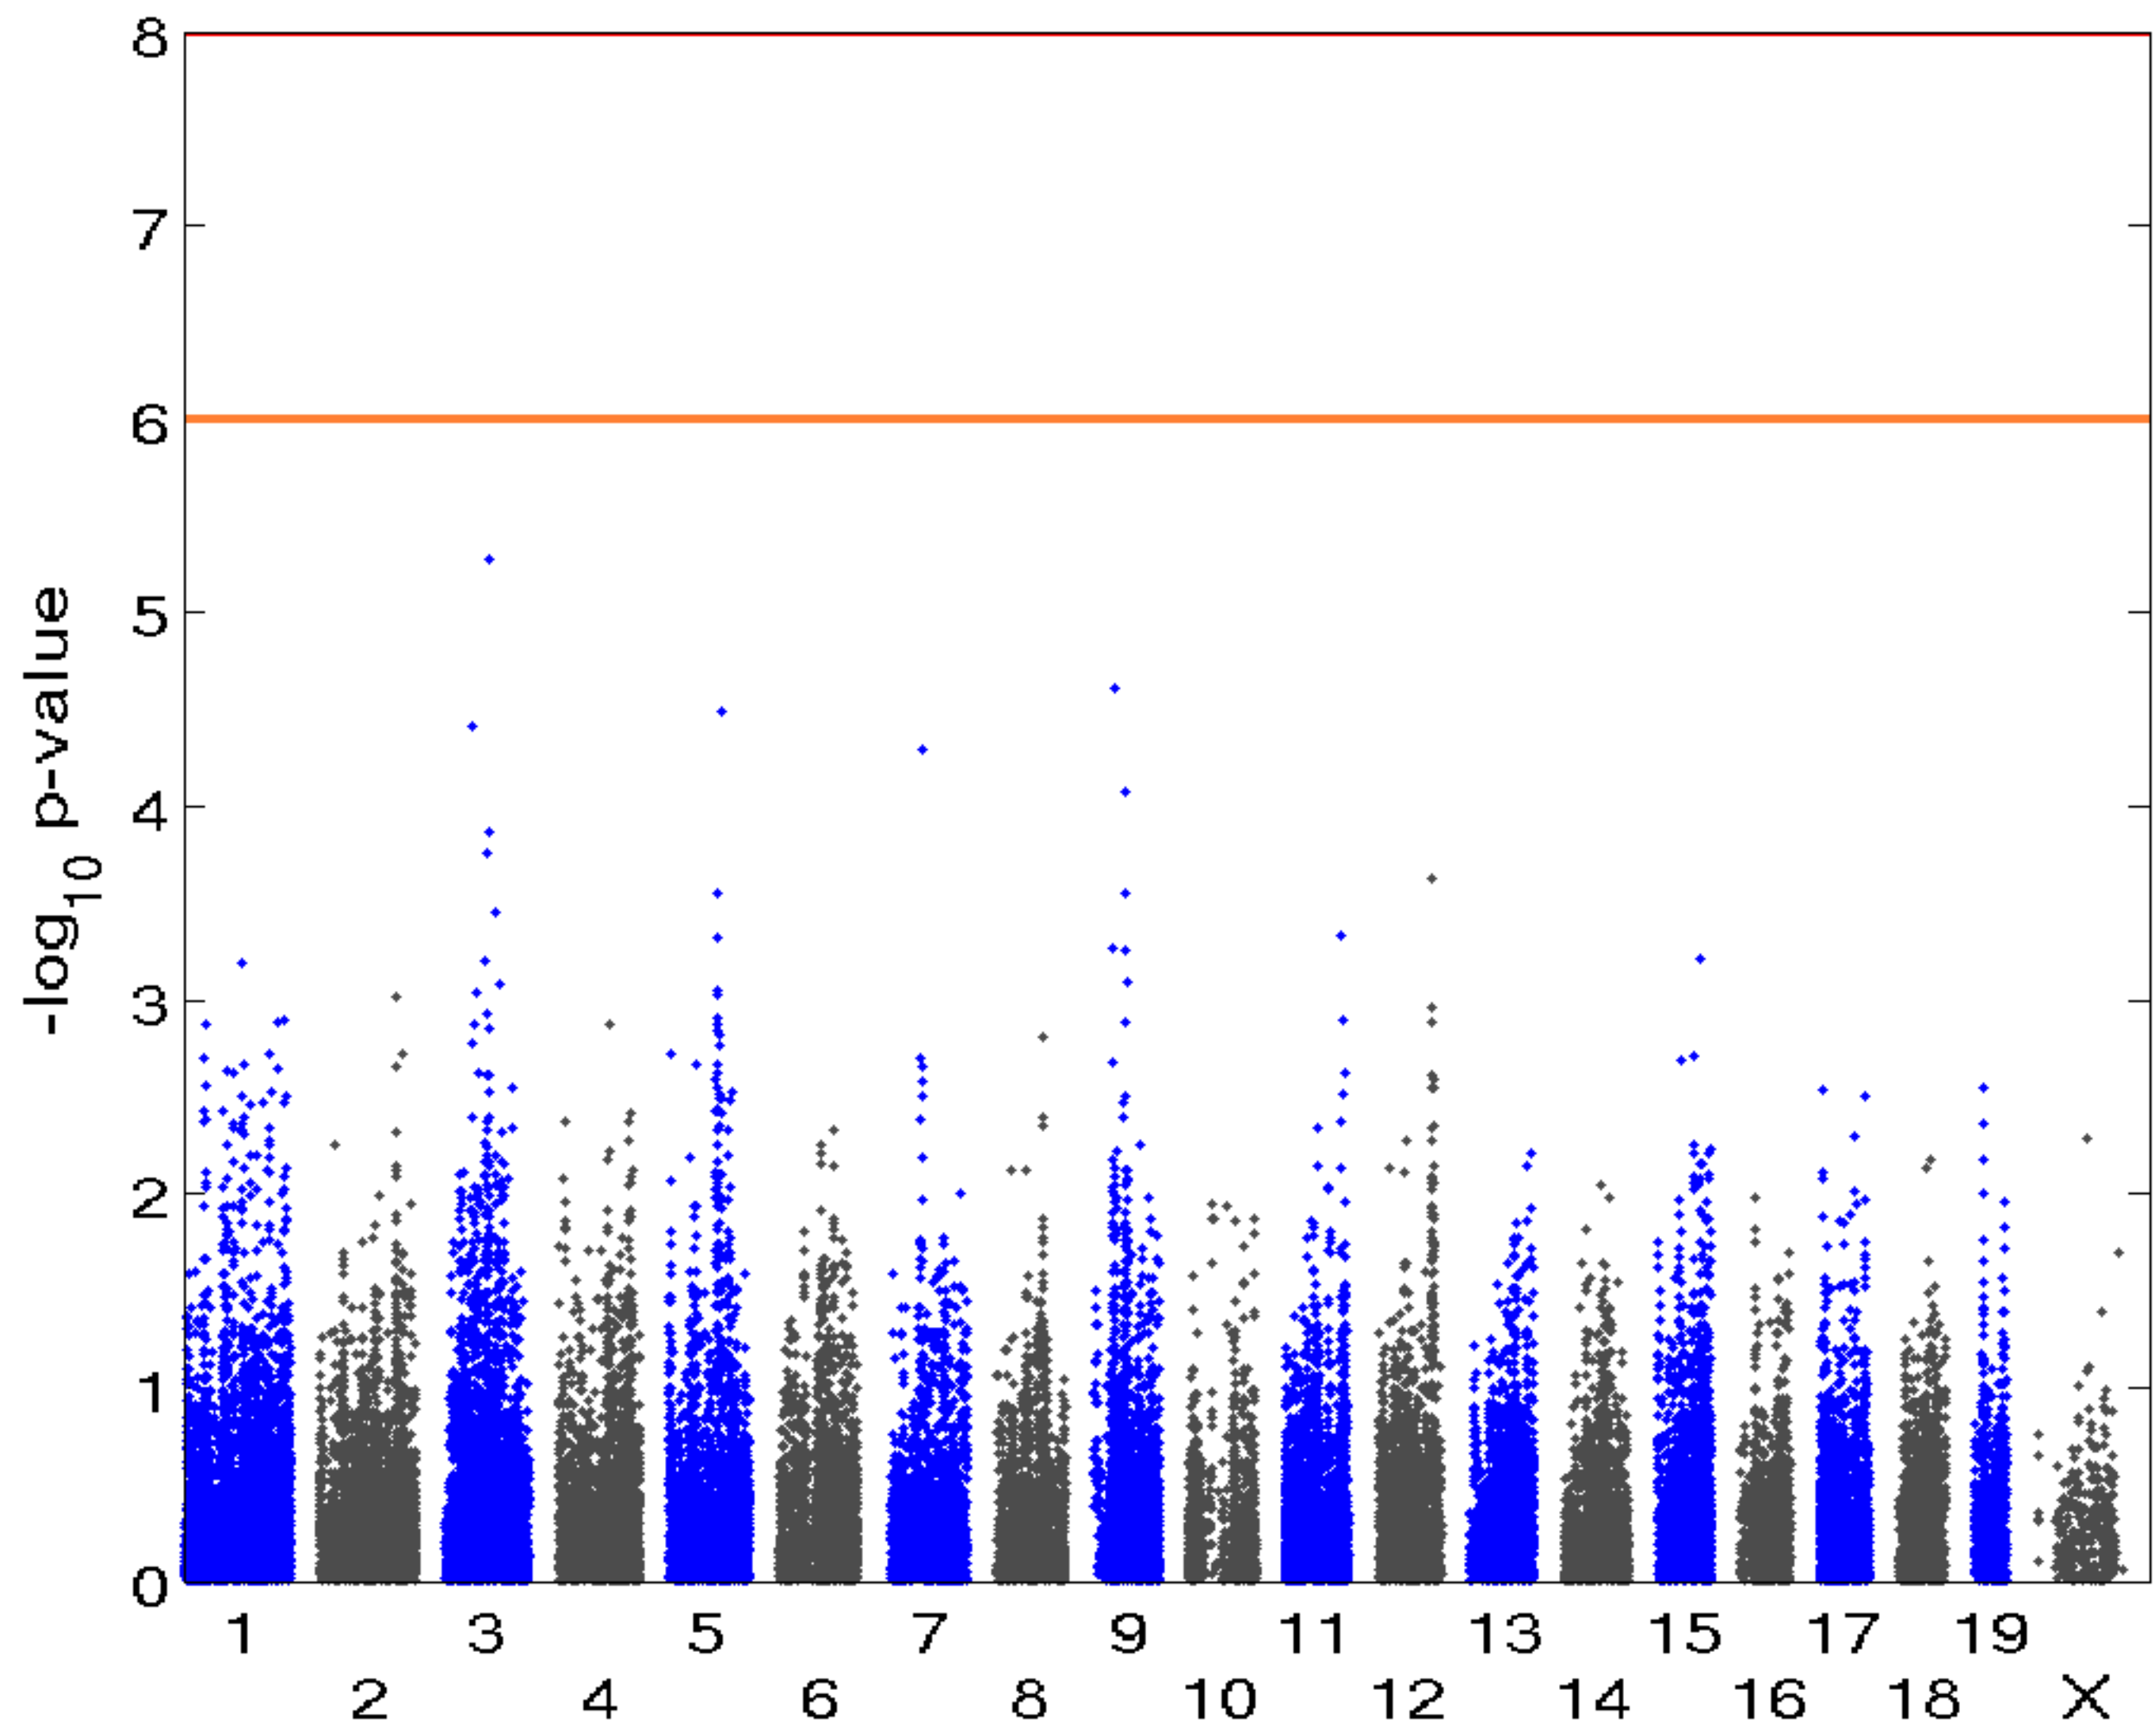

HW - ctr

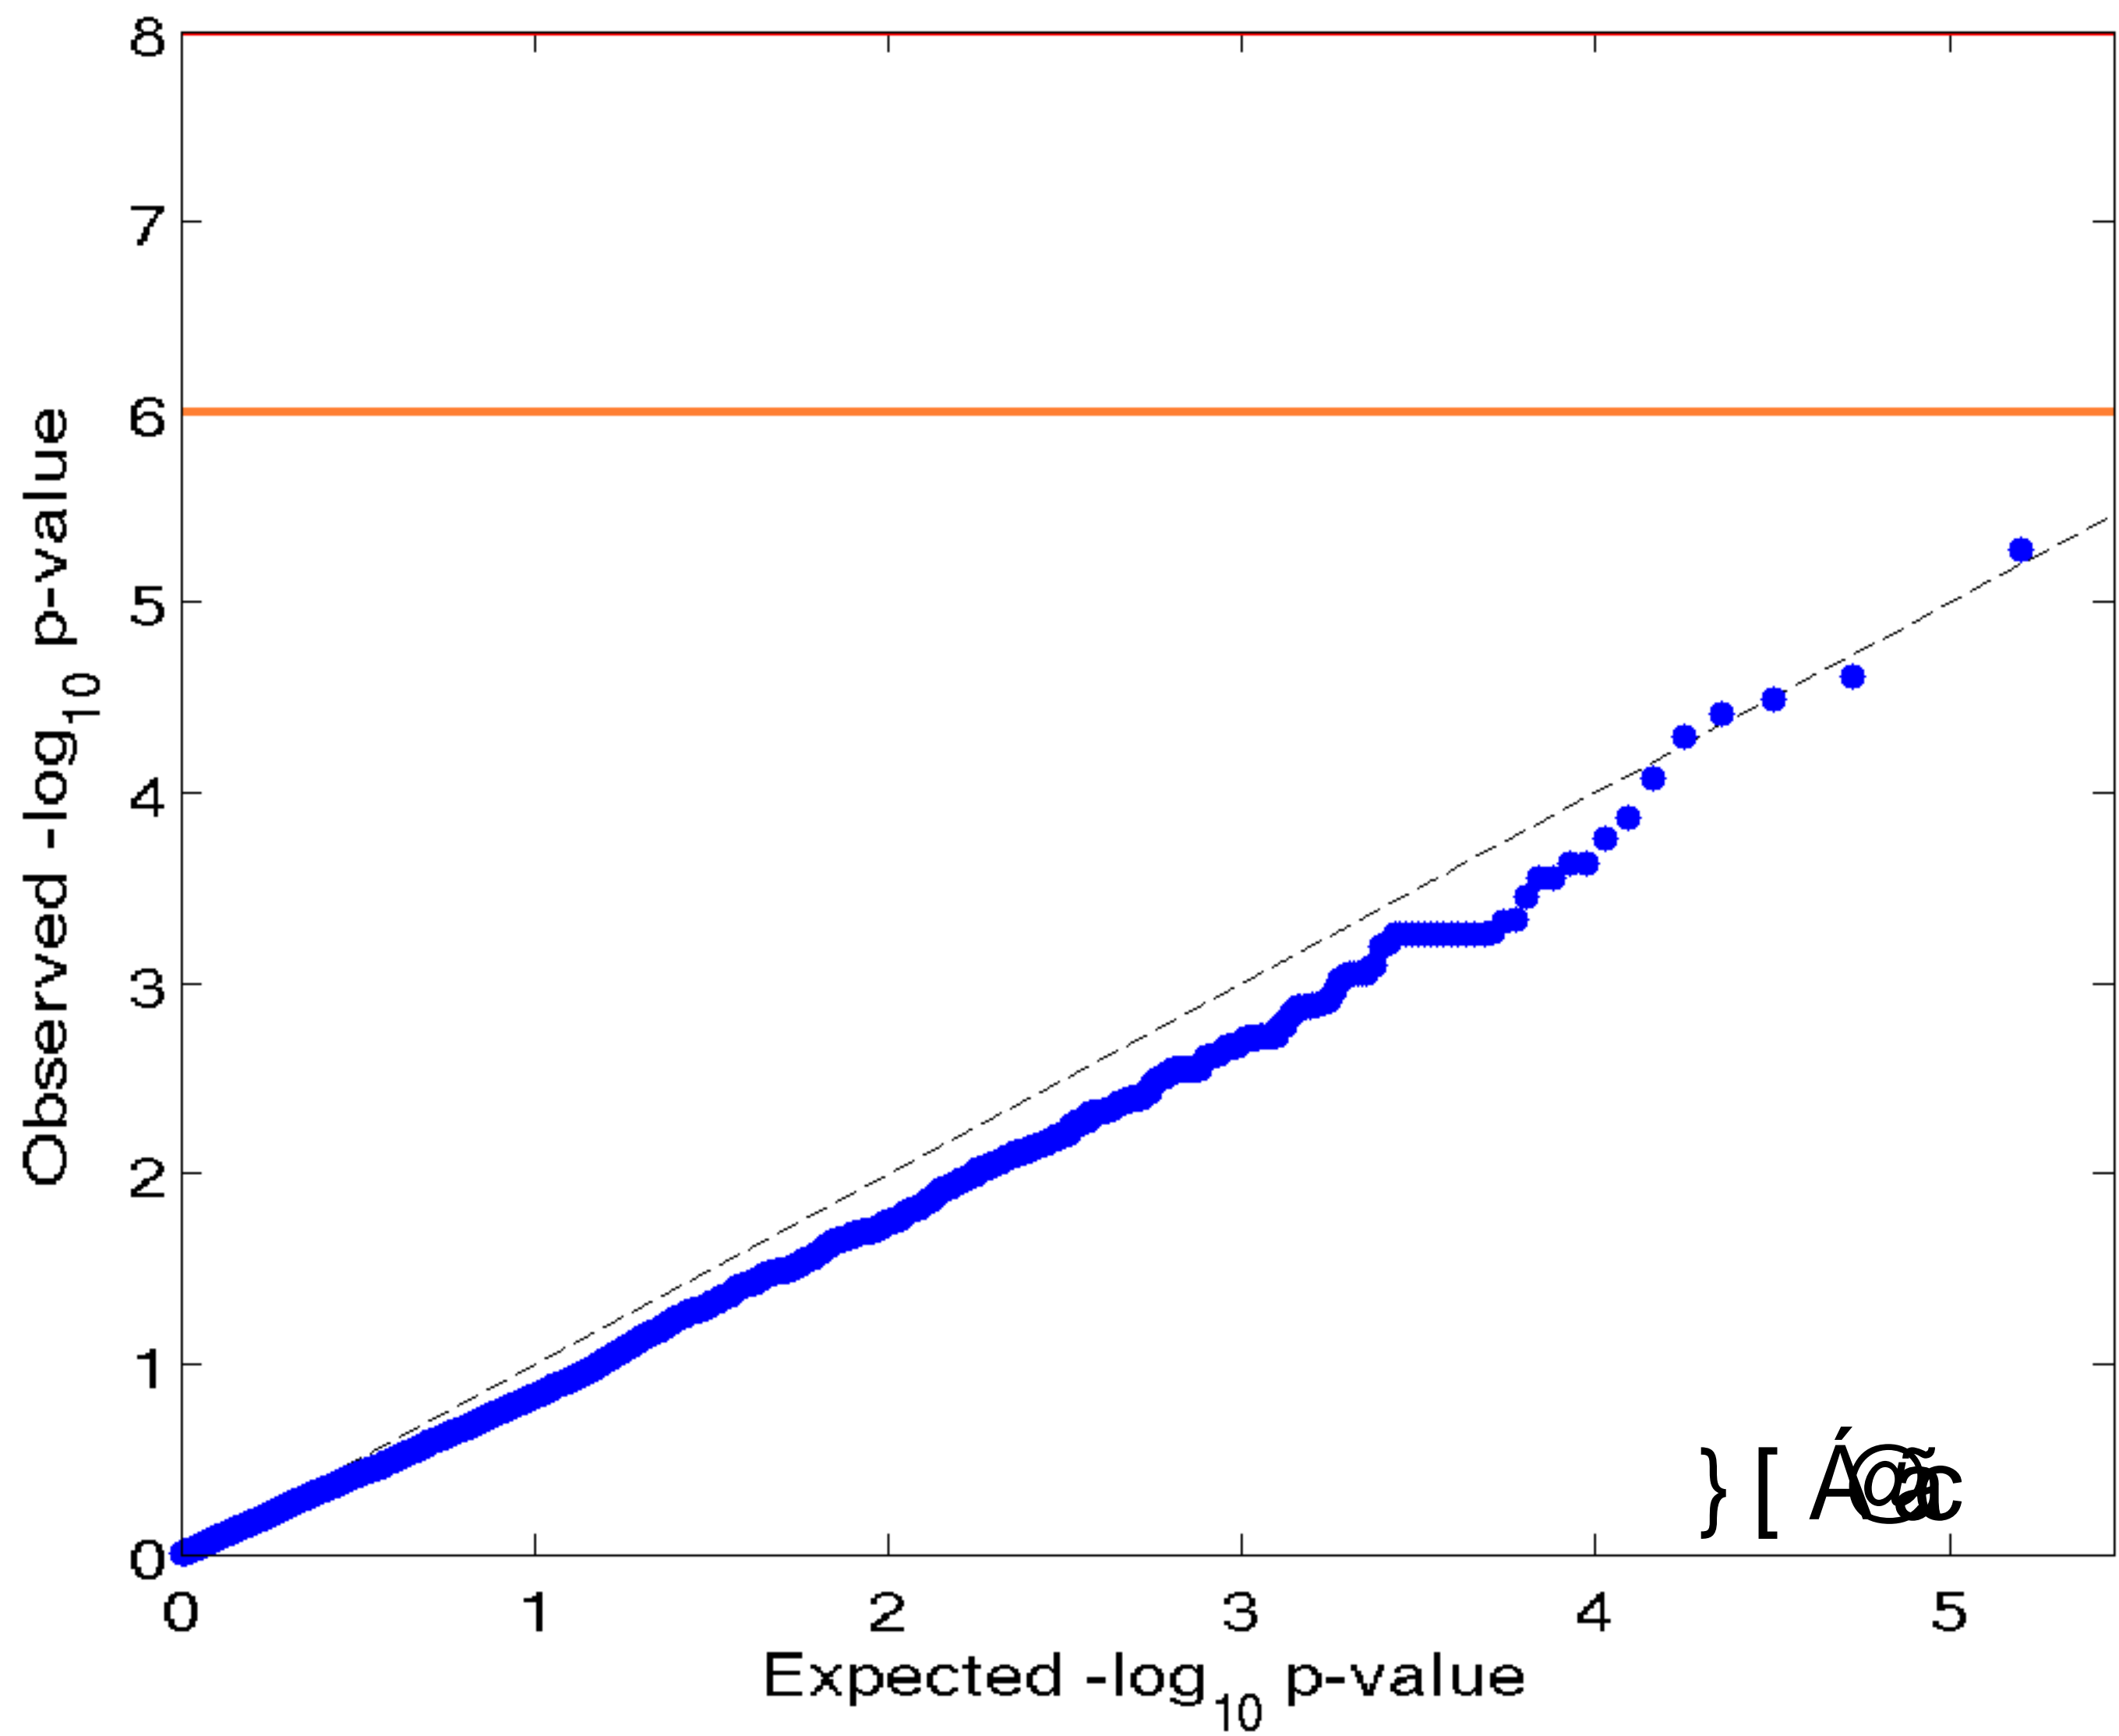

Pamp - ctr

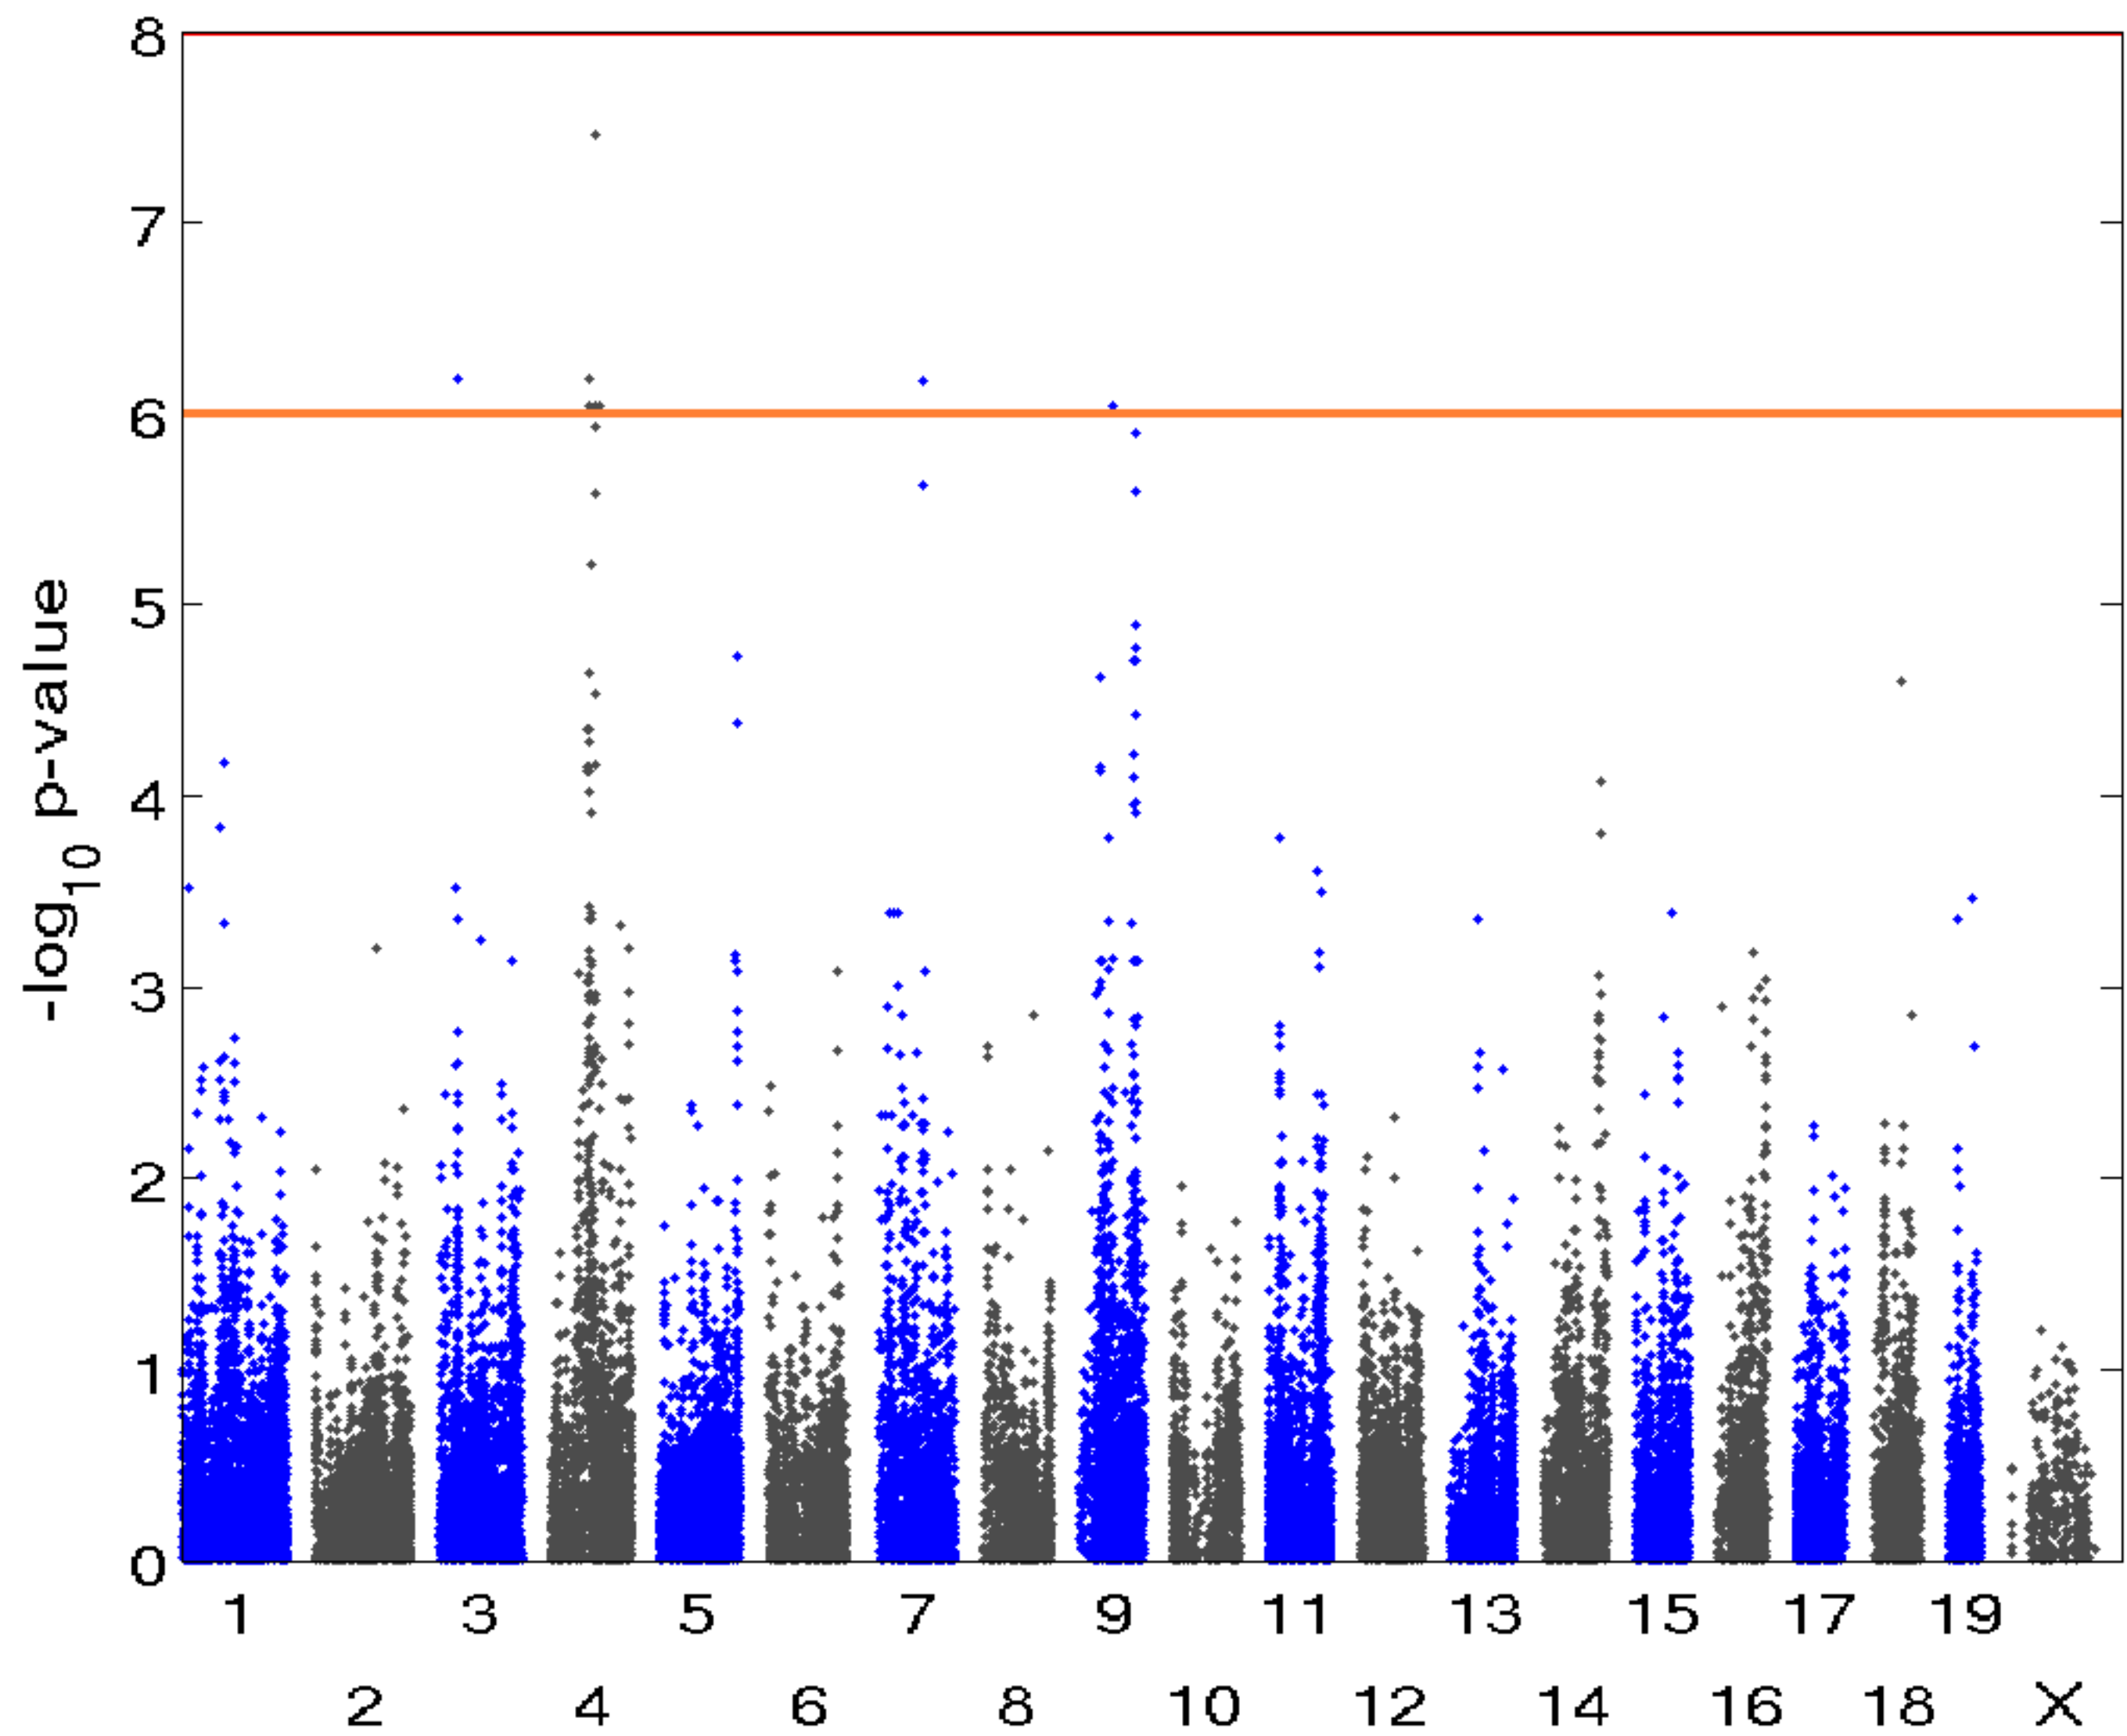

Pamp - ctr

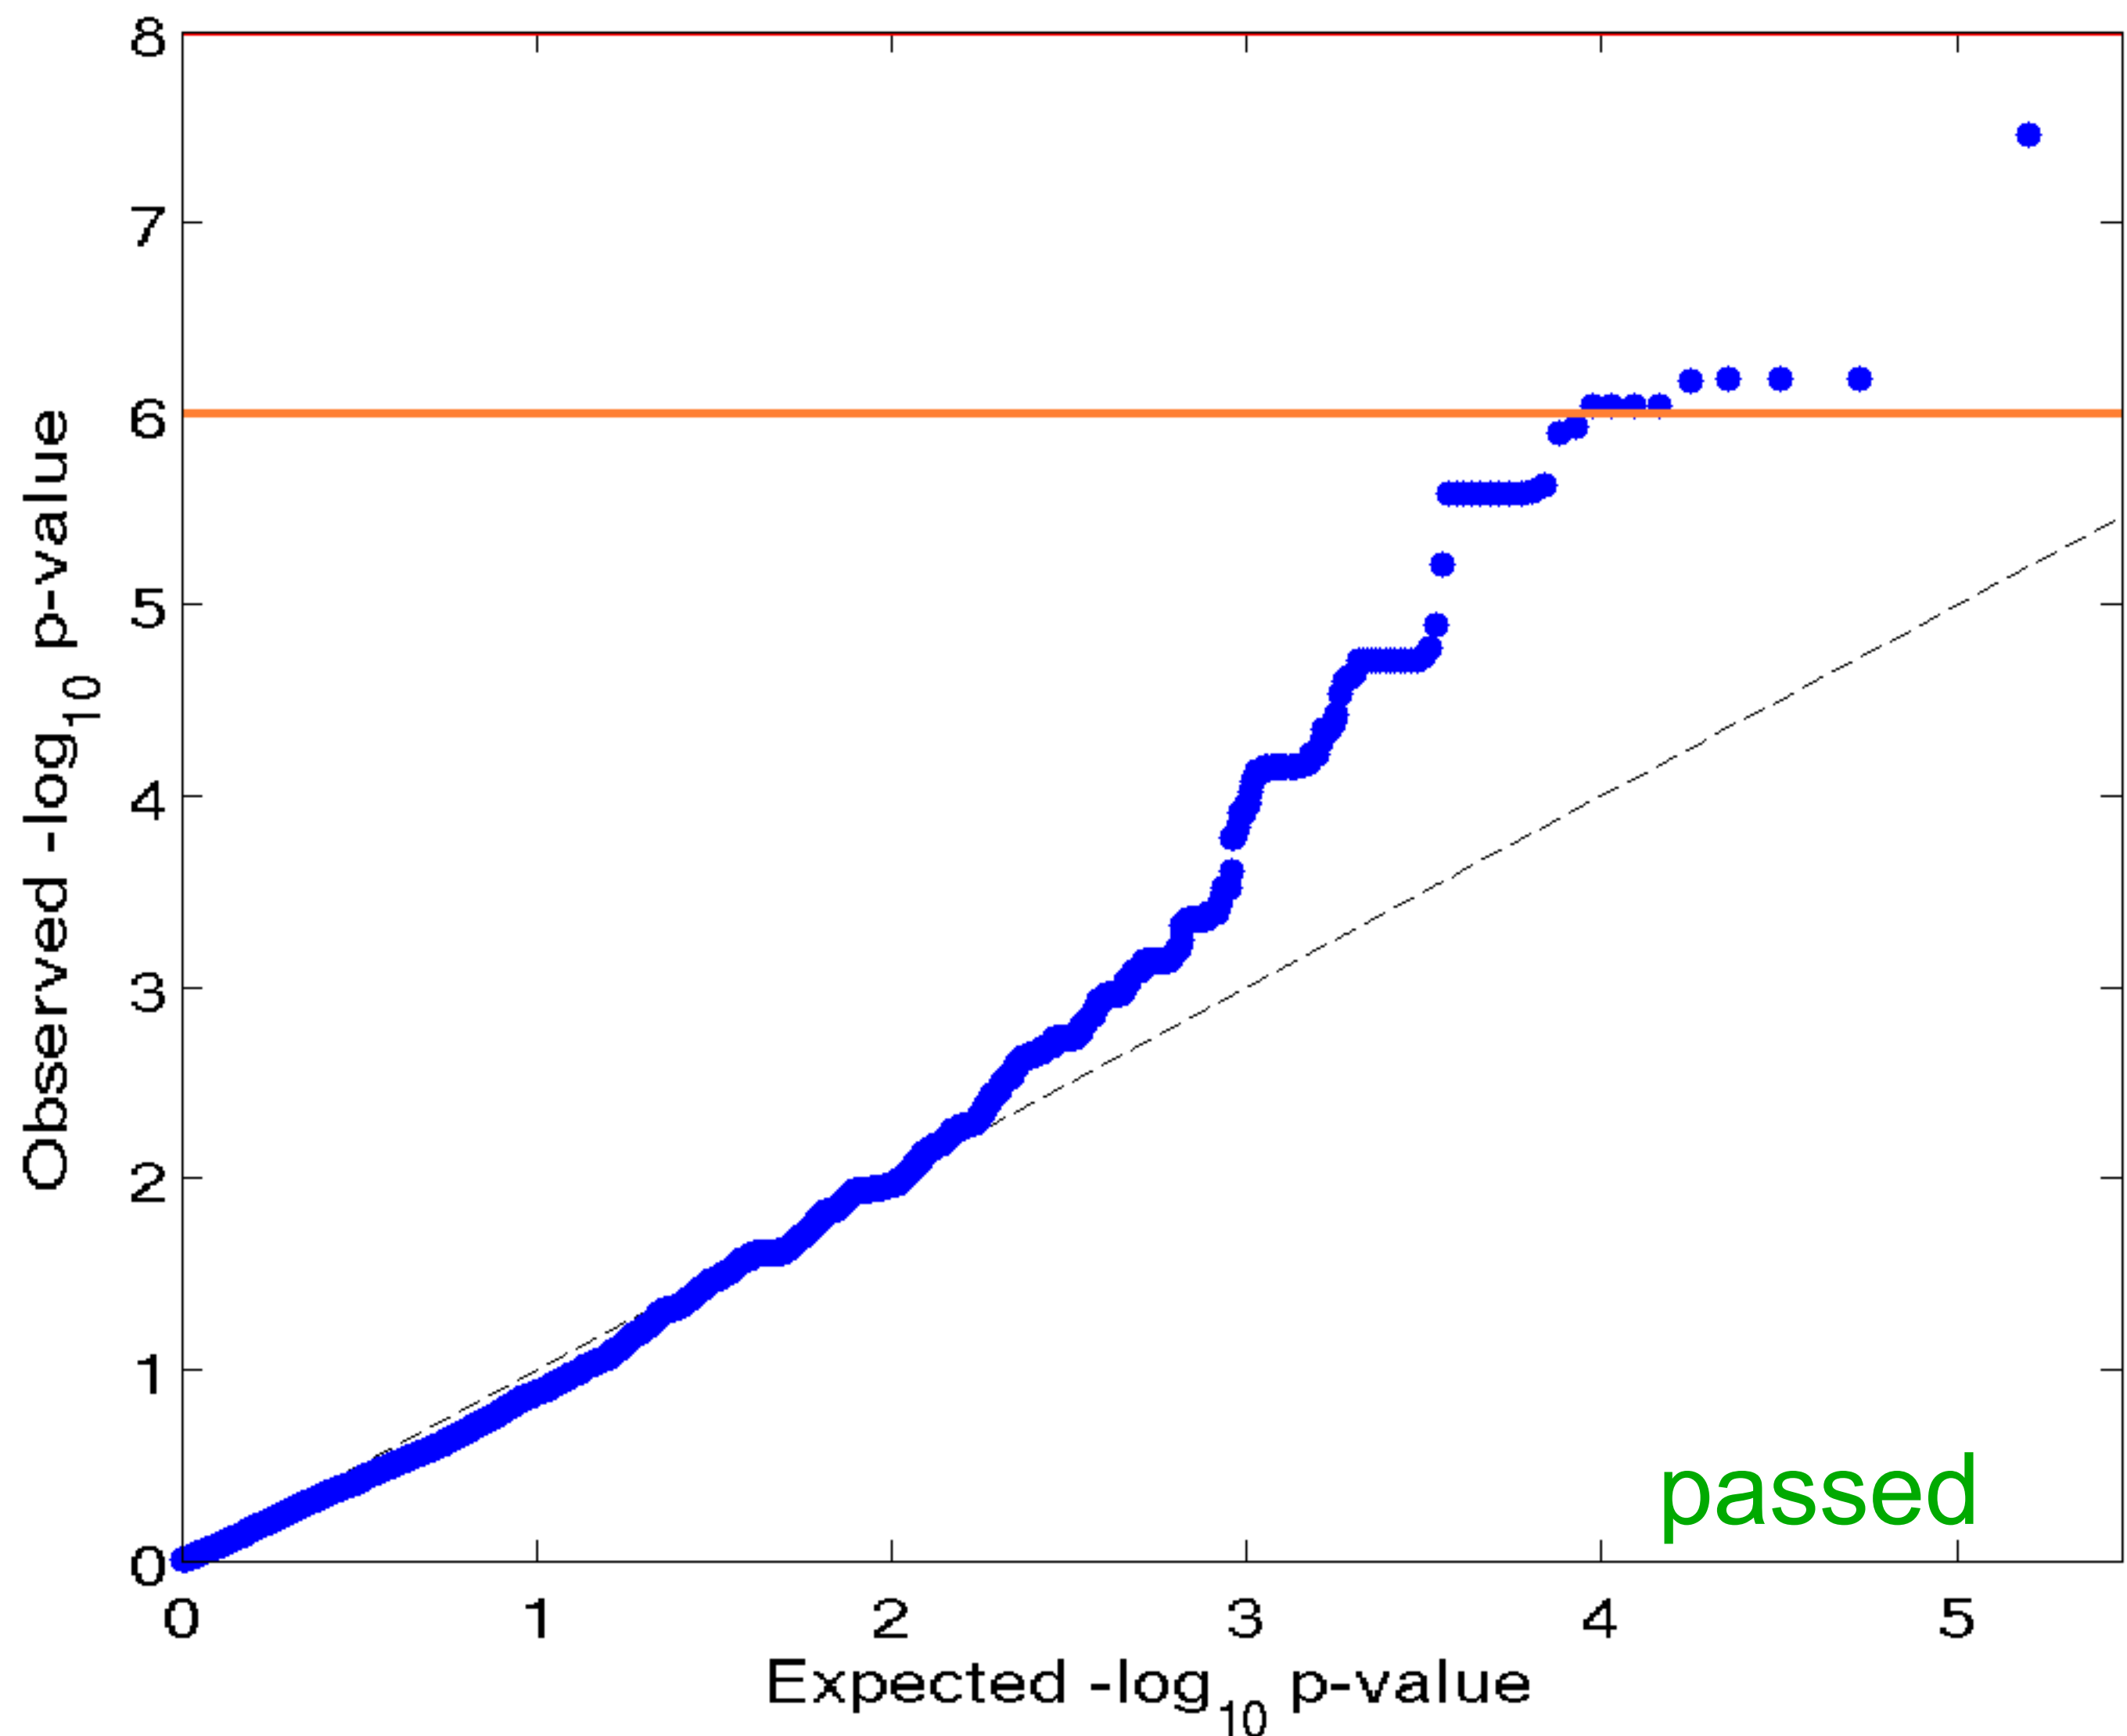

Parea - ctr

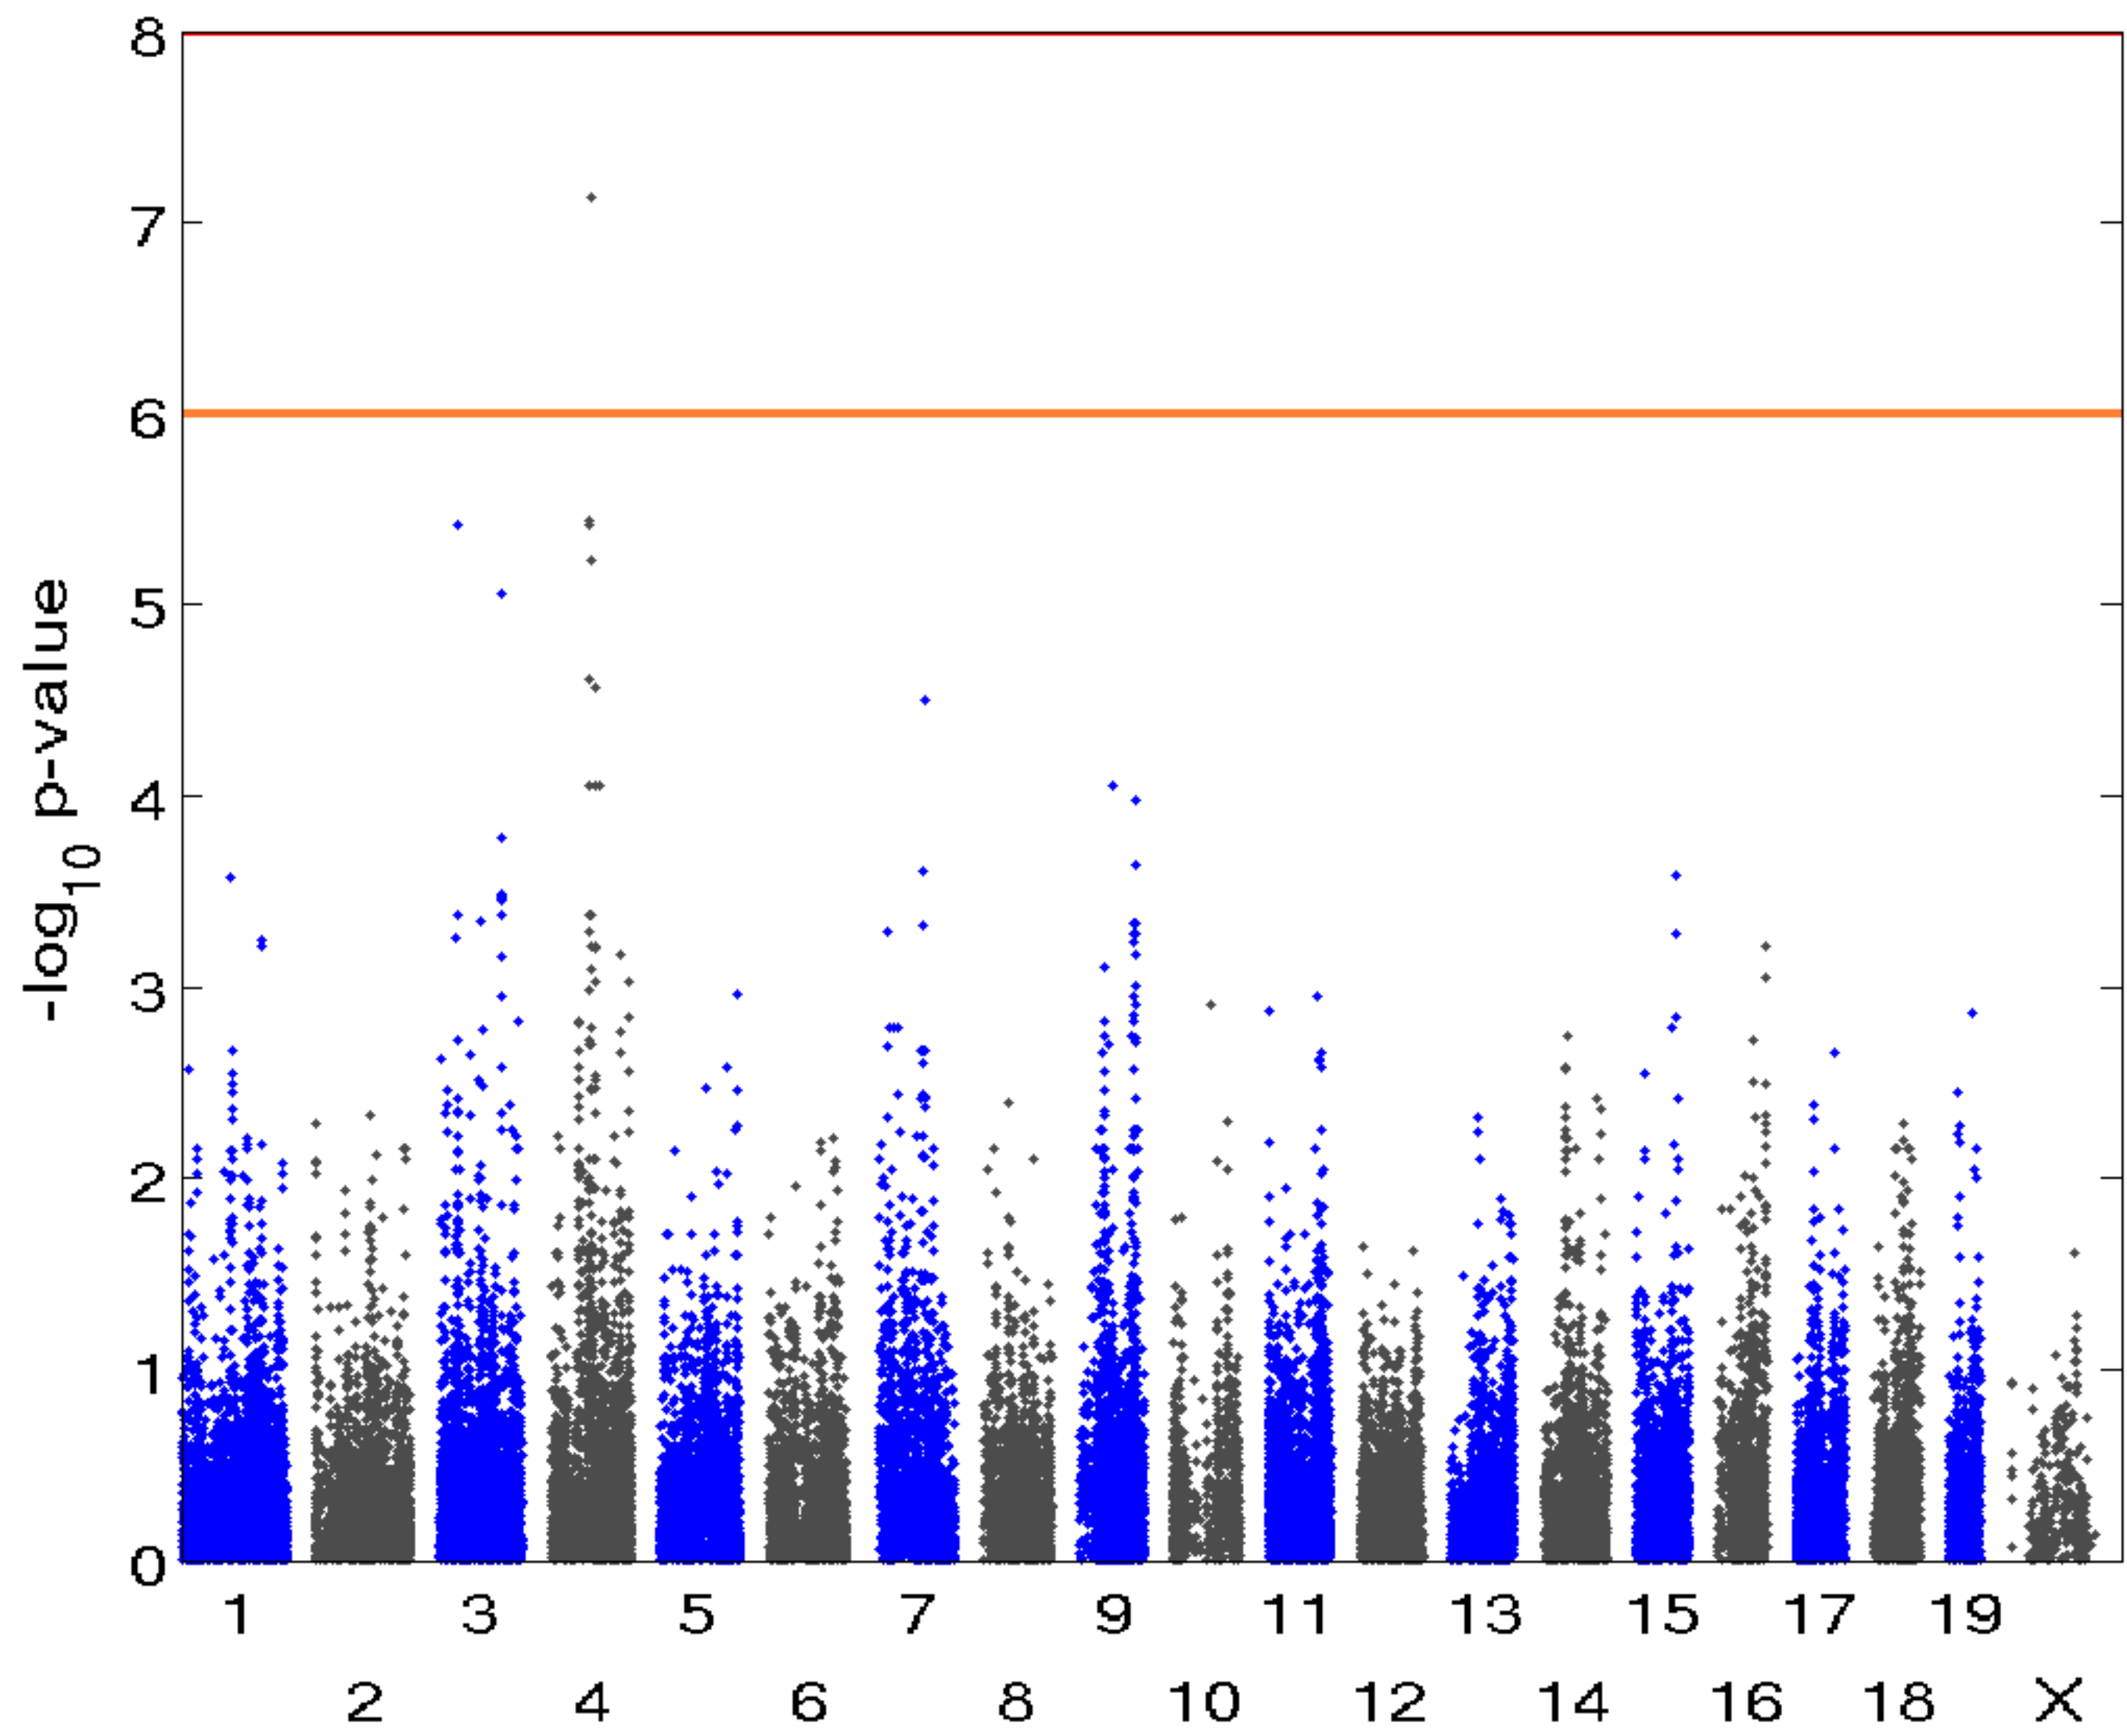

Parea - ctr

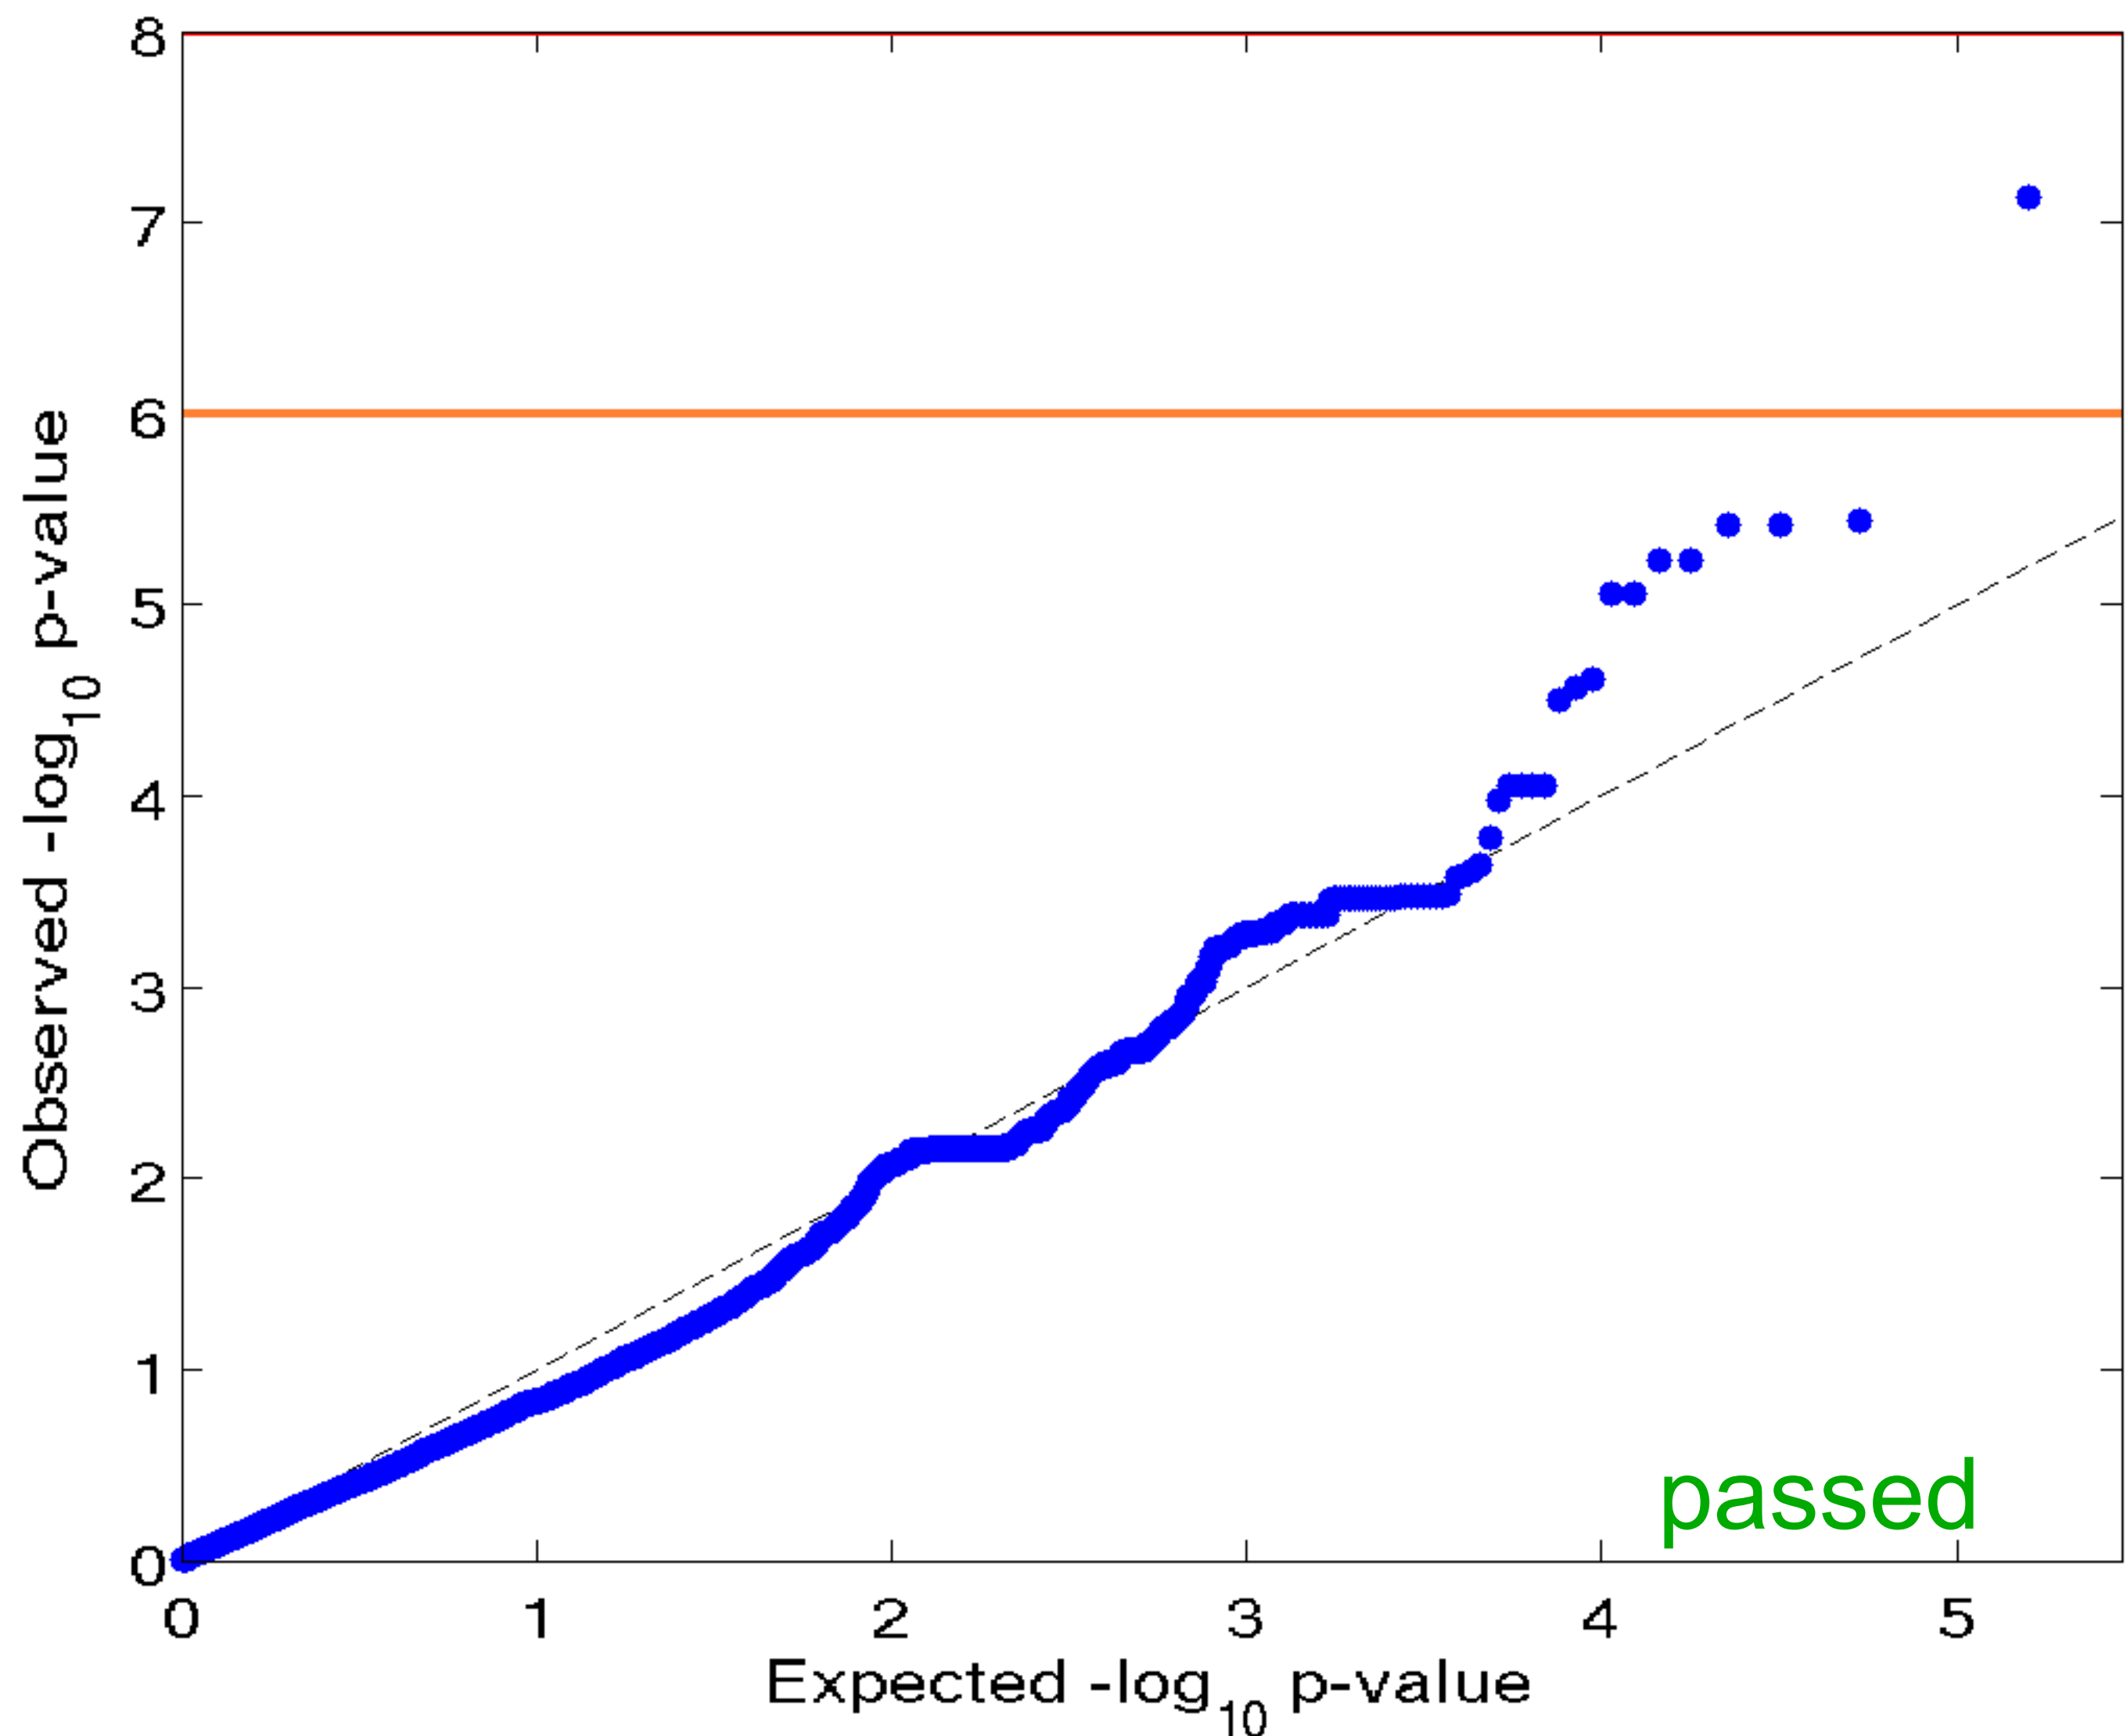

Pdur - ctr

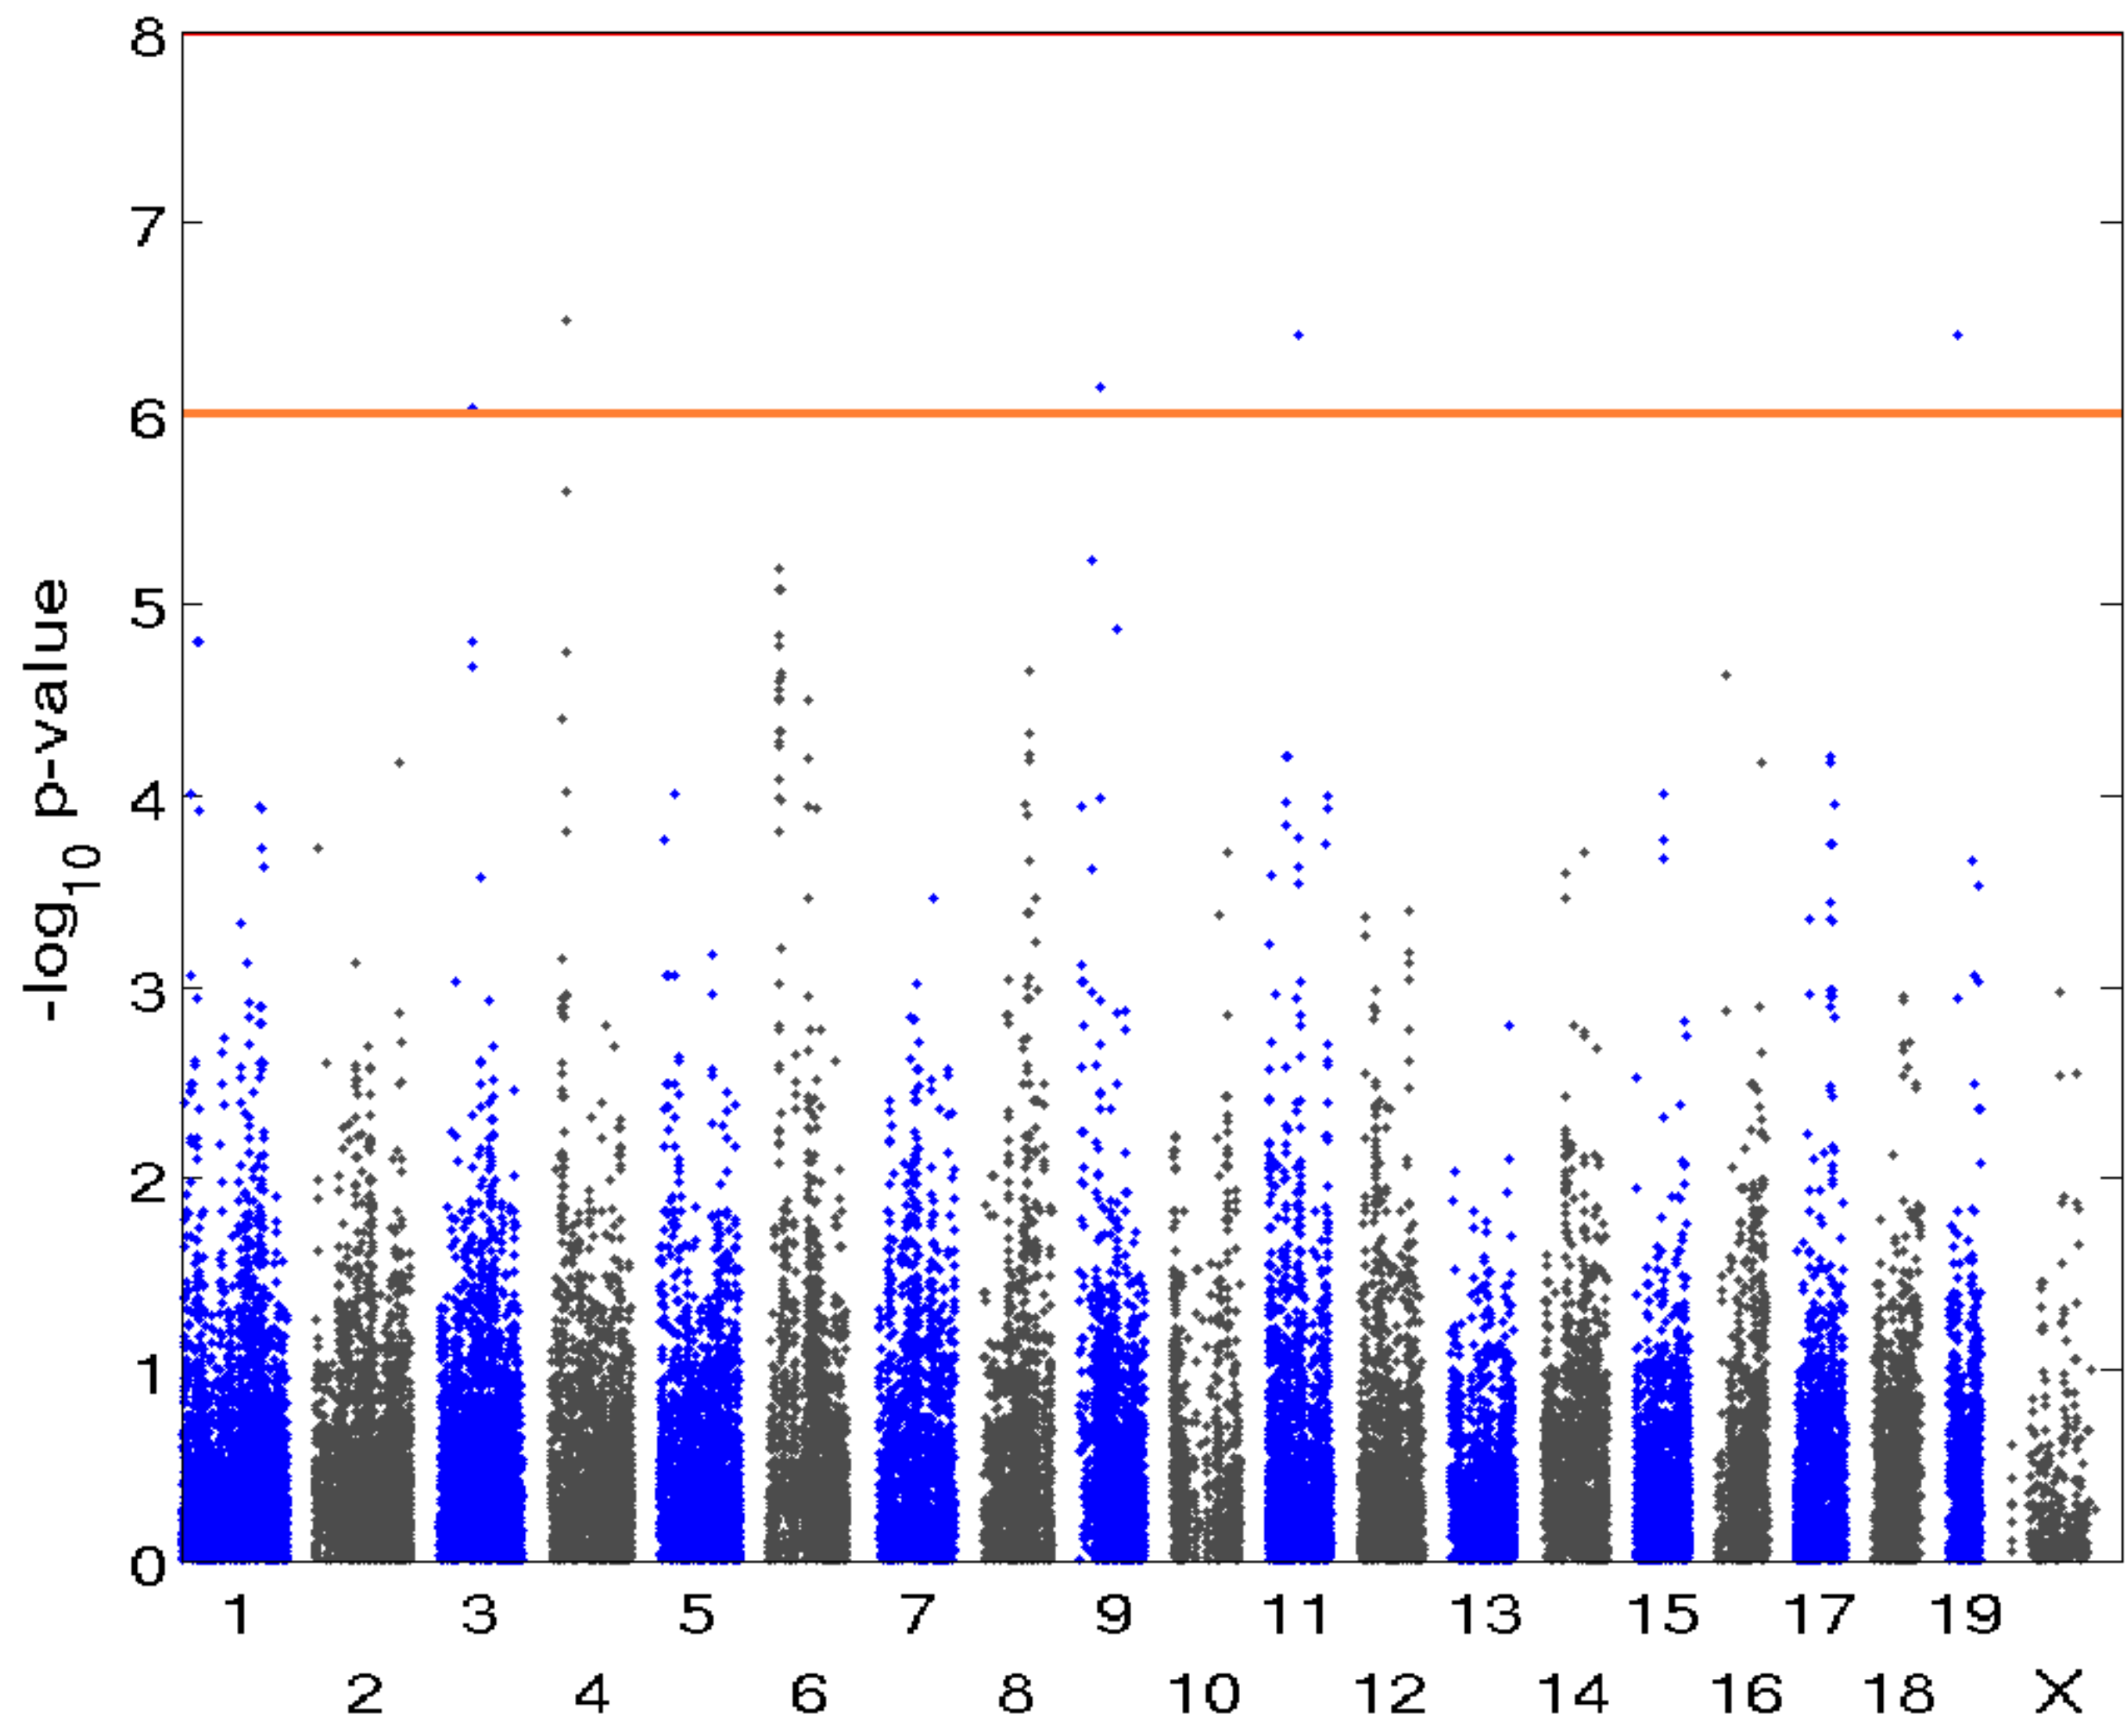

Pdur - ctr

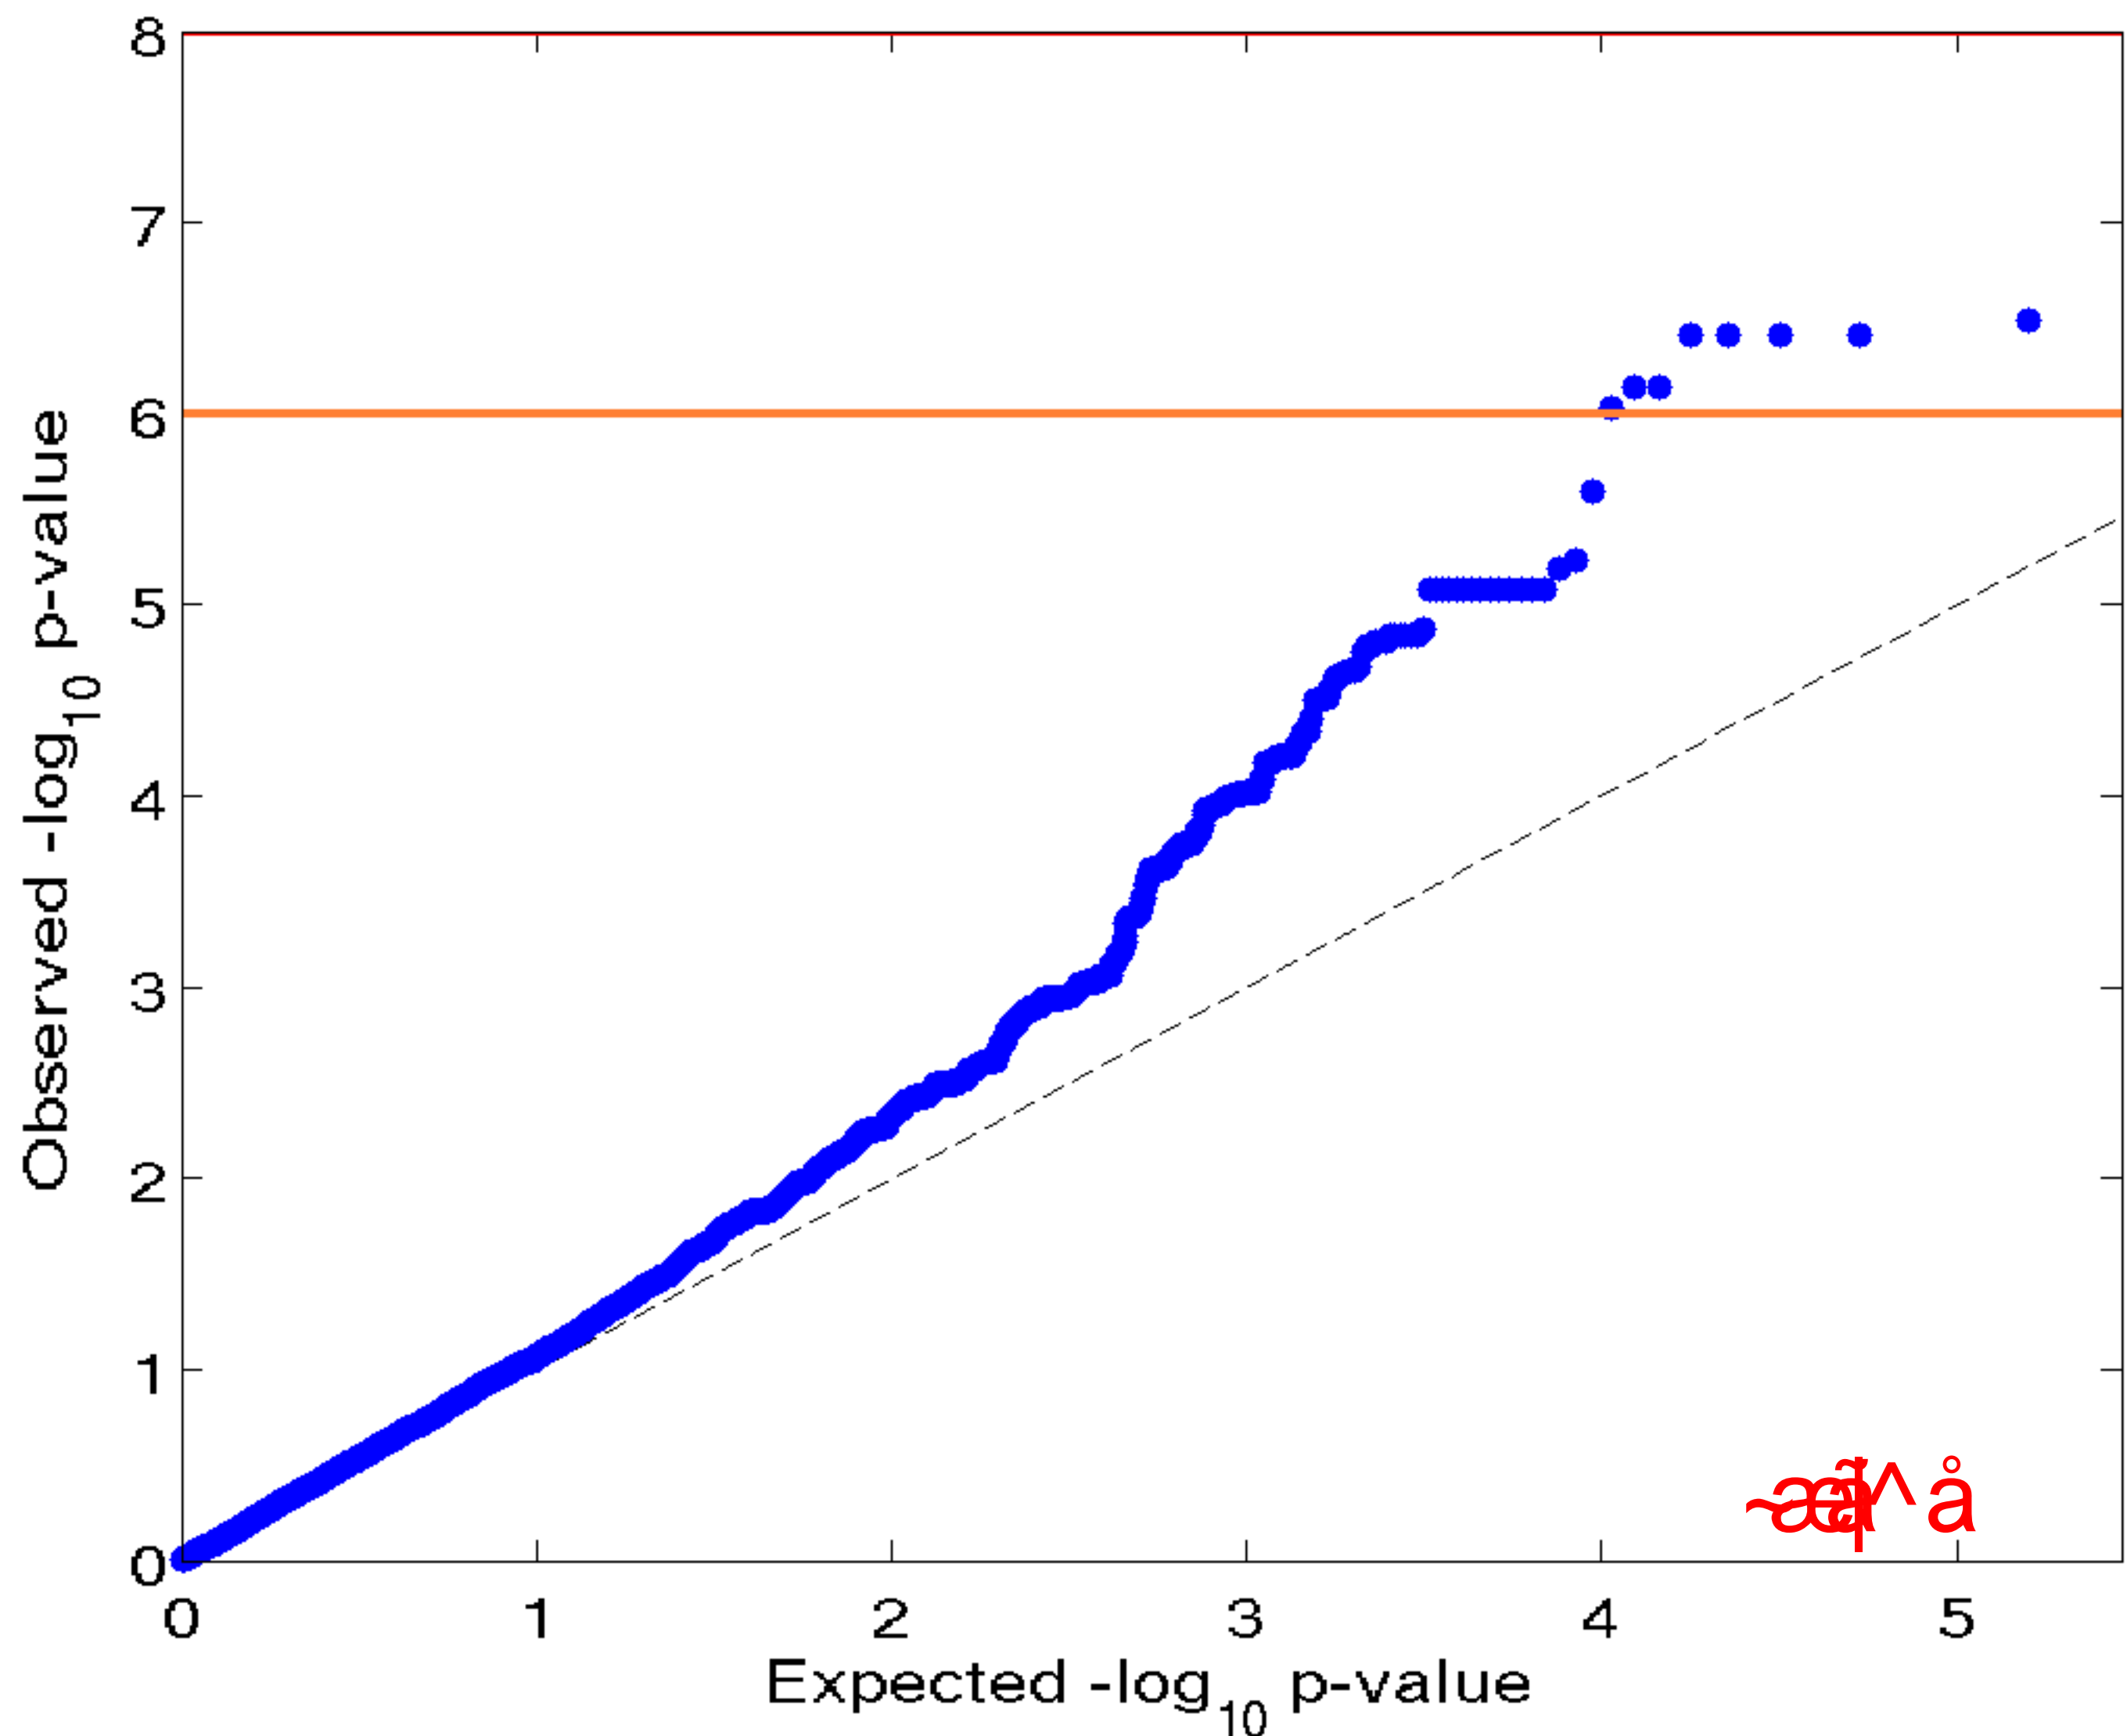



PR - ctr

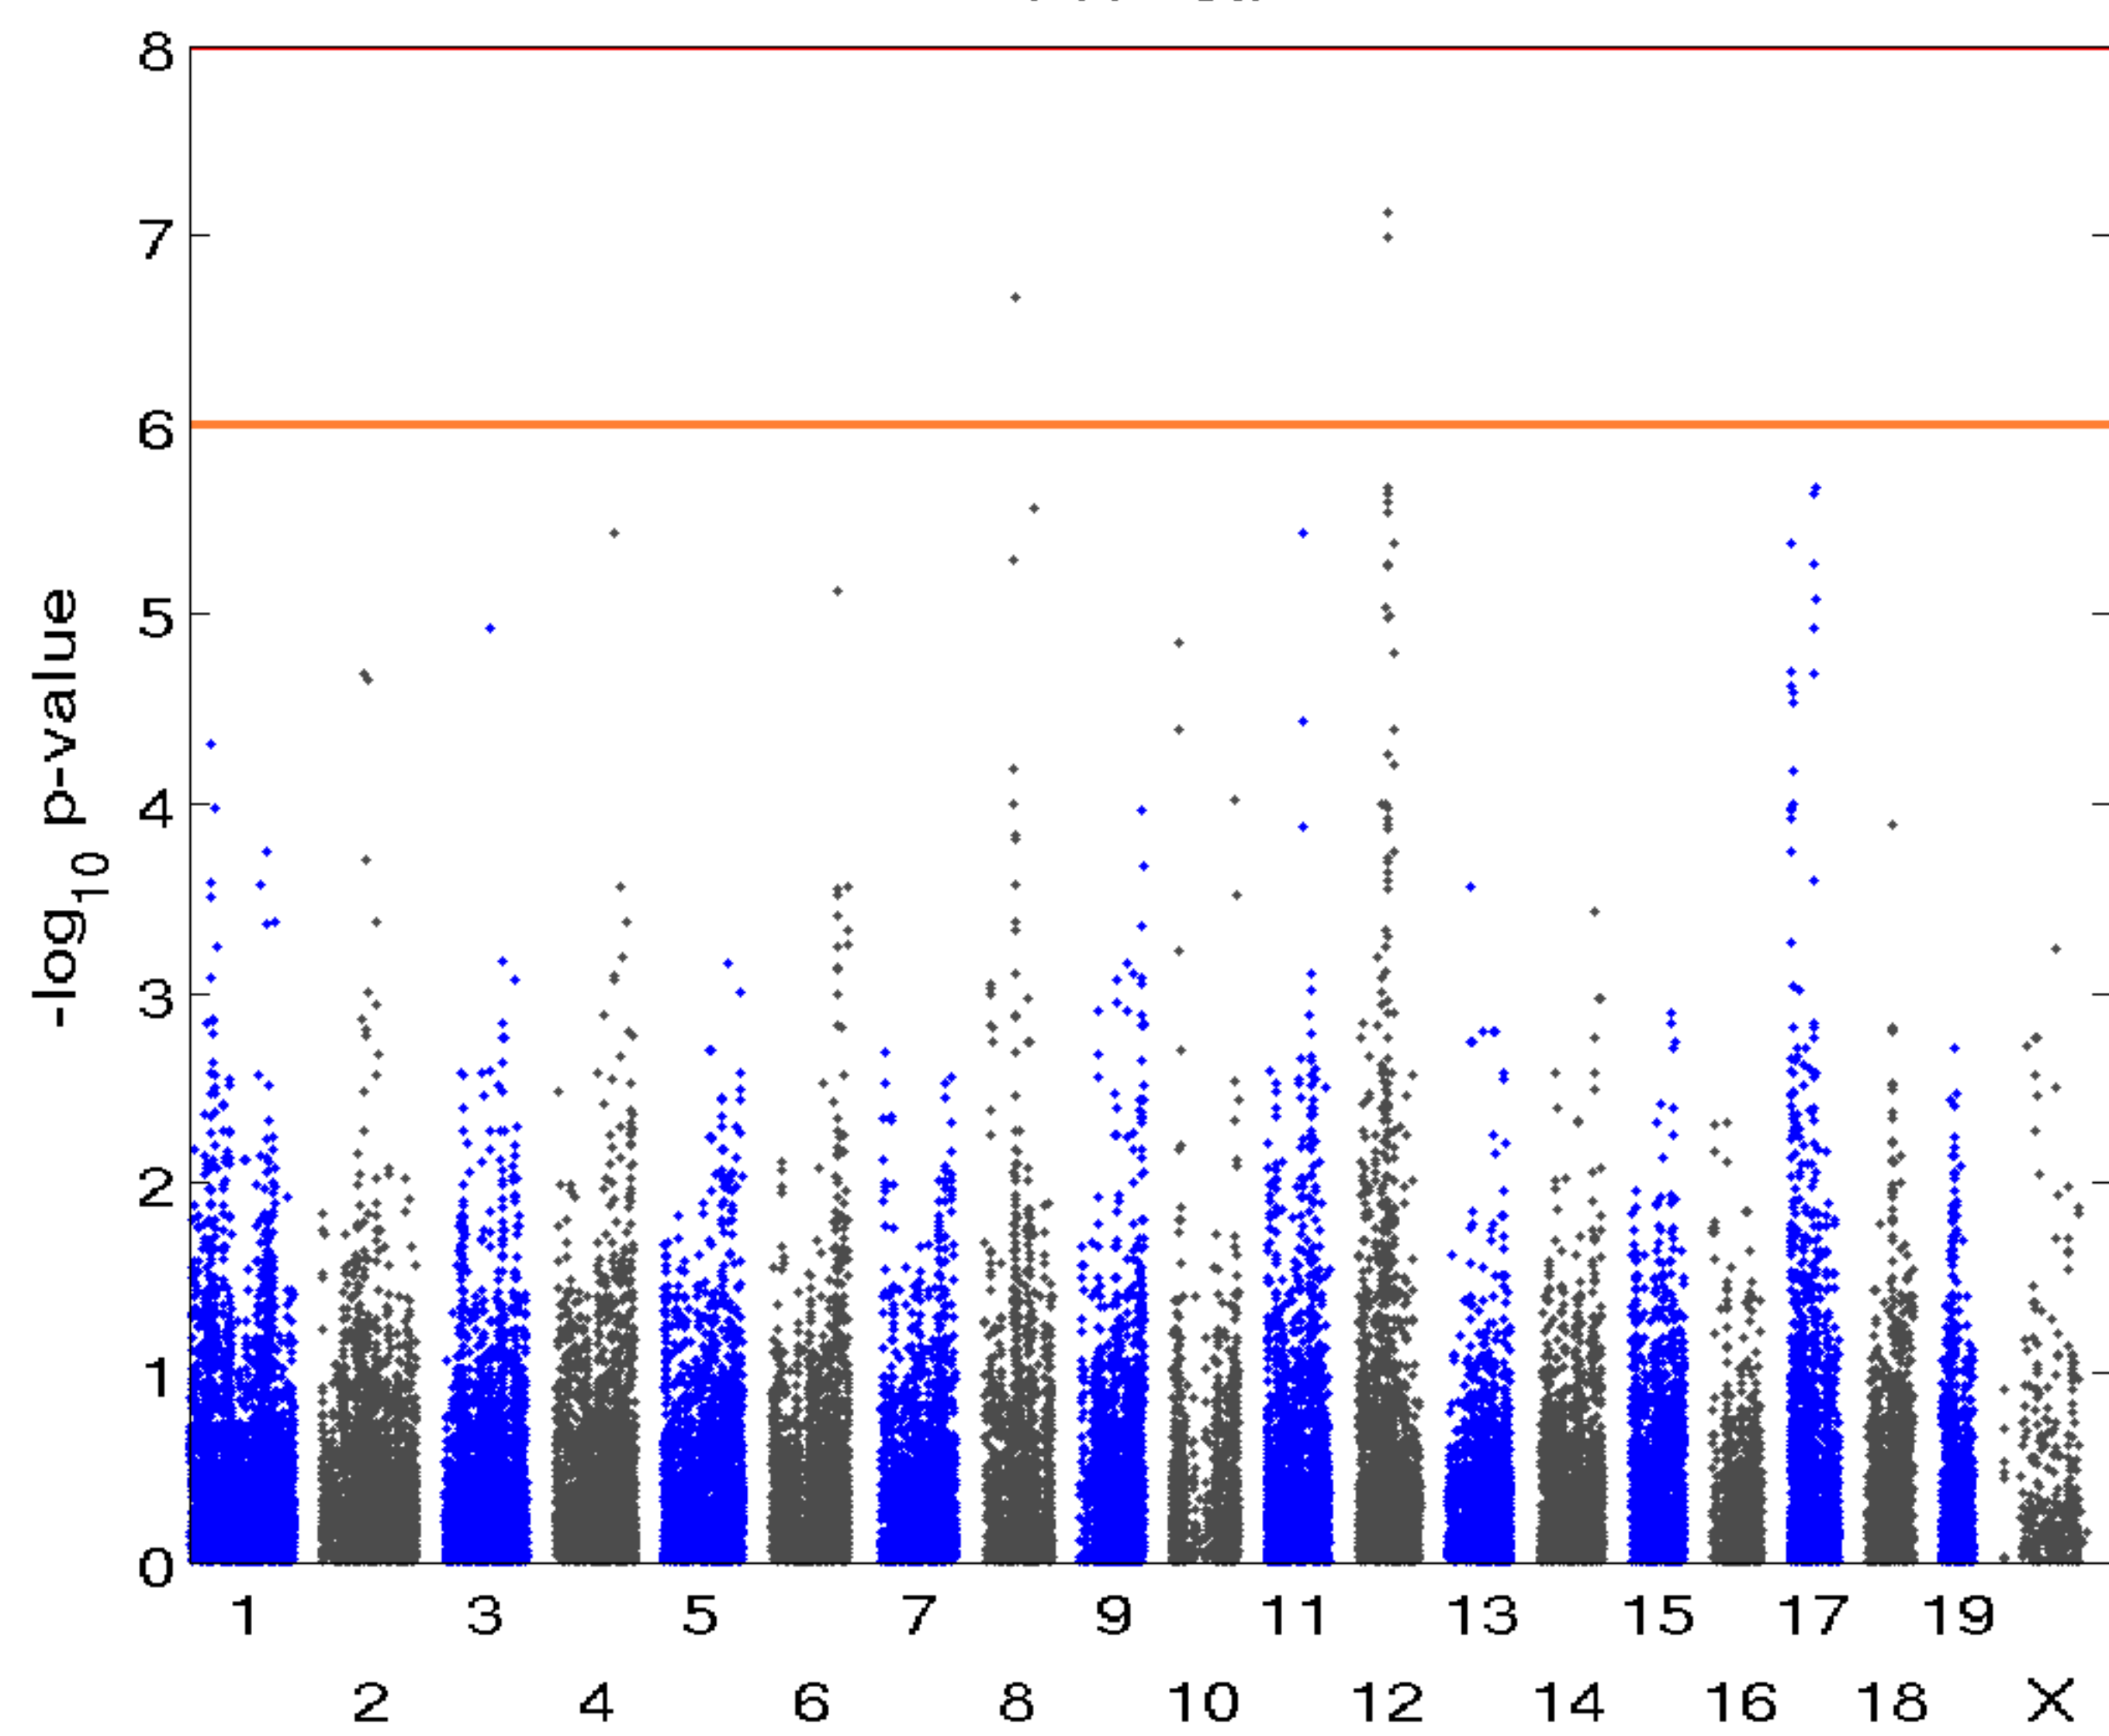

PR - ctr

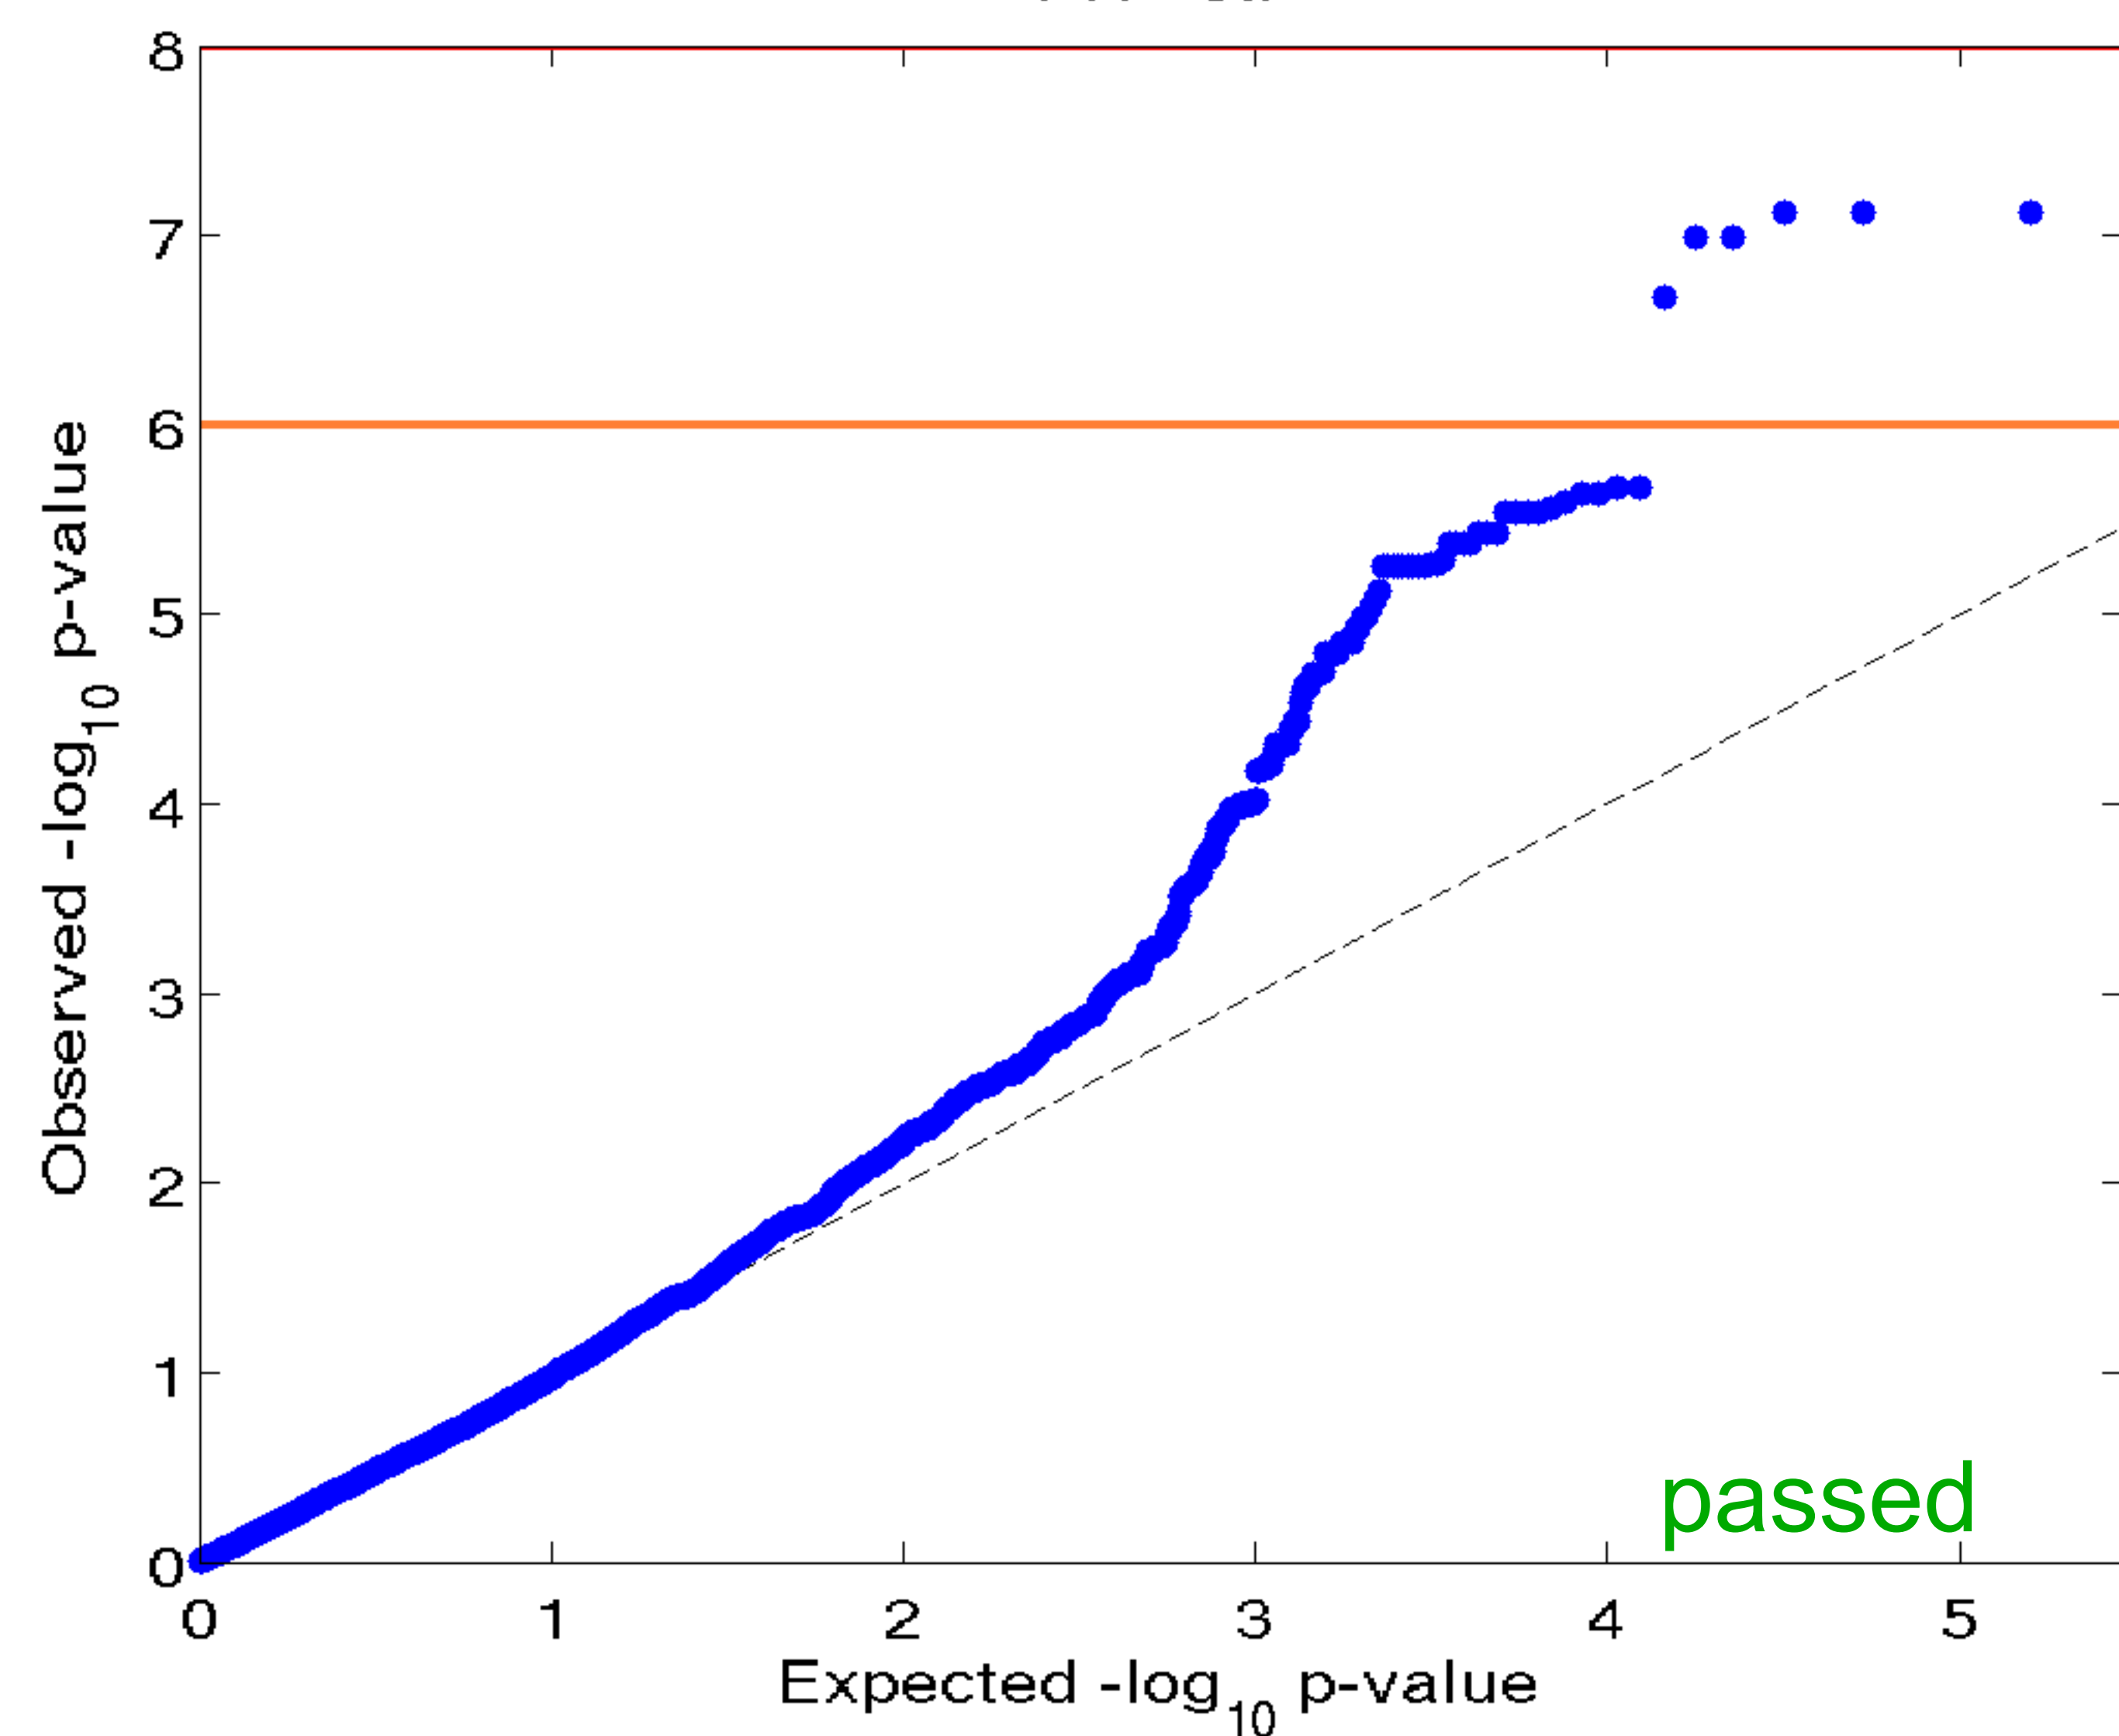

Qamp - ctr

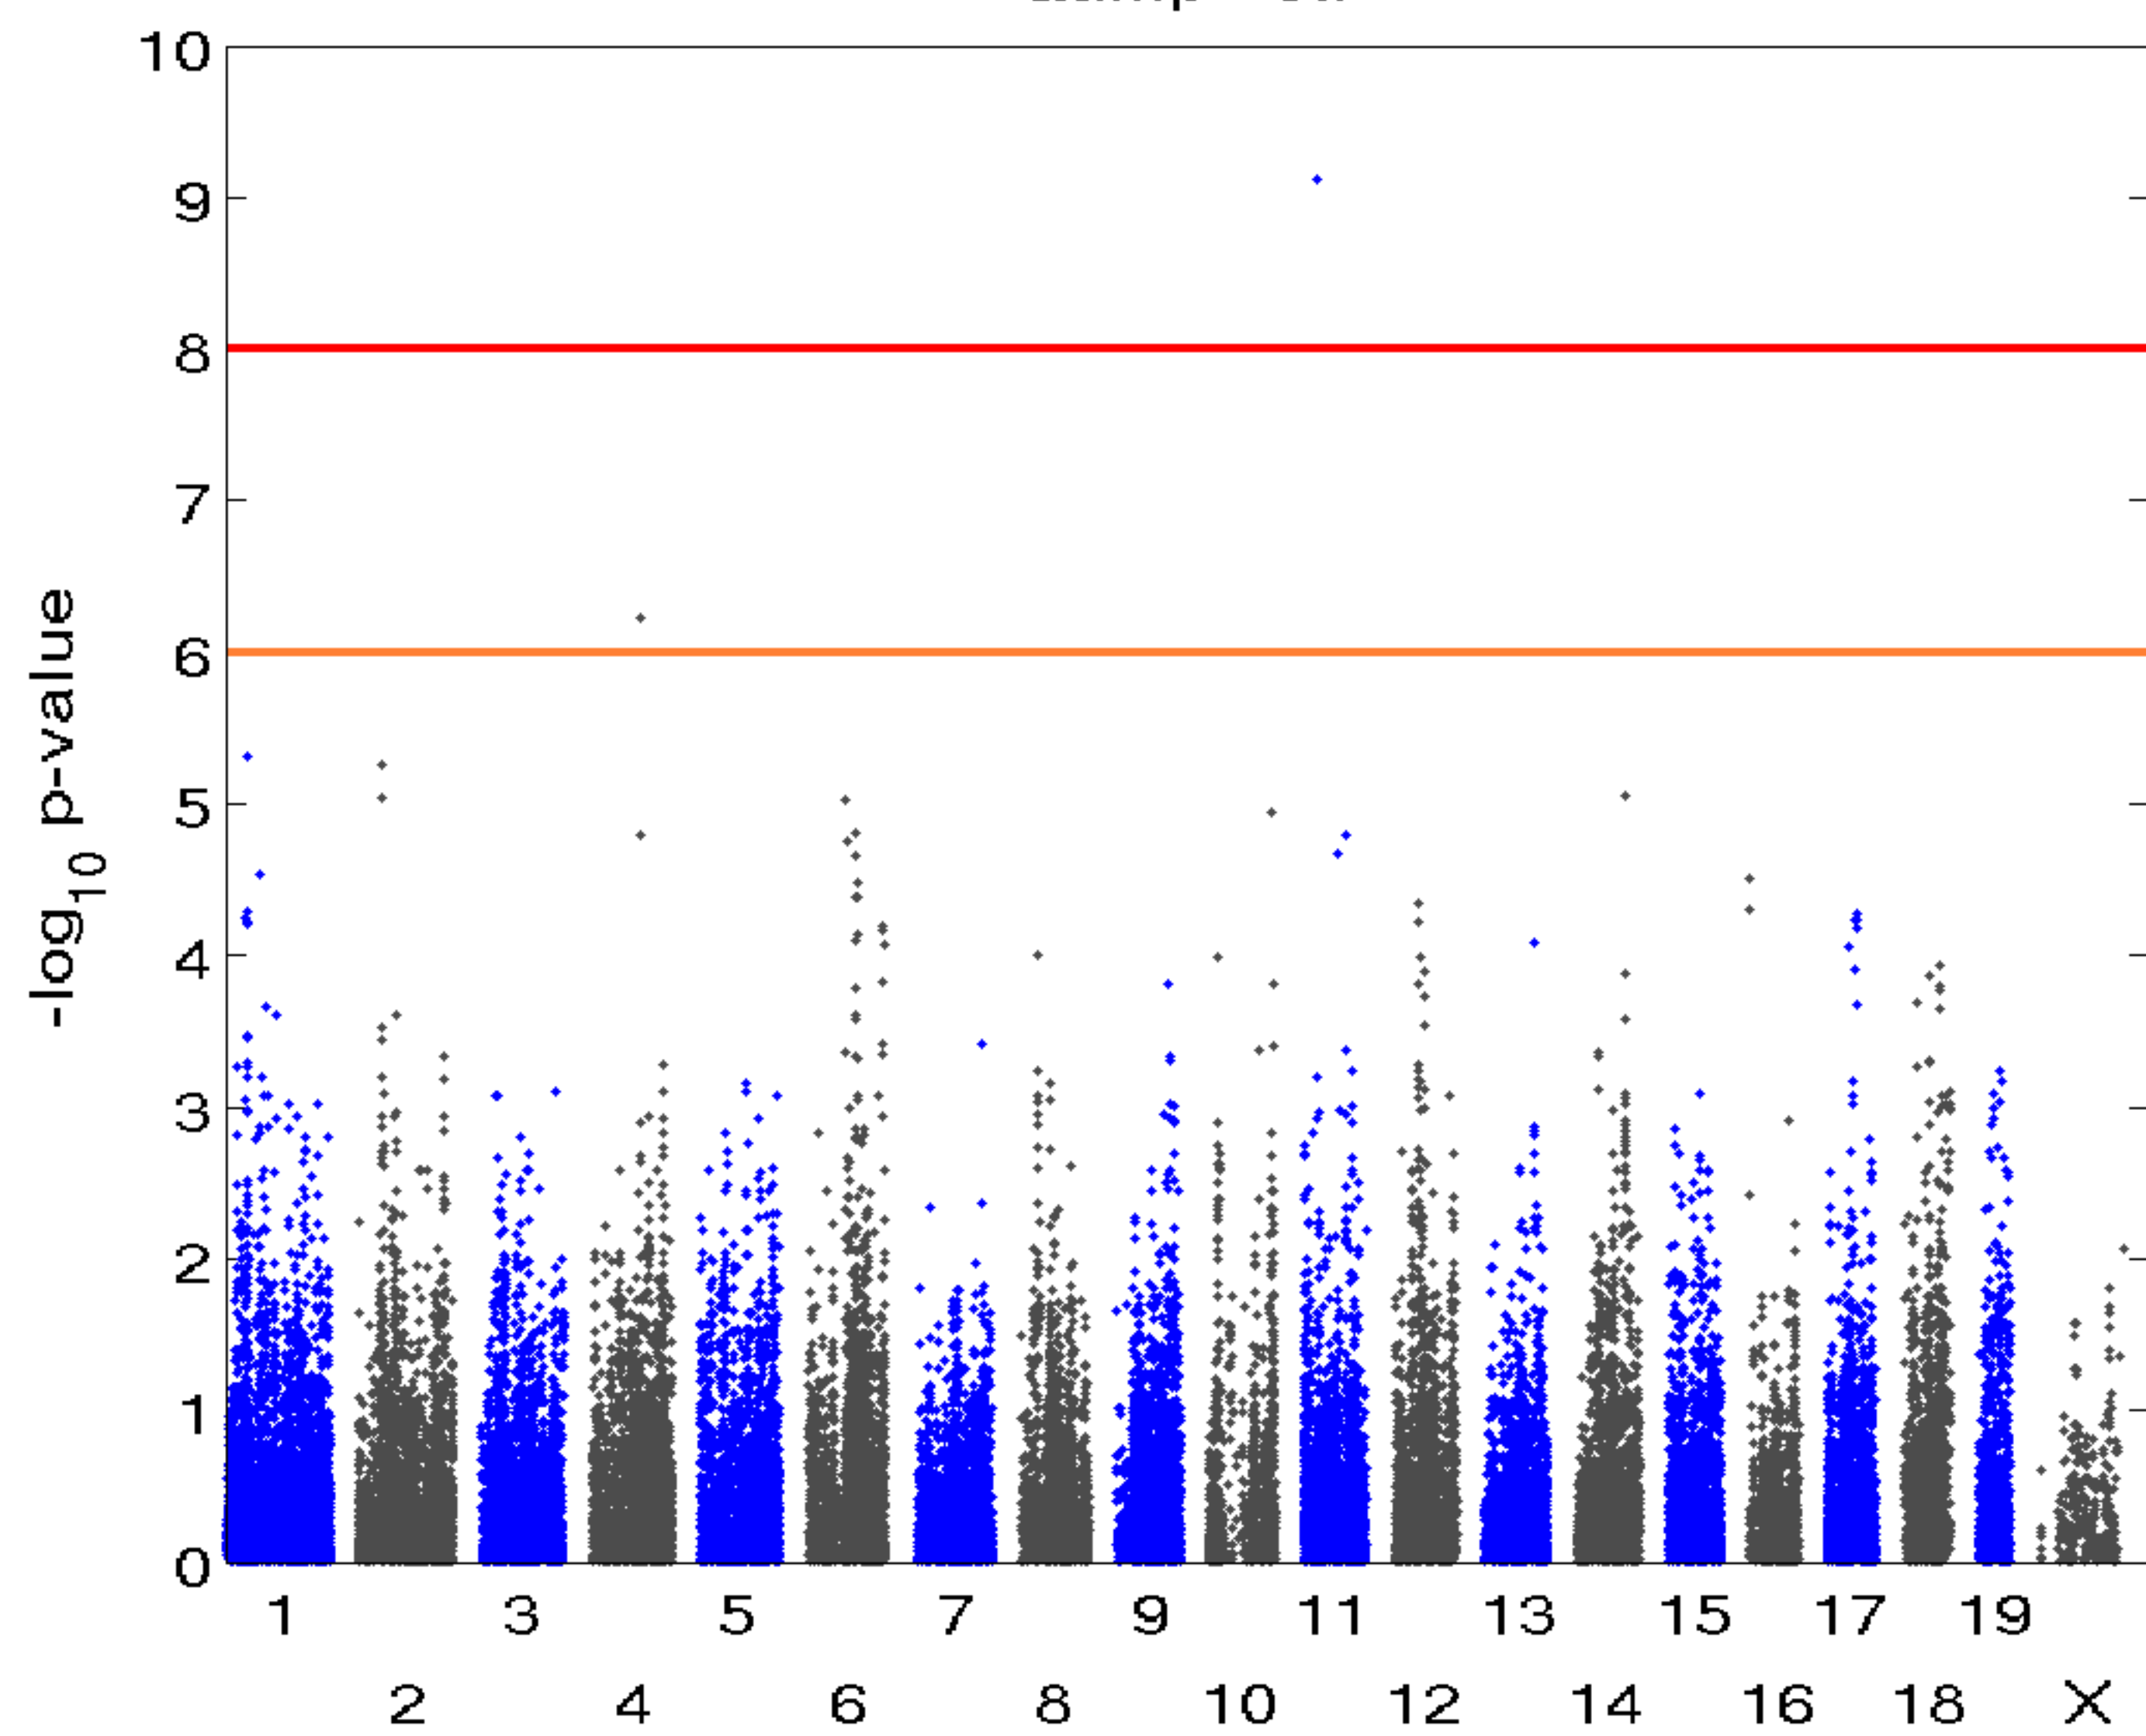

Qamp - ctr

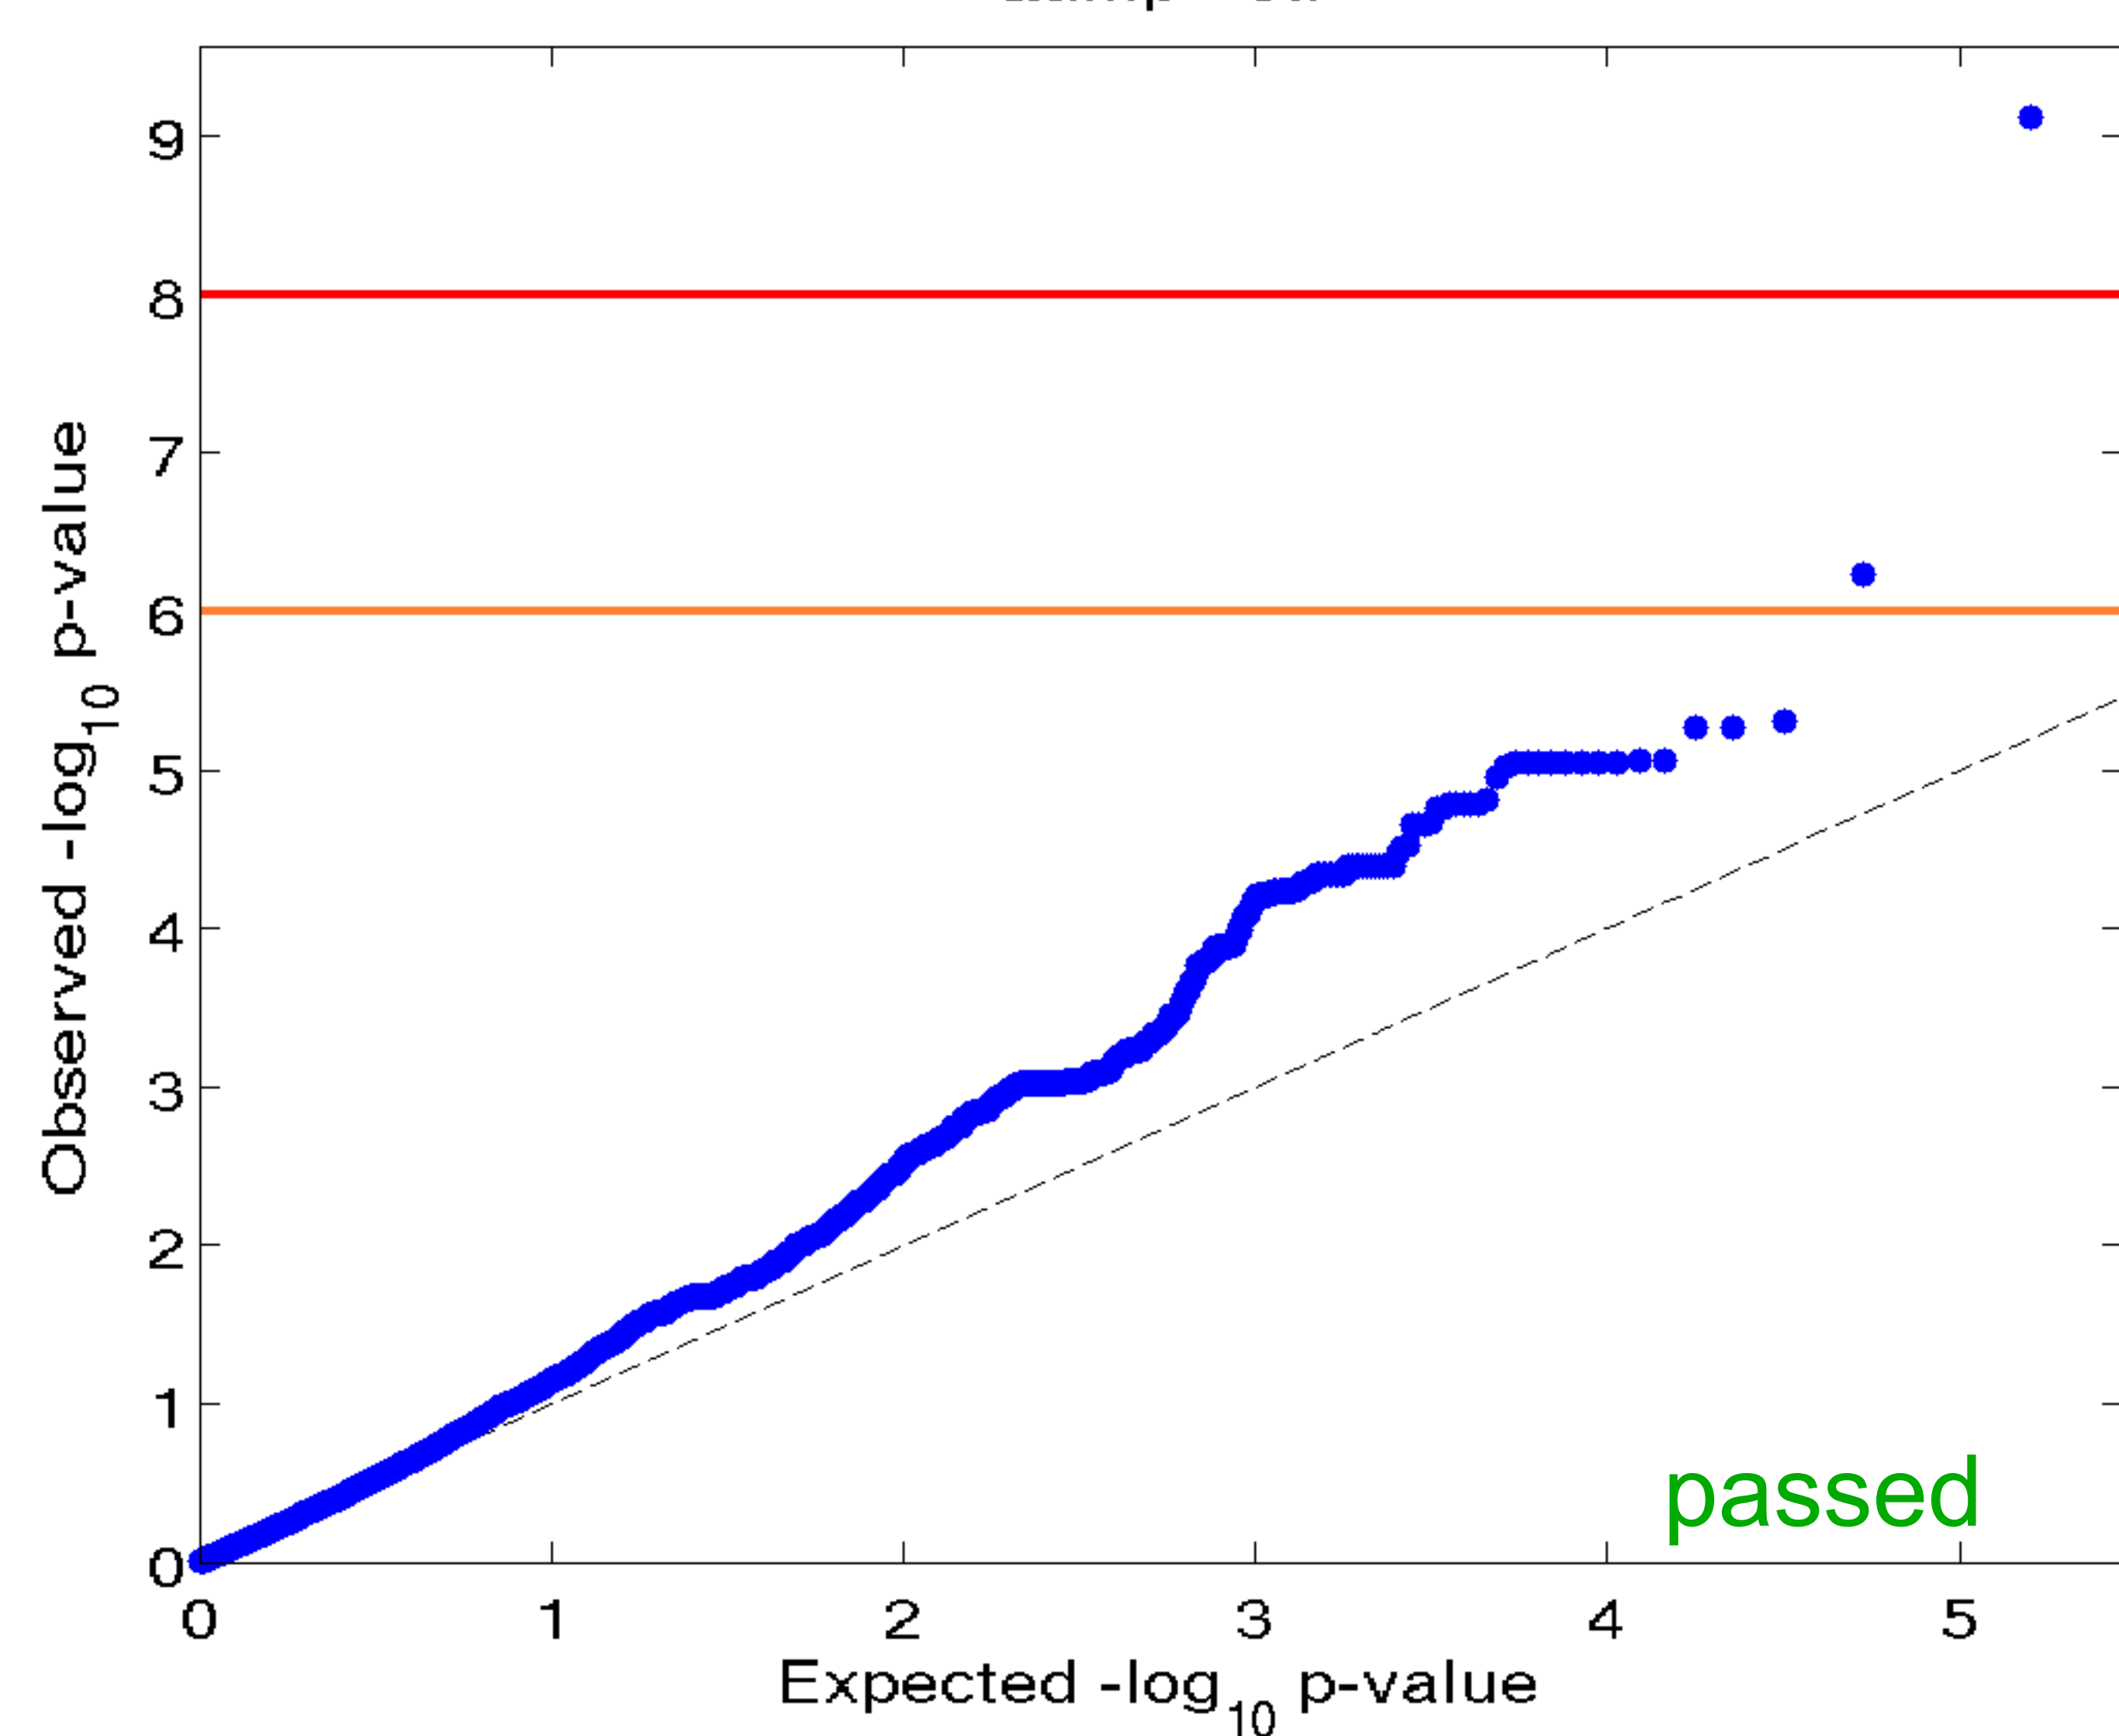

QRSarea - ctr

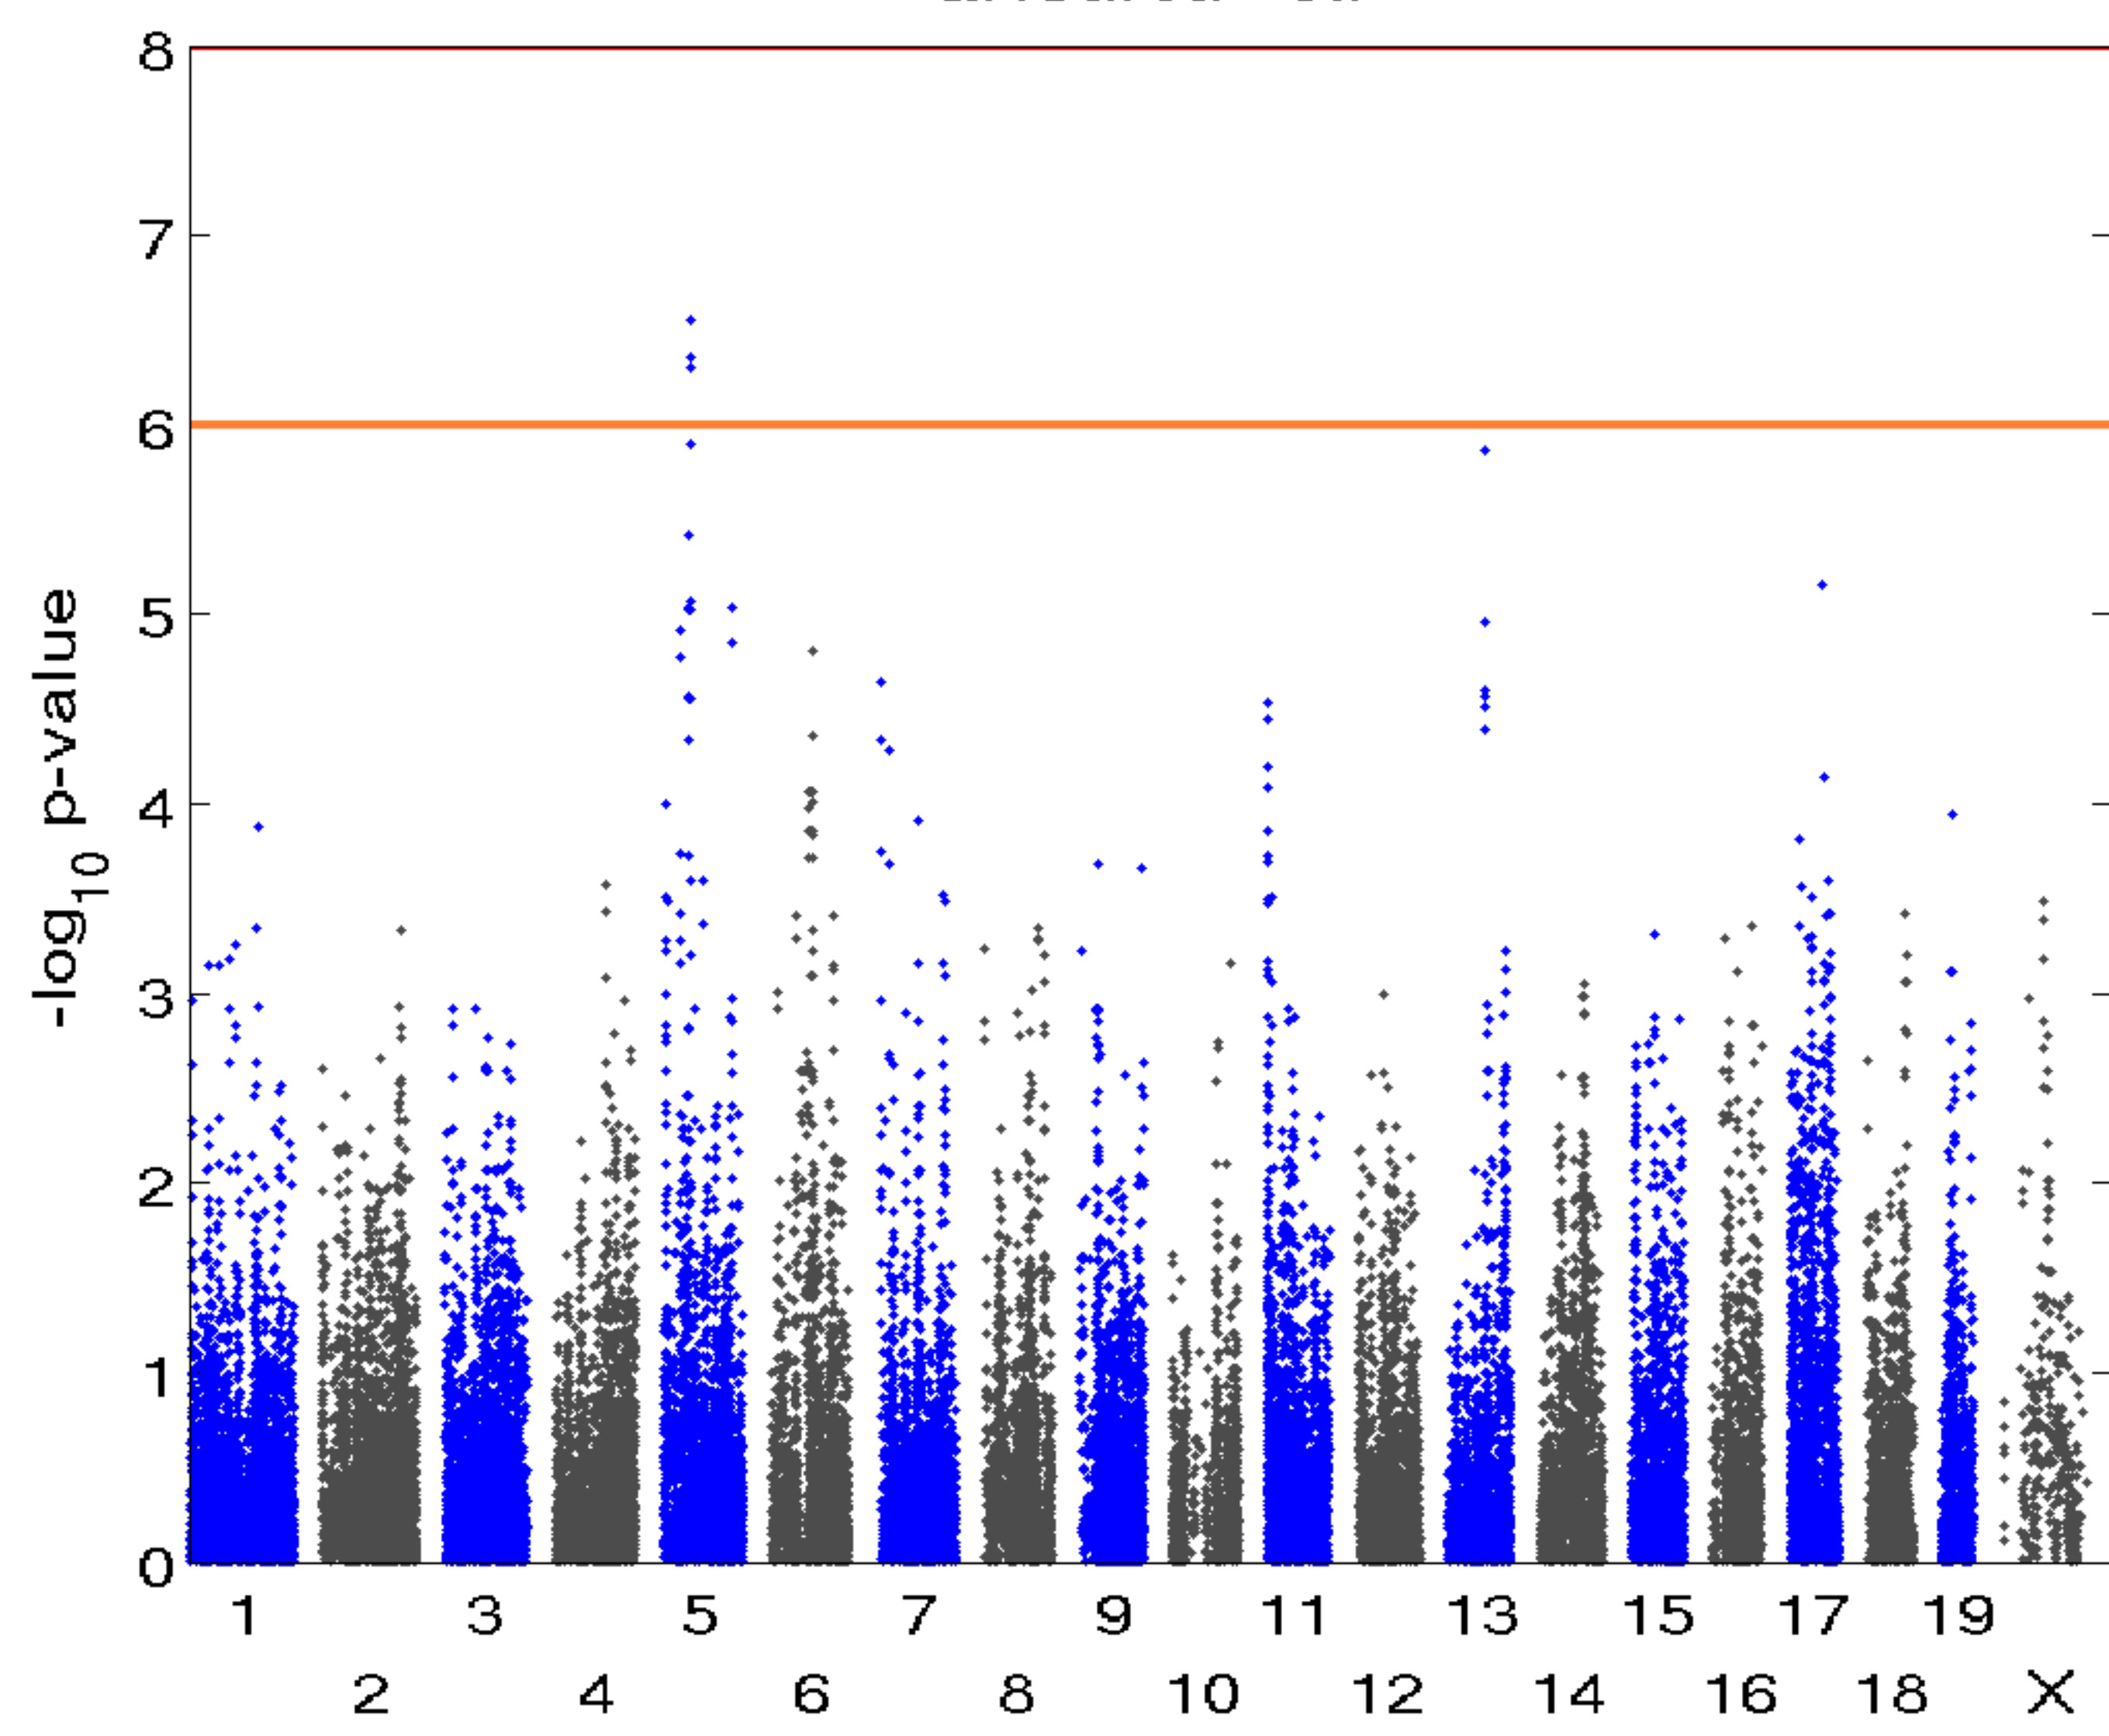

QRSarea - ctr

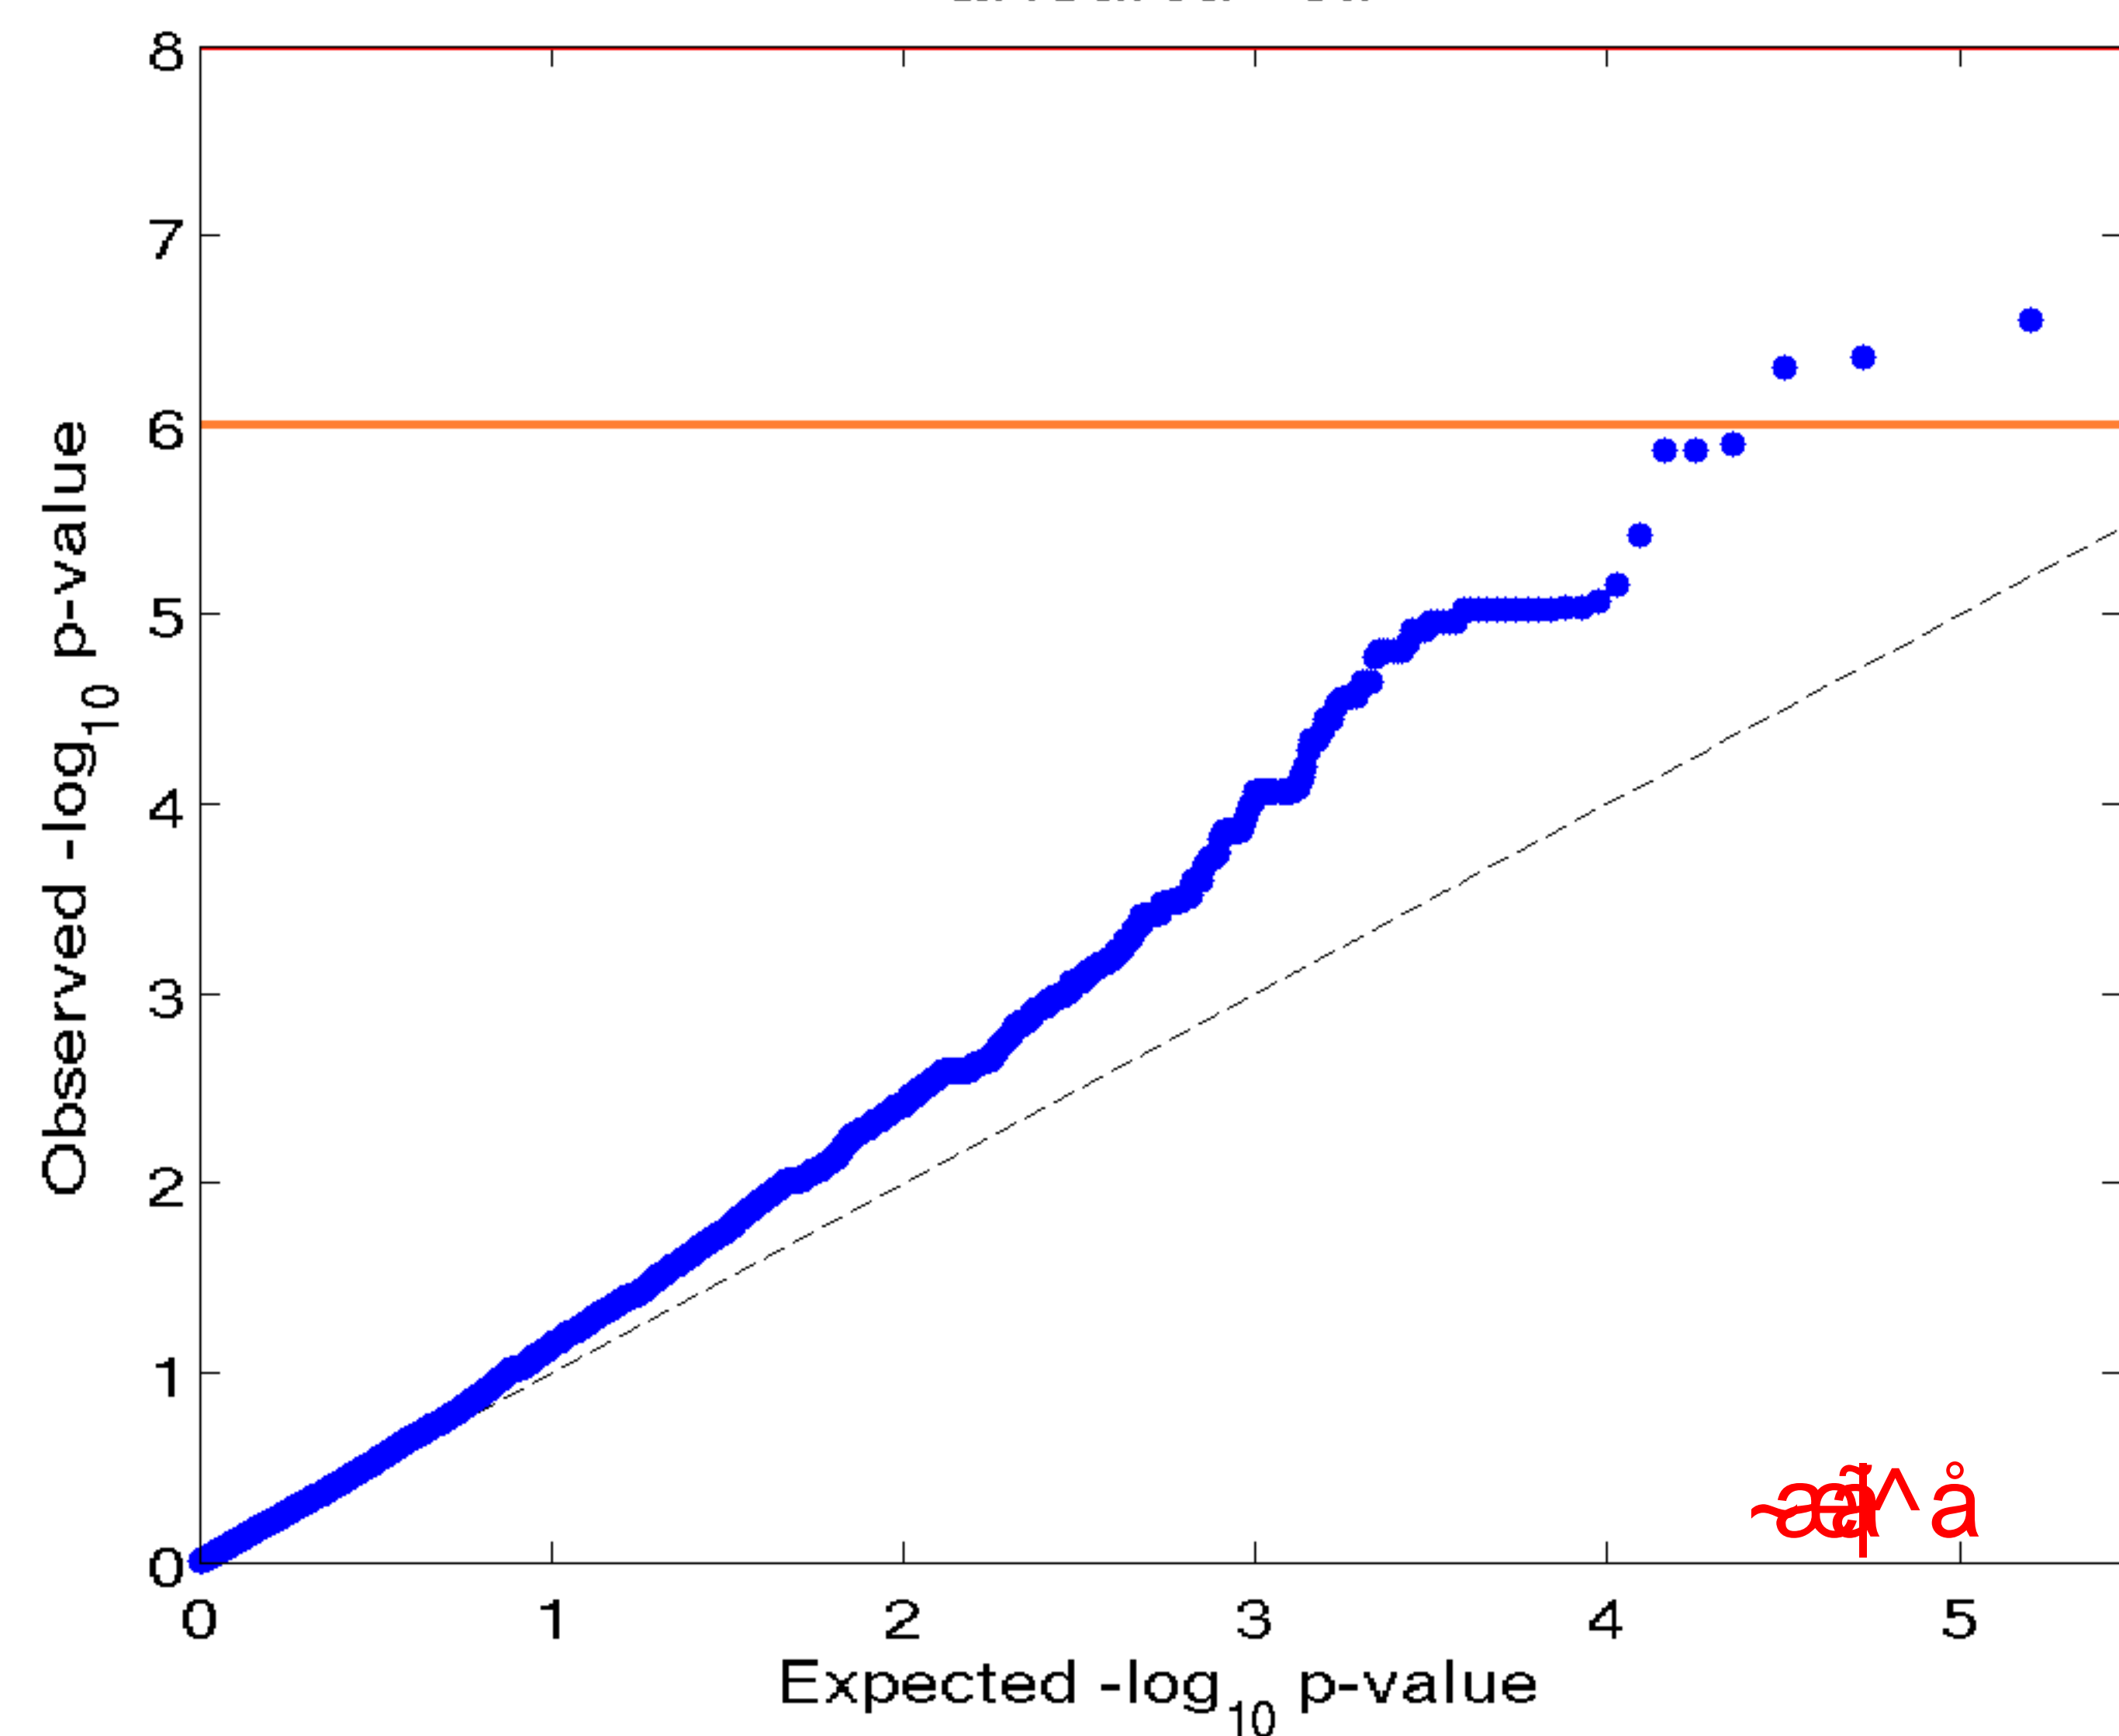

QRS - ctr

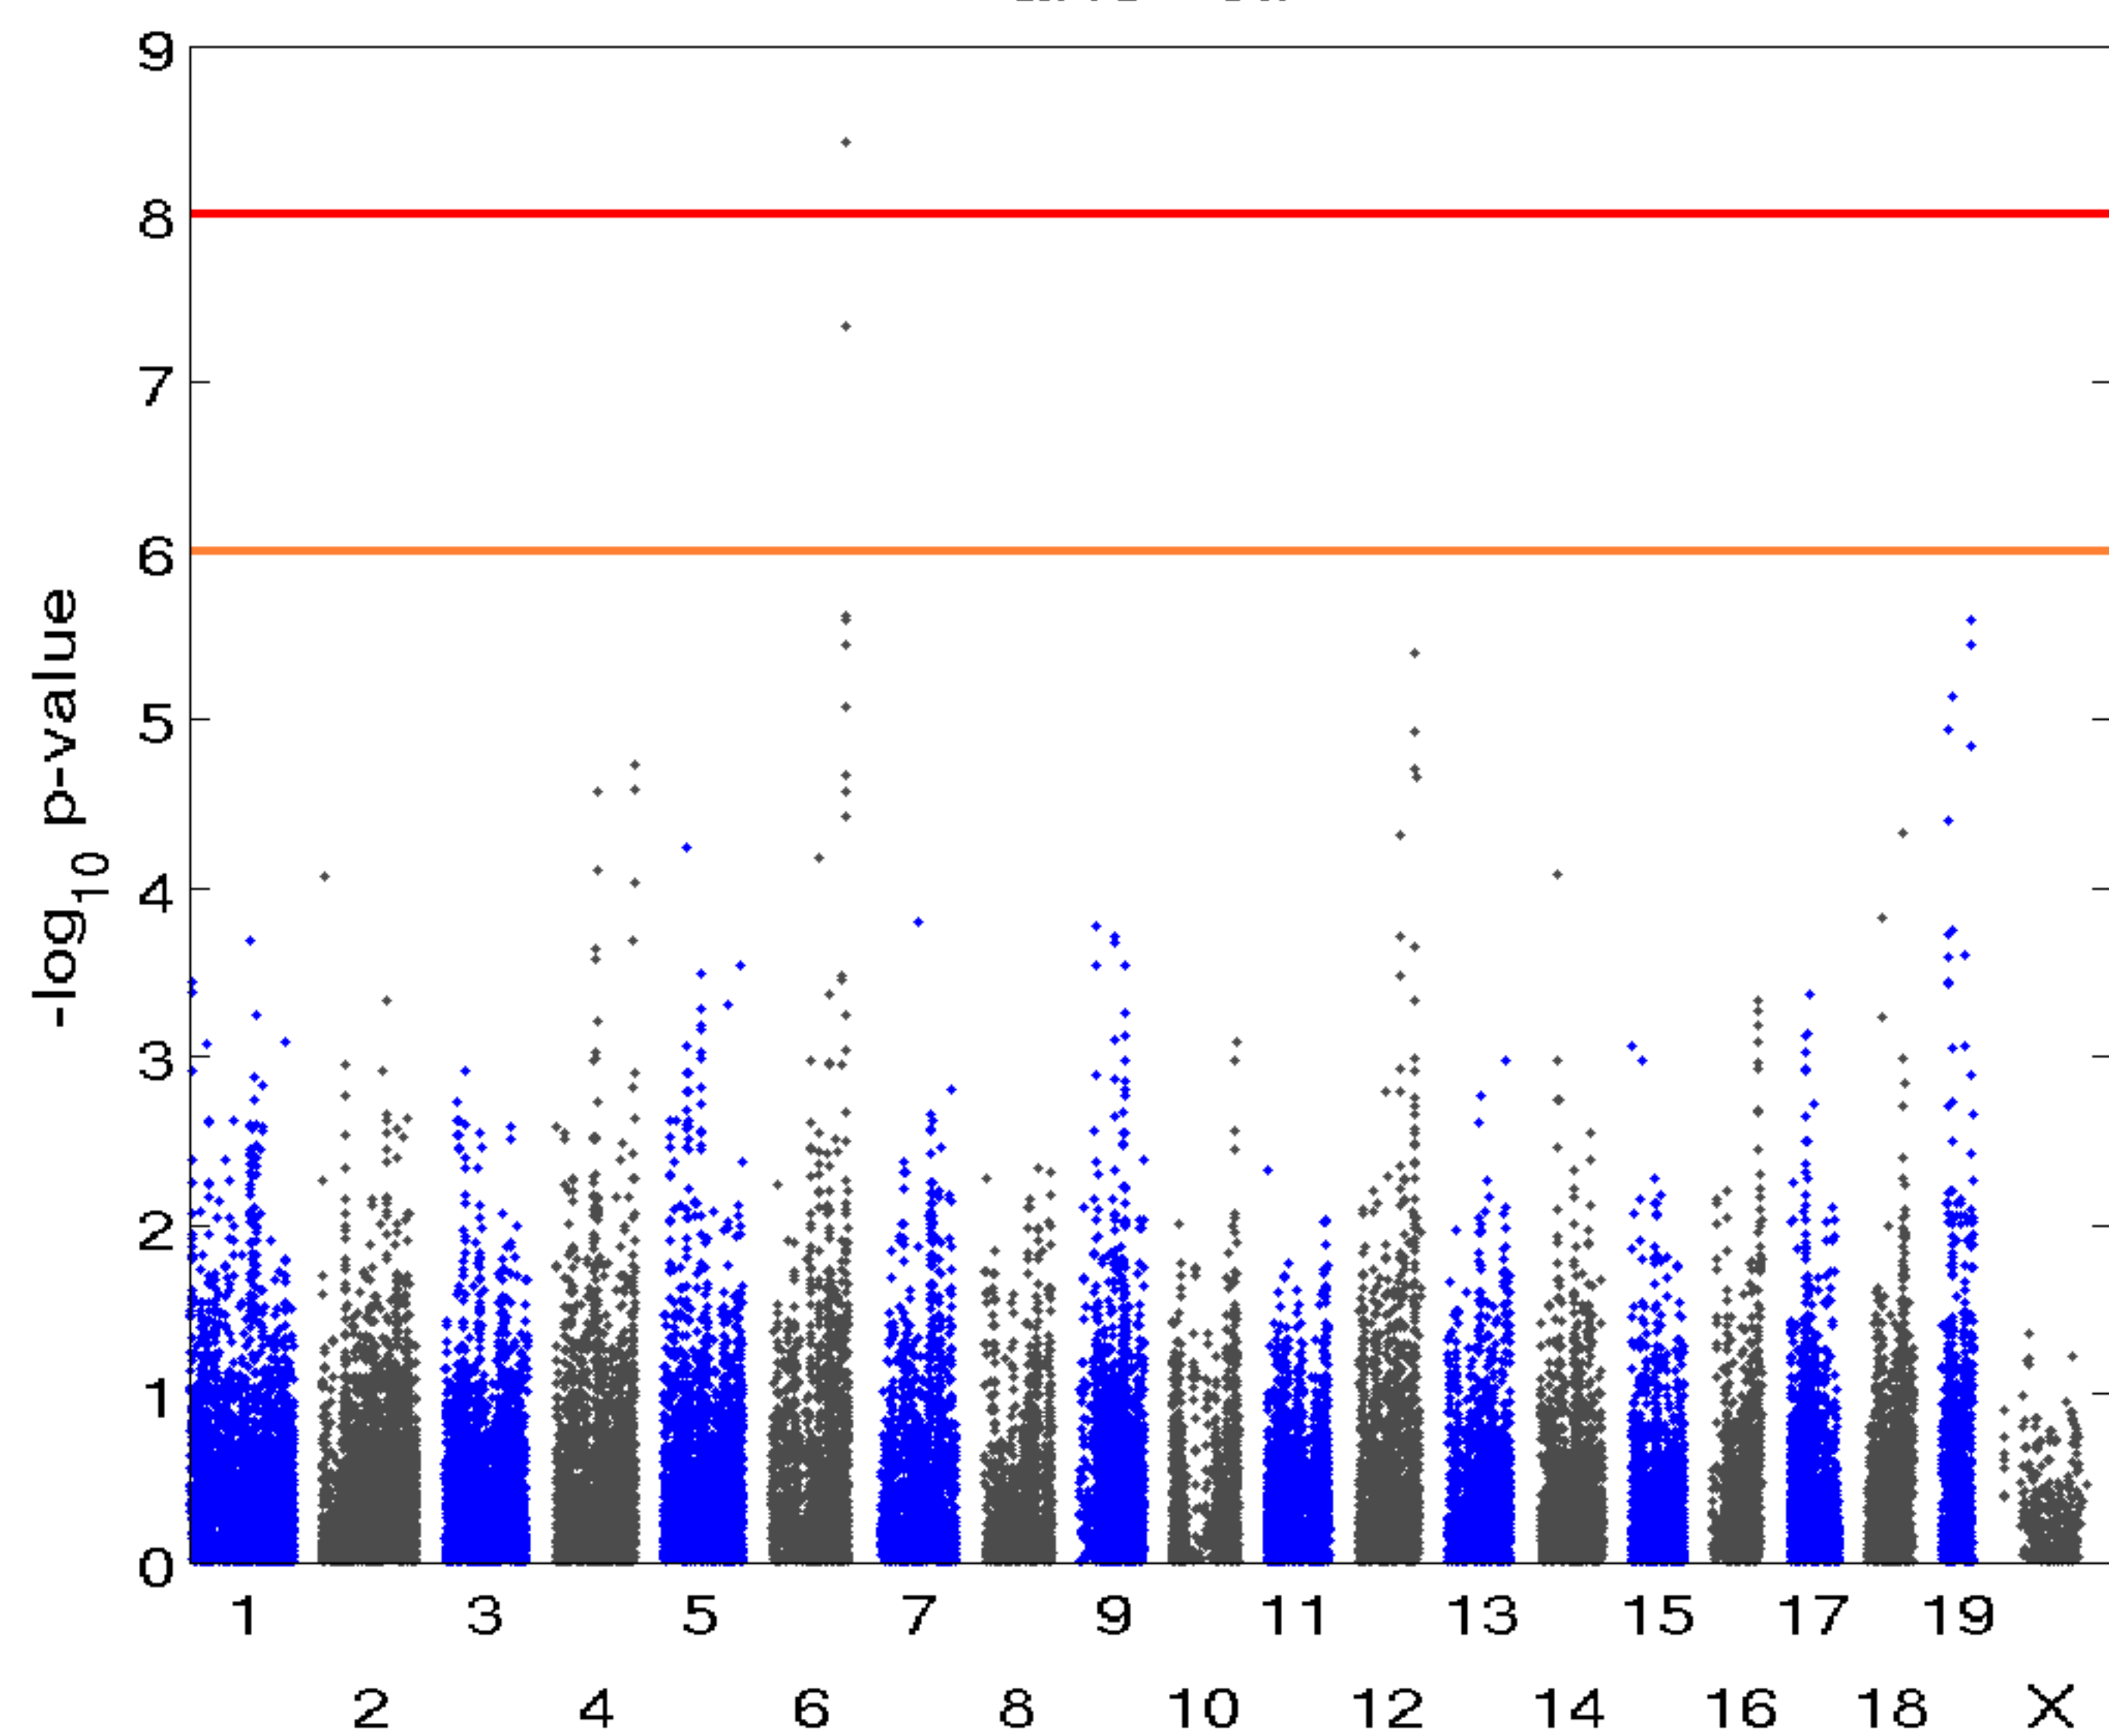

QRS - ctr

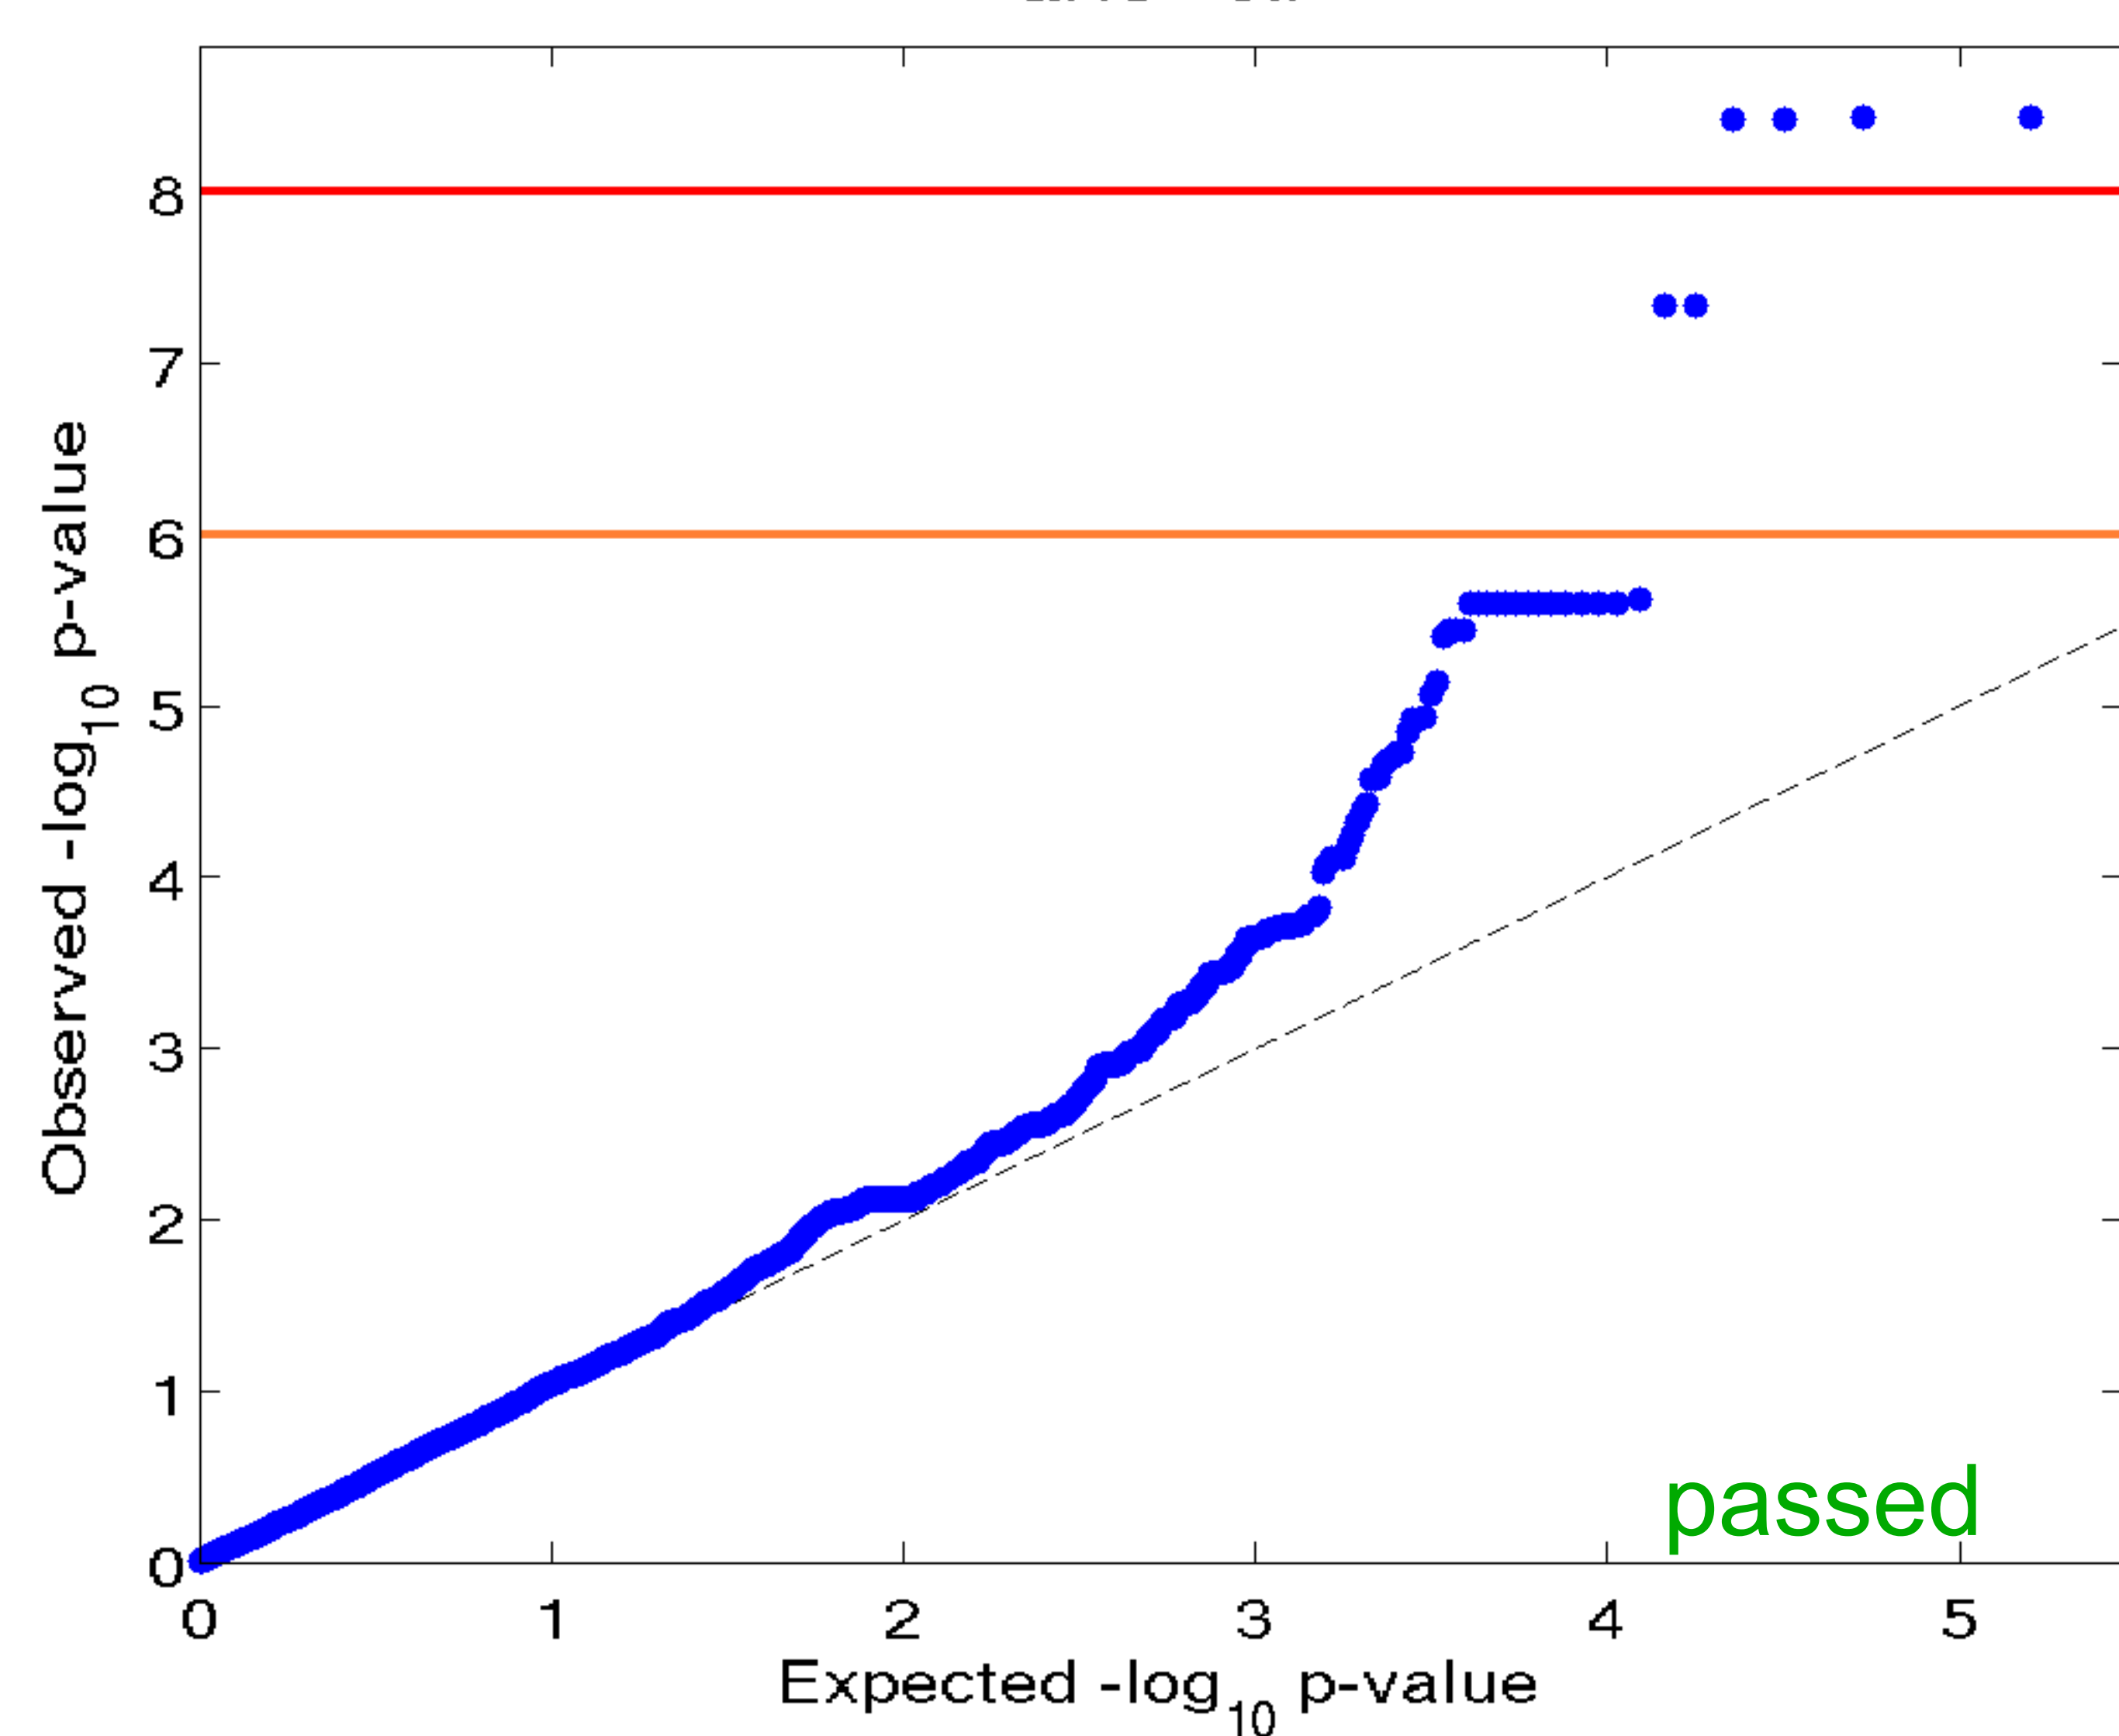



QTc - ctr

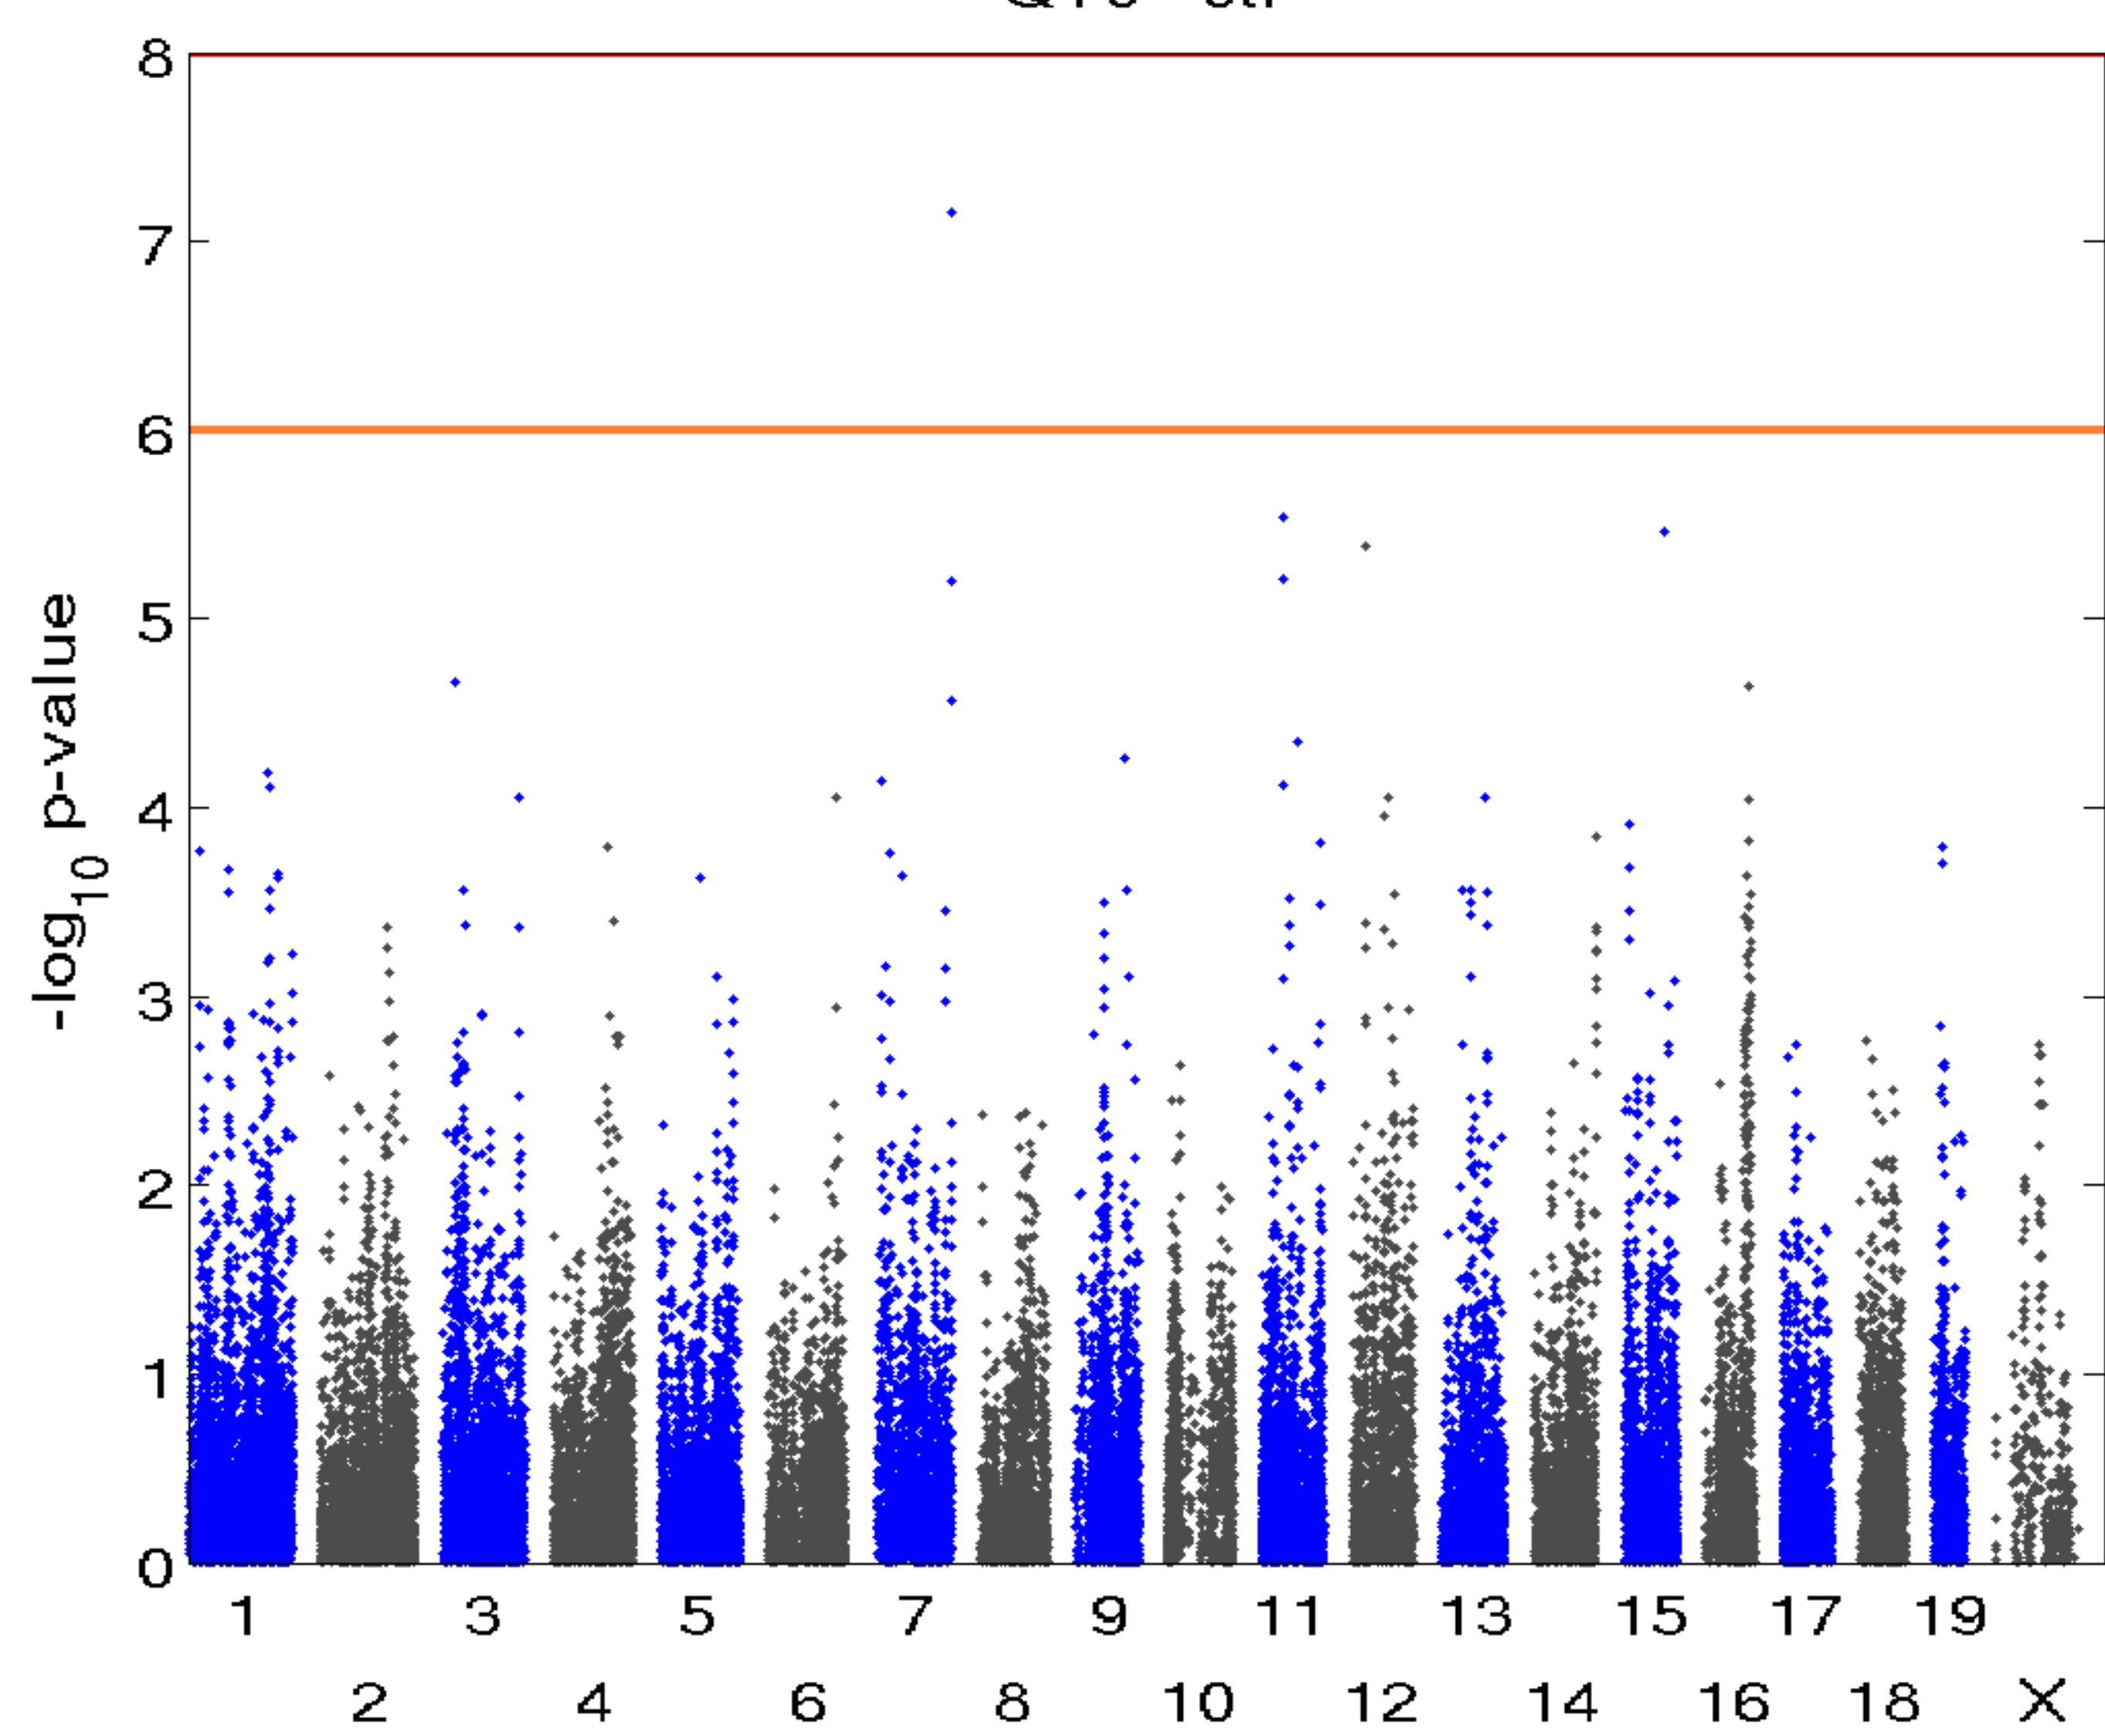

QTc - ctr

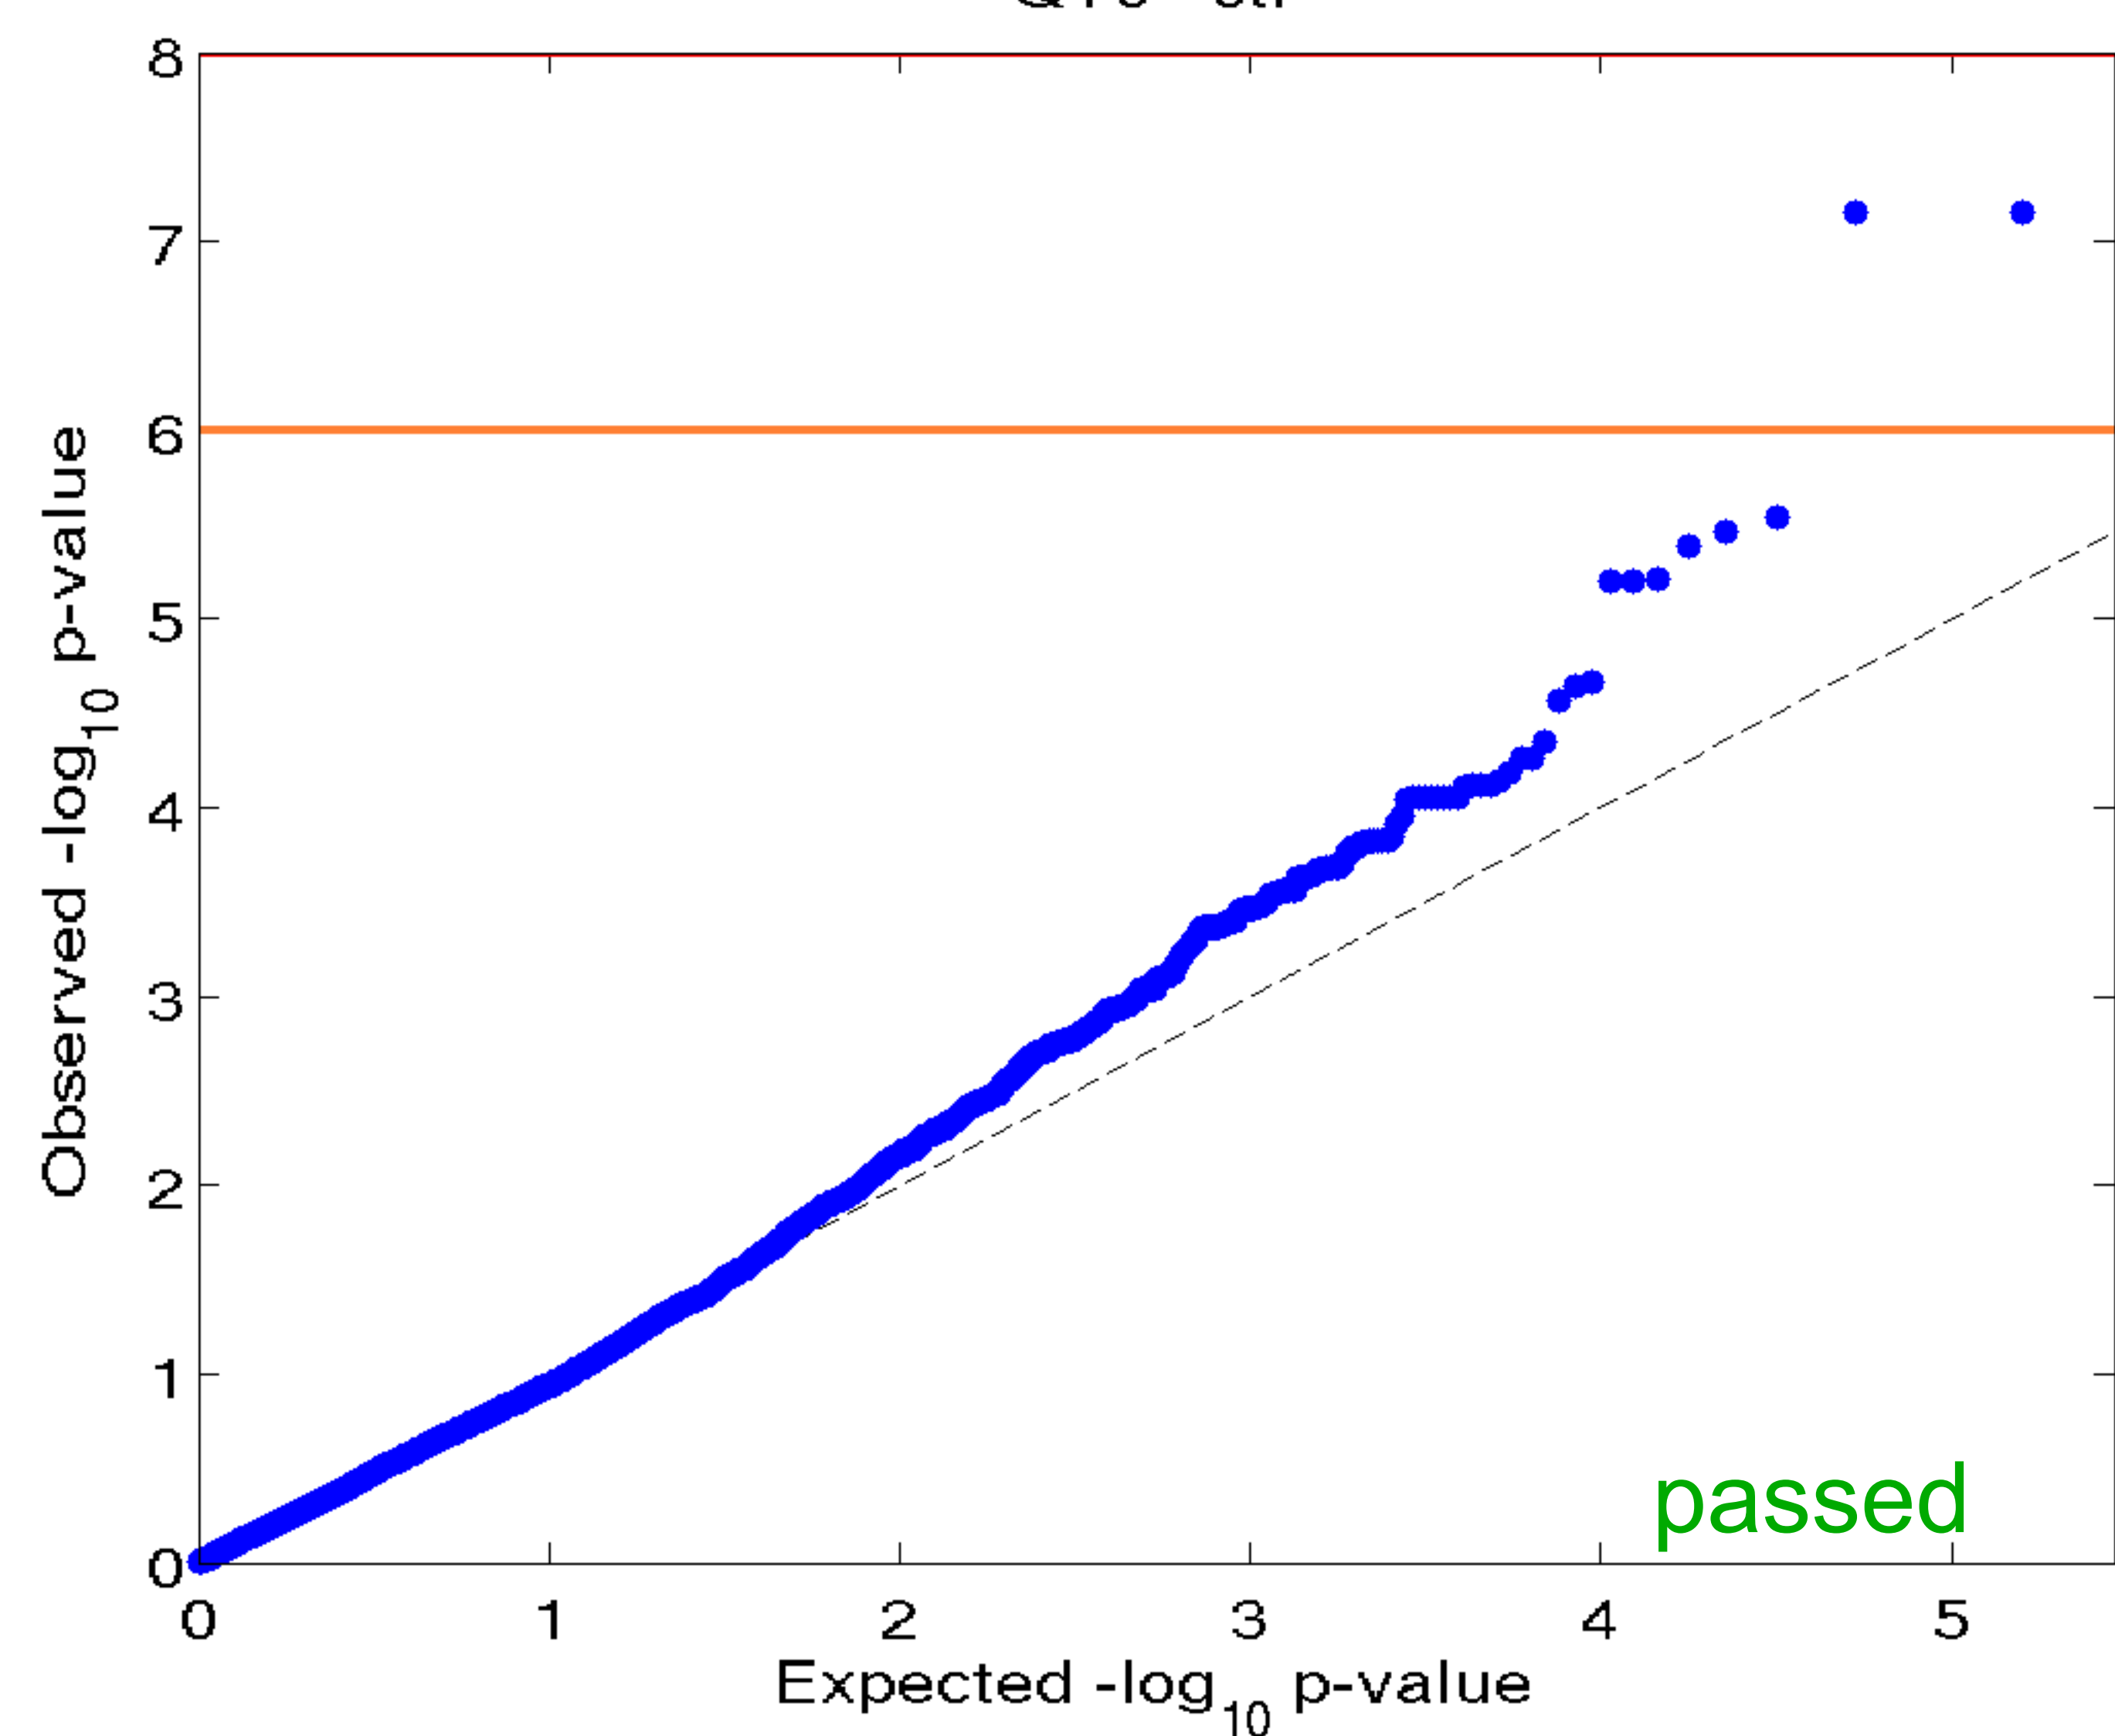

QT - ctr

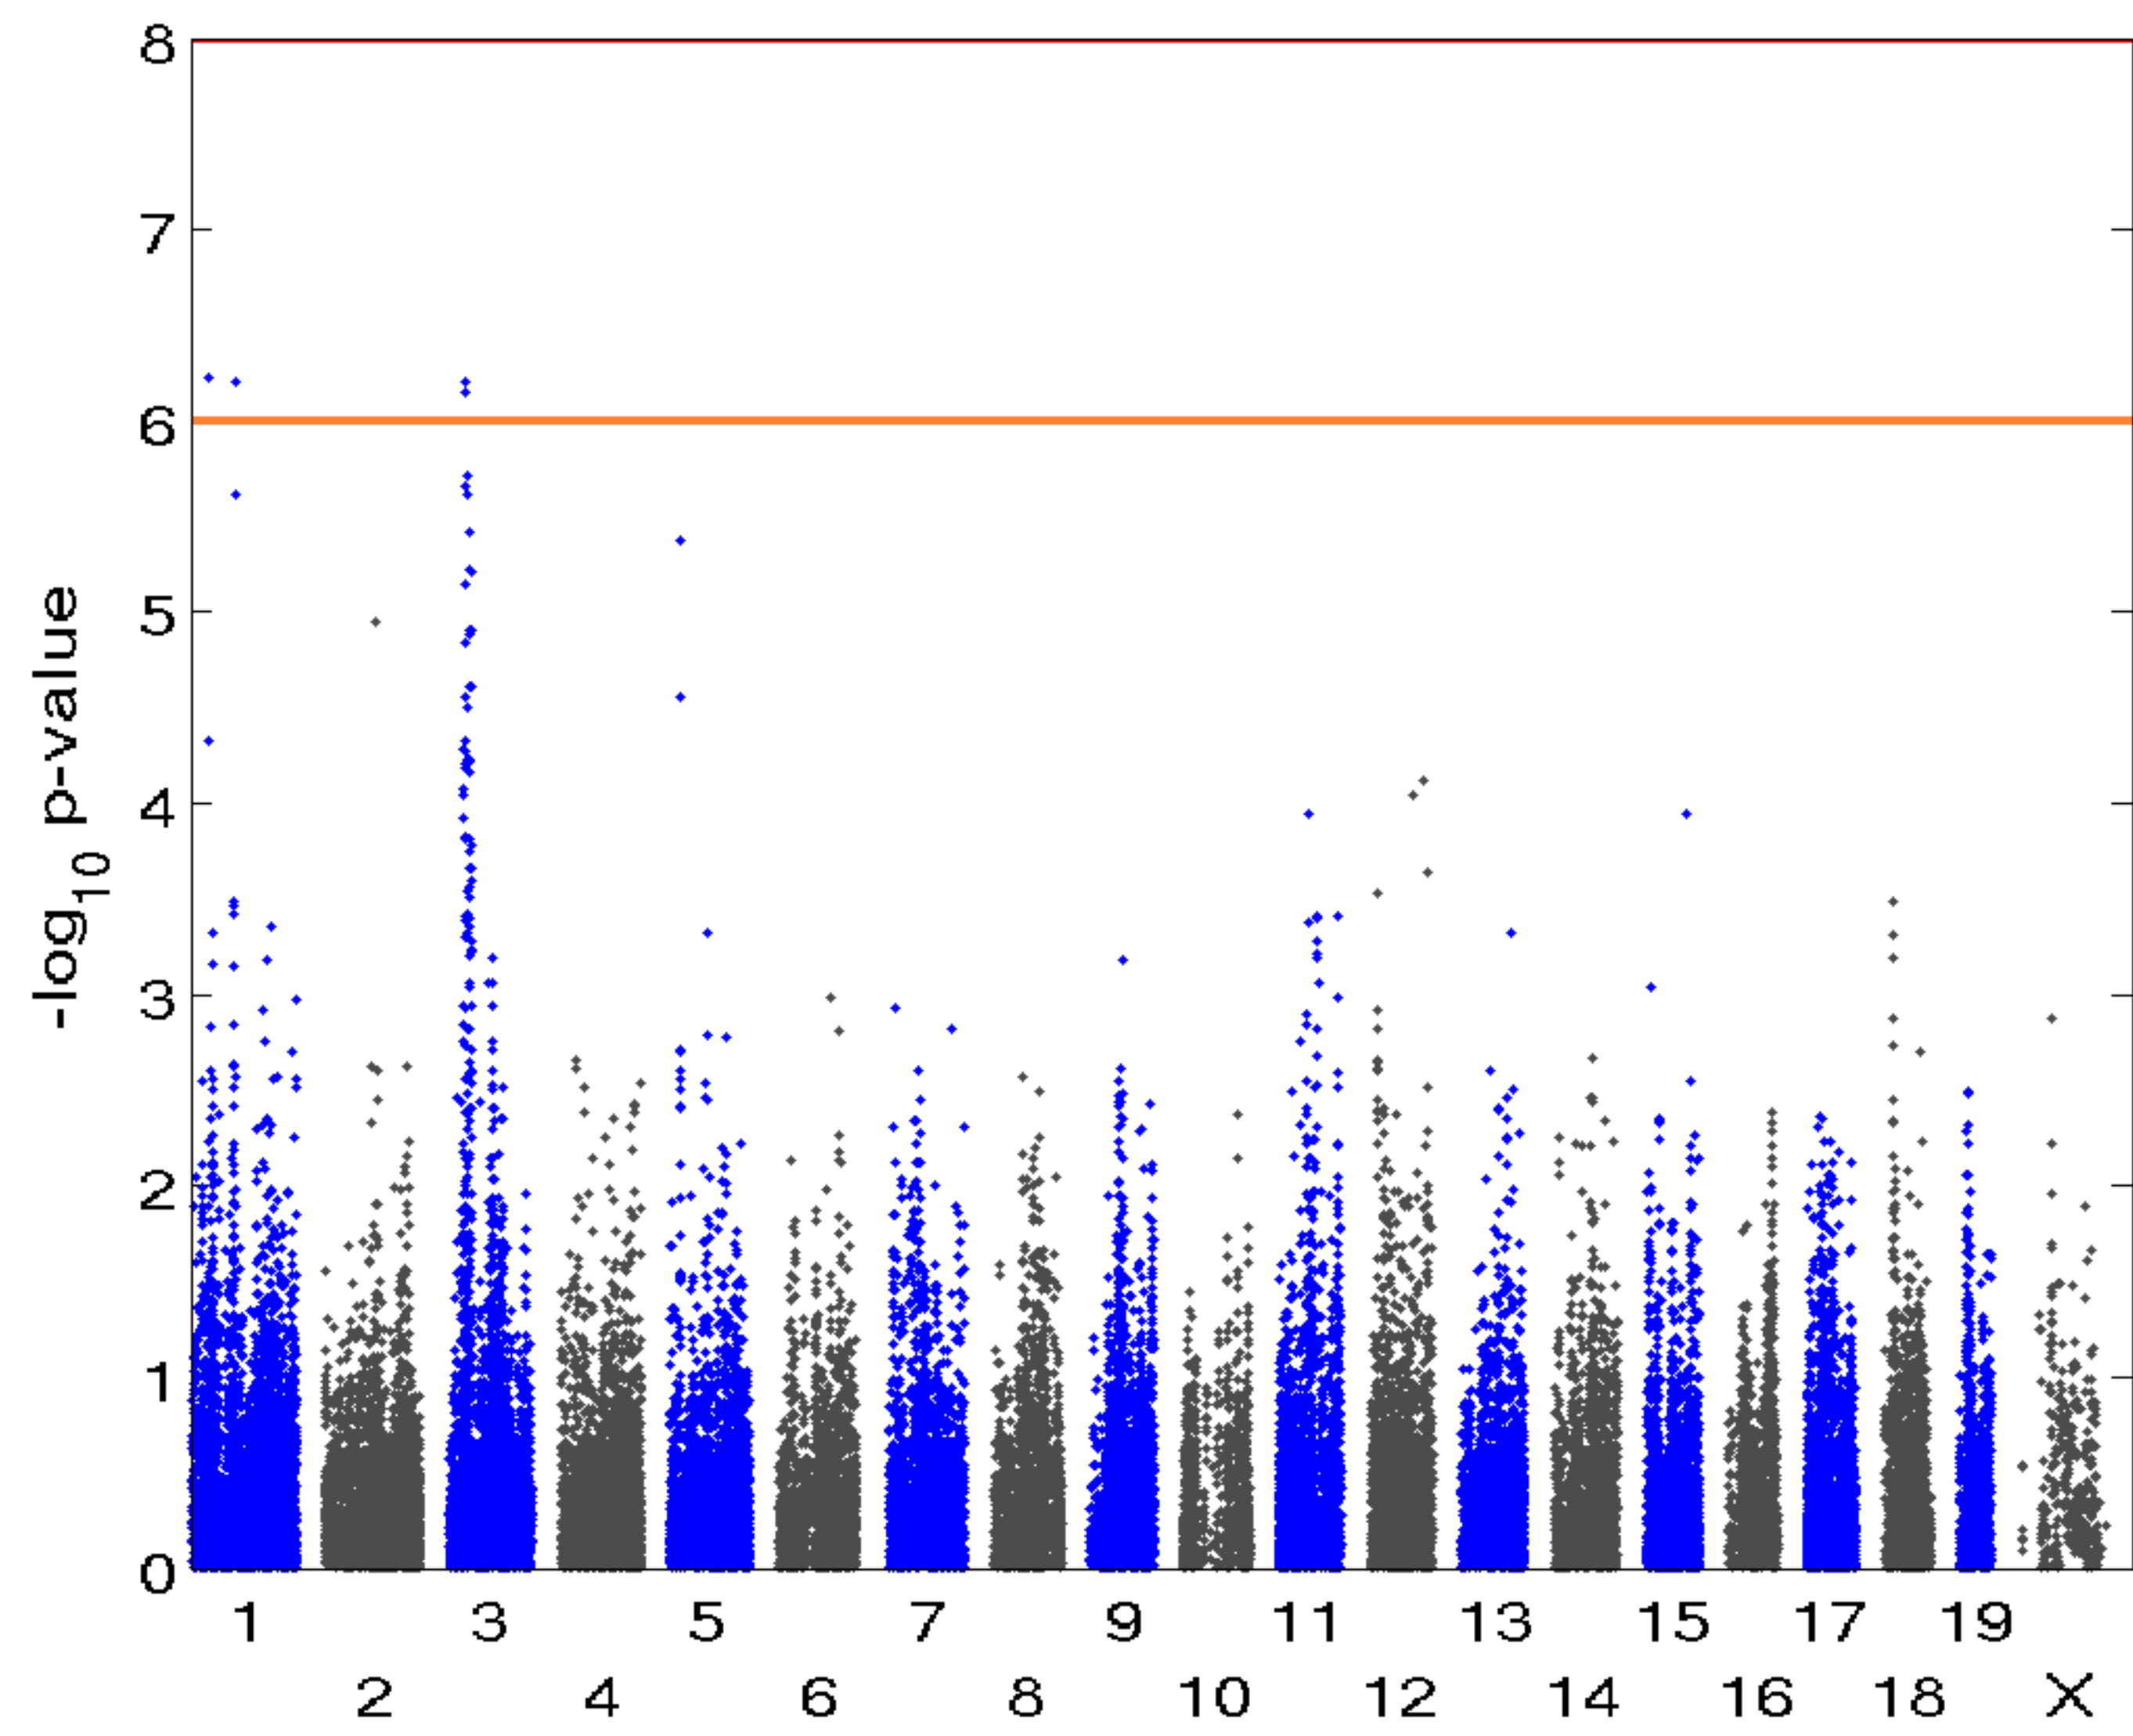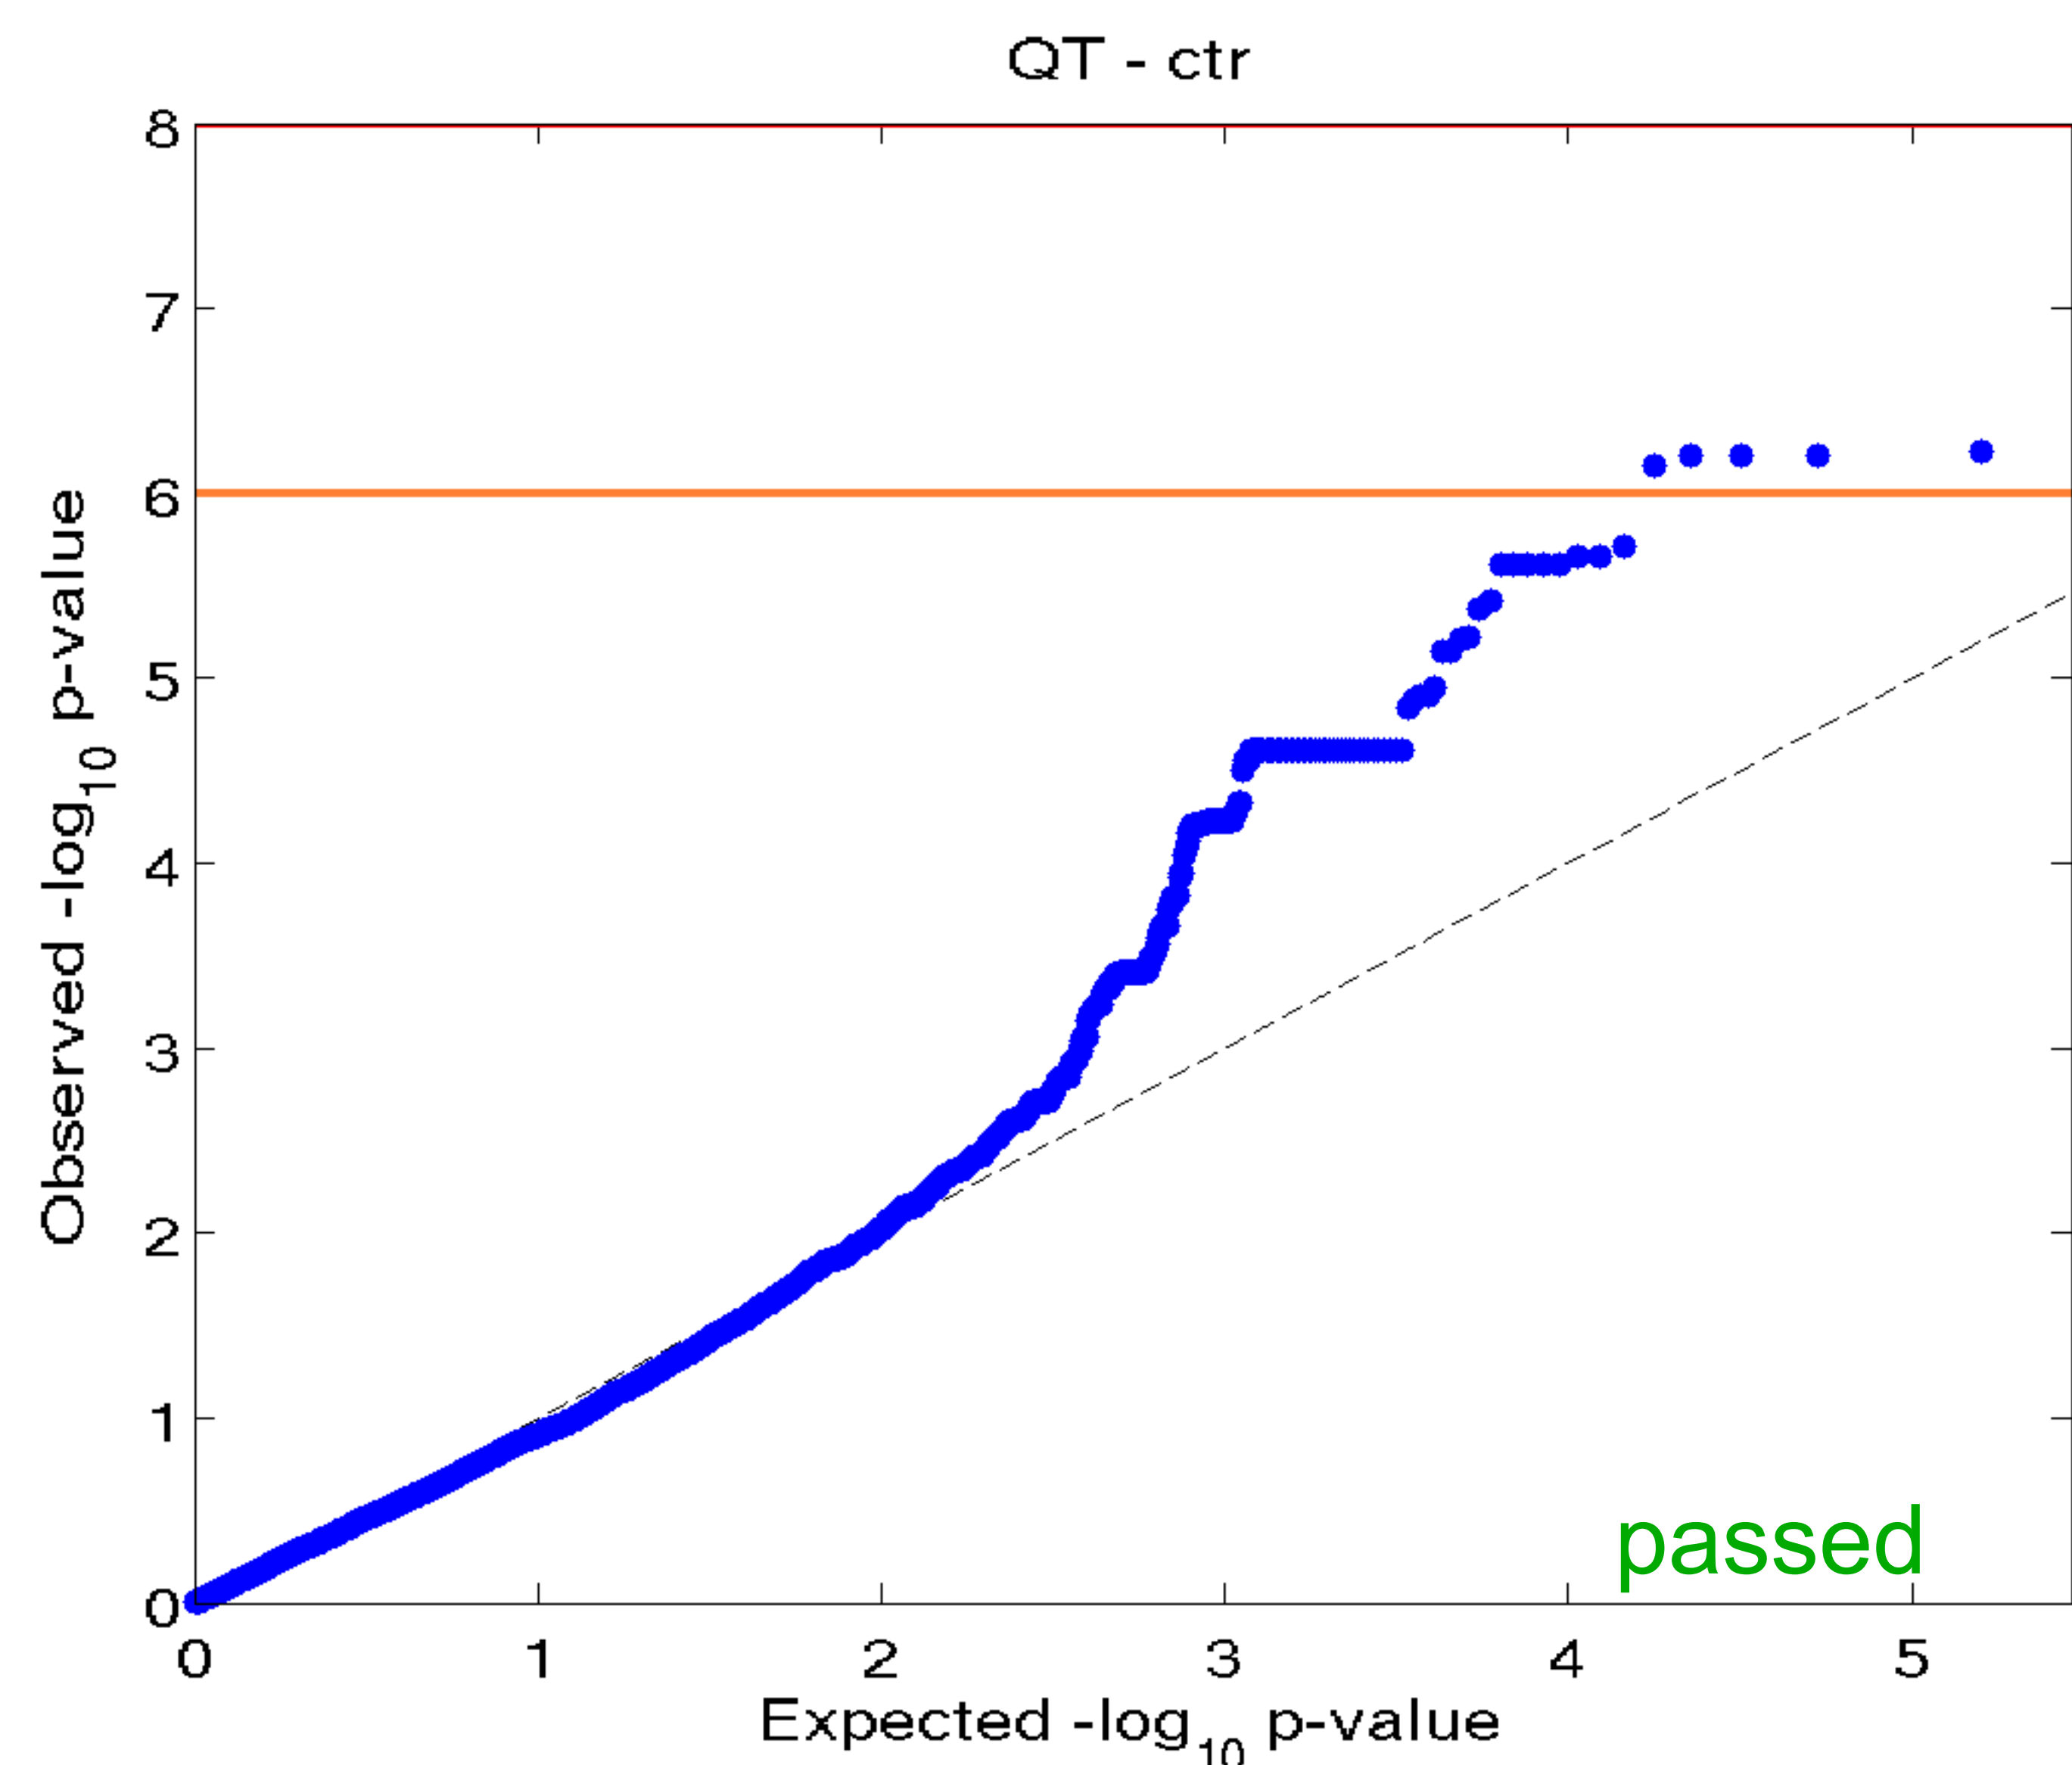

Ramp - ctr

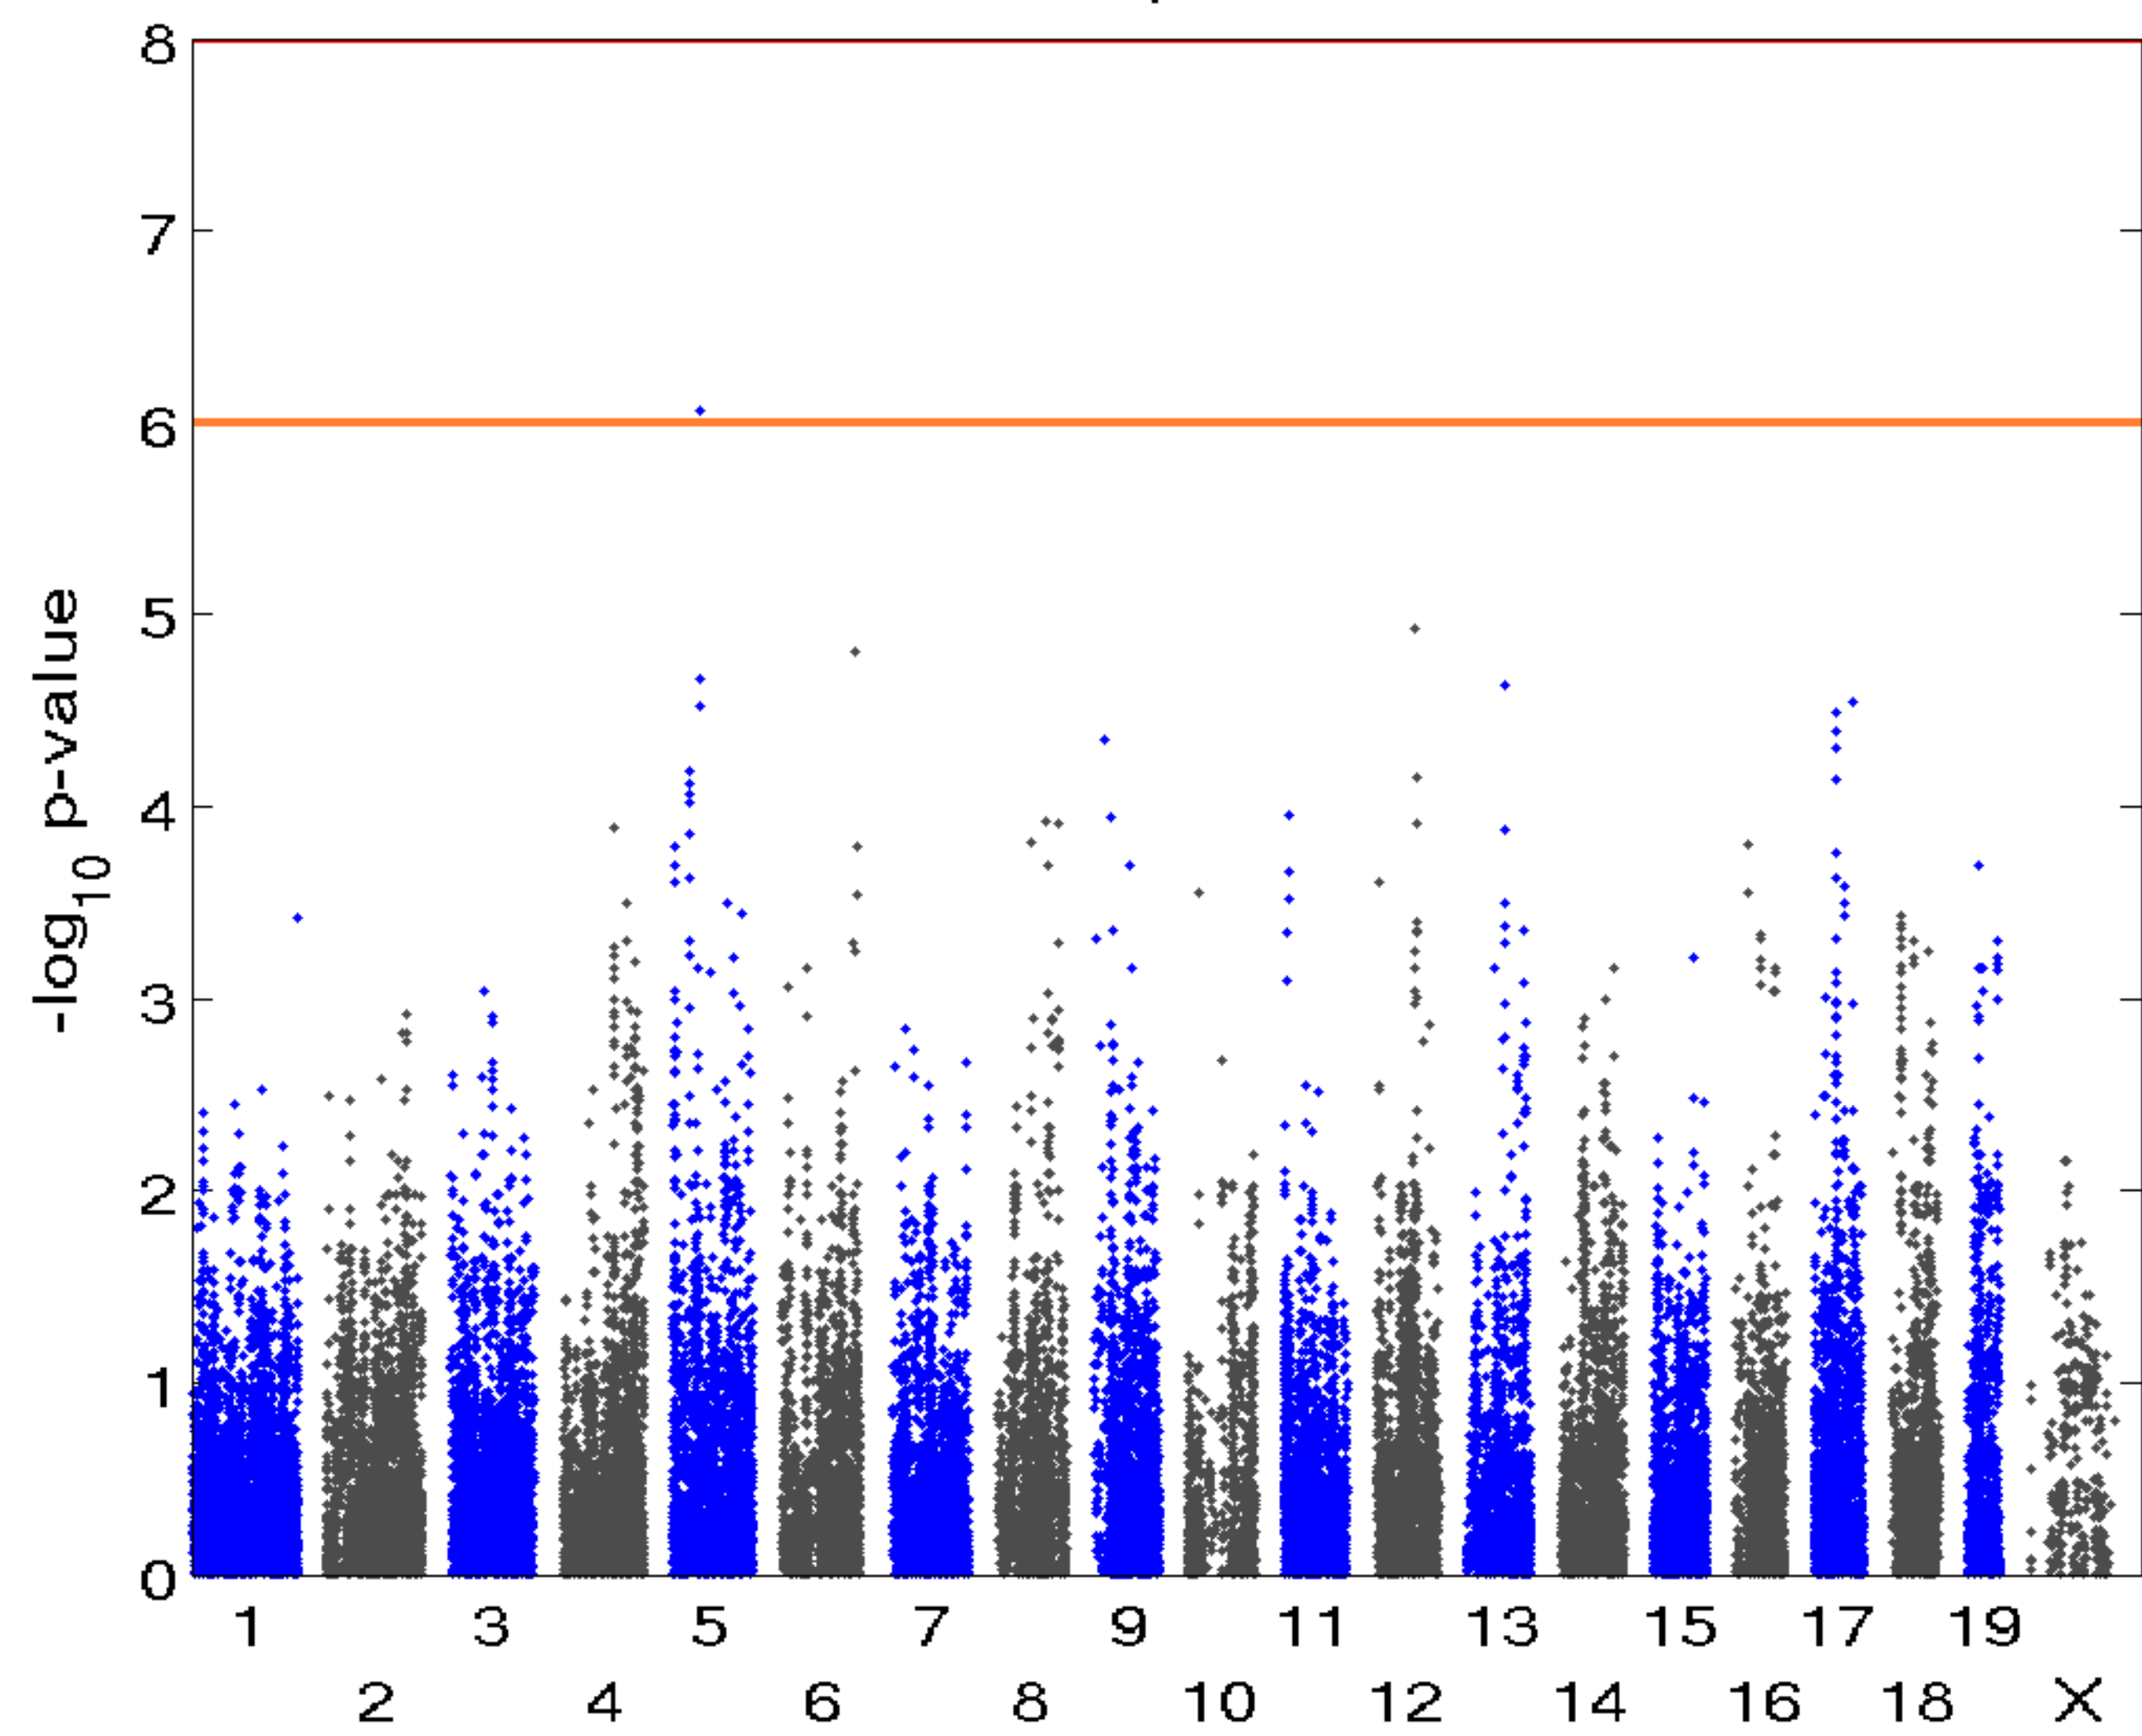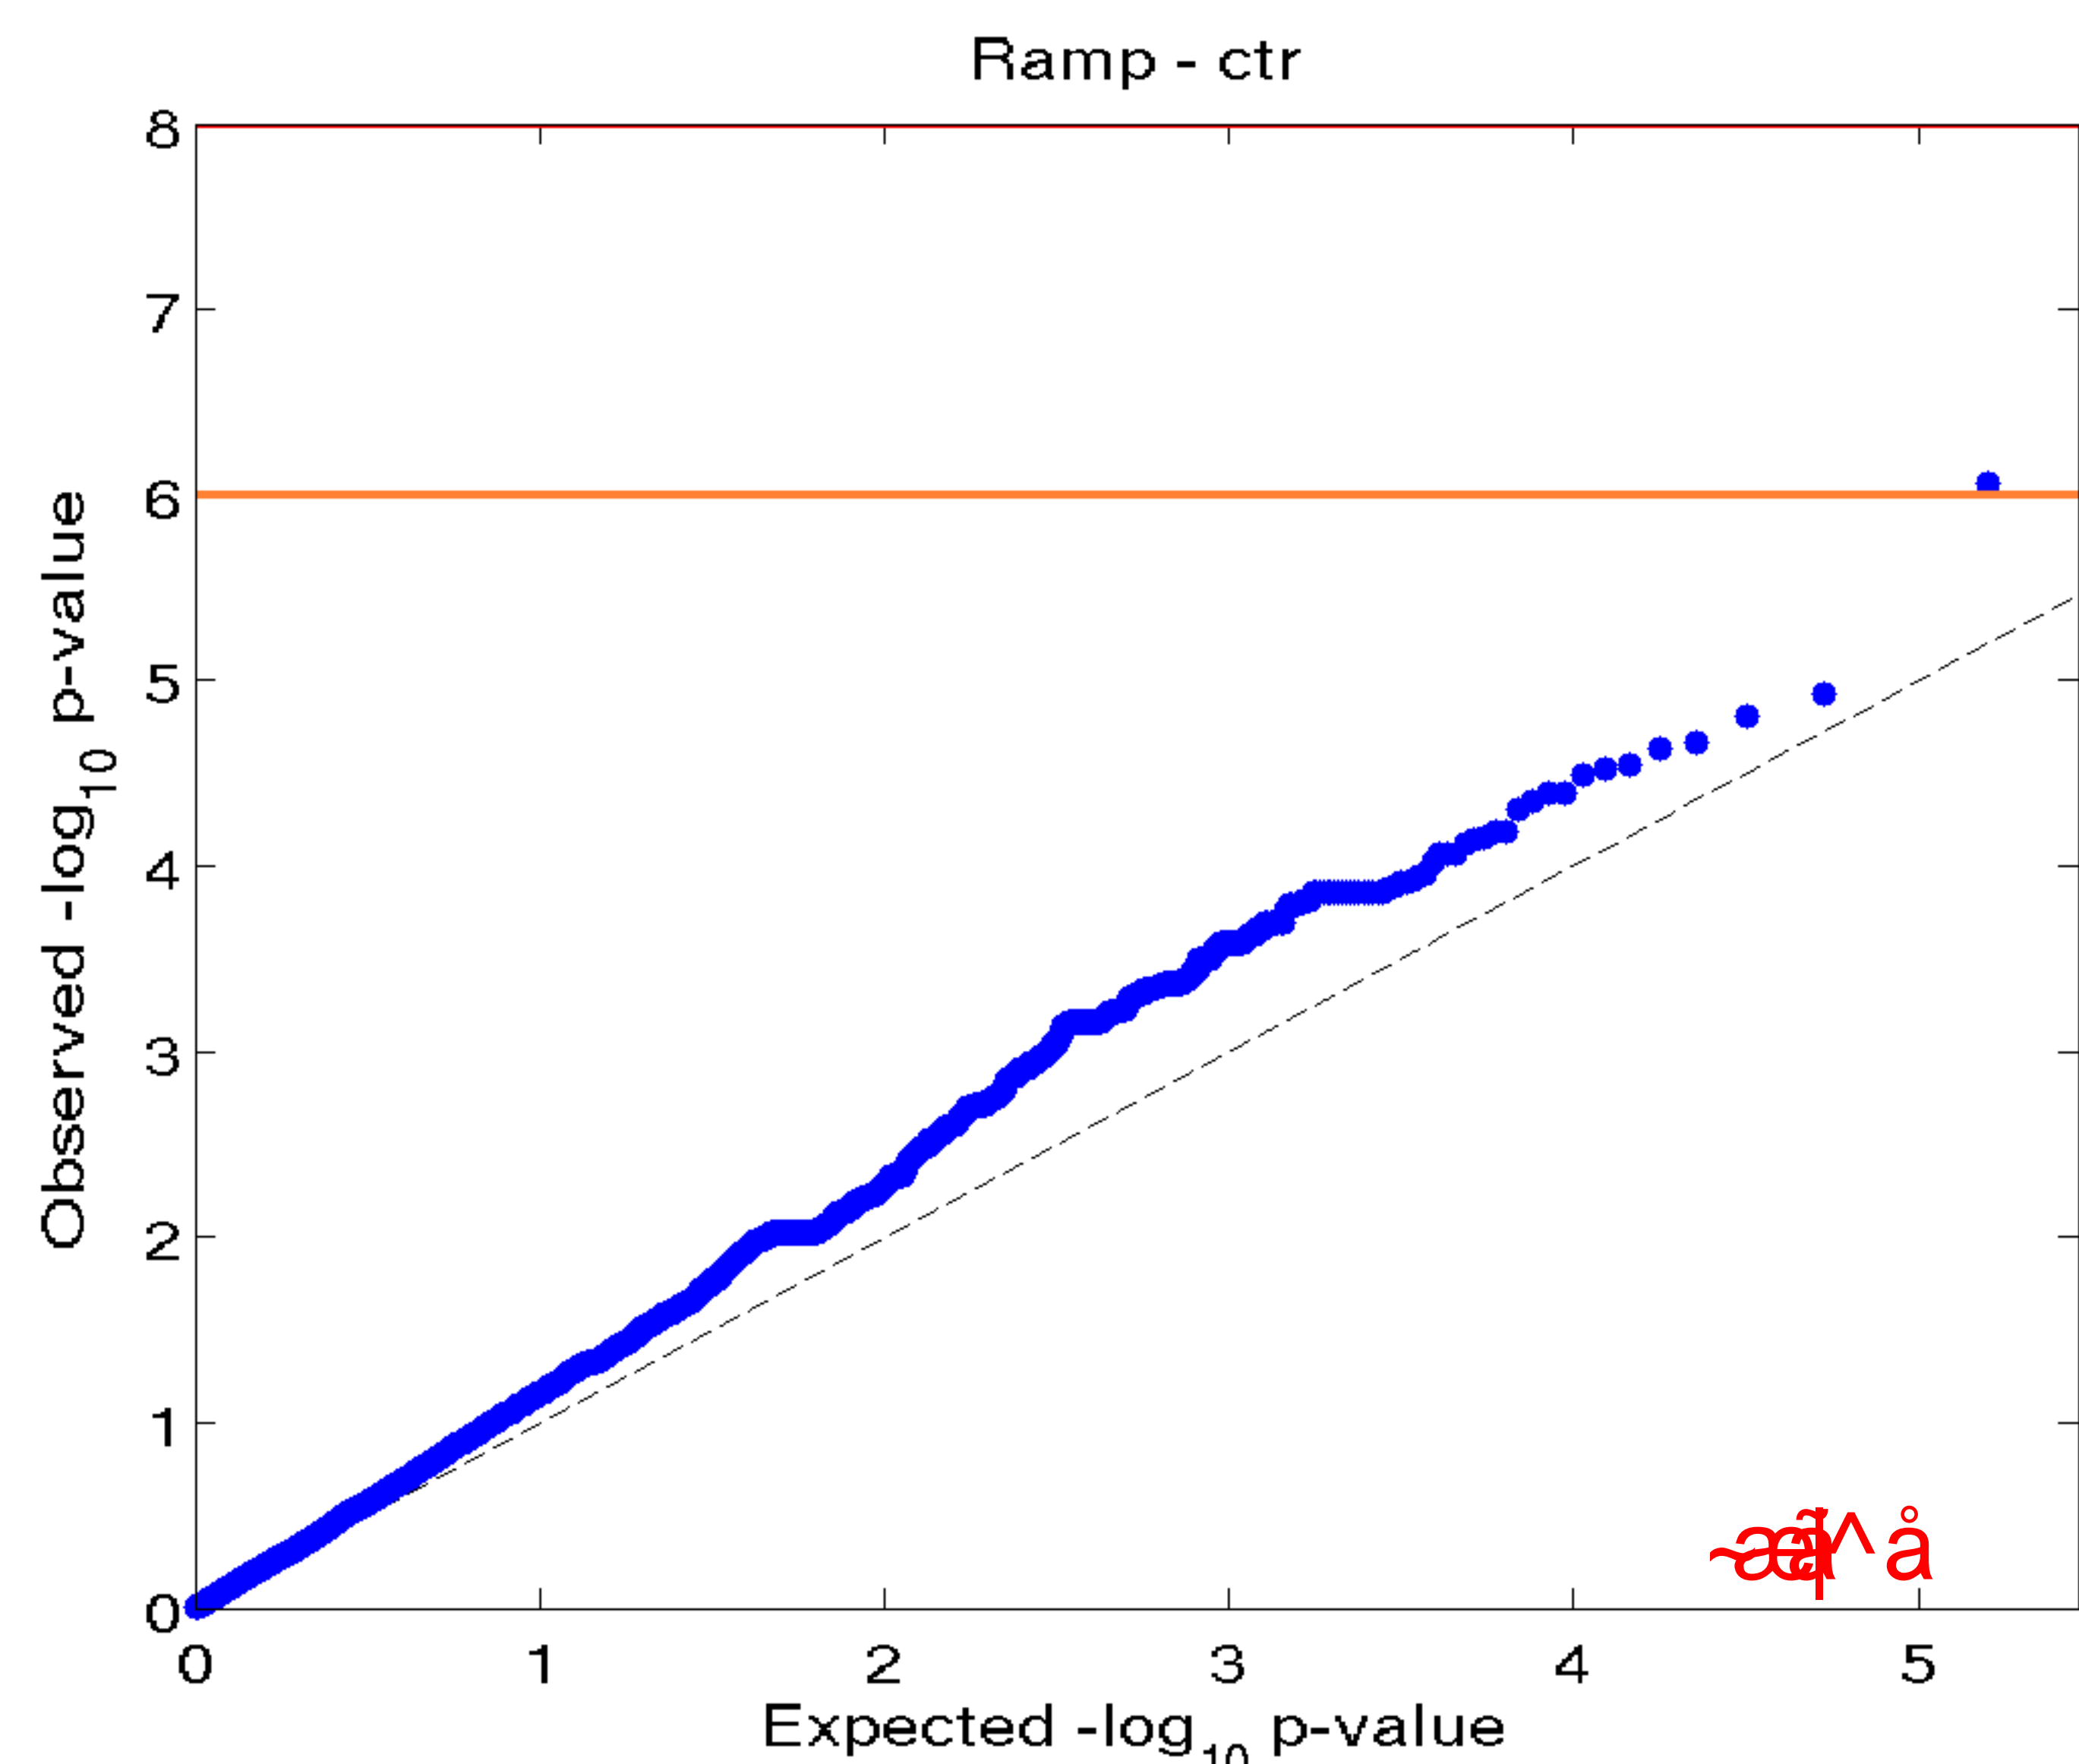

RR - ctr

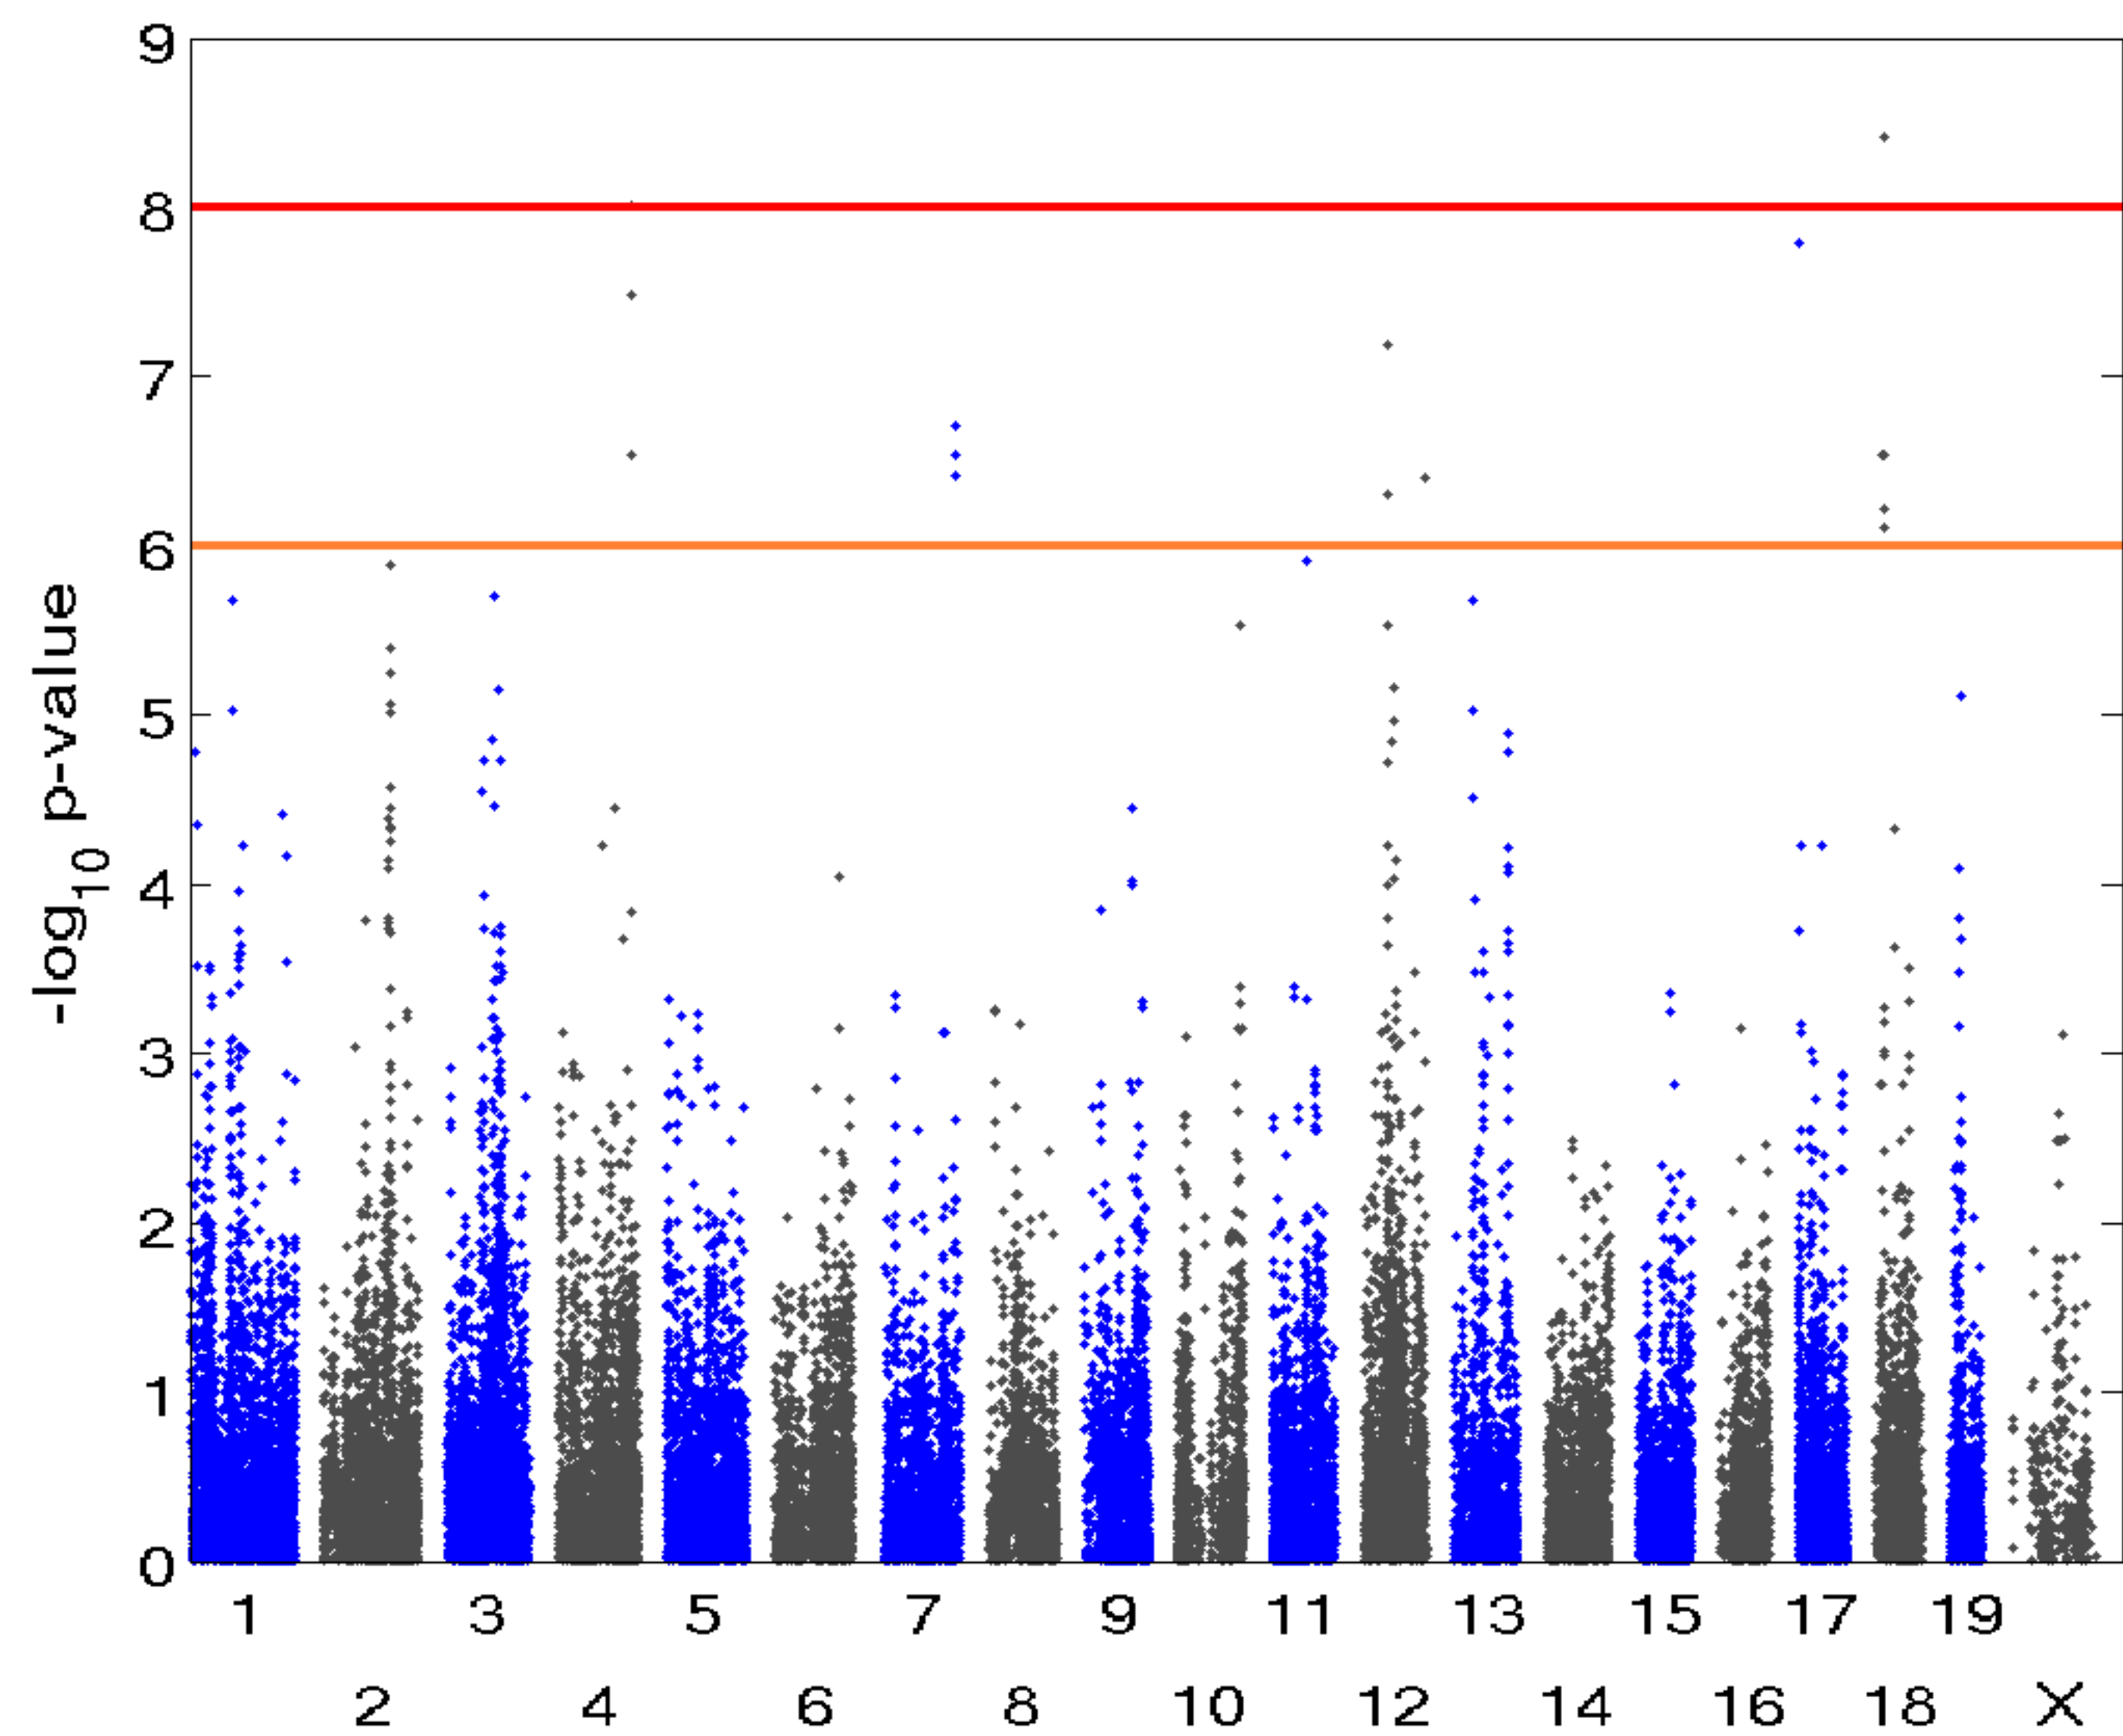

RR - ctr

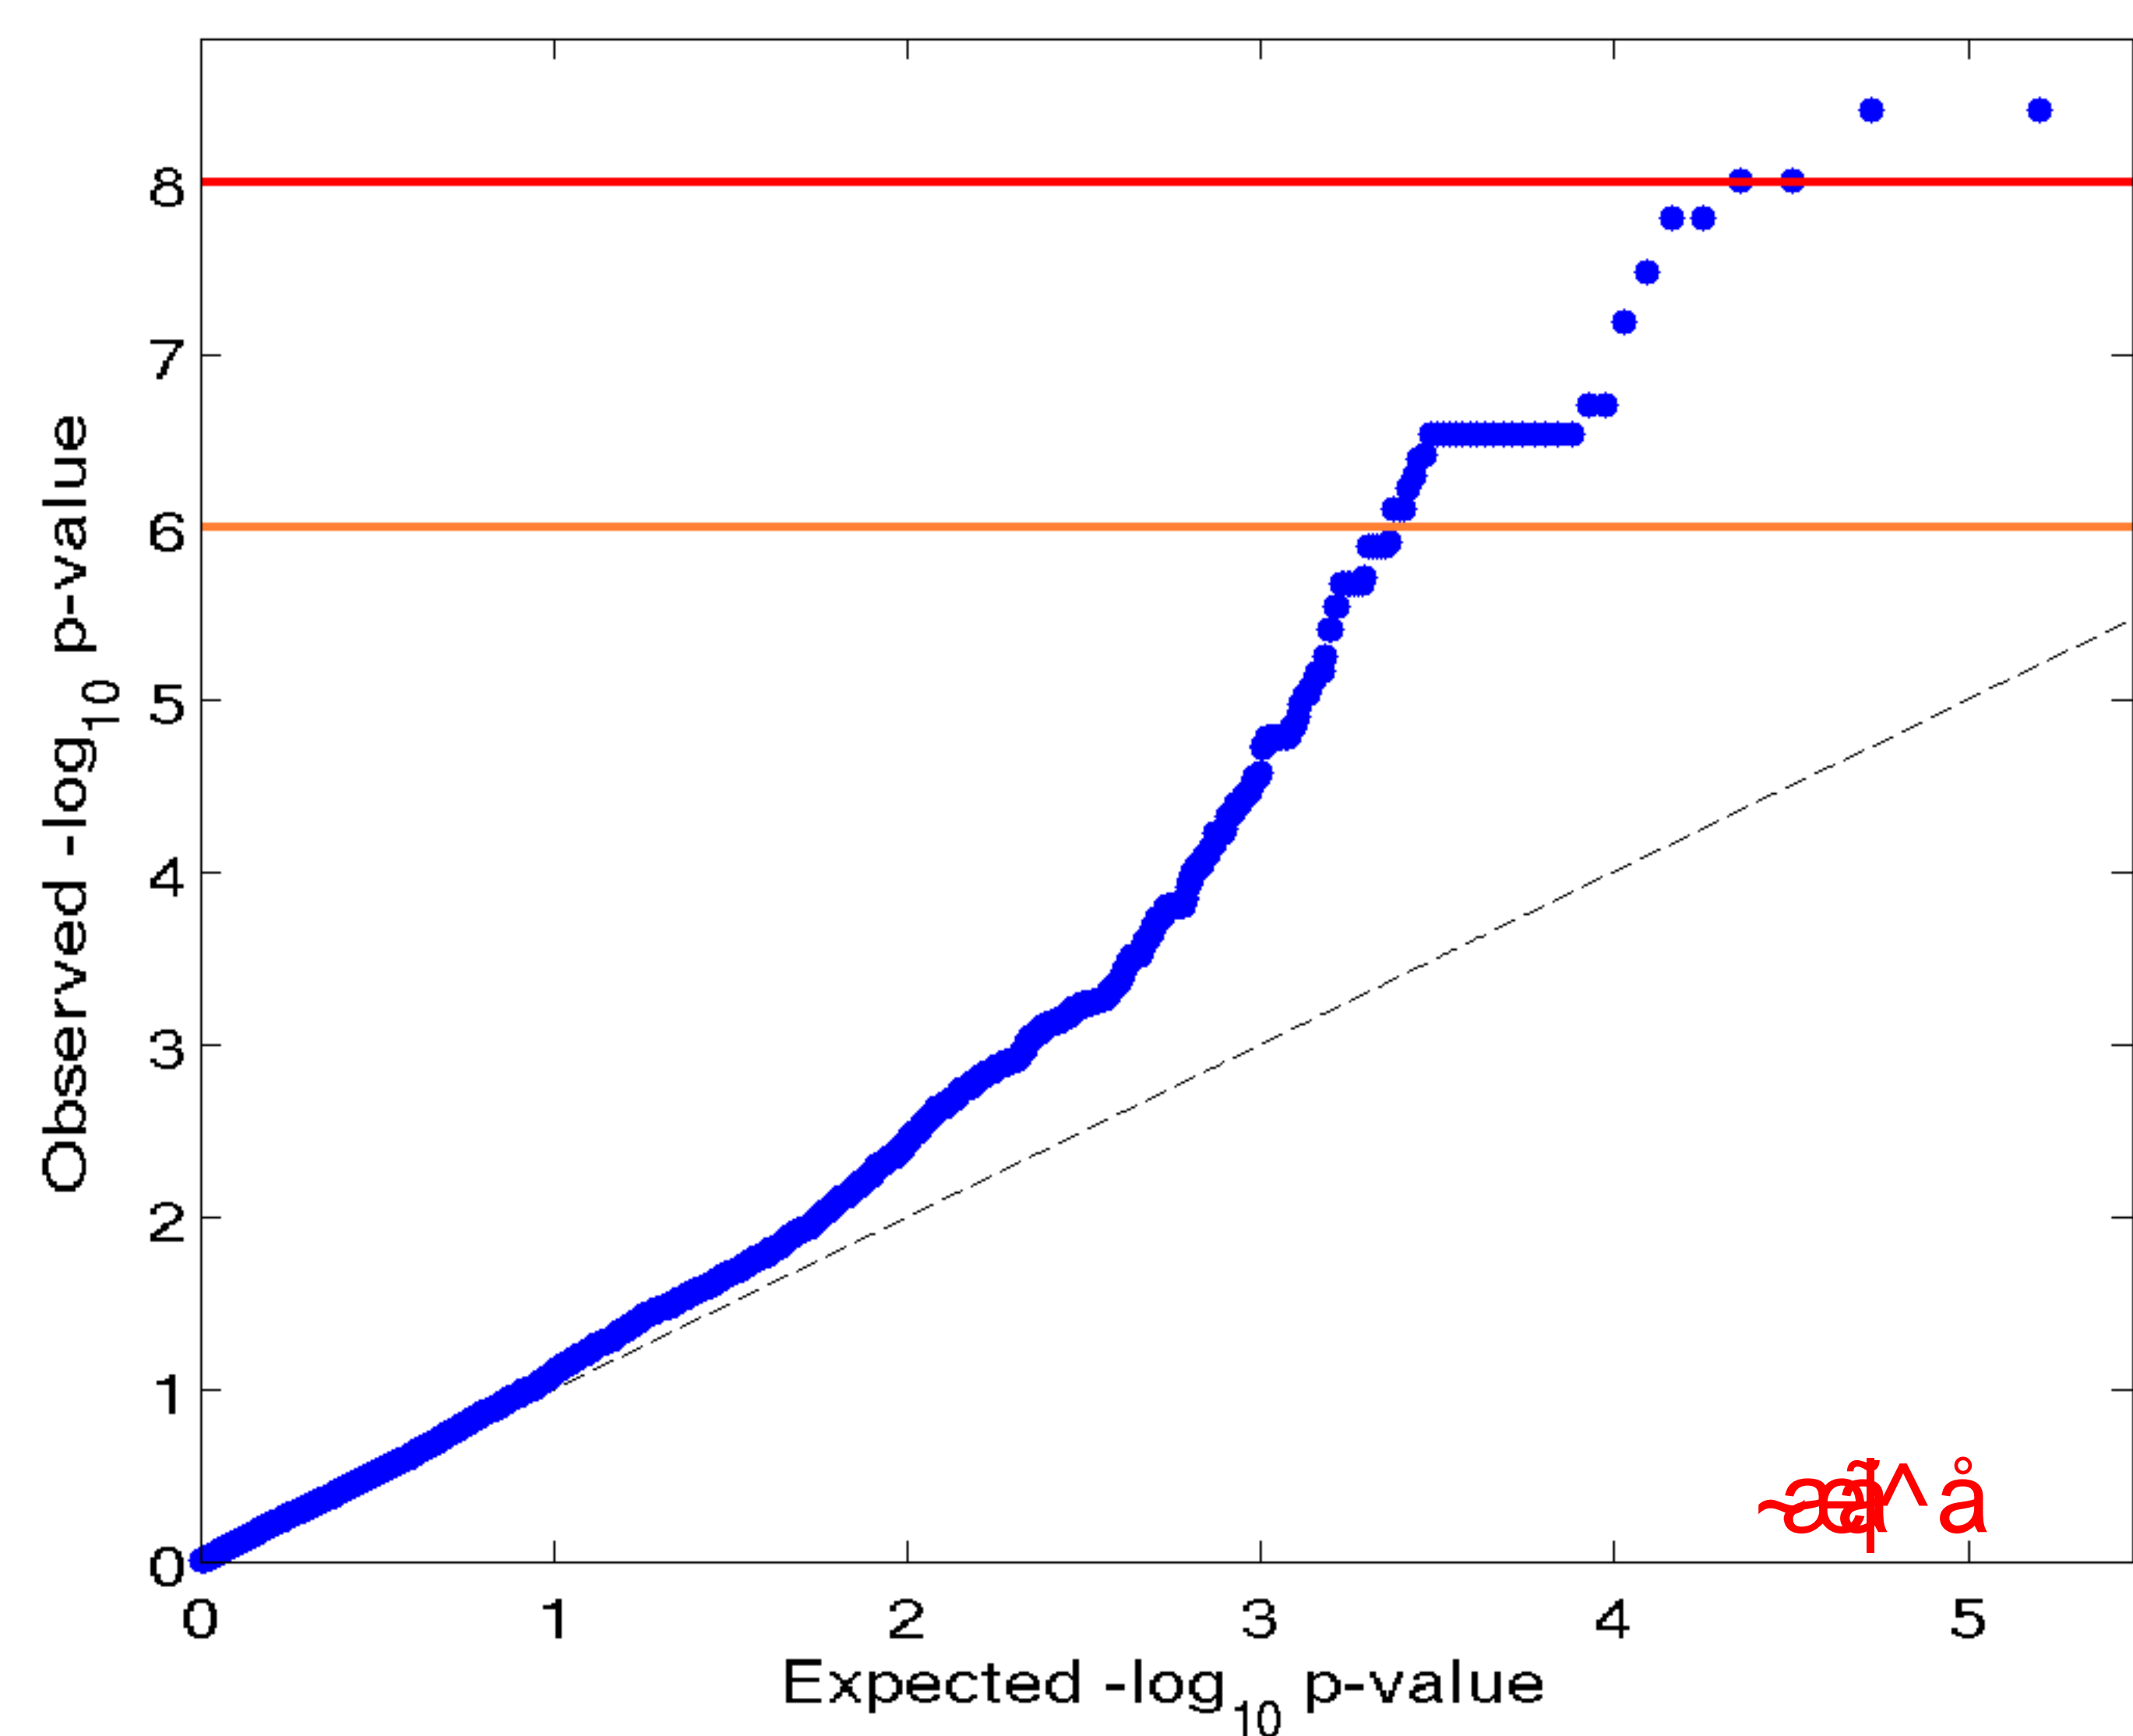



Samp - ctr

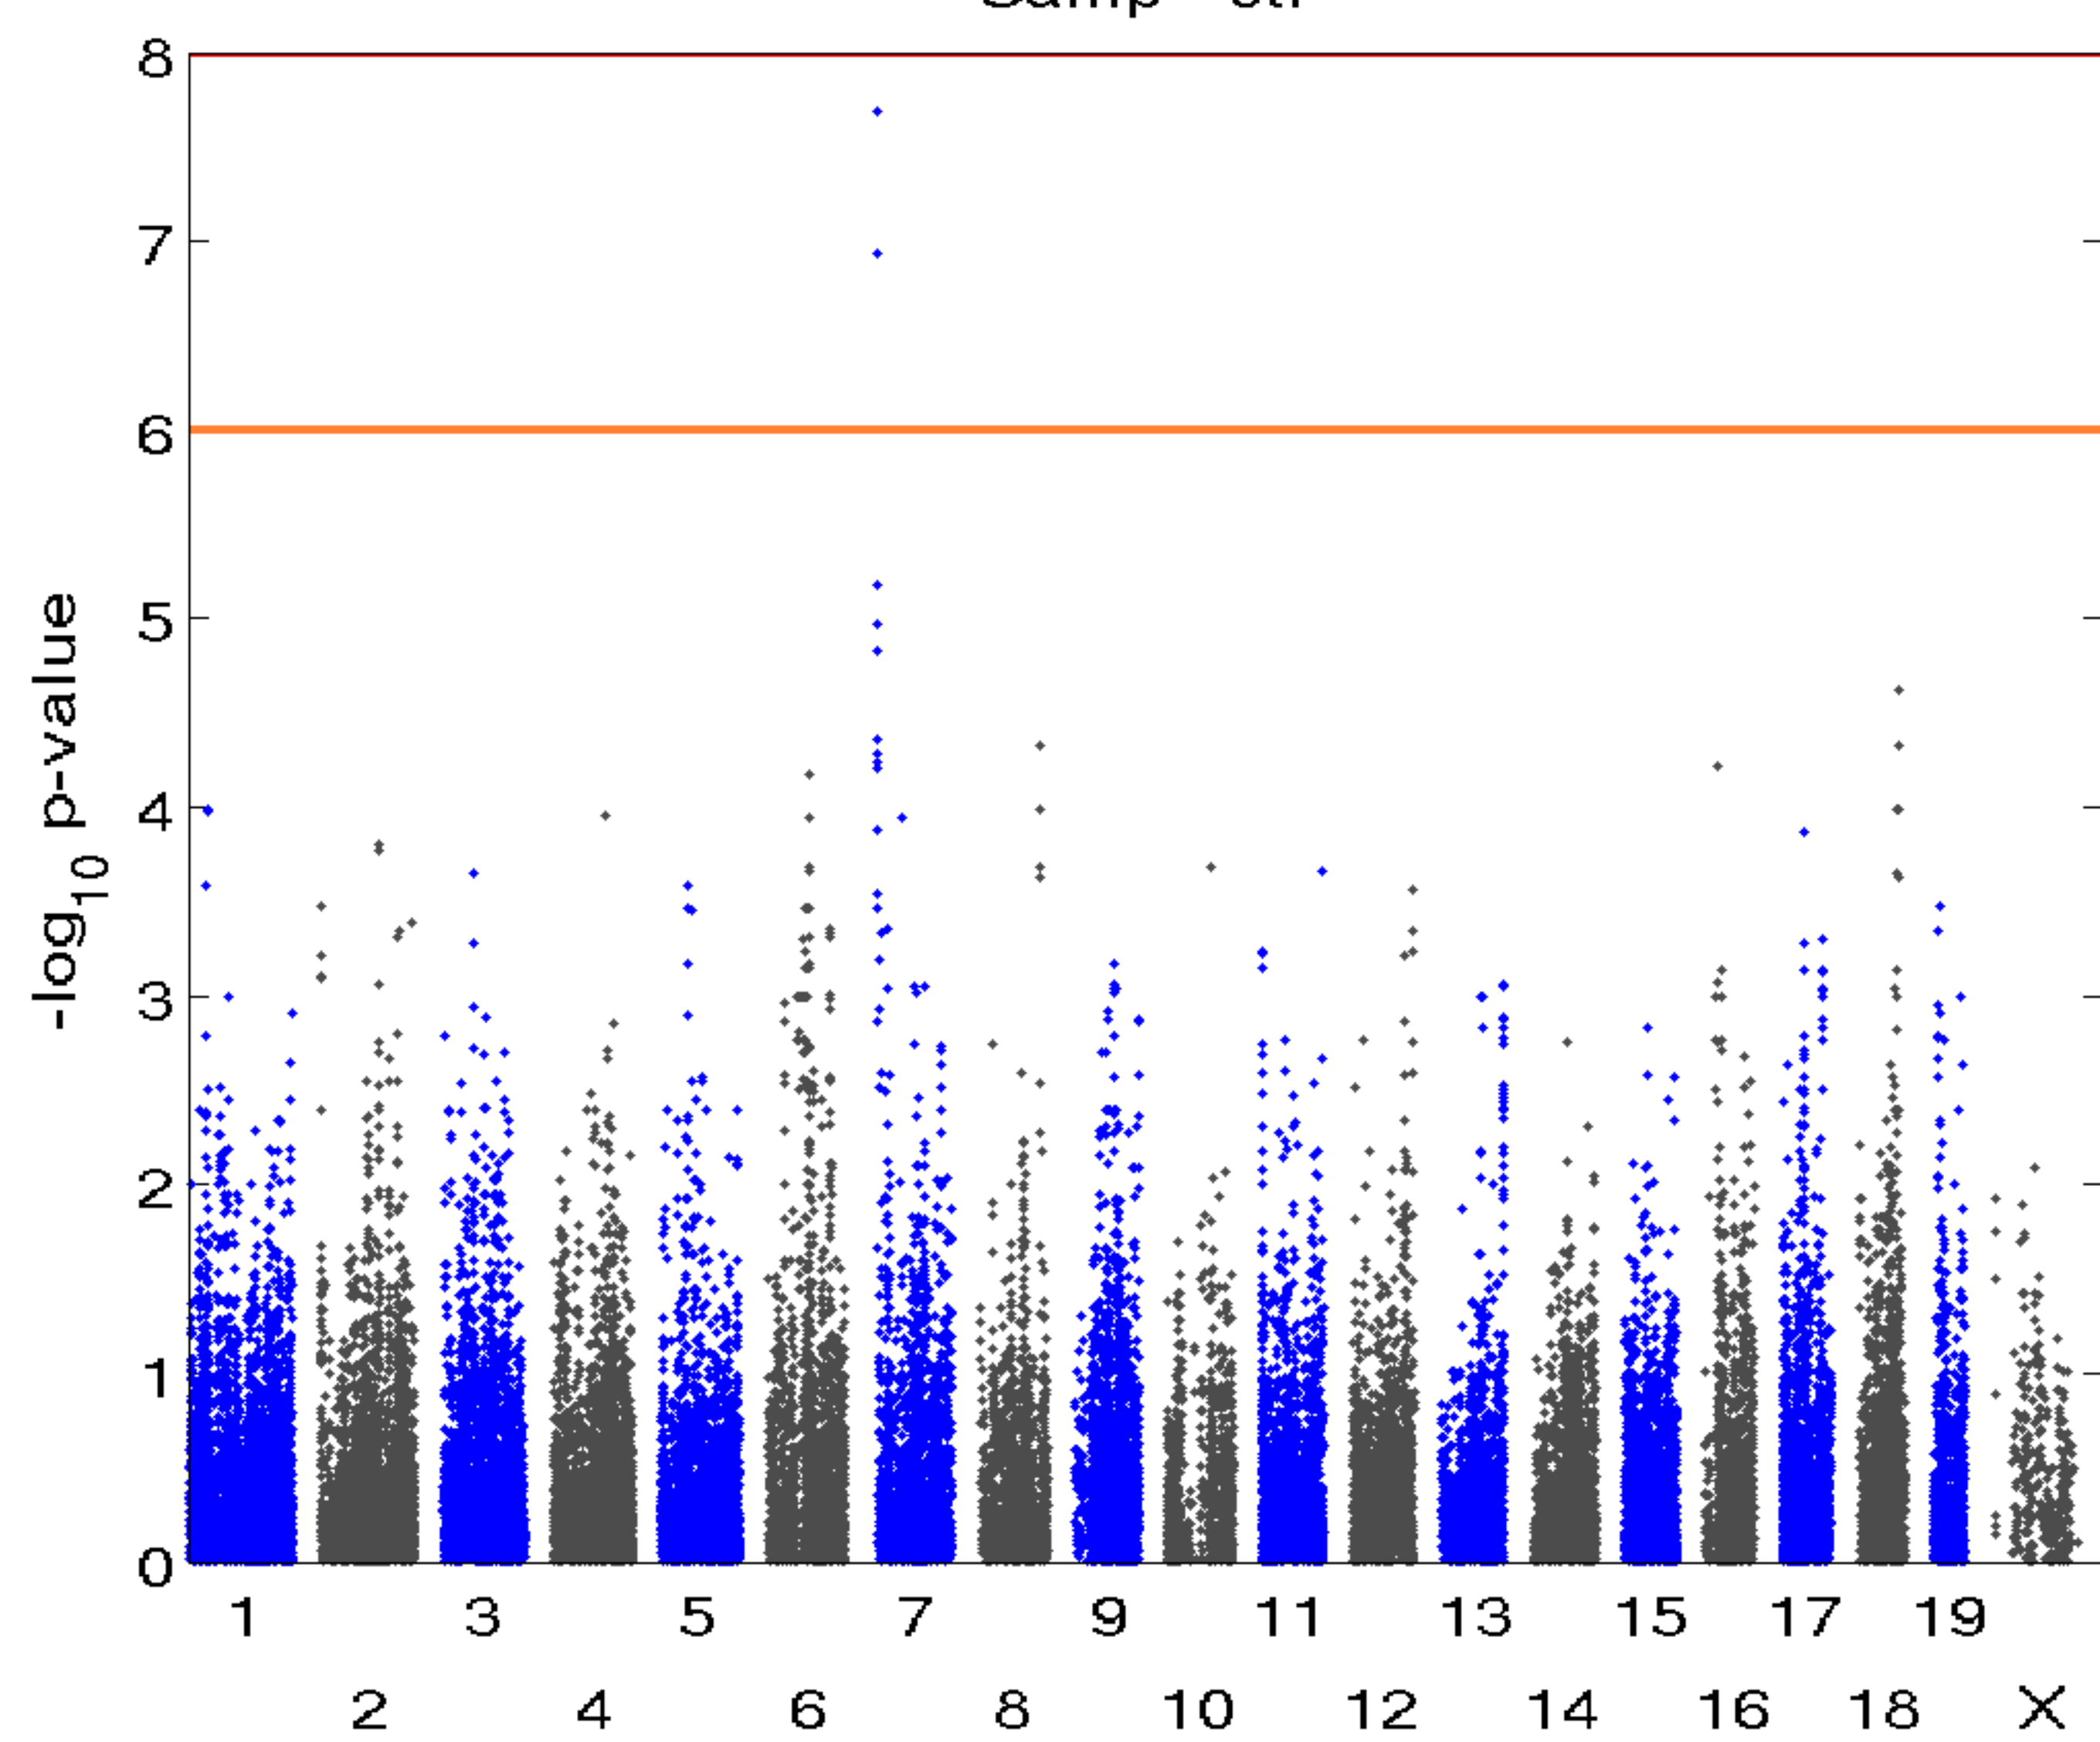

Samp - ctr

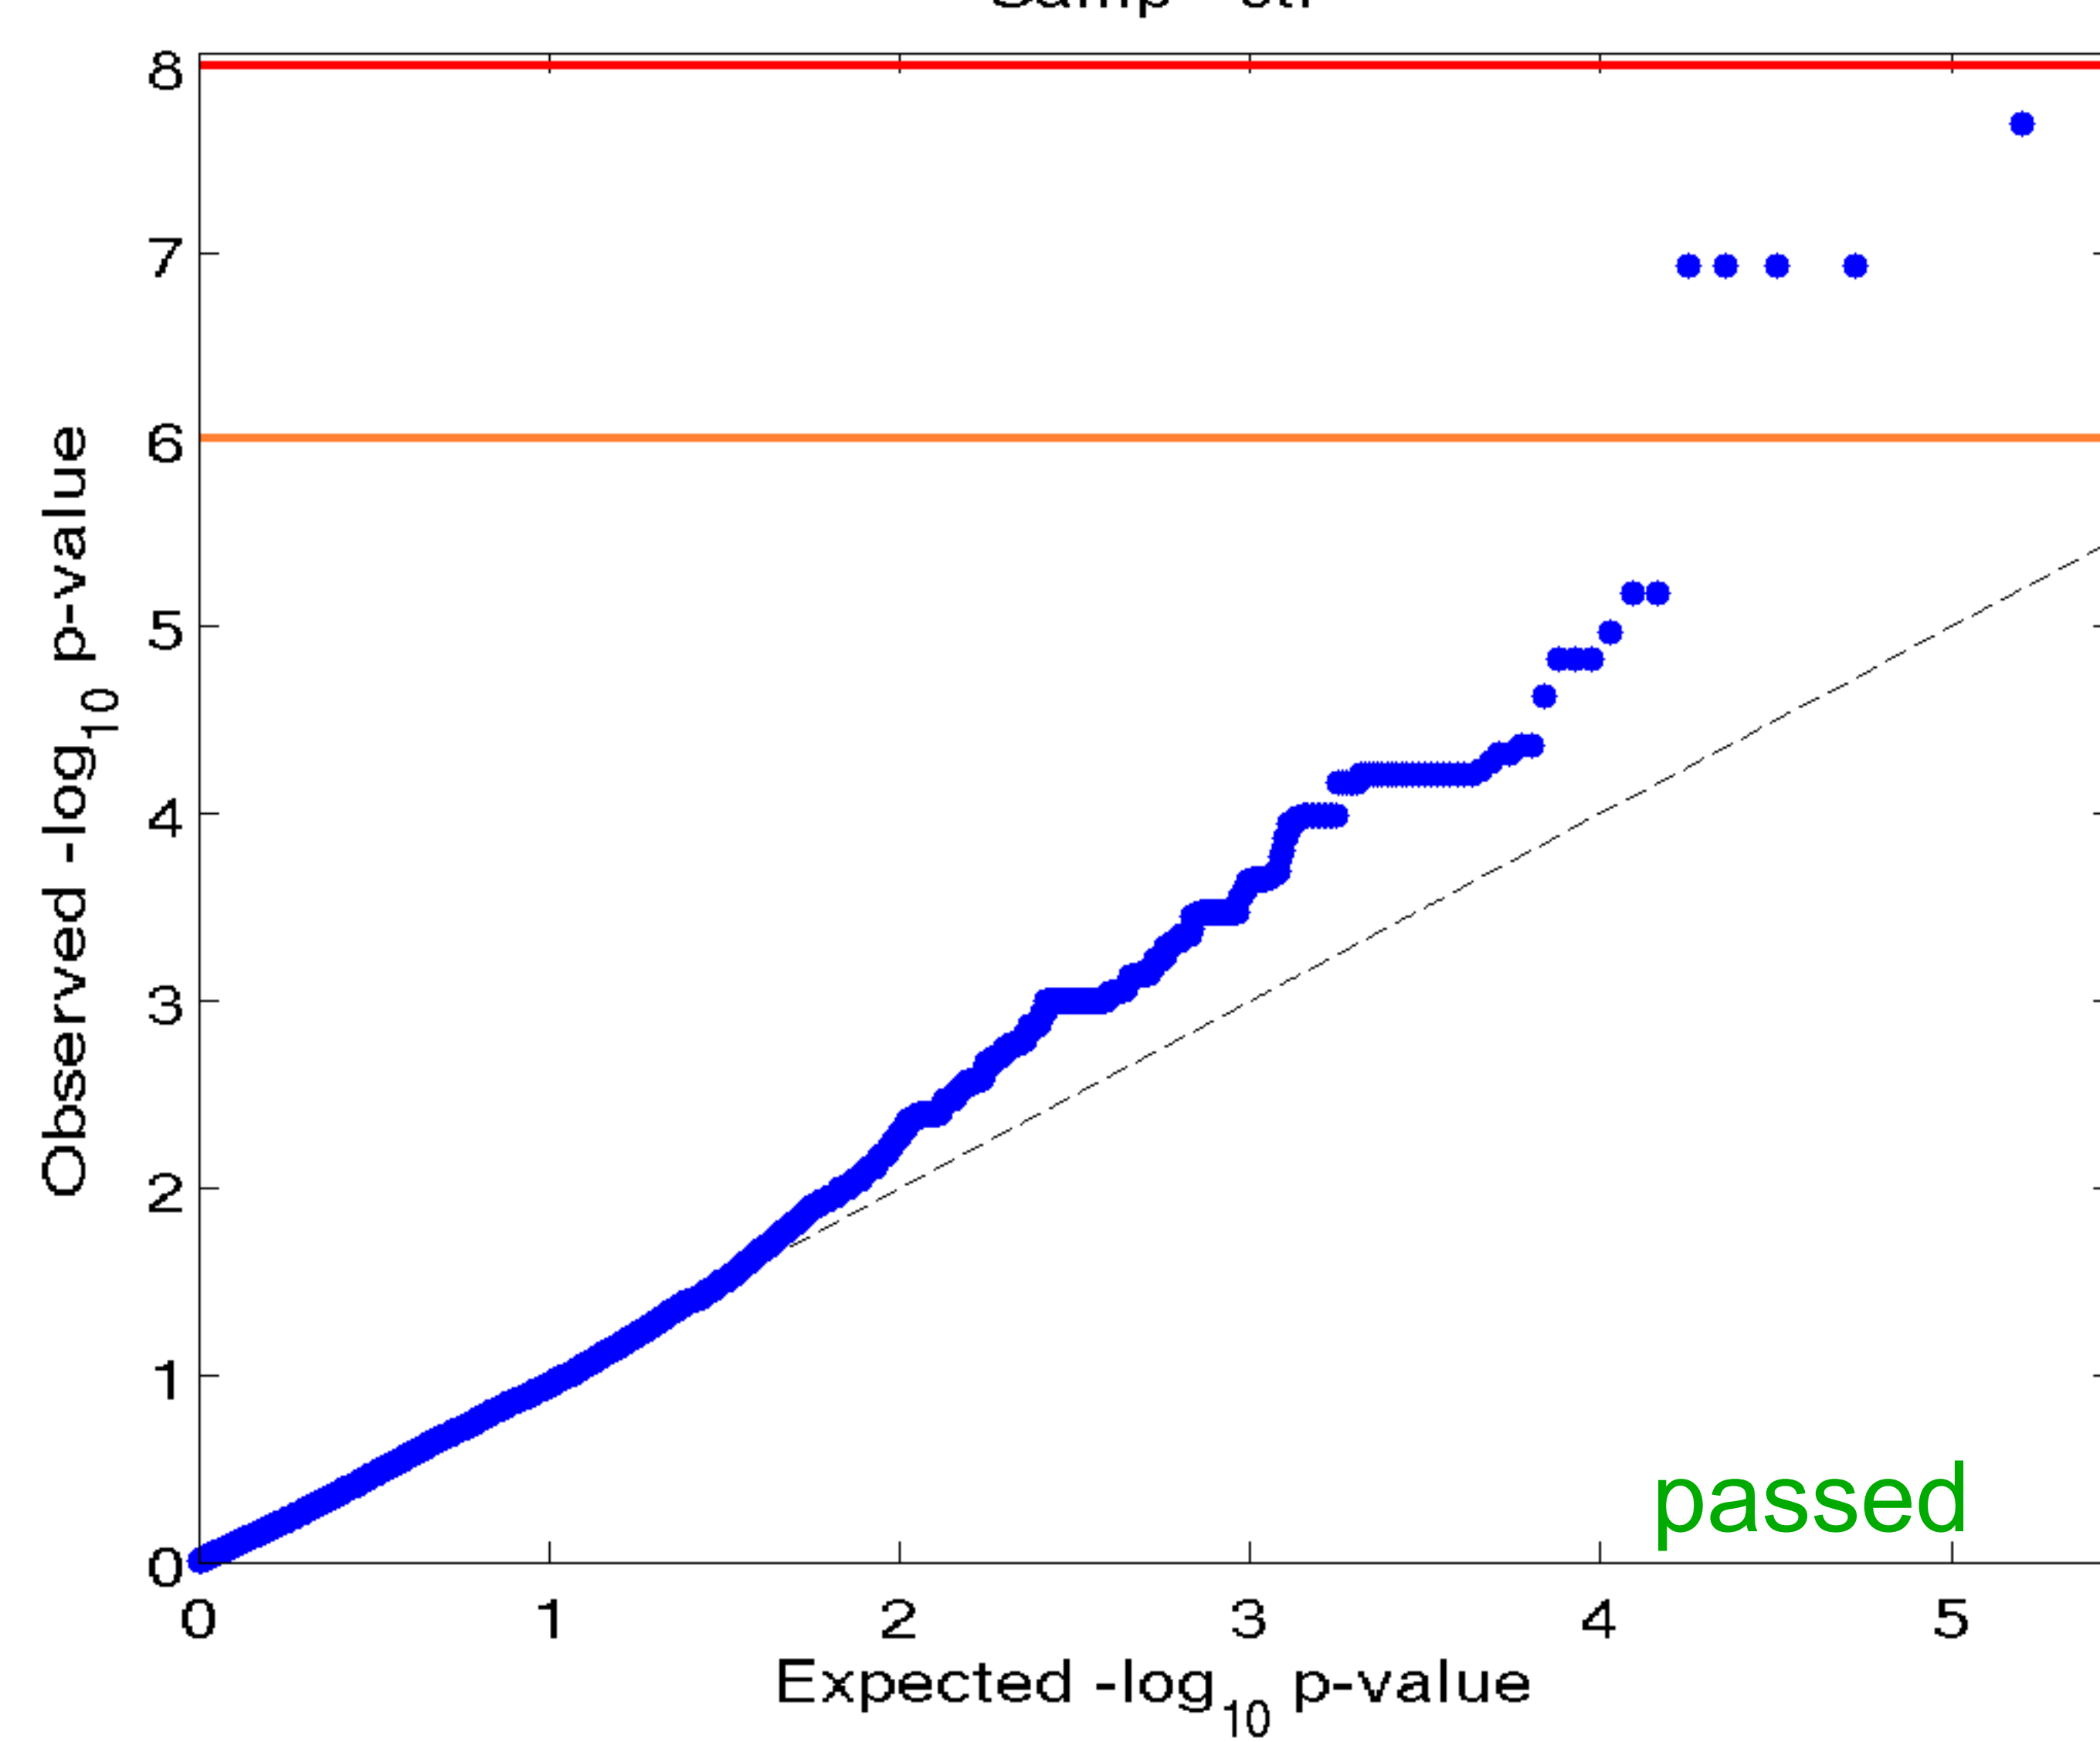

SBP - ctr

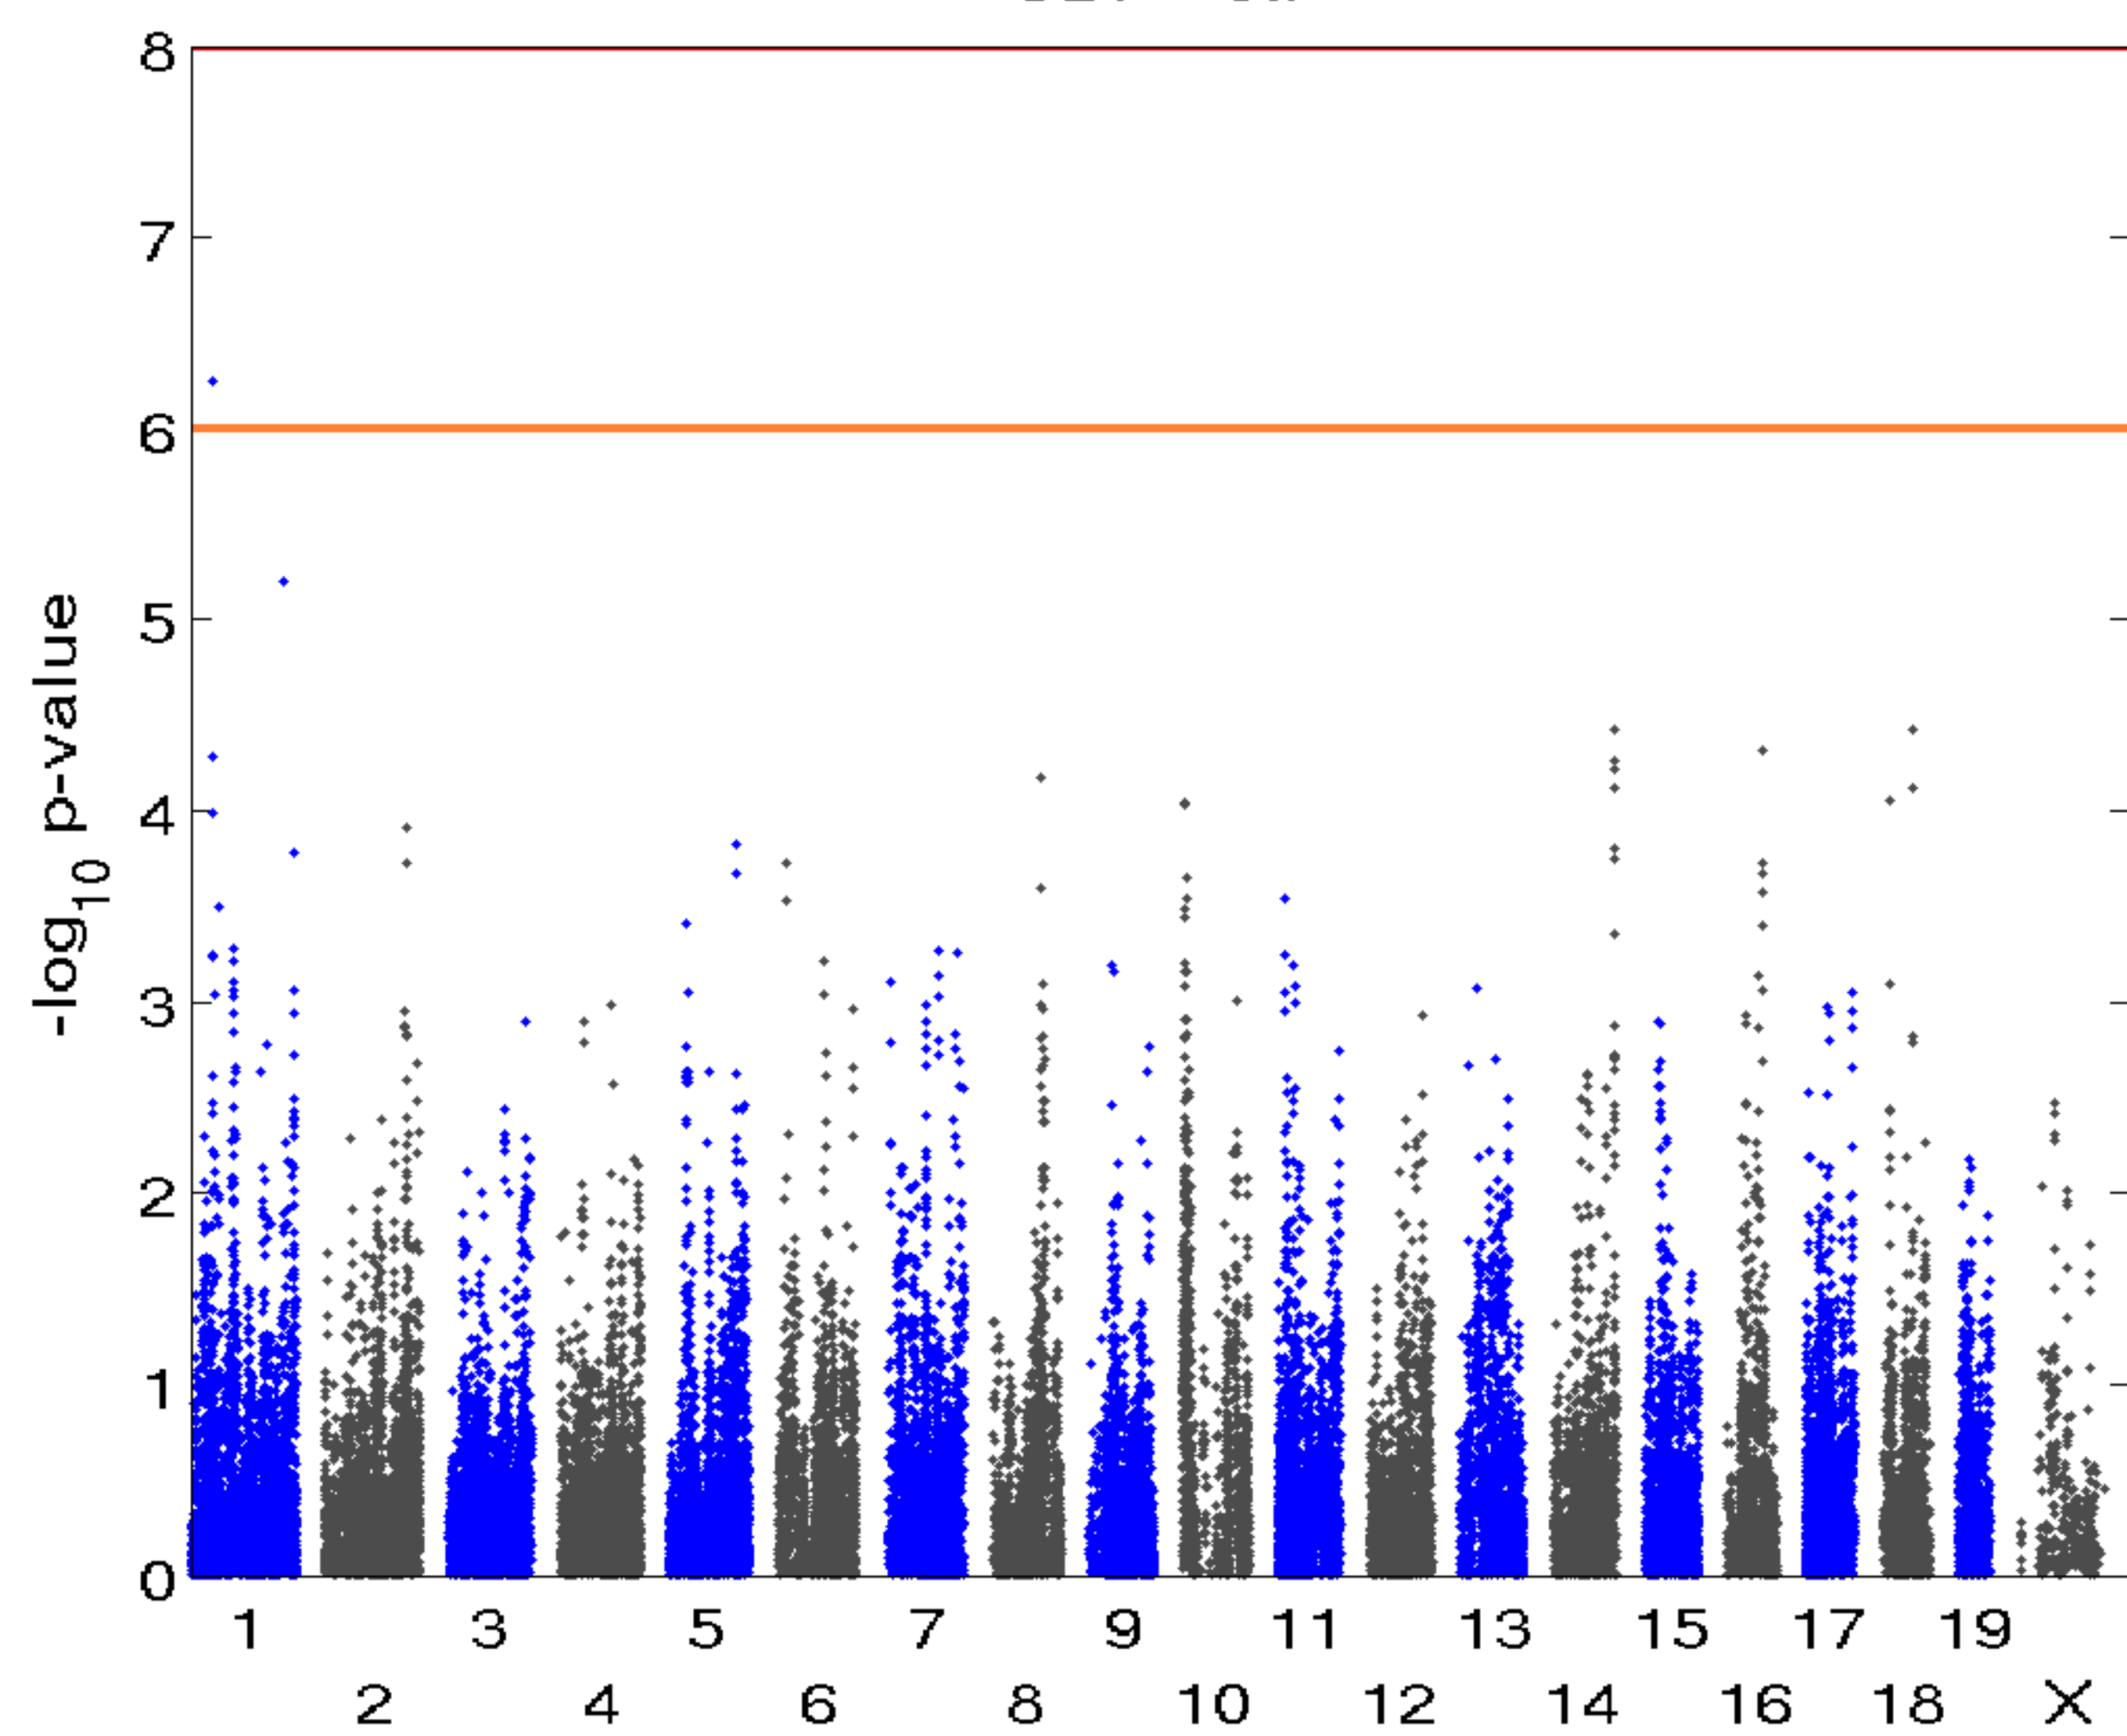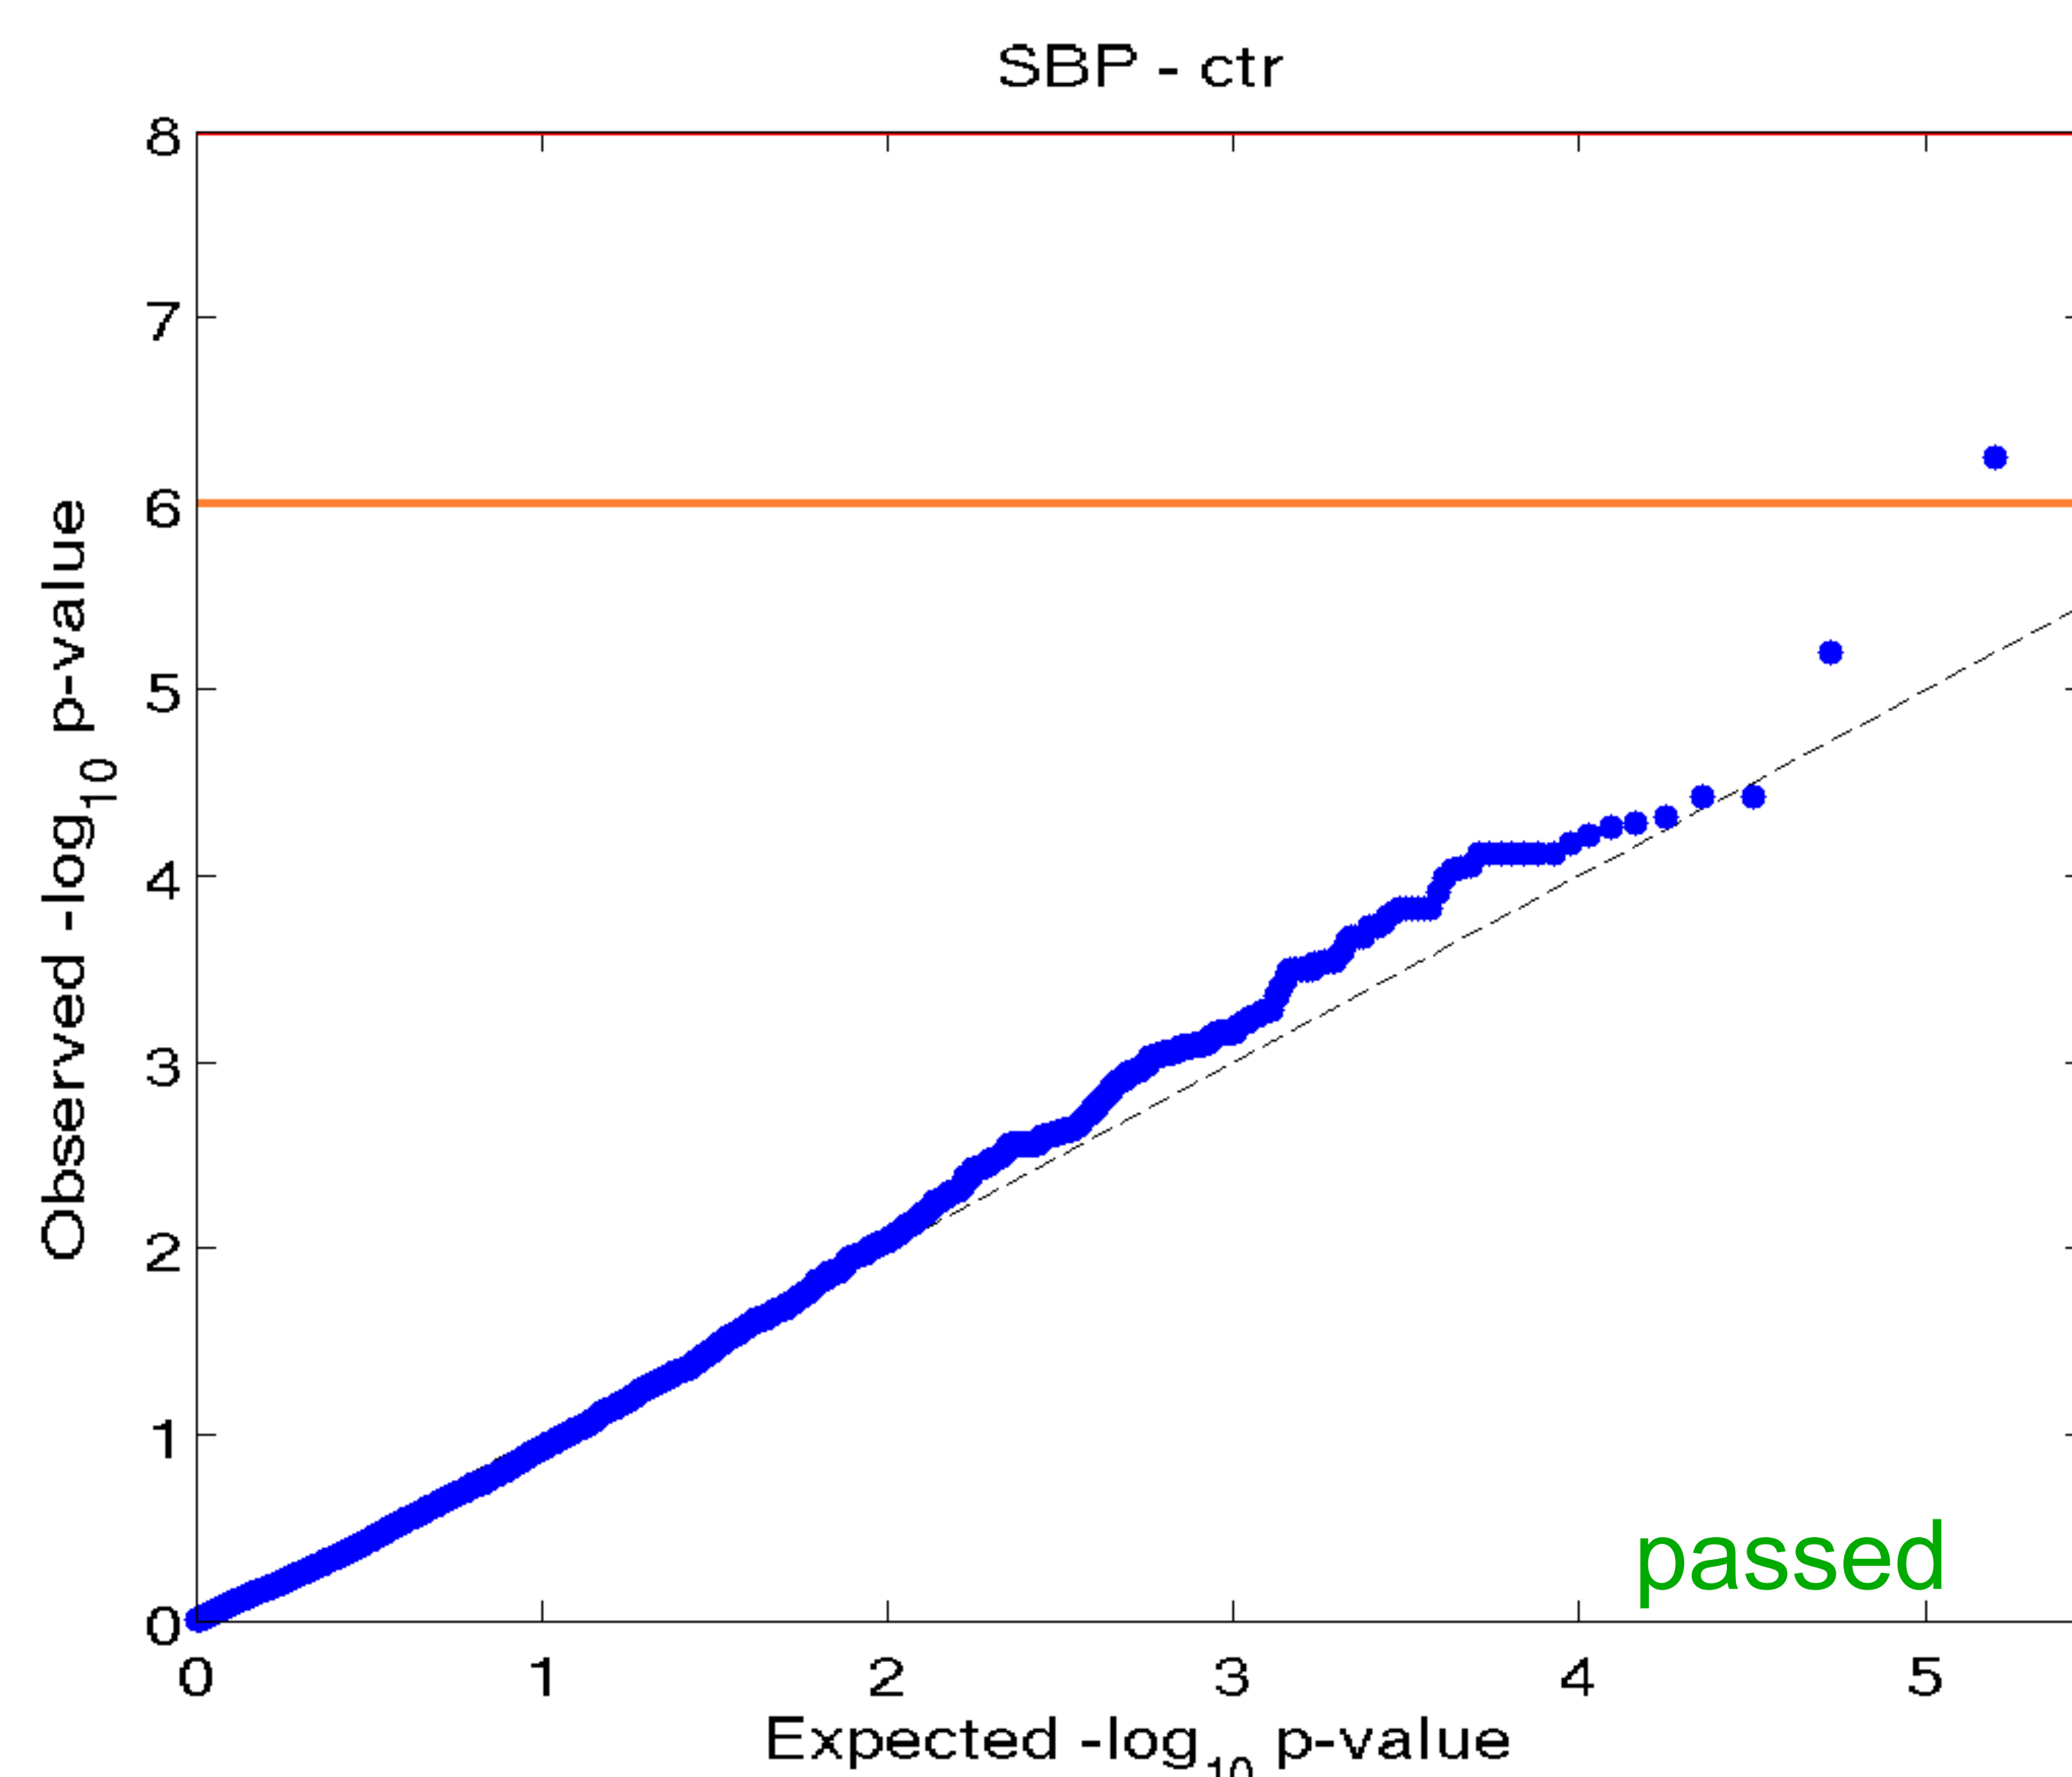

ST - ctr

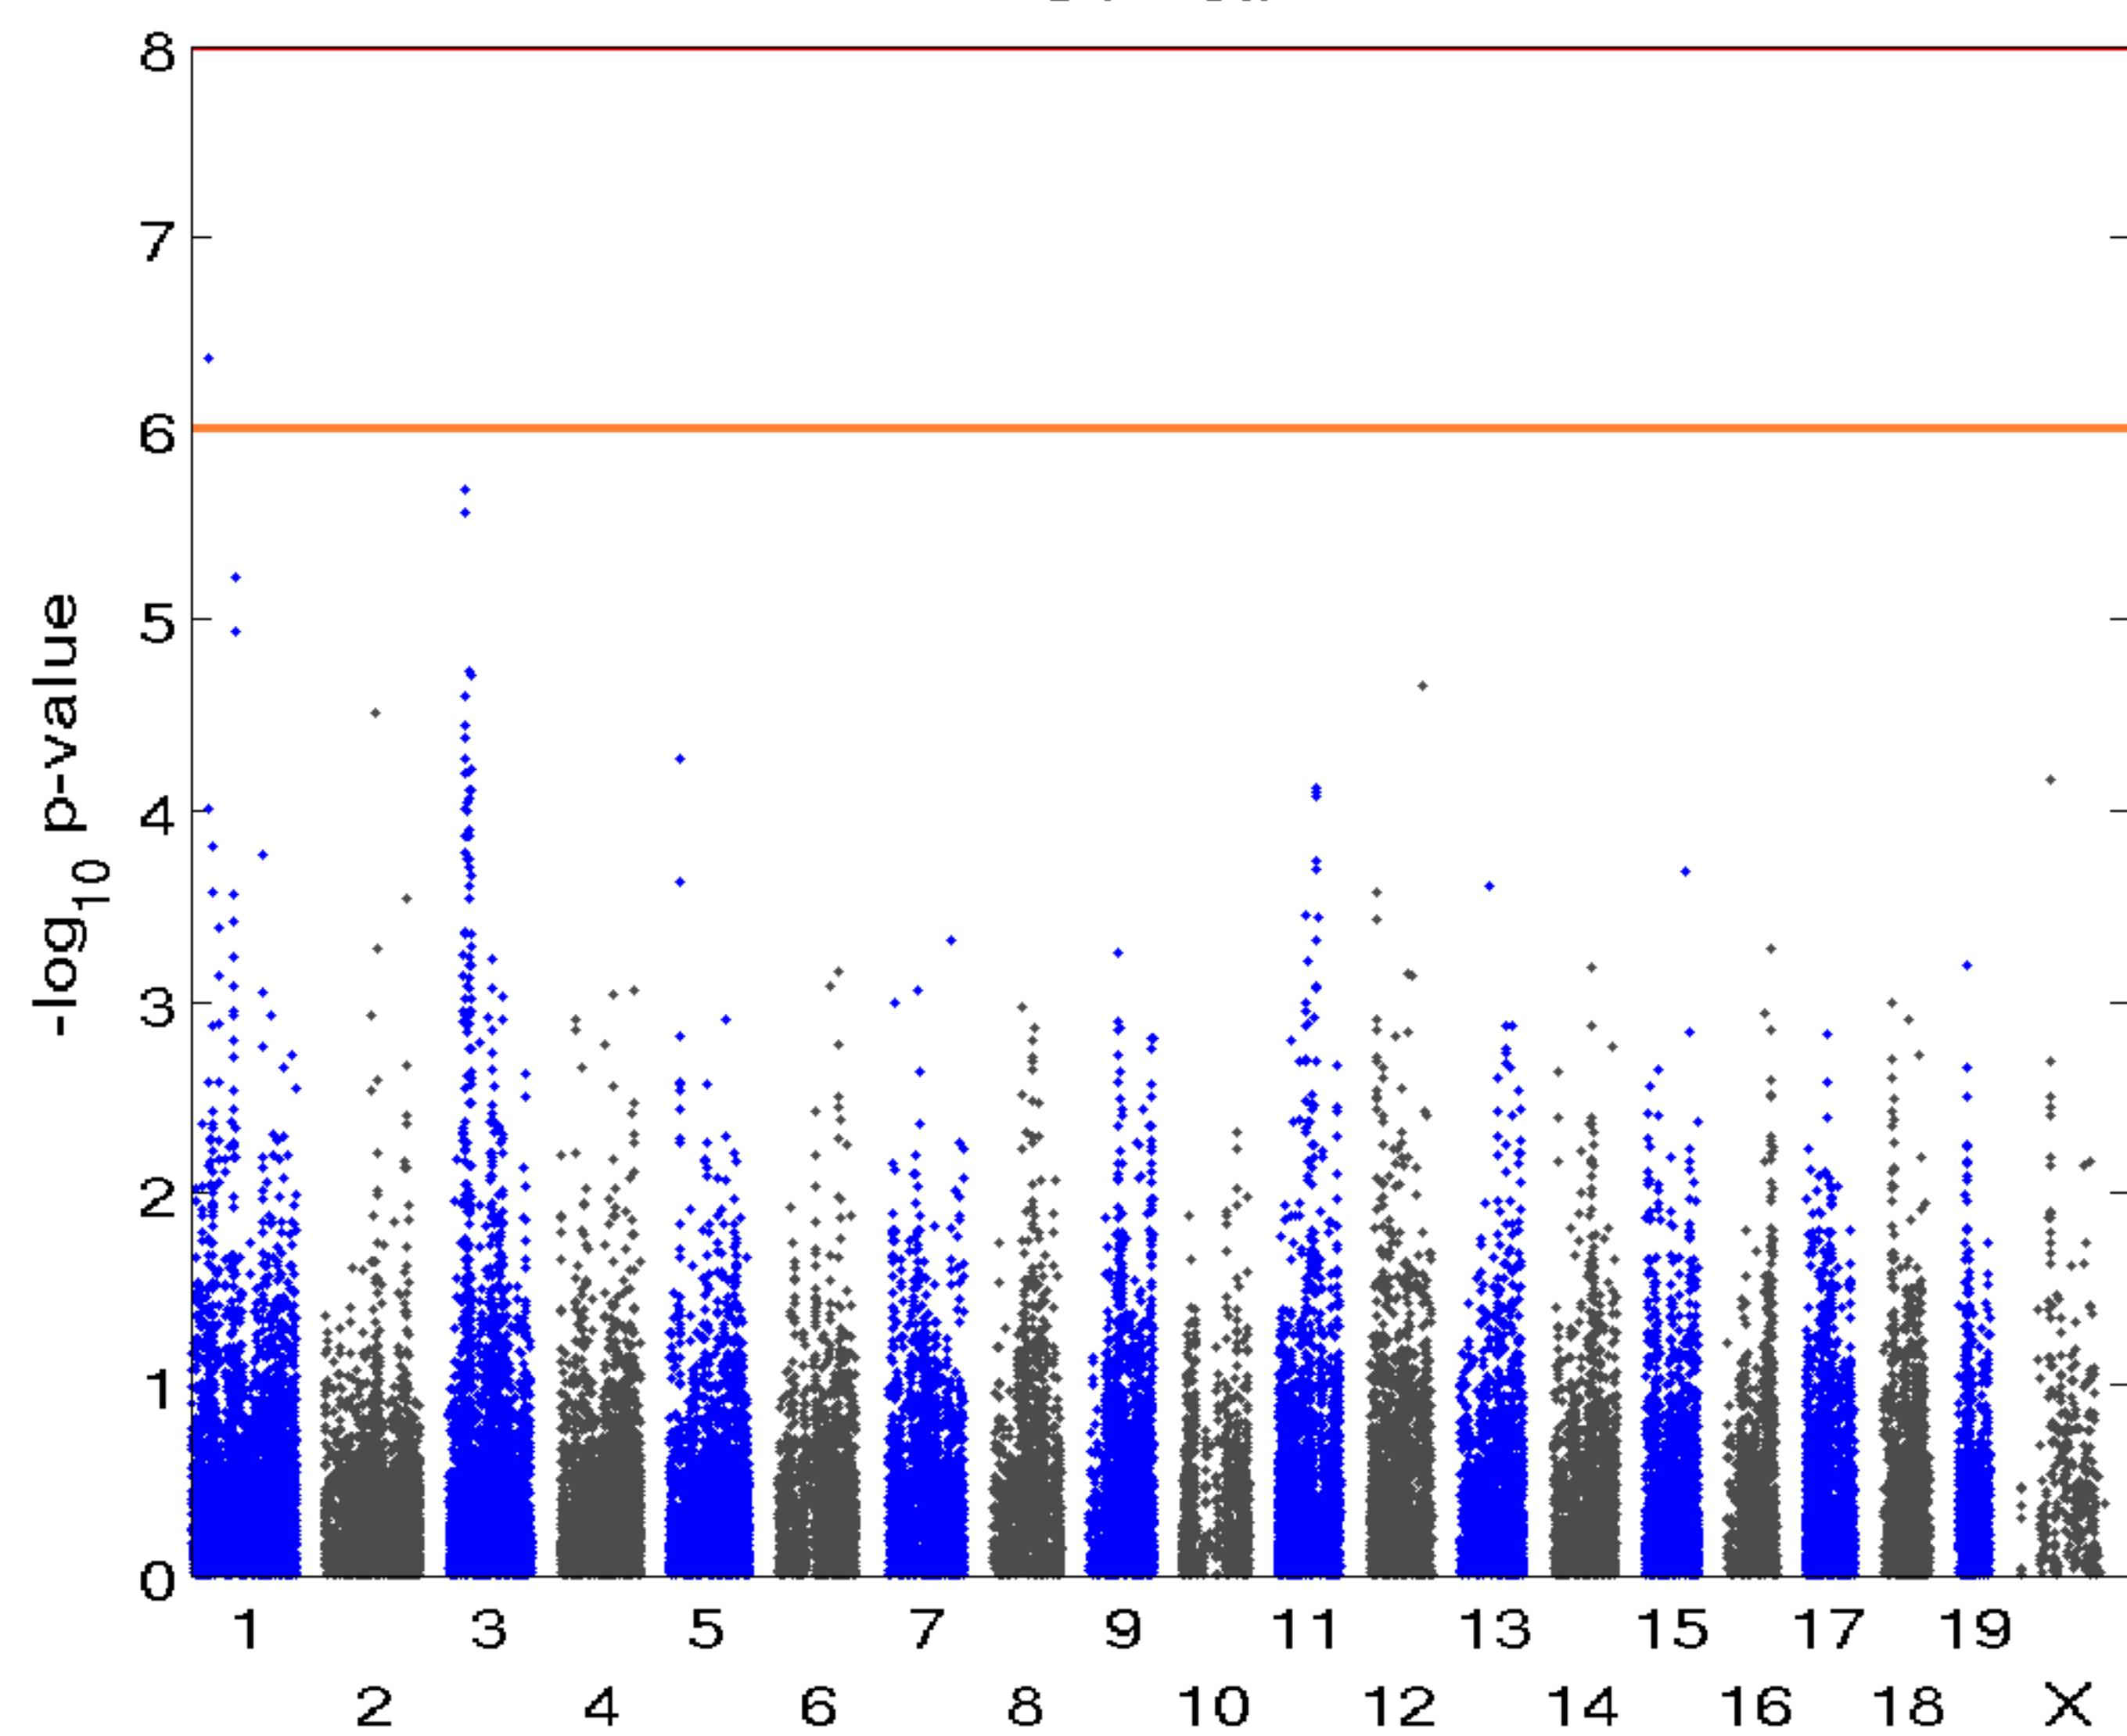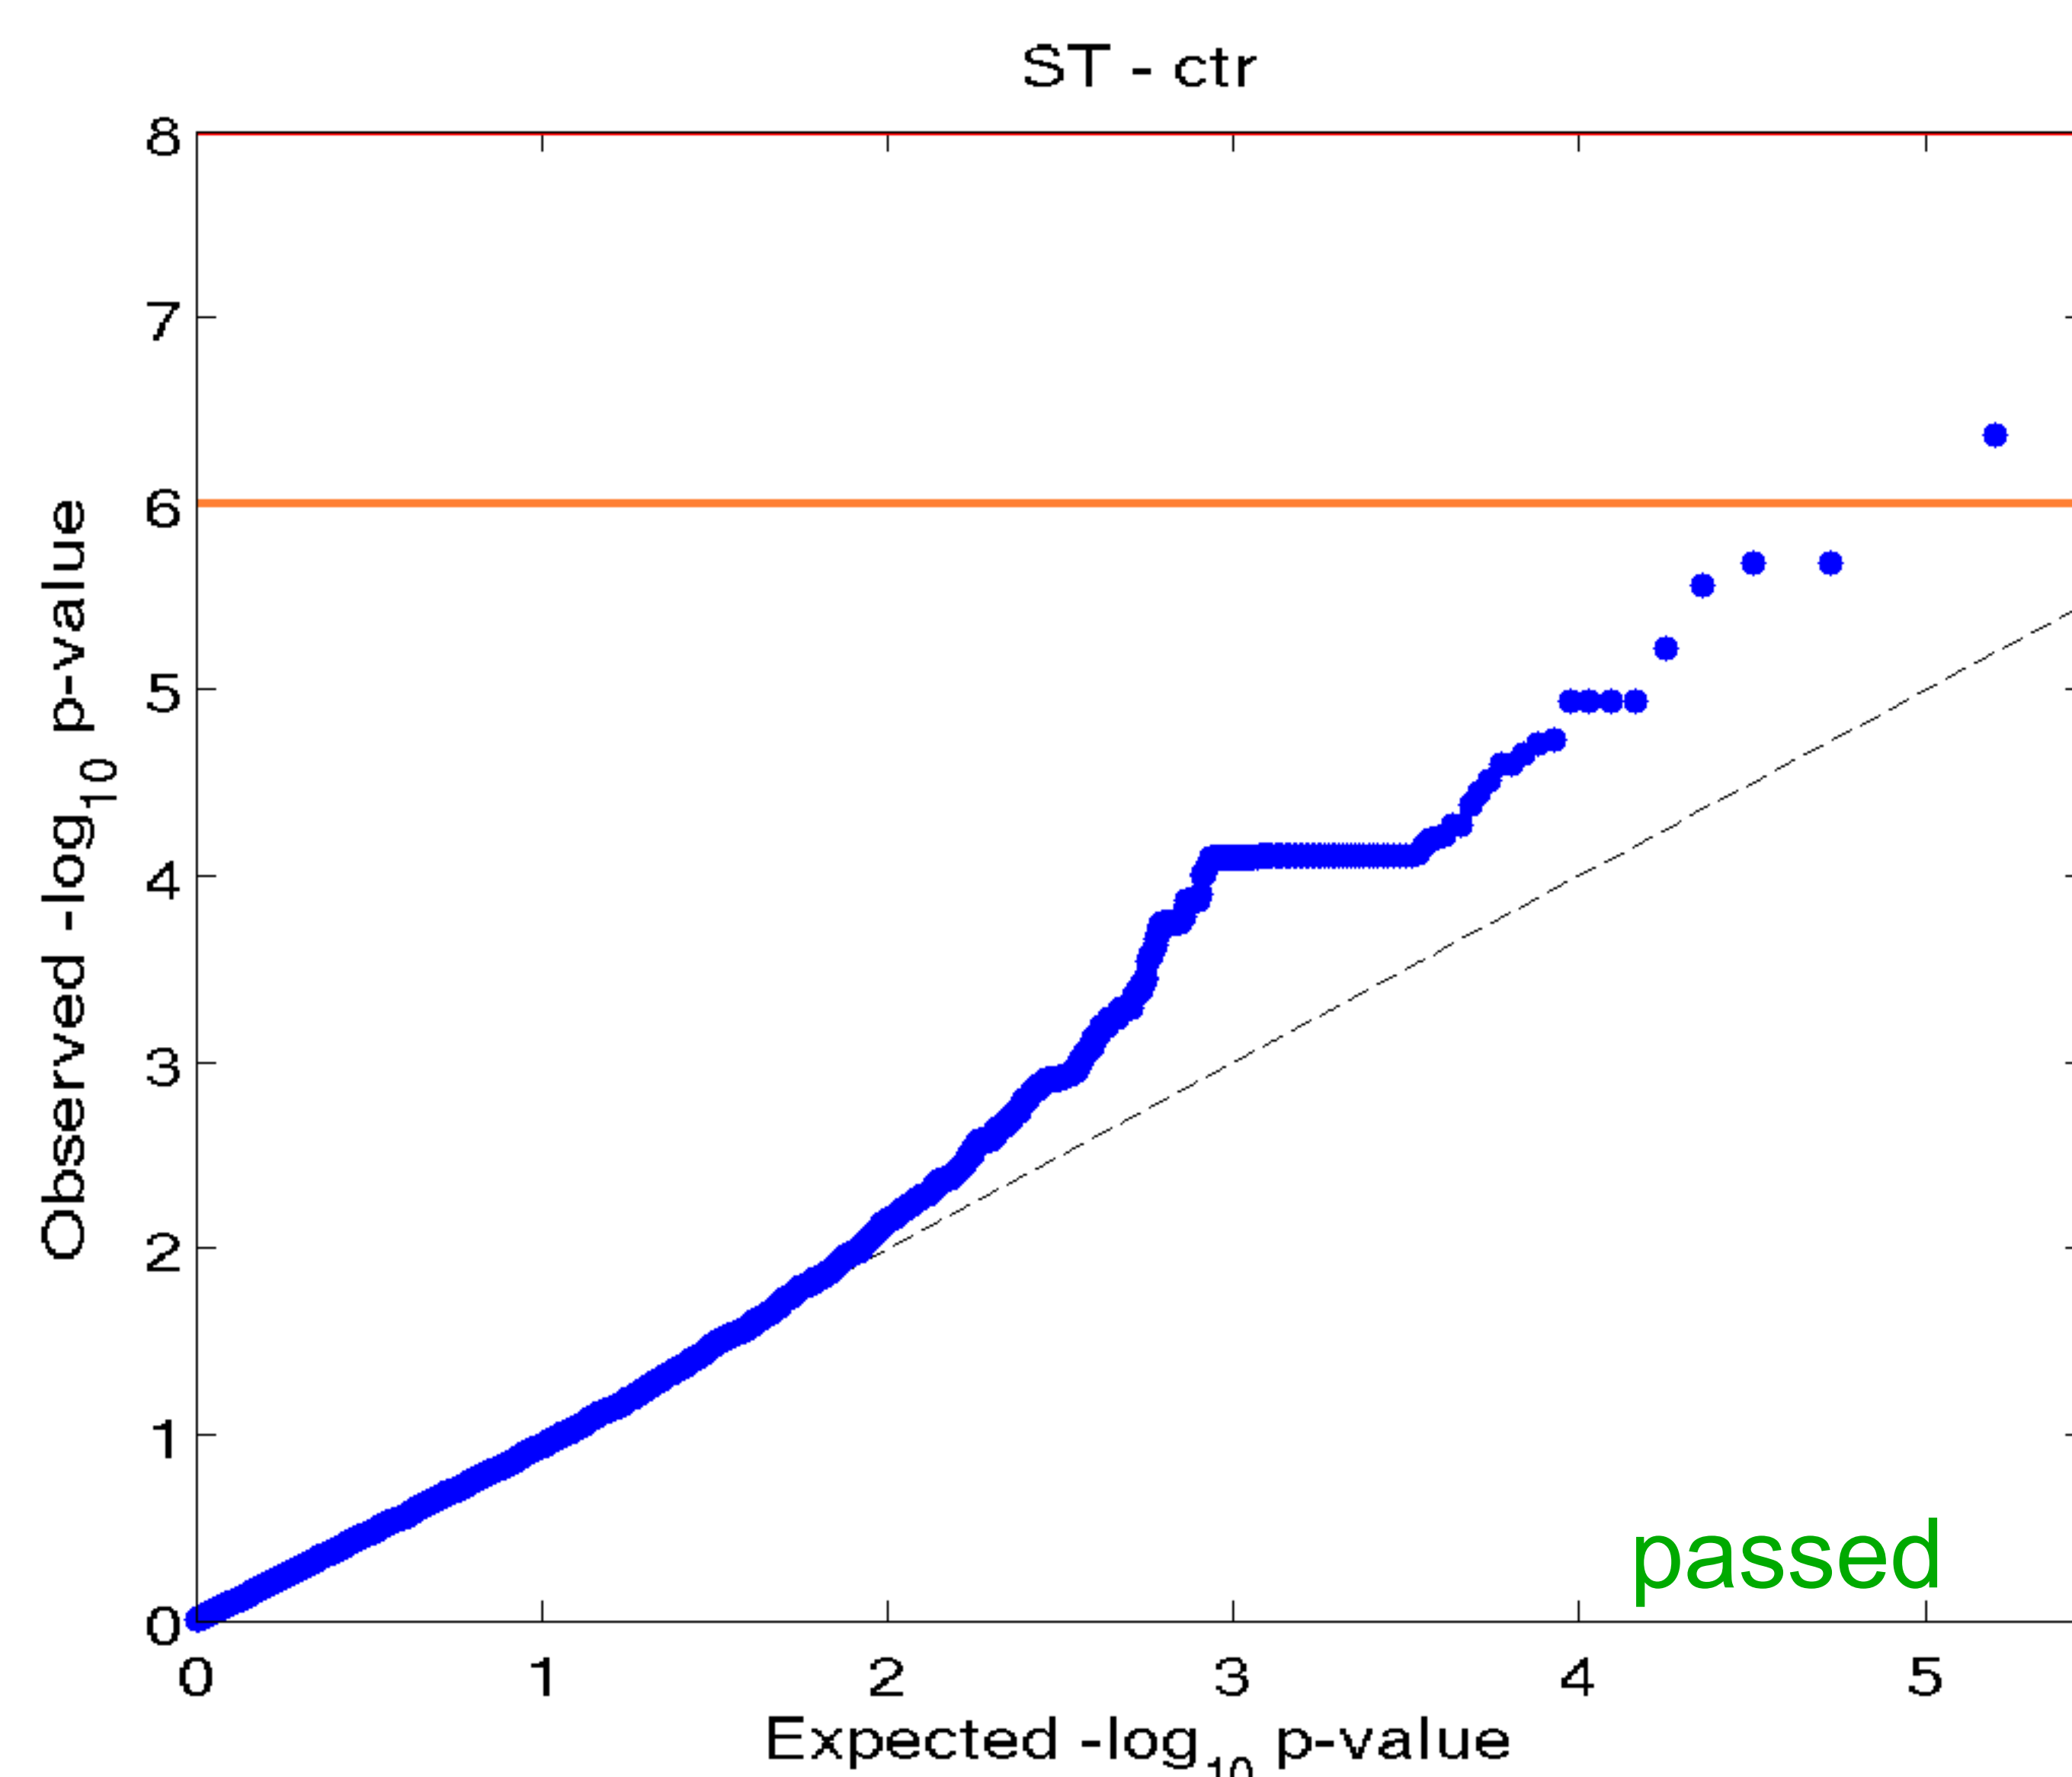

VW/AW - ctr

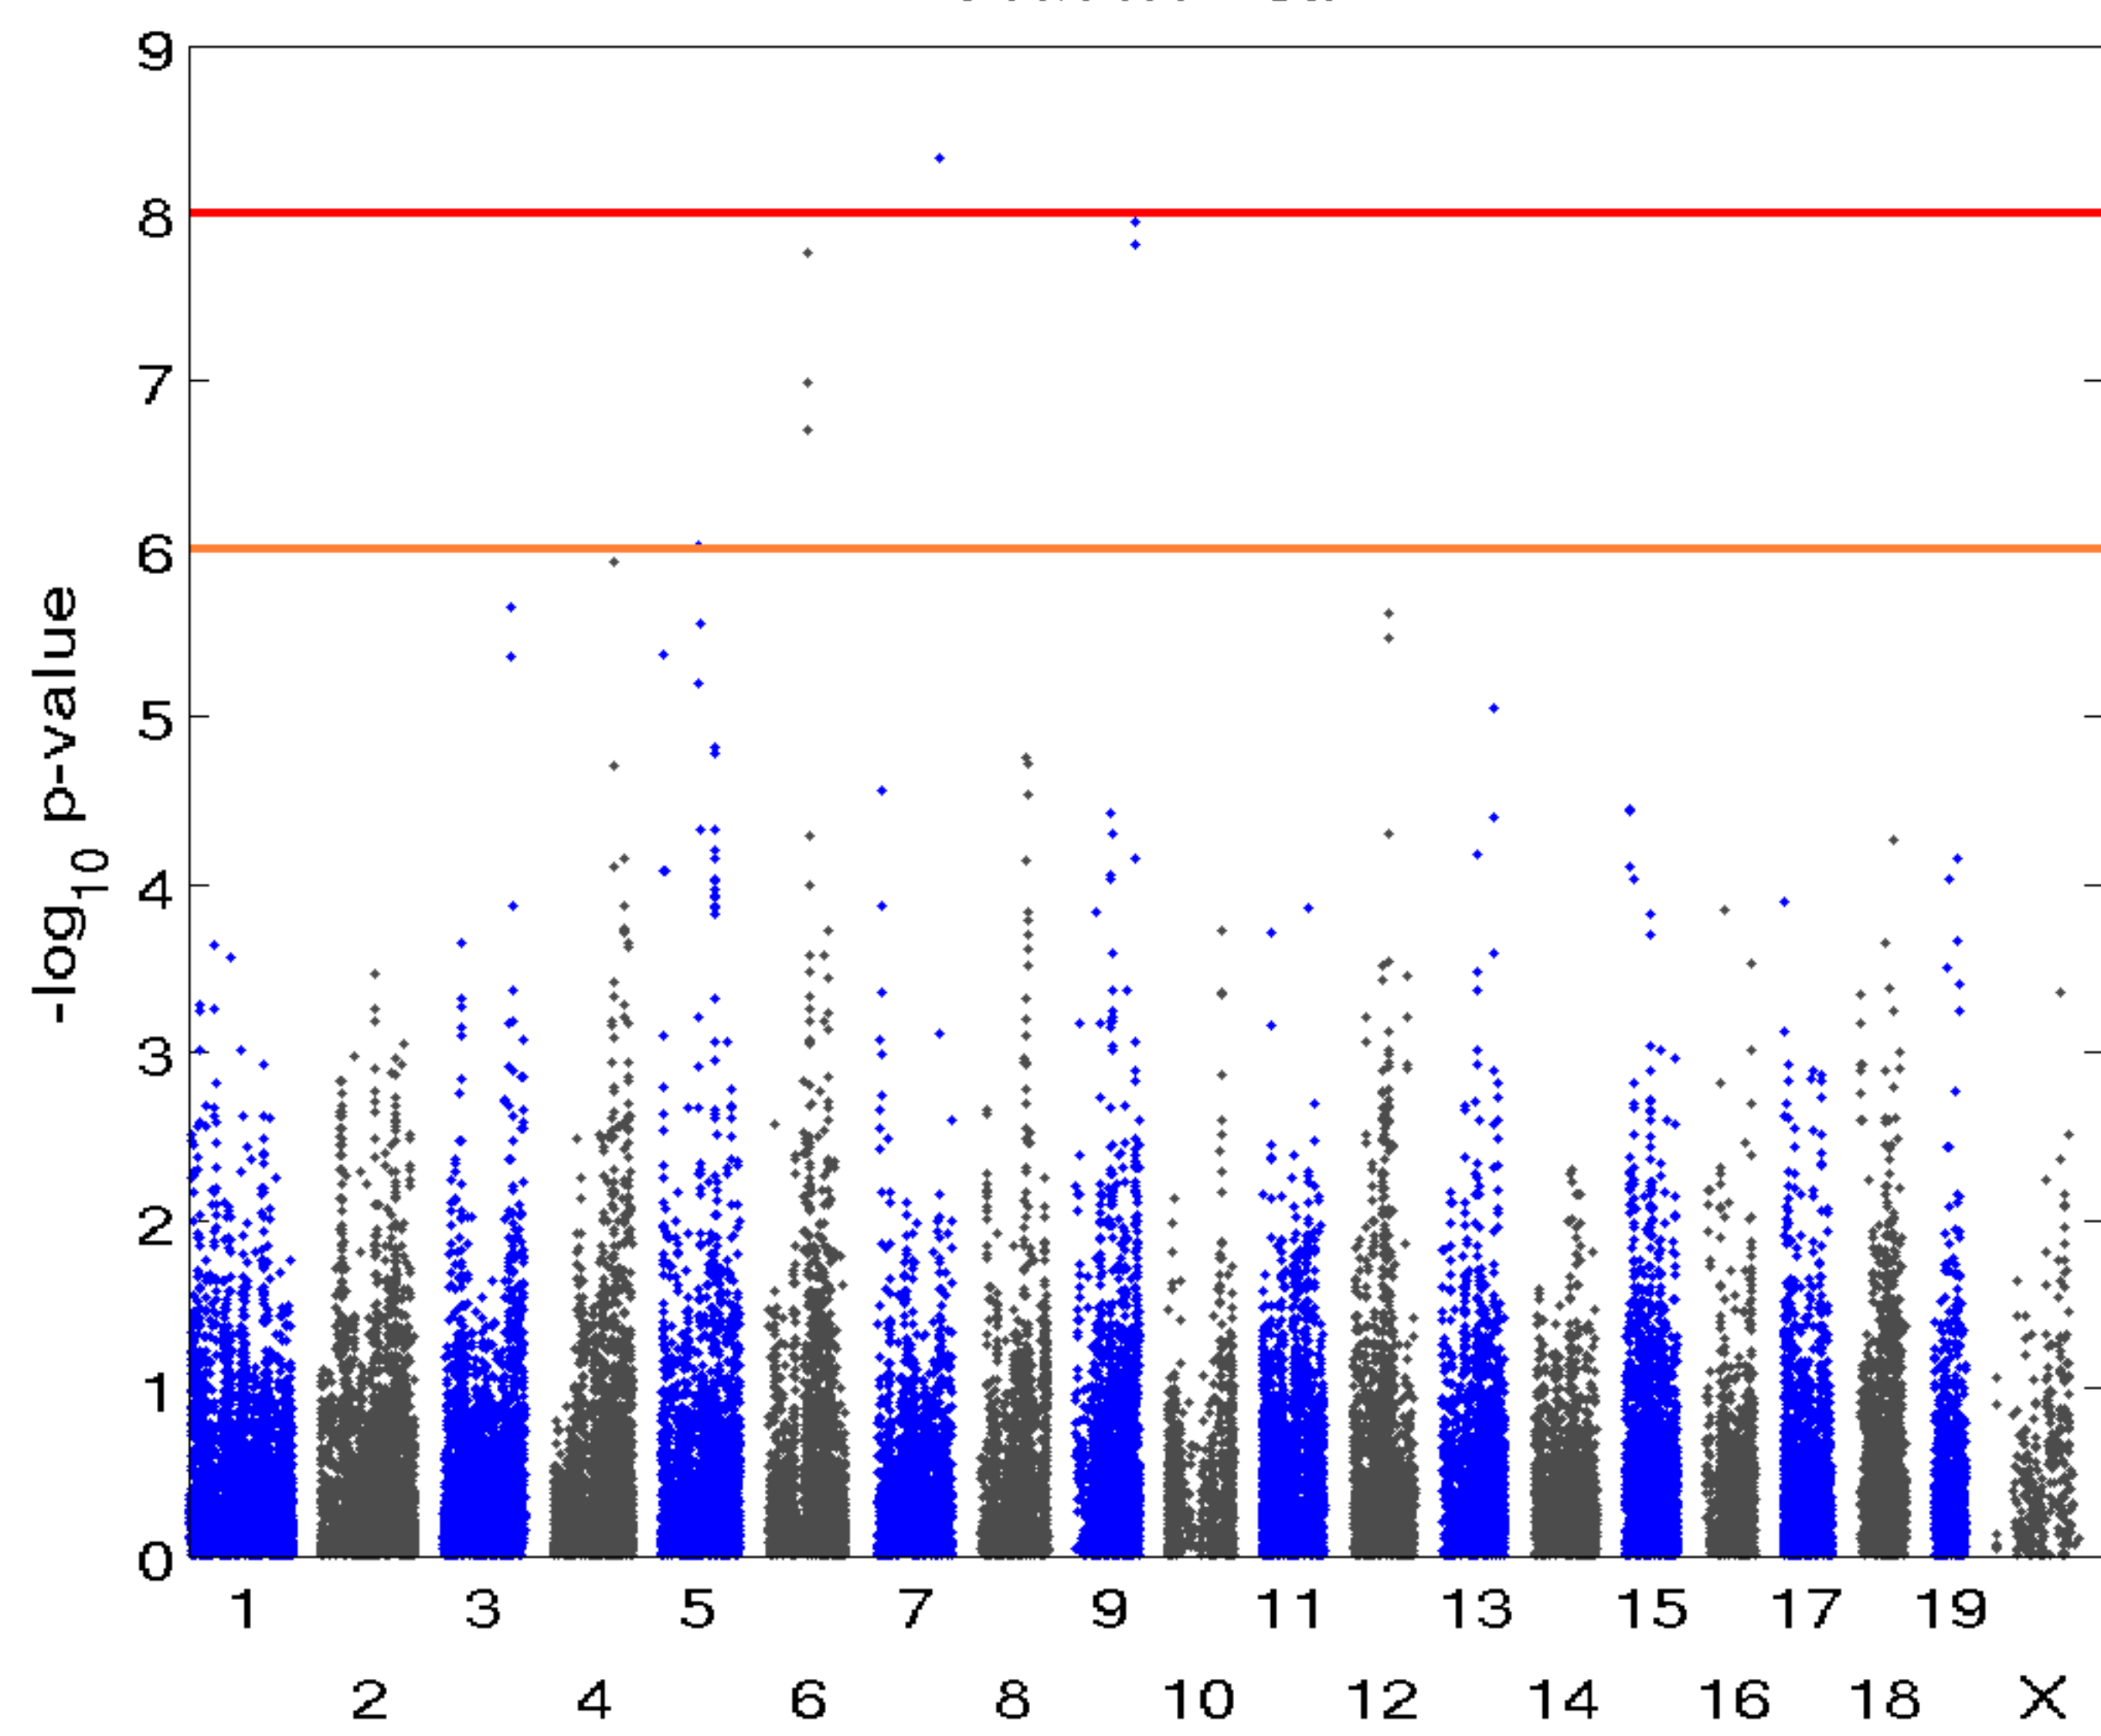

VW/AW - ctr

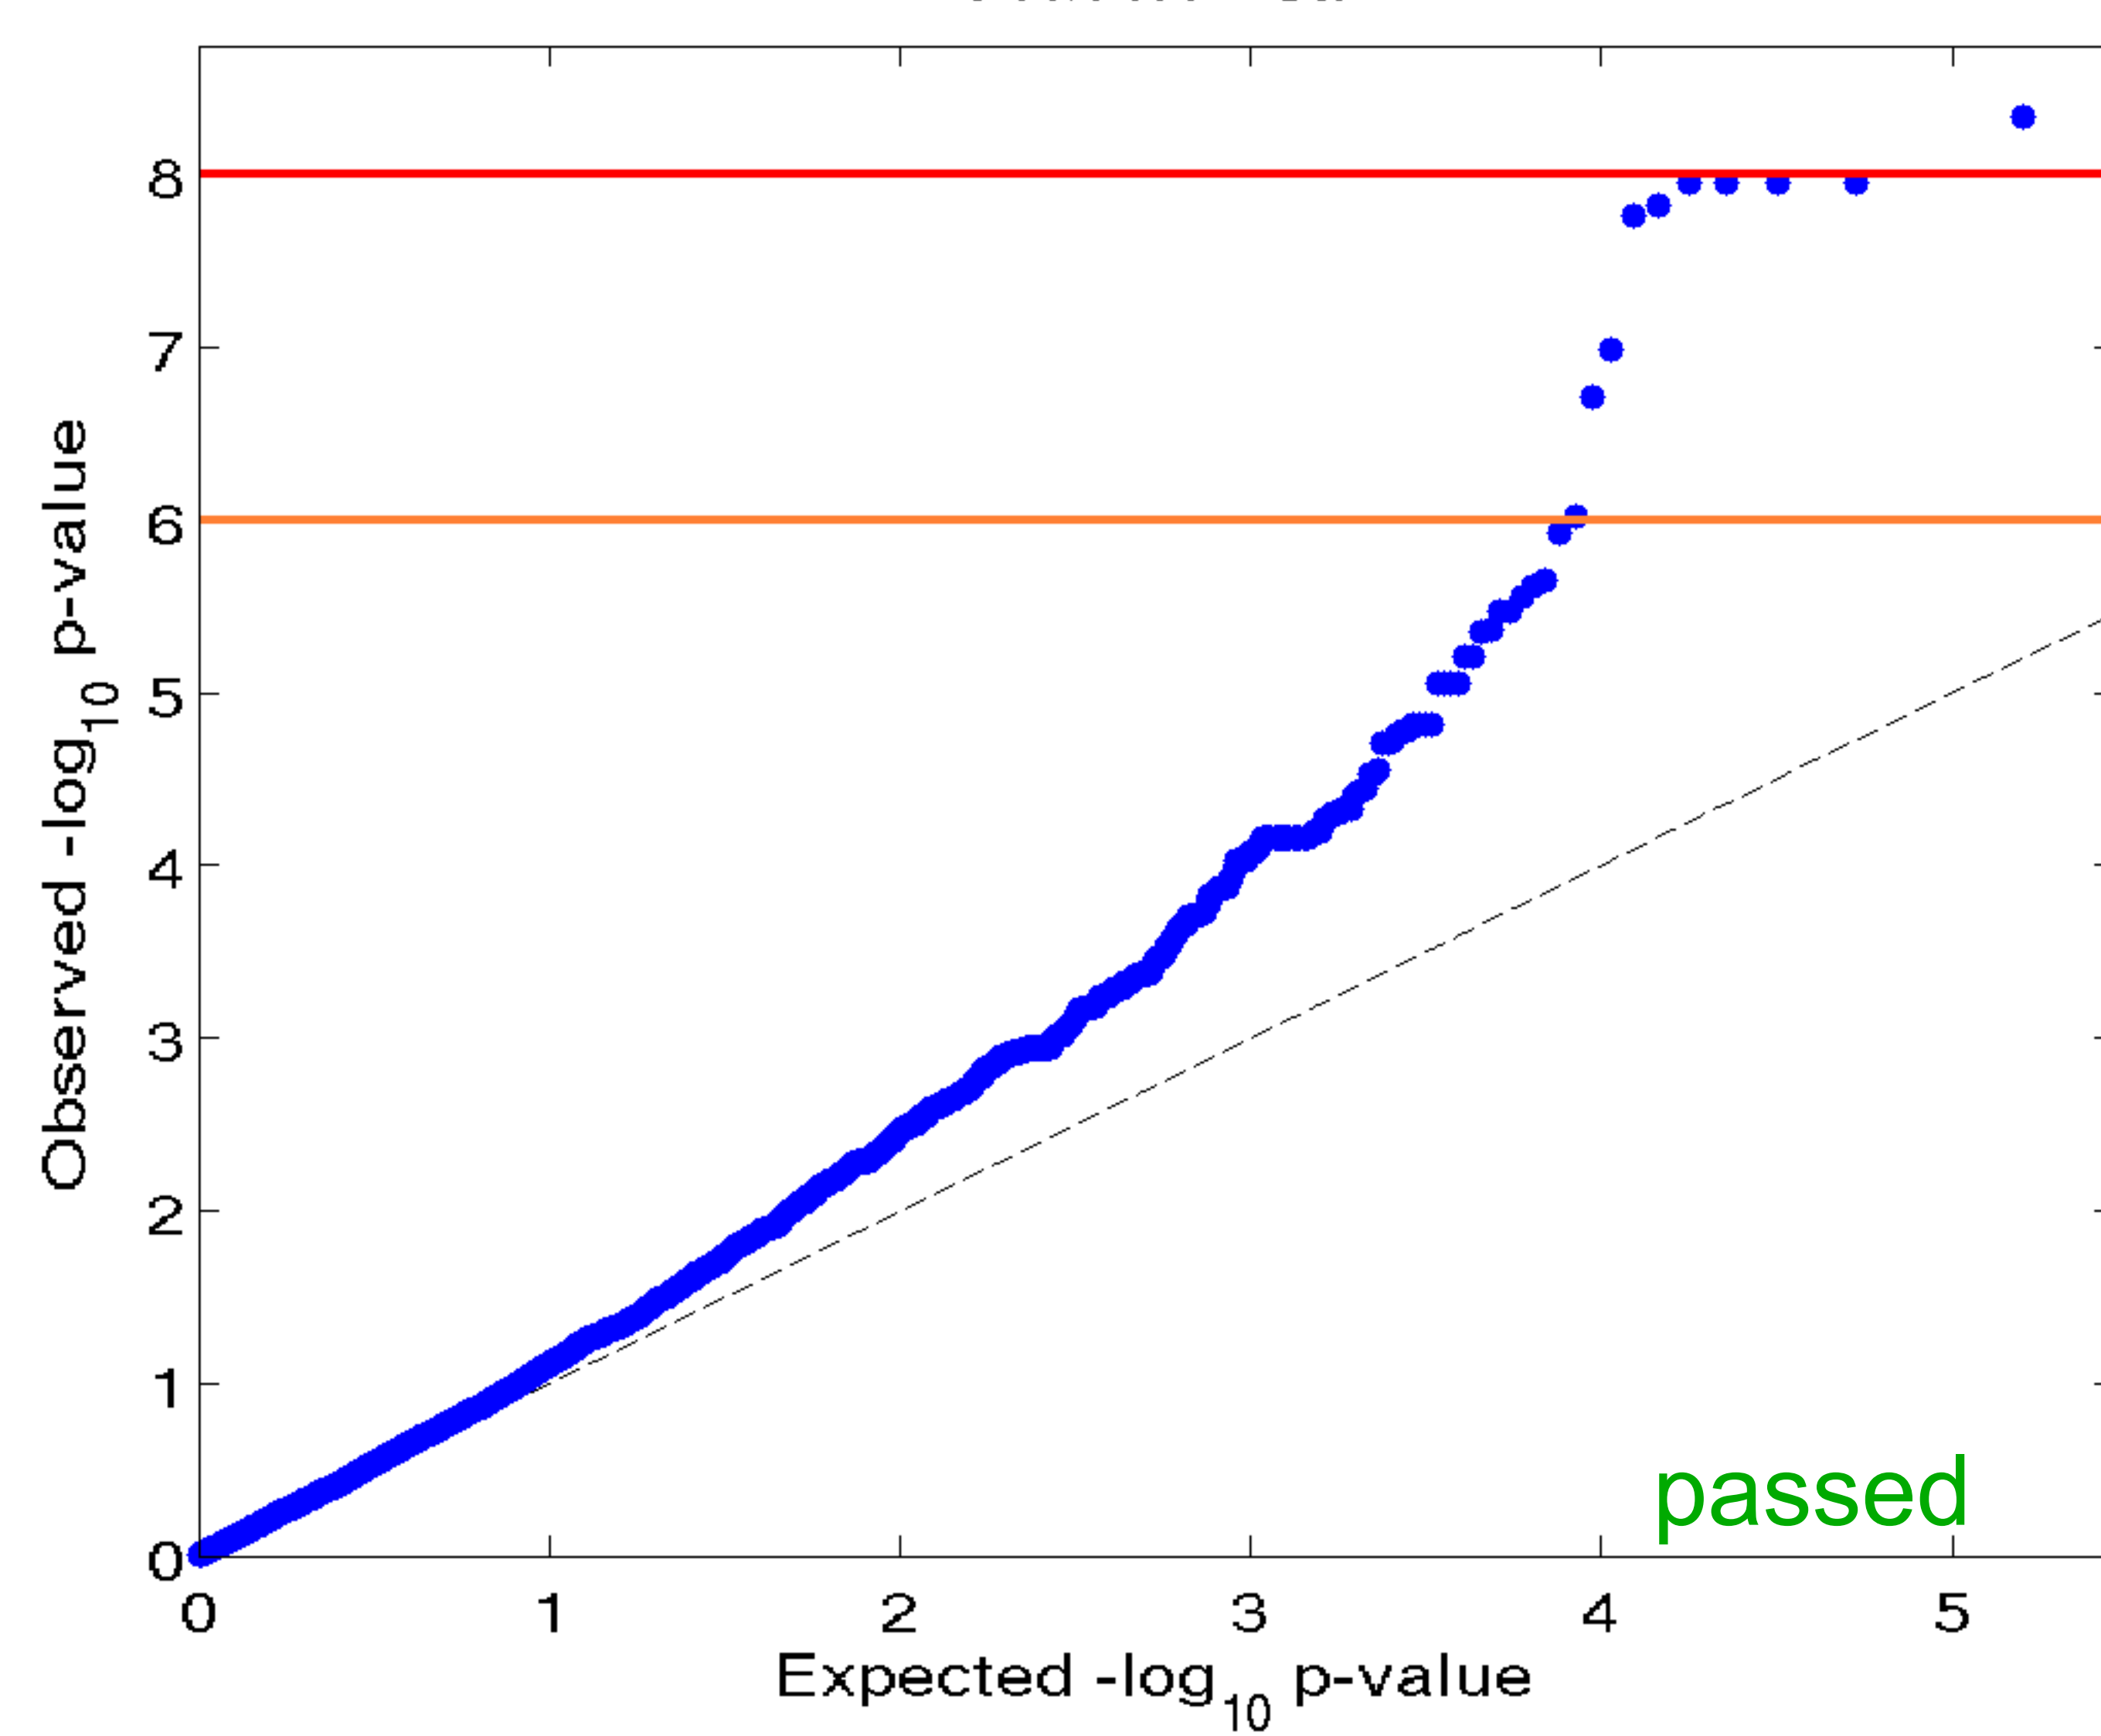



VW/BWS - ctr

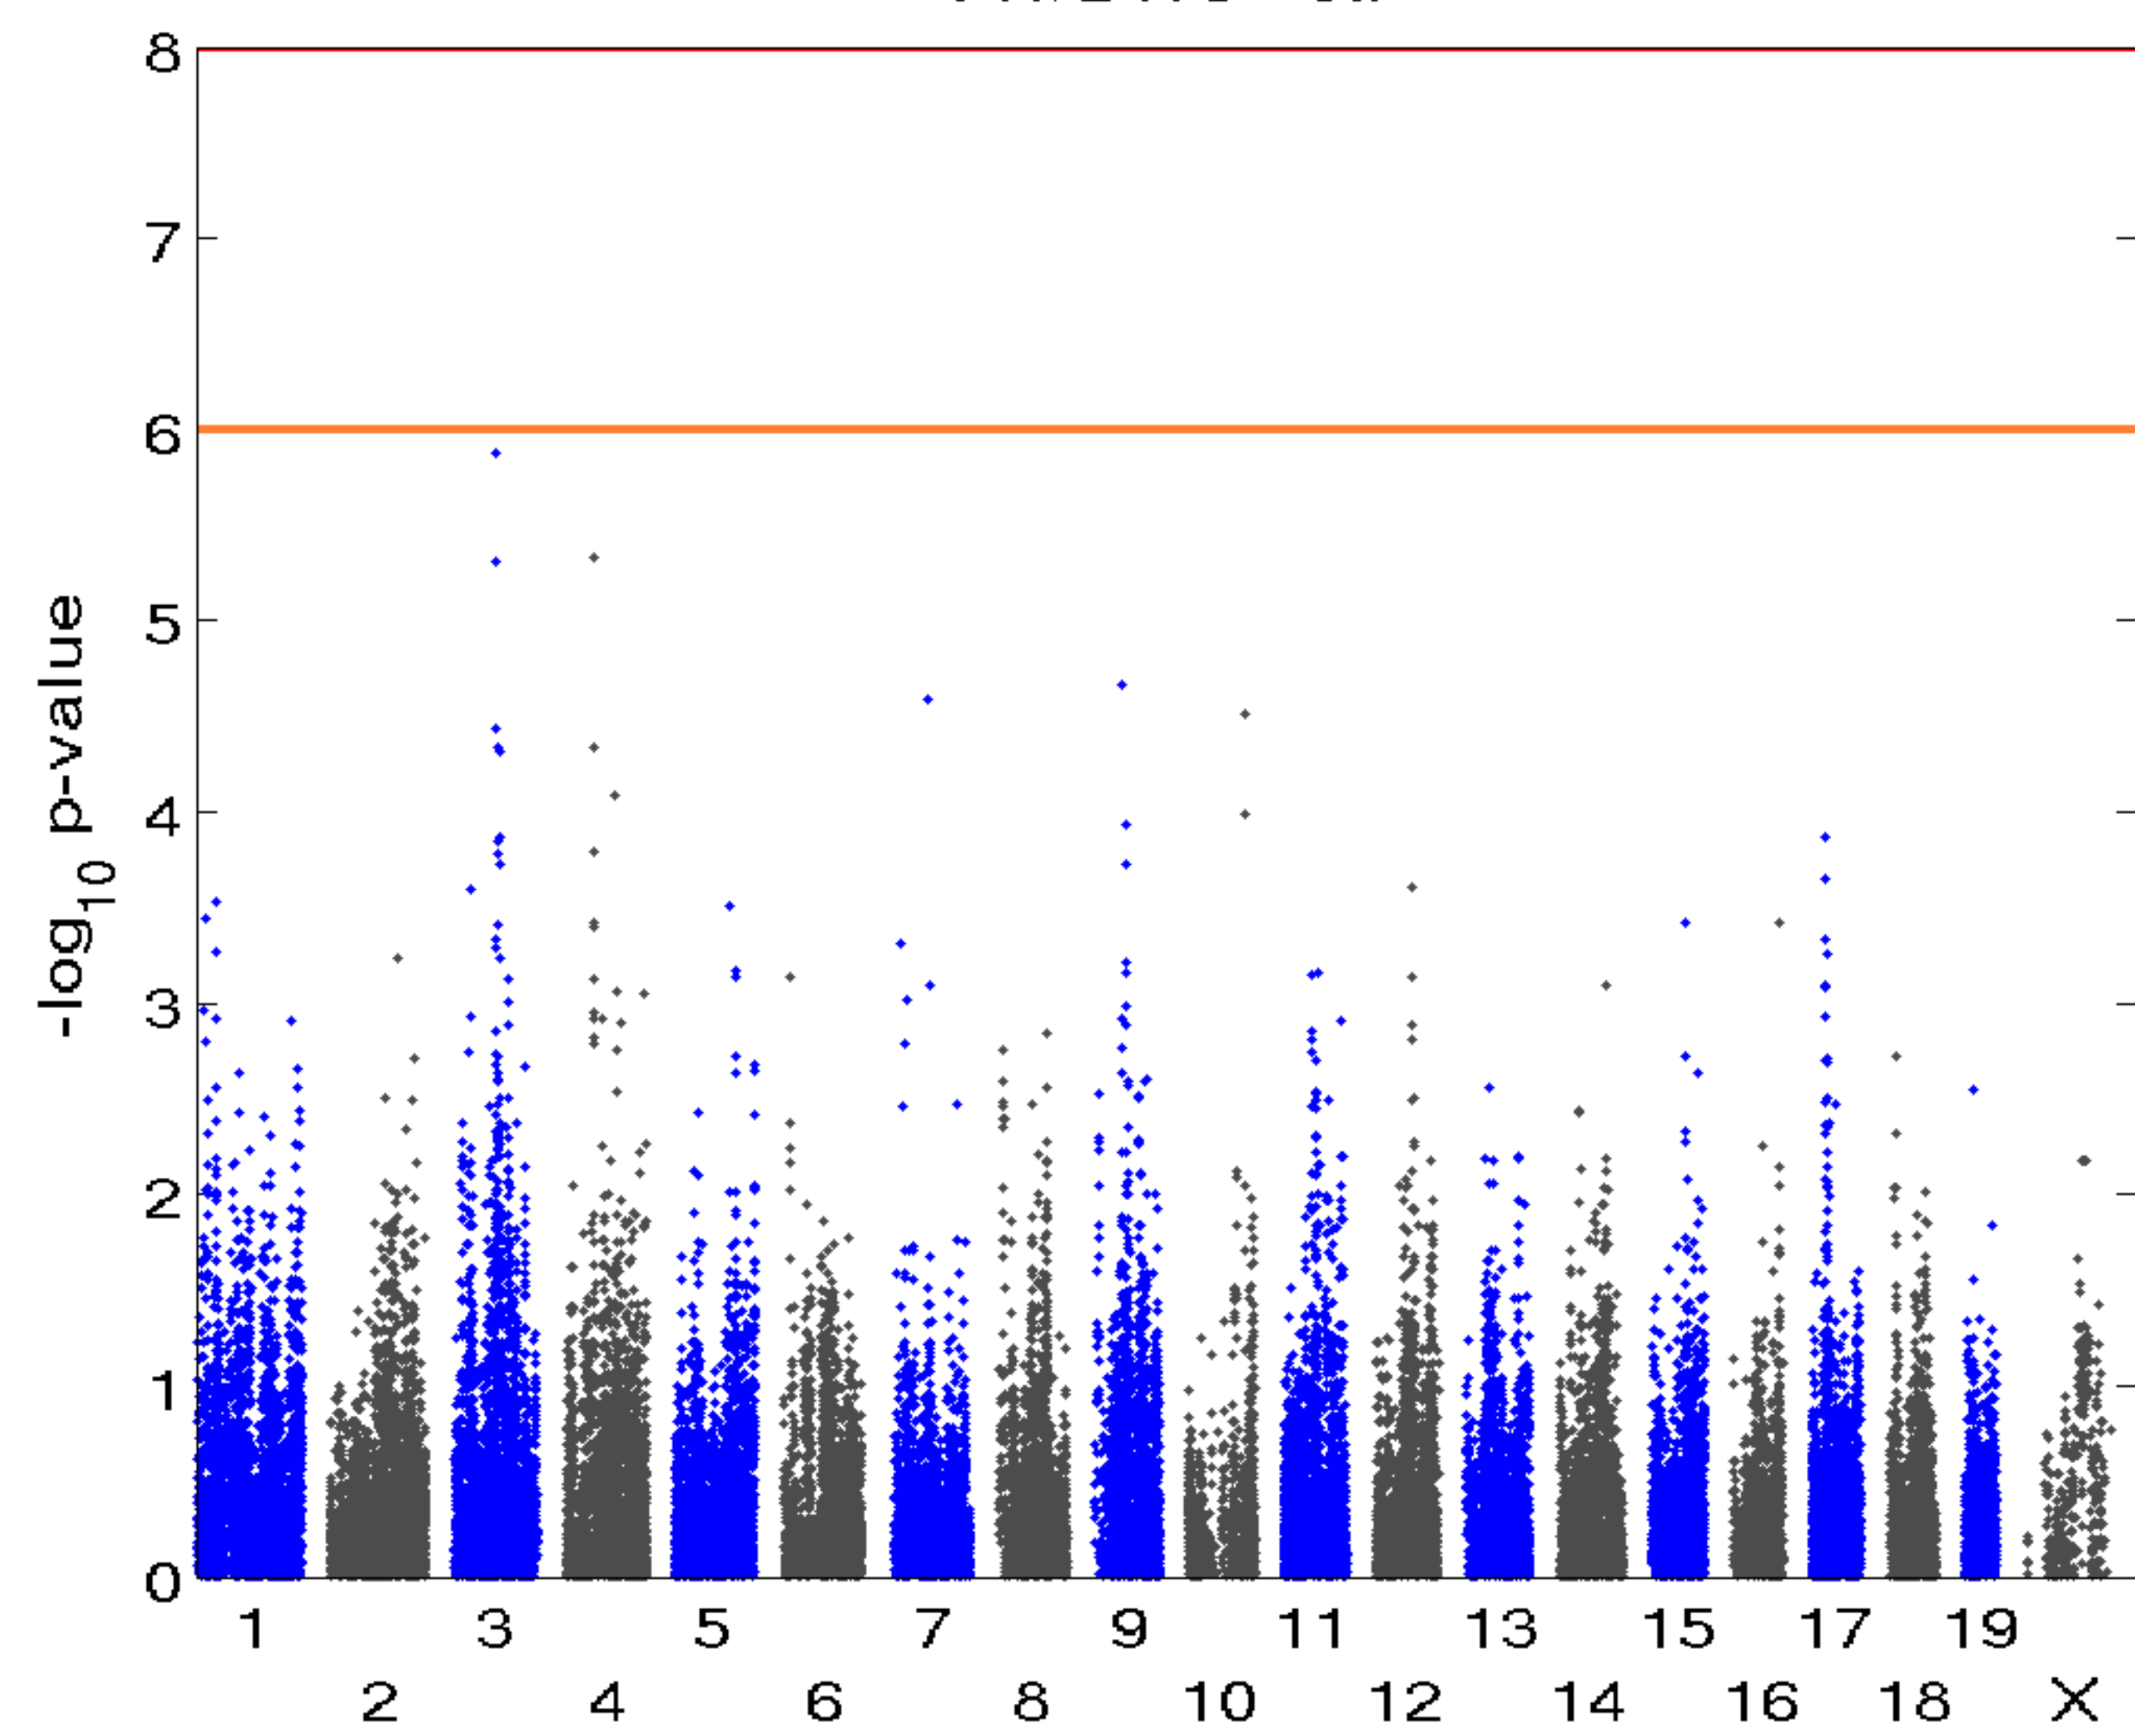

VW/BWS - ctr

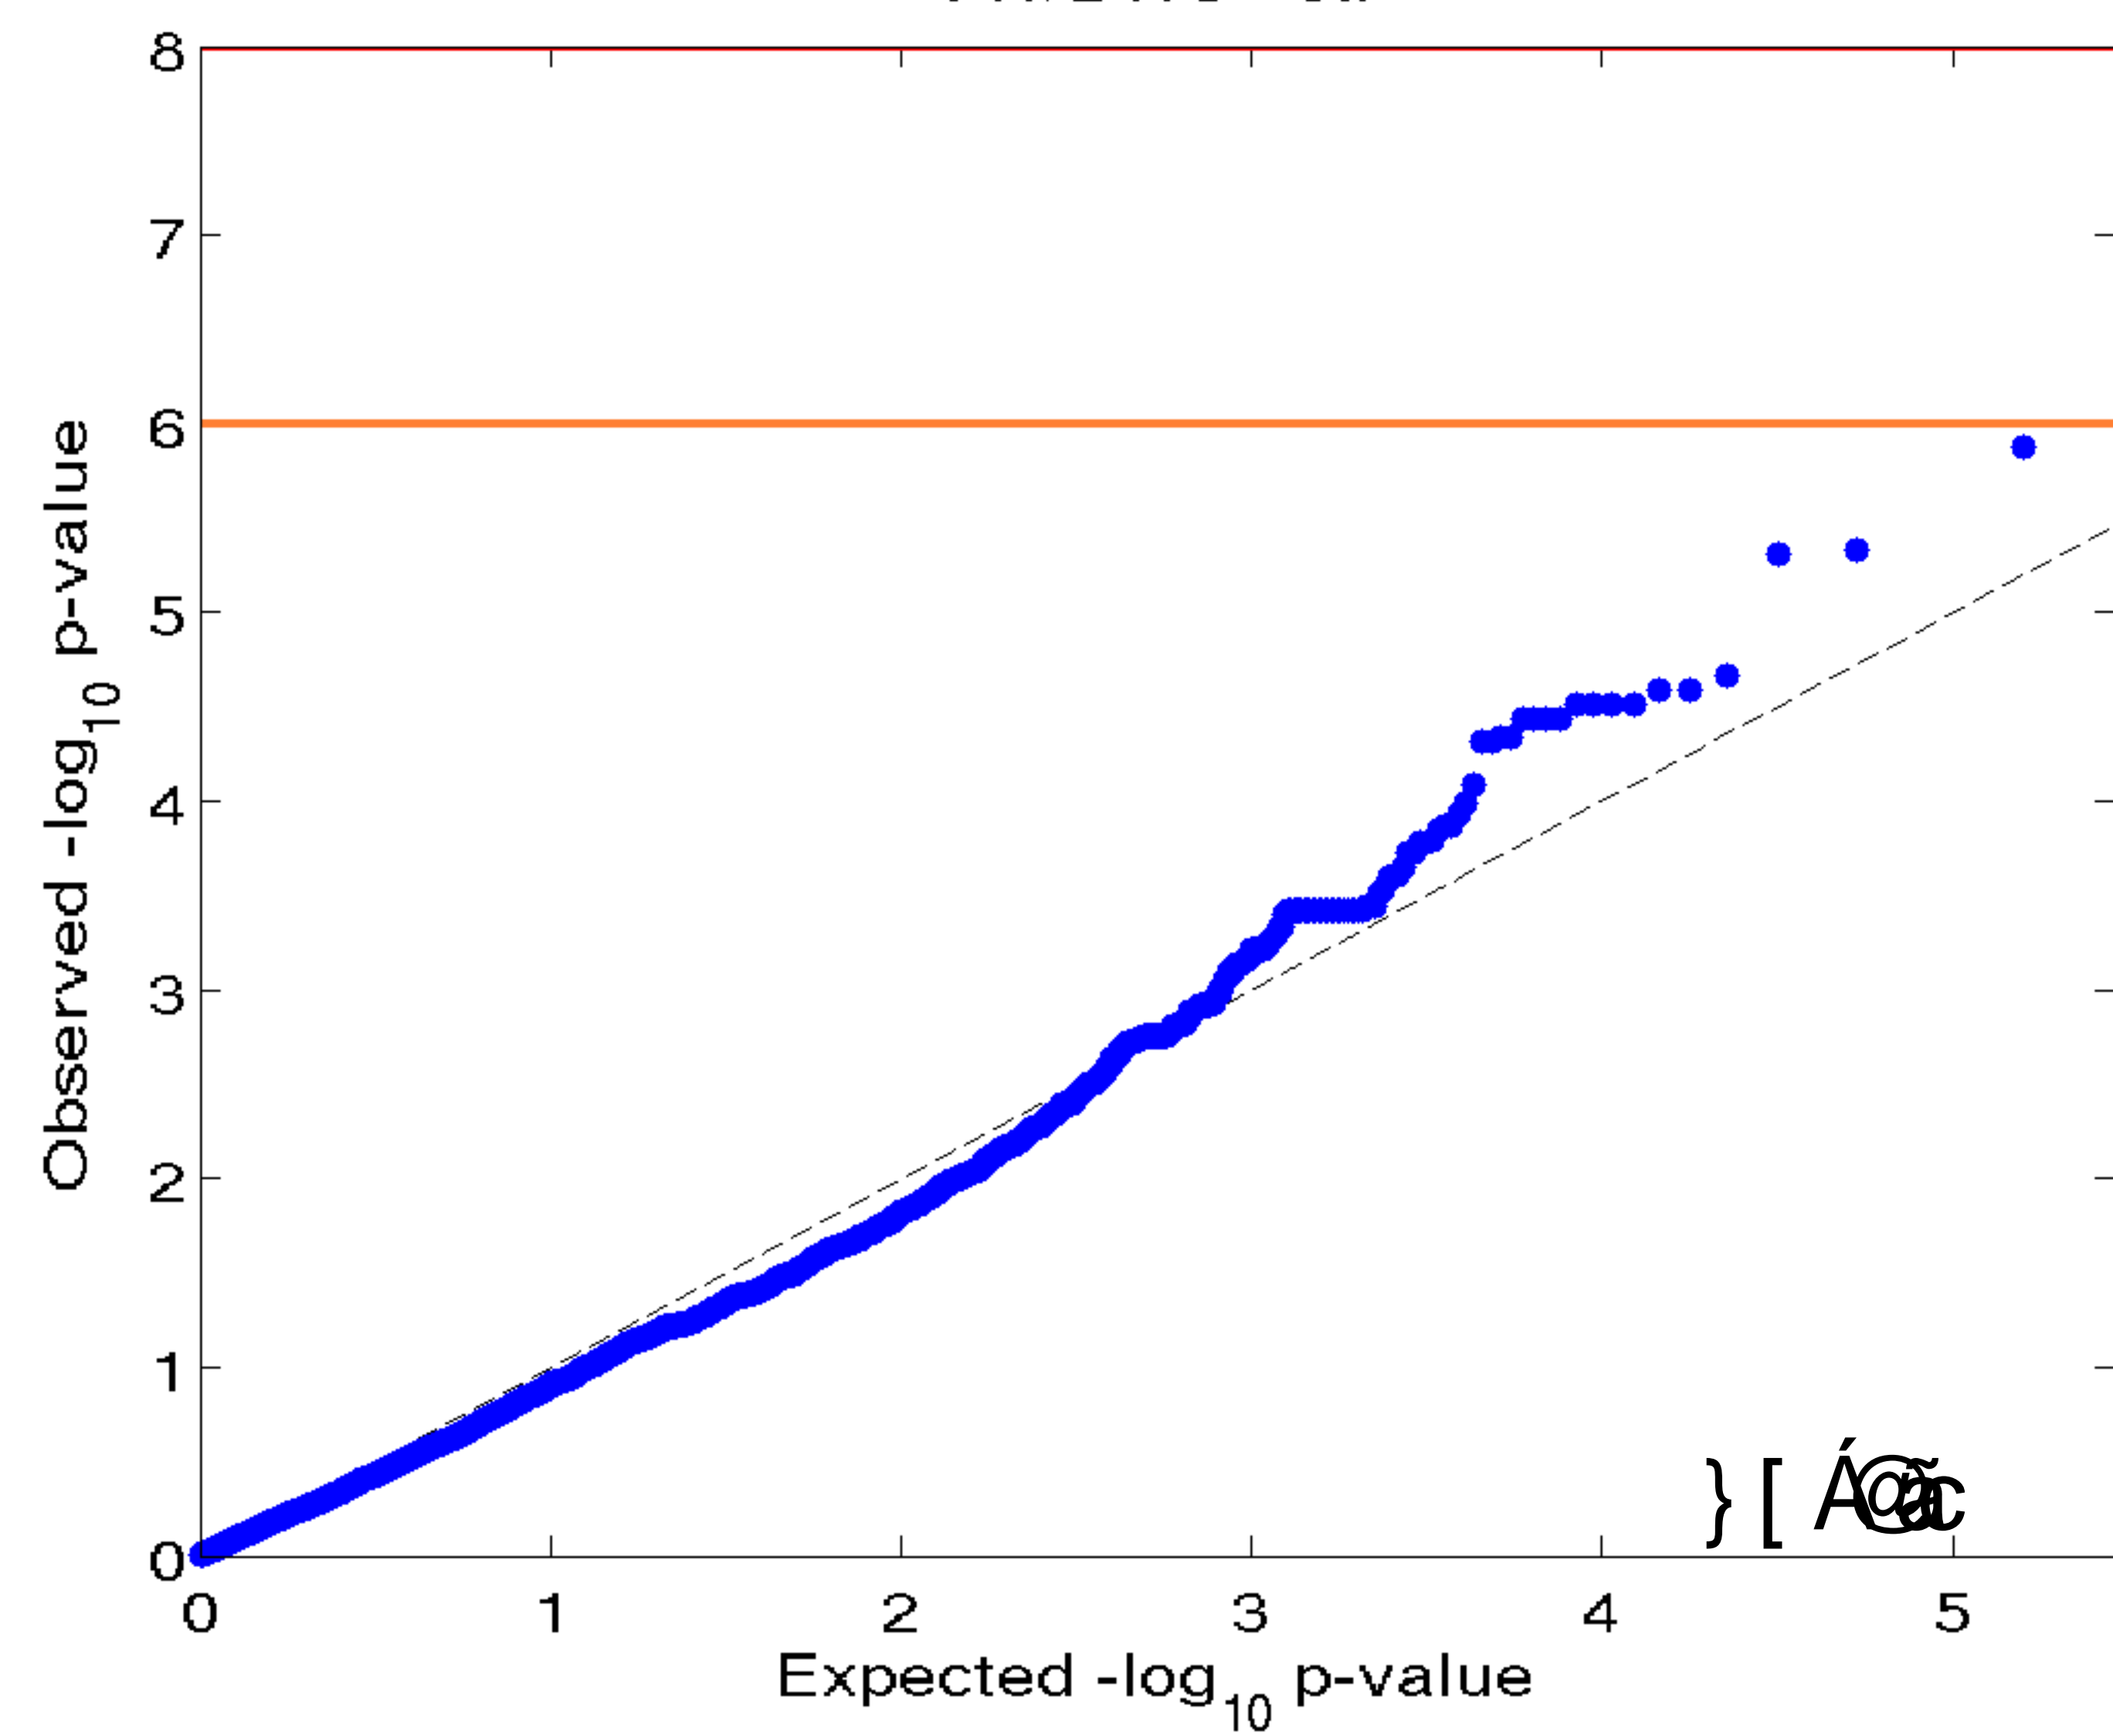

VWI - ctr

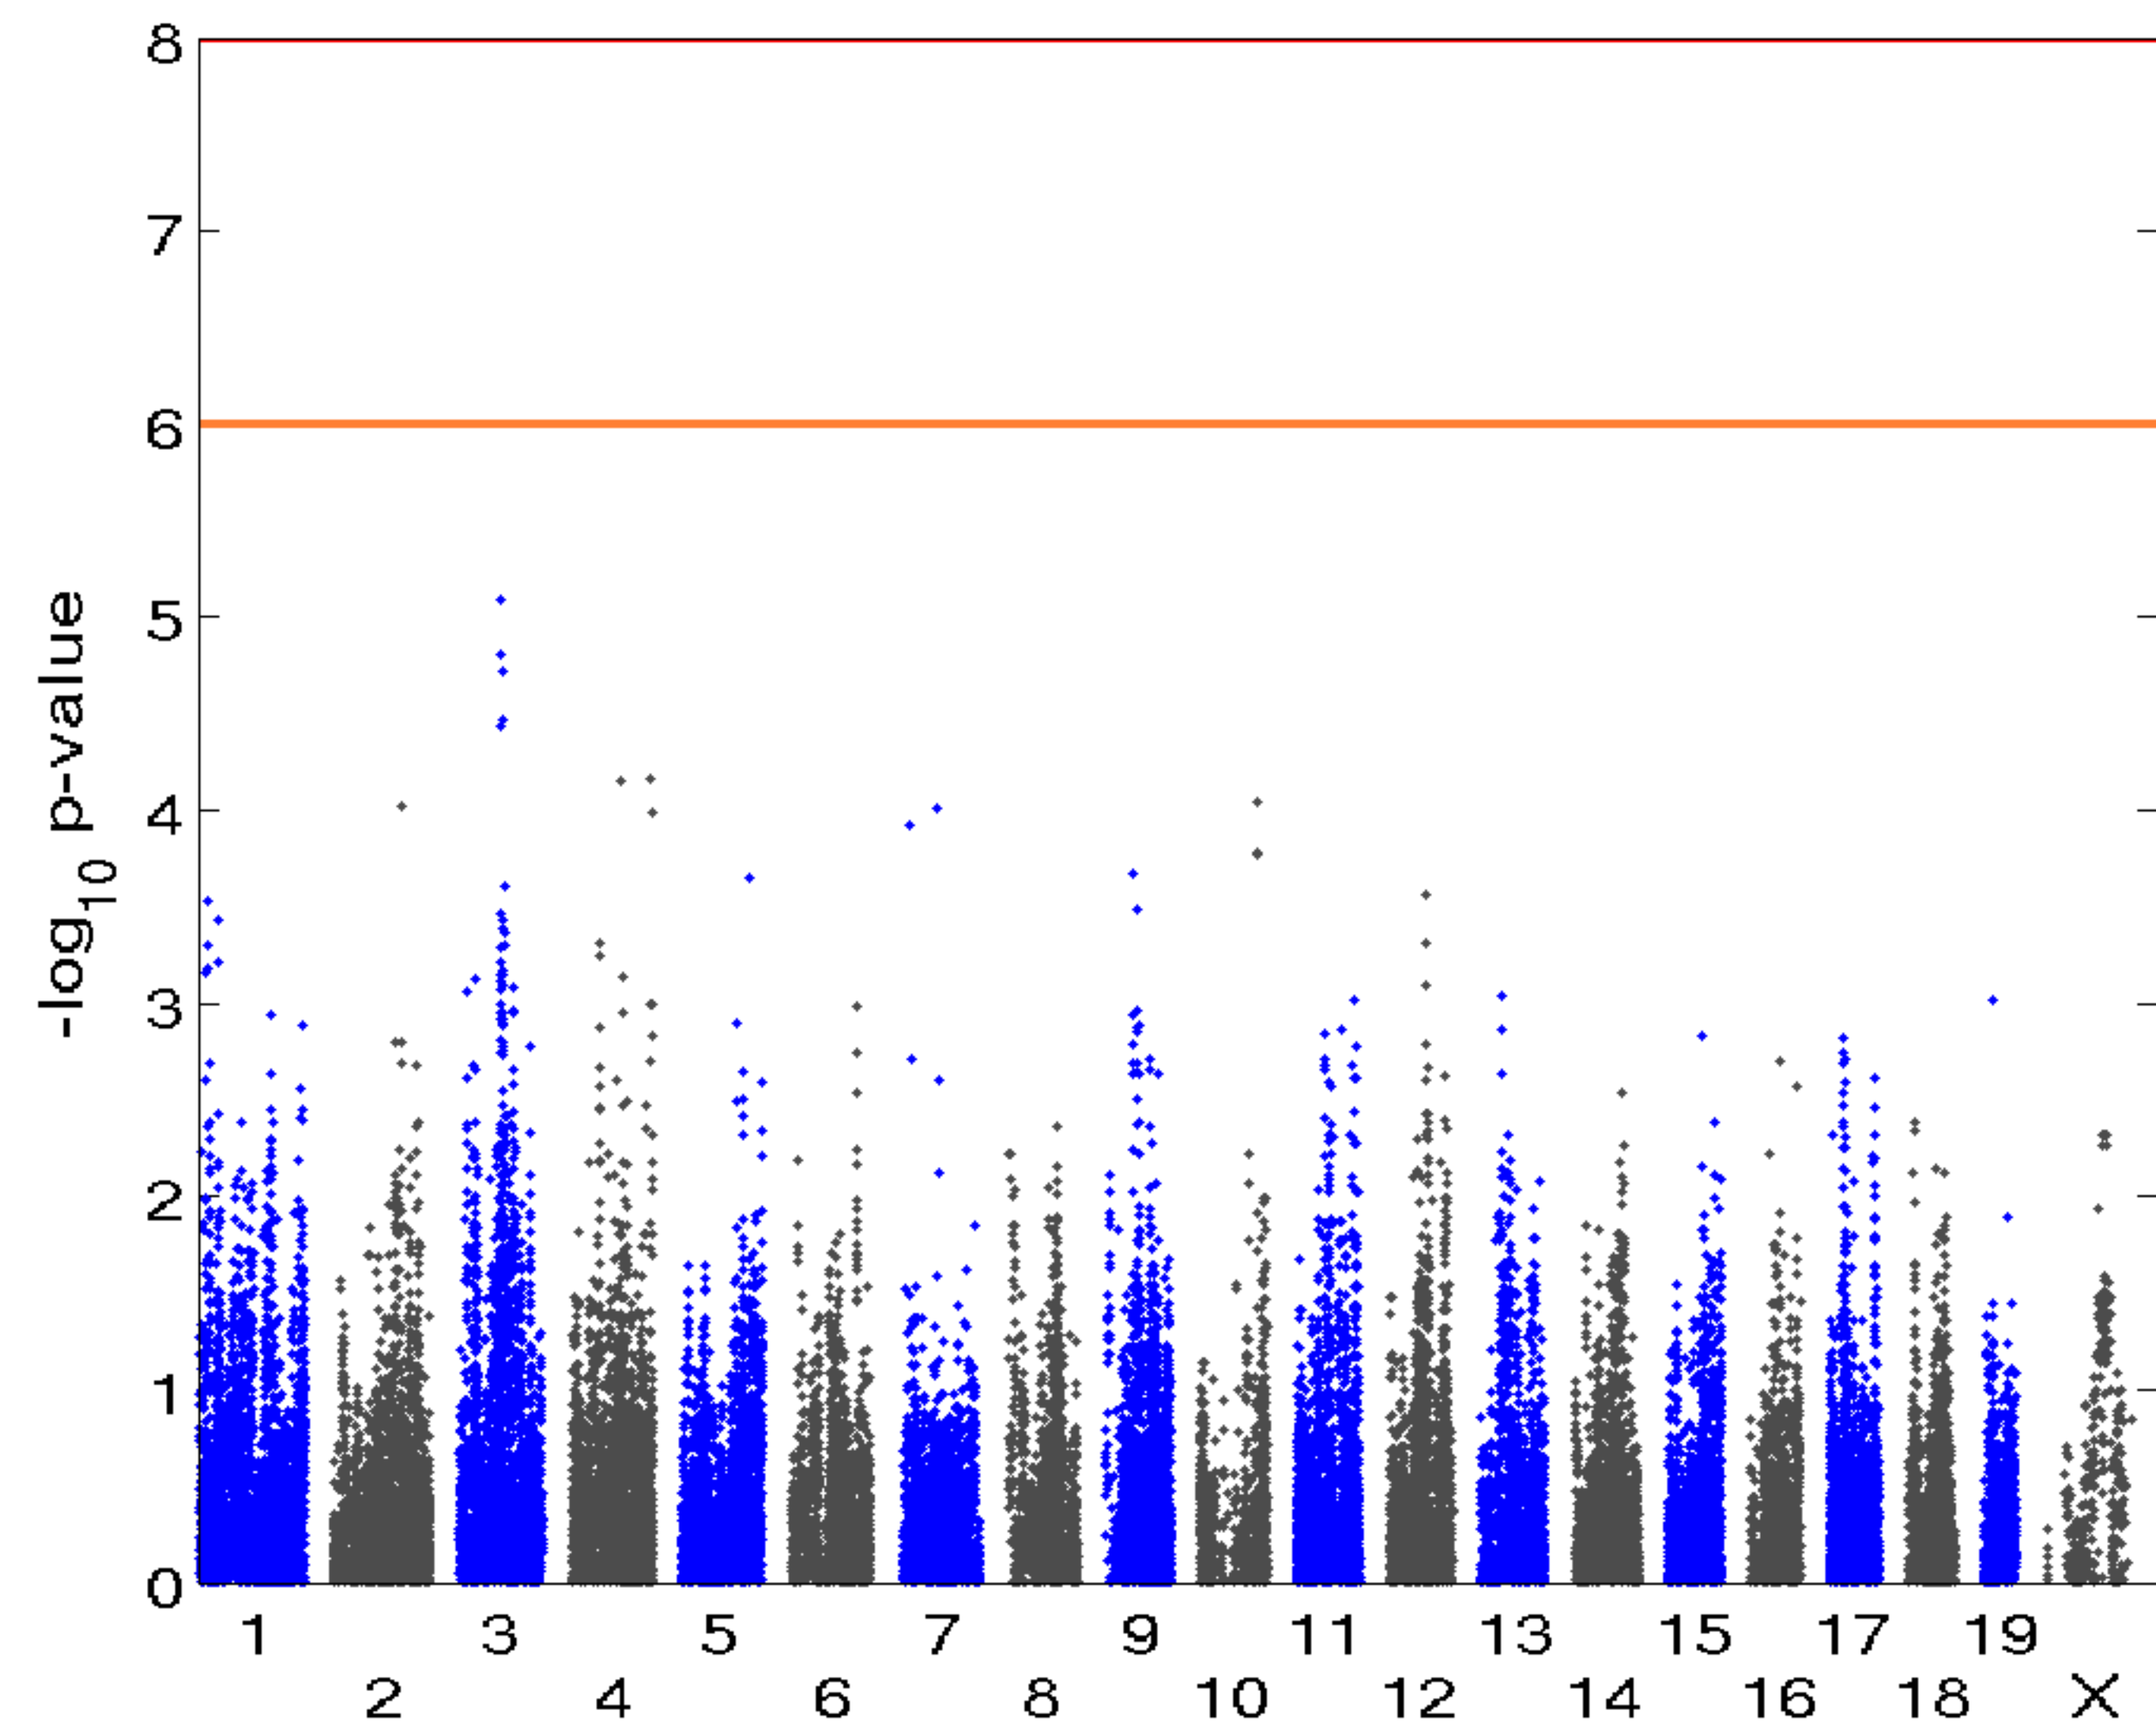

VWI - ctr

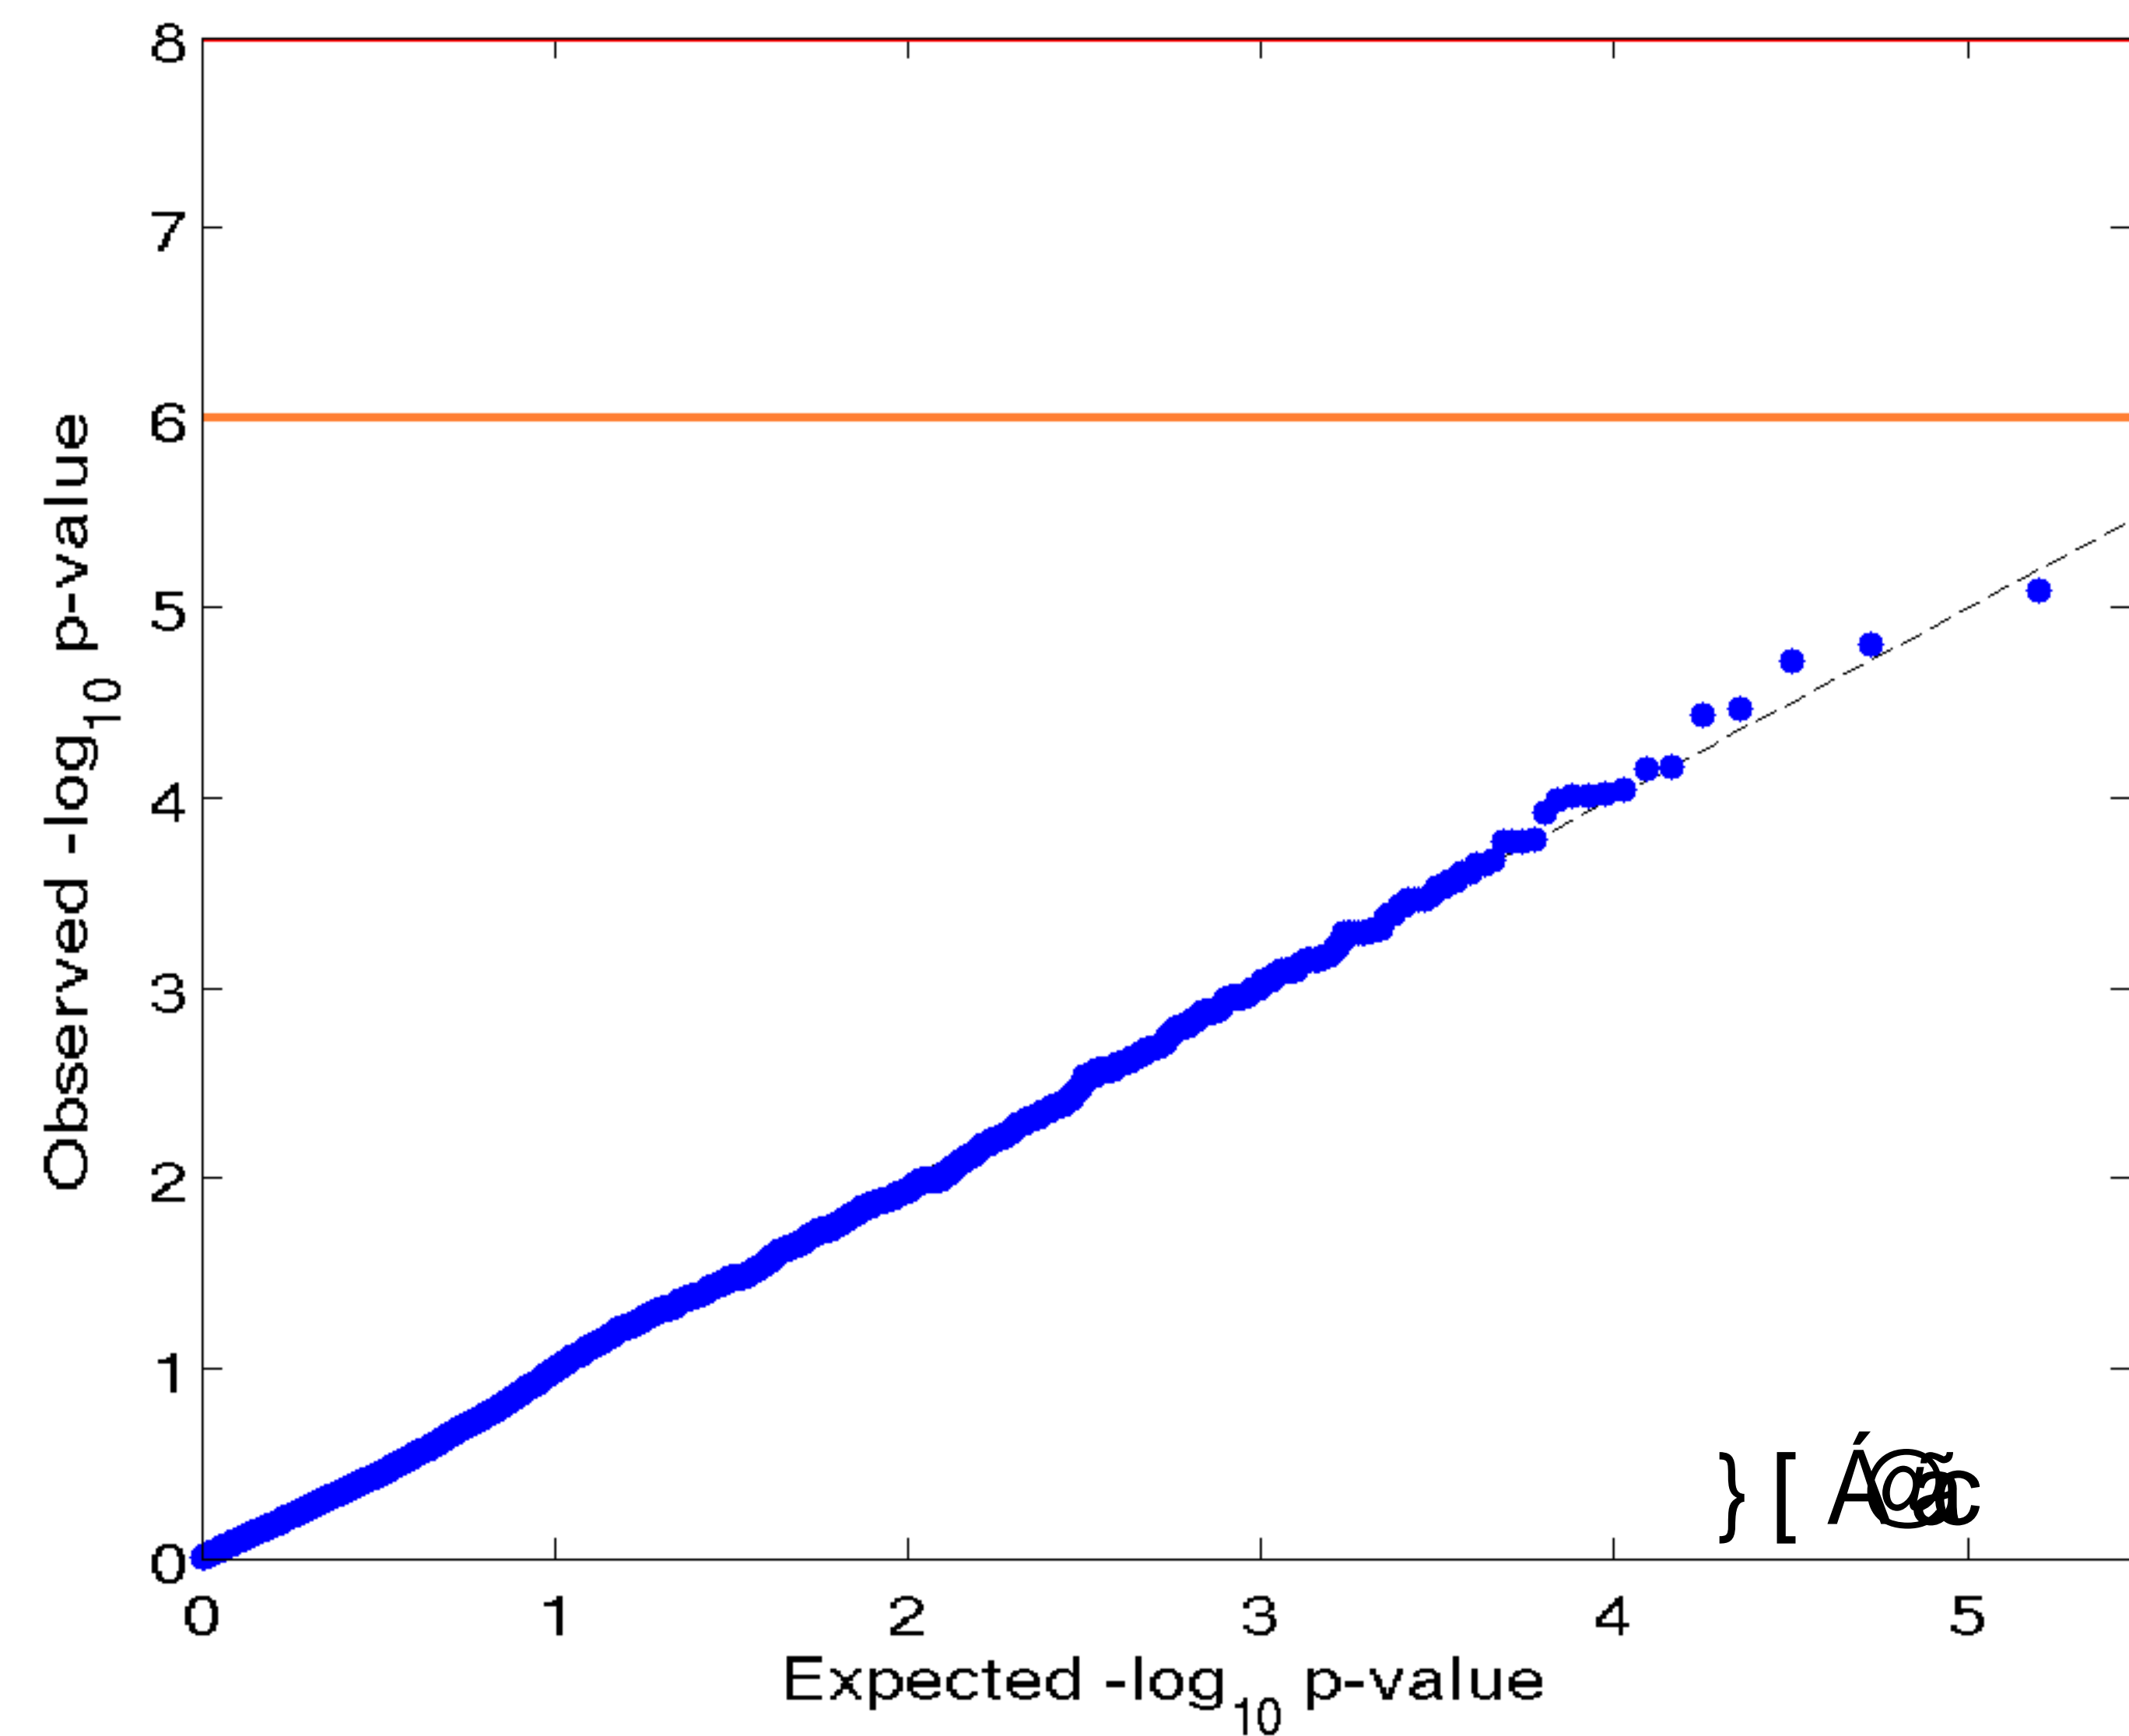

VW - ctr

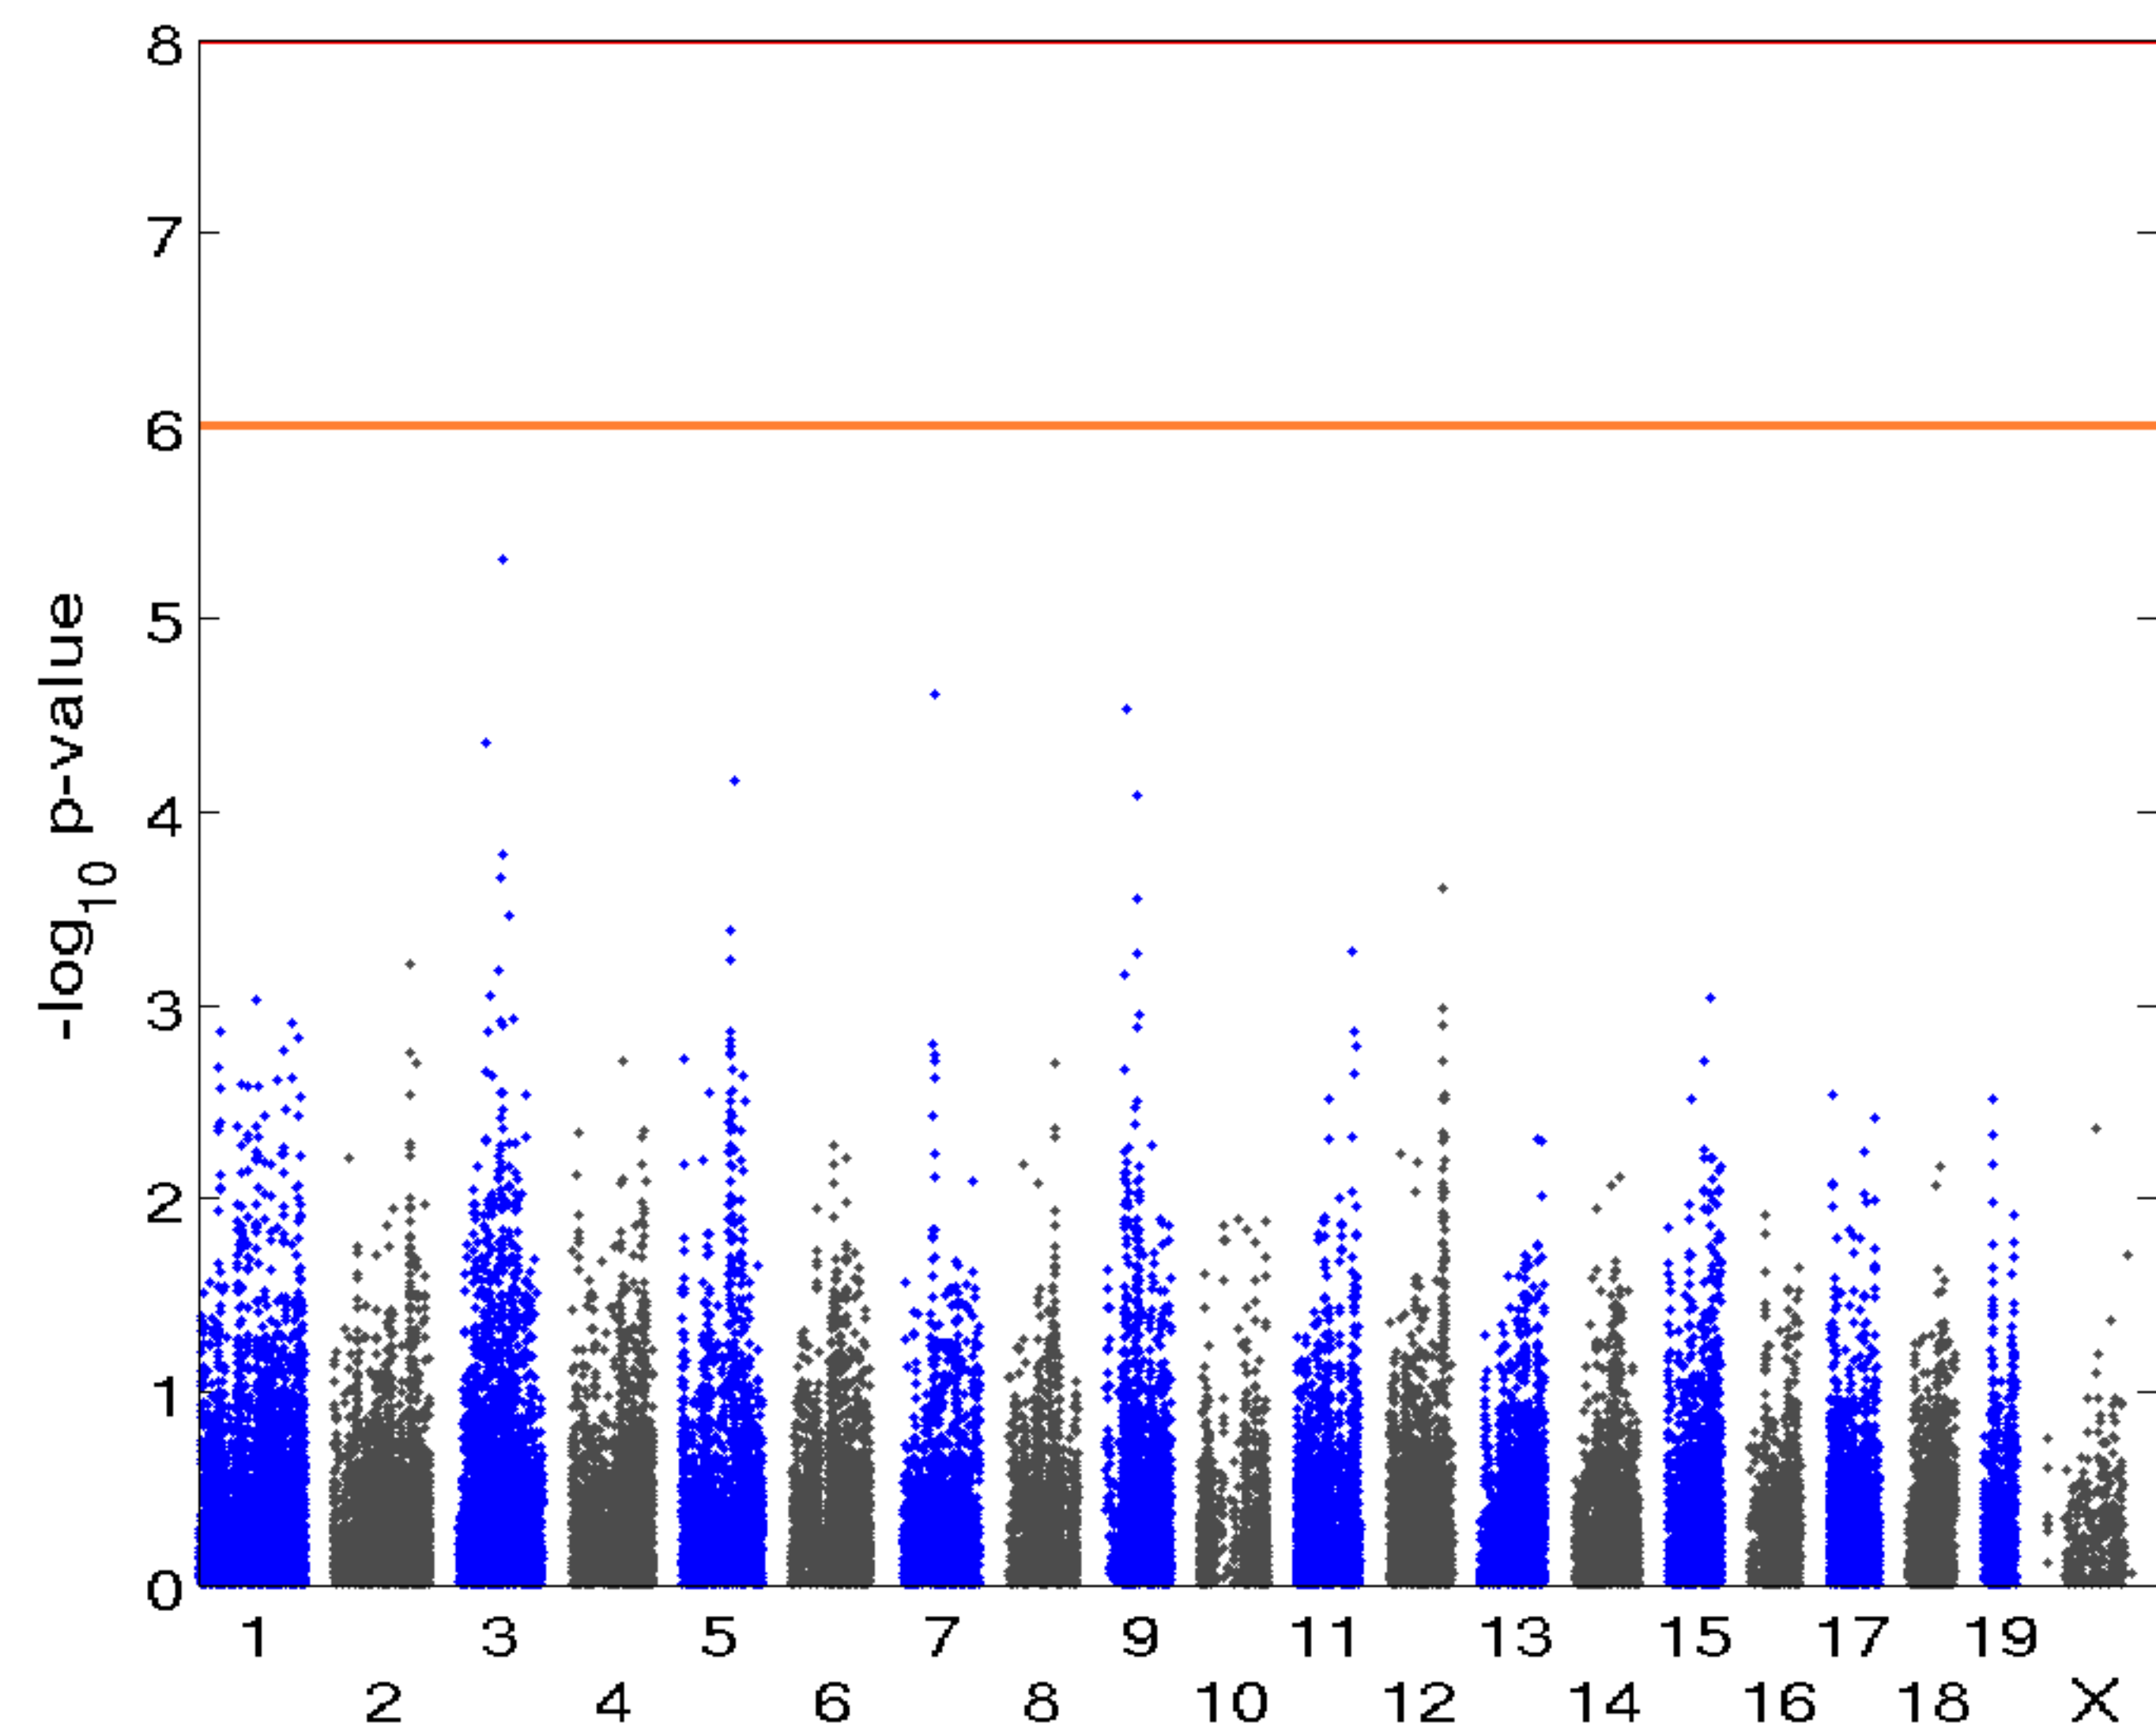

VW - ctr

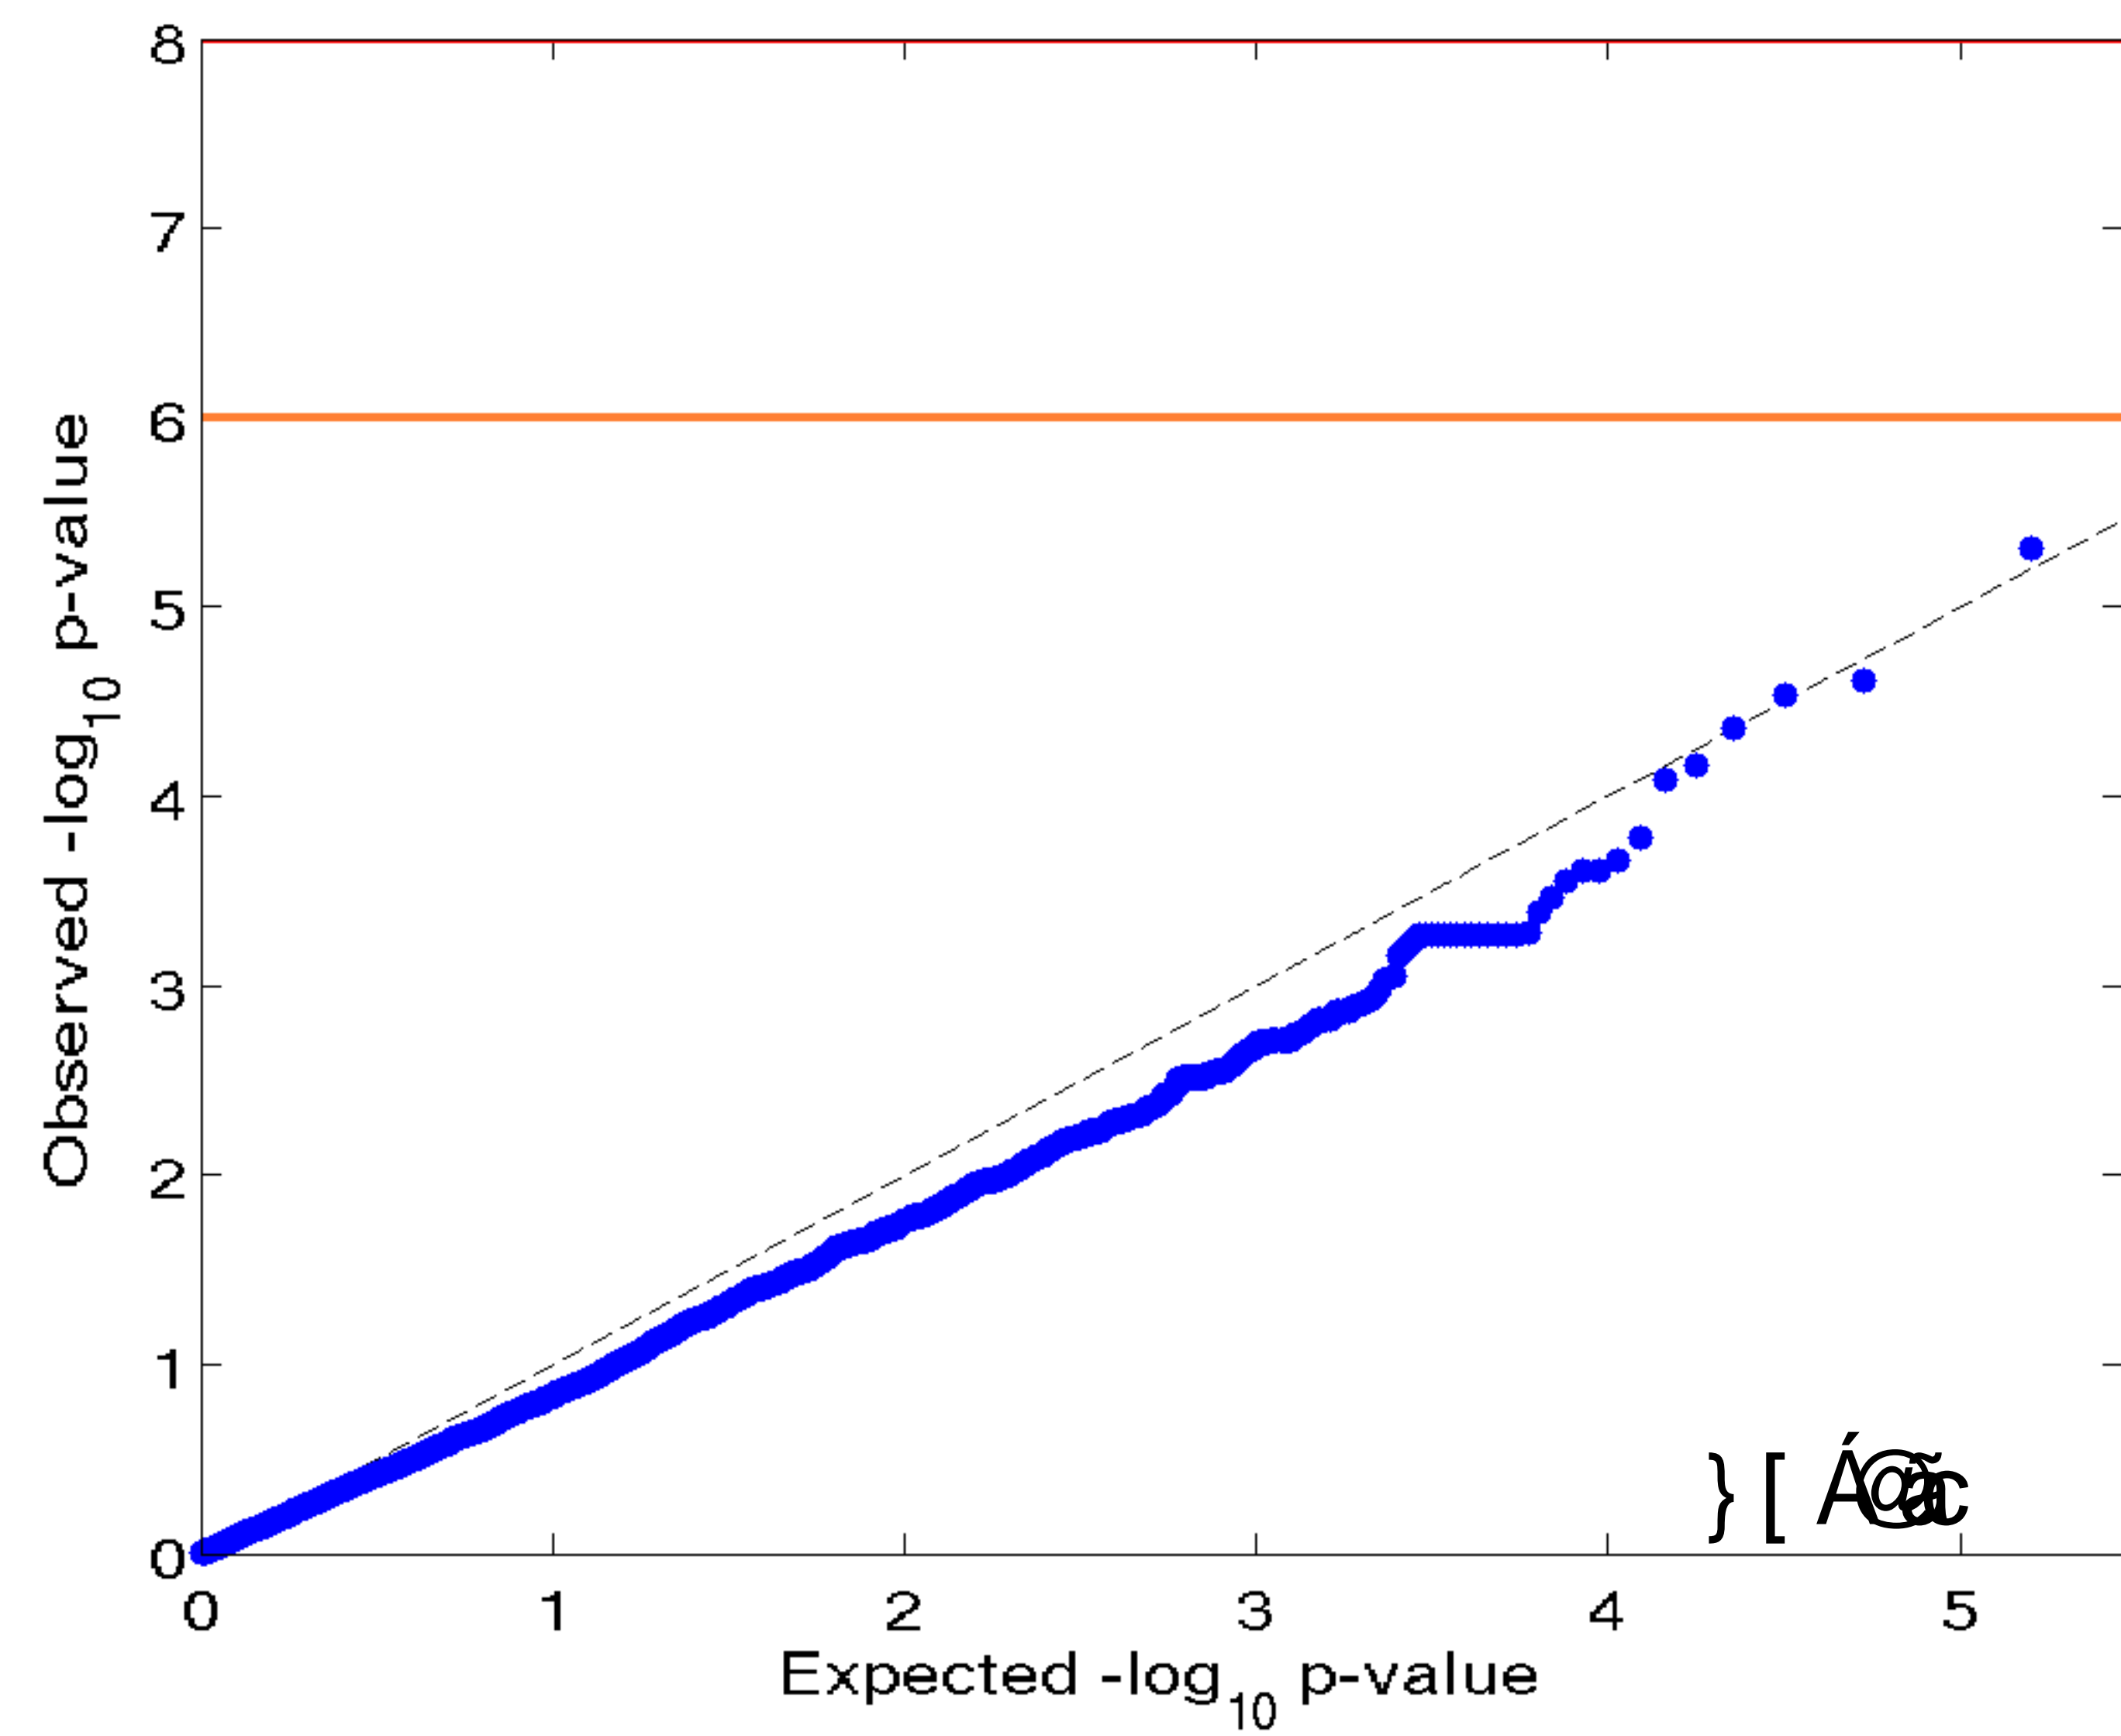

Supplement: S1 (10.1371/journal.pone.0041032.s001) [file journal.pone.0041032.s001]
