# Supplementary material for: Mapping Genetic Variants Associated with Beta-Adrenergic Responses in Inbred Mice
Source: PLOS journal article supplement (doi:10.1371/journal.pone.0041032), 2012-07-31

AW/BWS - iso1

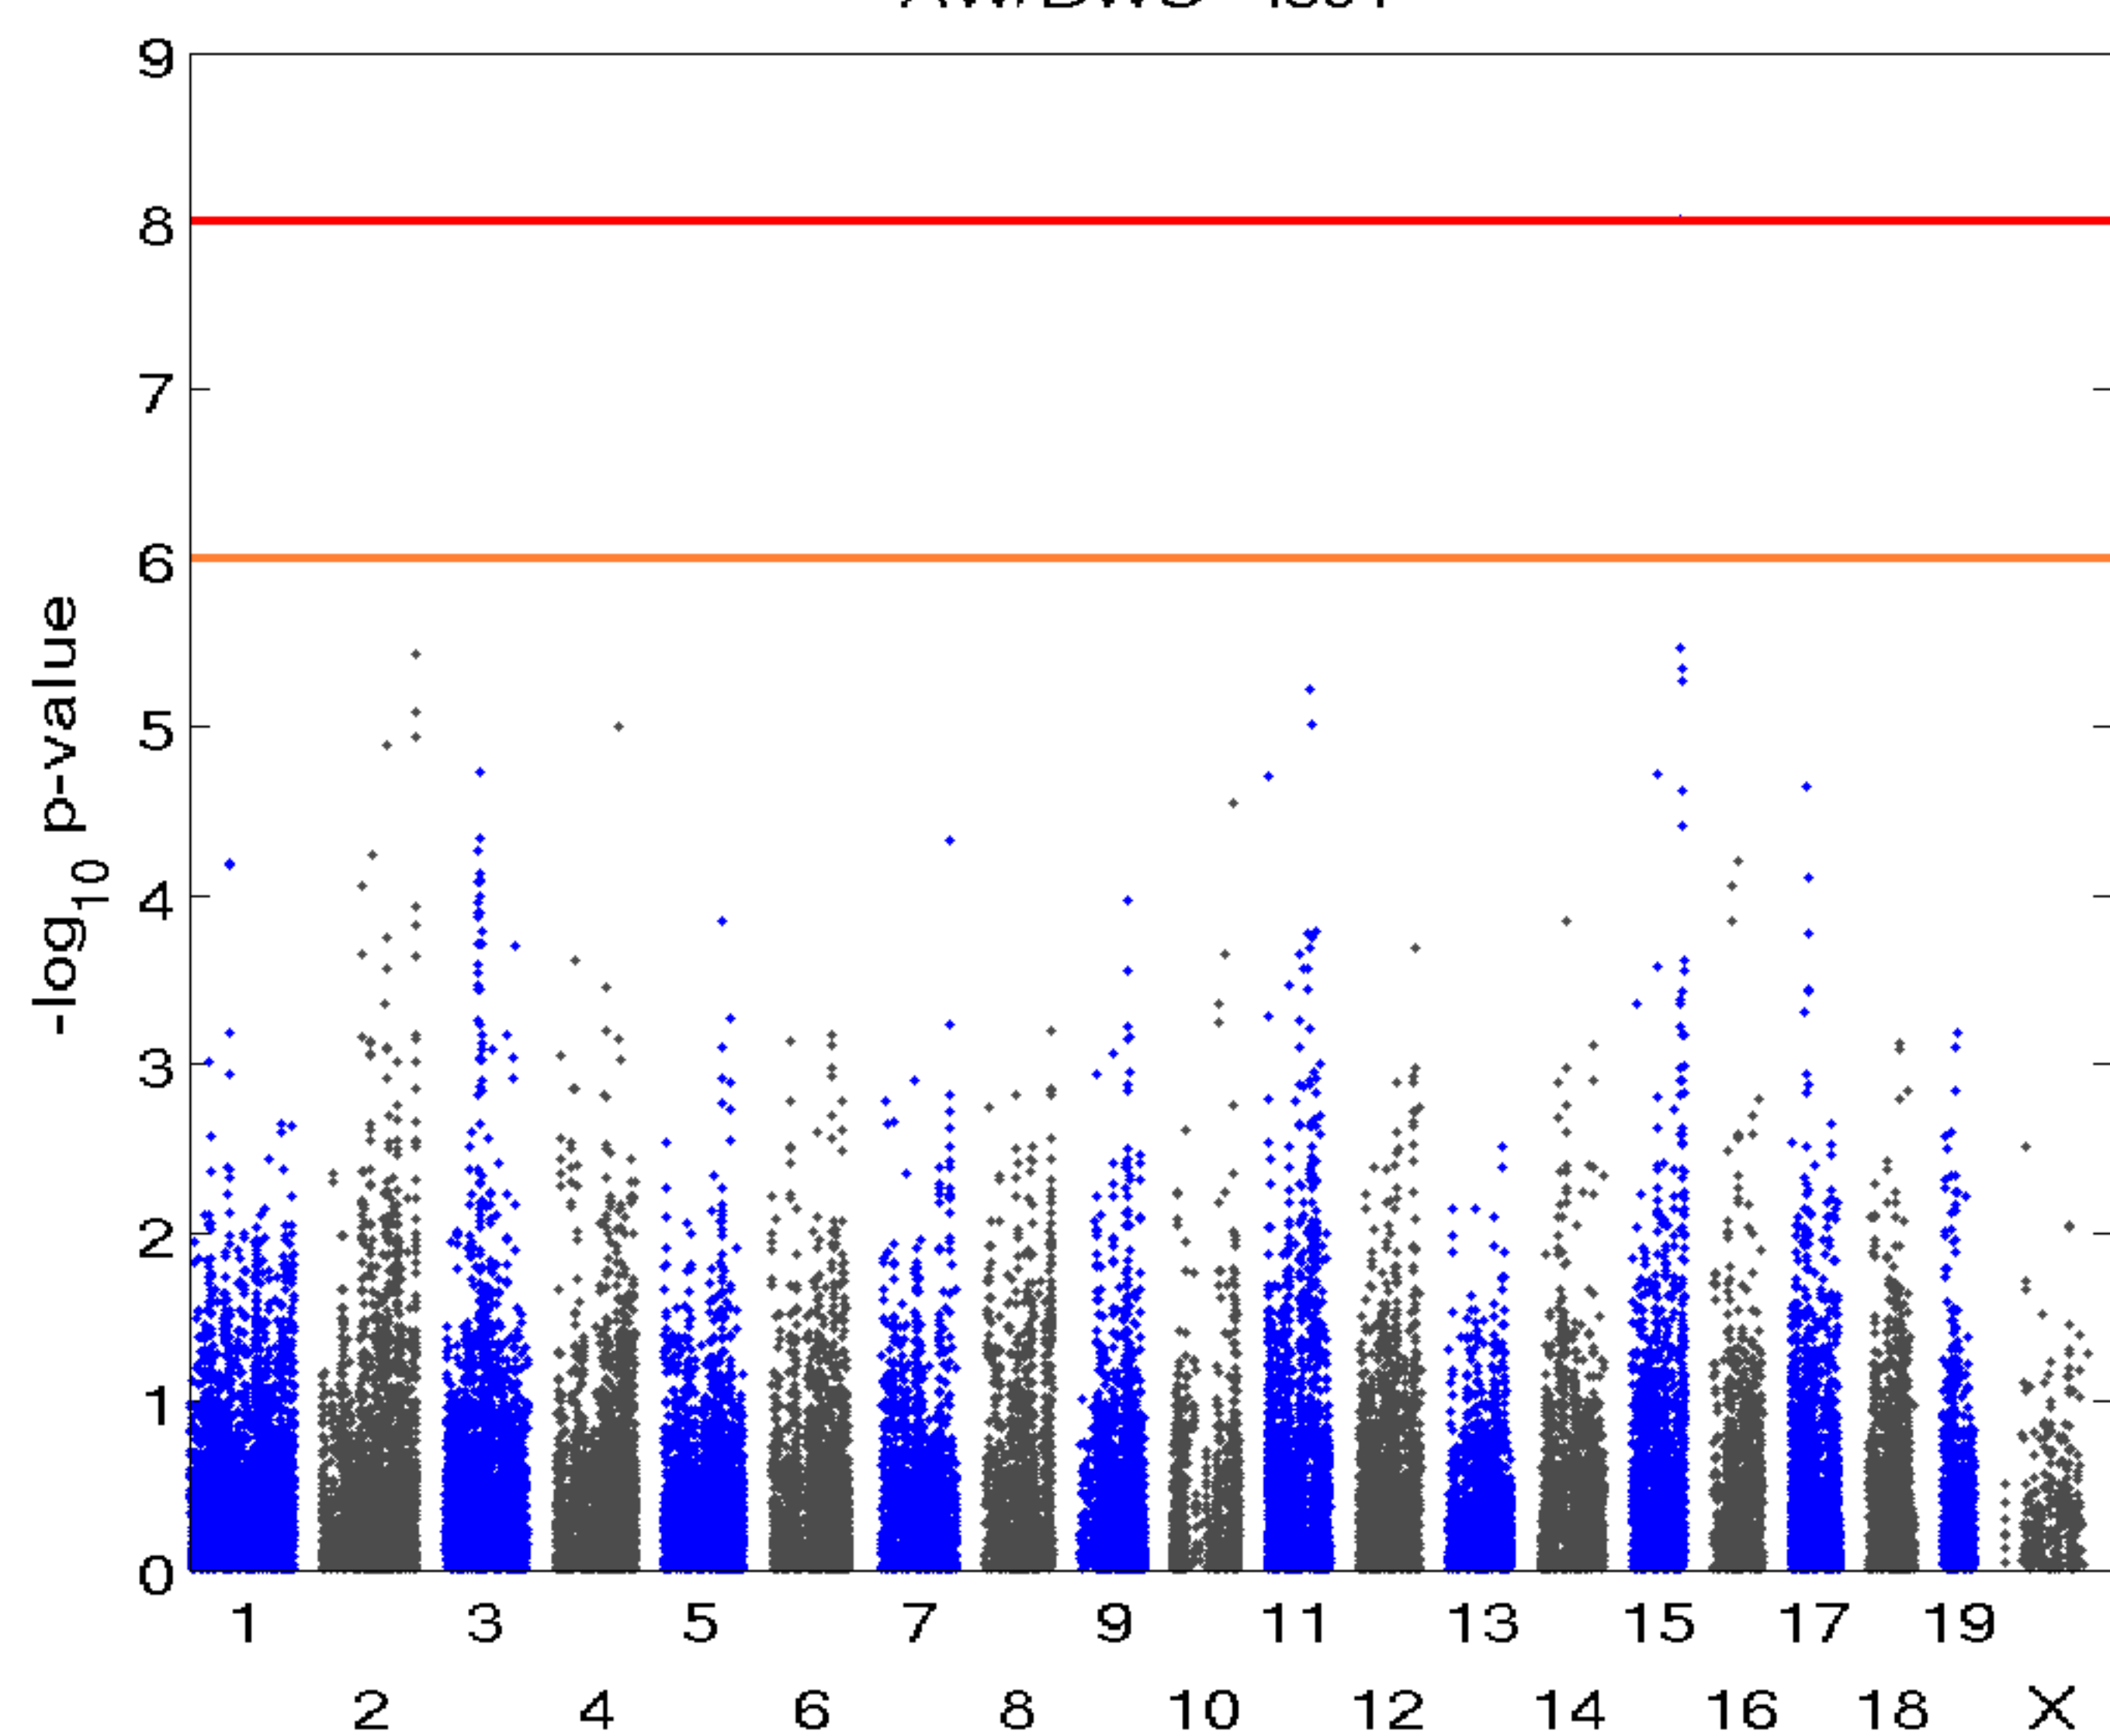

AW/BWS - iso1

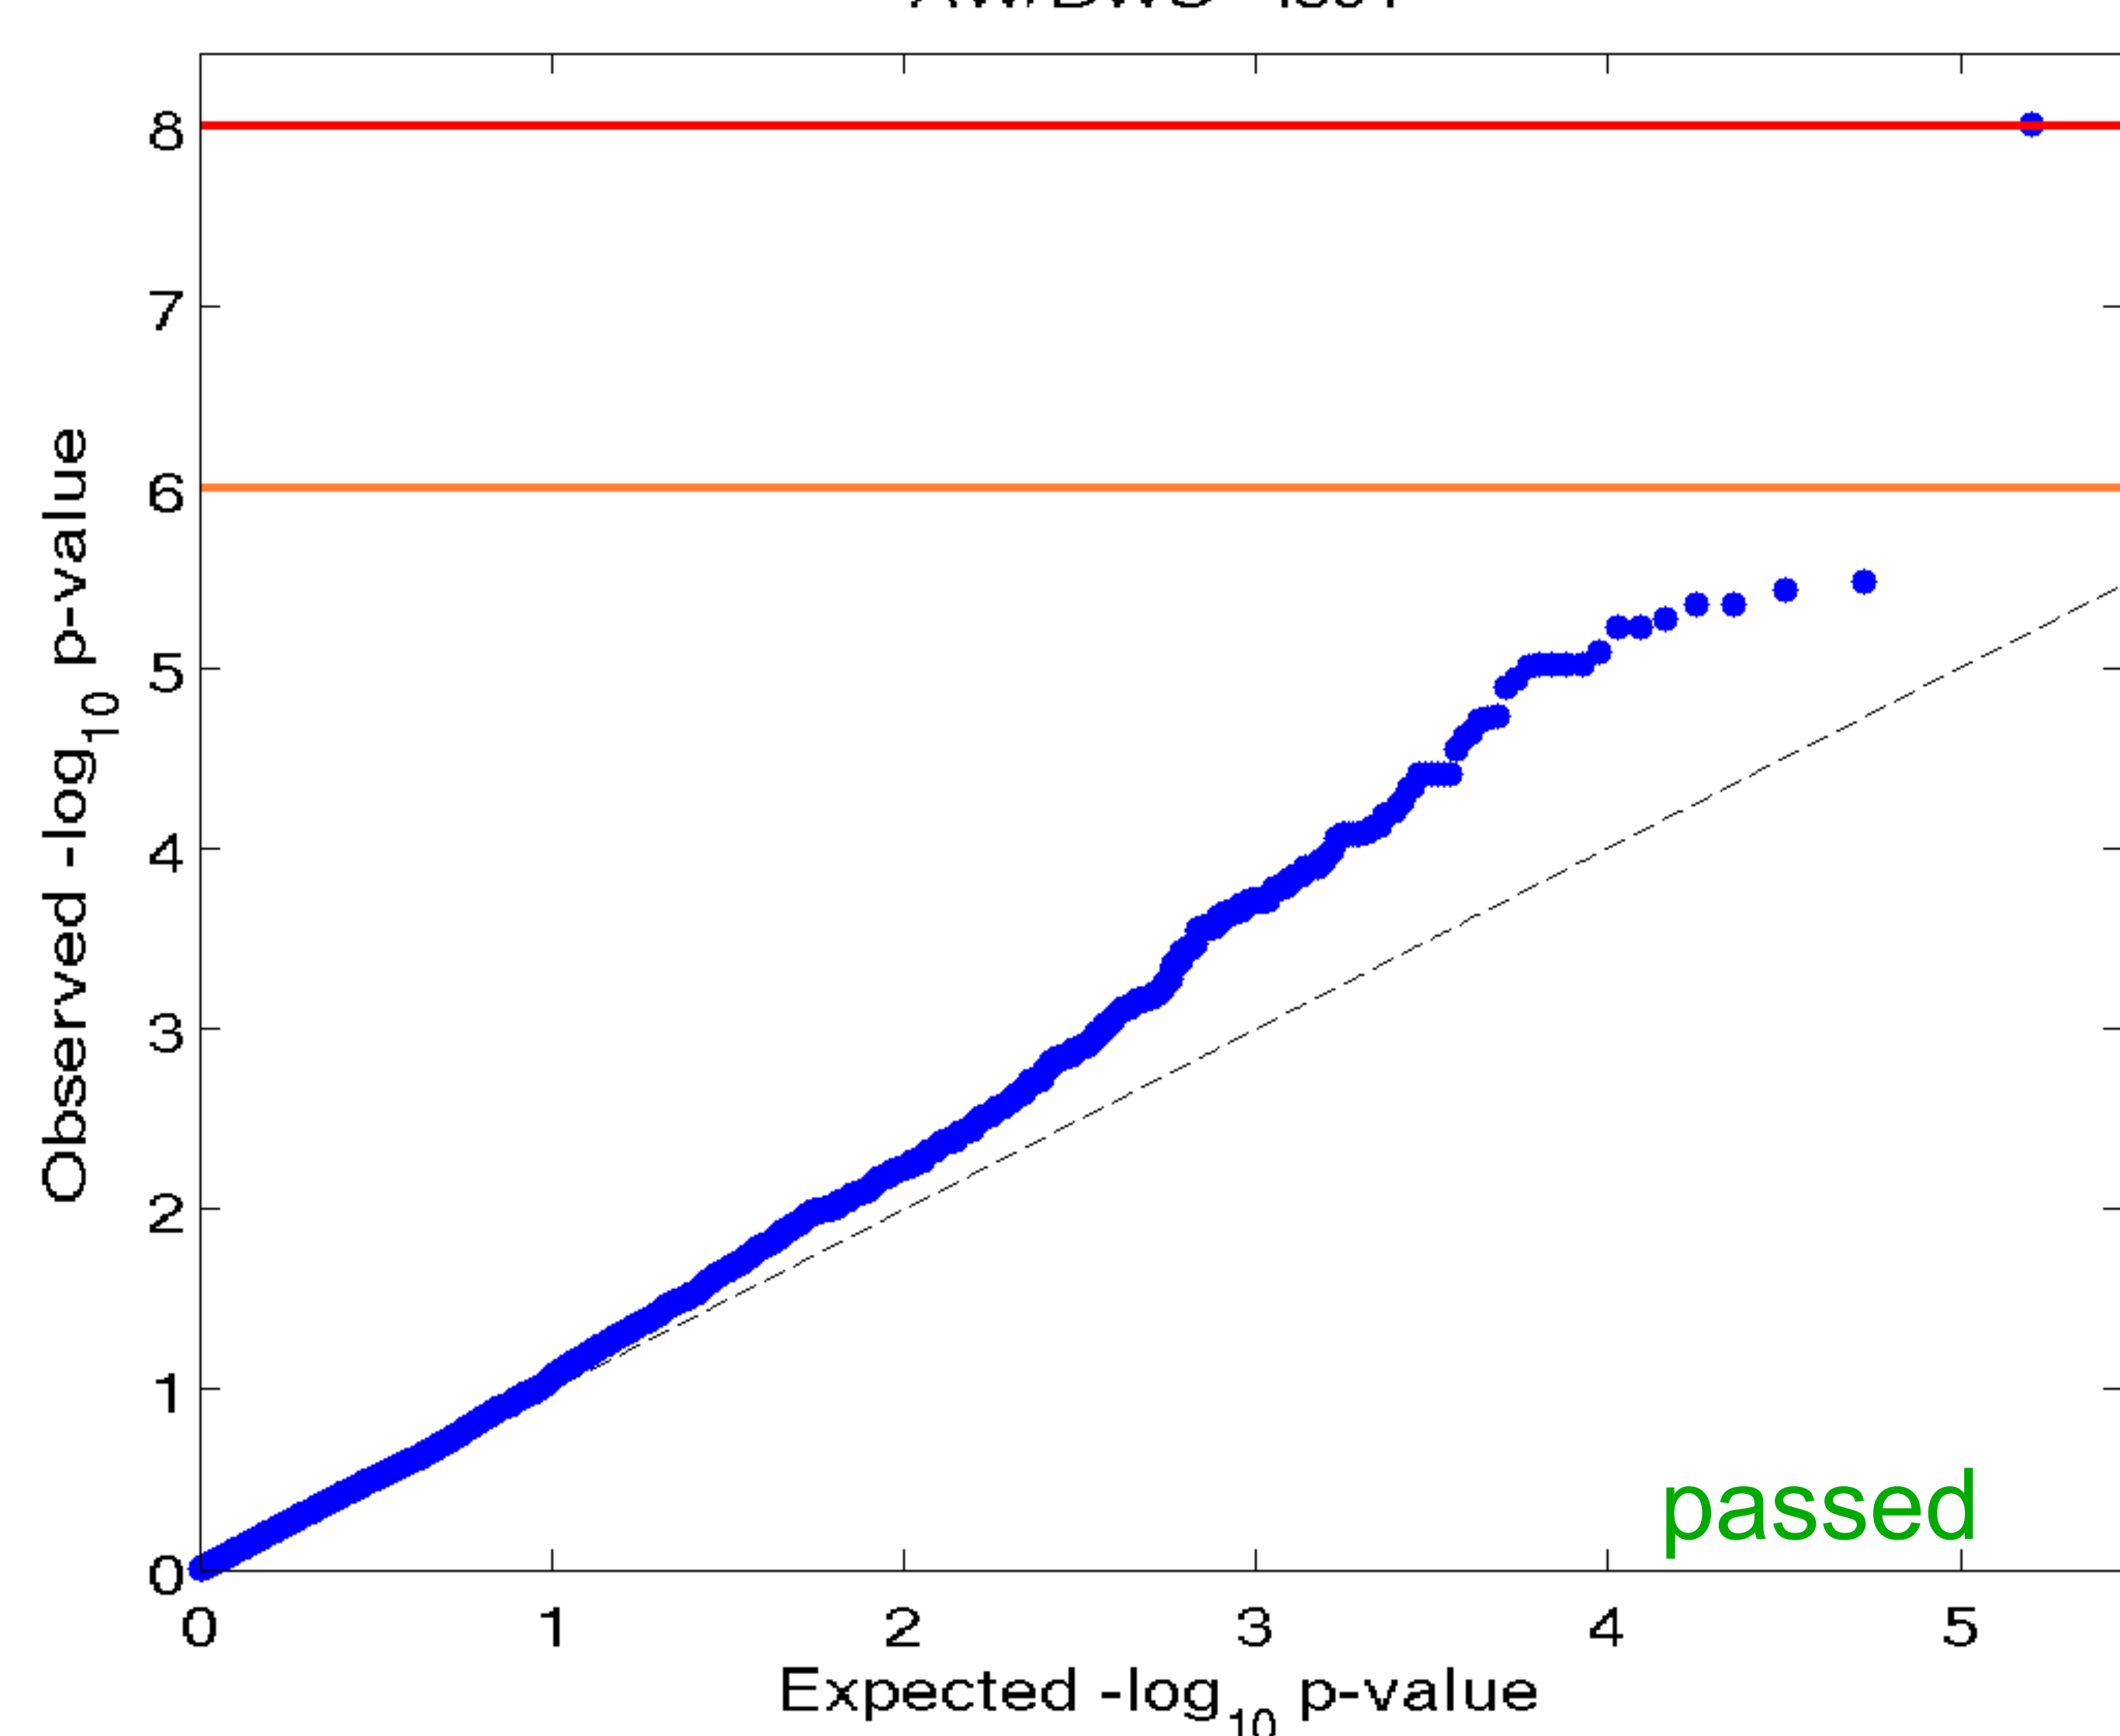

AWI - iso1

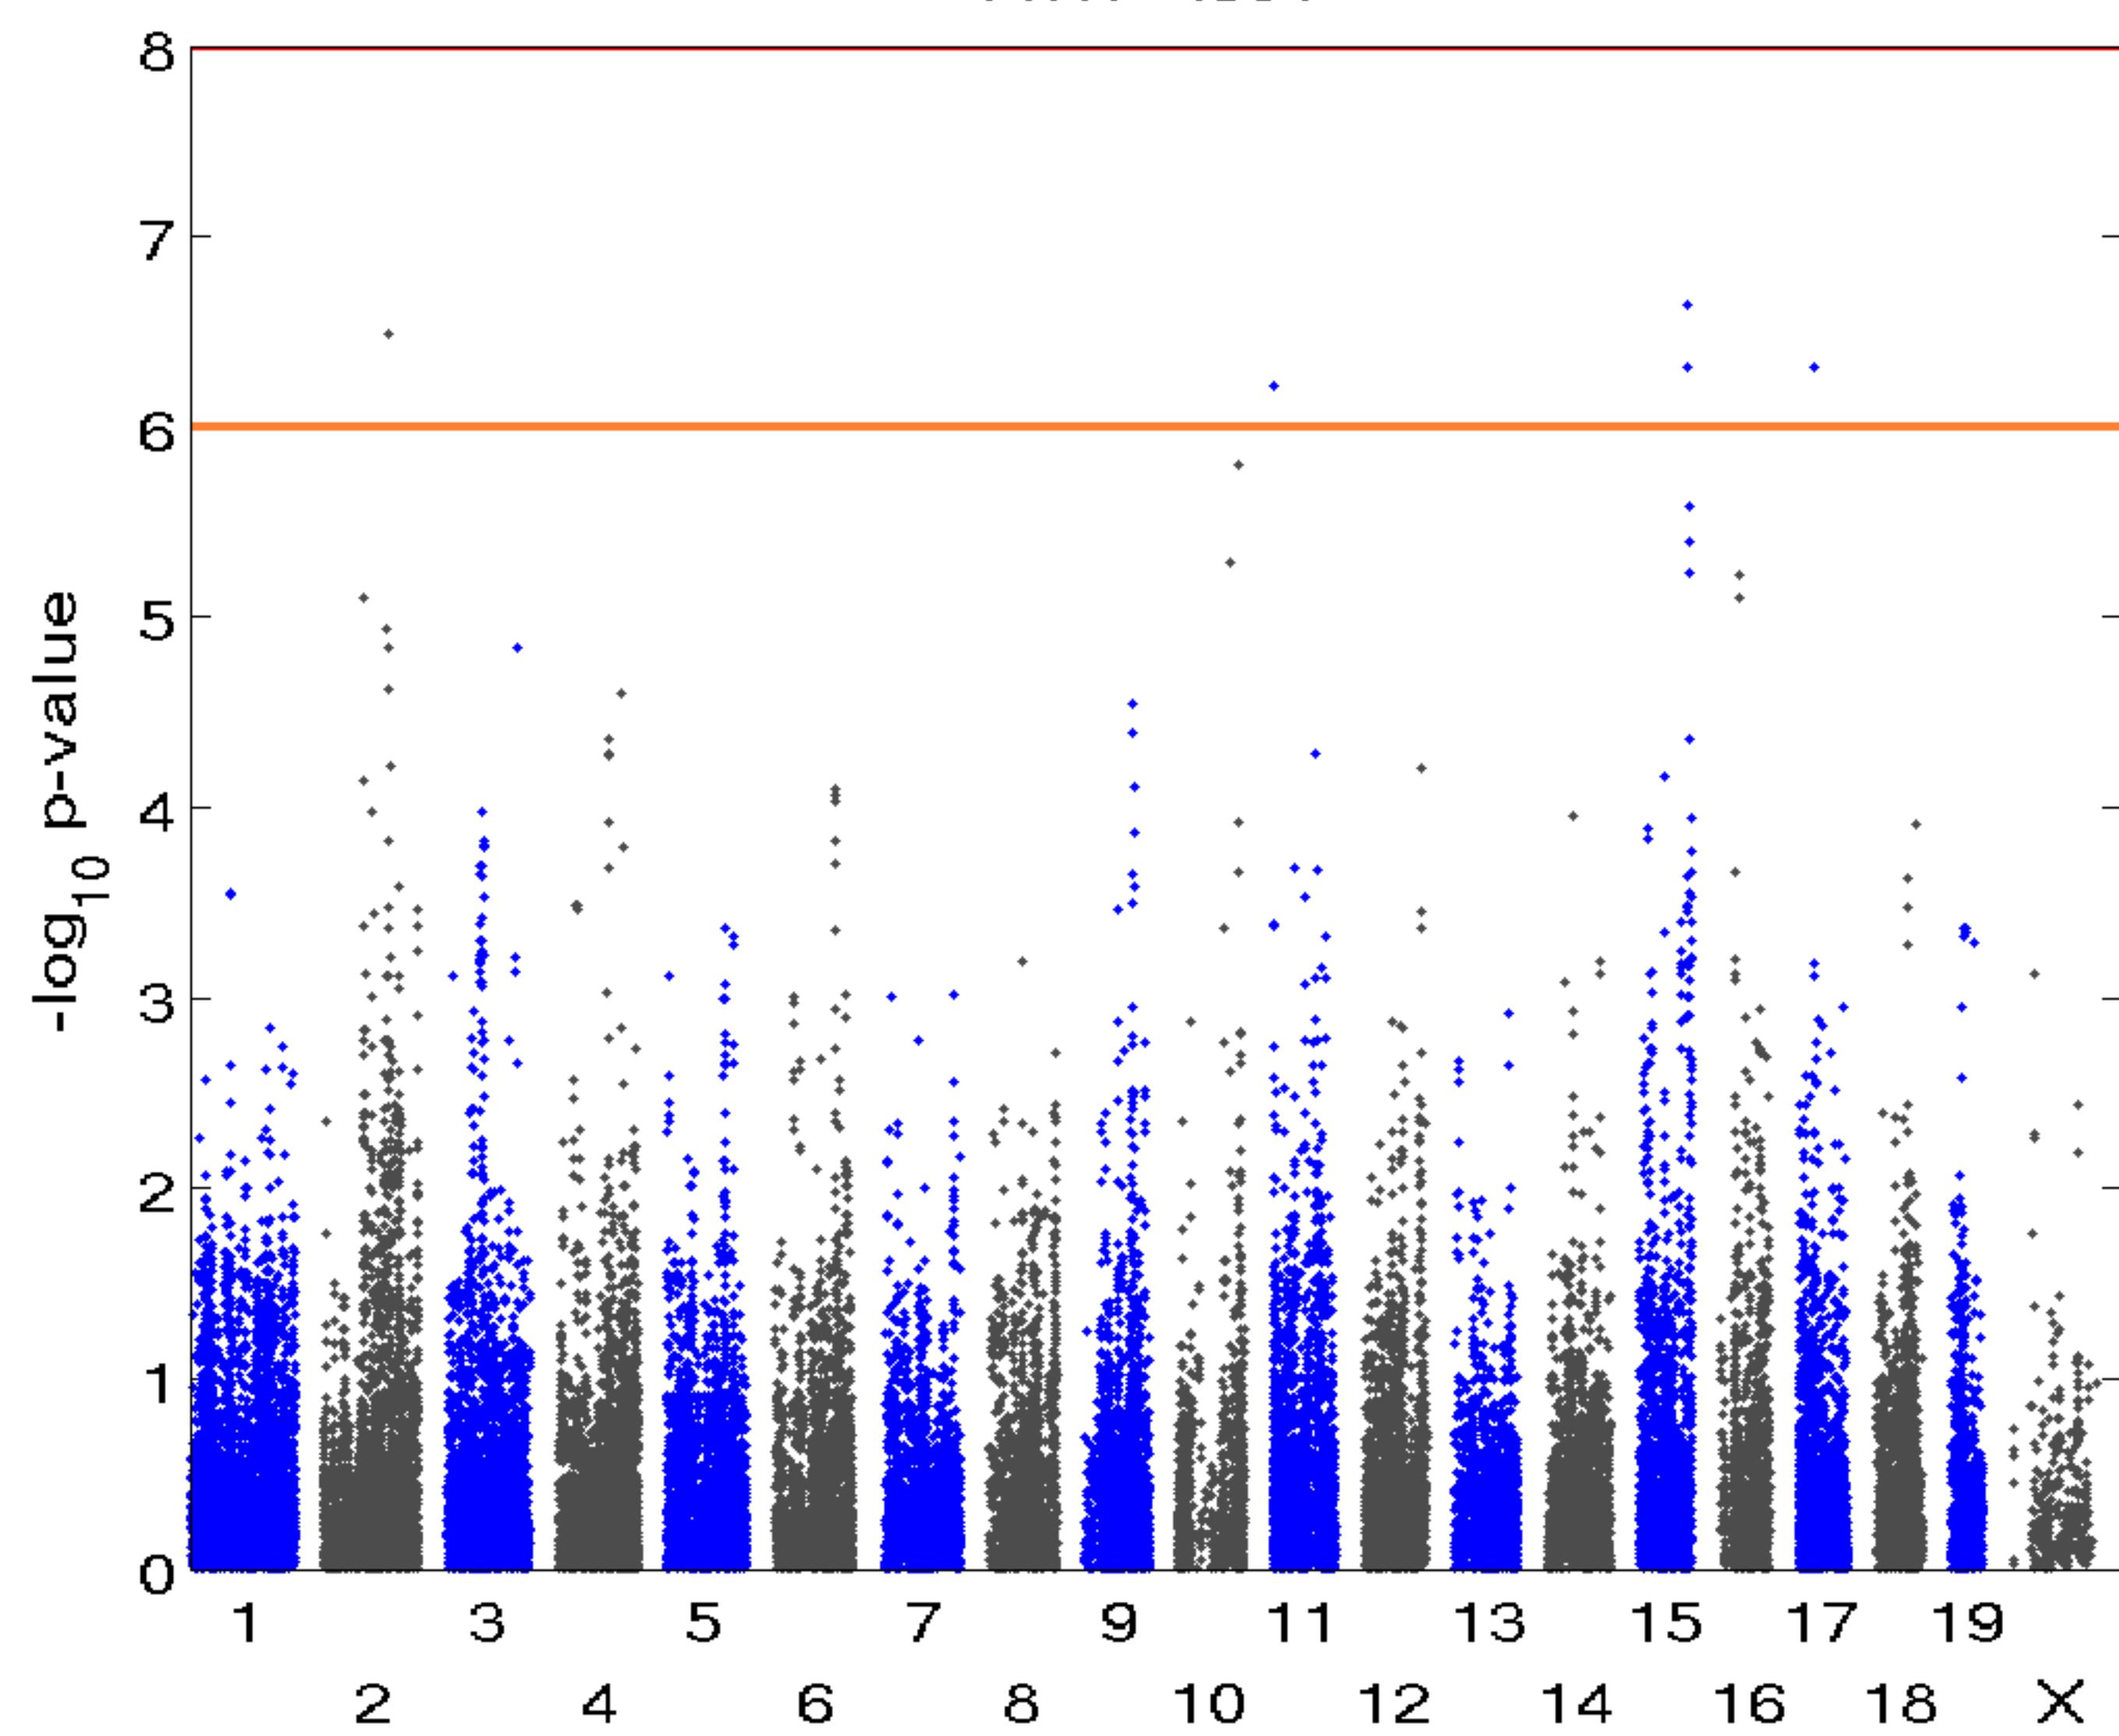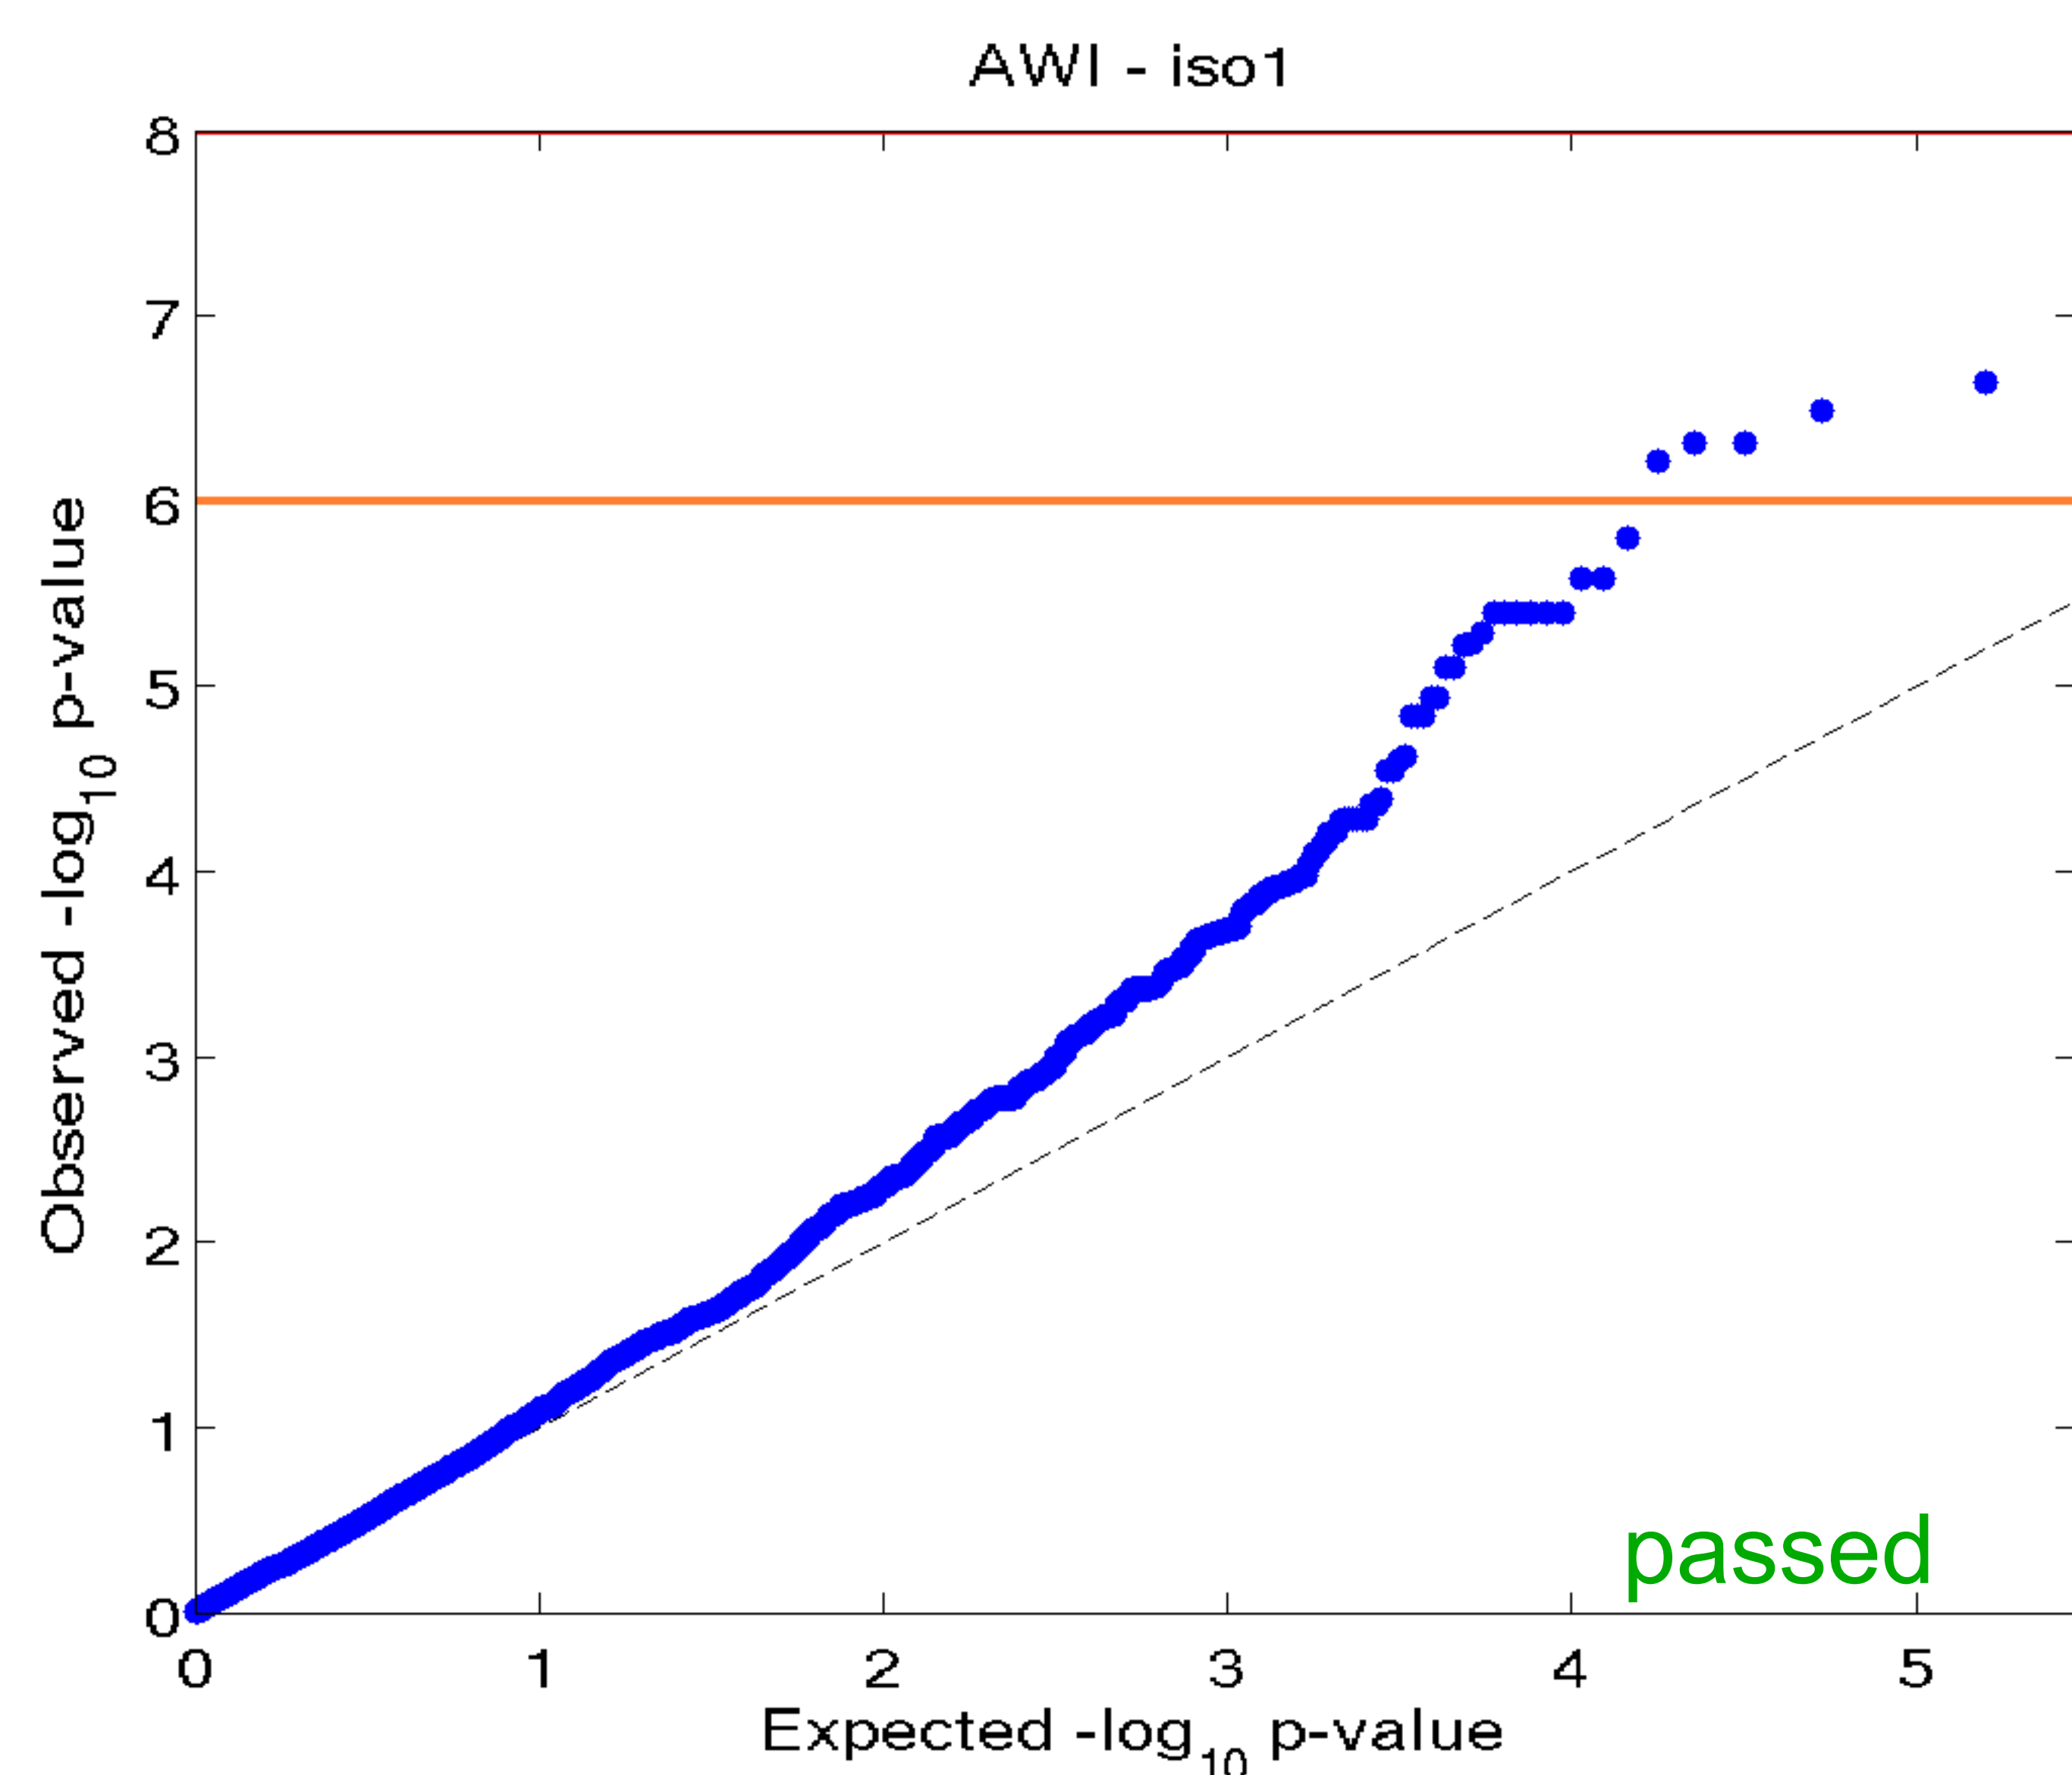

AW - iso1

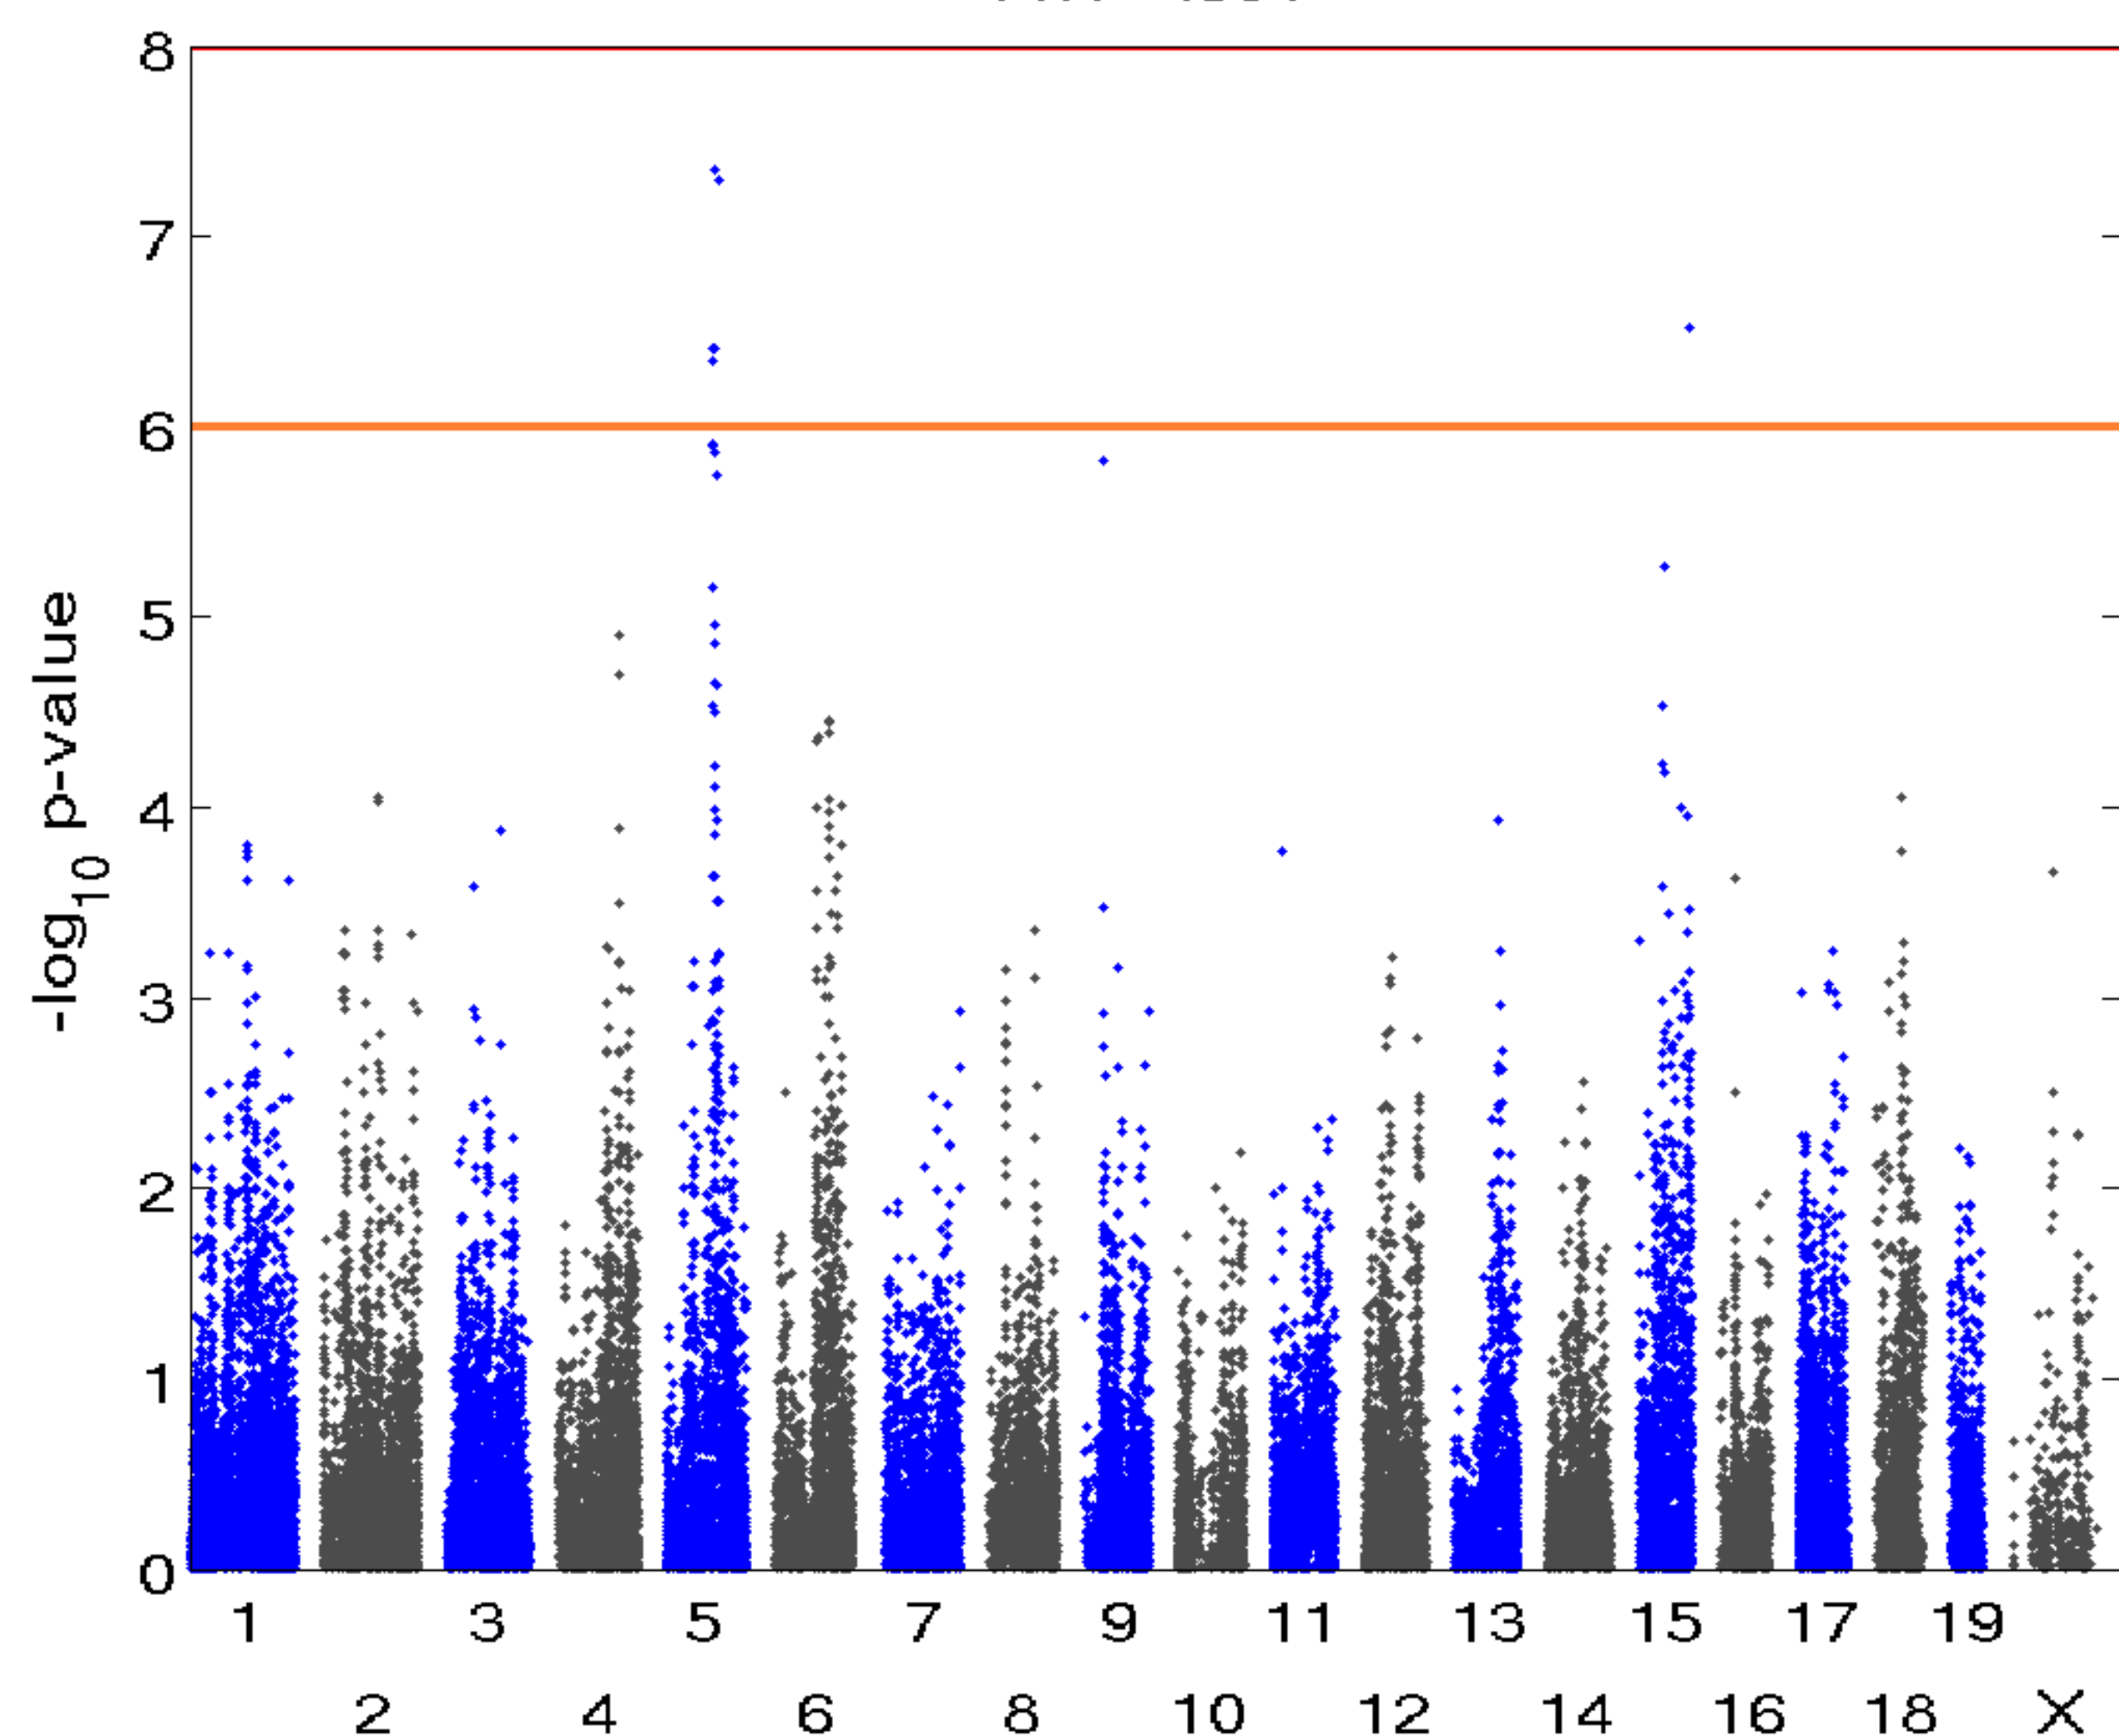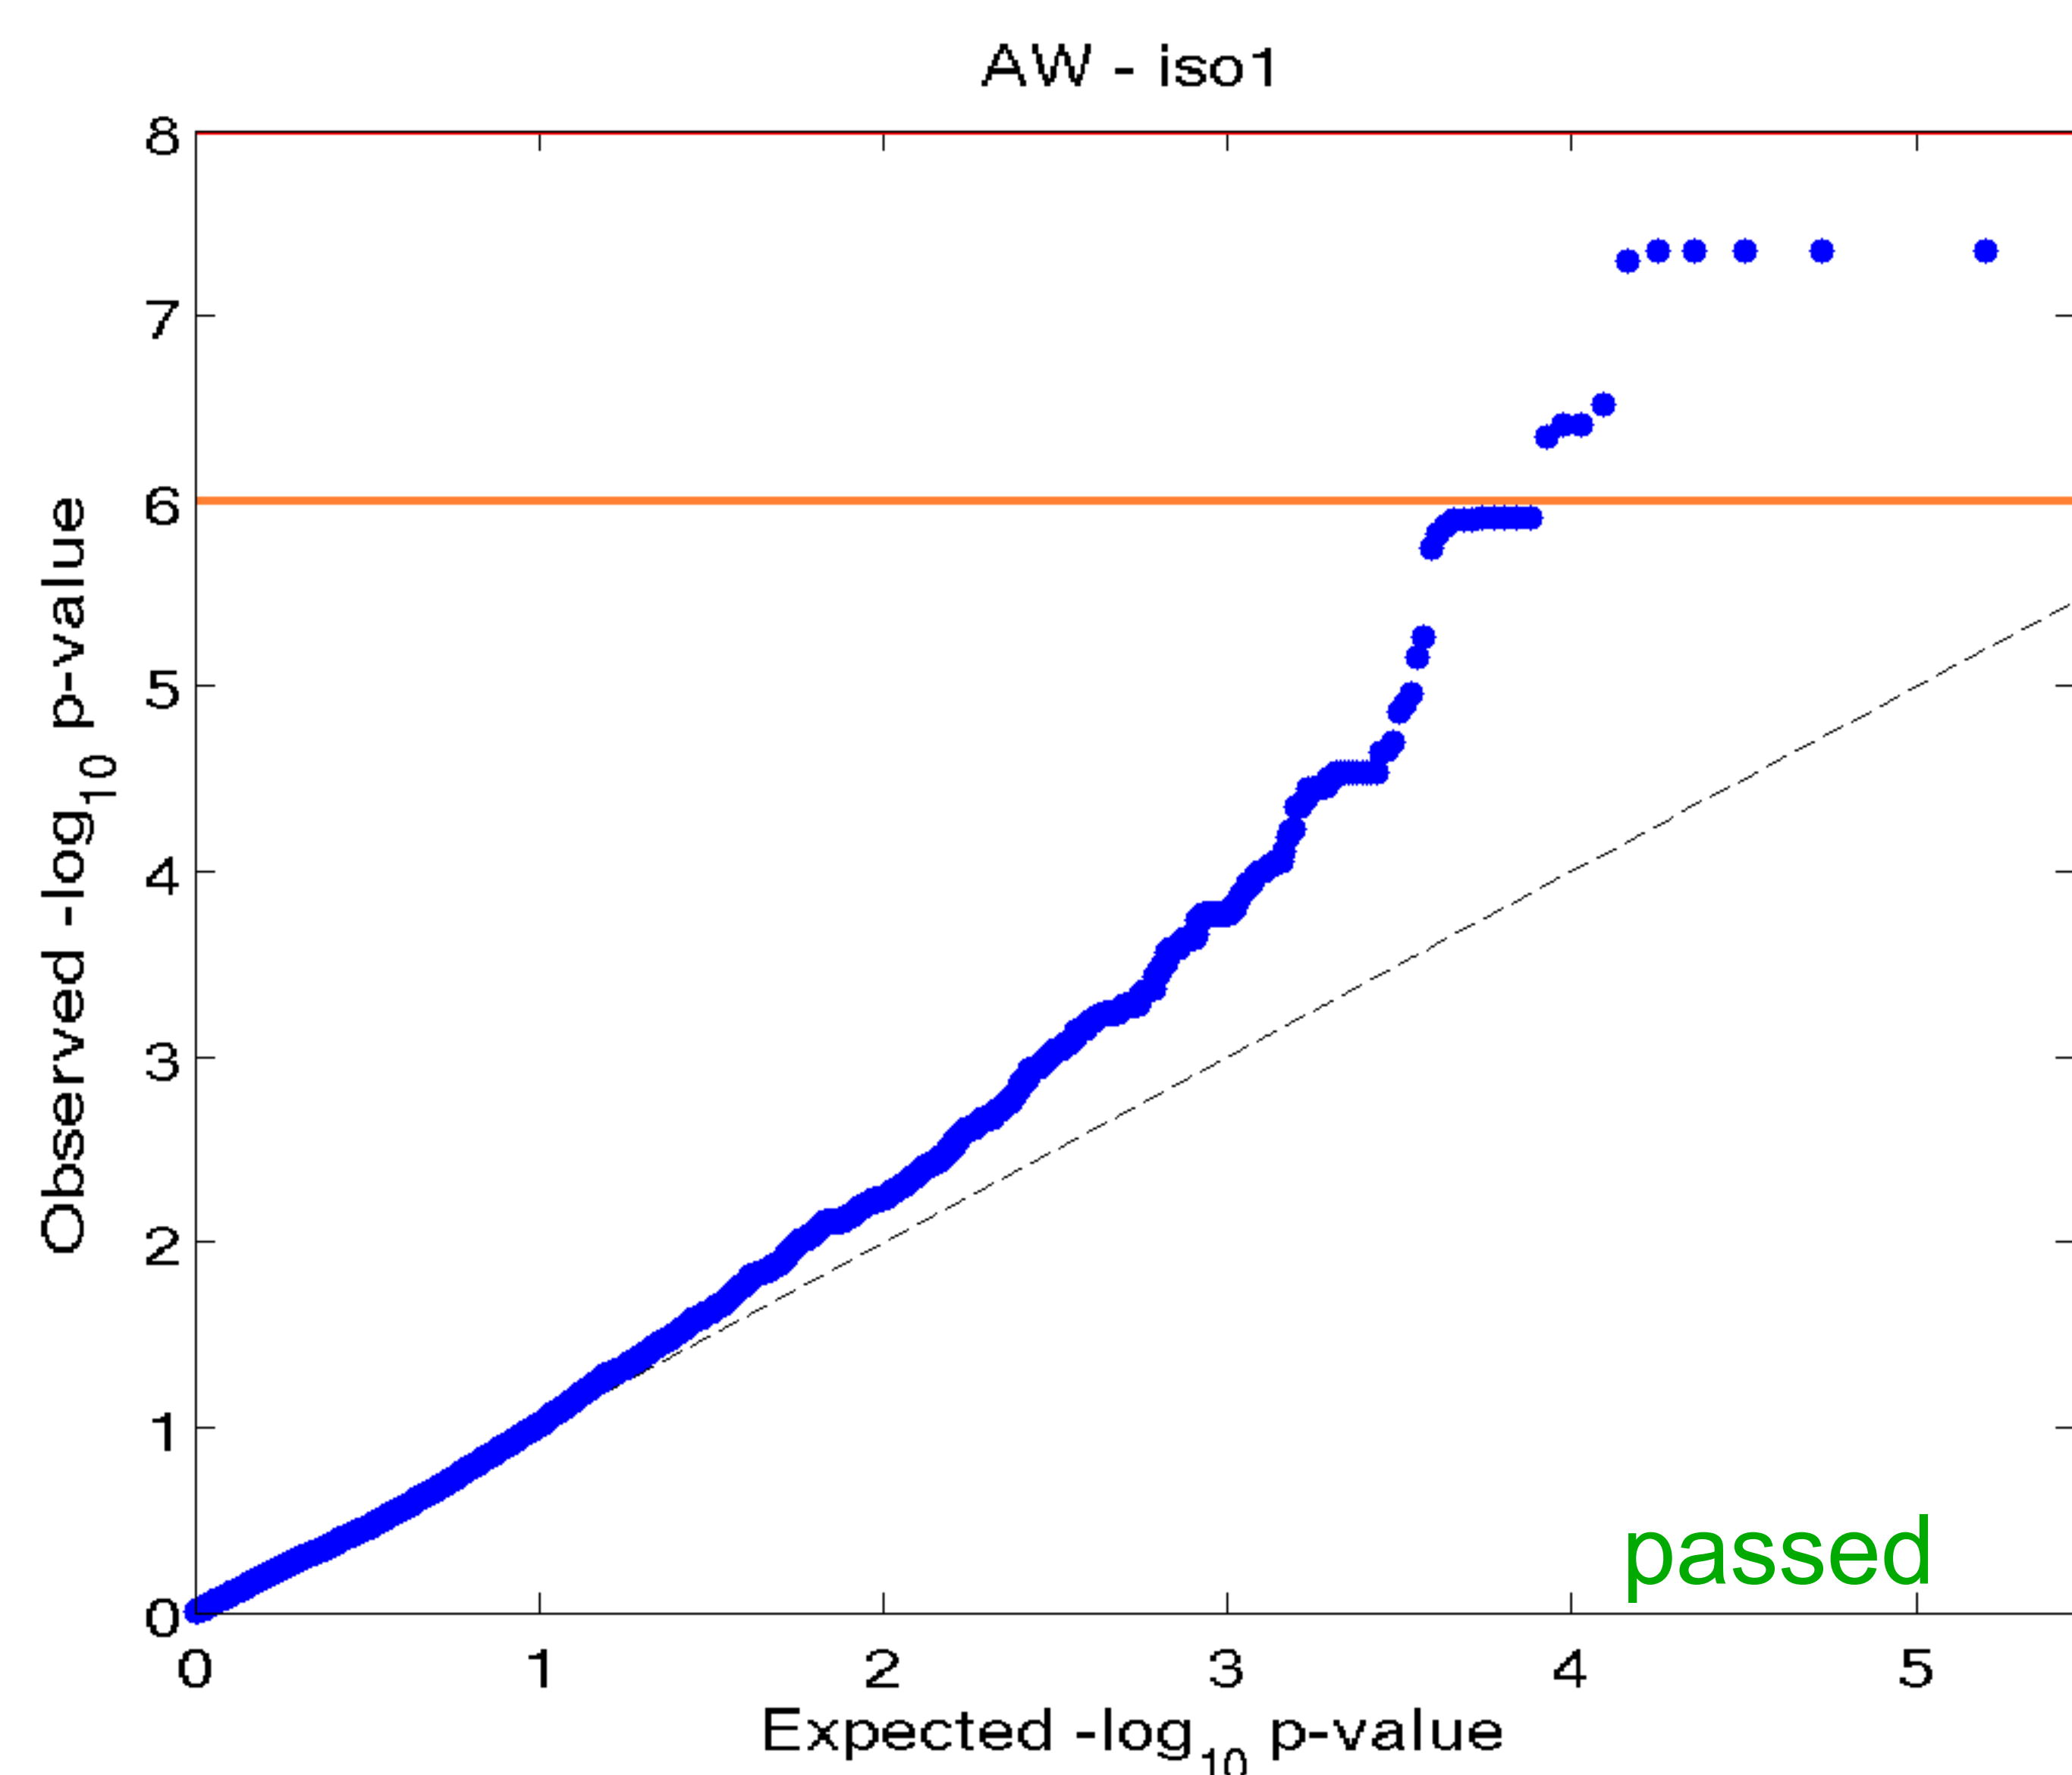

BWE/BWS - iso1

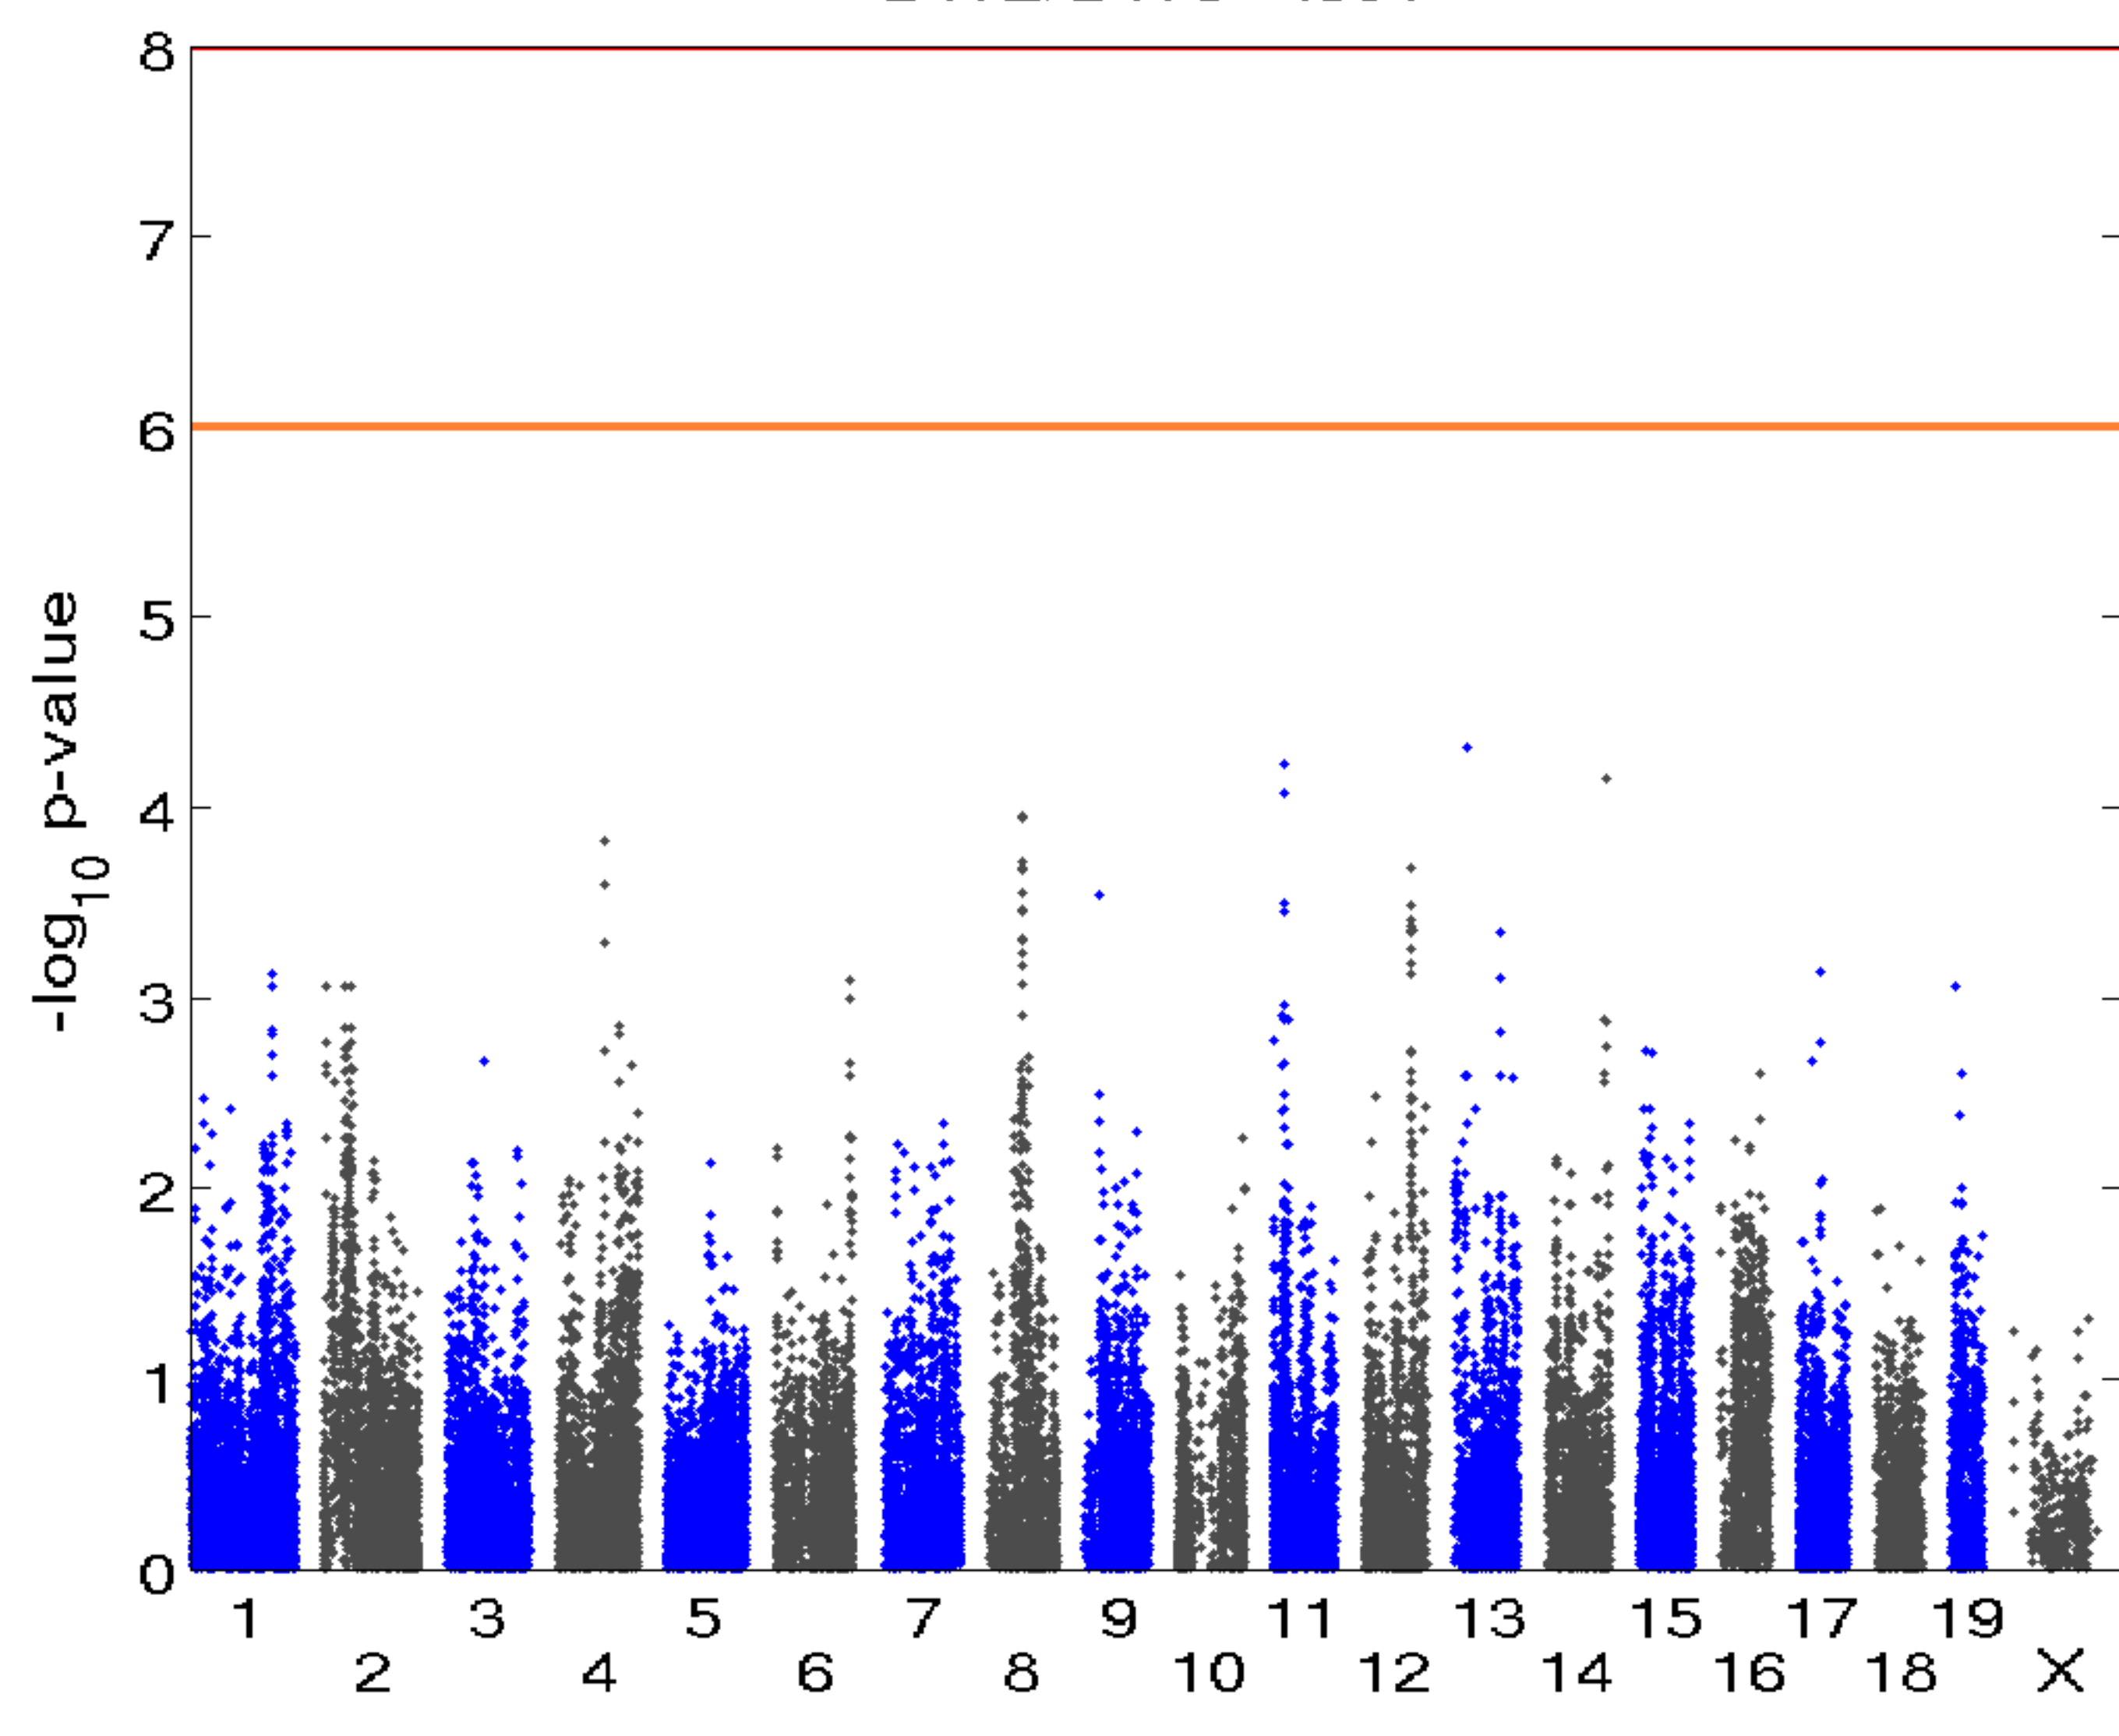

BWE/BWS - iso1

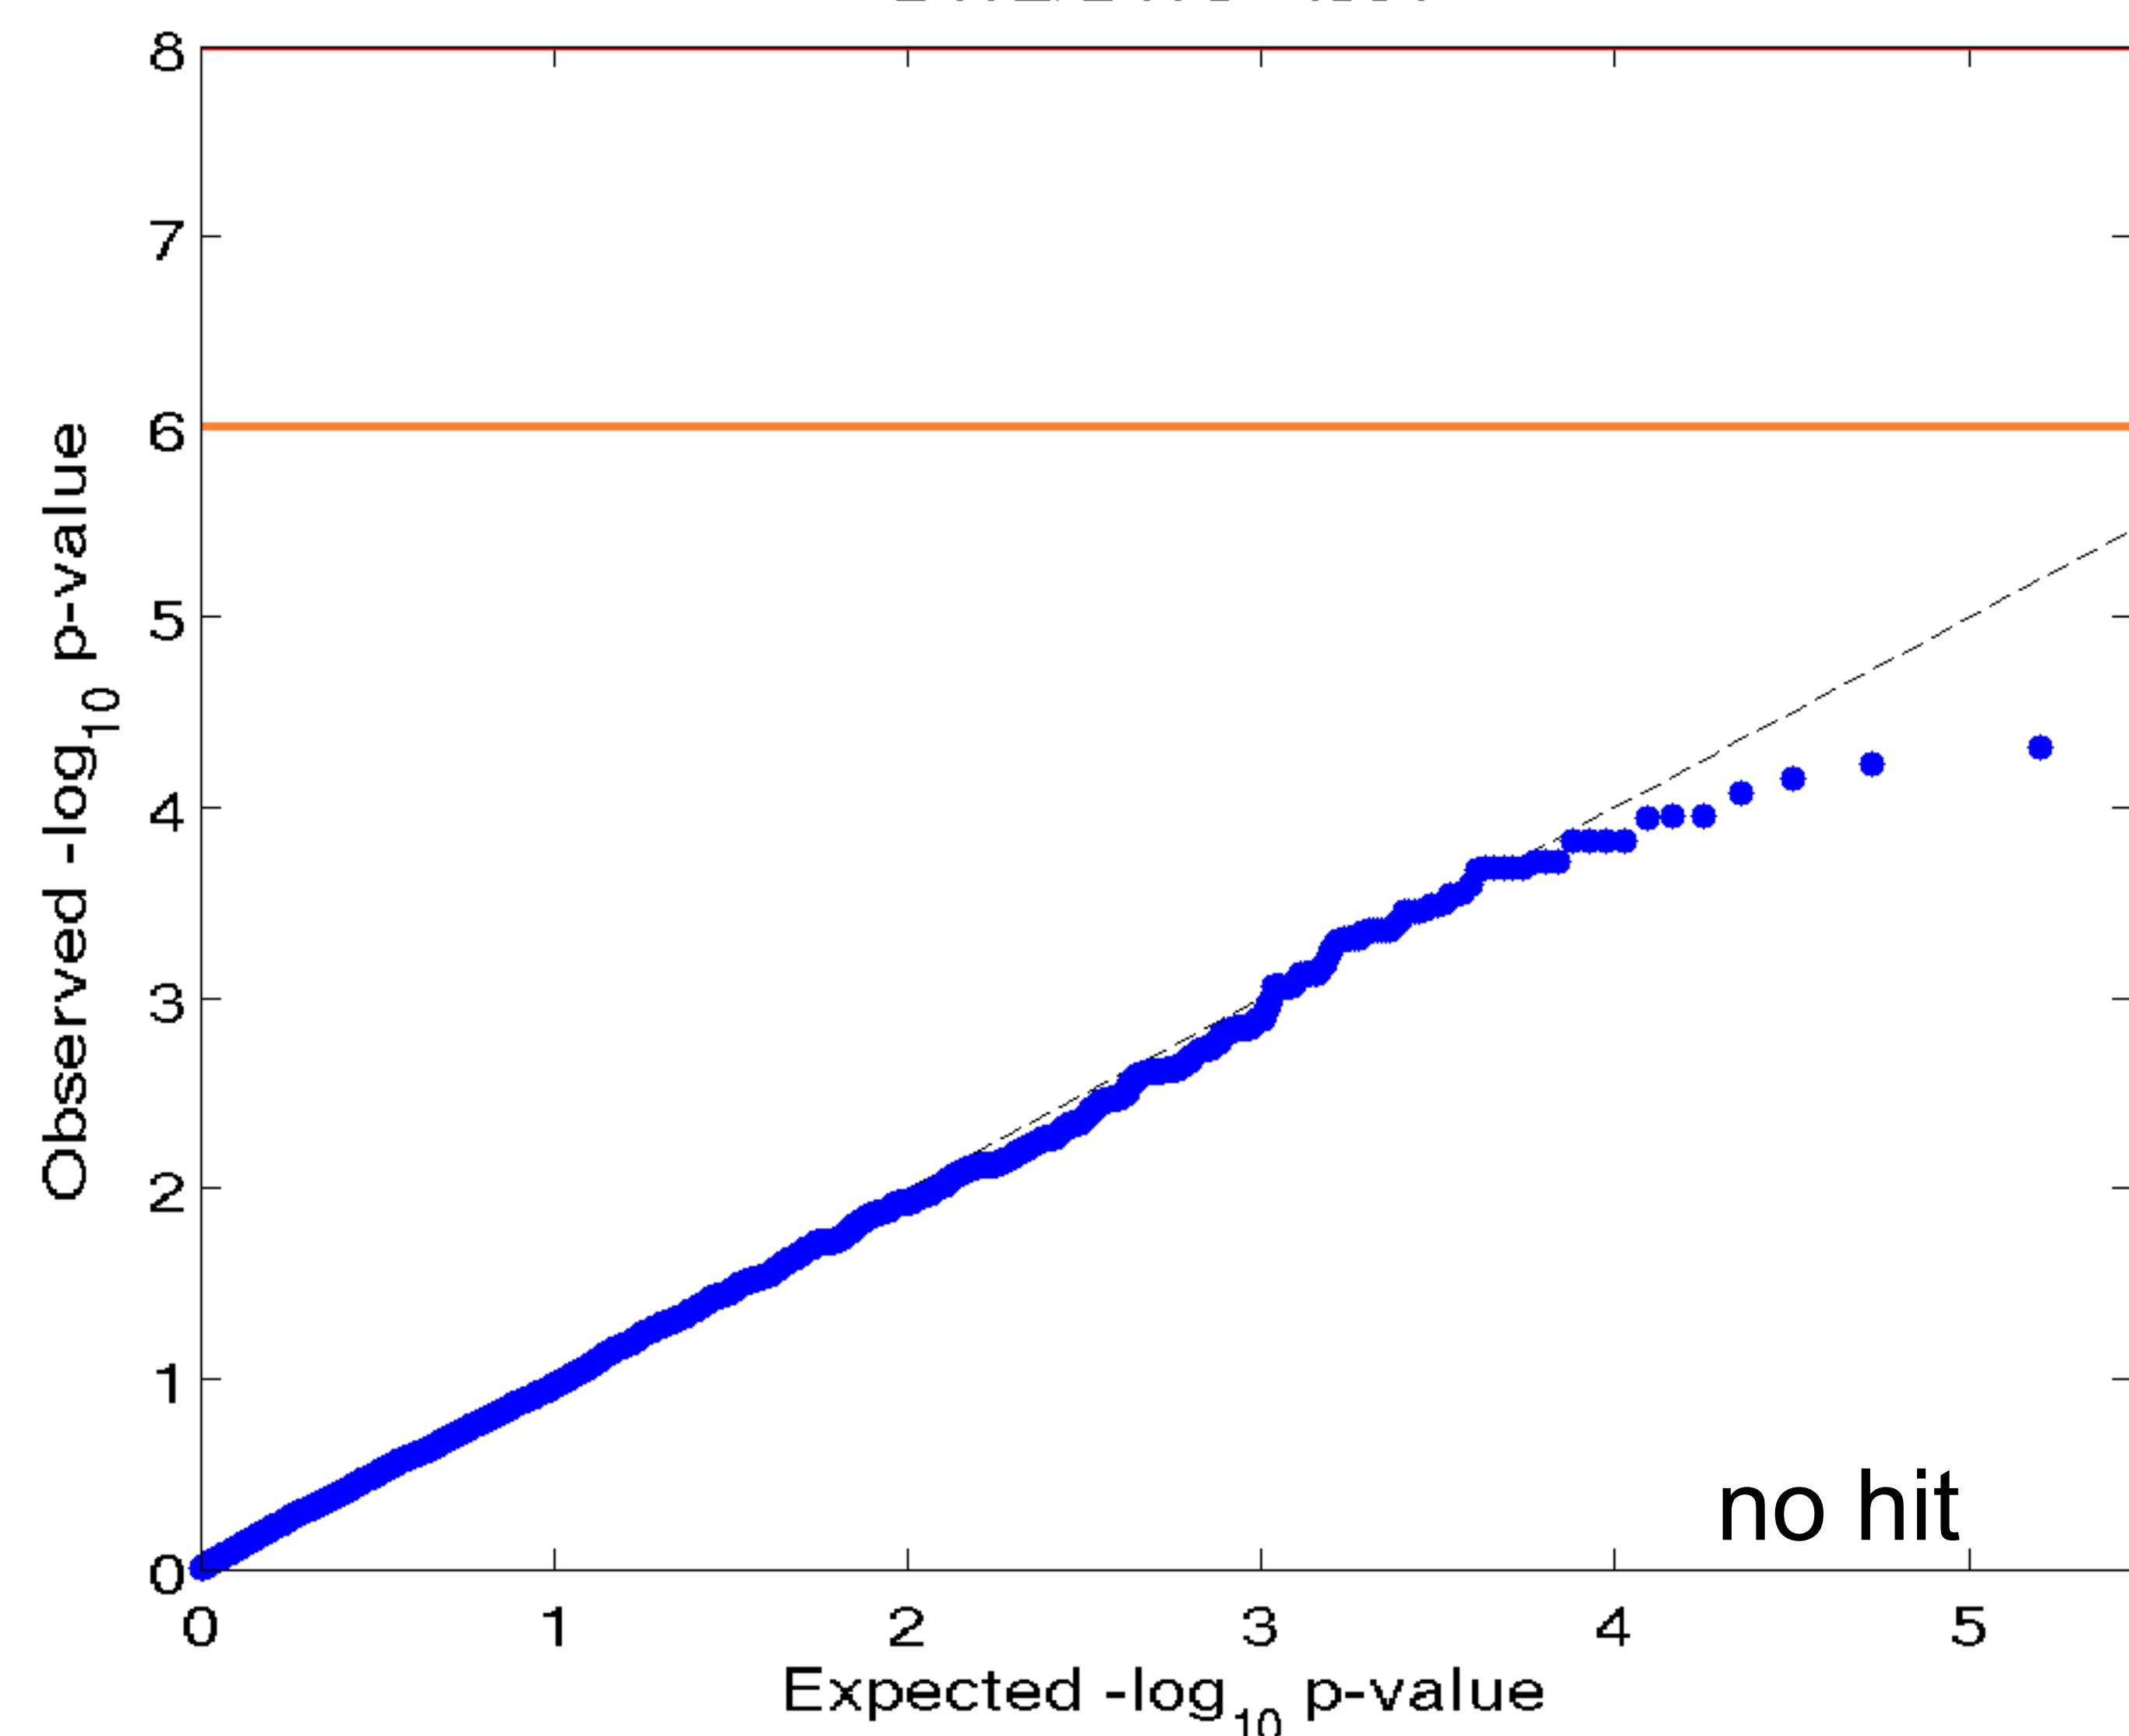



BWE - iso1

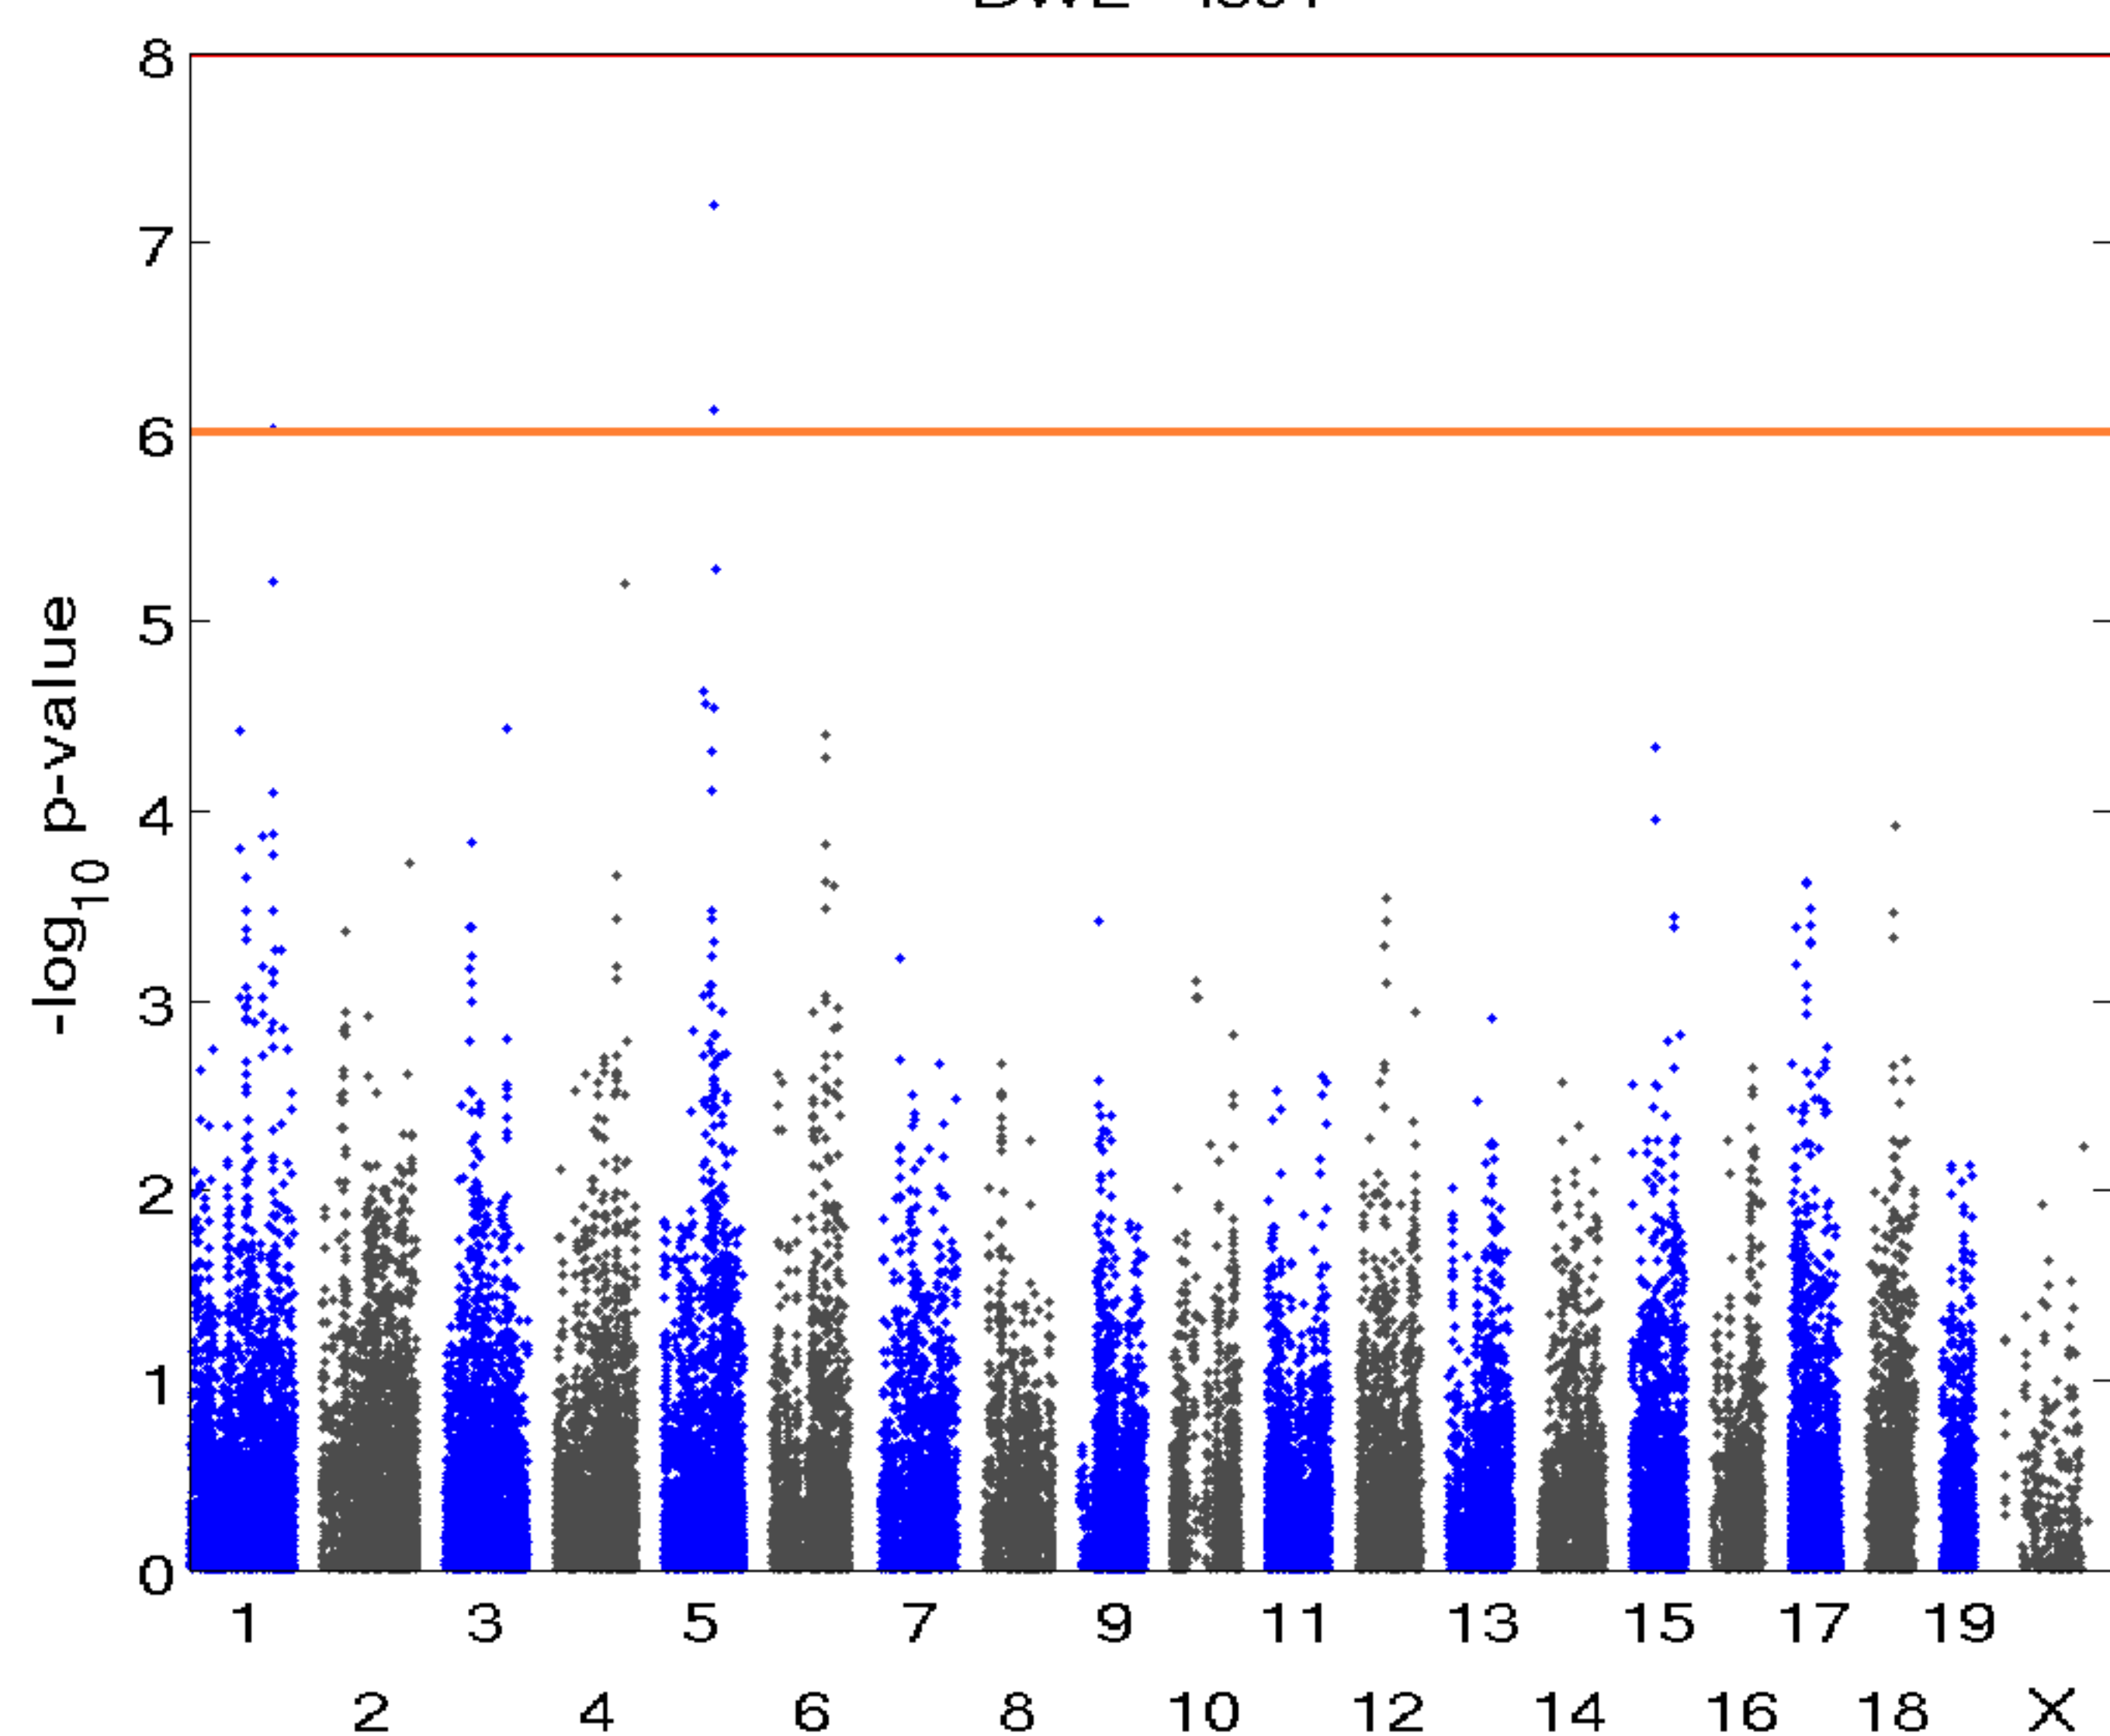

BWE - iso1

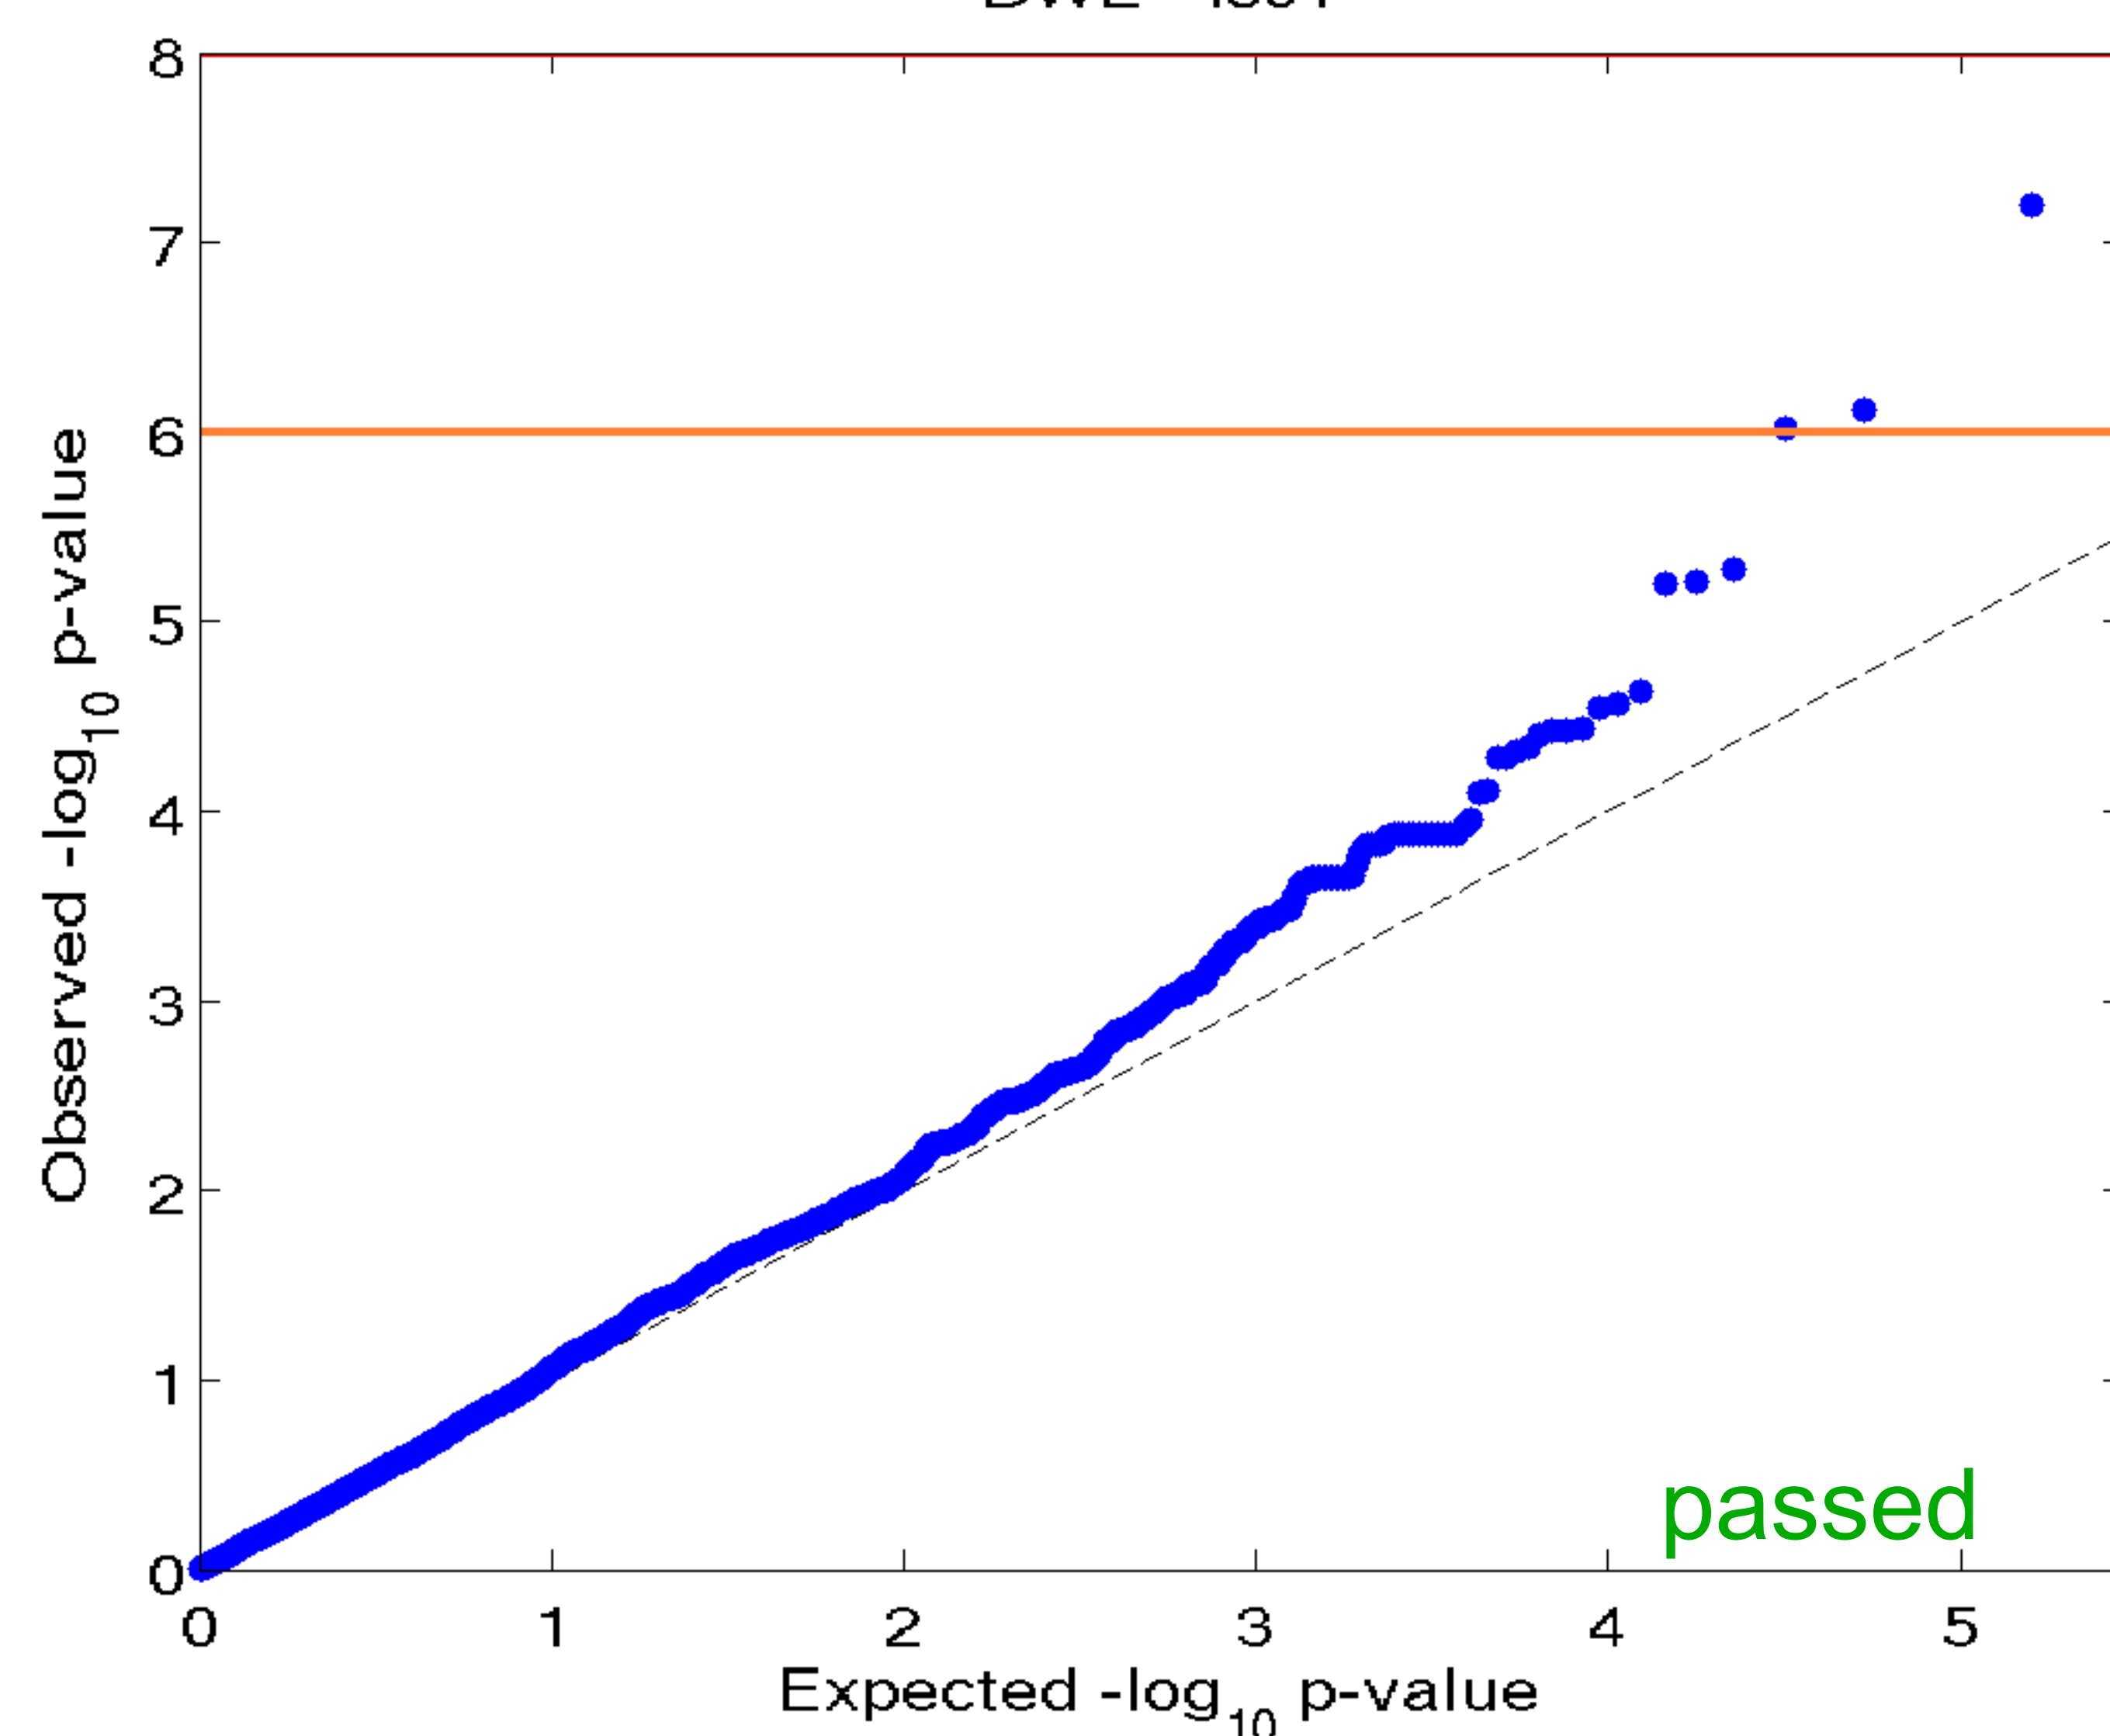

HR-ECG - iso1

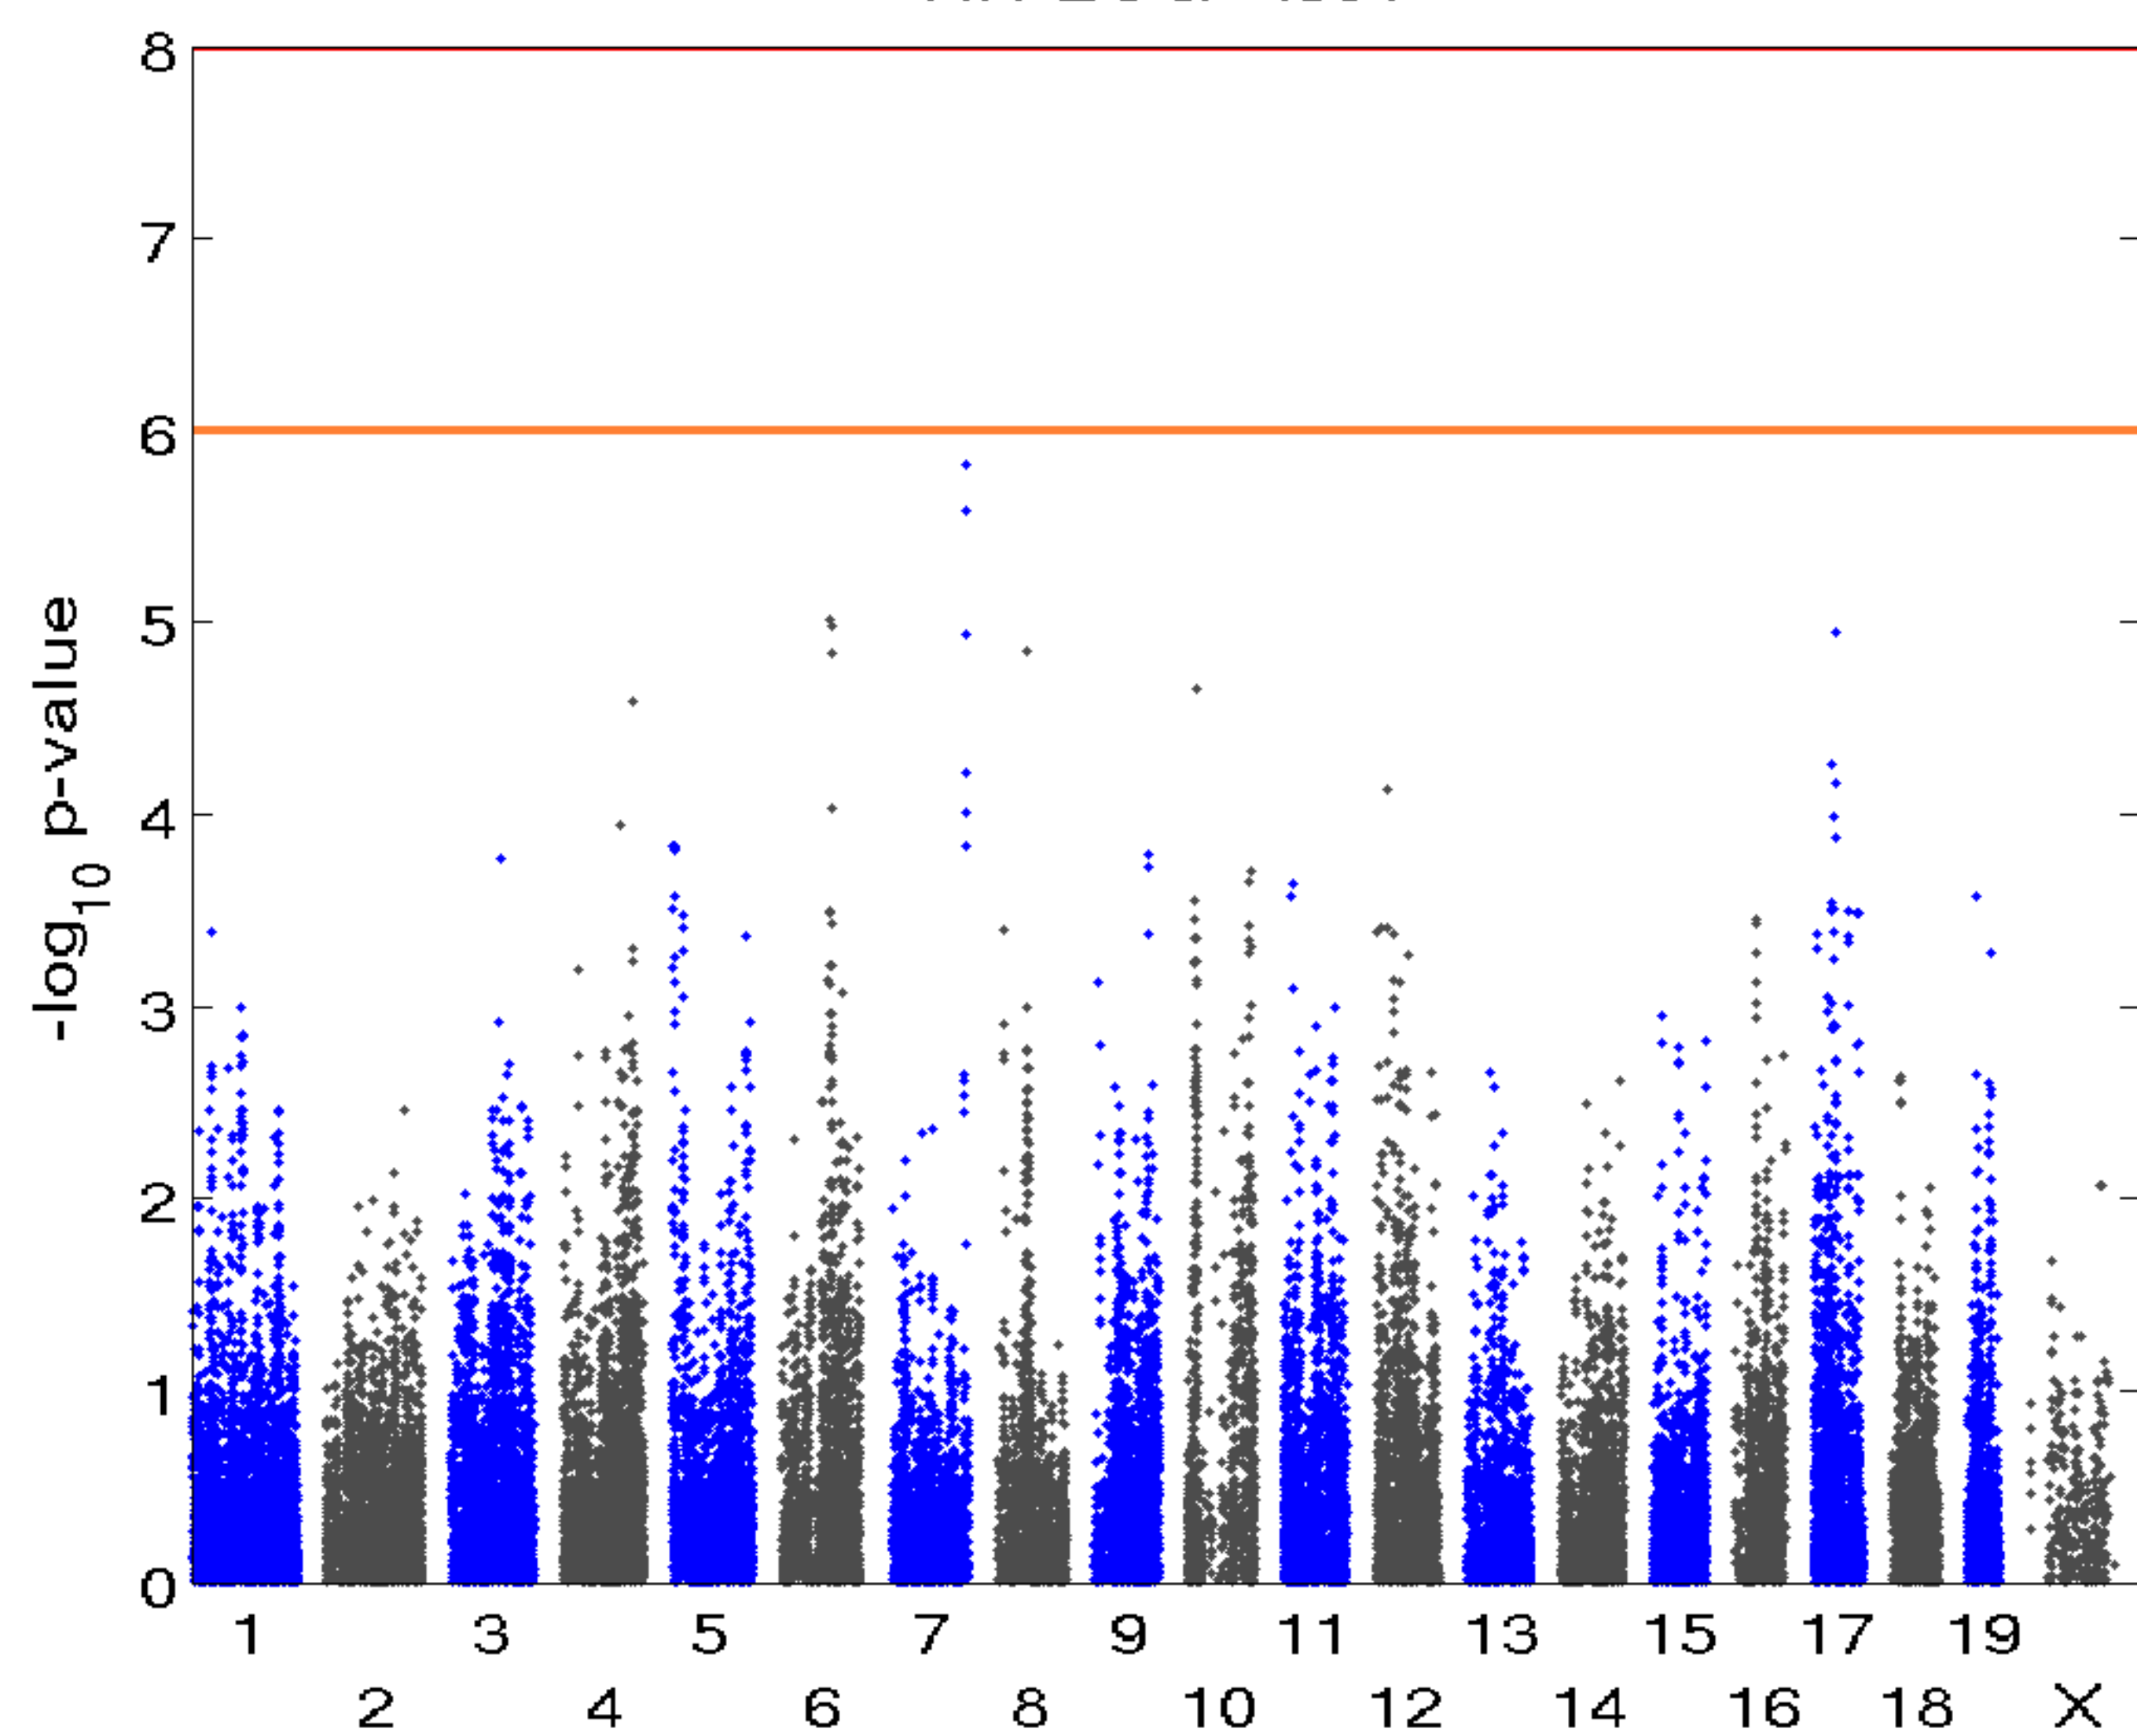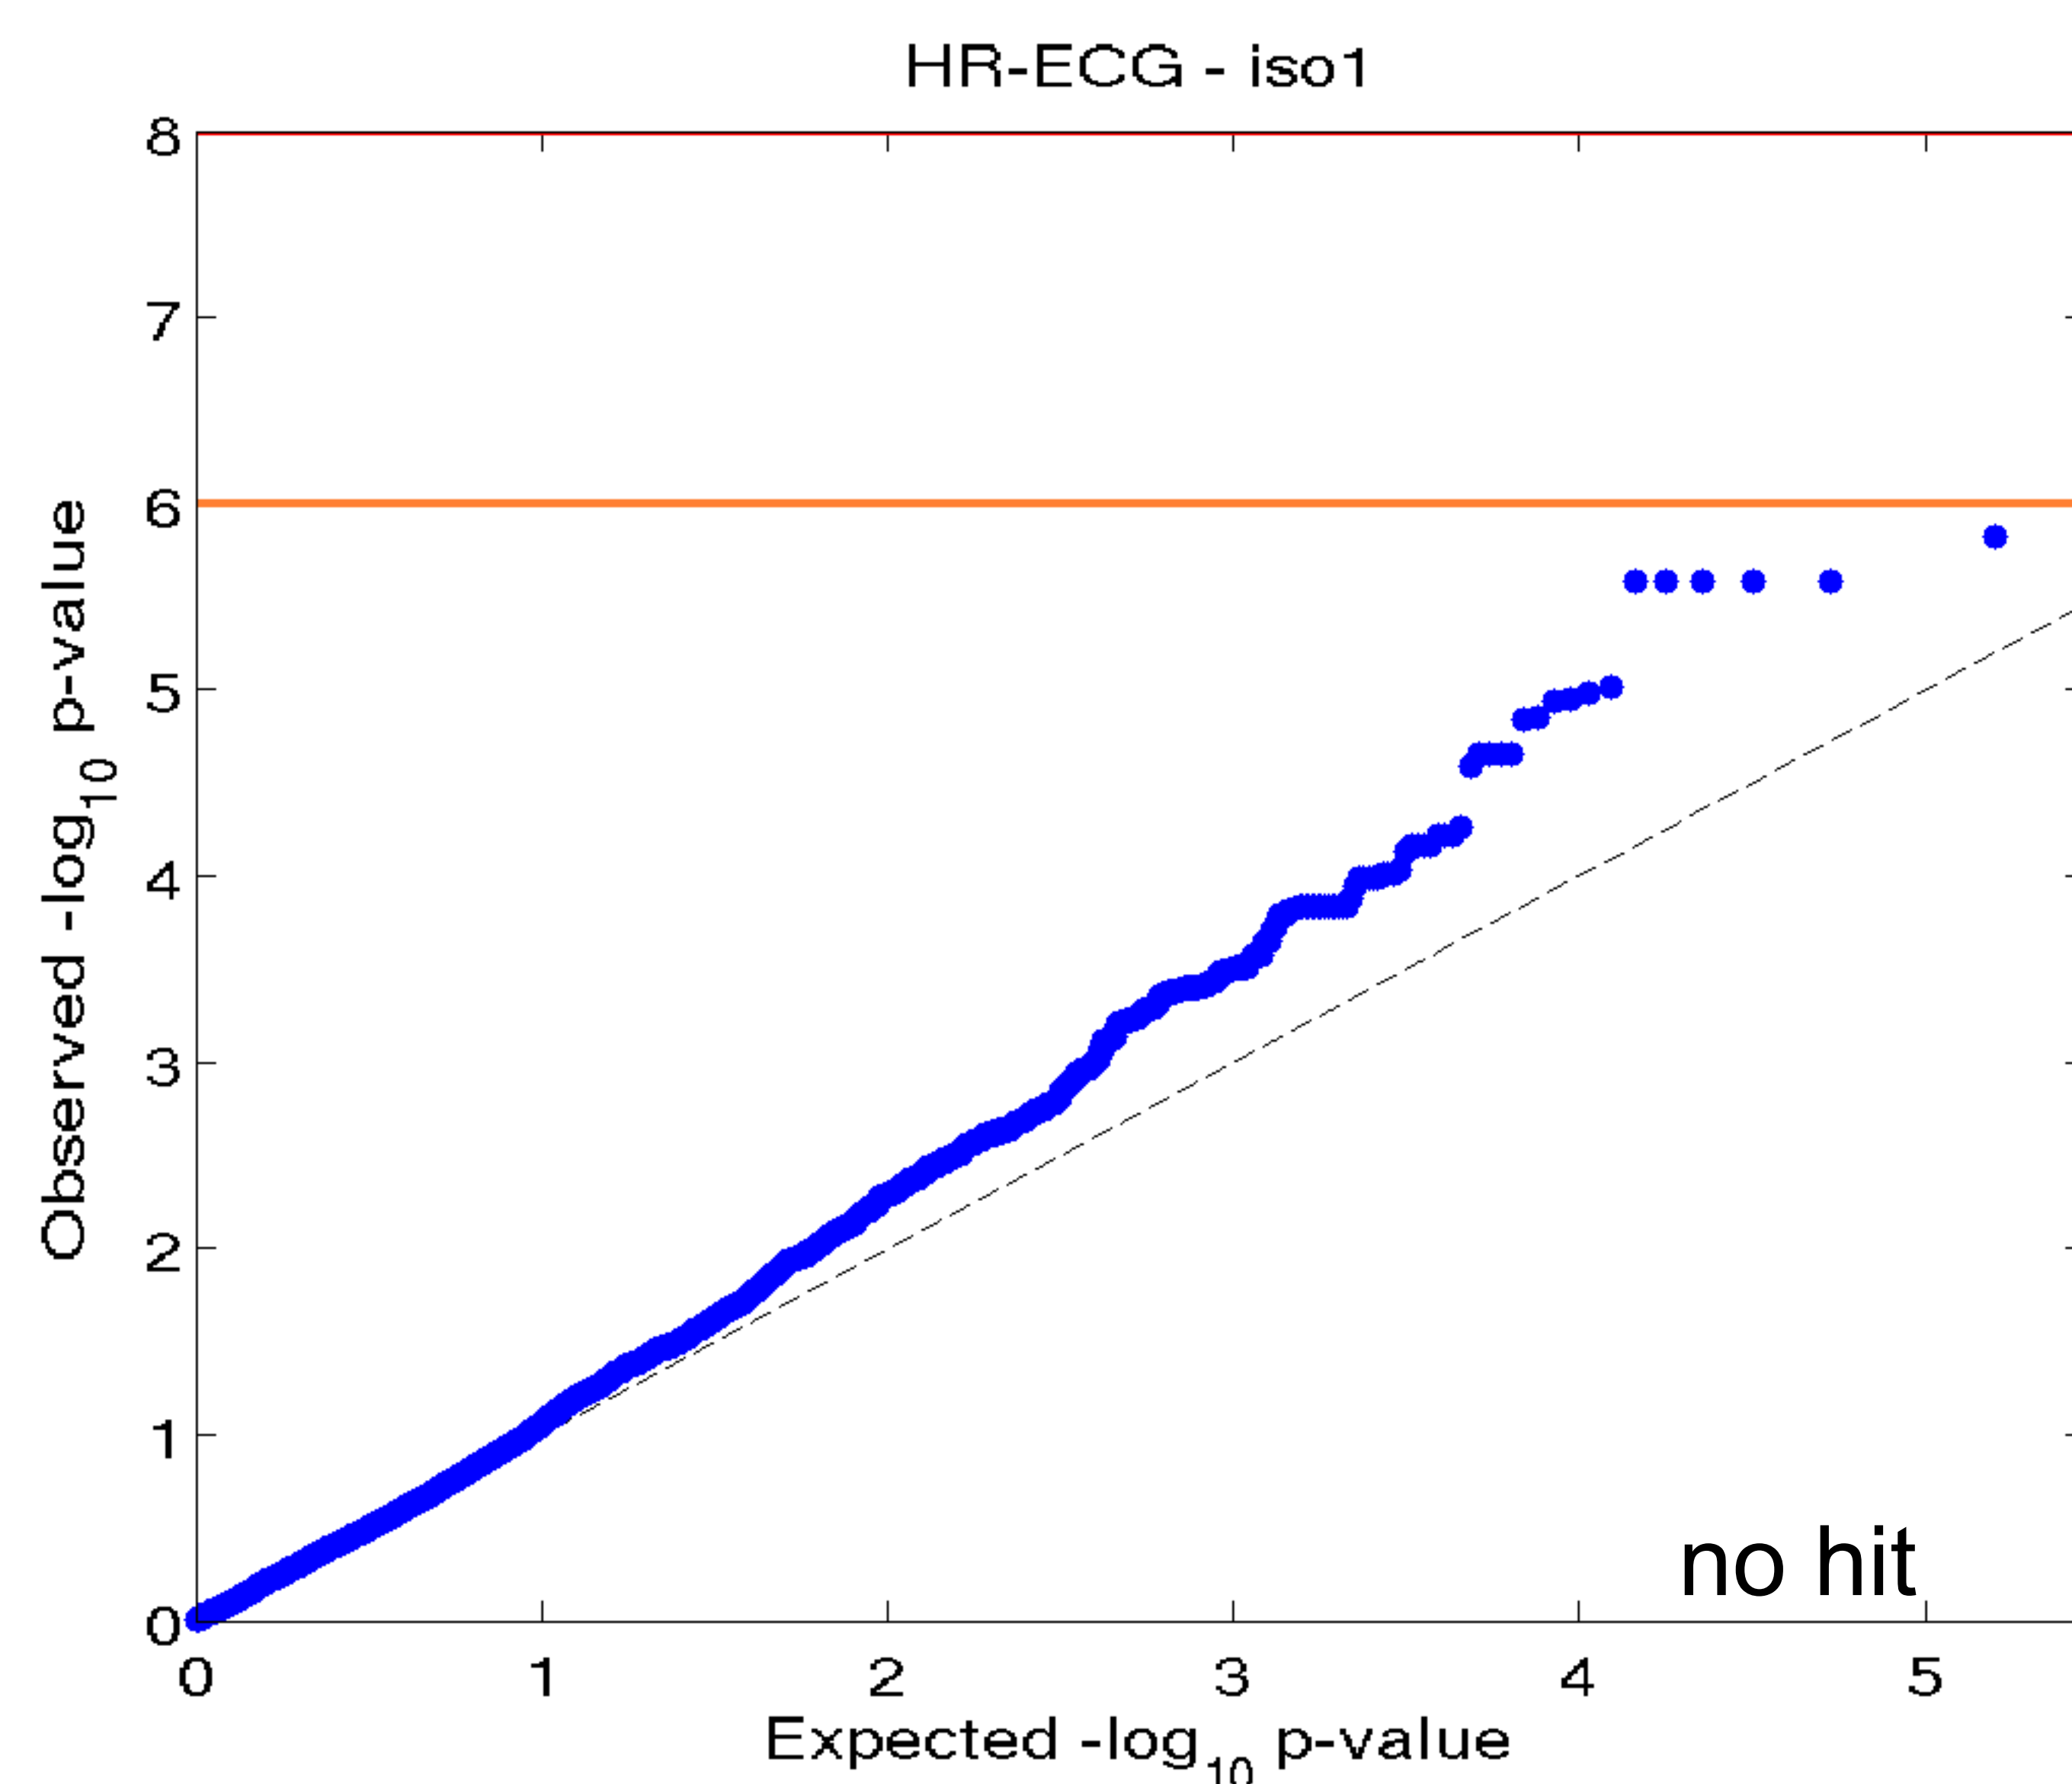

HR-TC - iso1

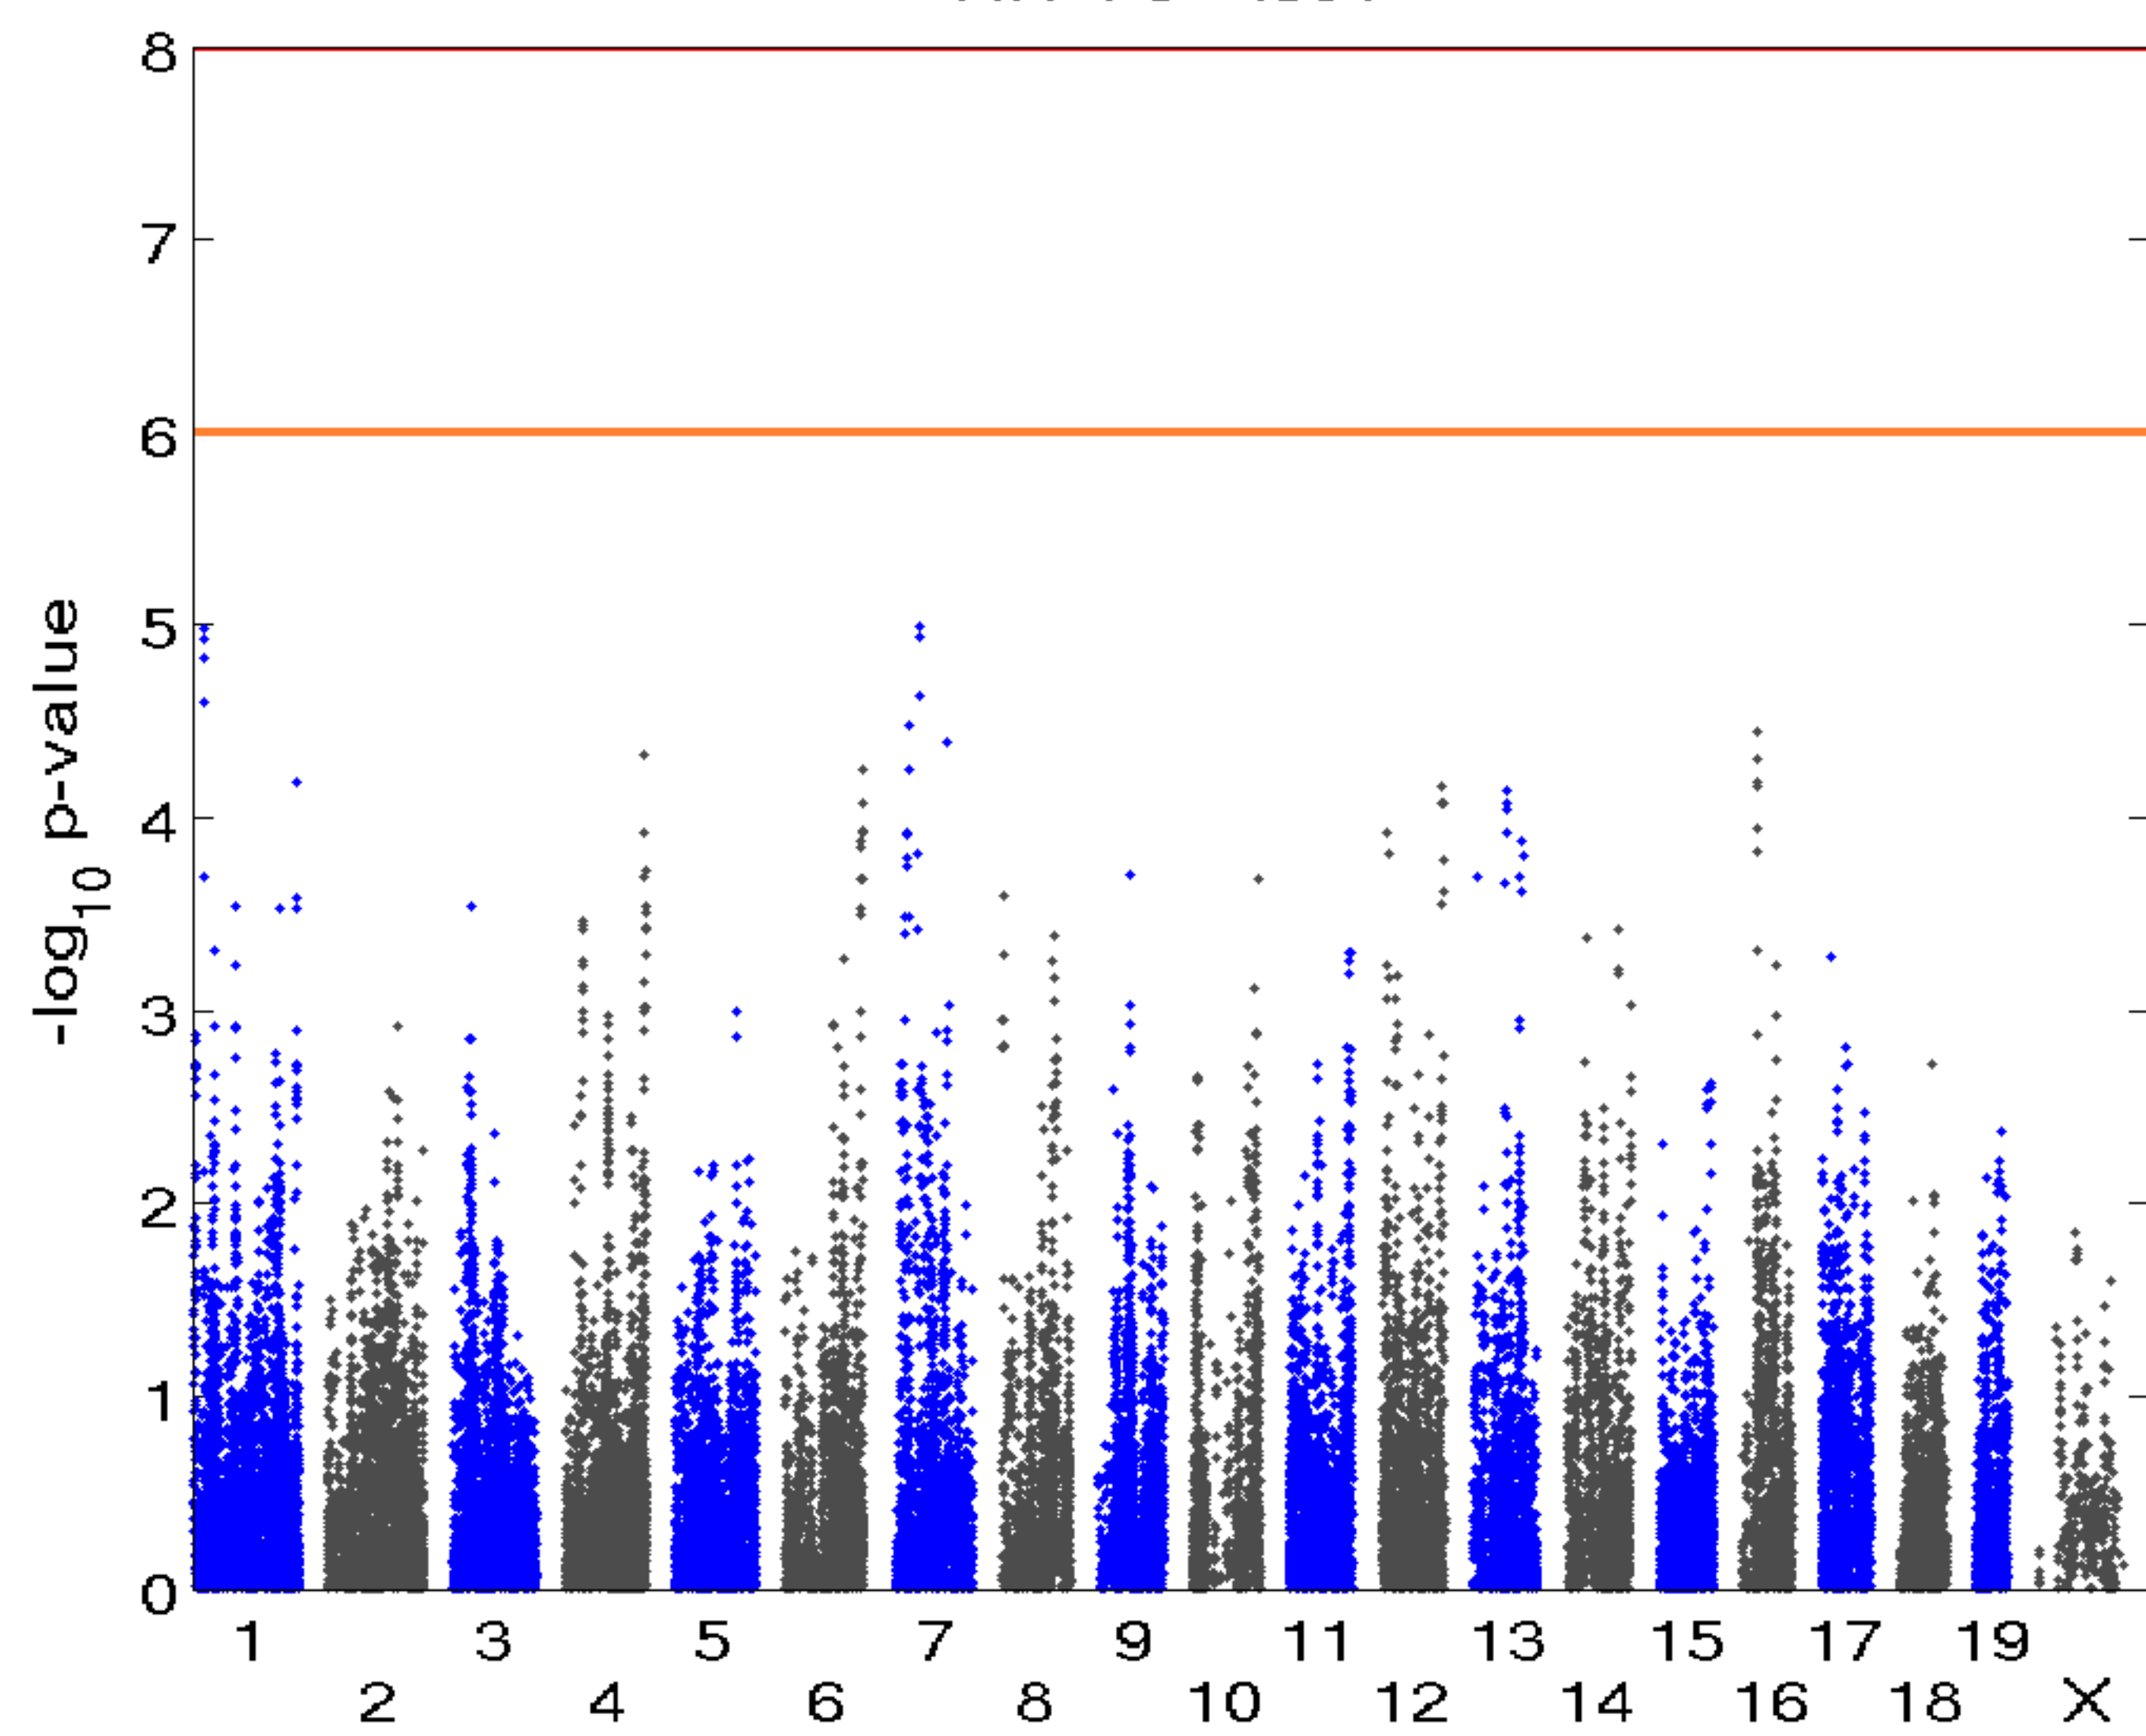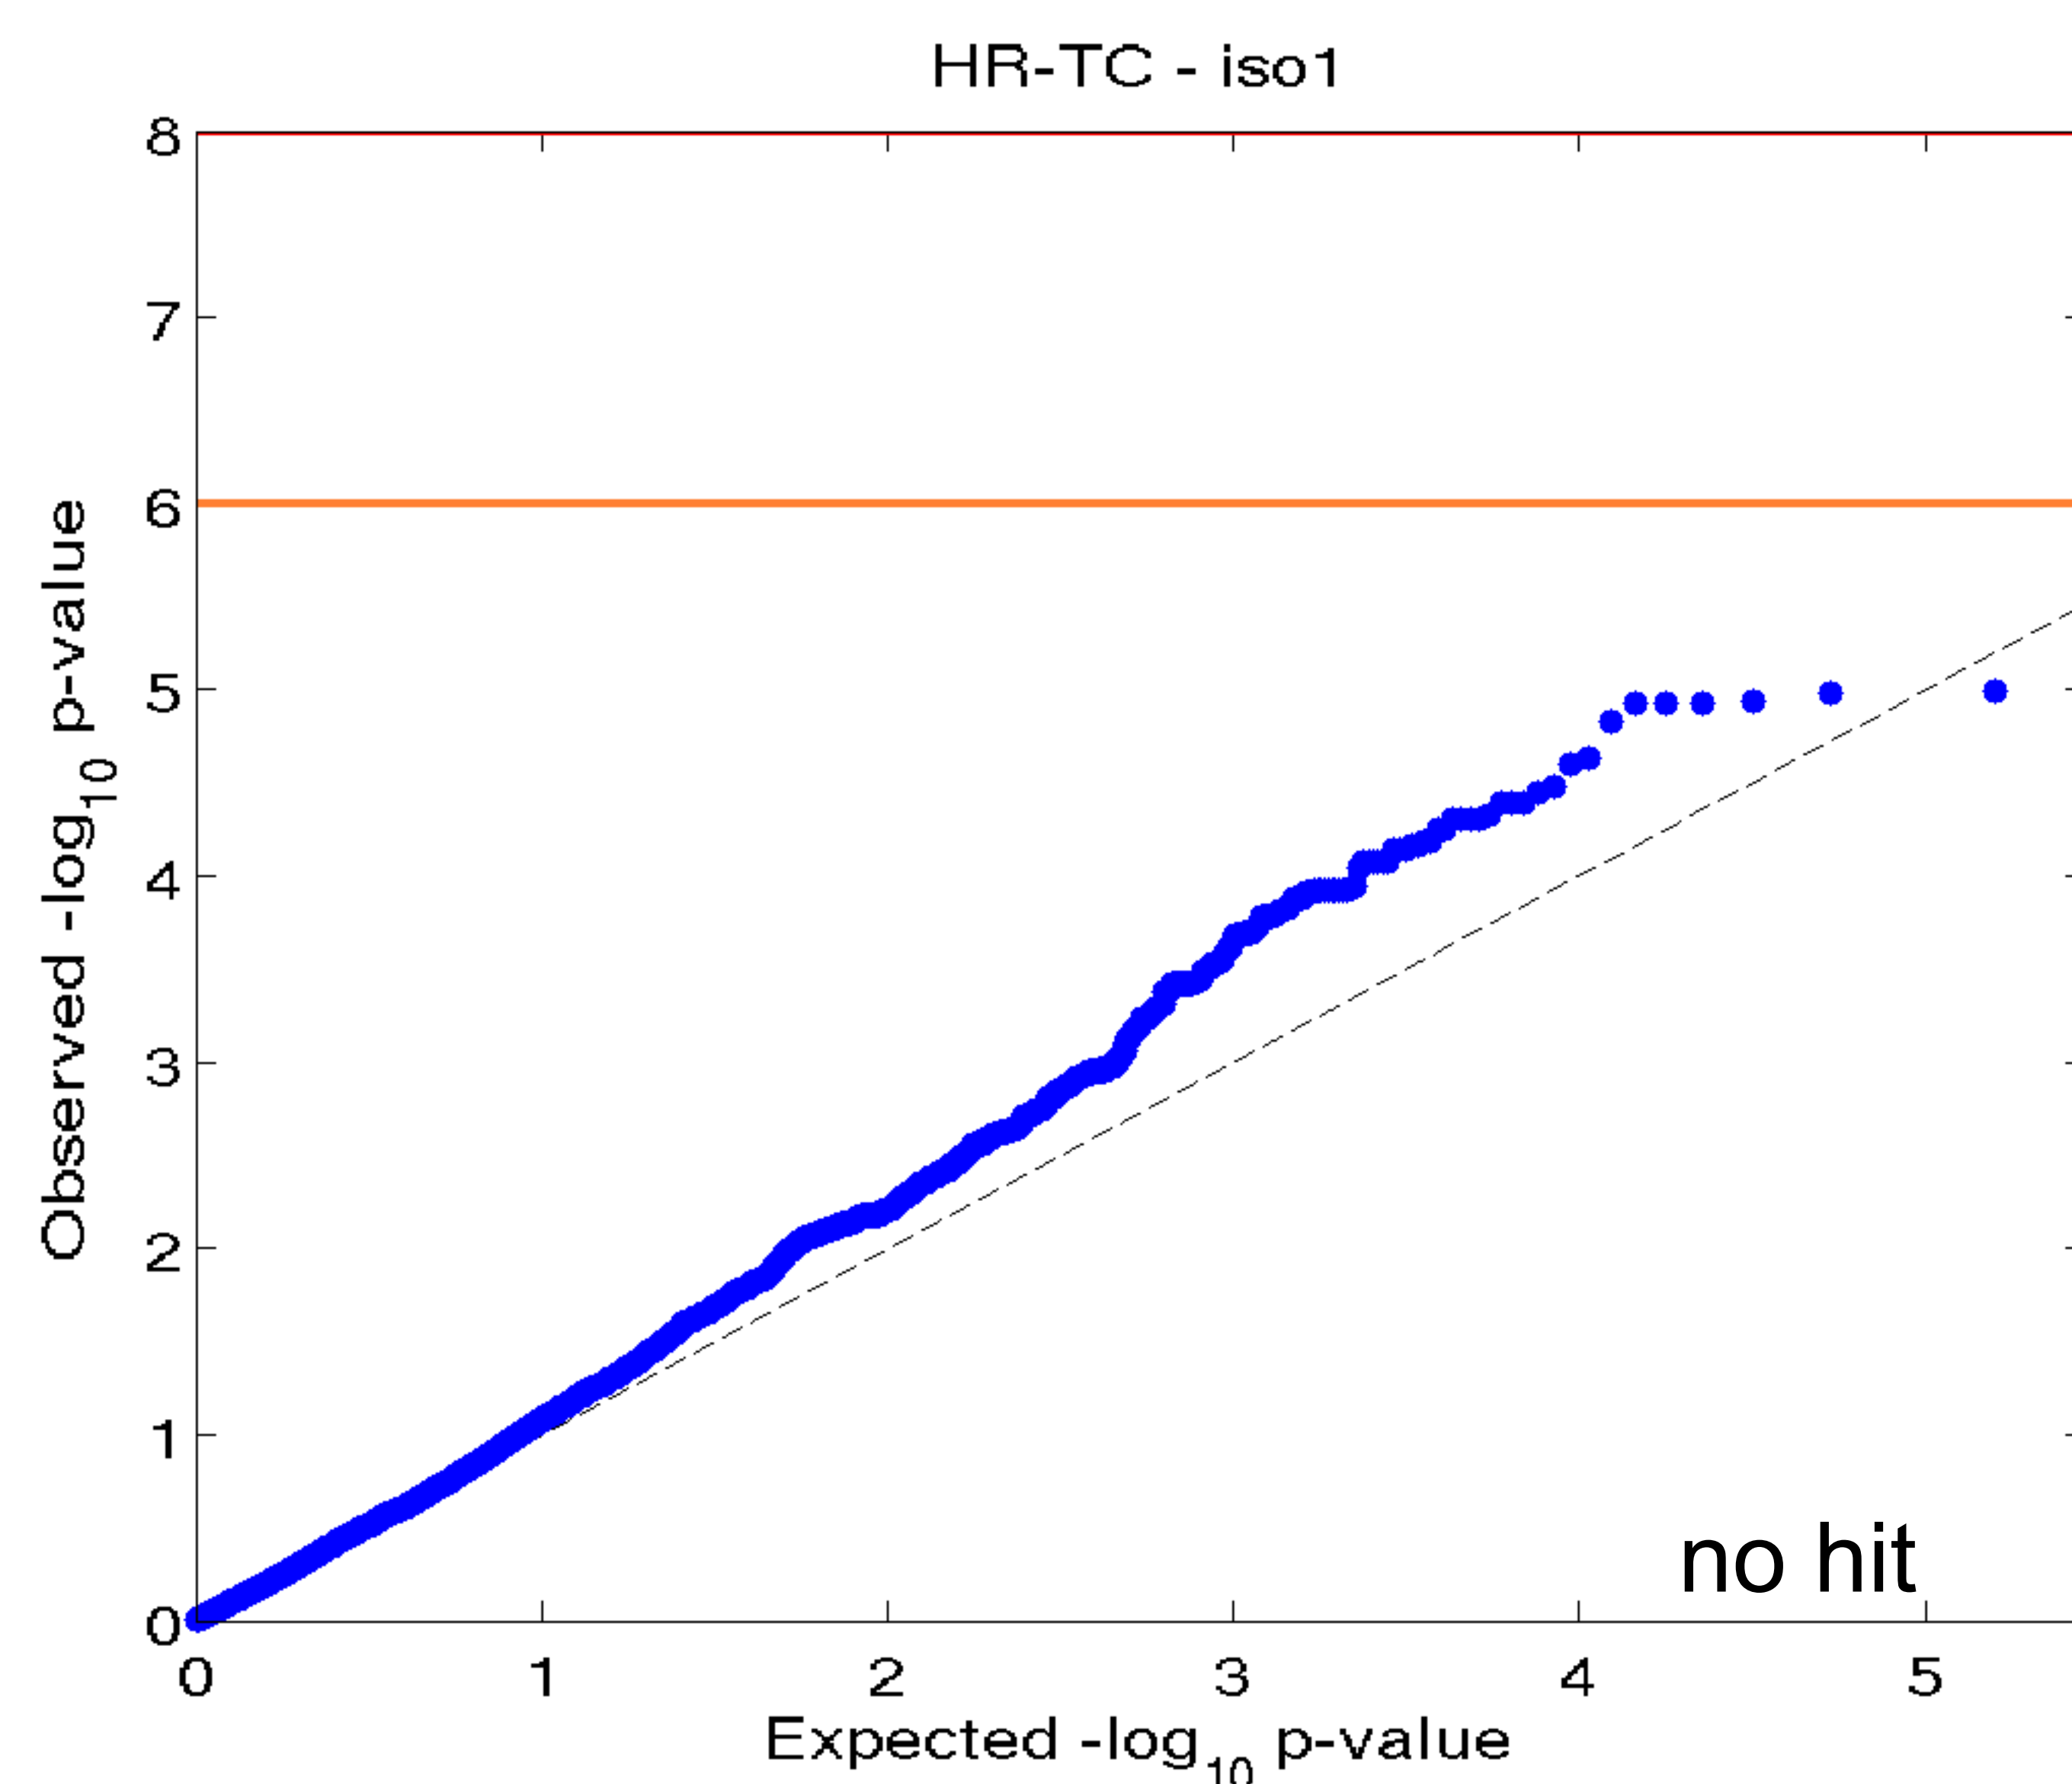

HW - iso1

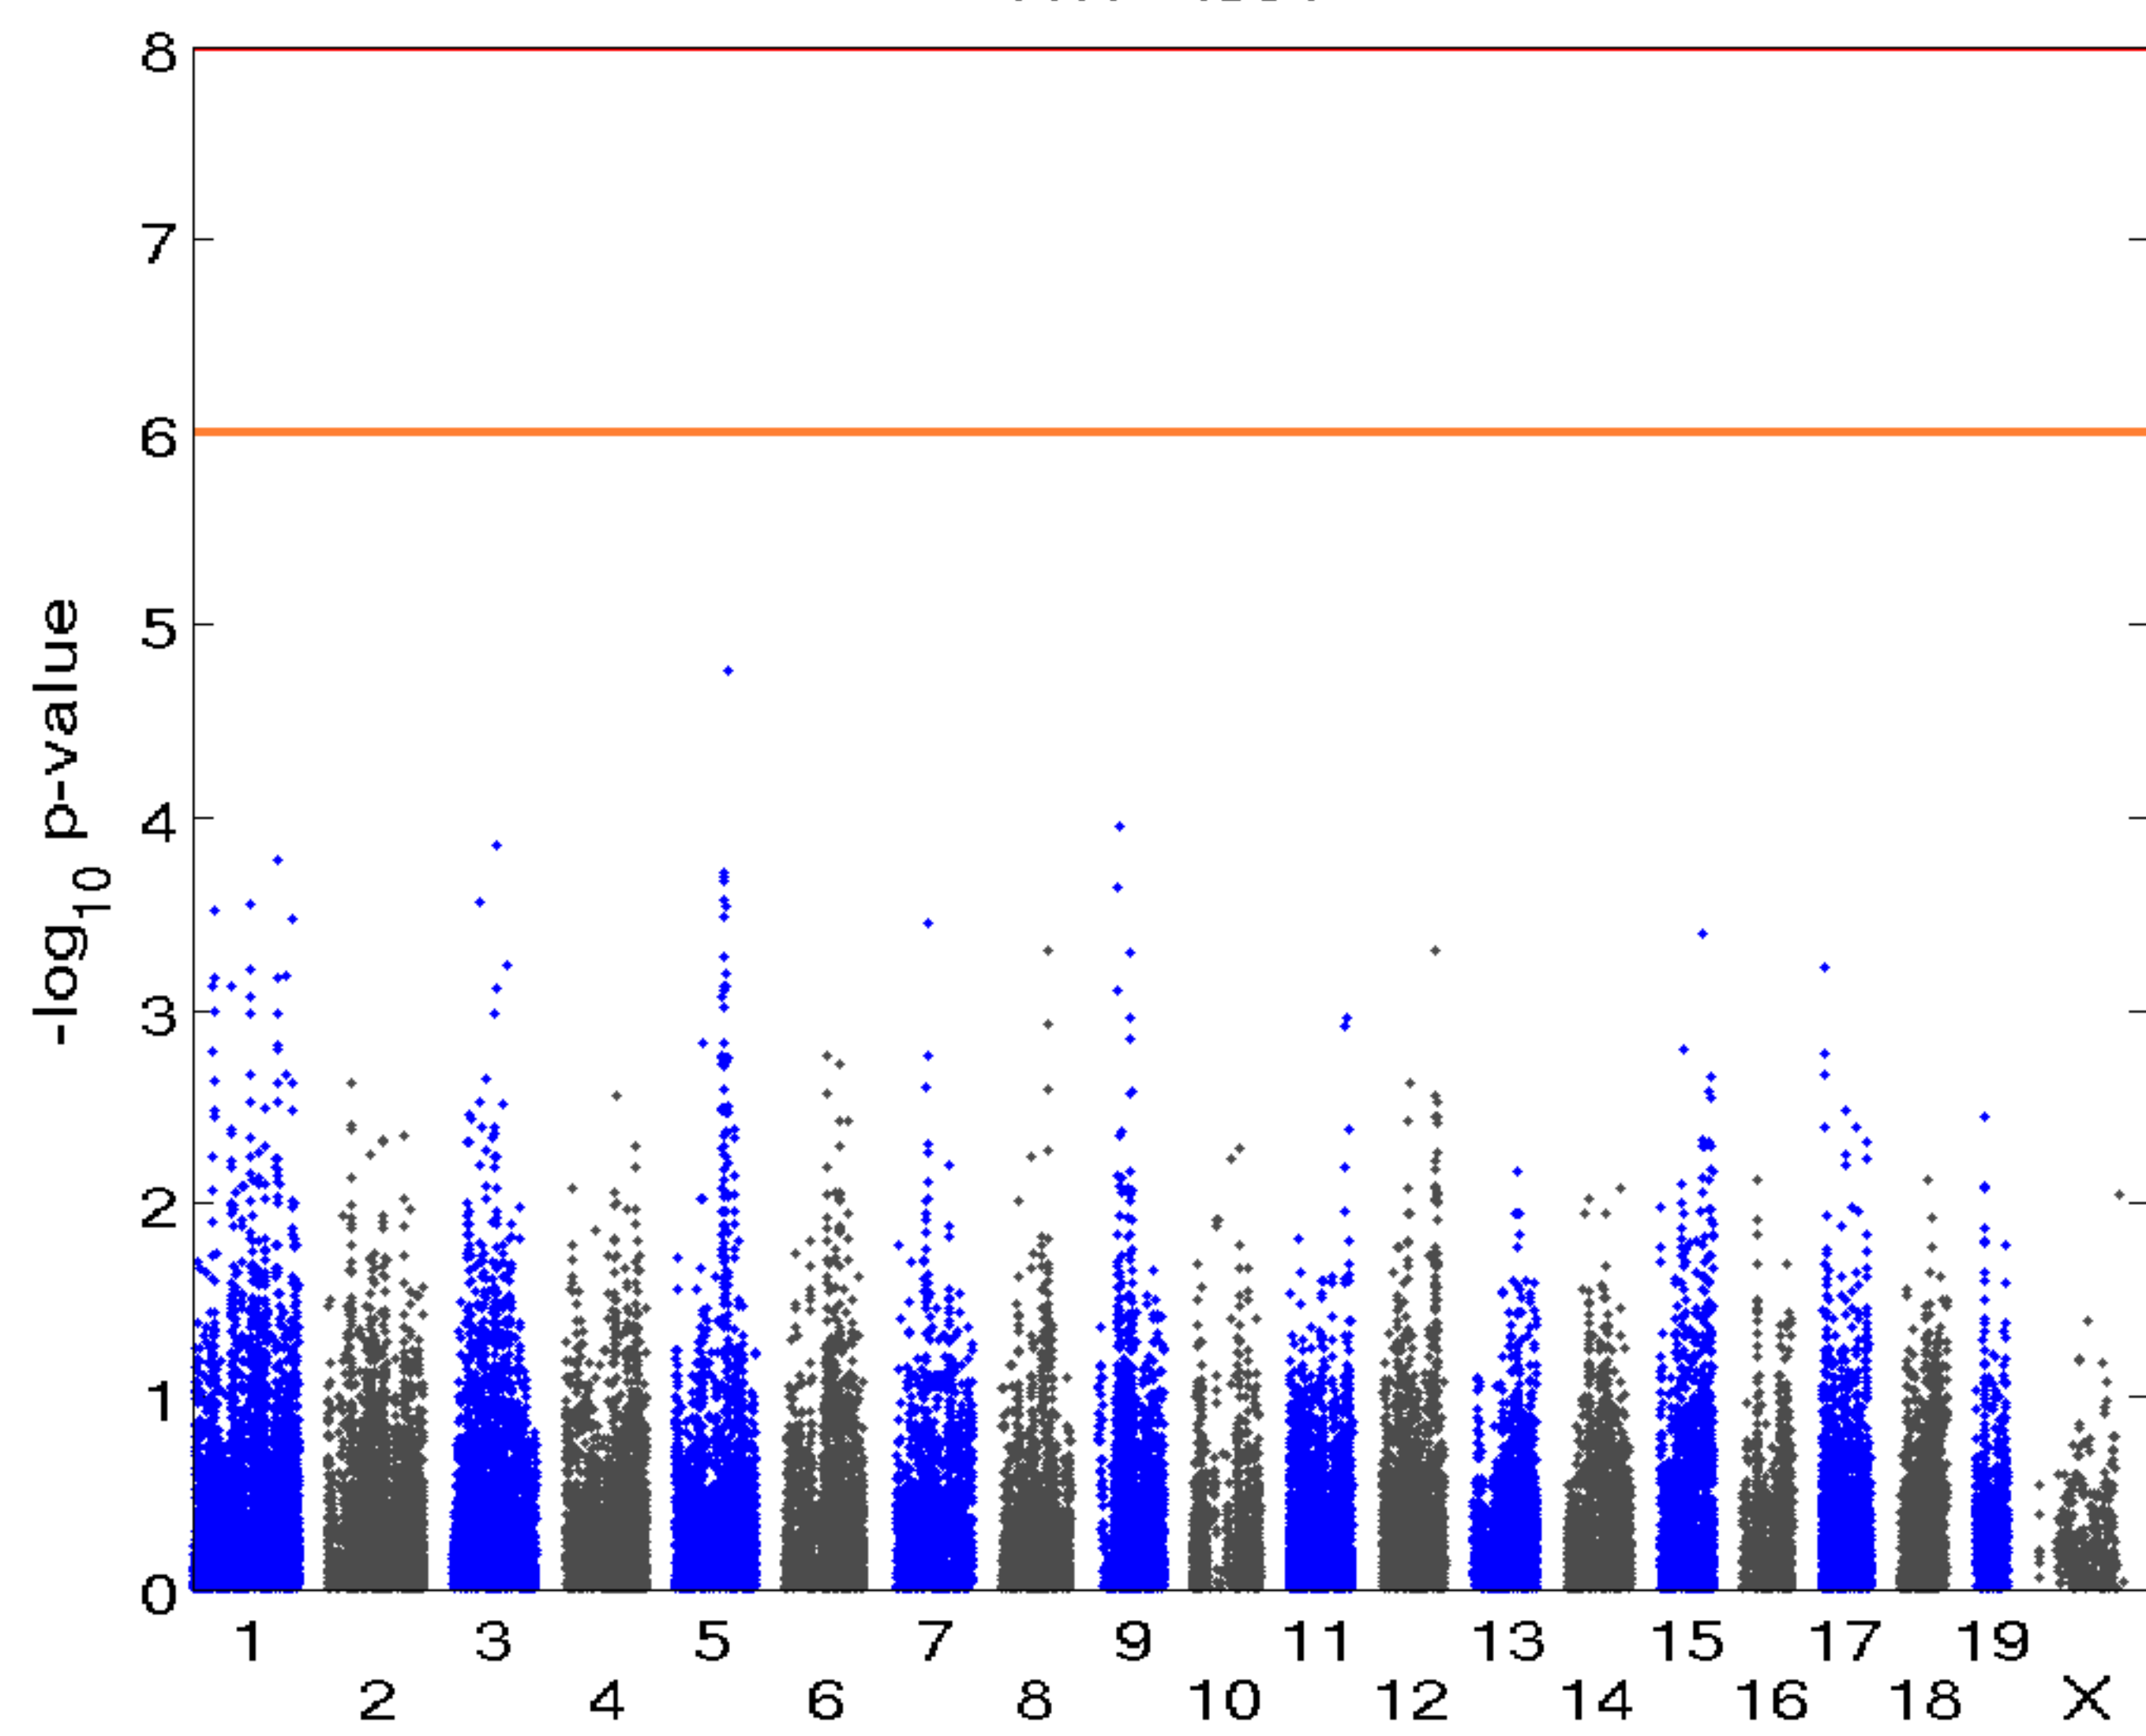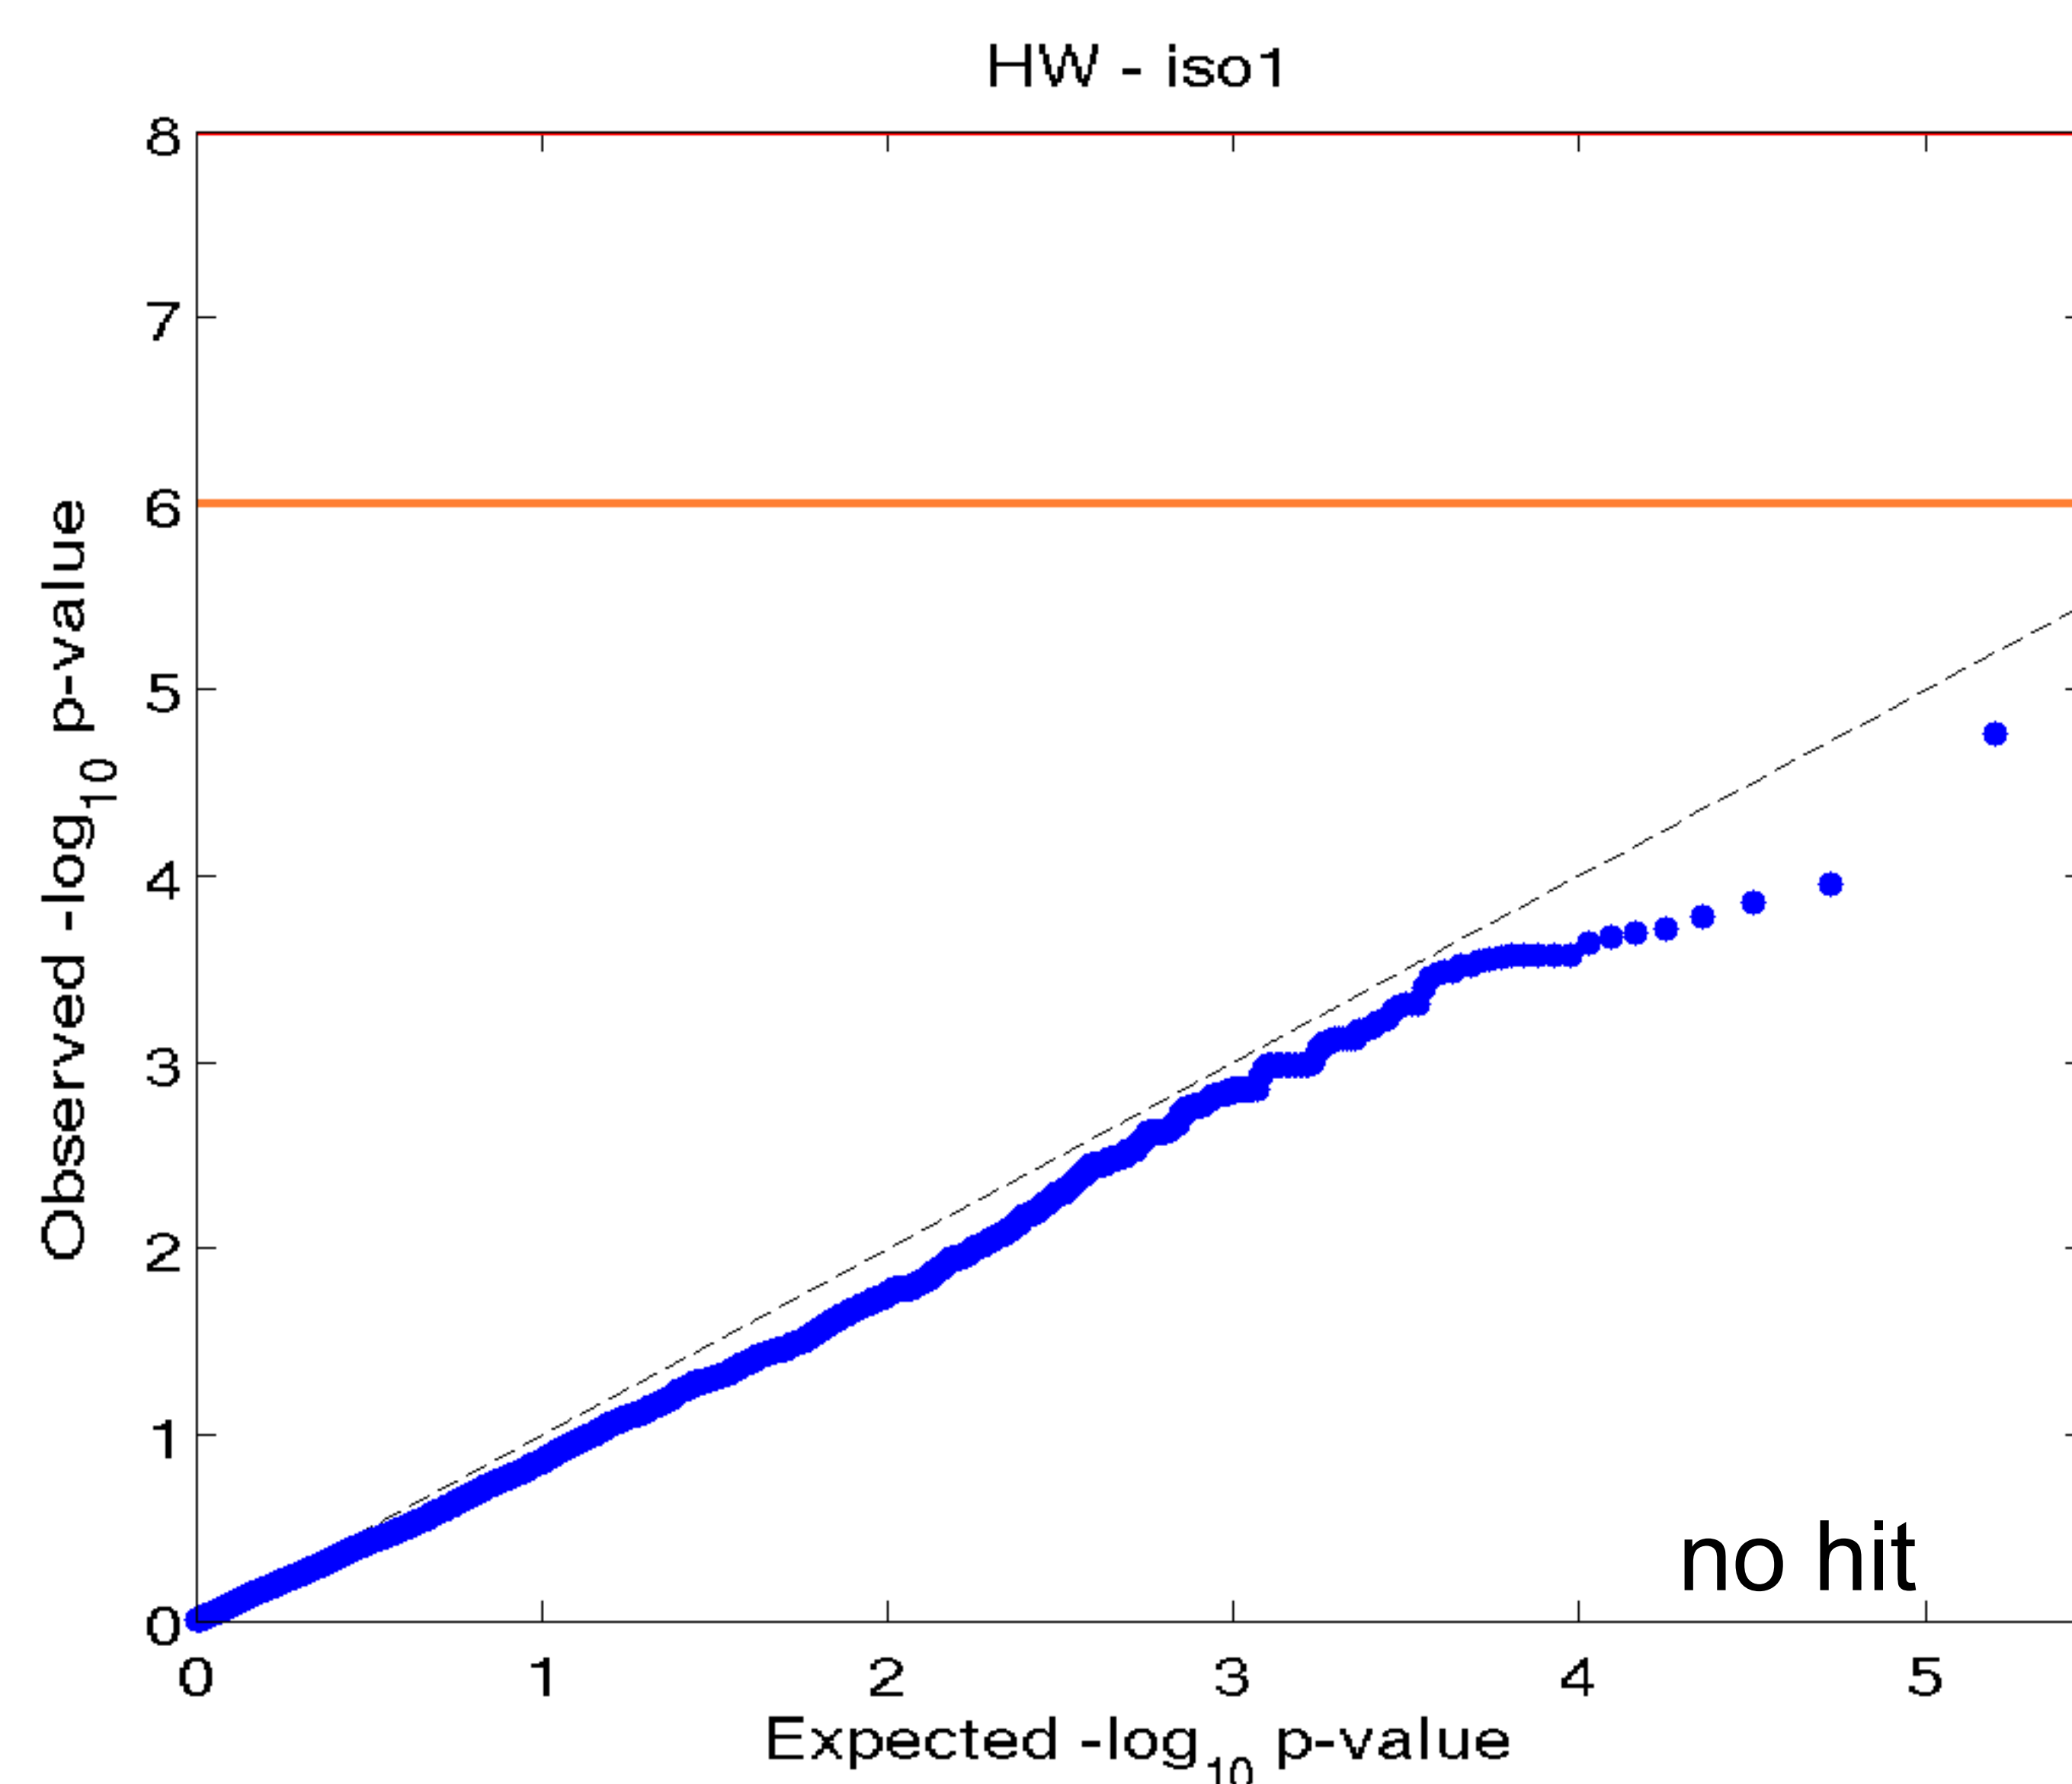



Pamp - iso1

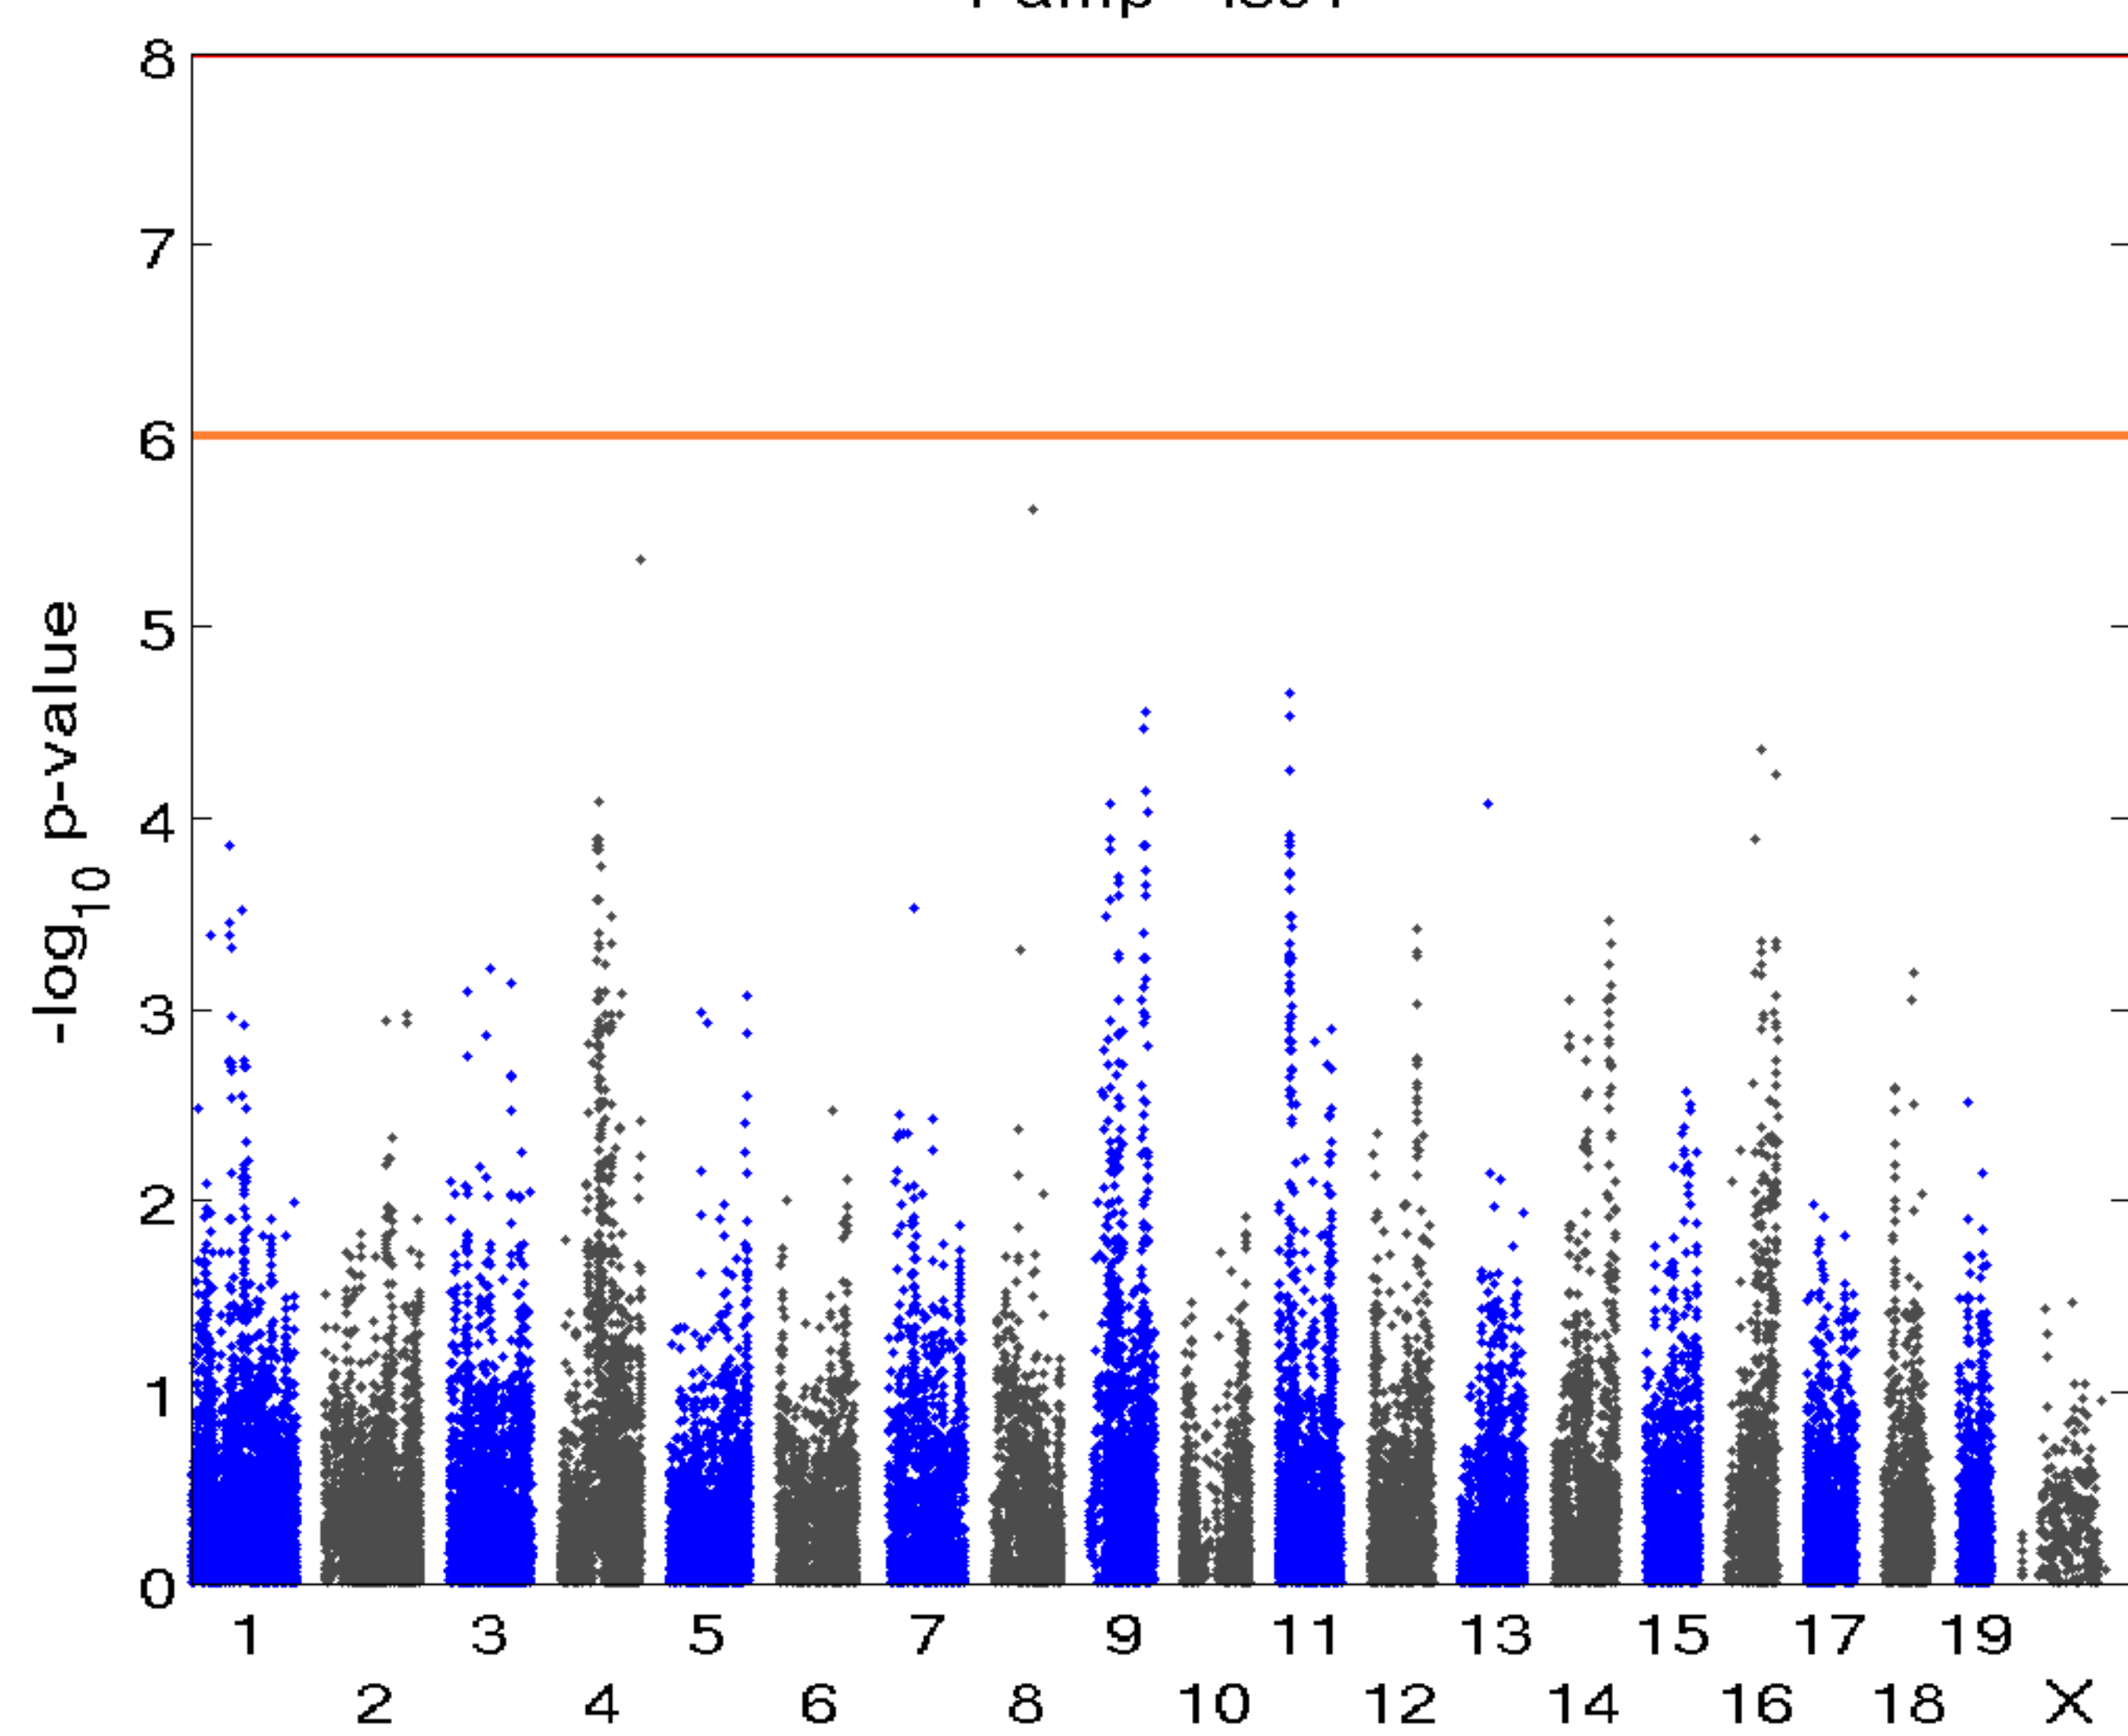

Pamp - iso1

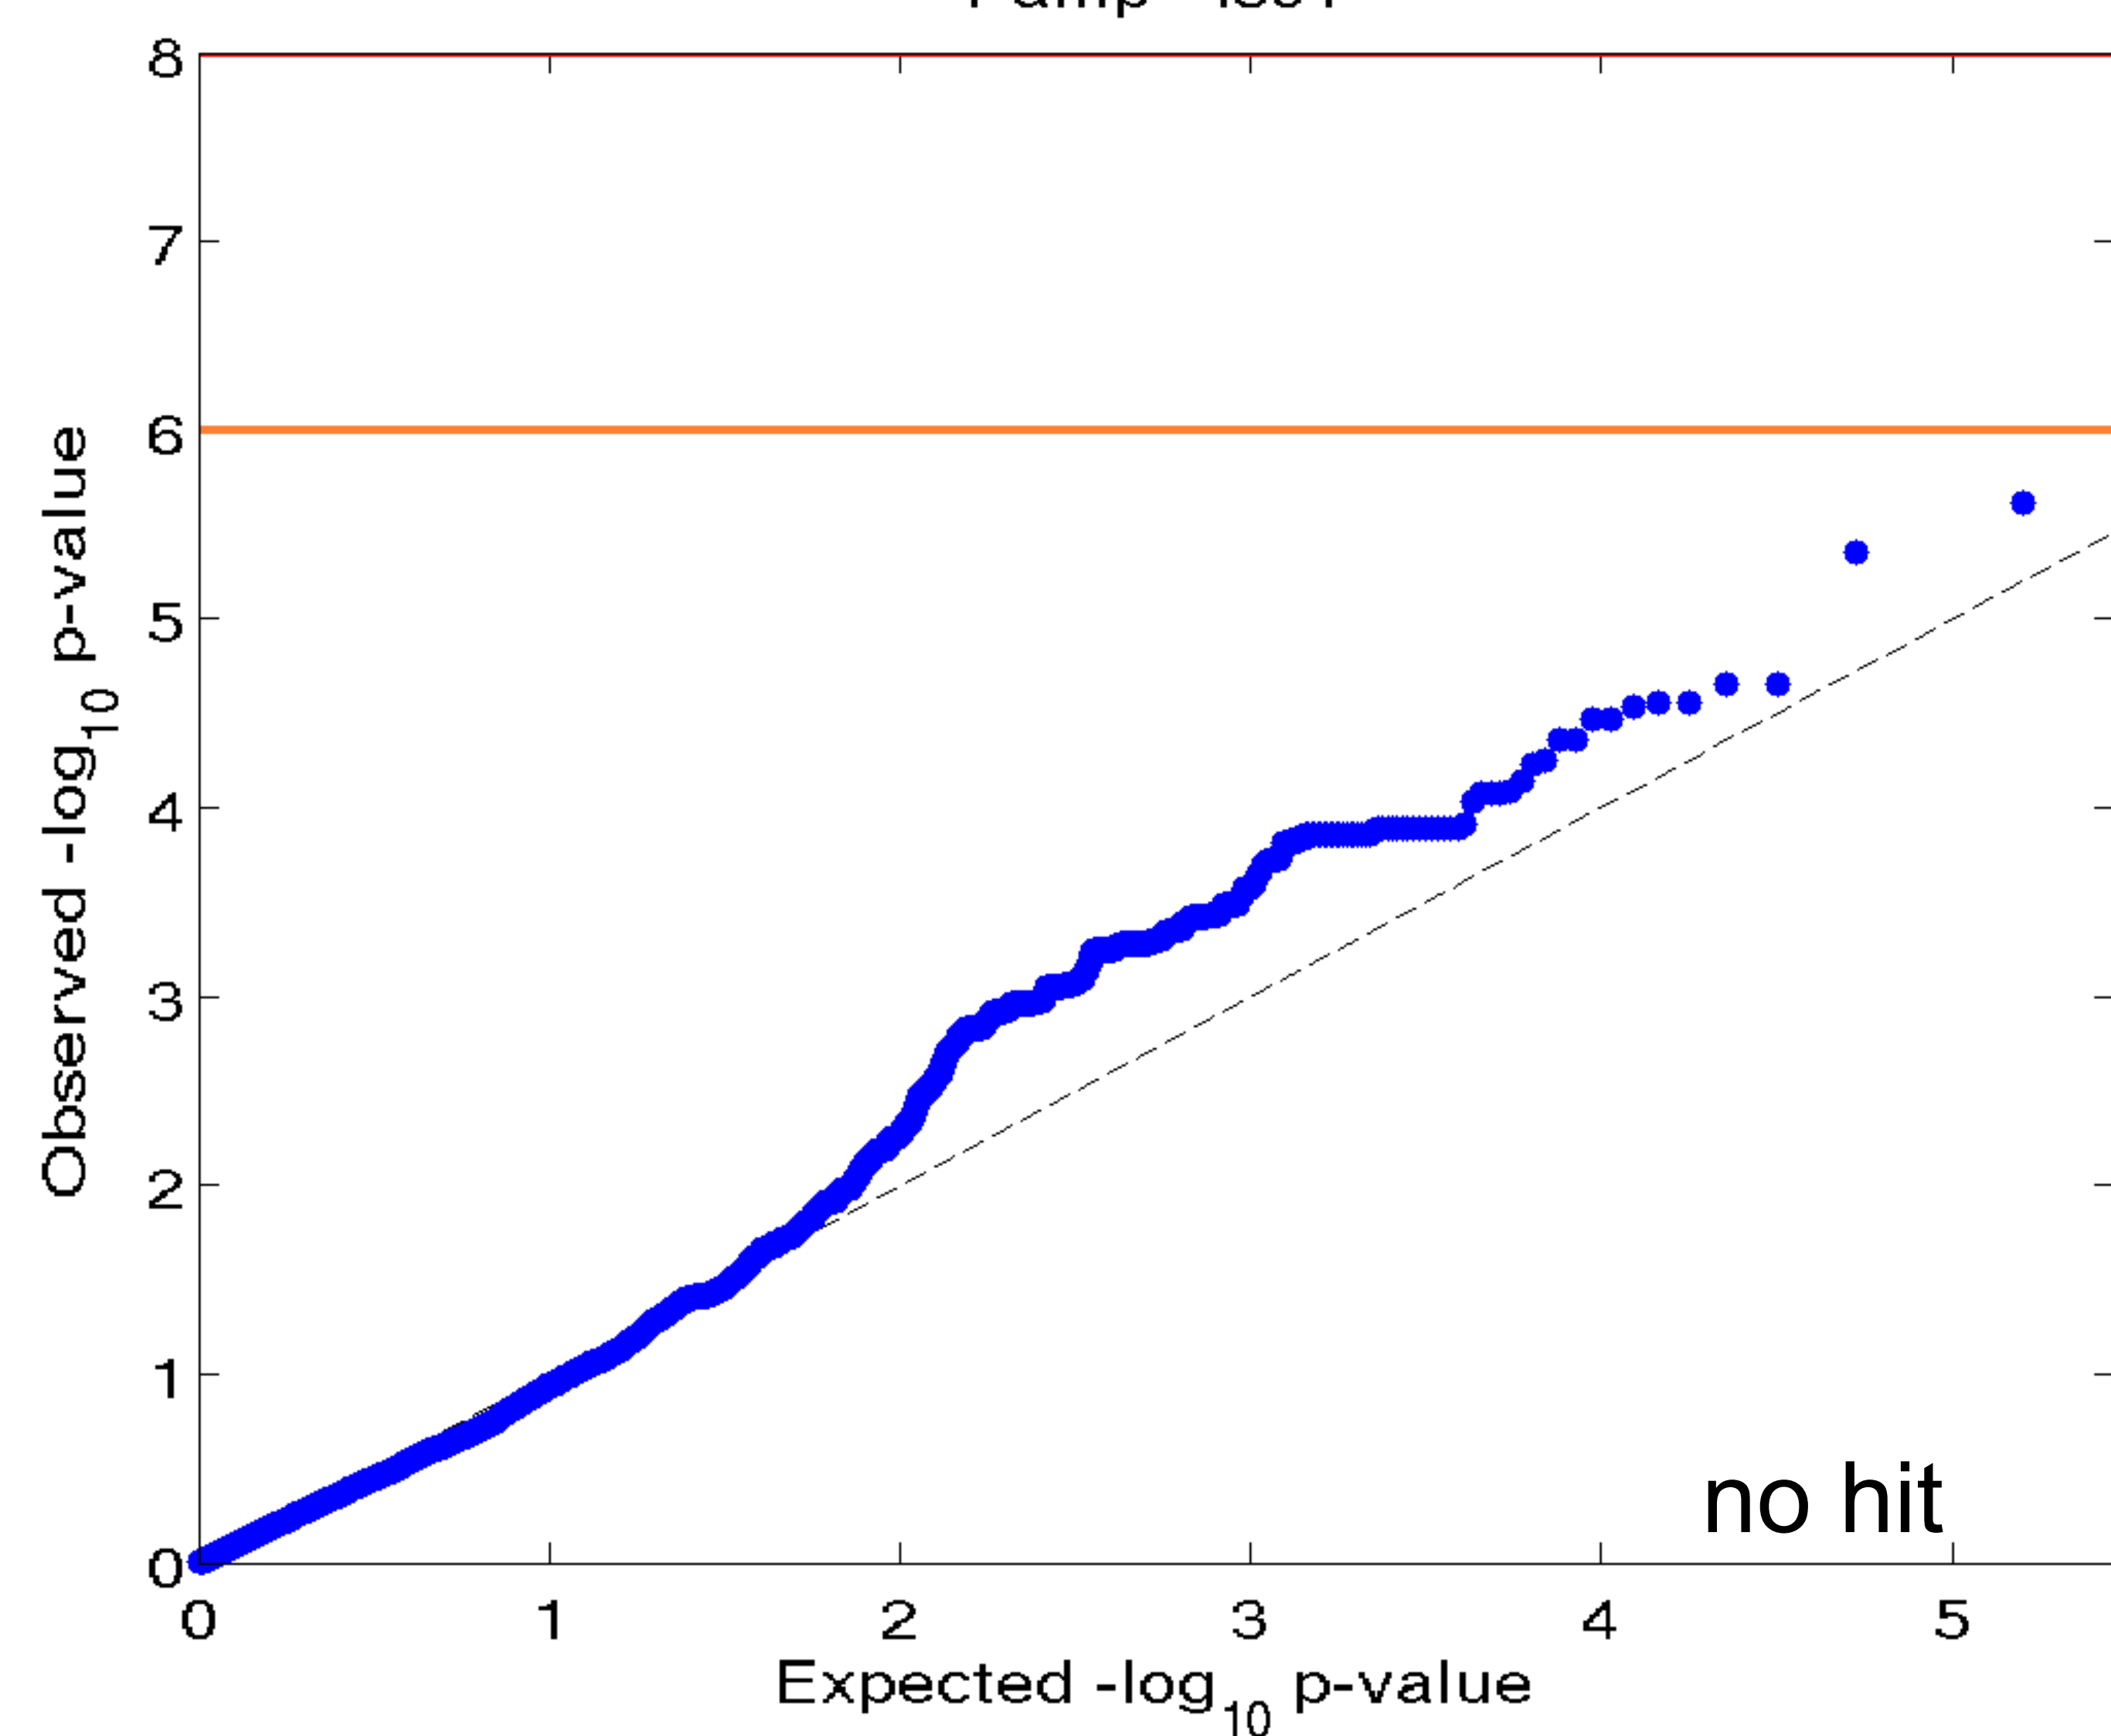

Parea - iso1

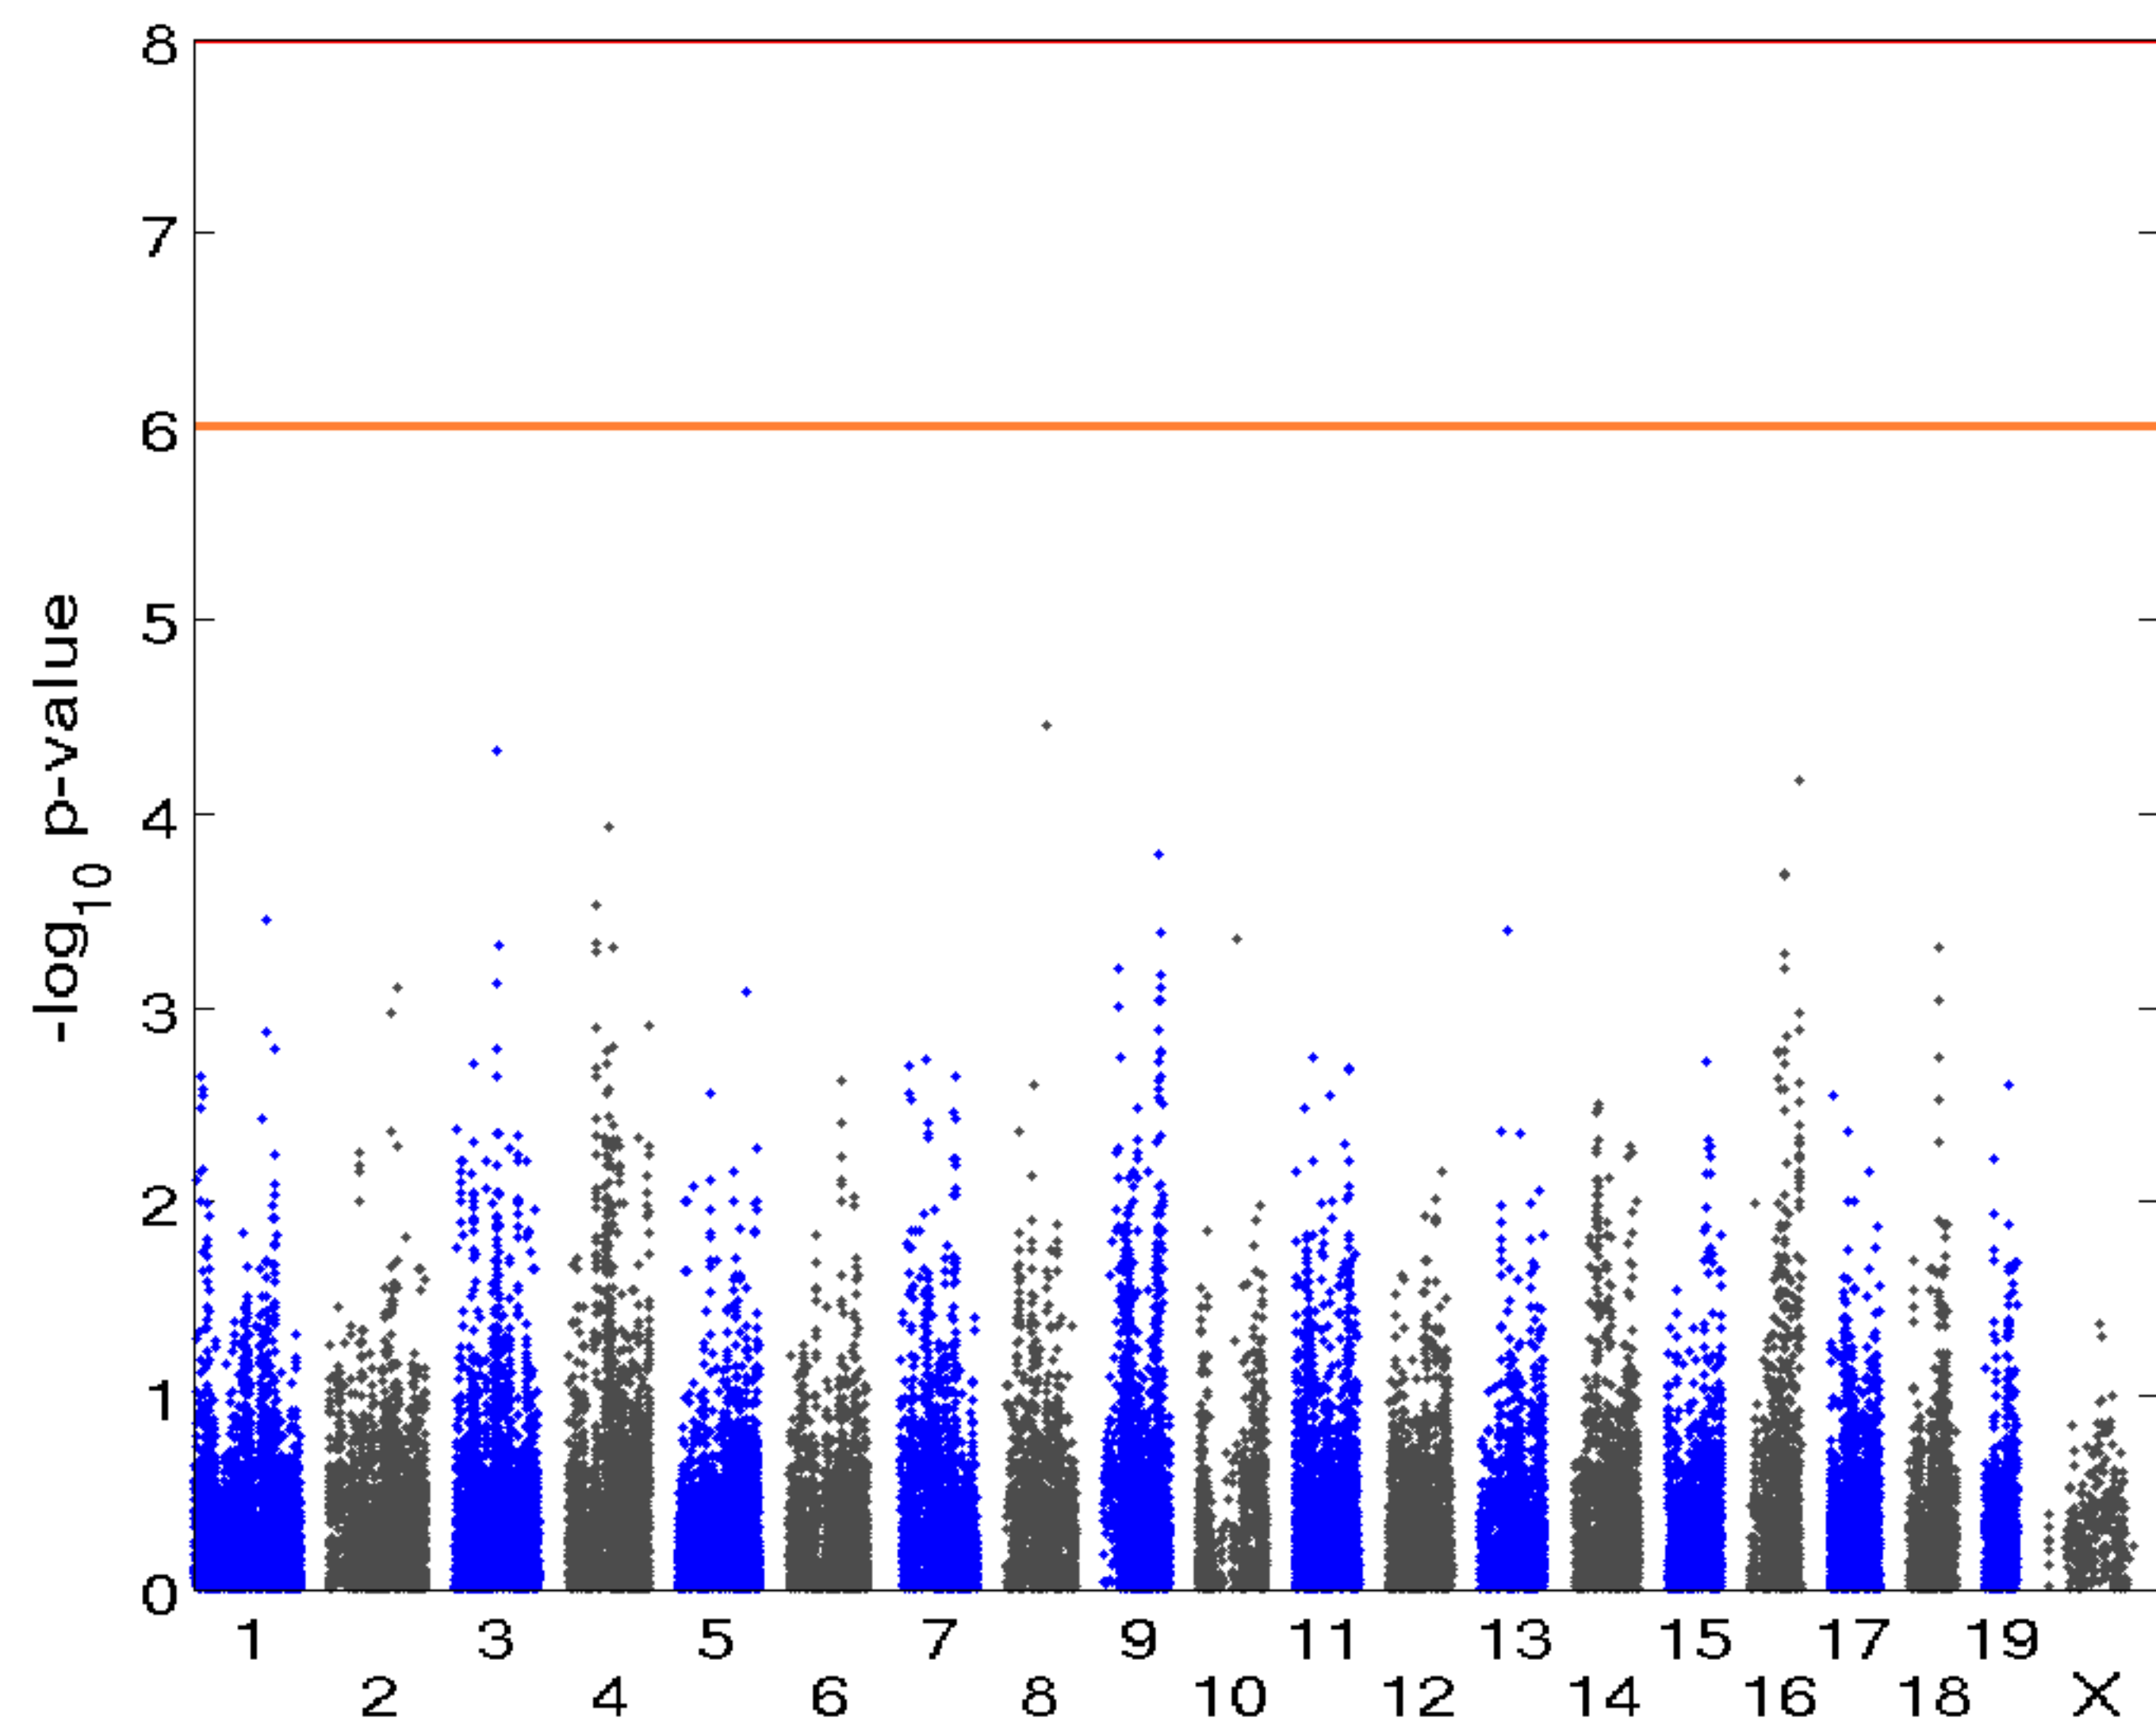

Parea - iso1

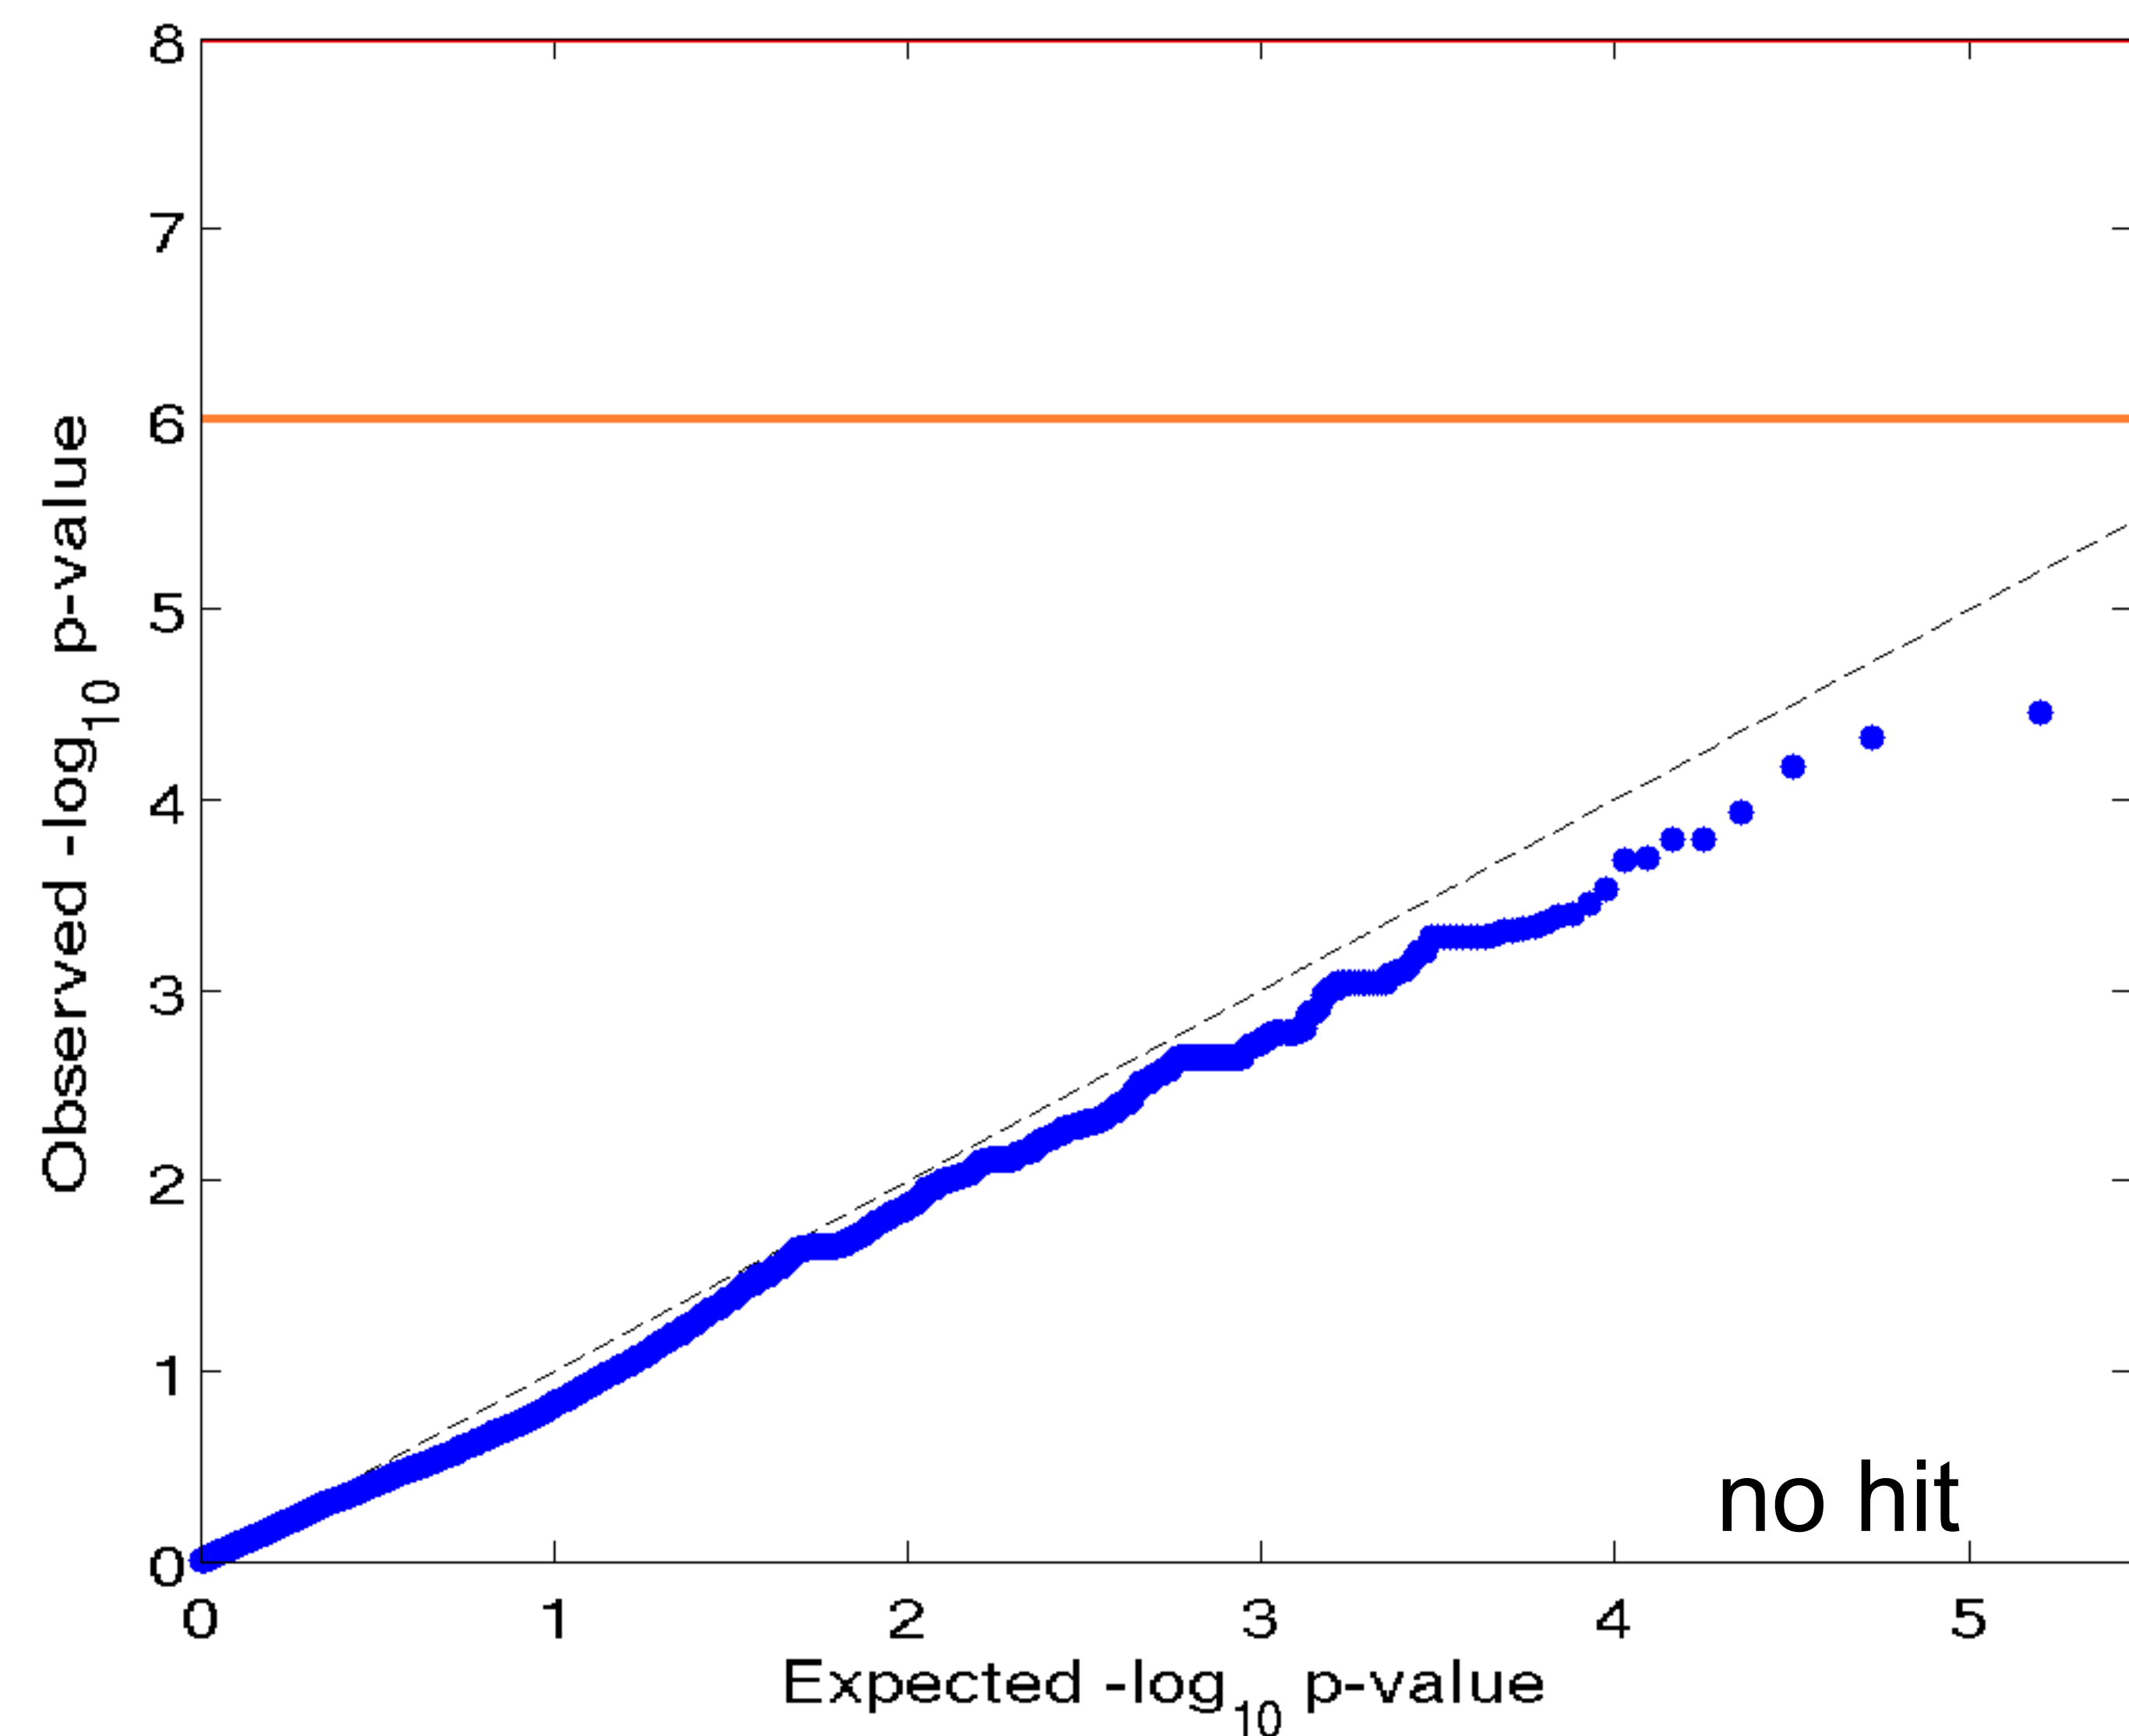

Pdur - iso1

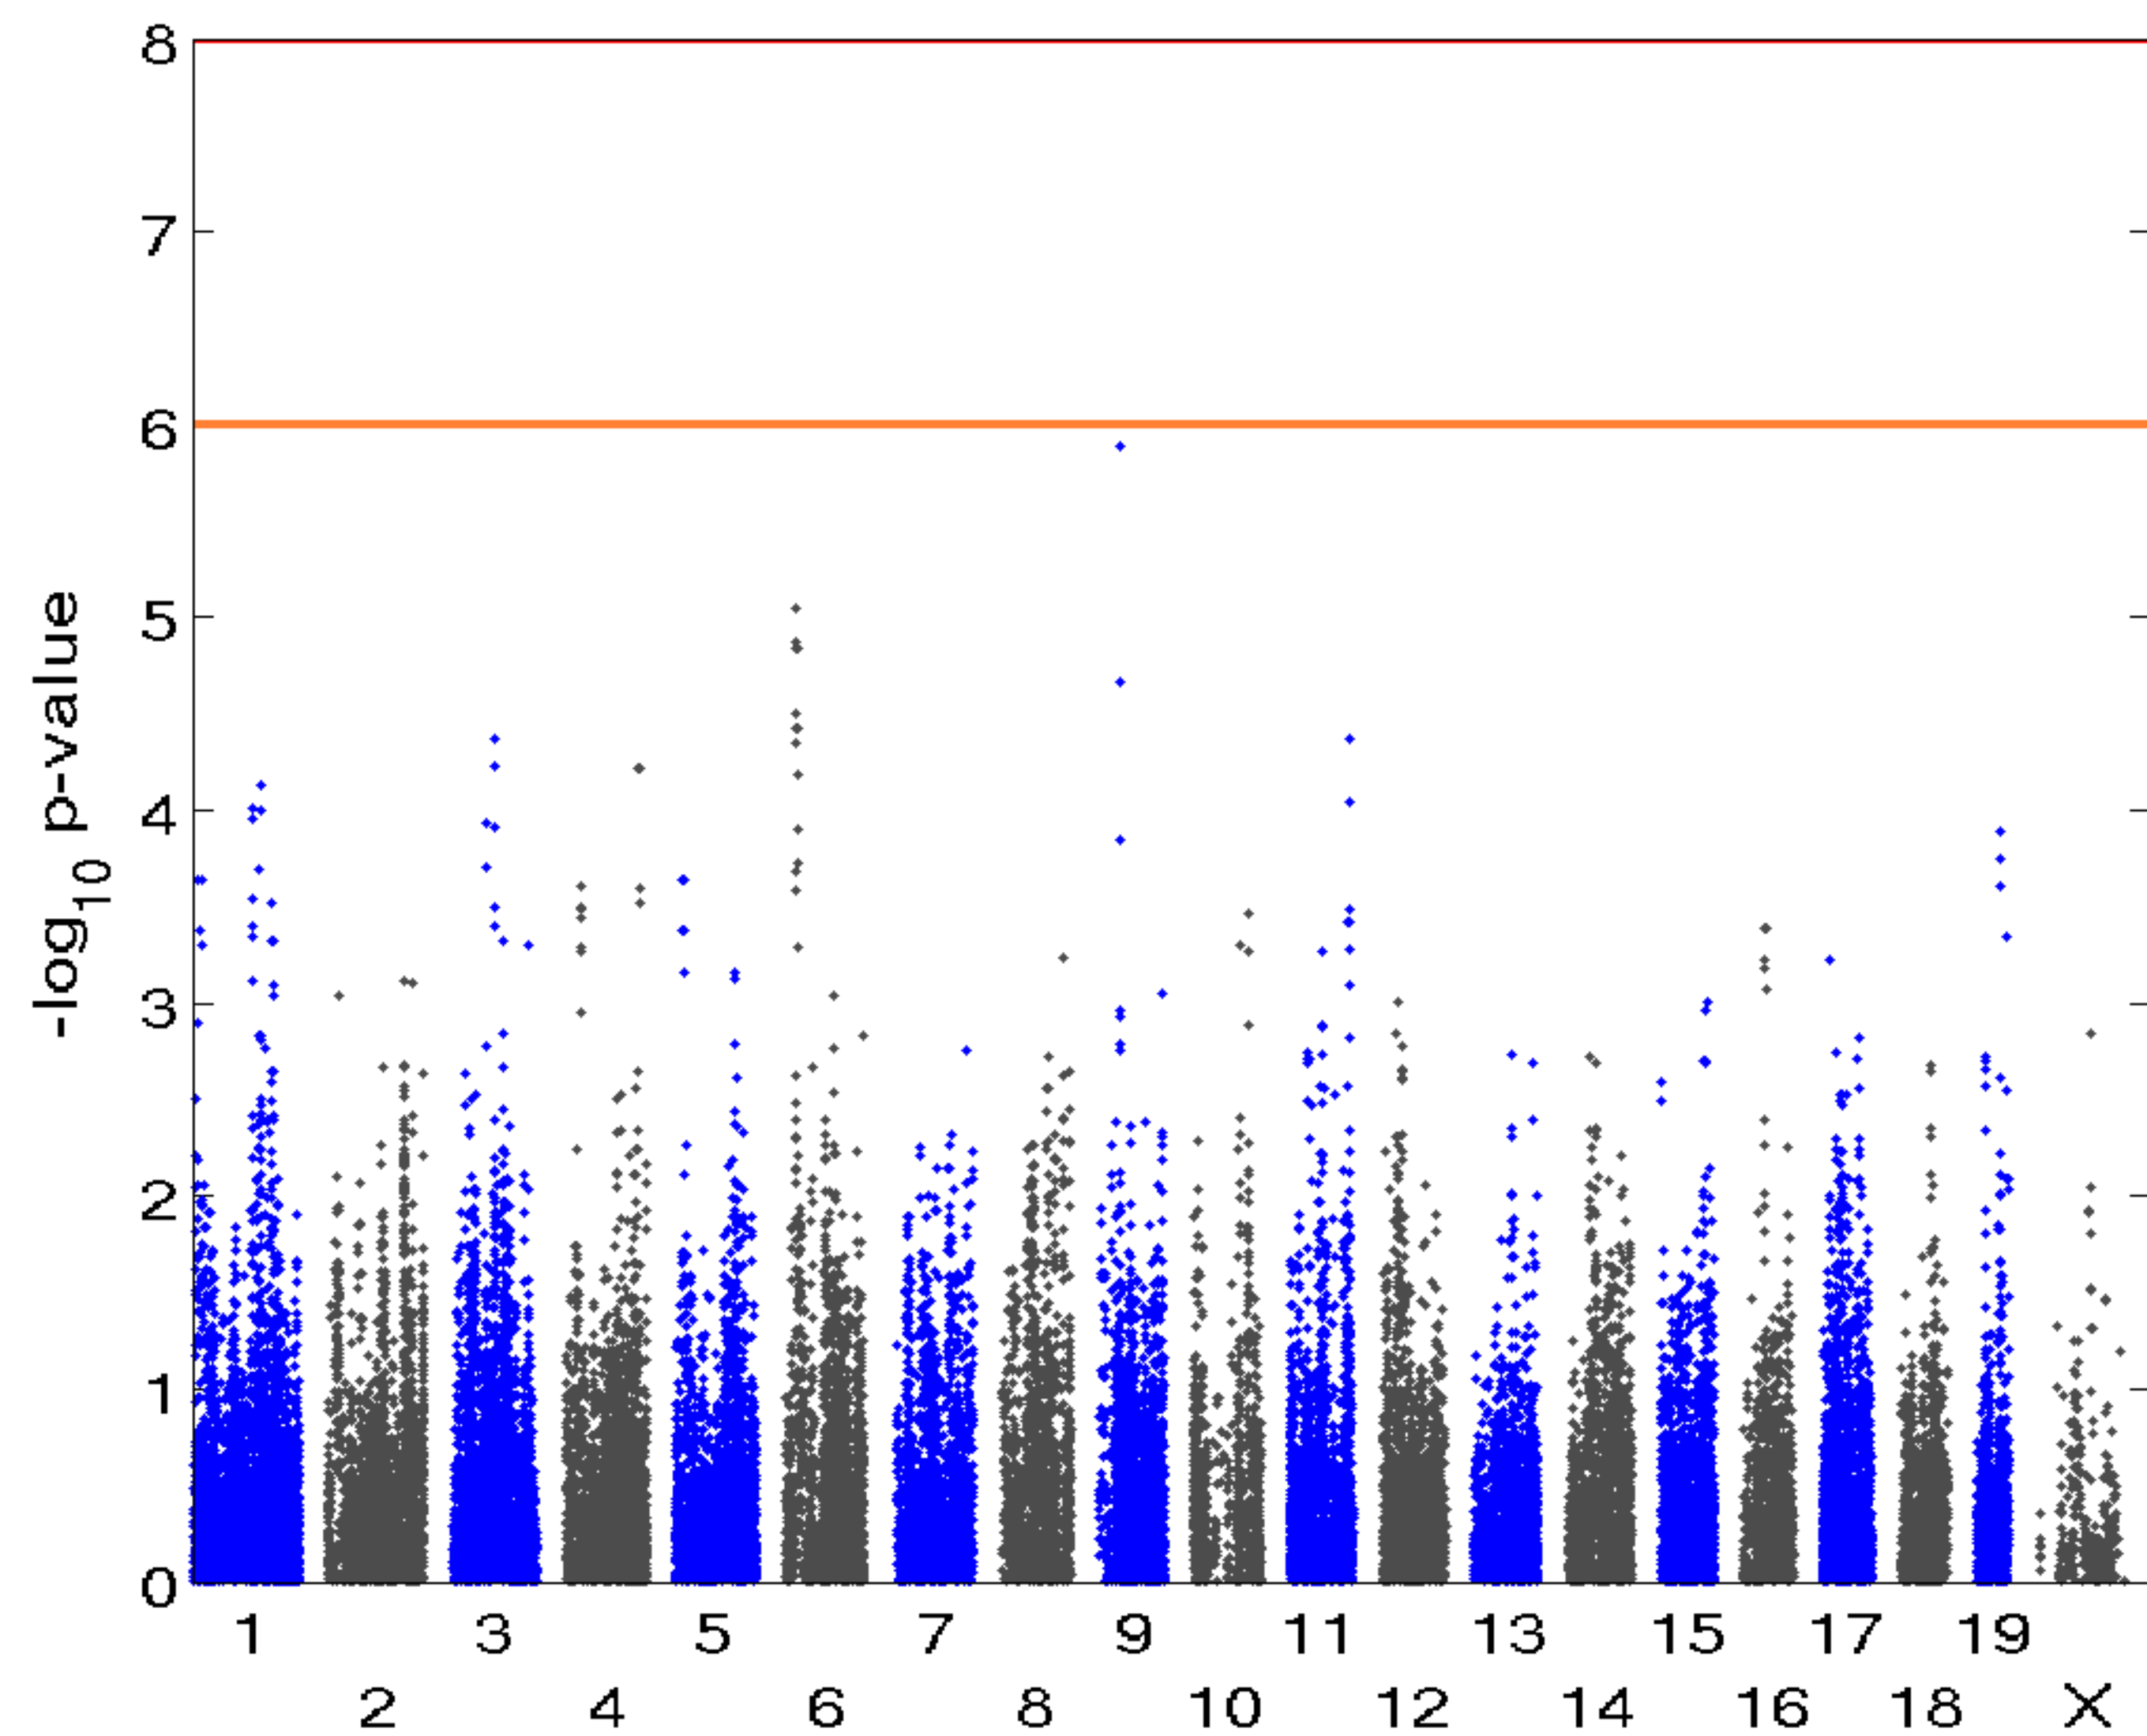

Pdur - iso1

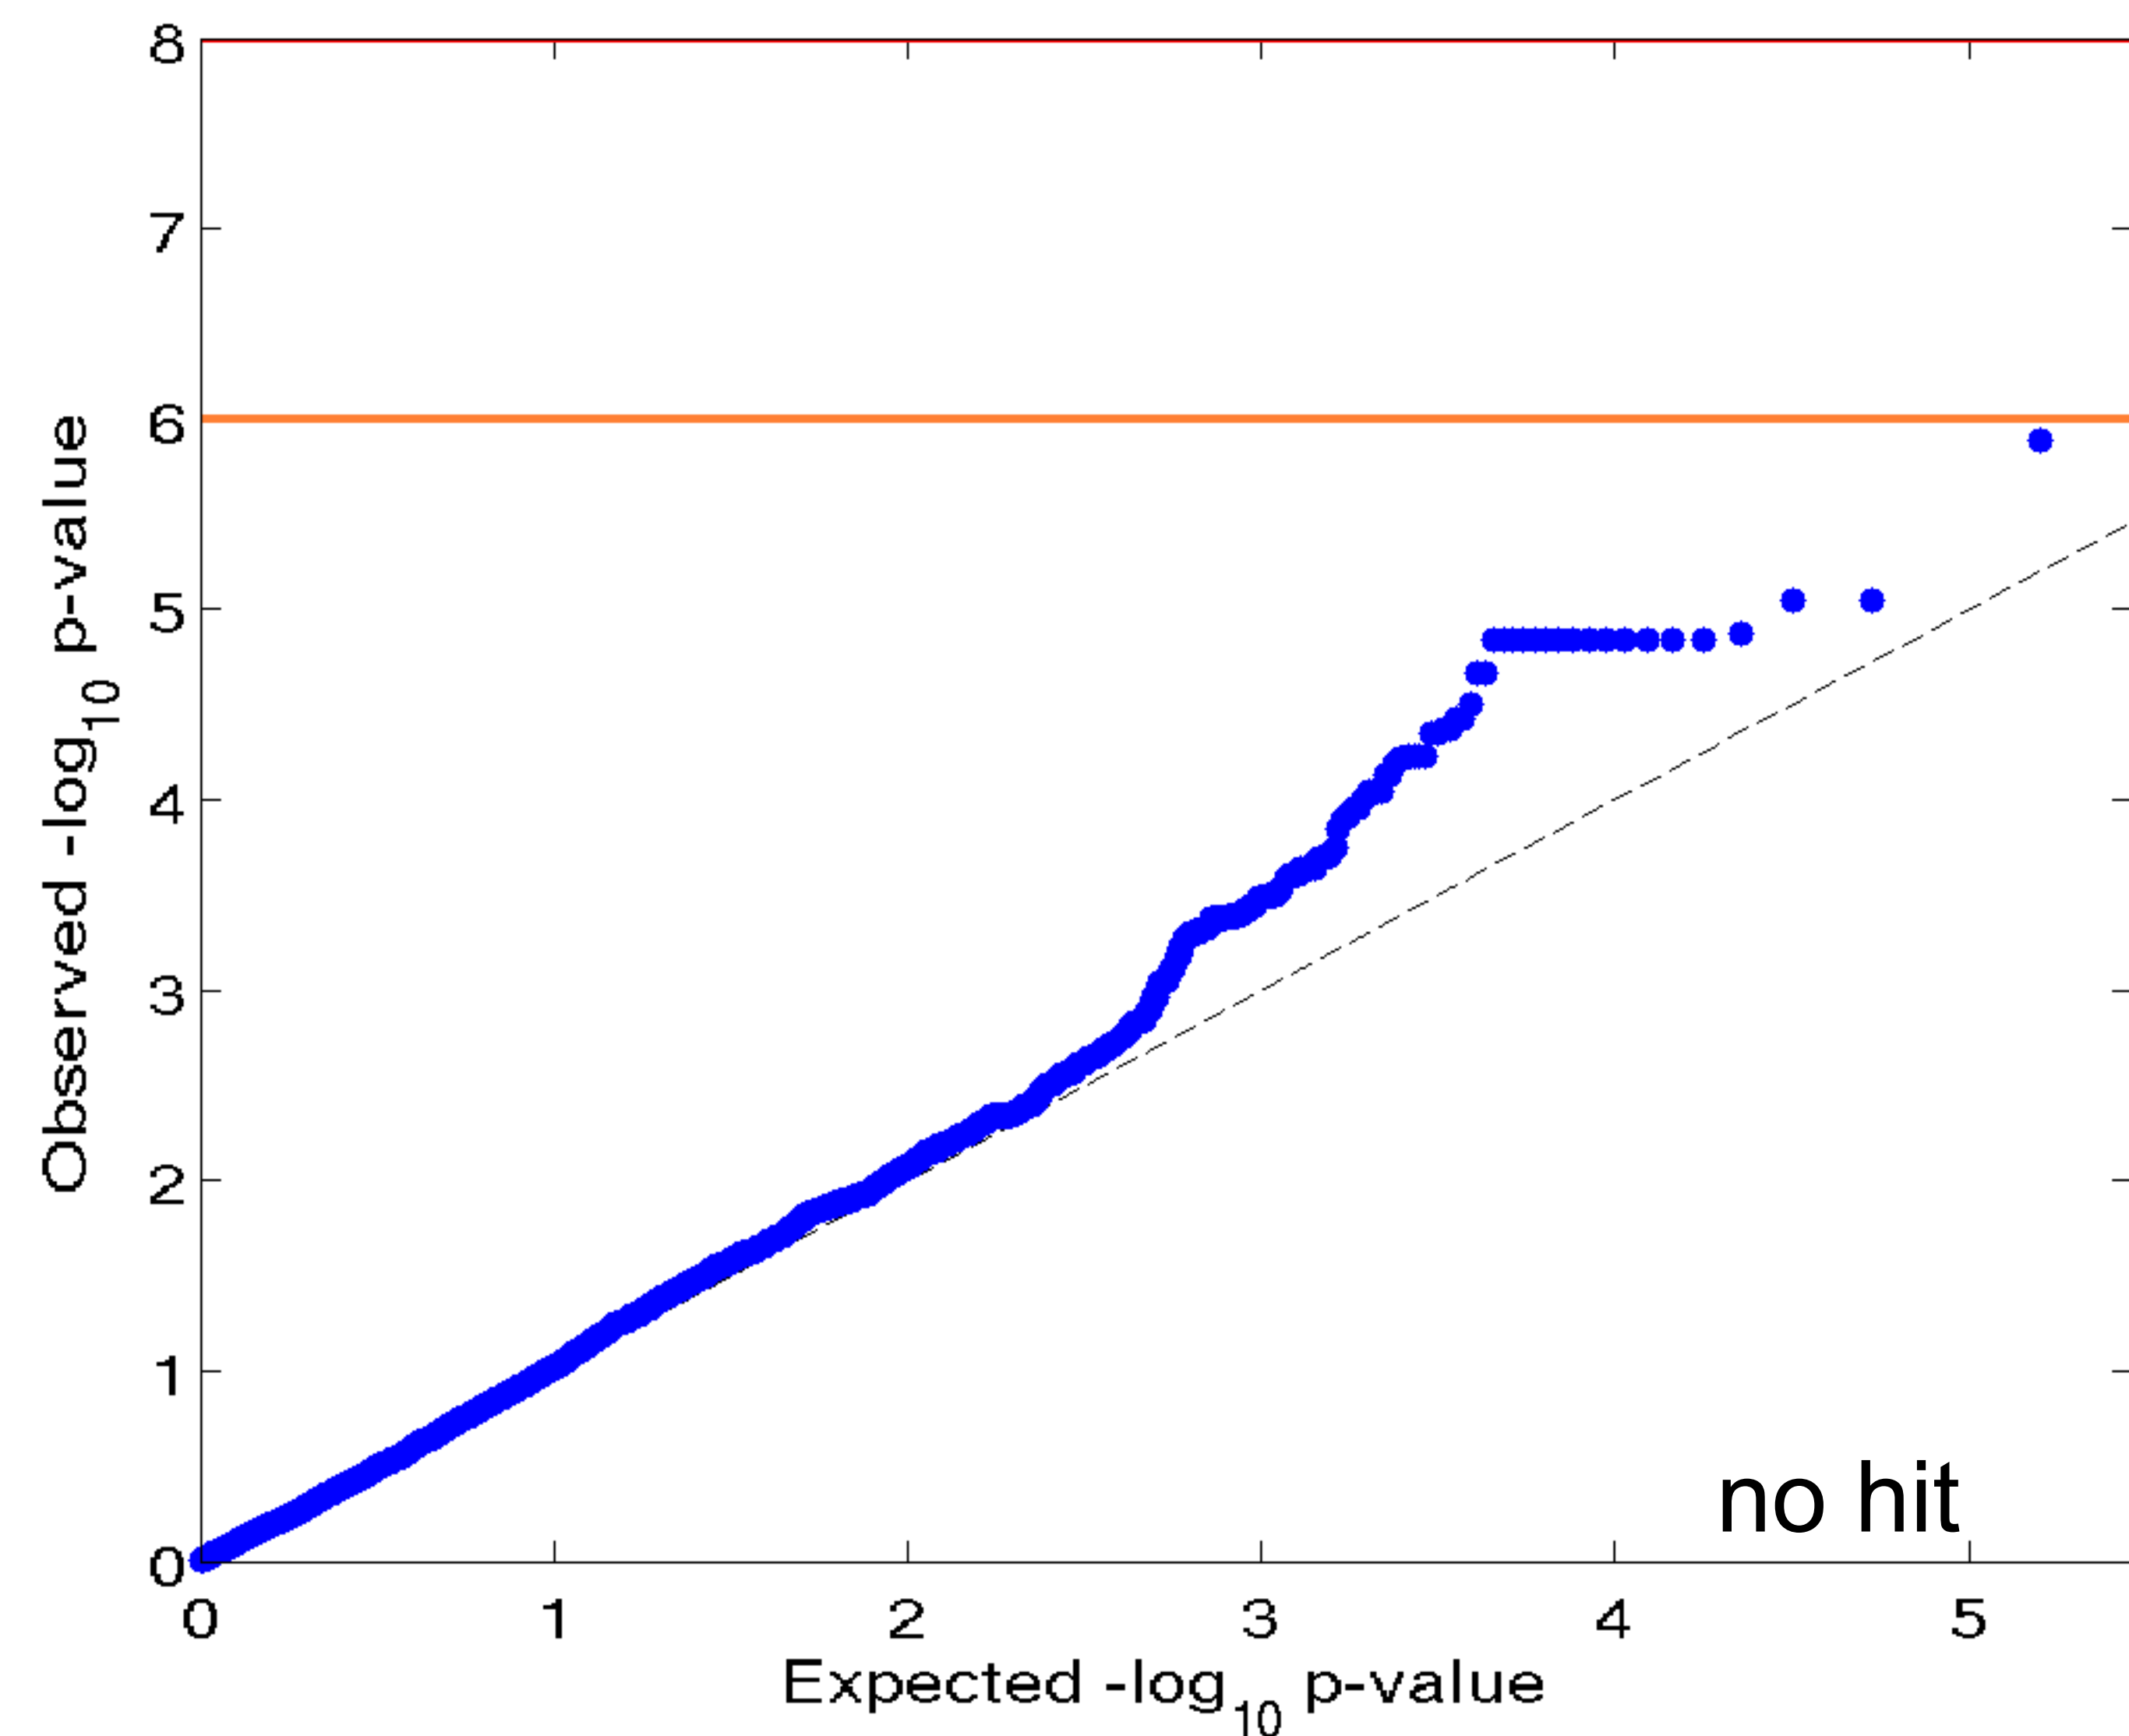

PR - iso1

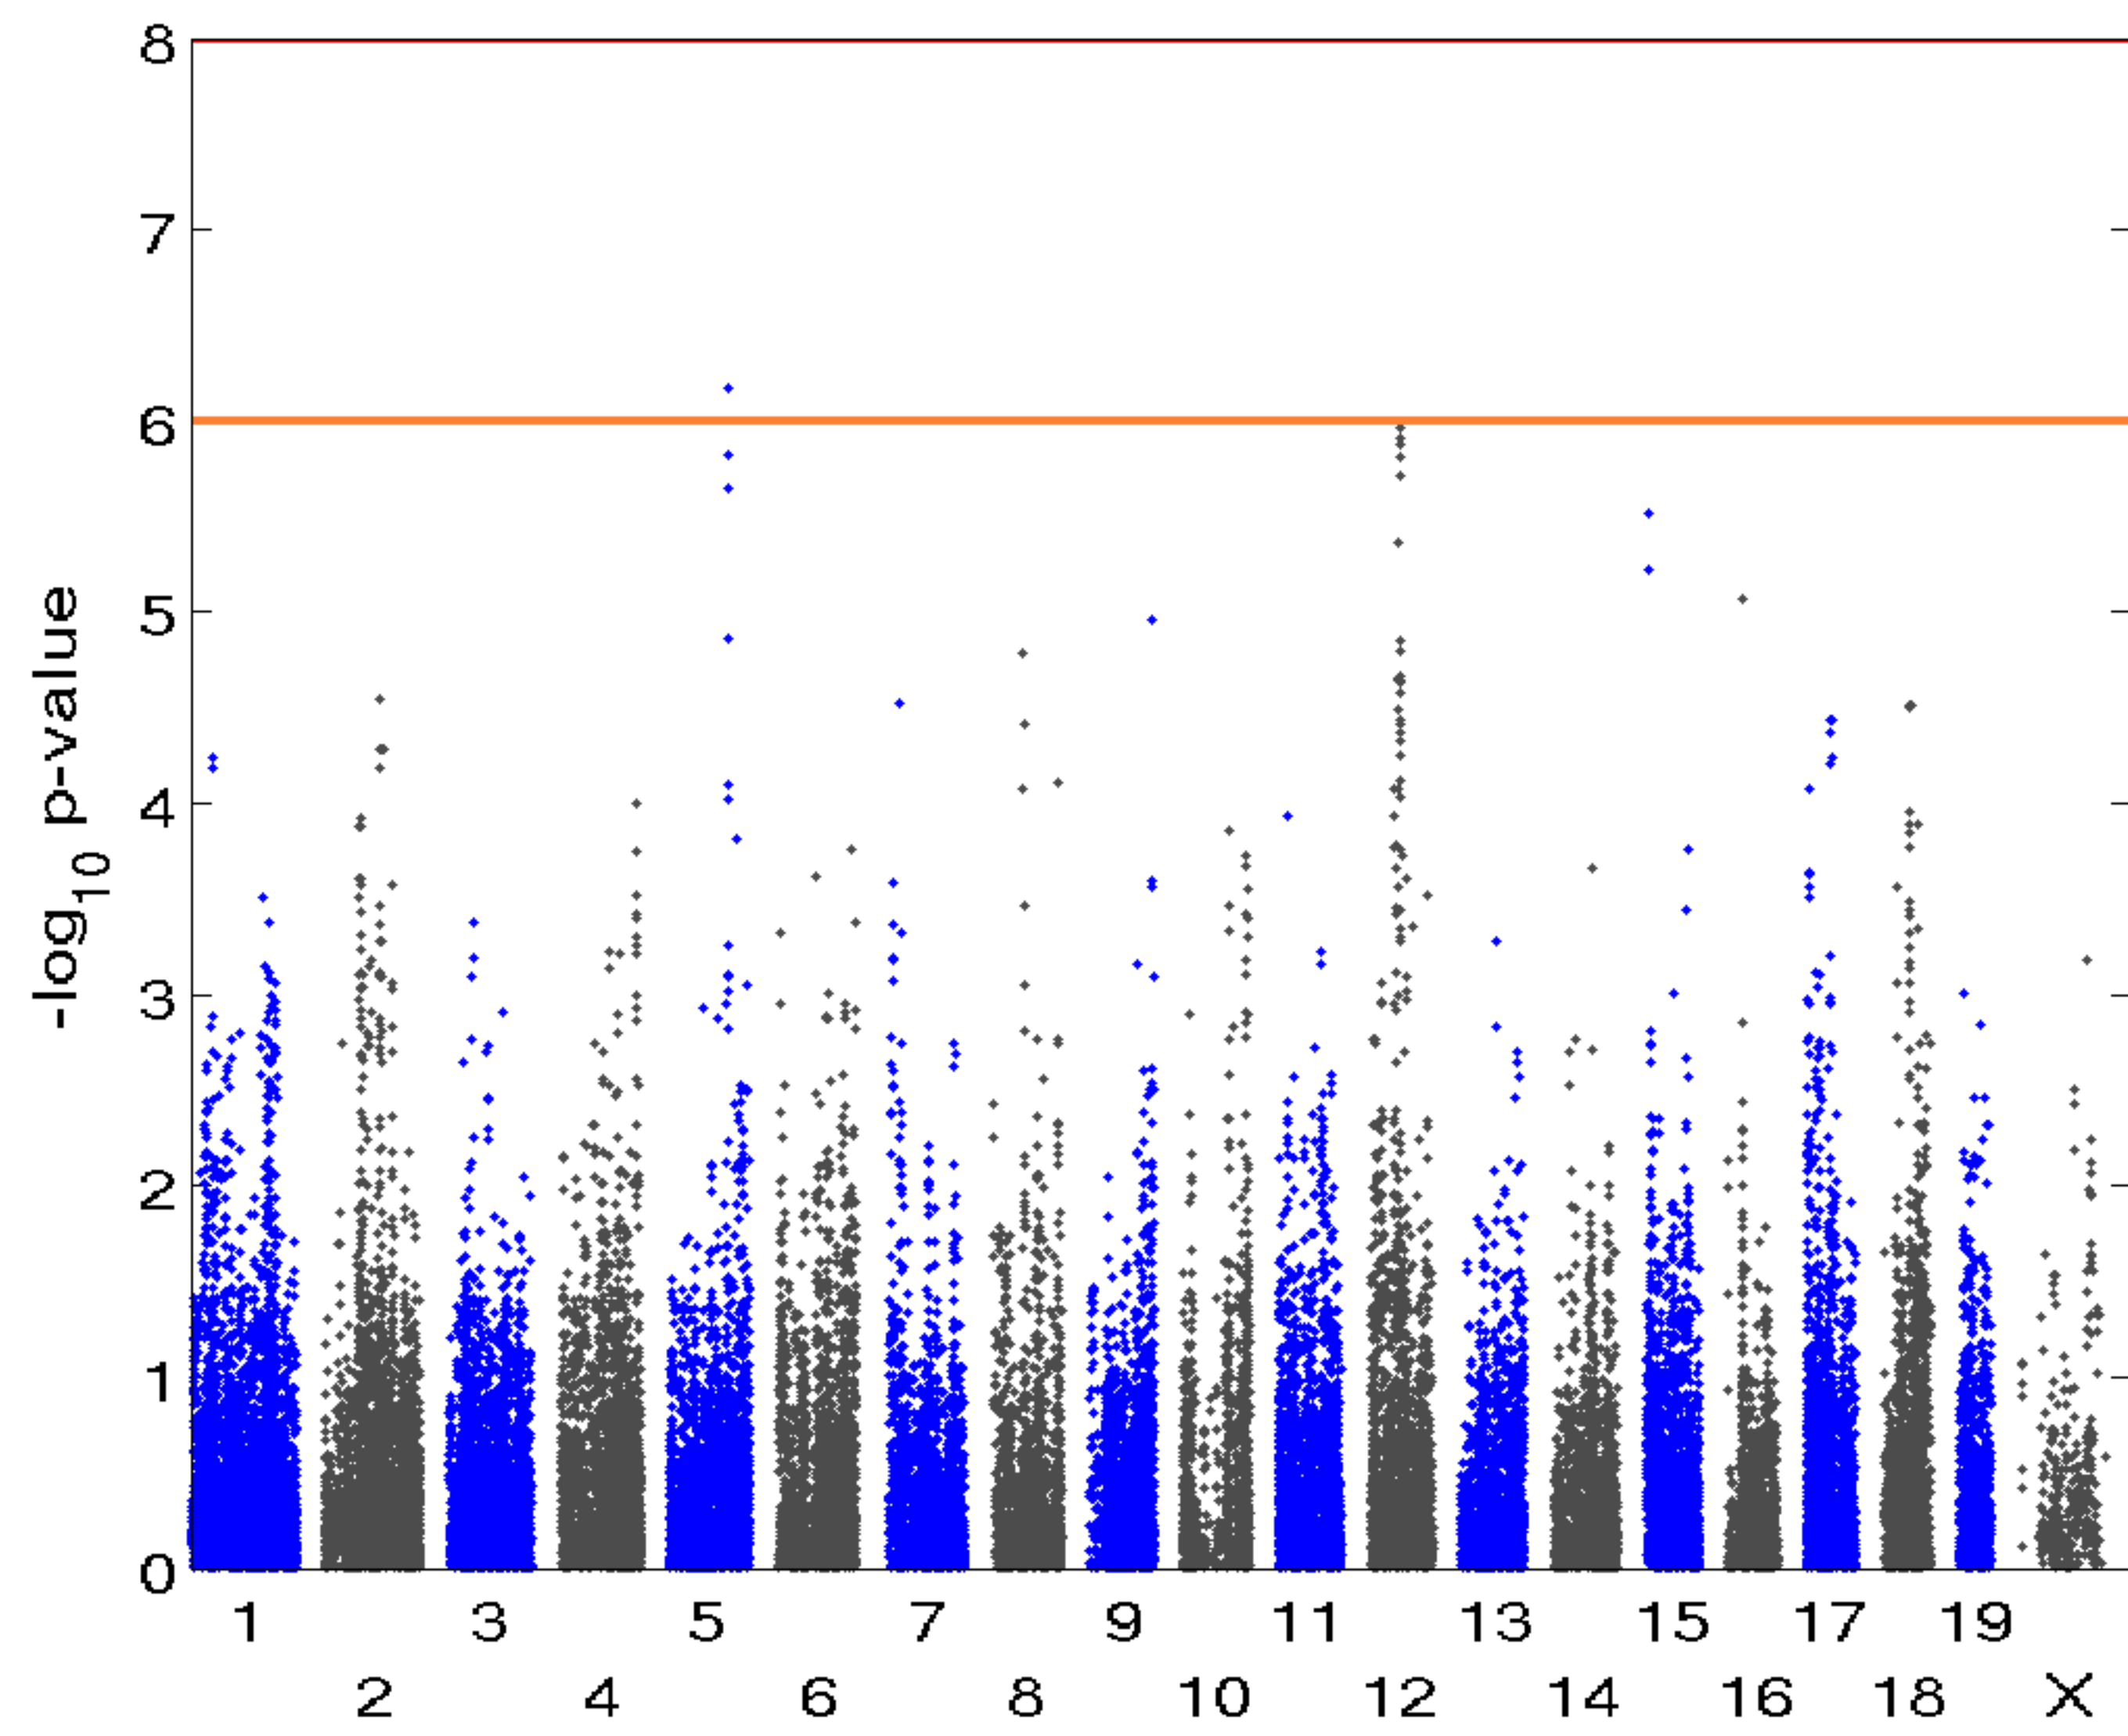

PR - iso1

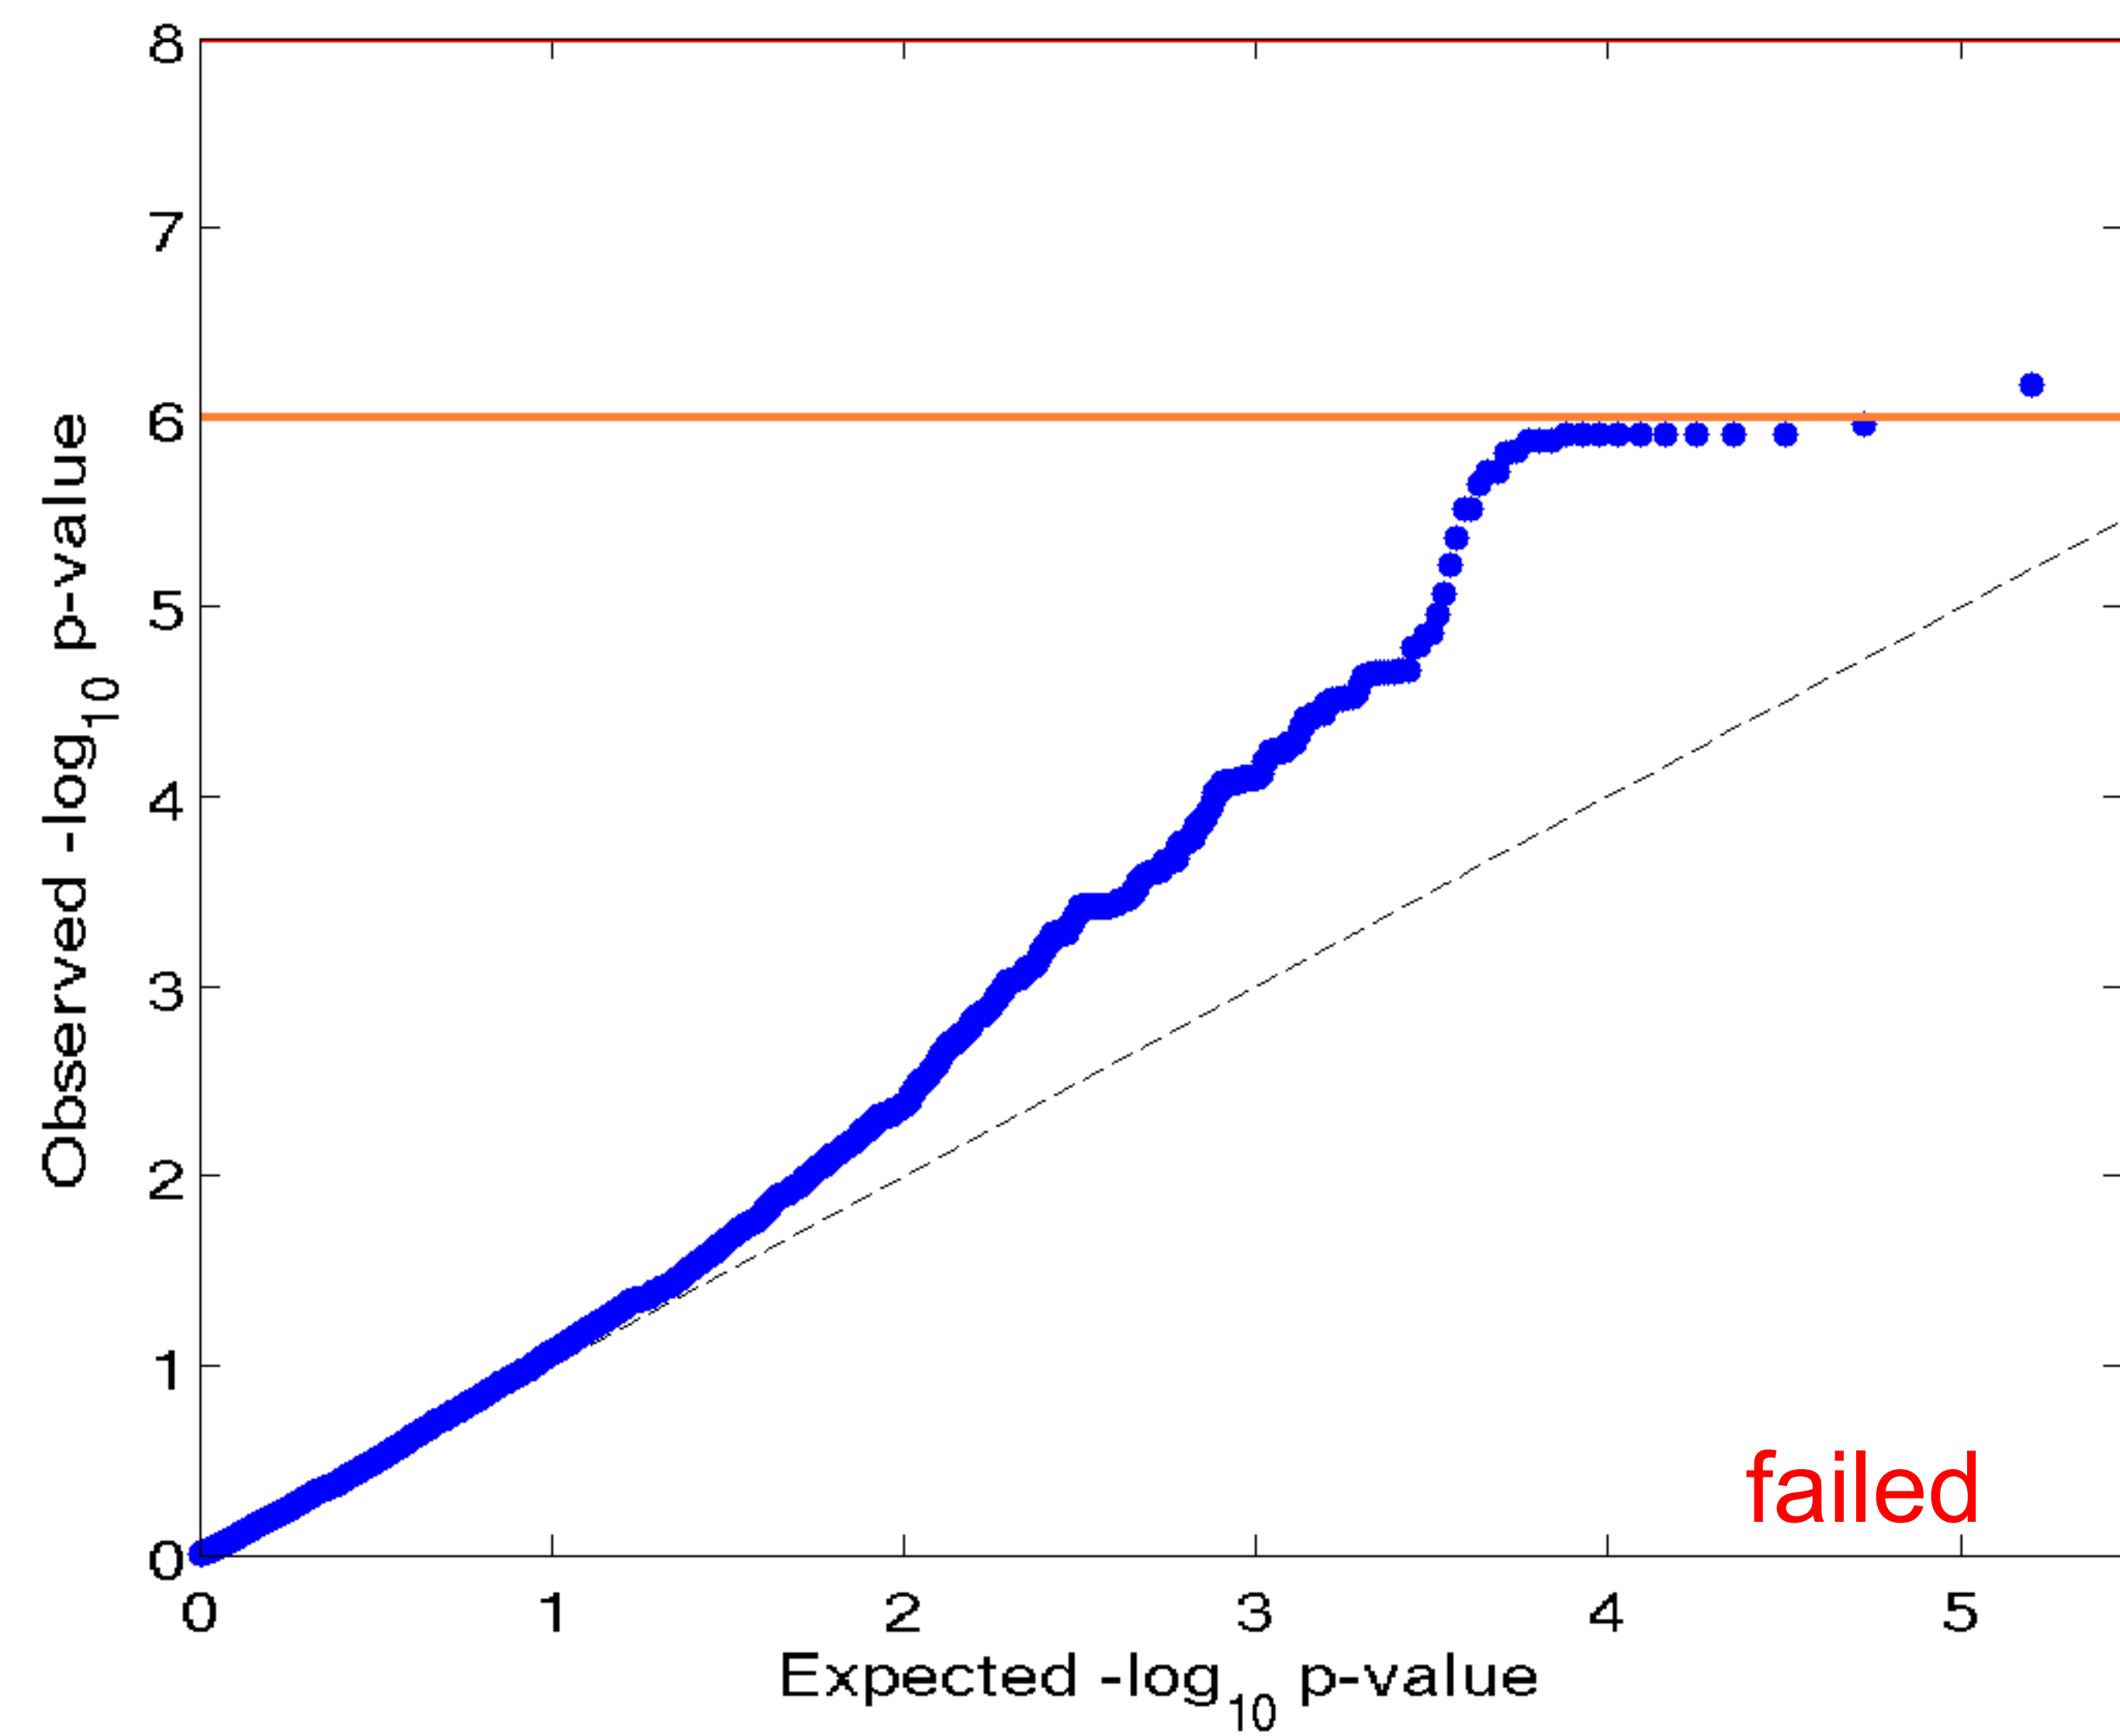



Qamp - iso1

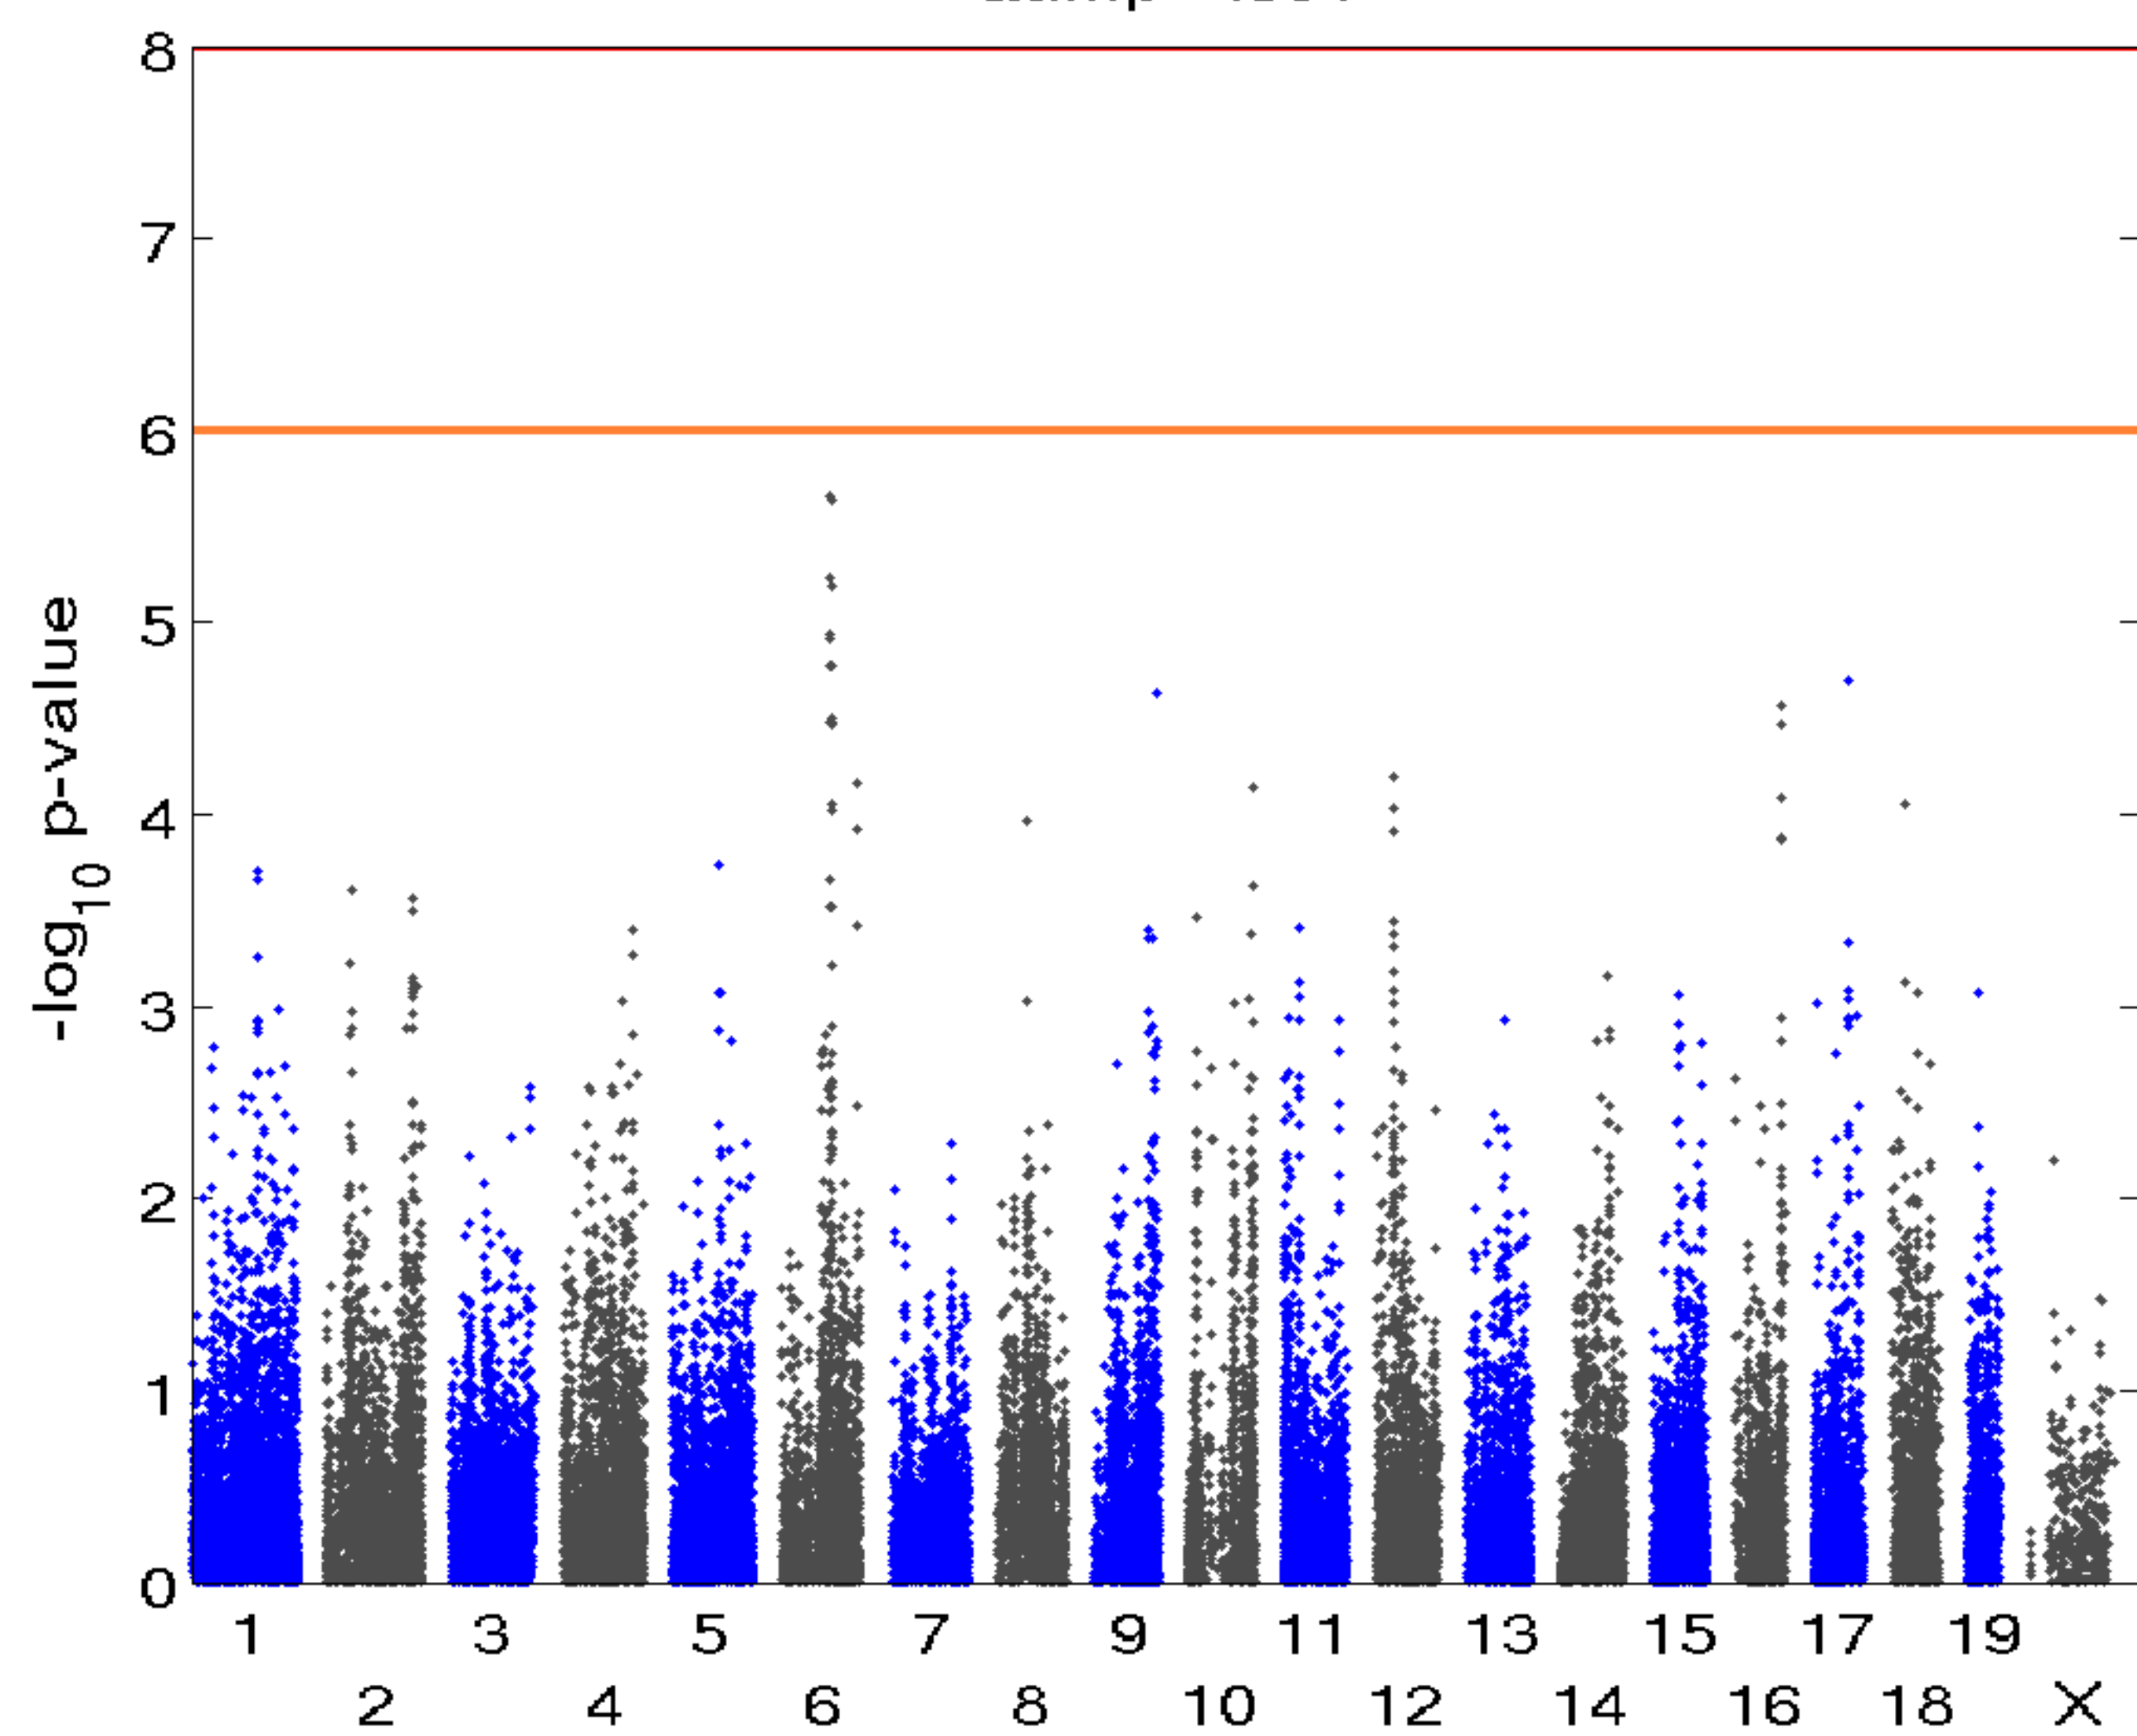

Qamp - iso1

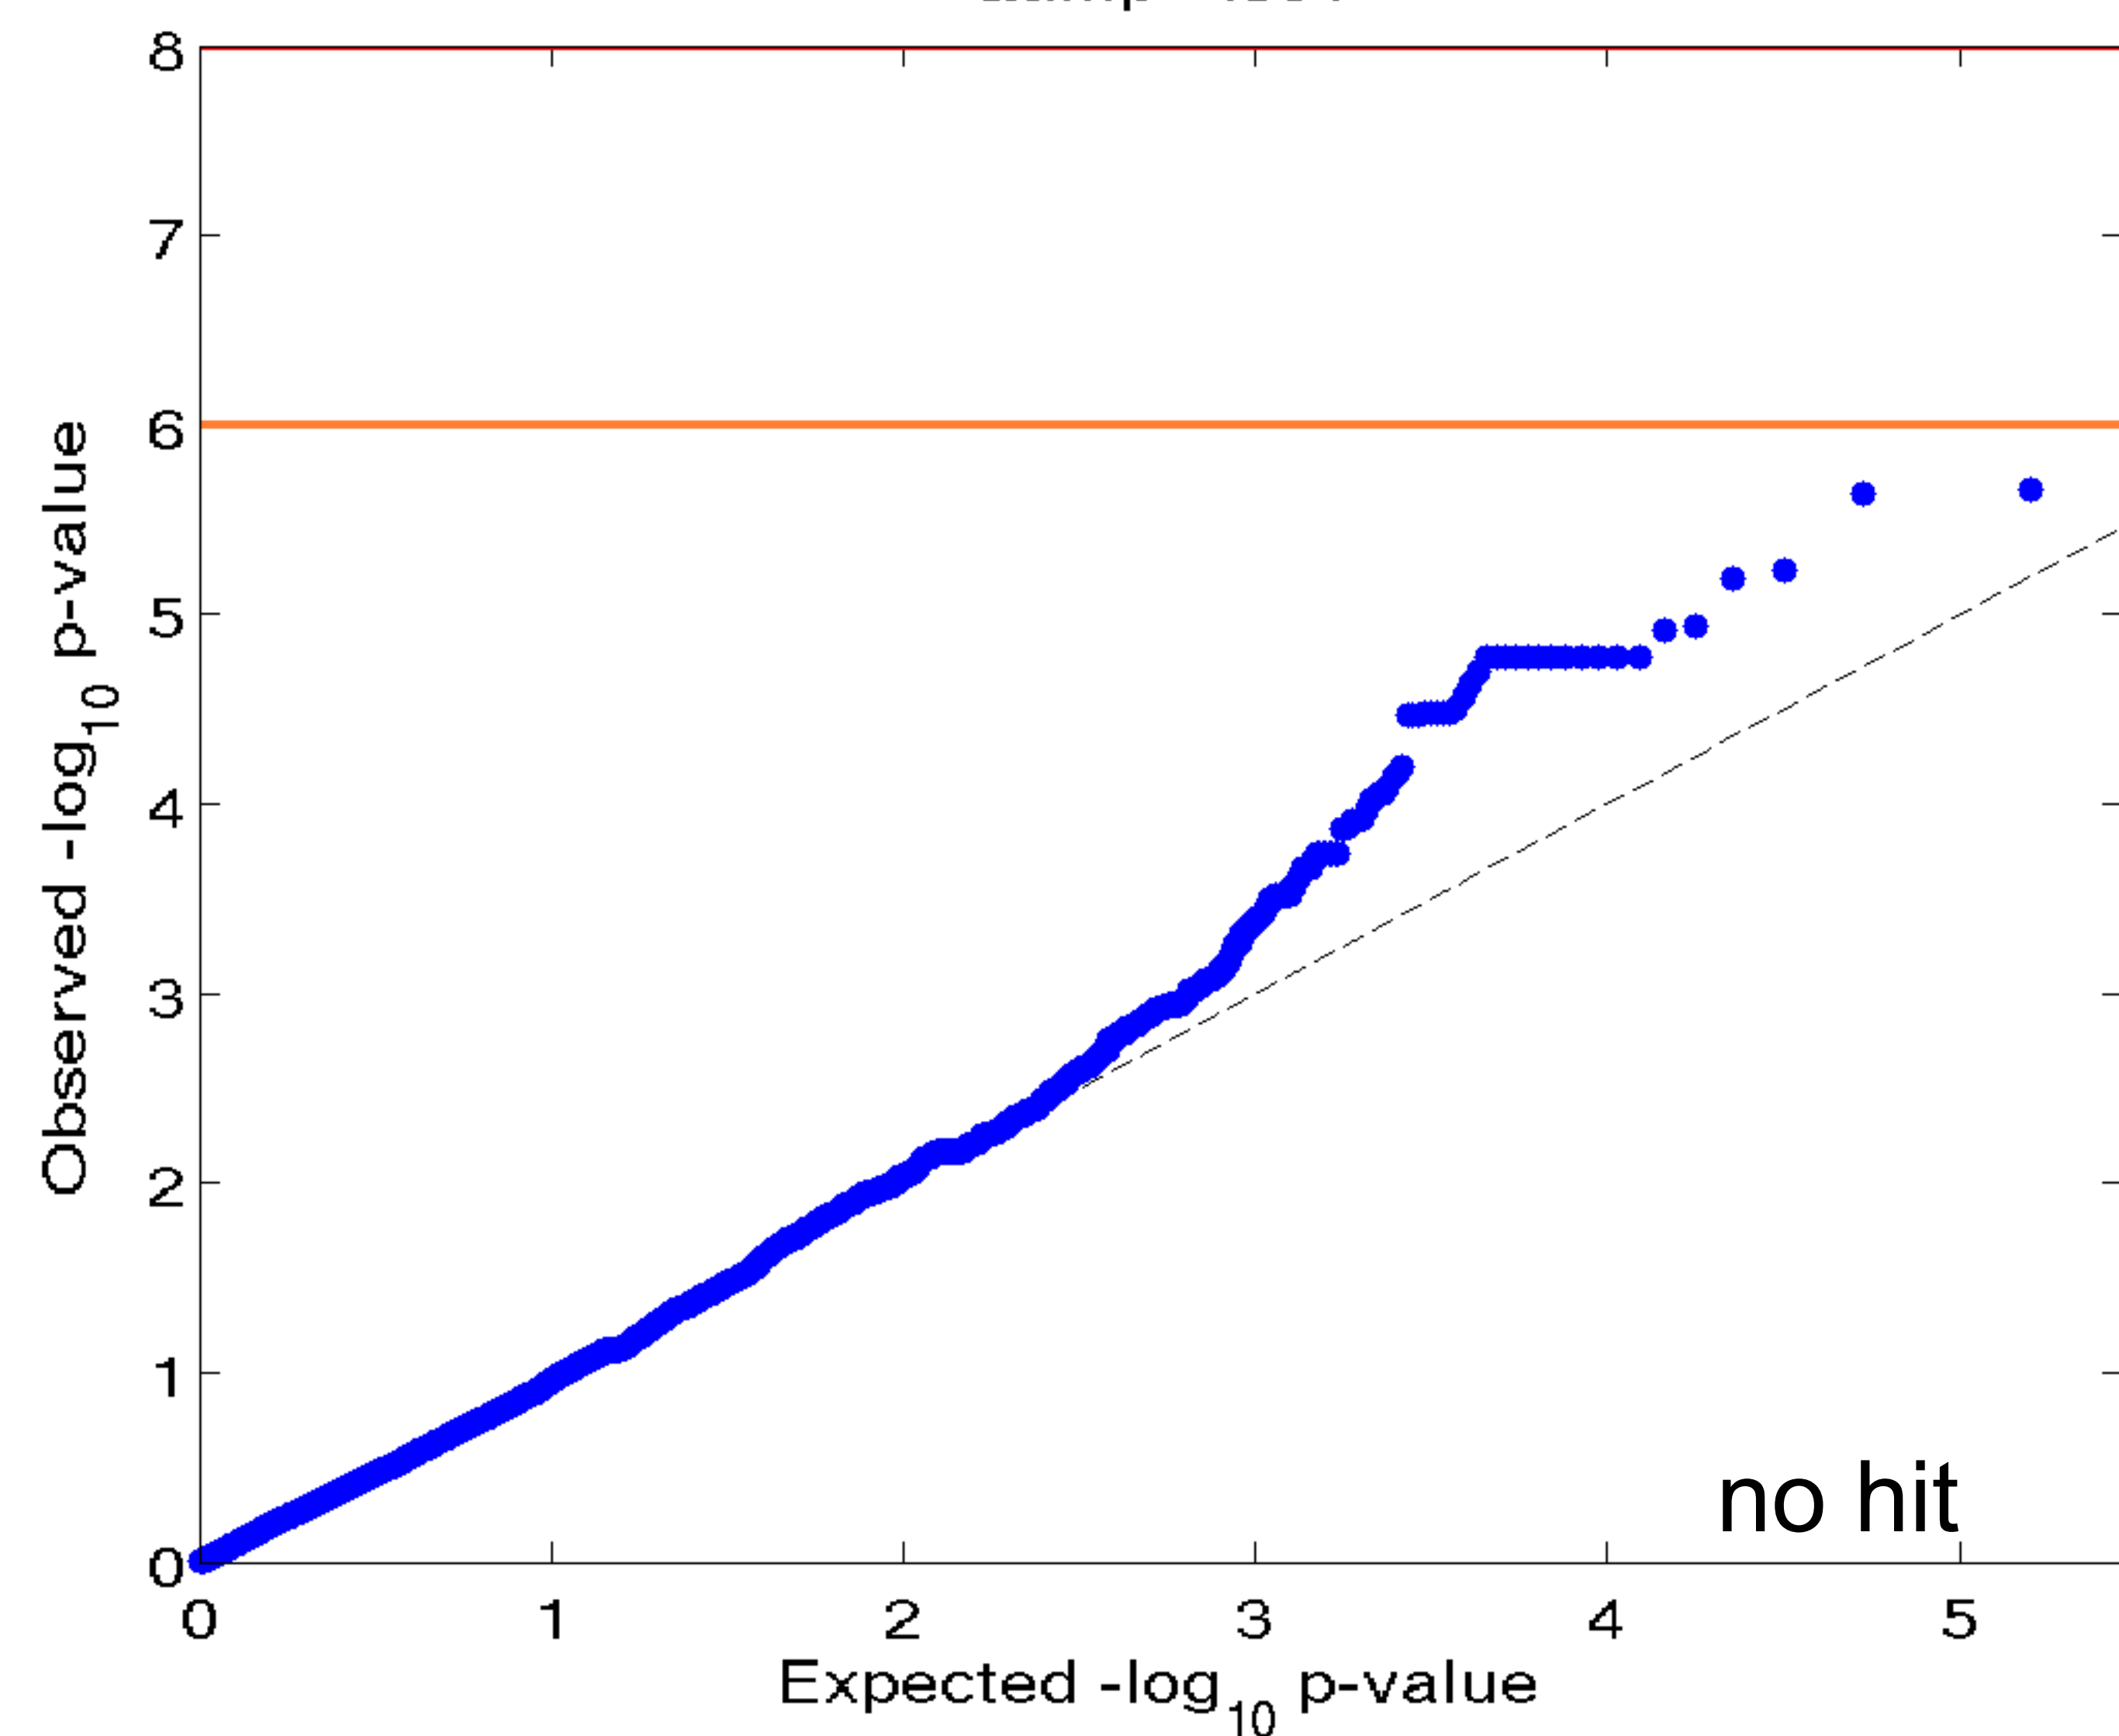

QRSarea - iso1

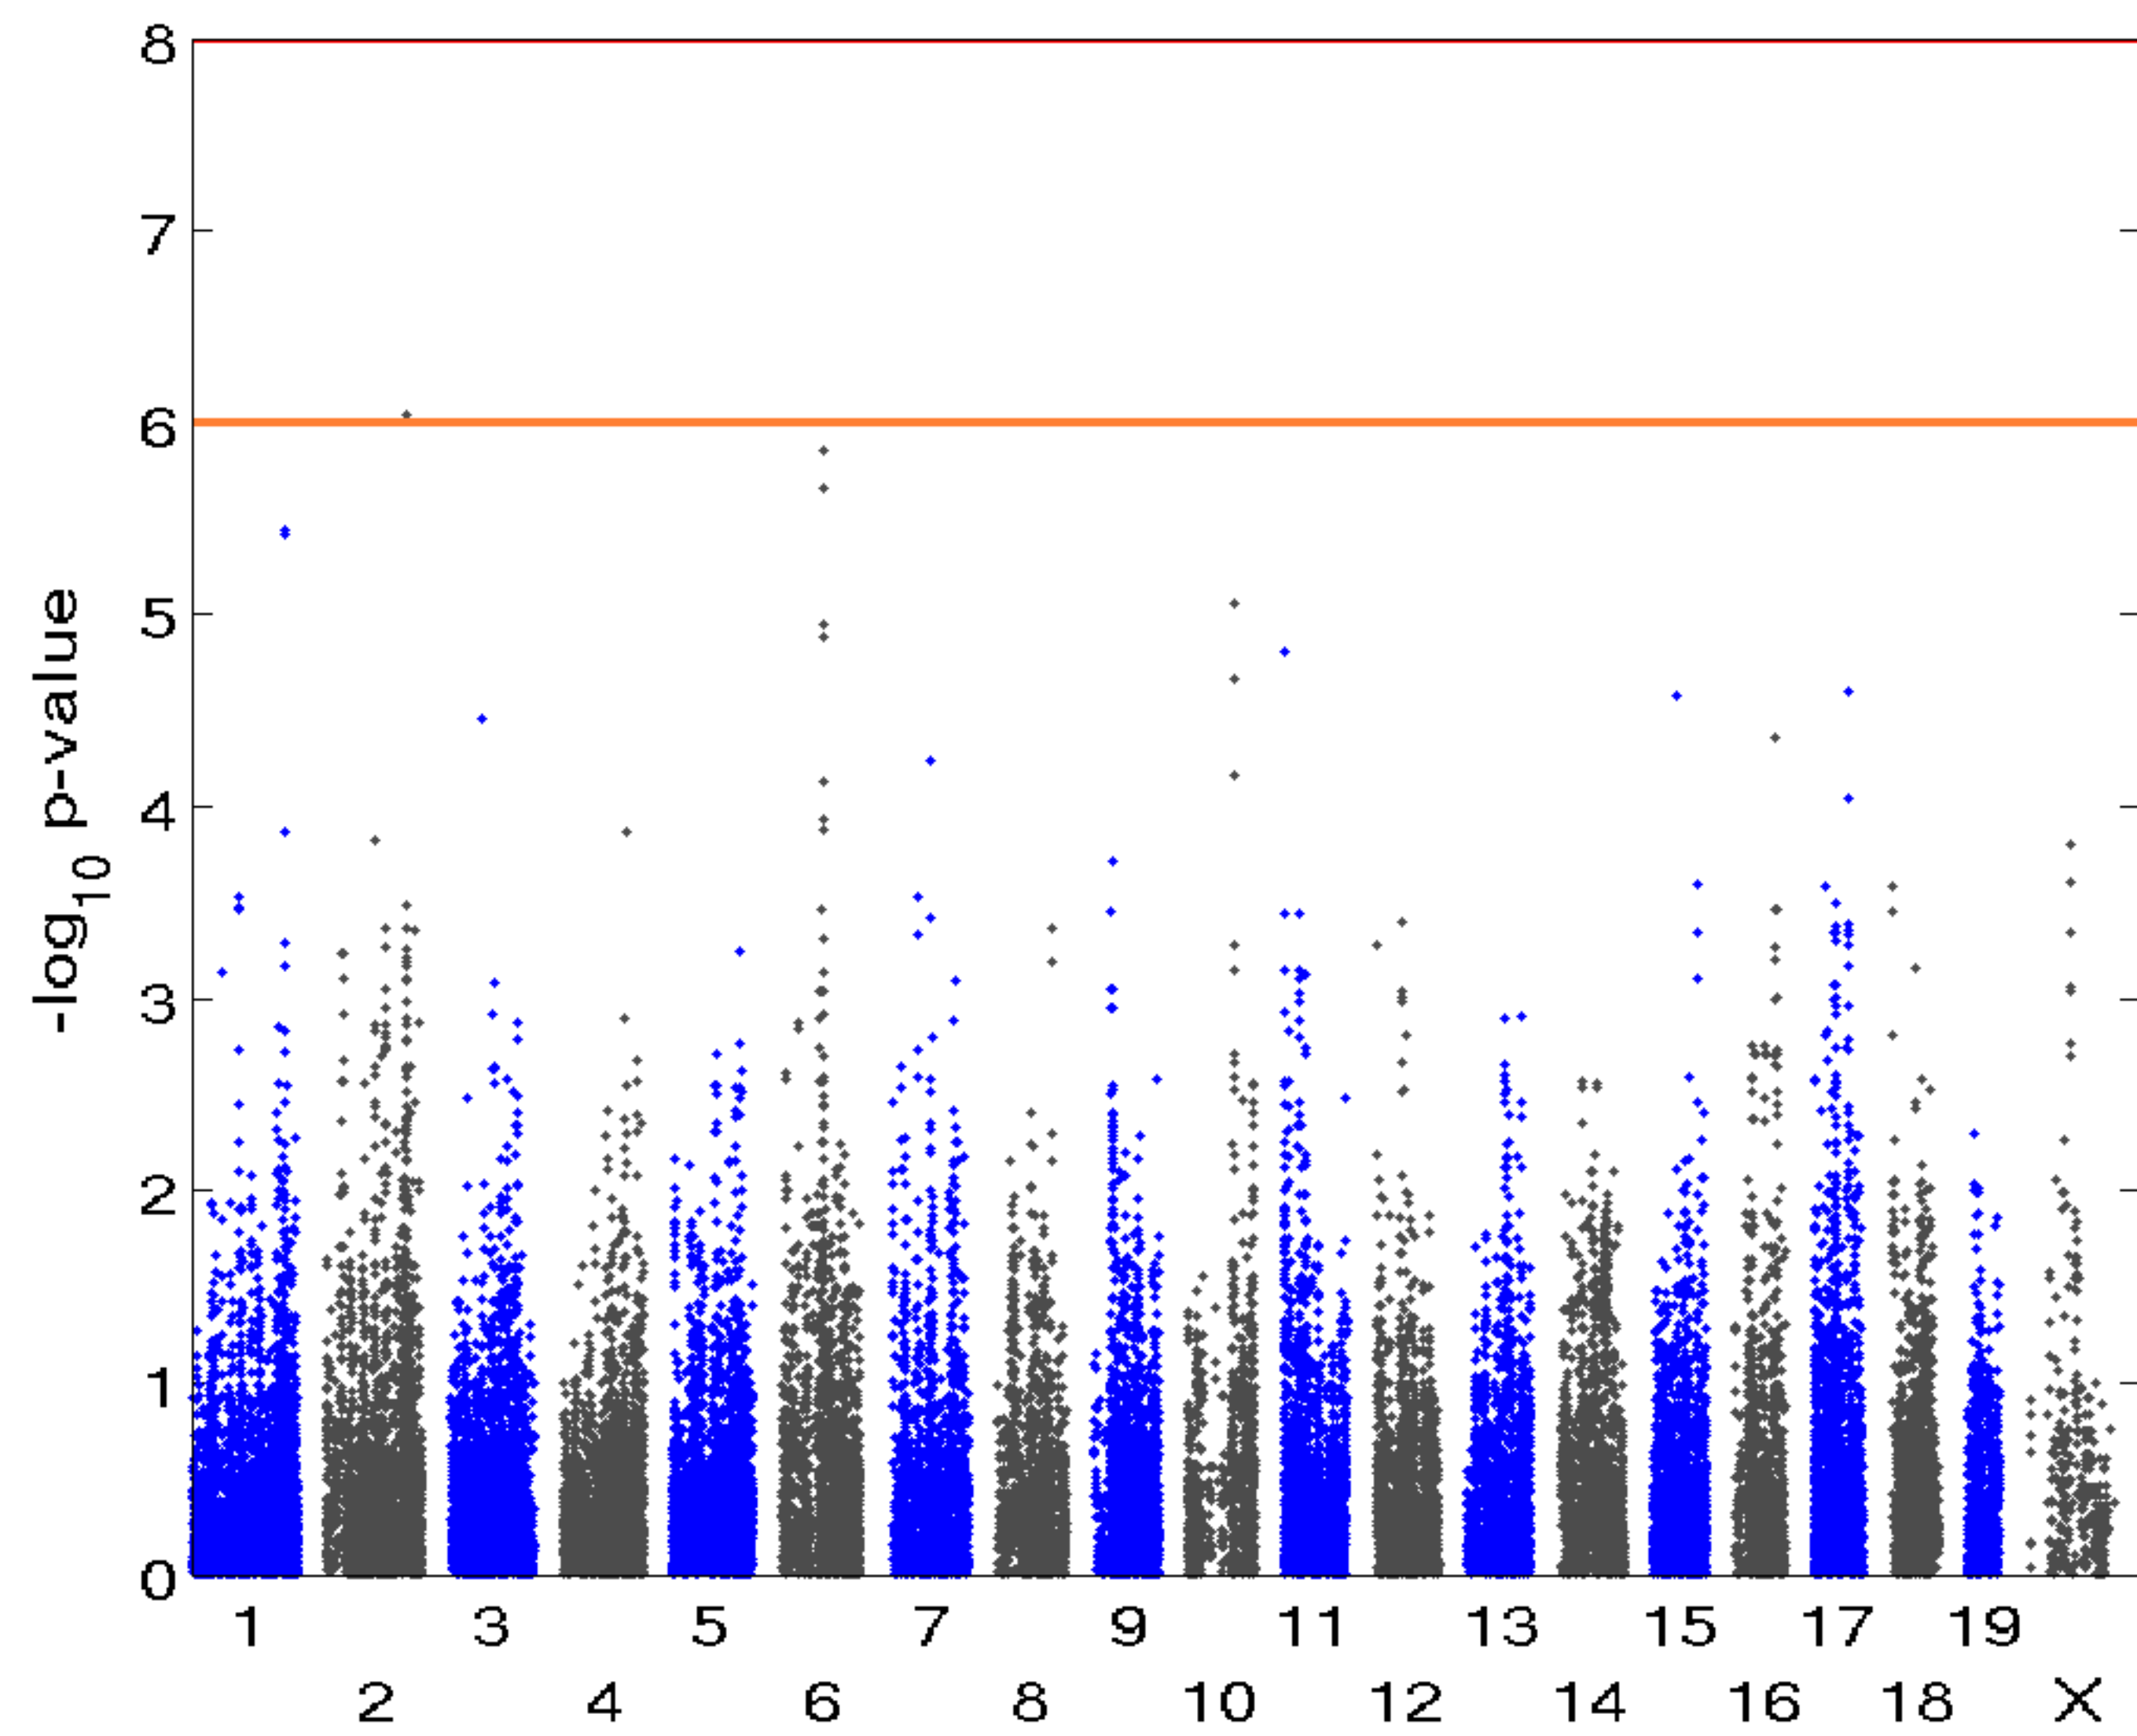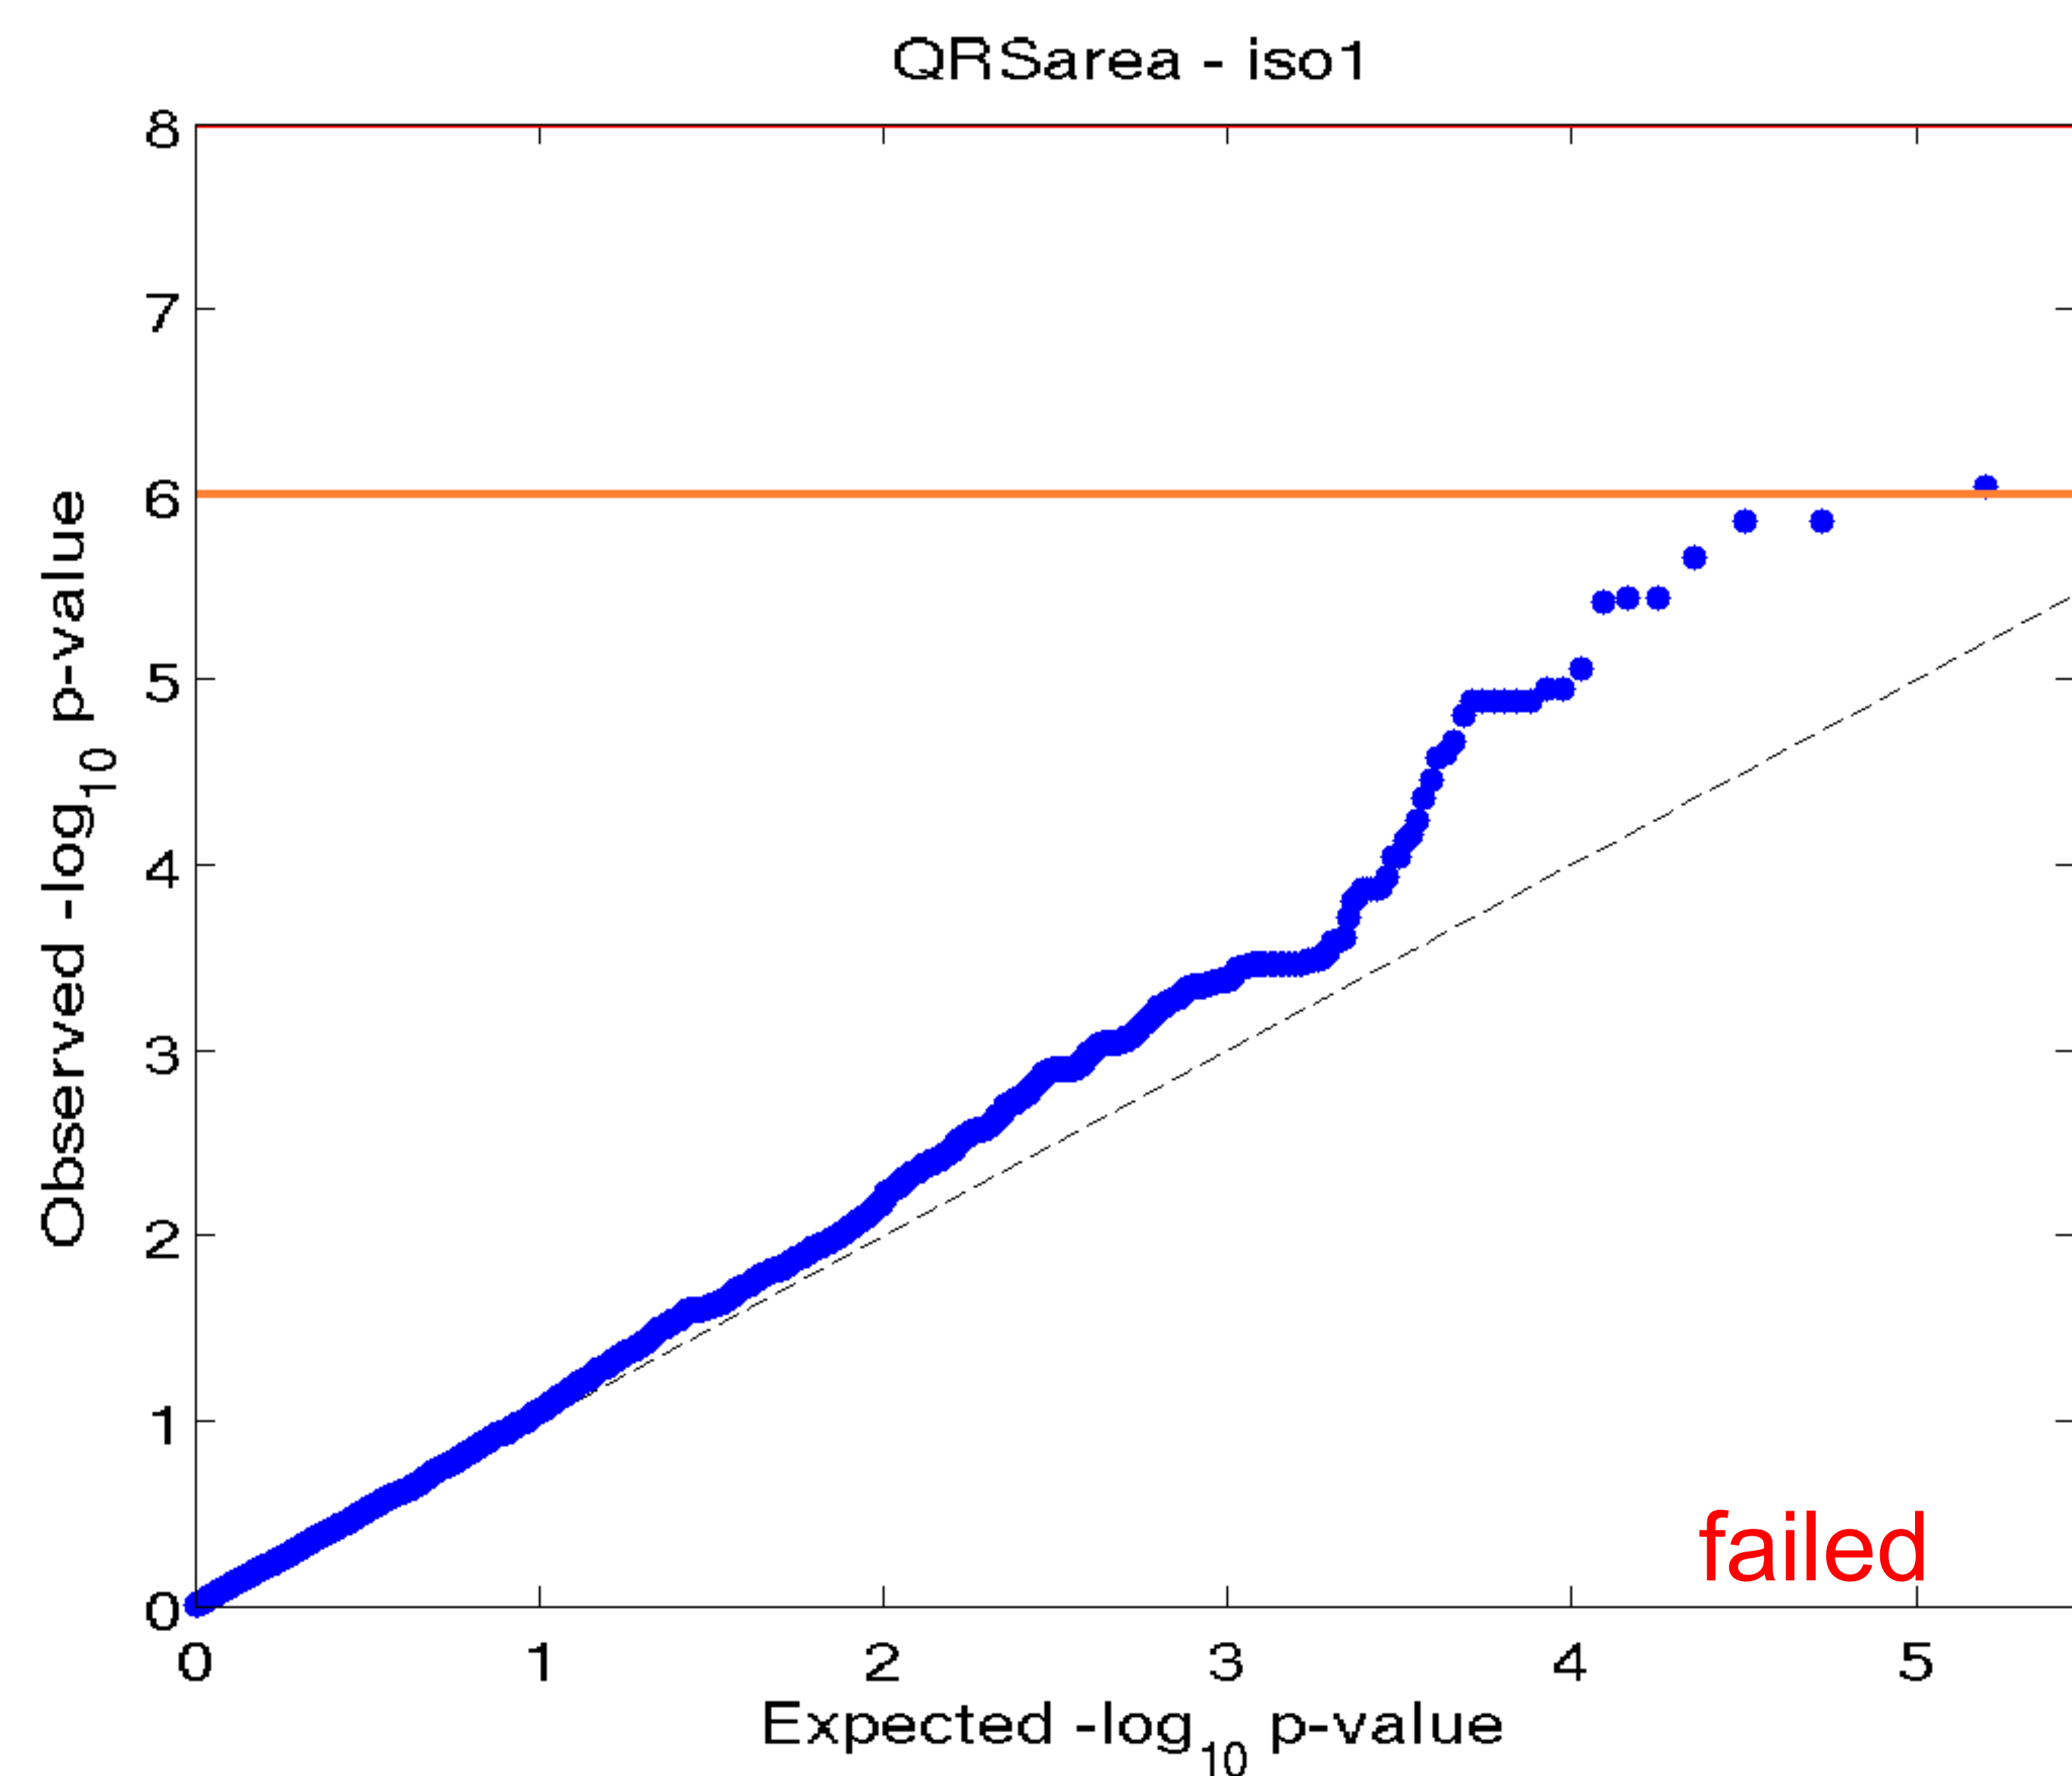

QRS - iso1

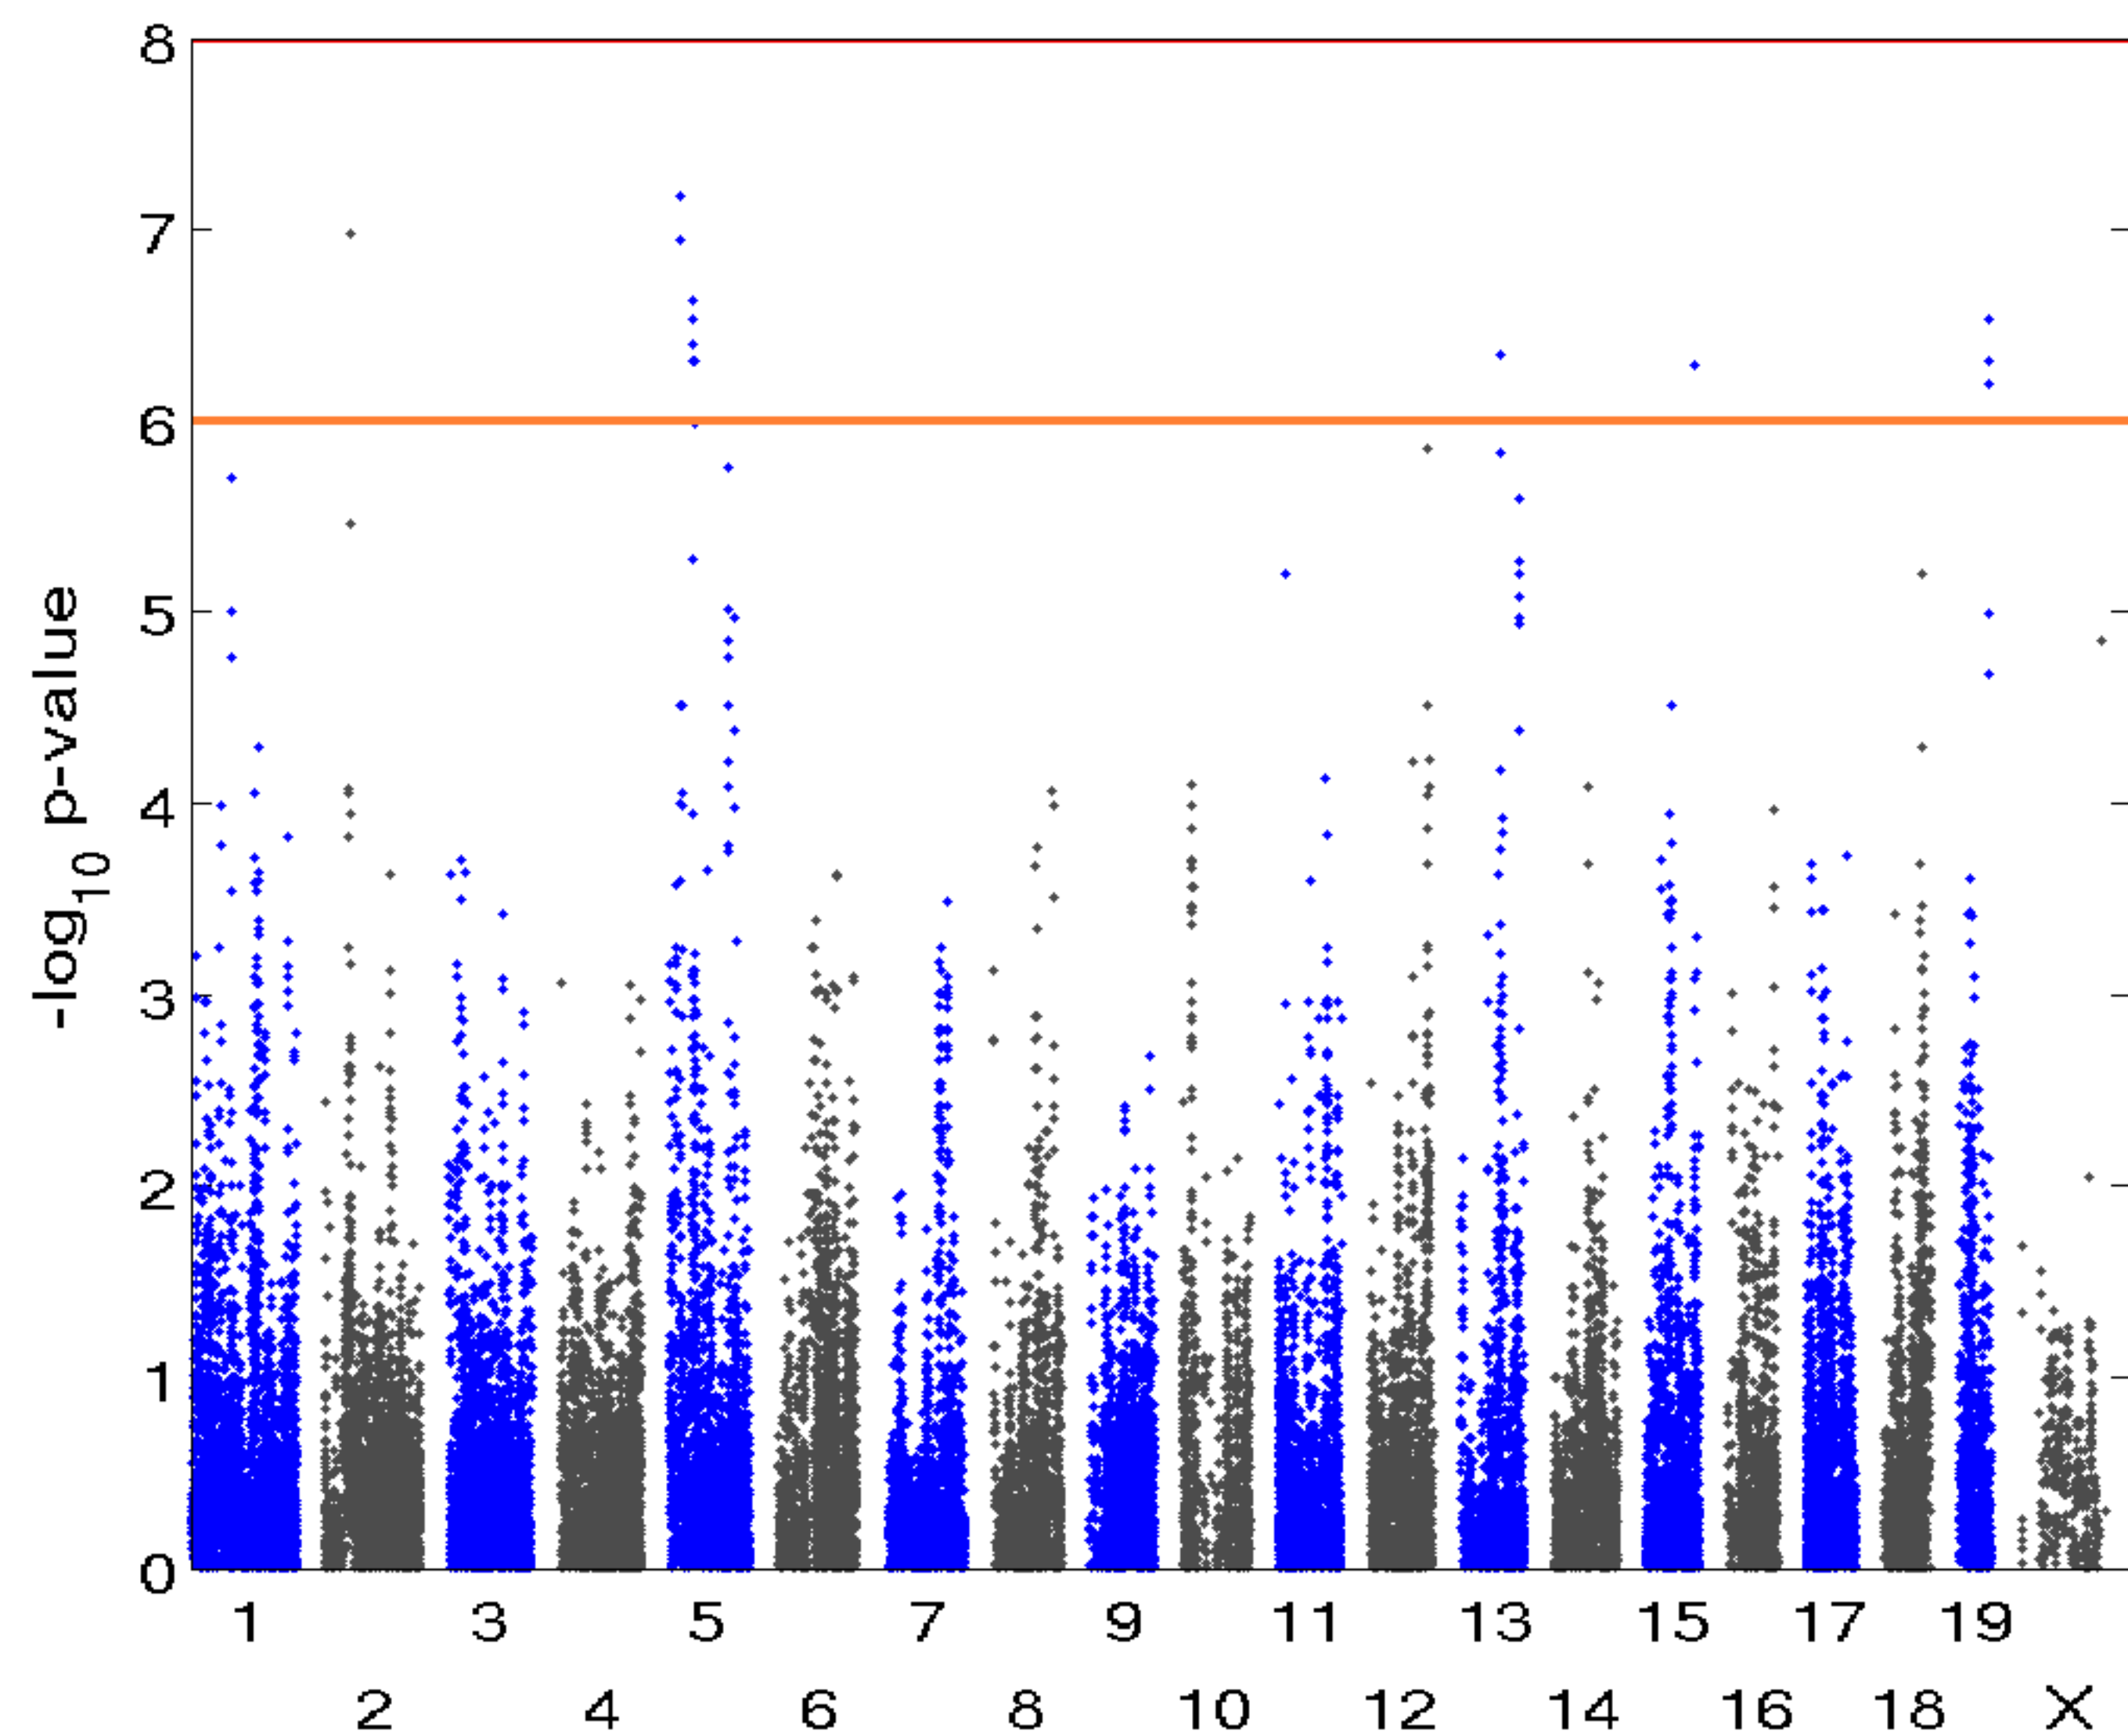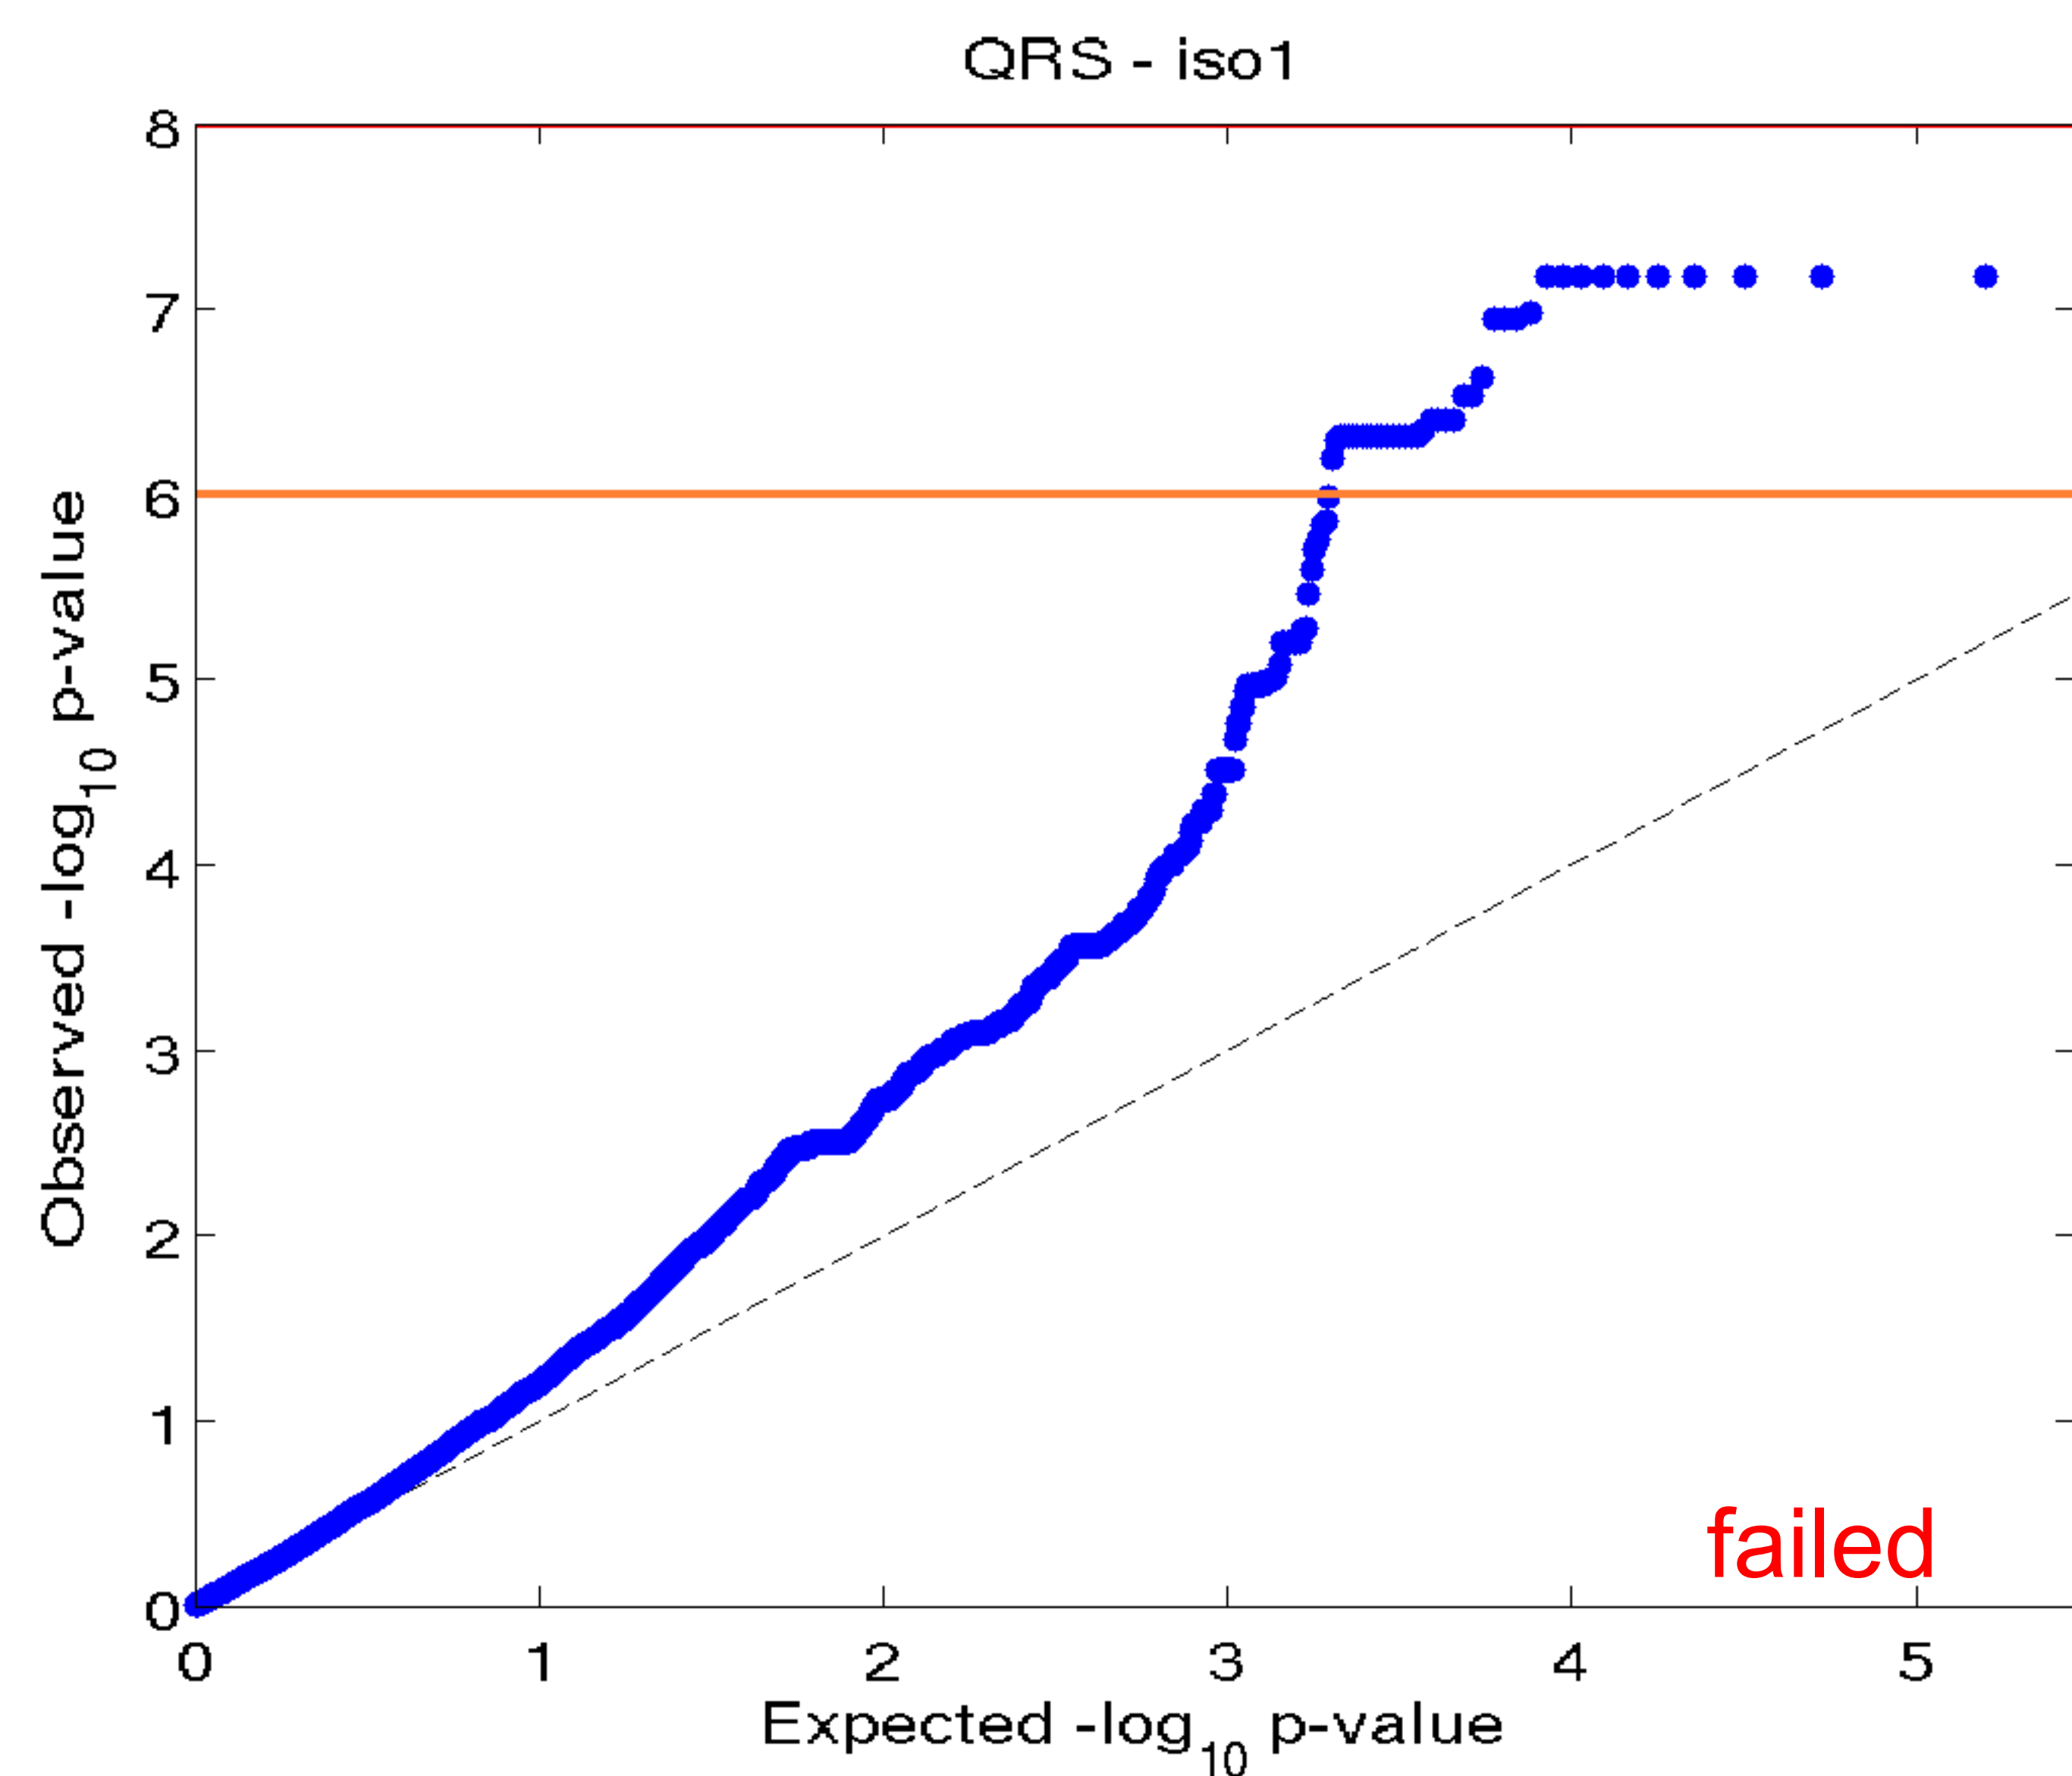

QTc - iso1

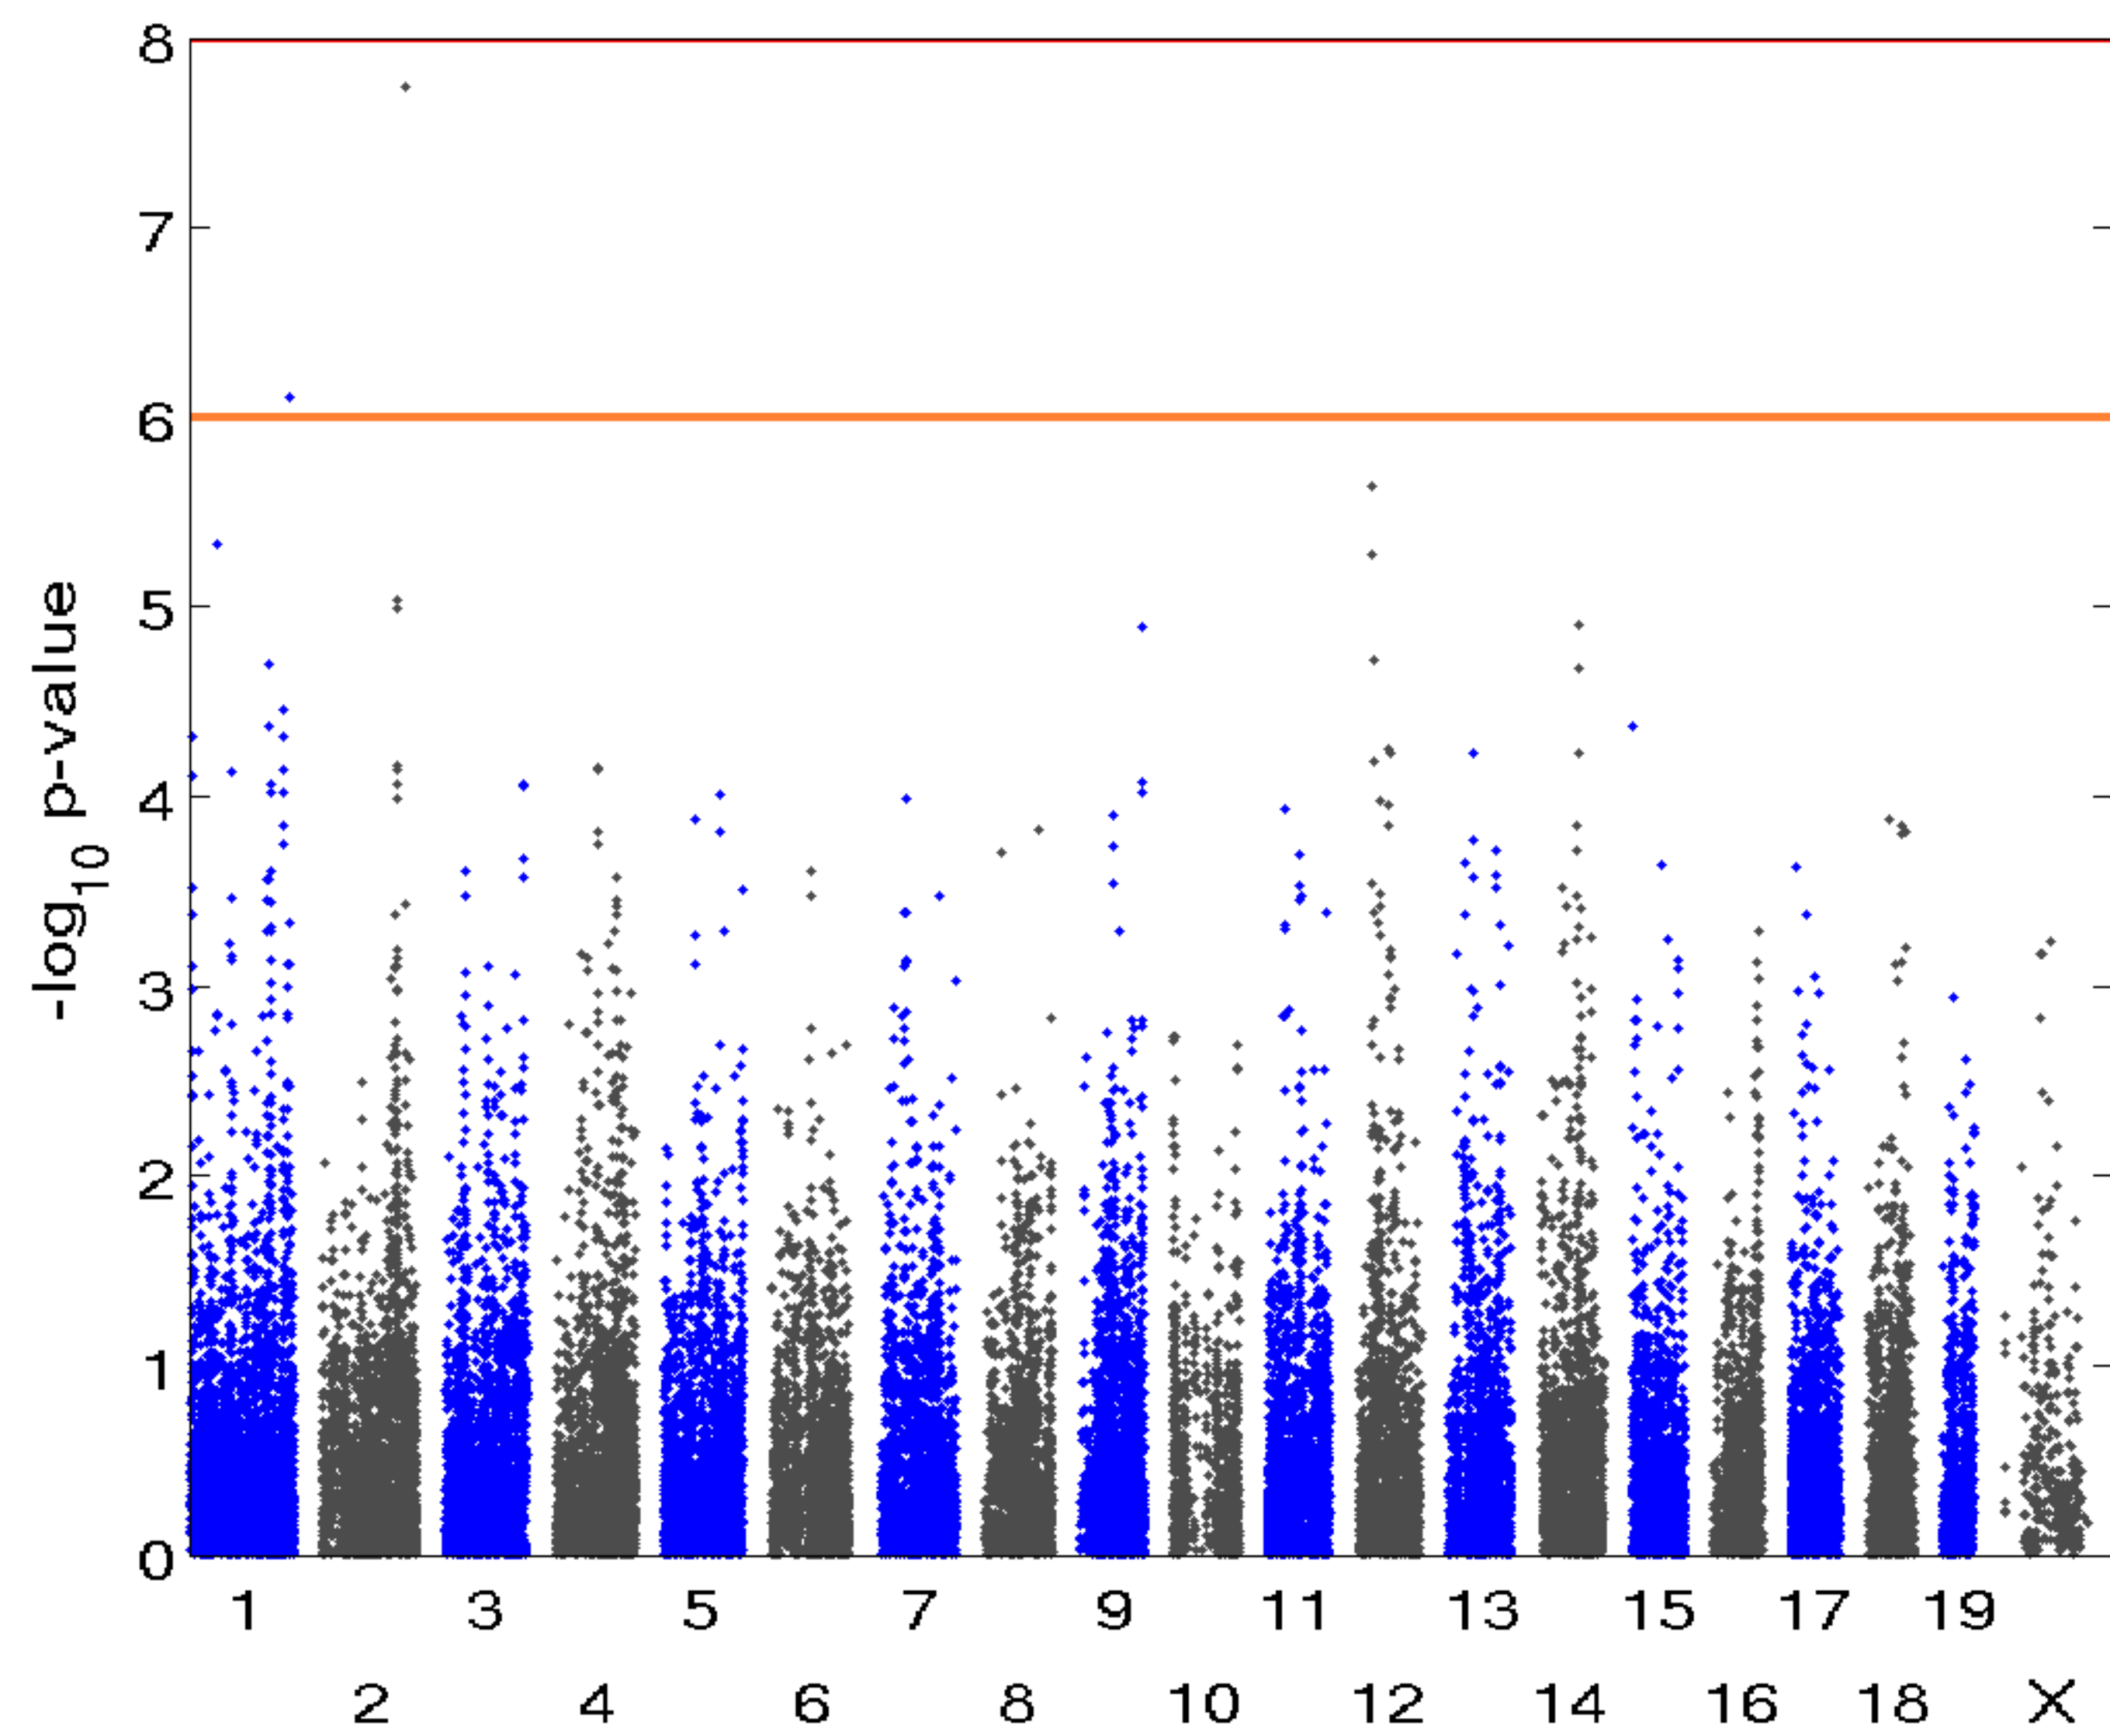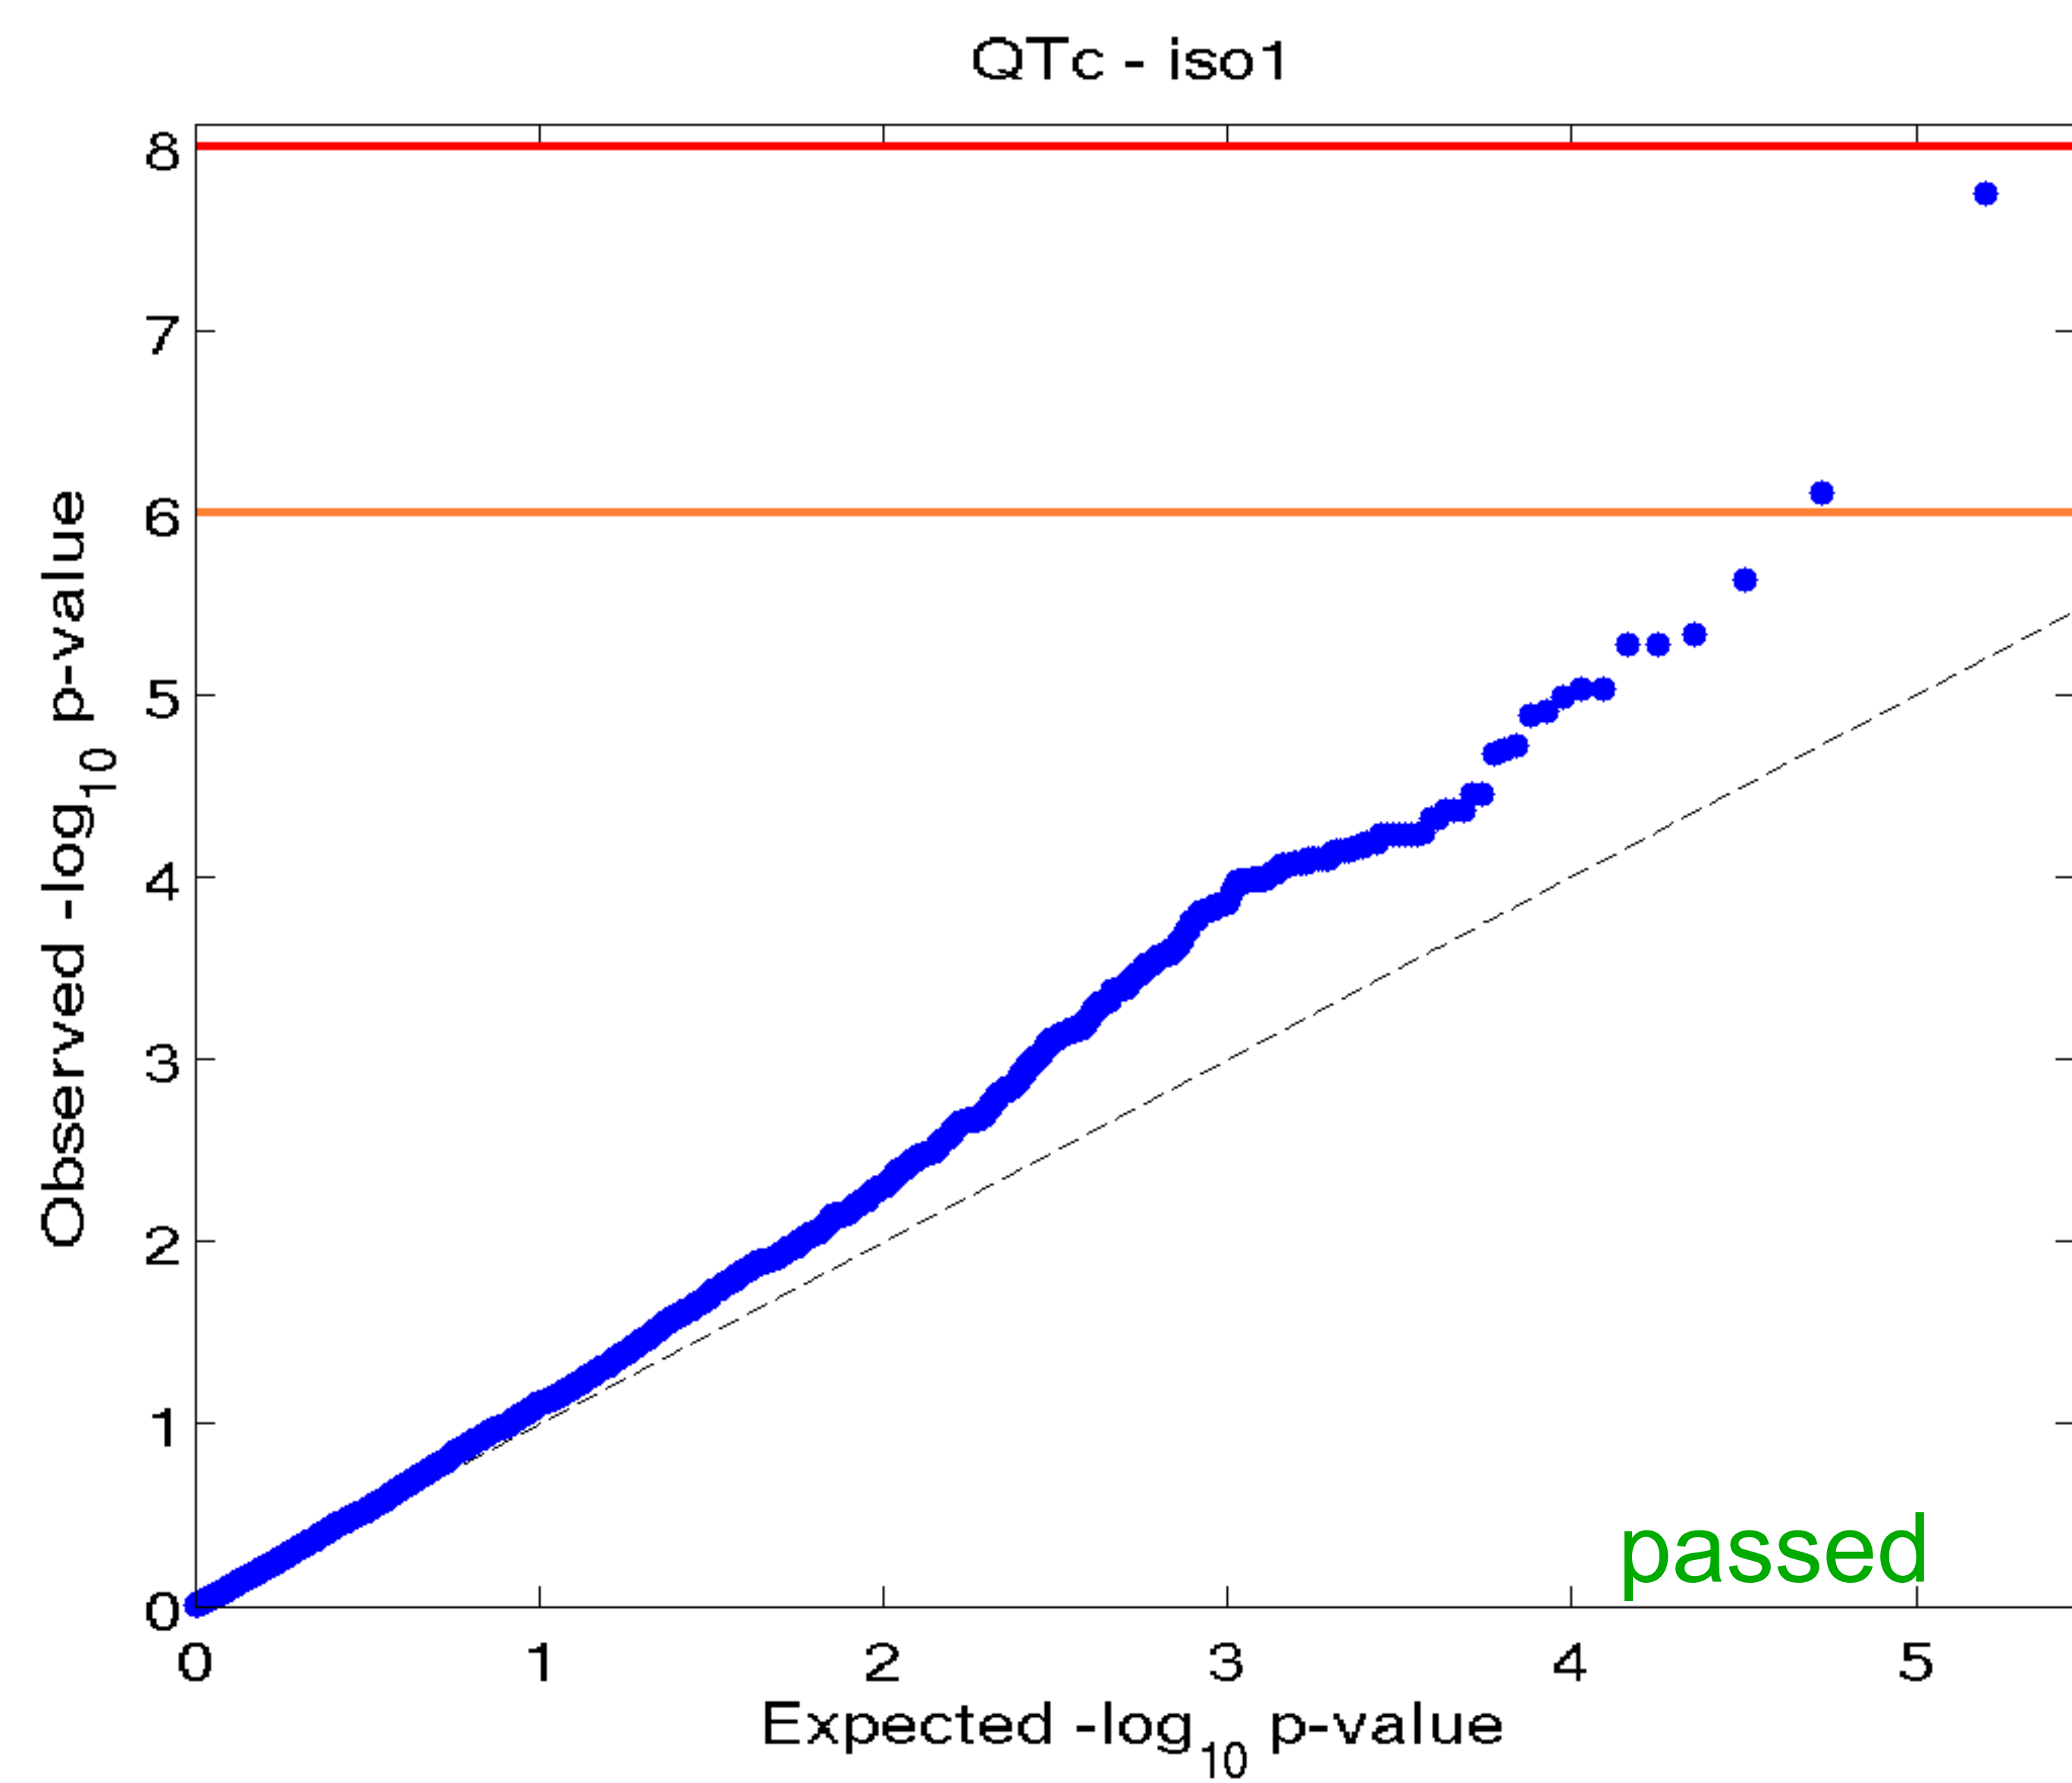



QT - iso1

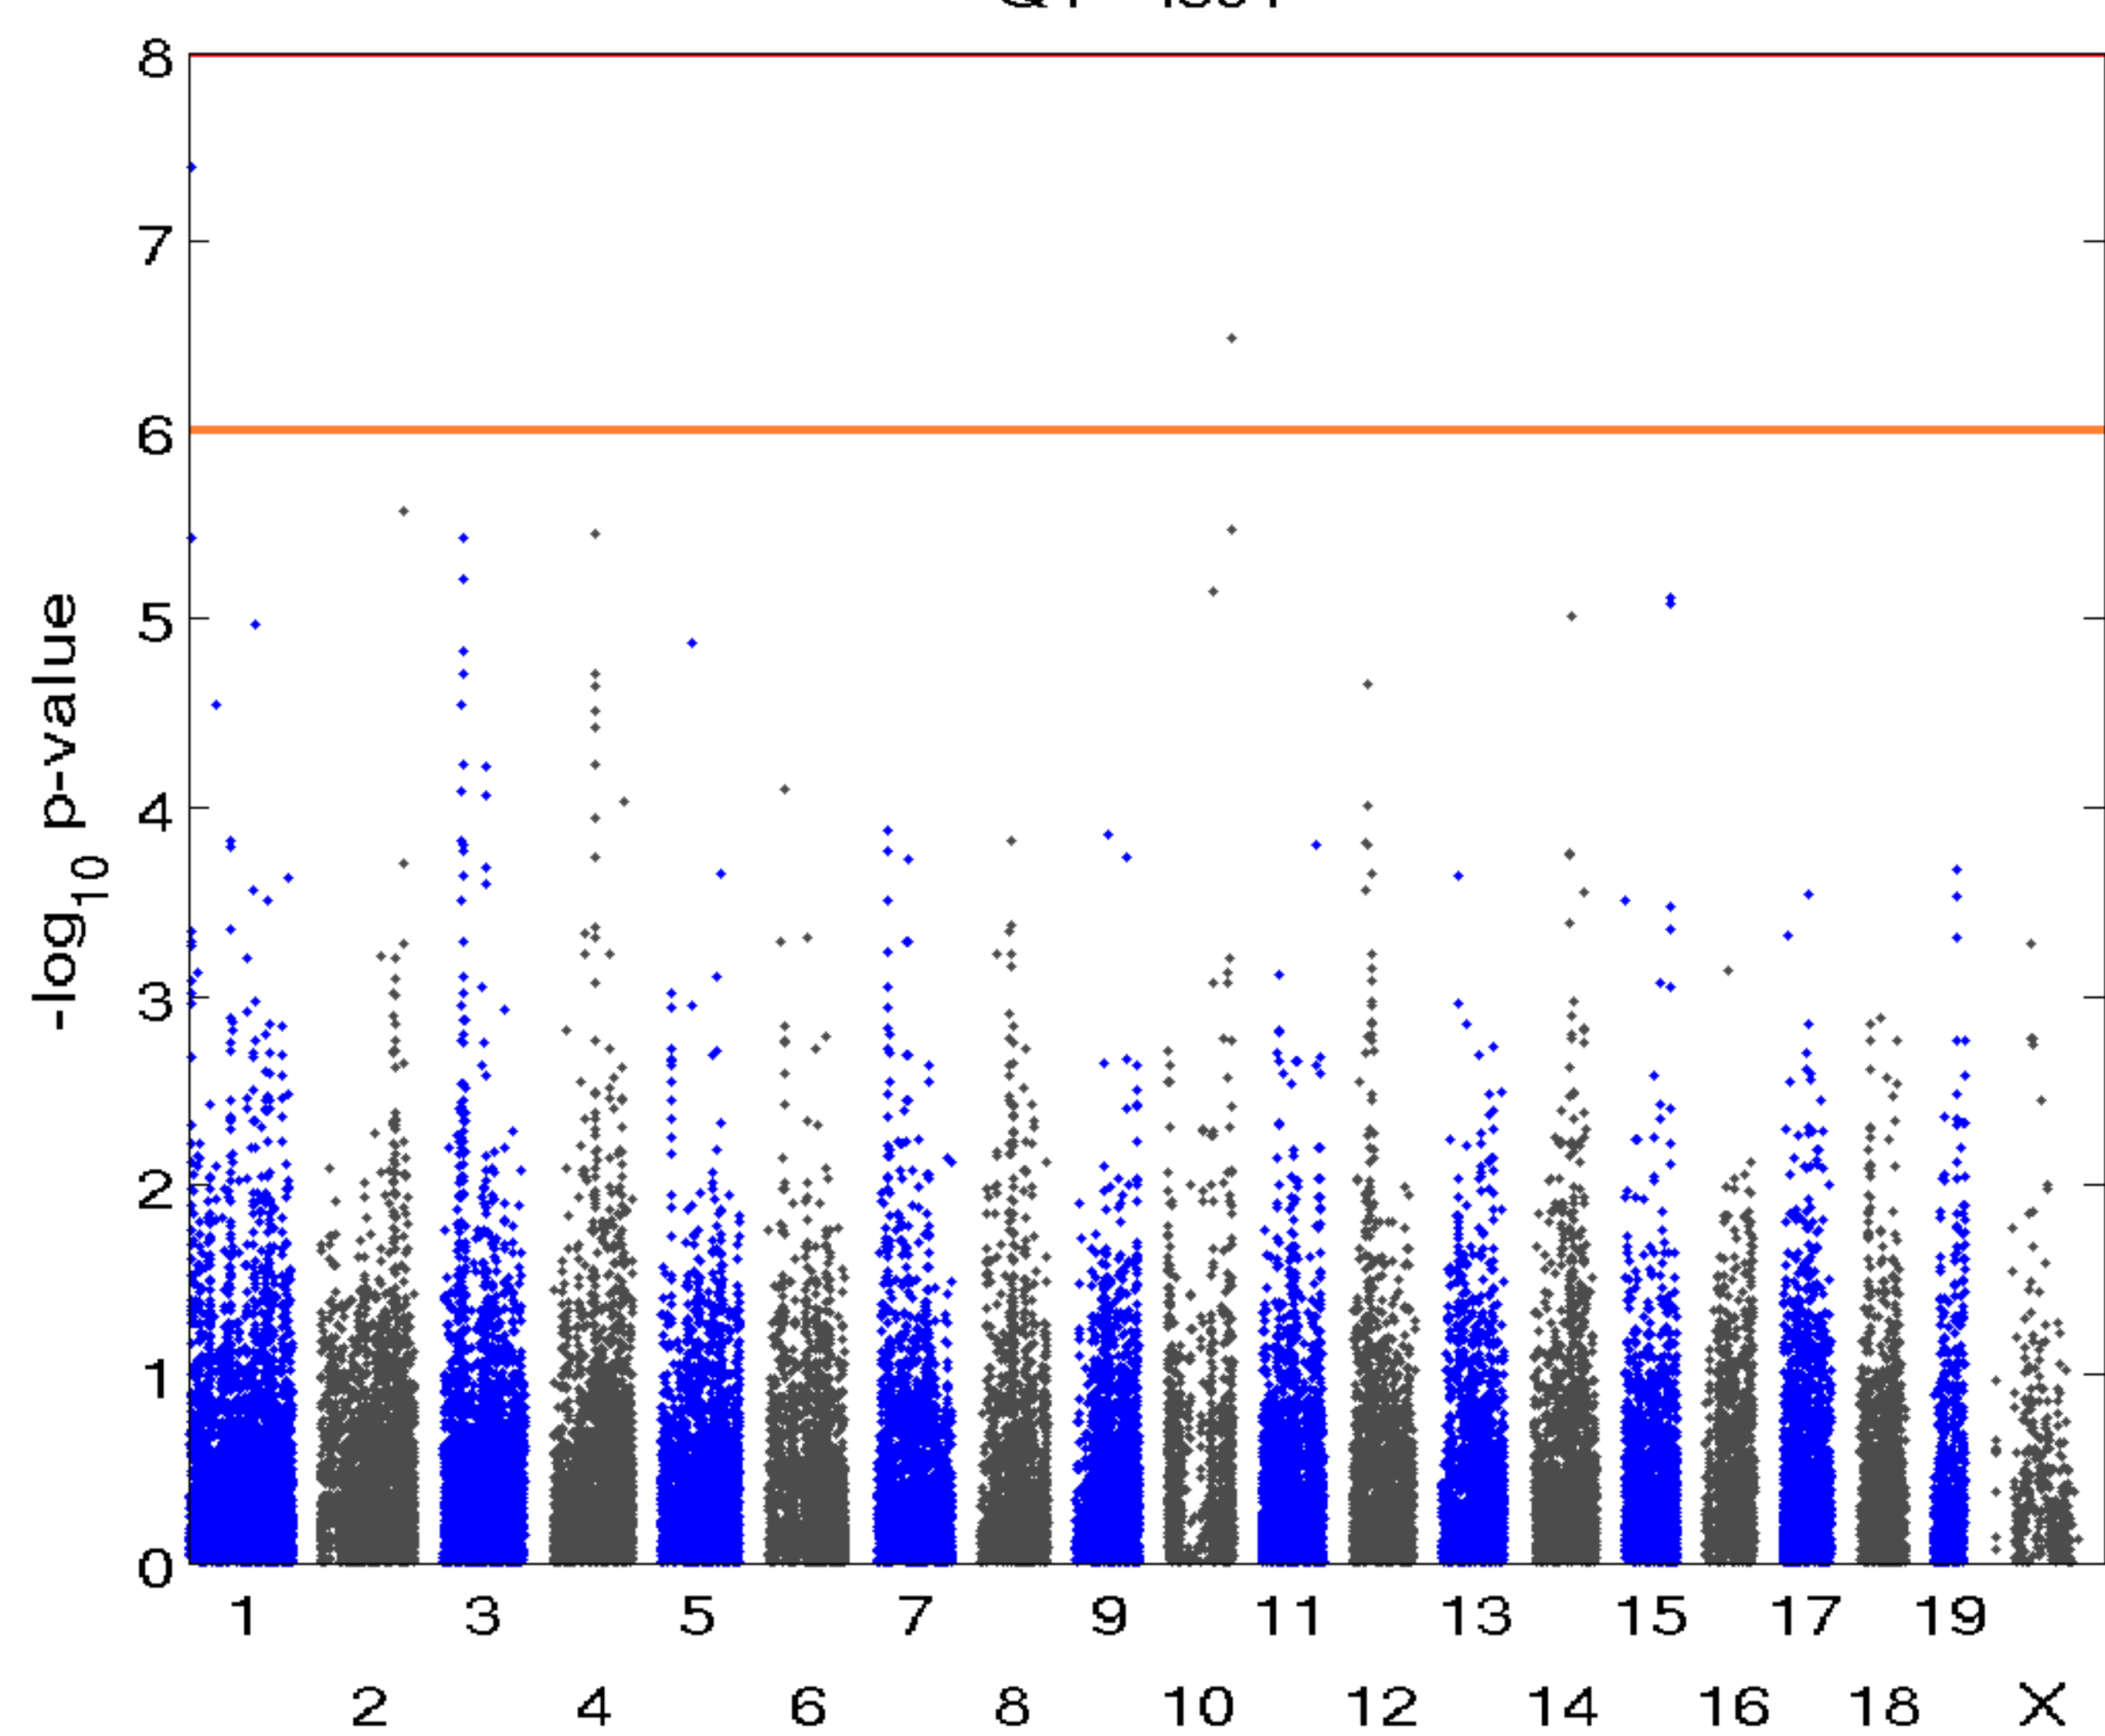

QT - iso1

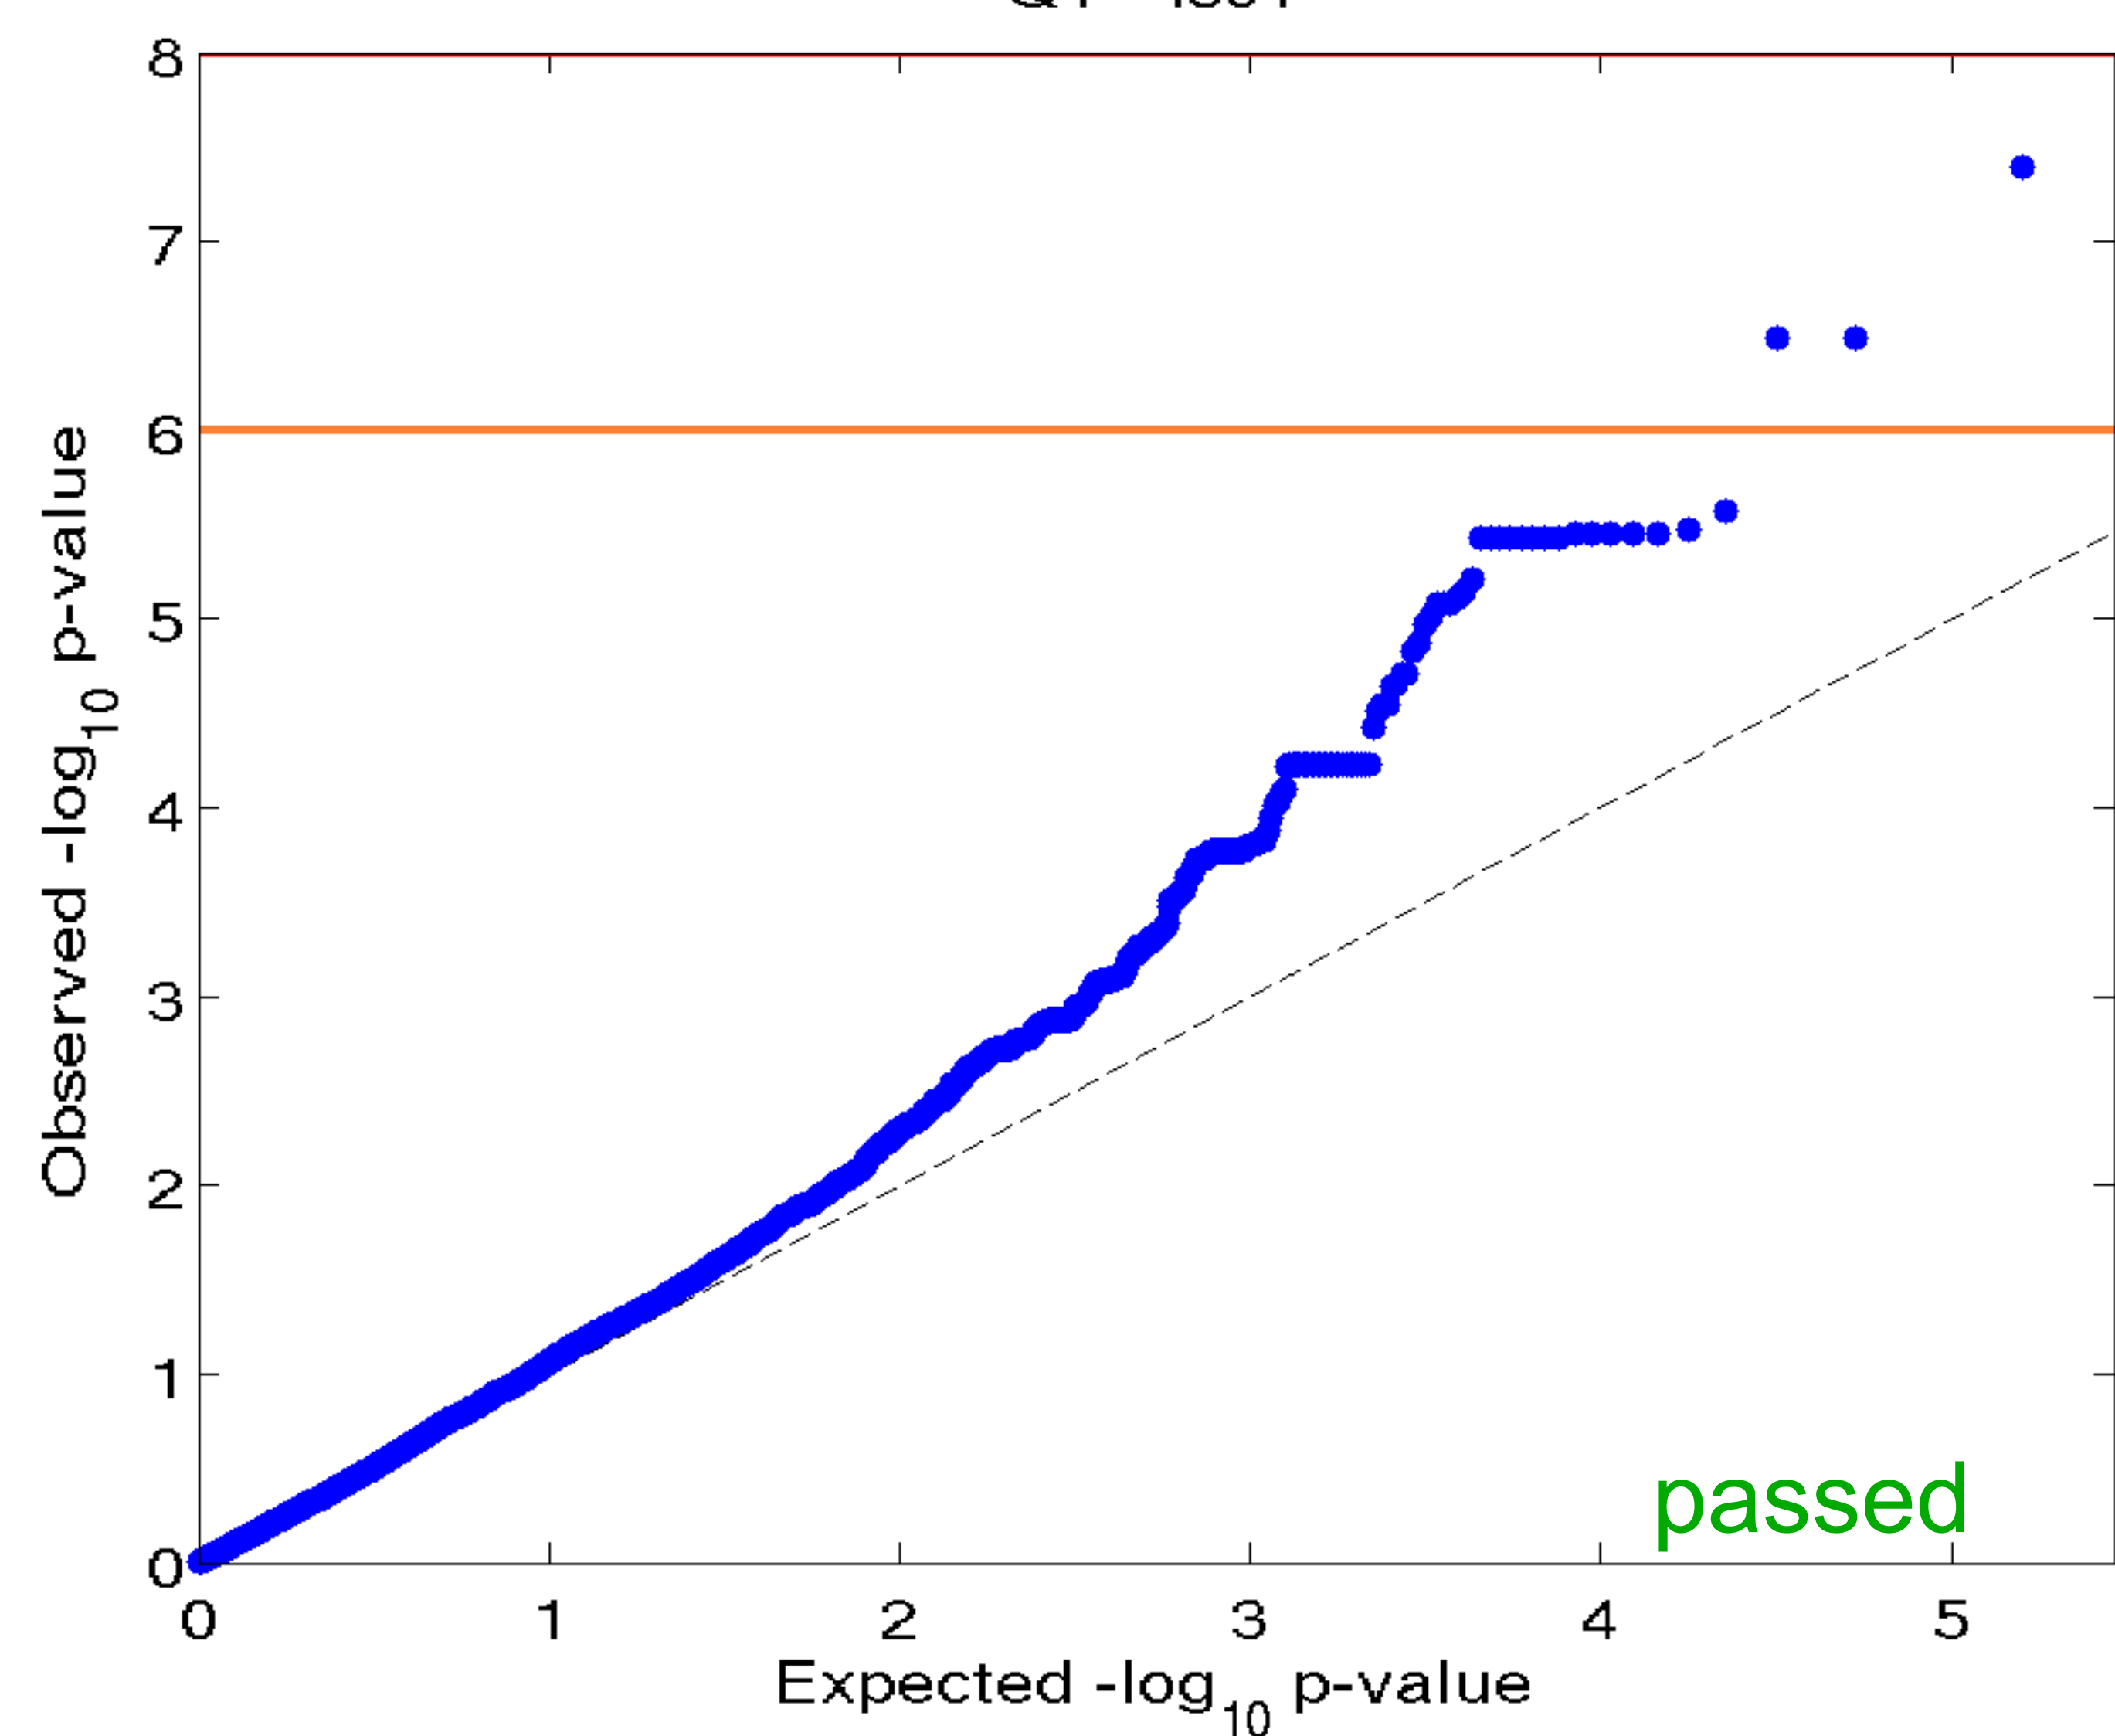

Ramp - iso1

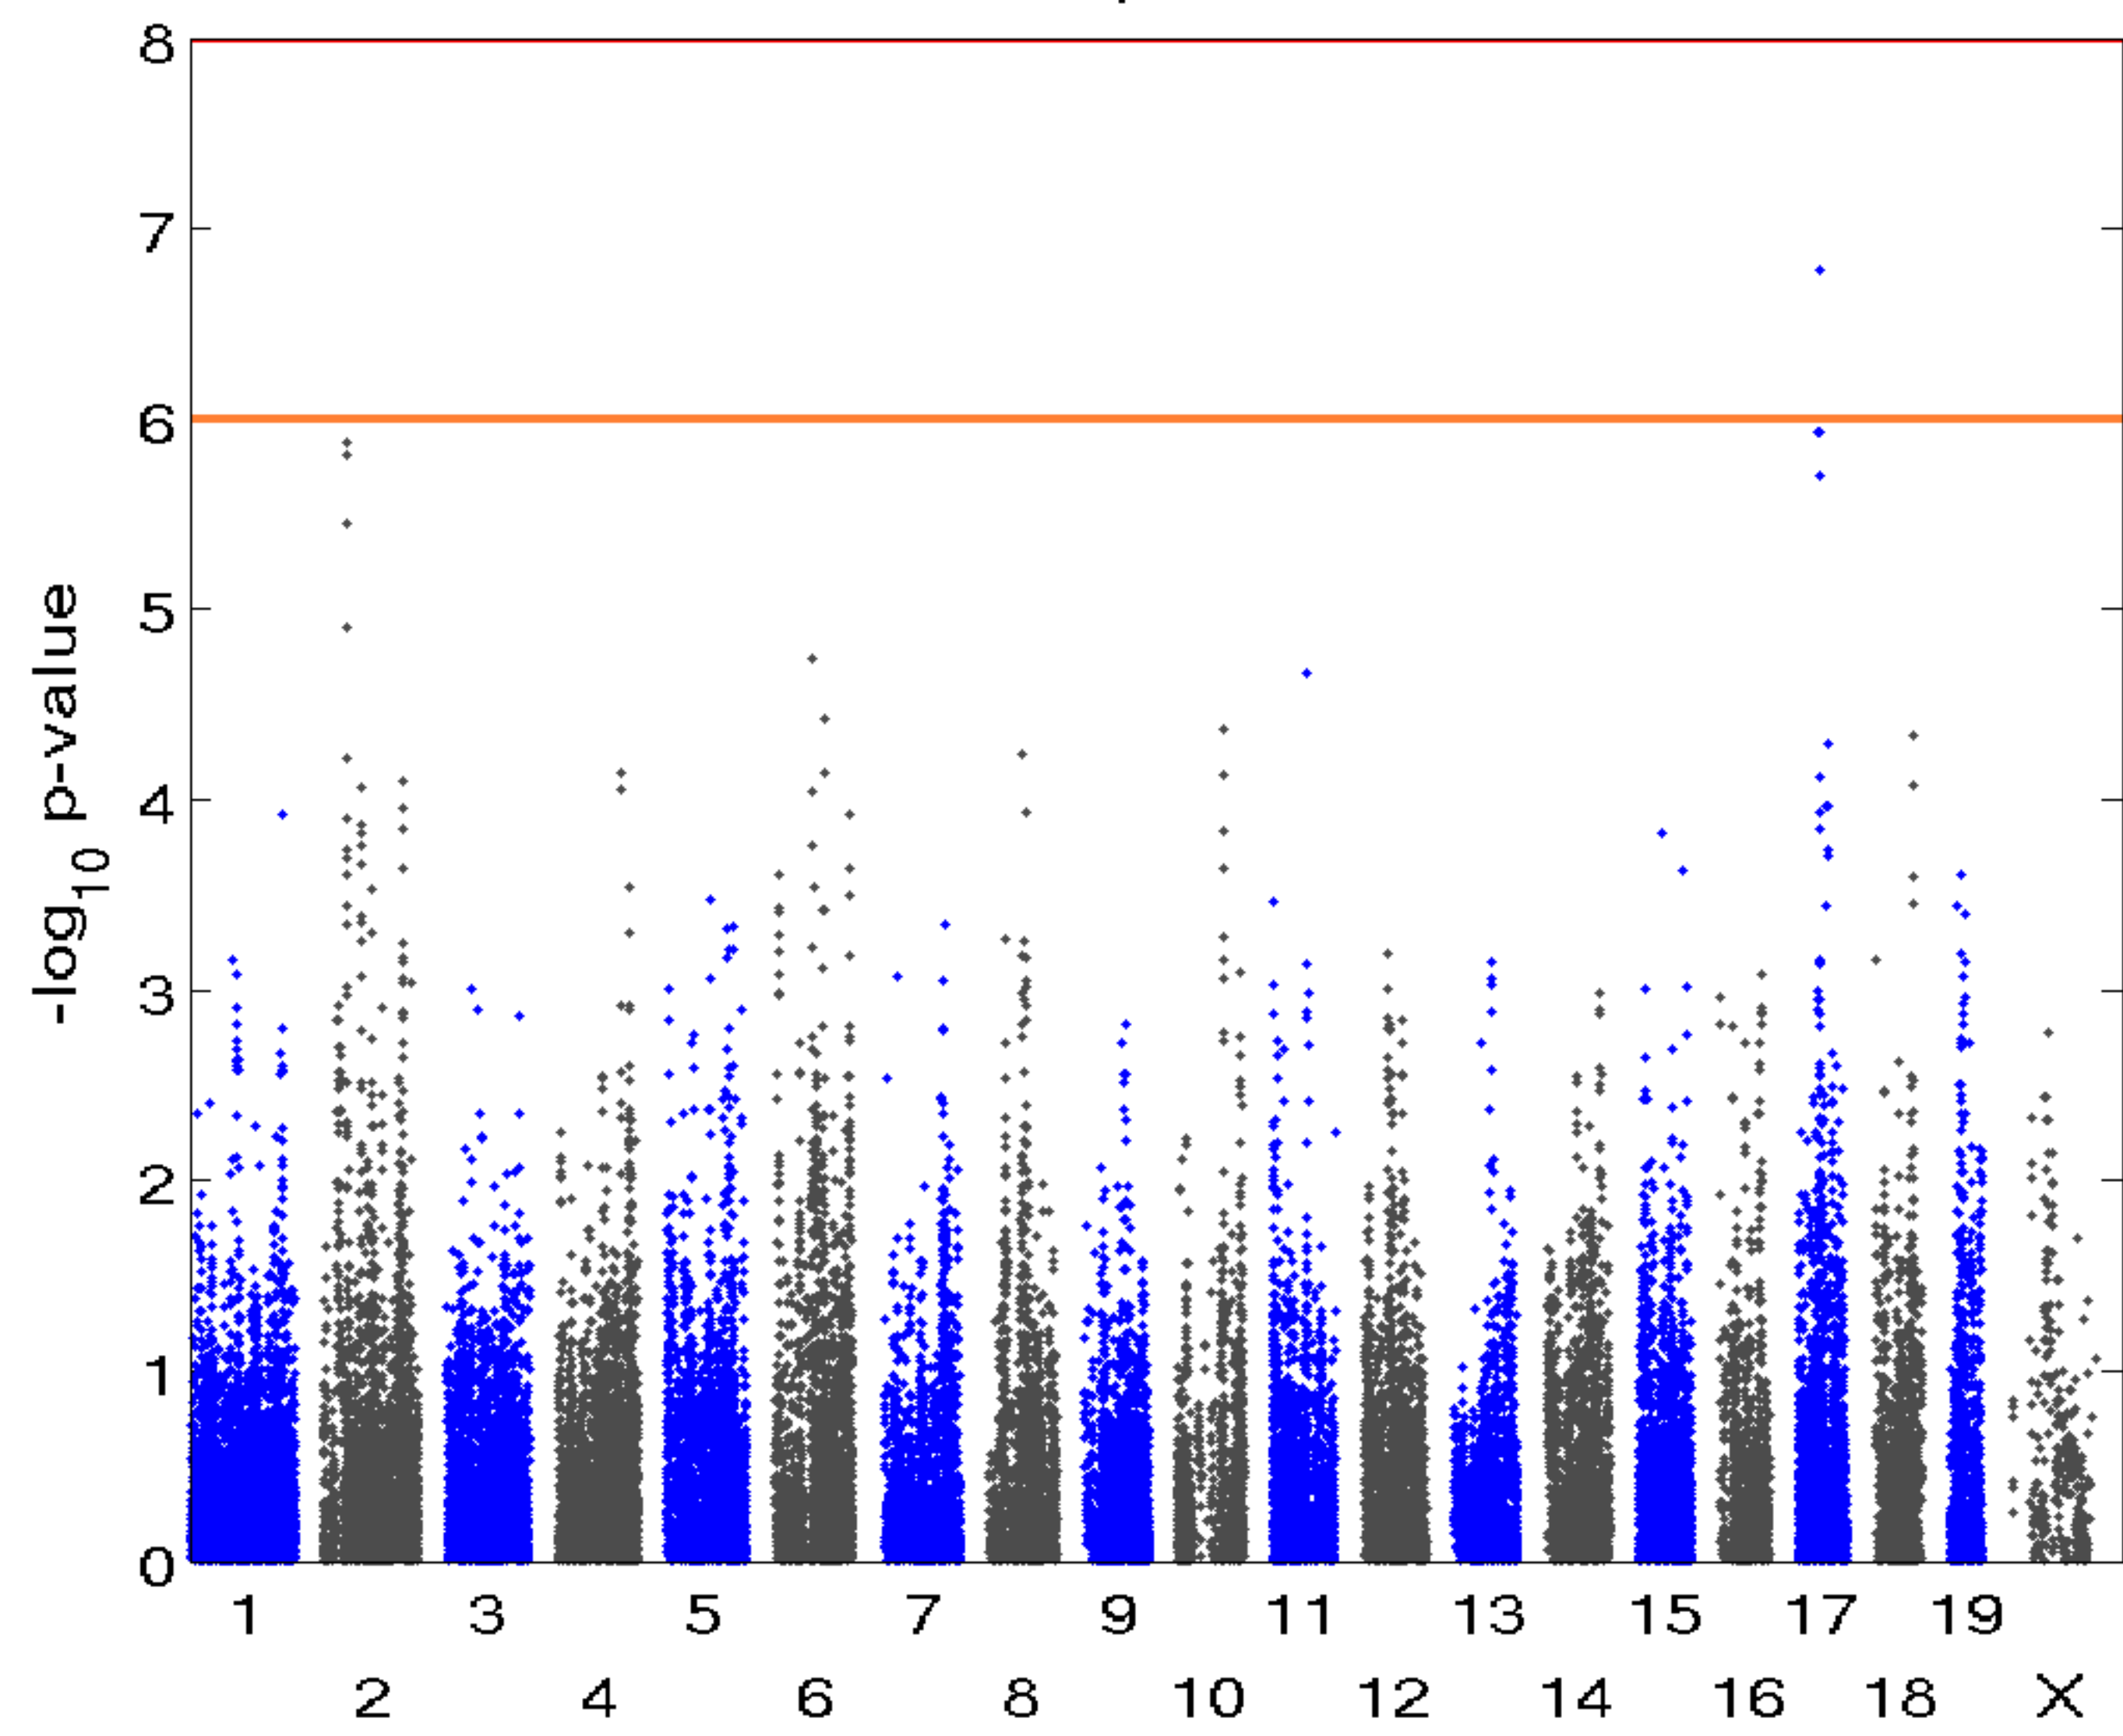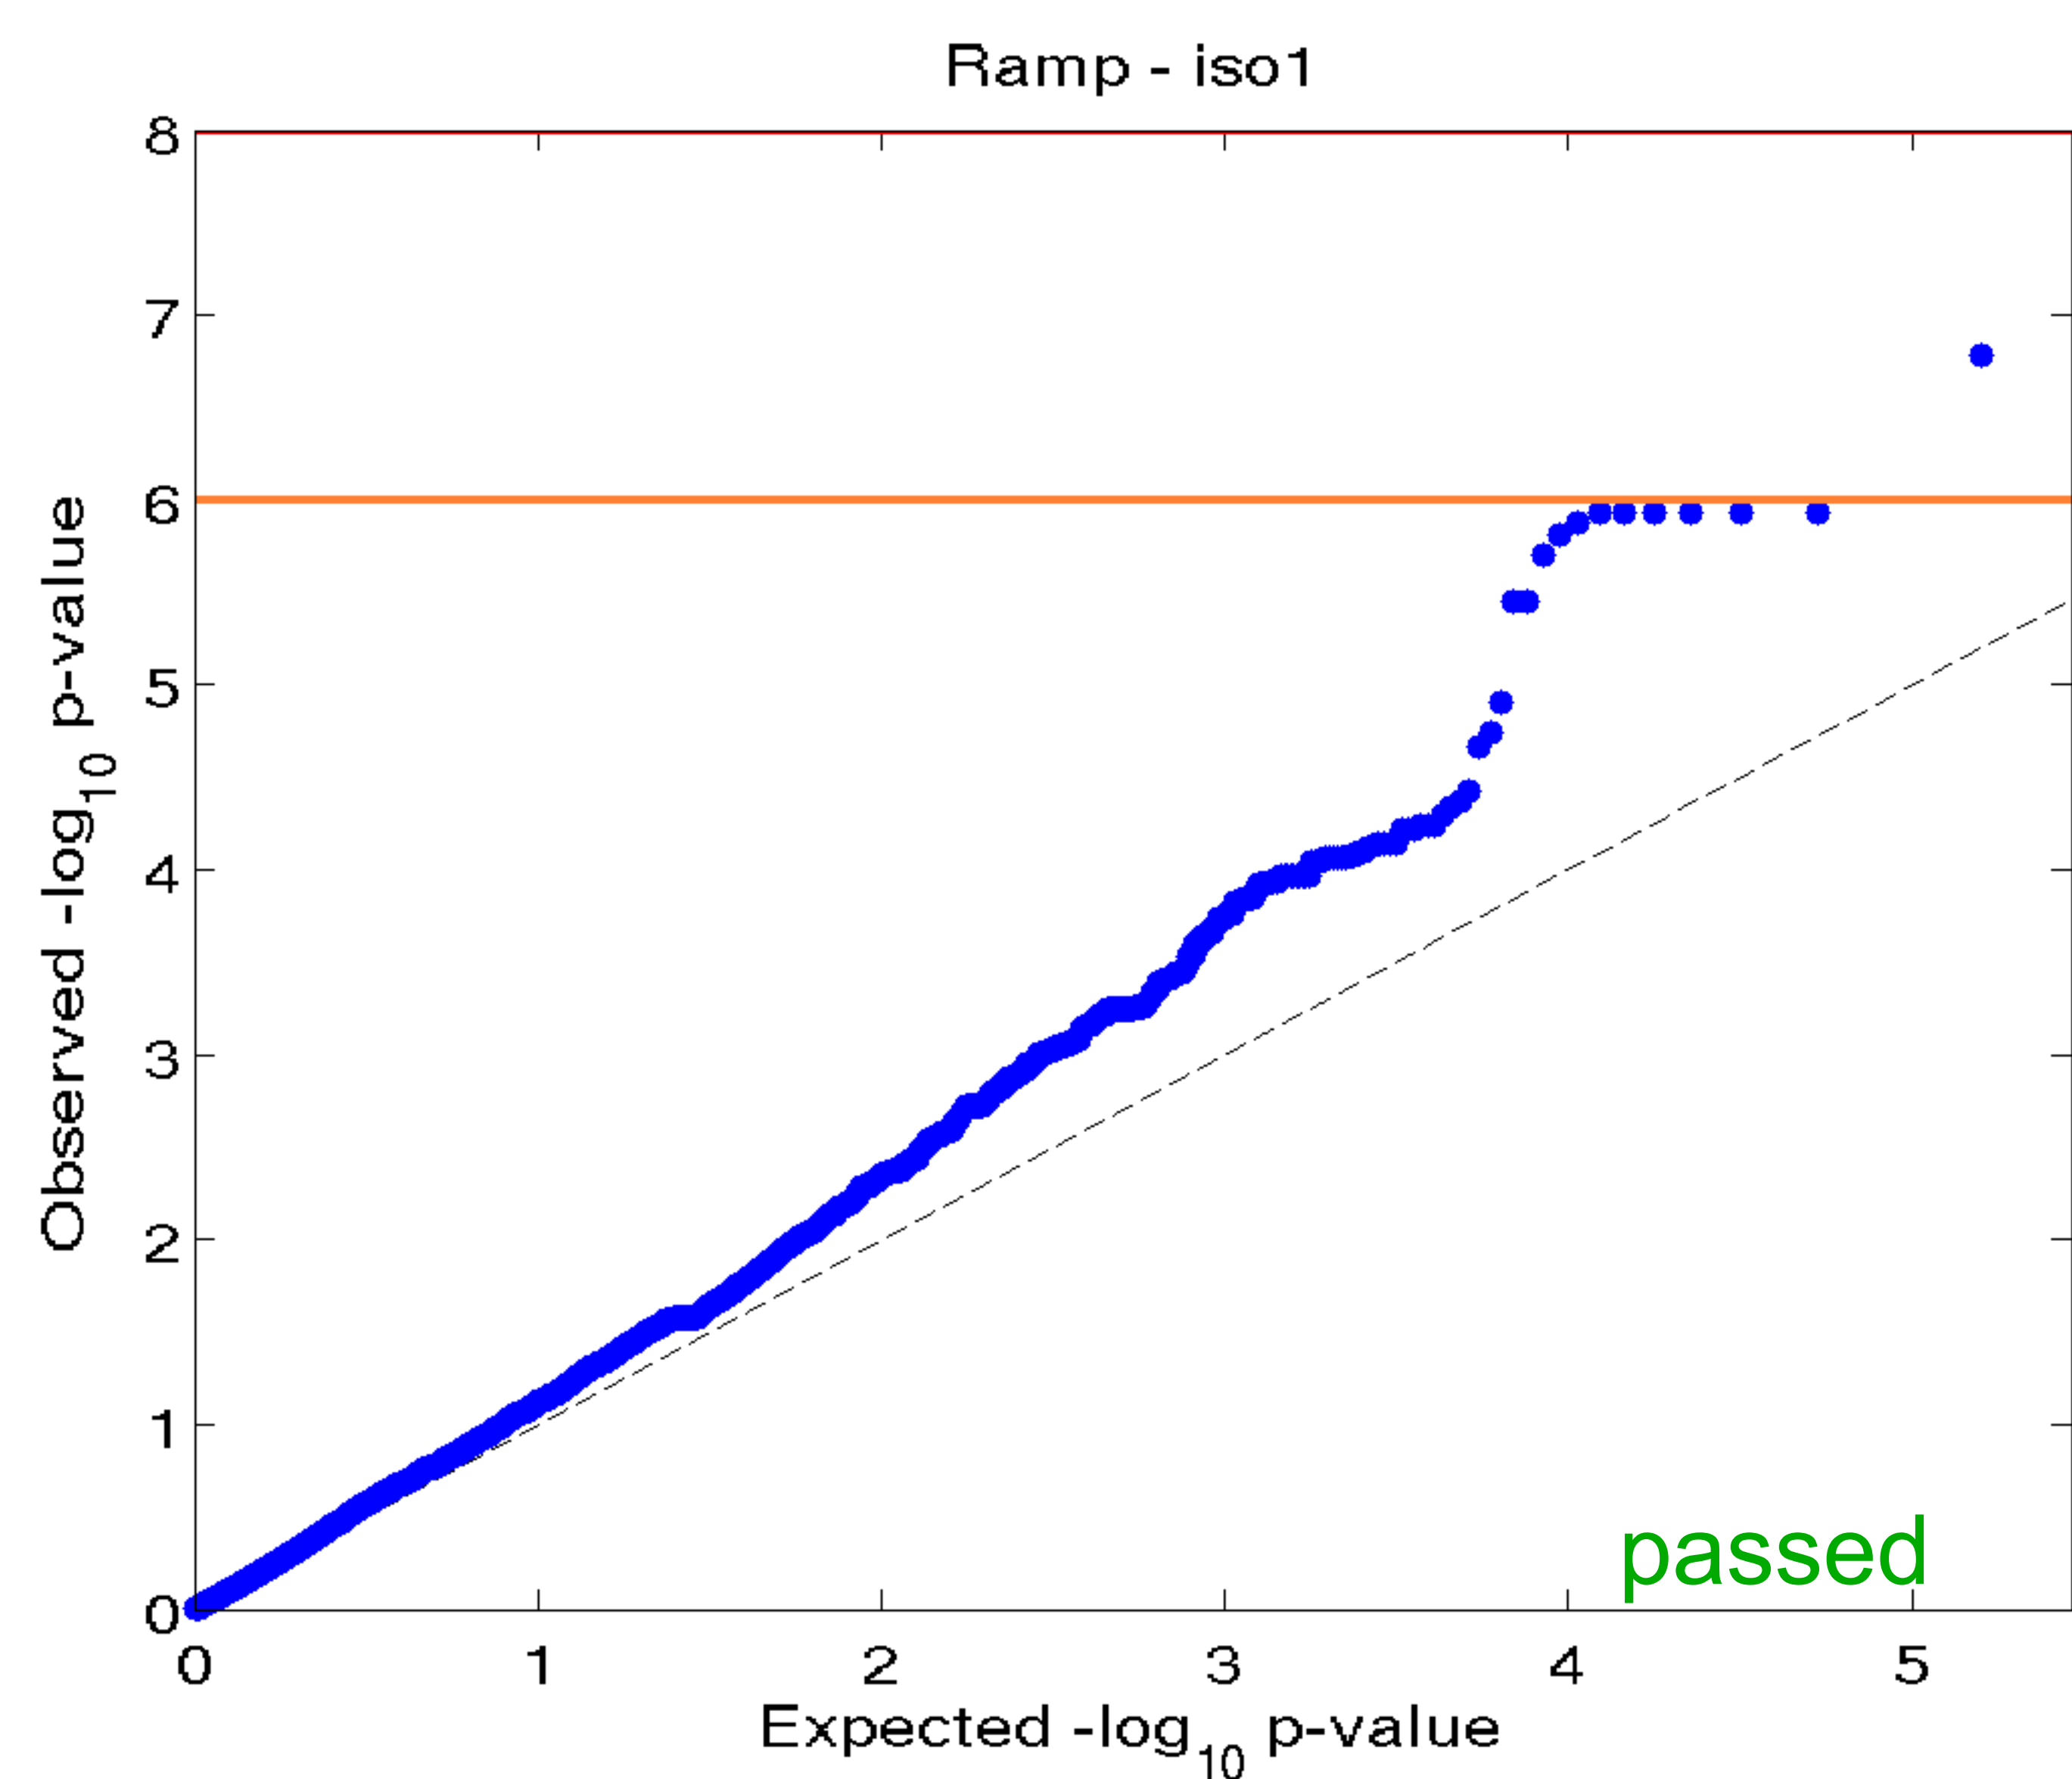

RR - iso1

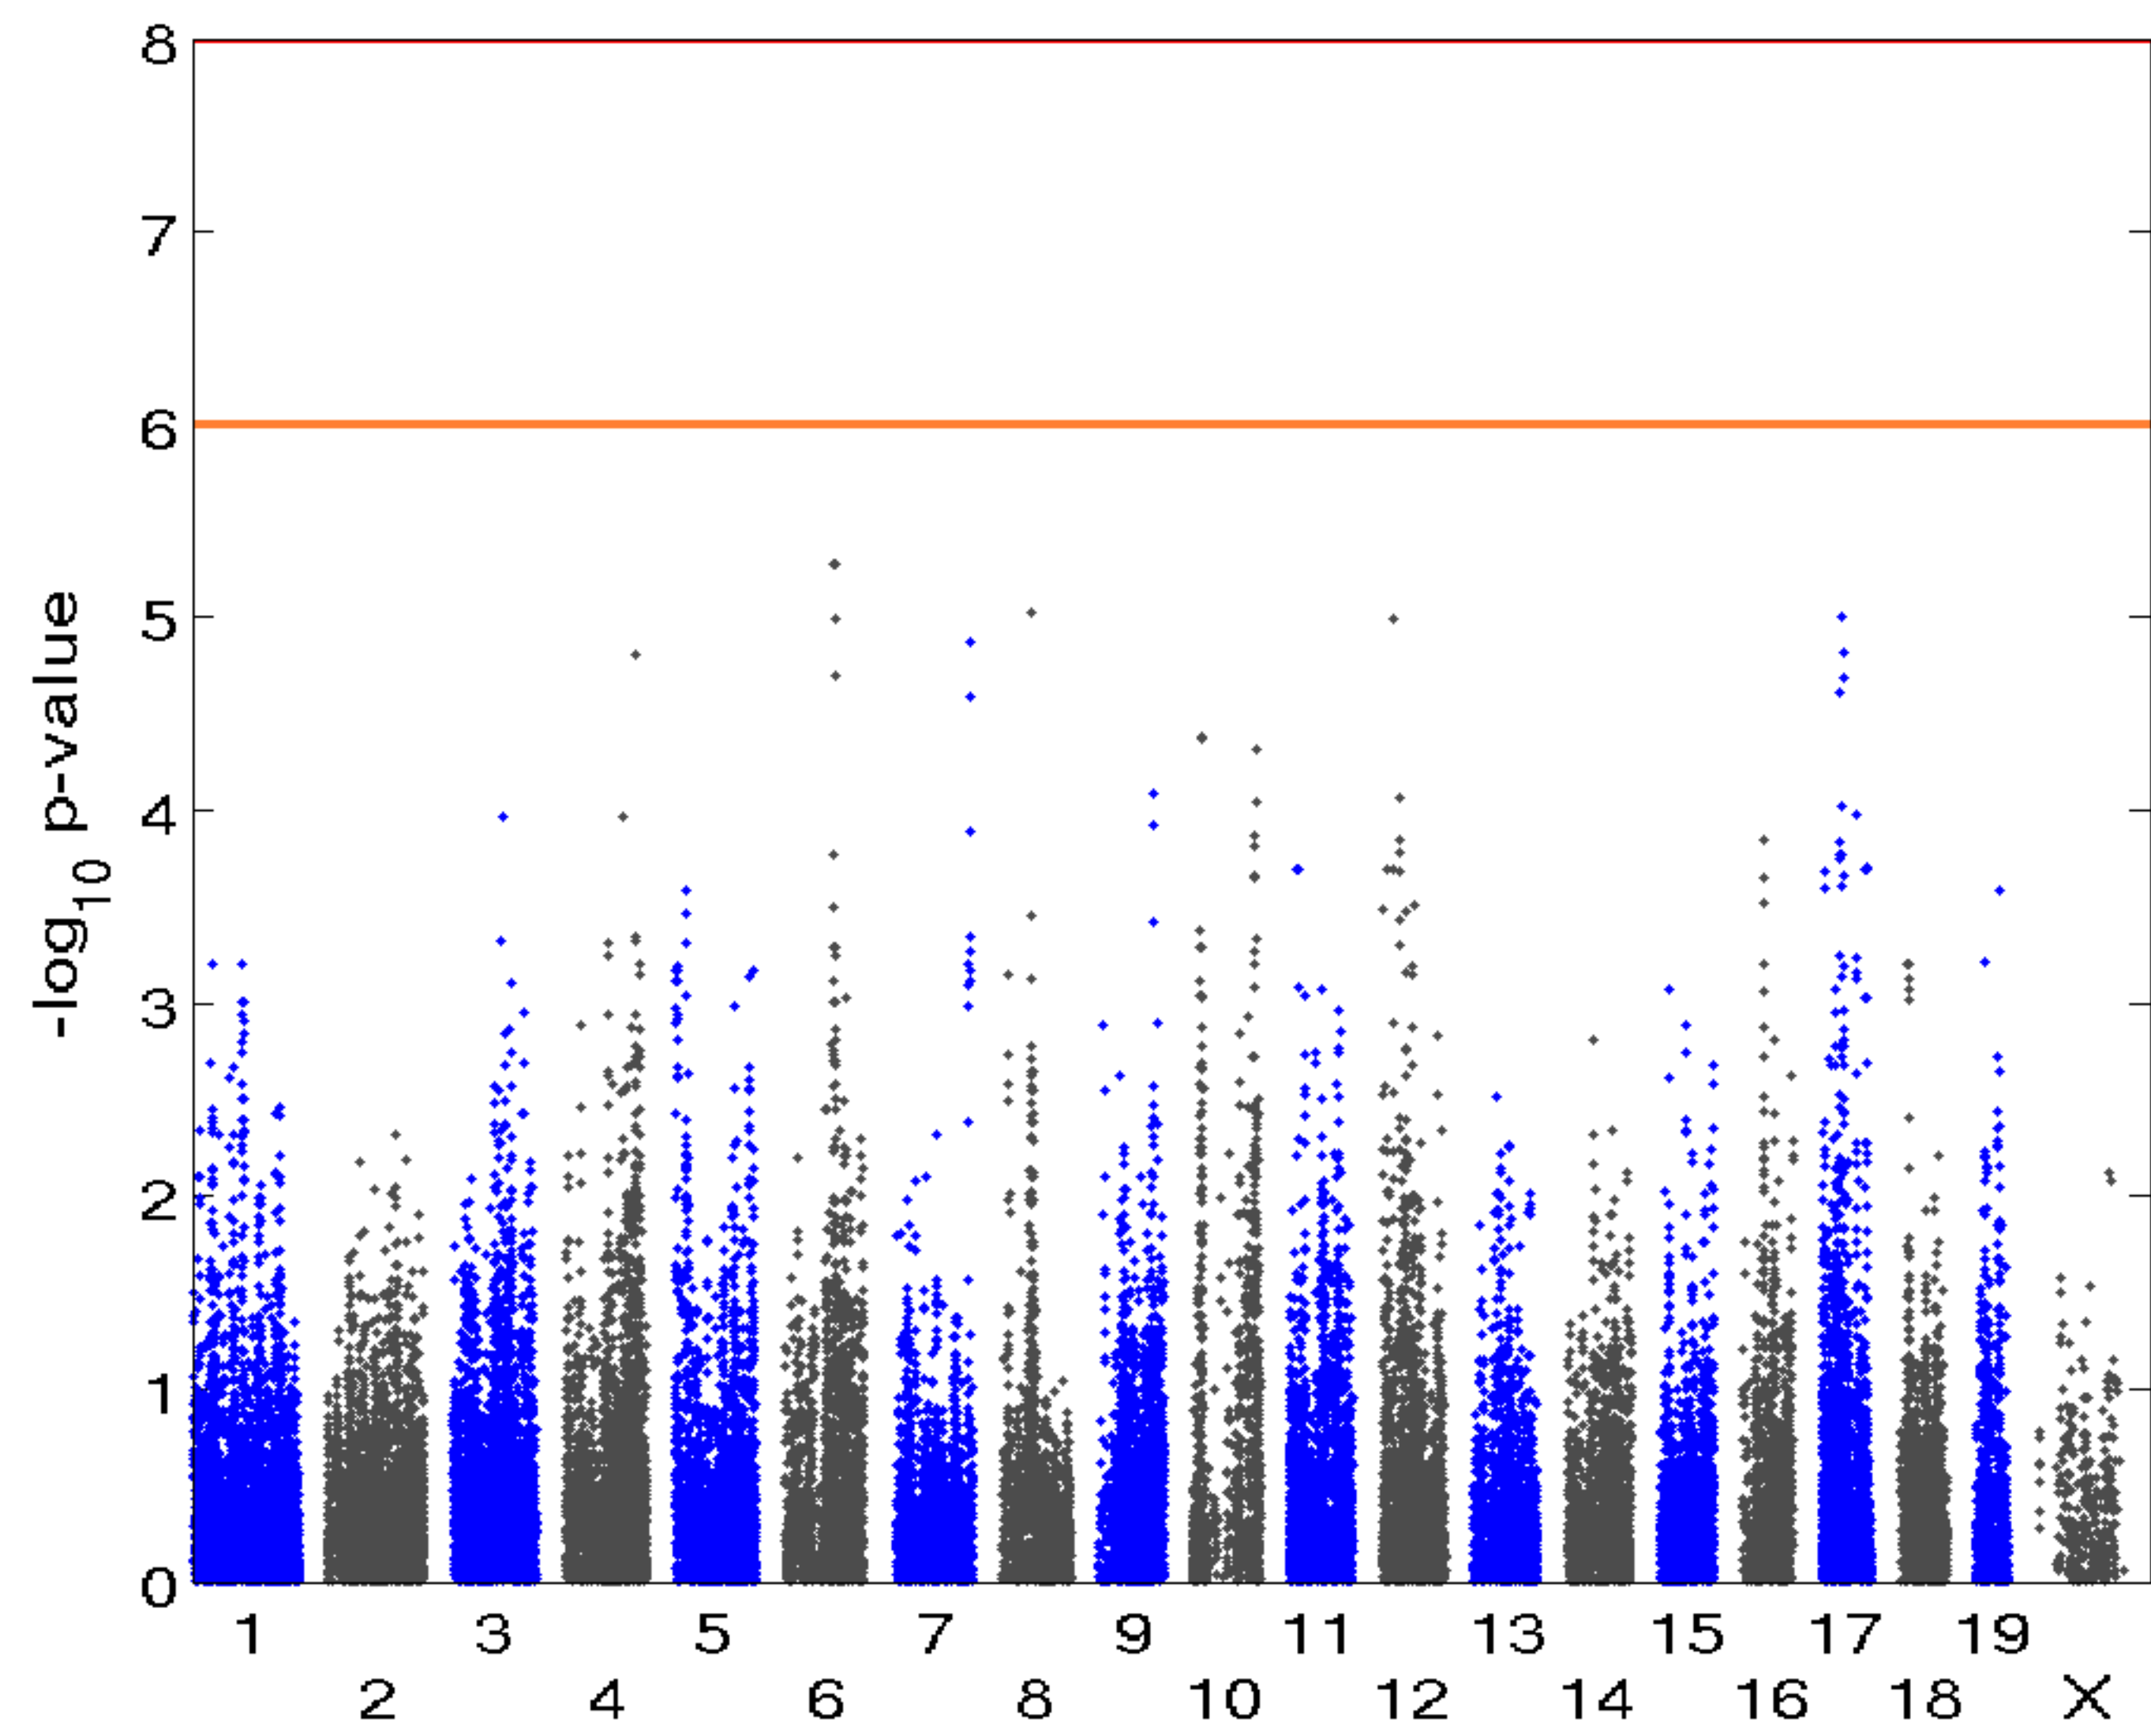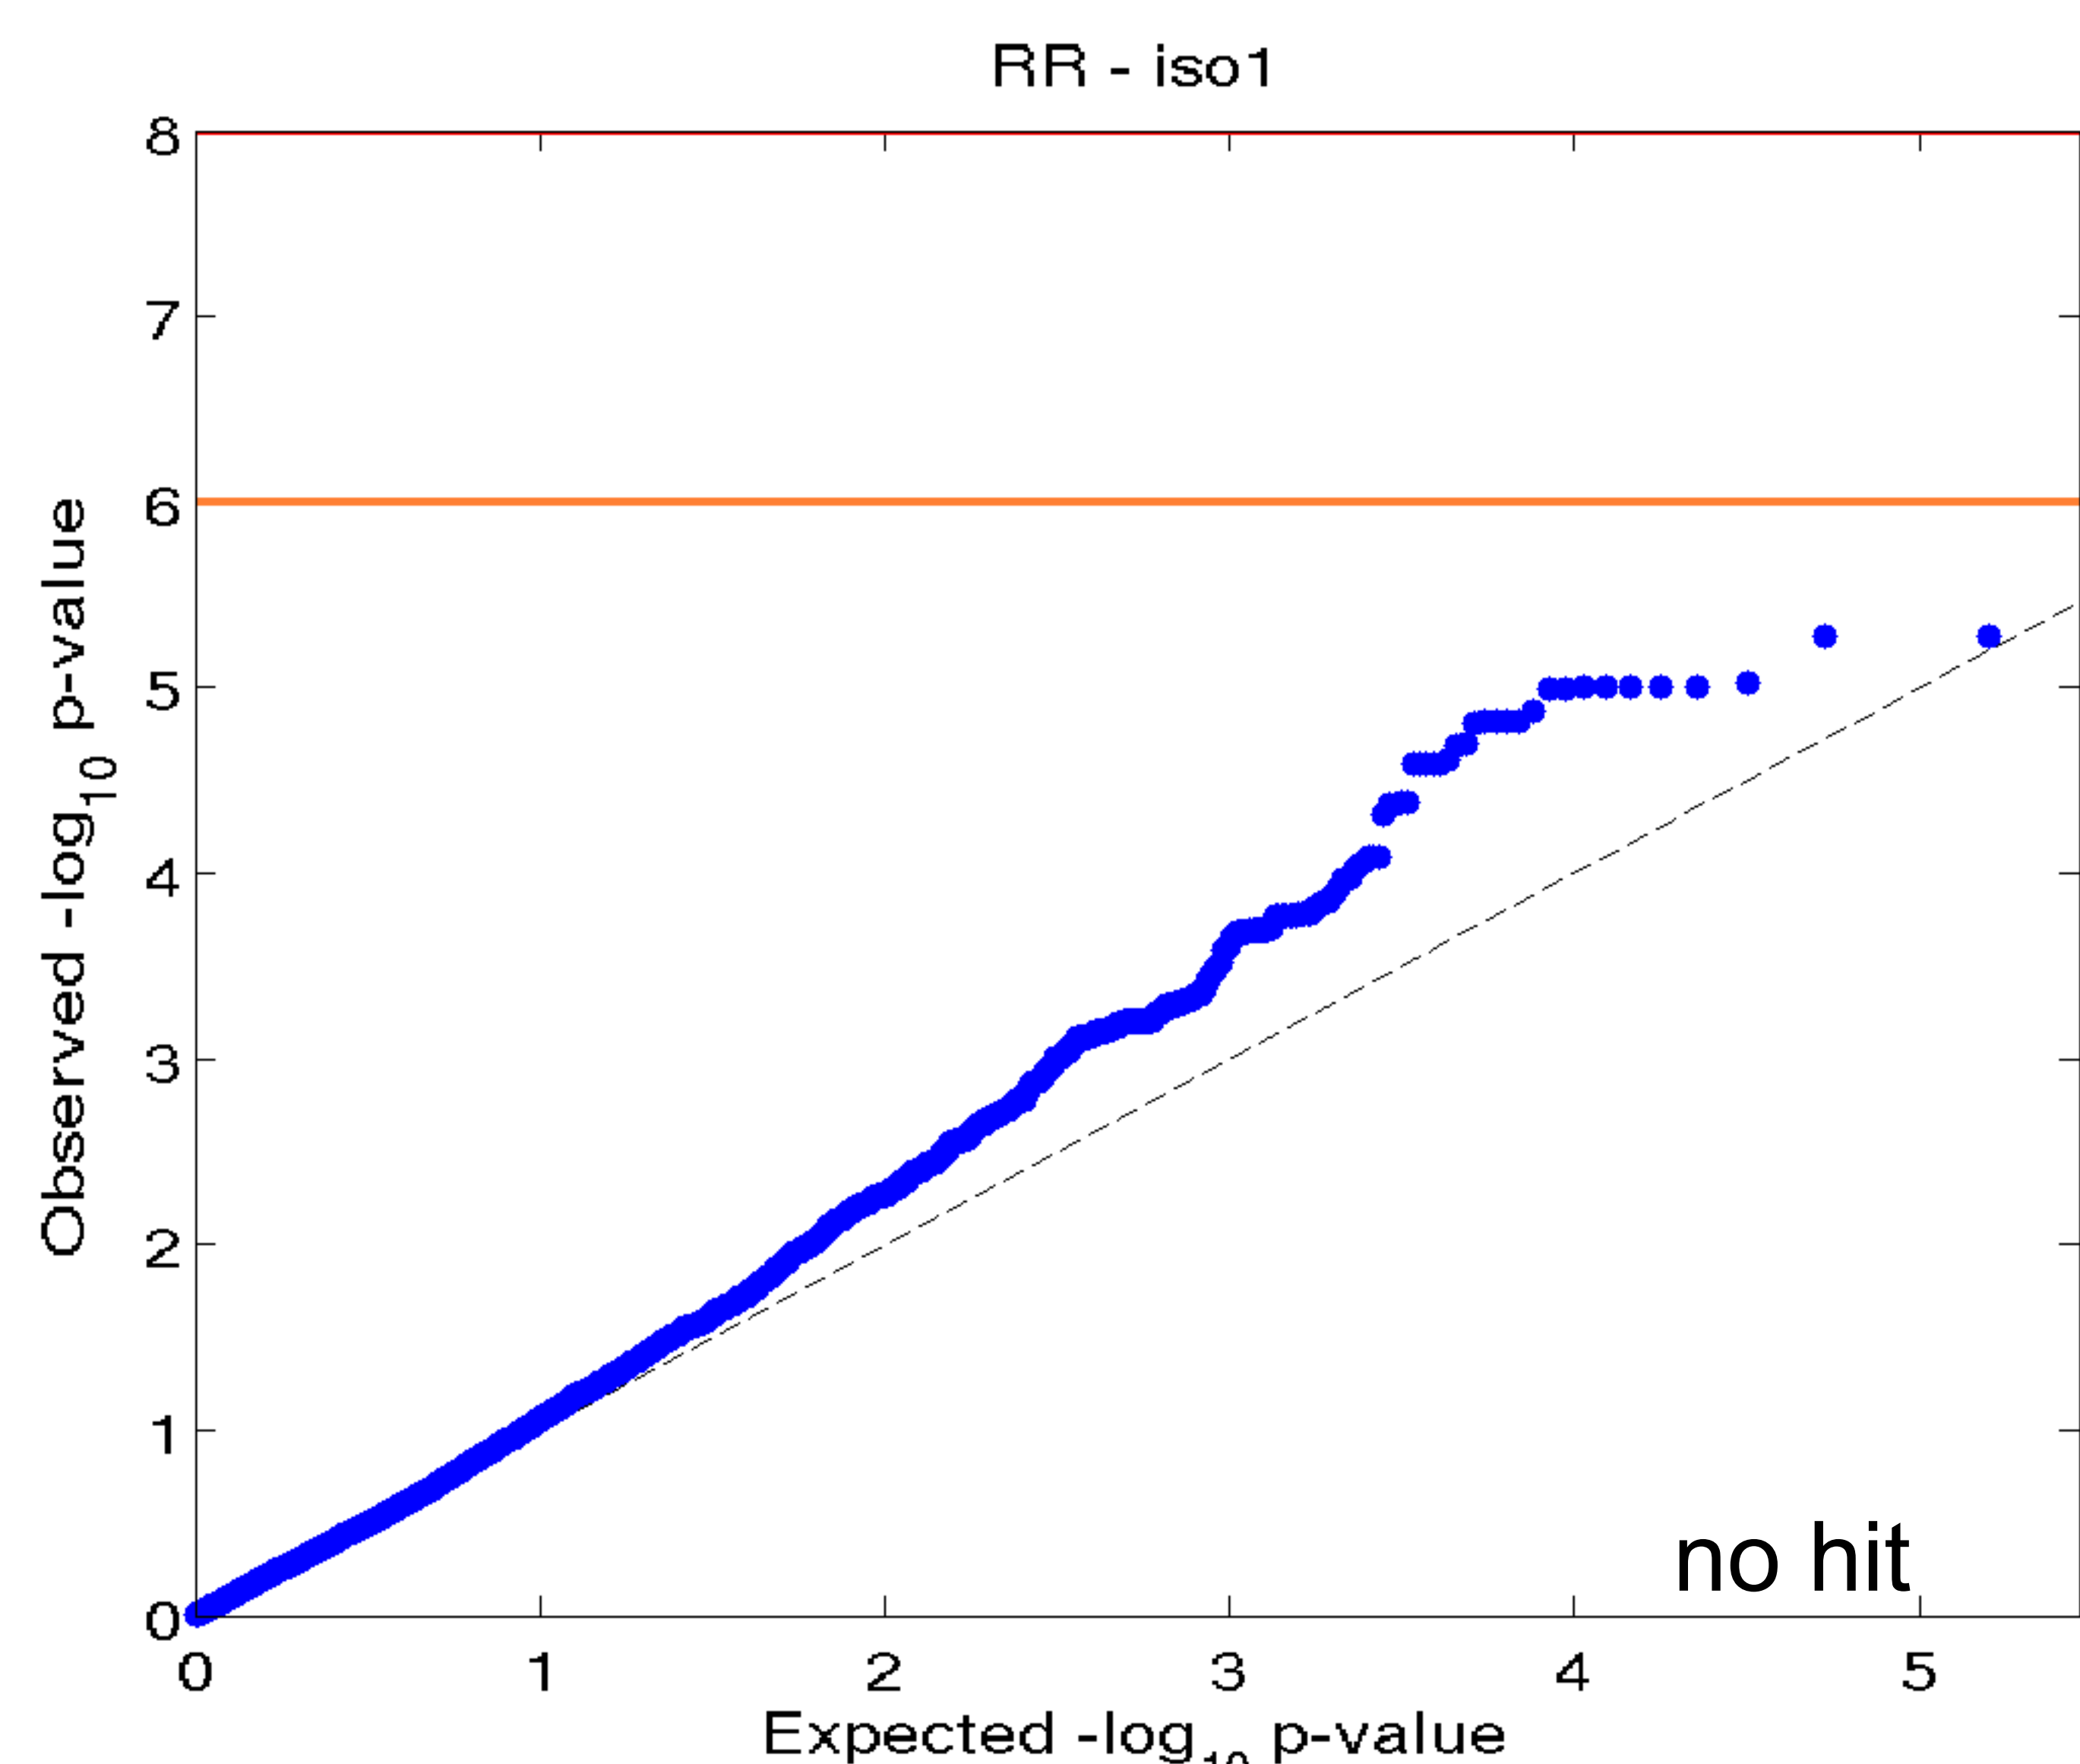

Samp - iso1

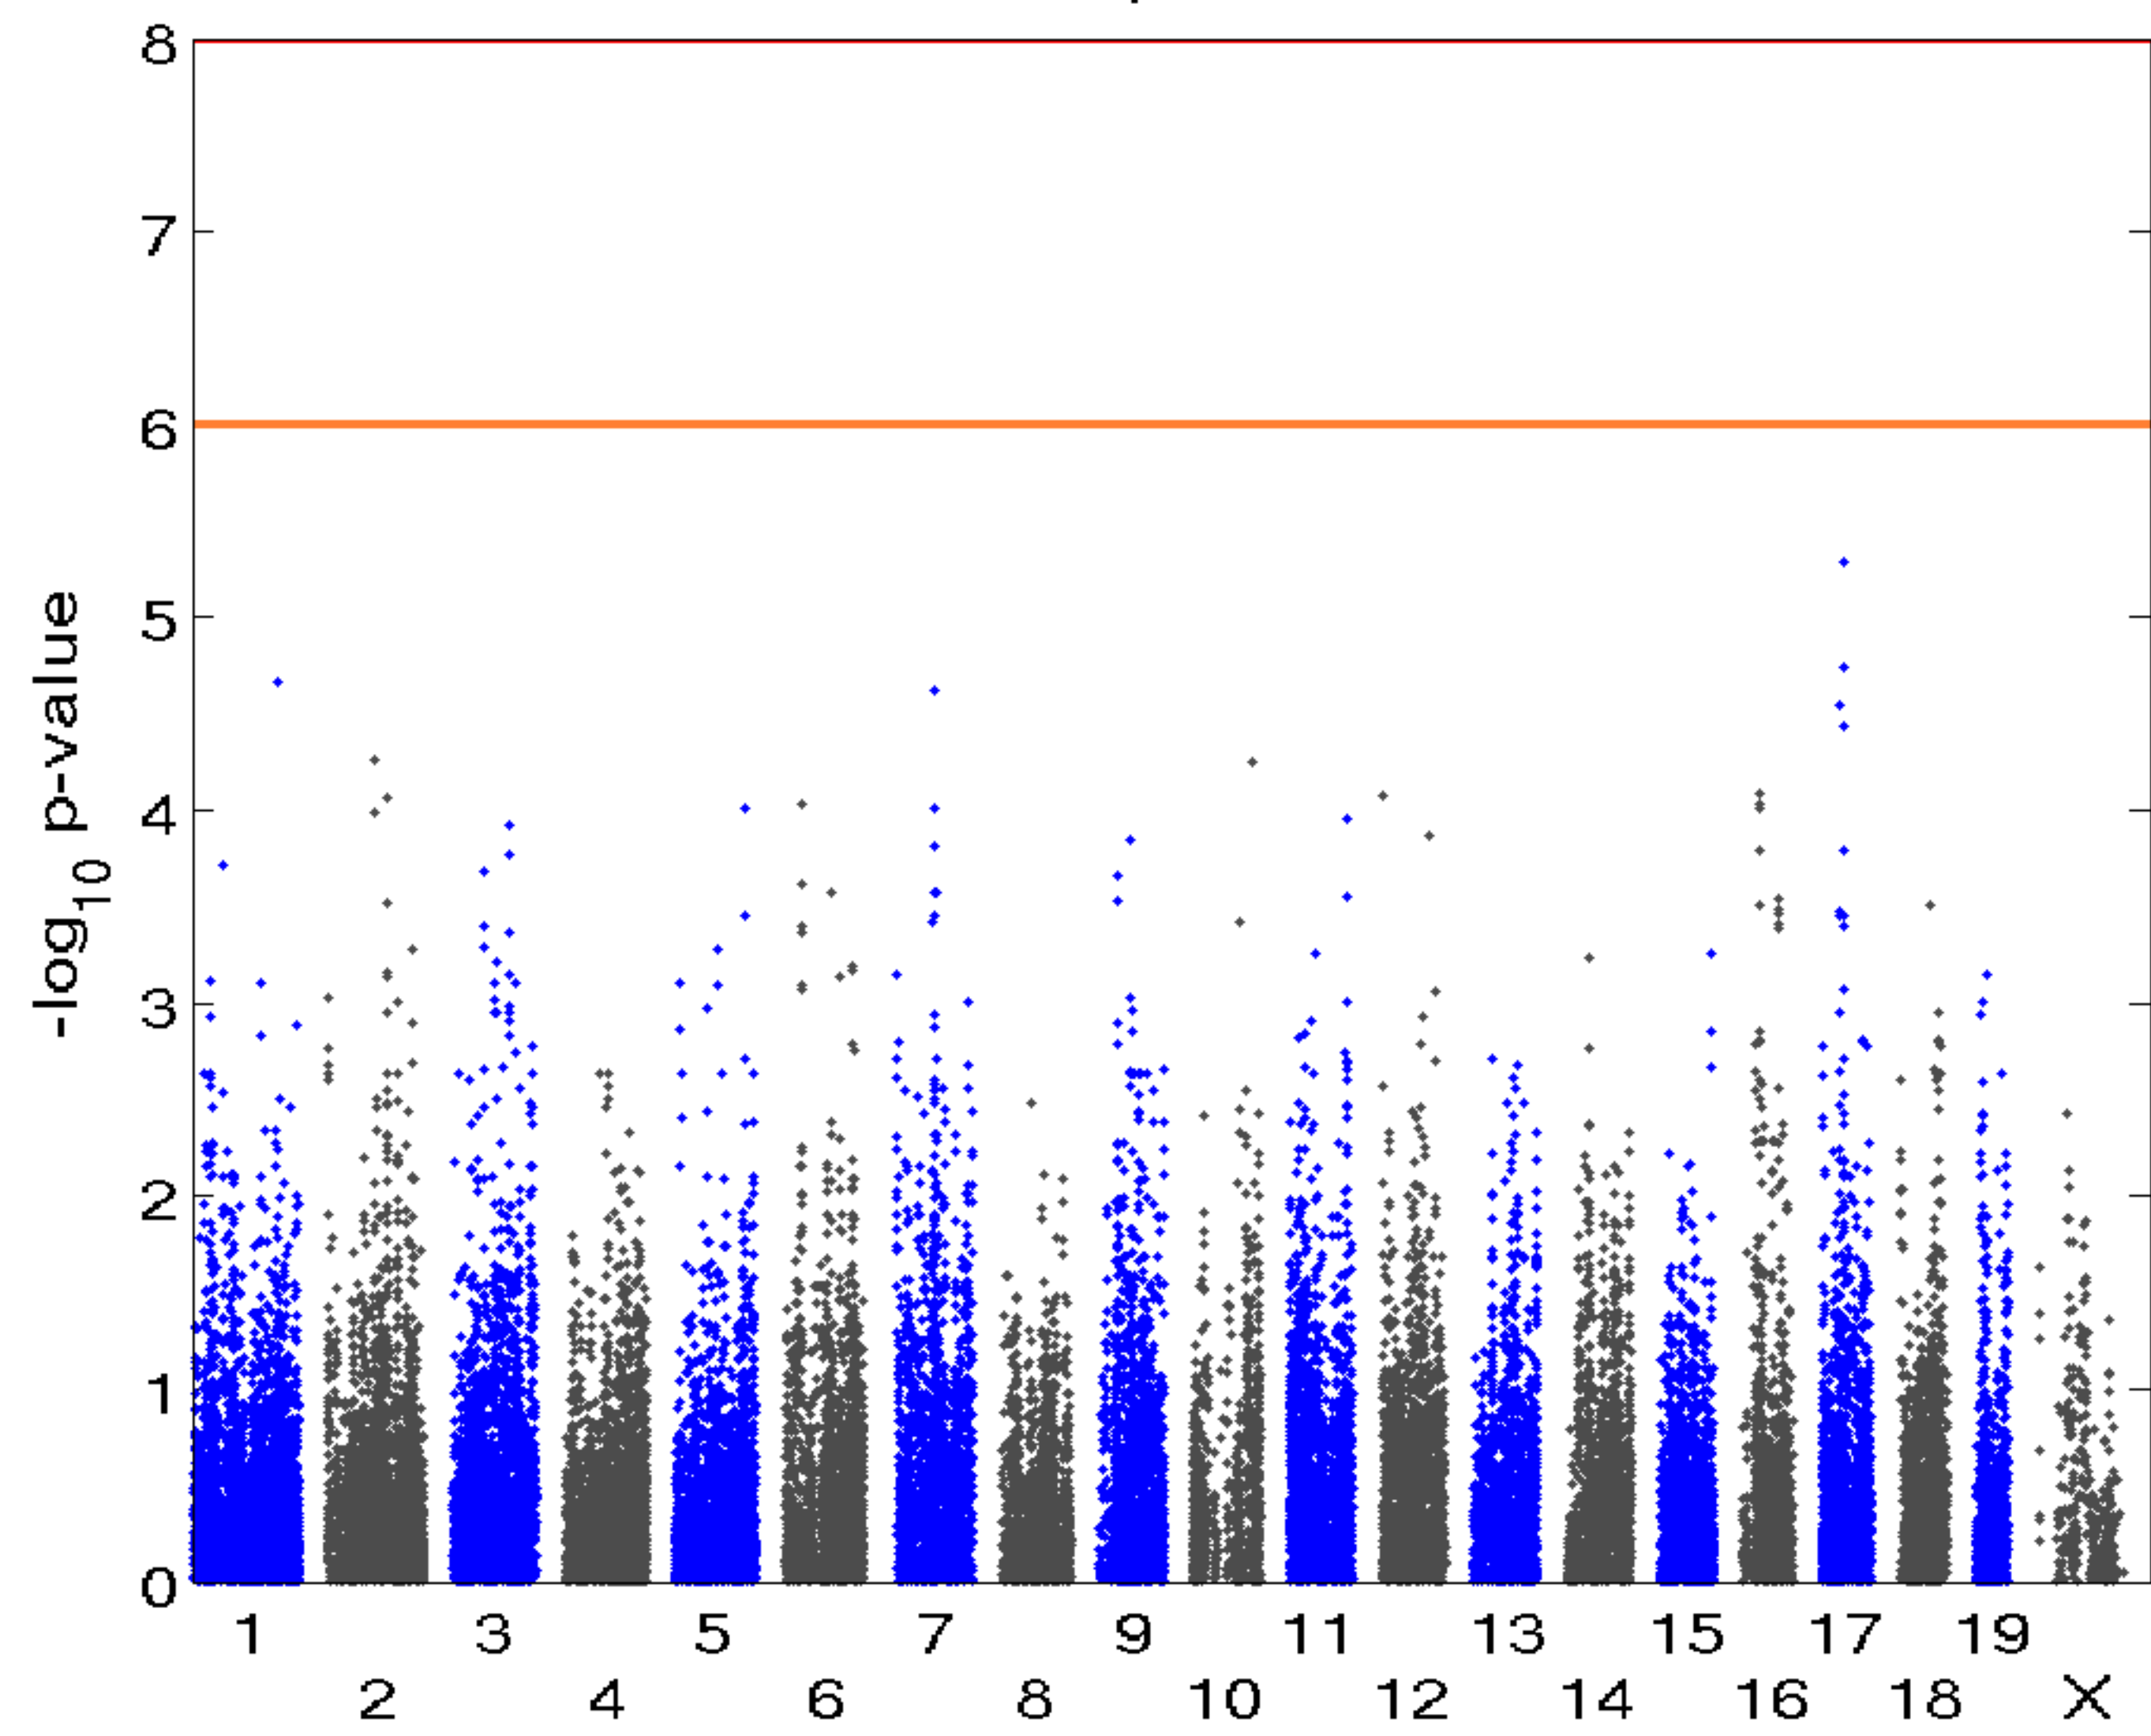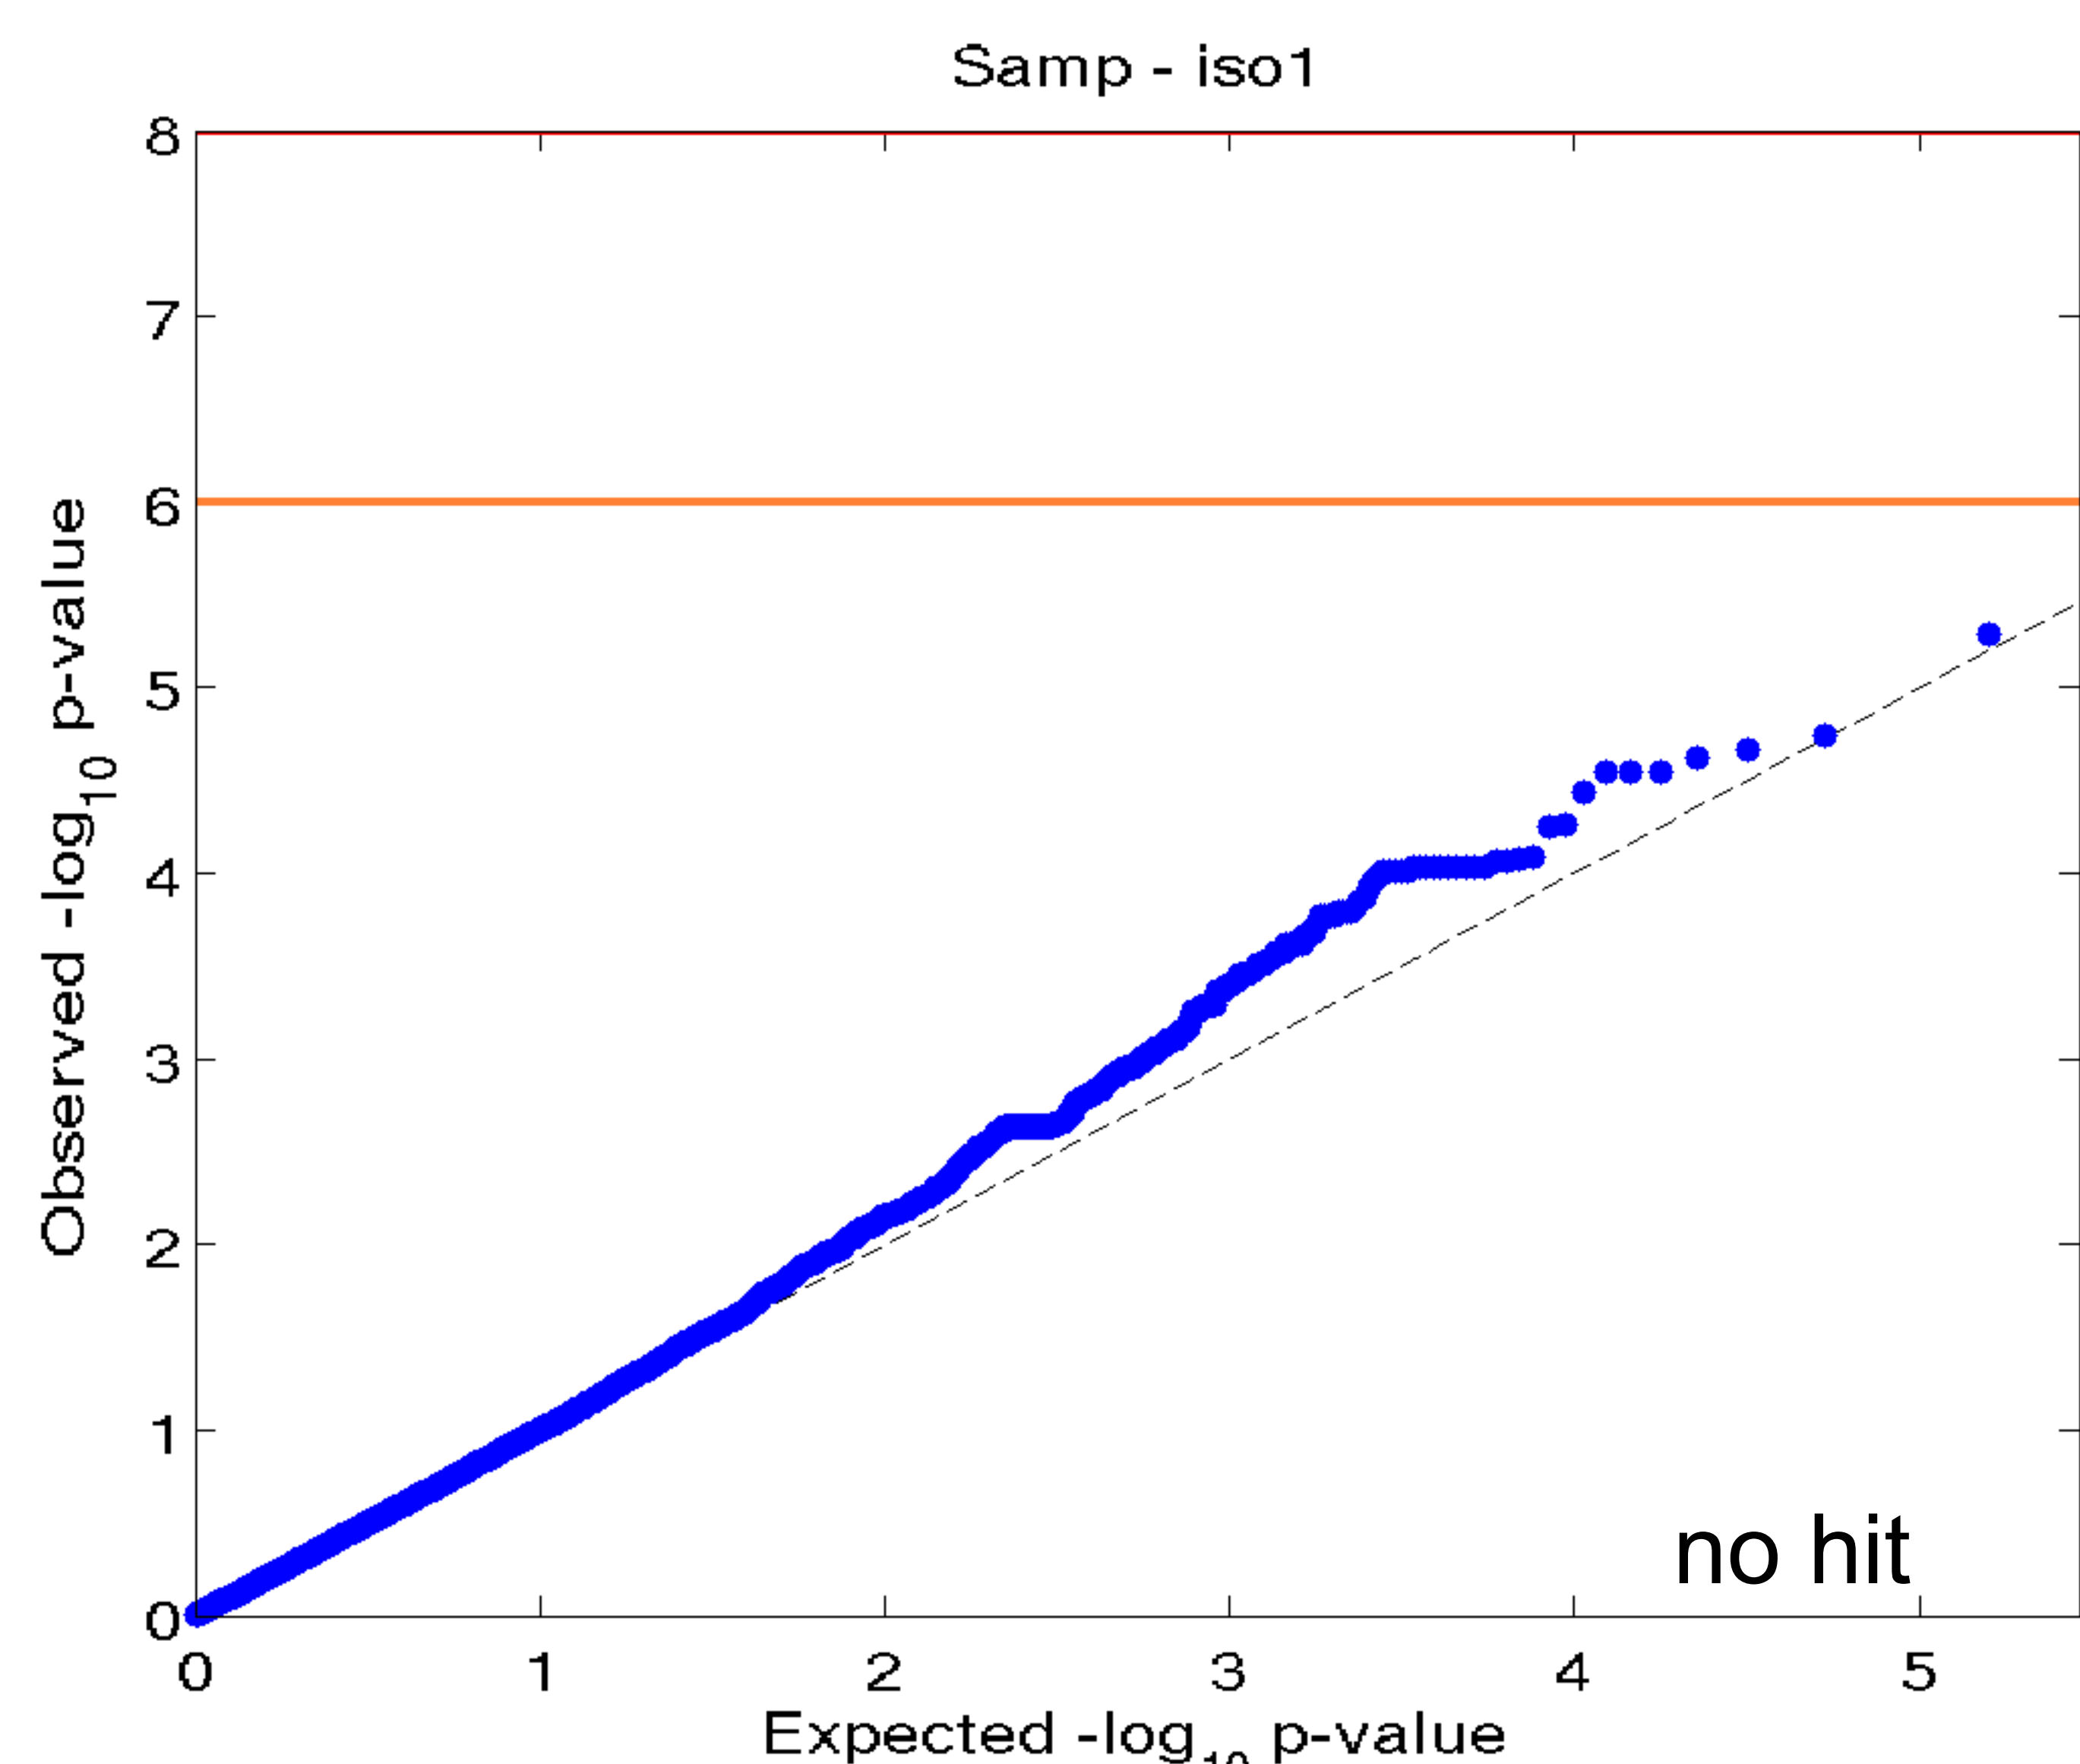



SBP - iso1

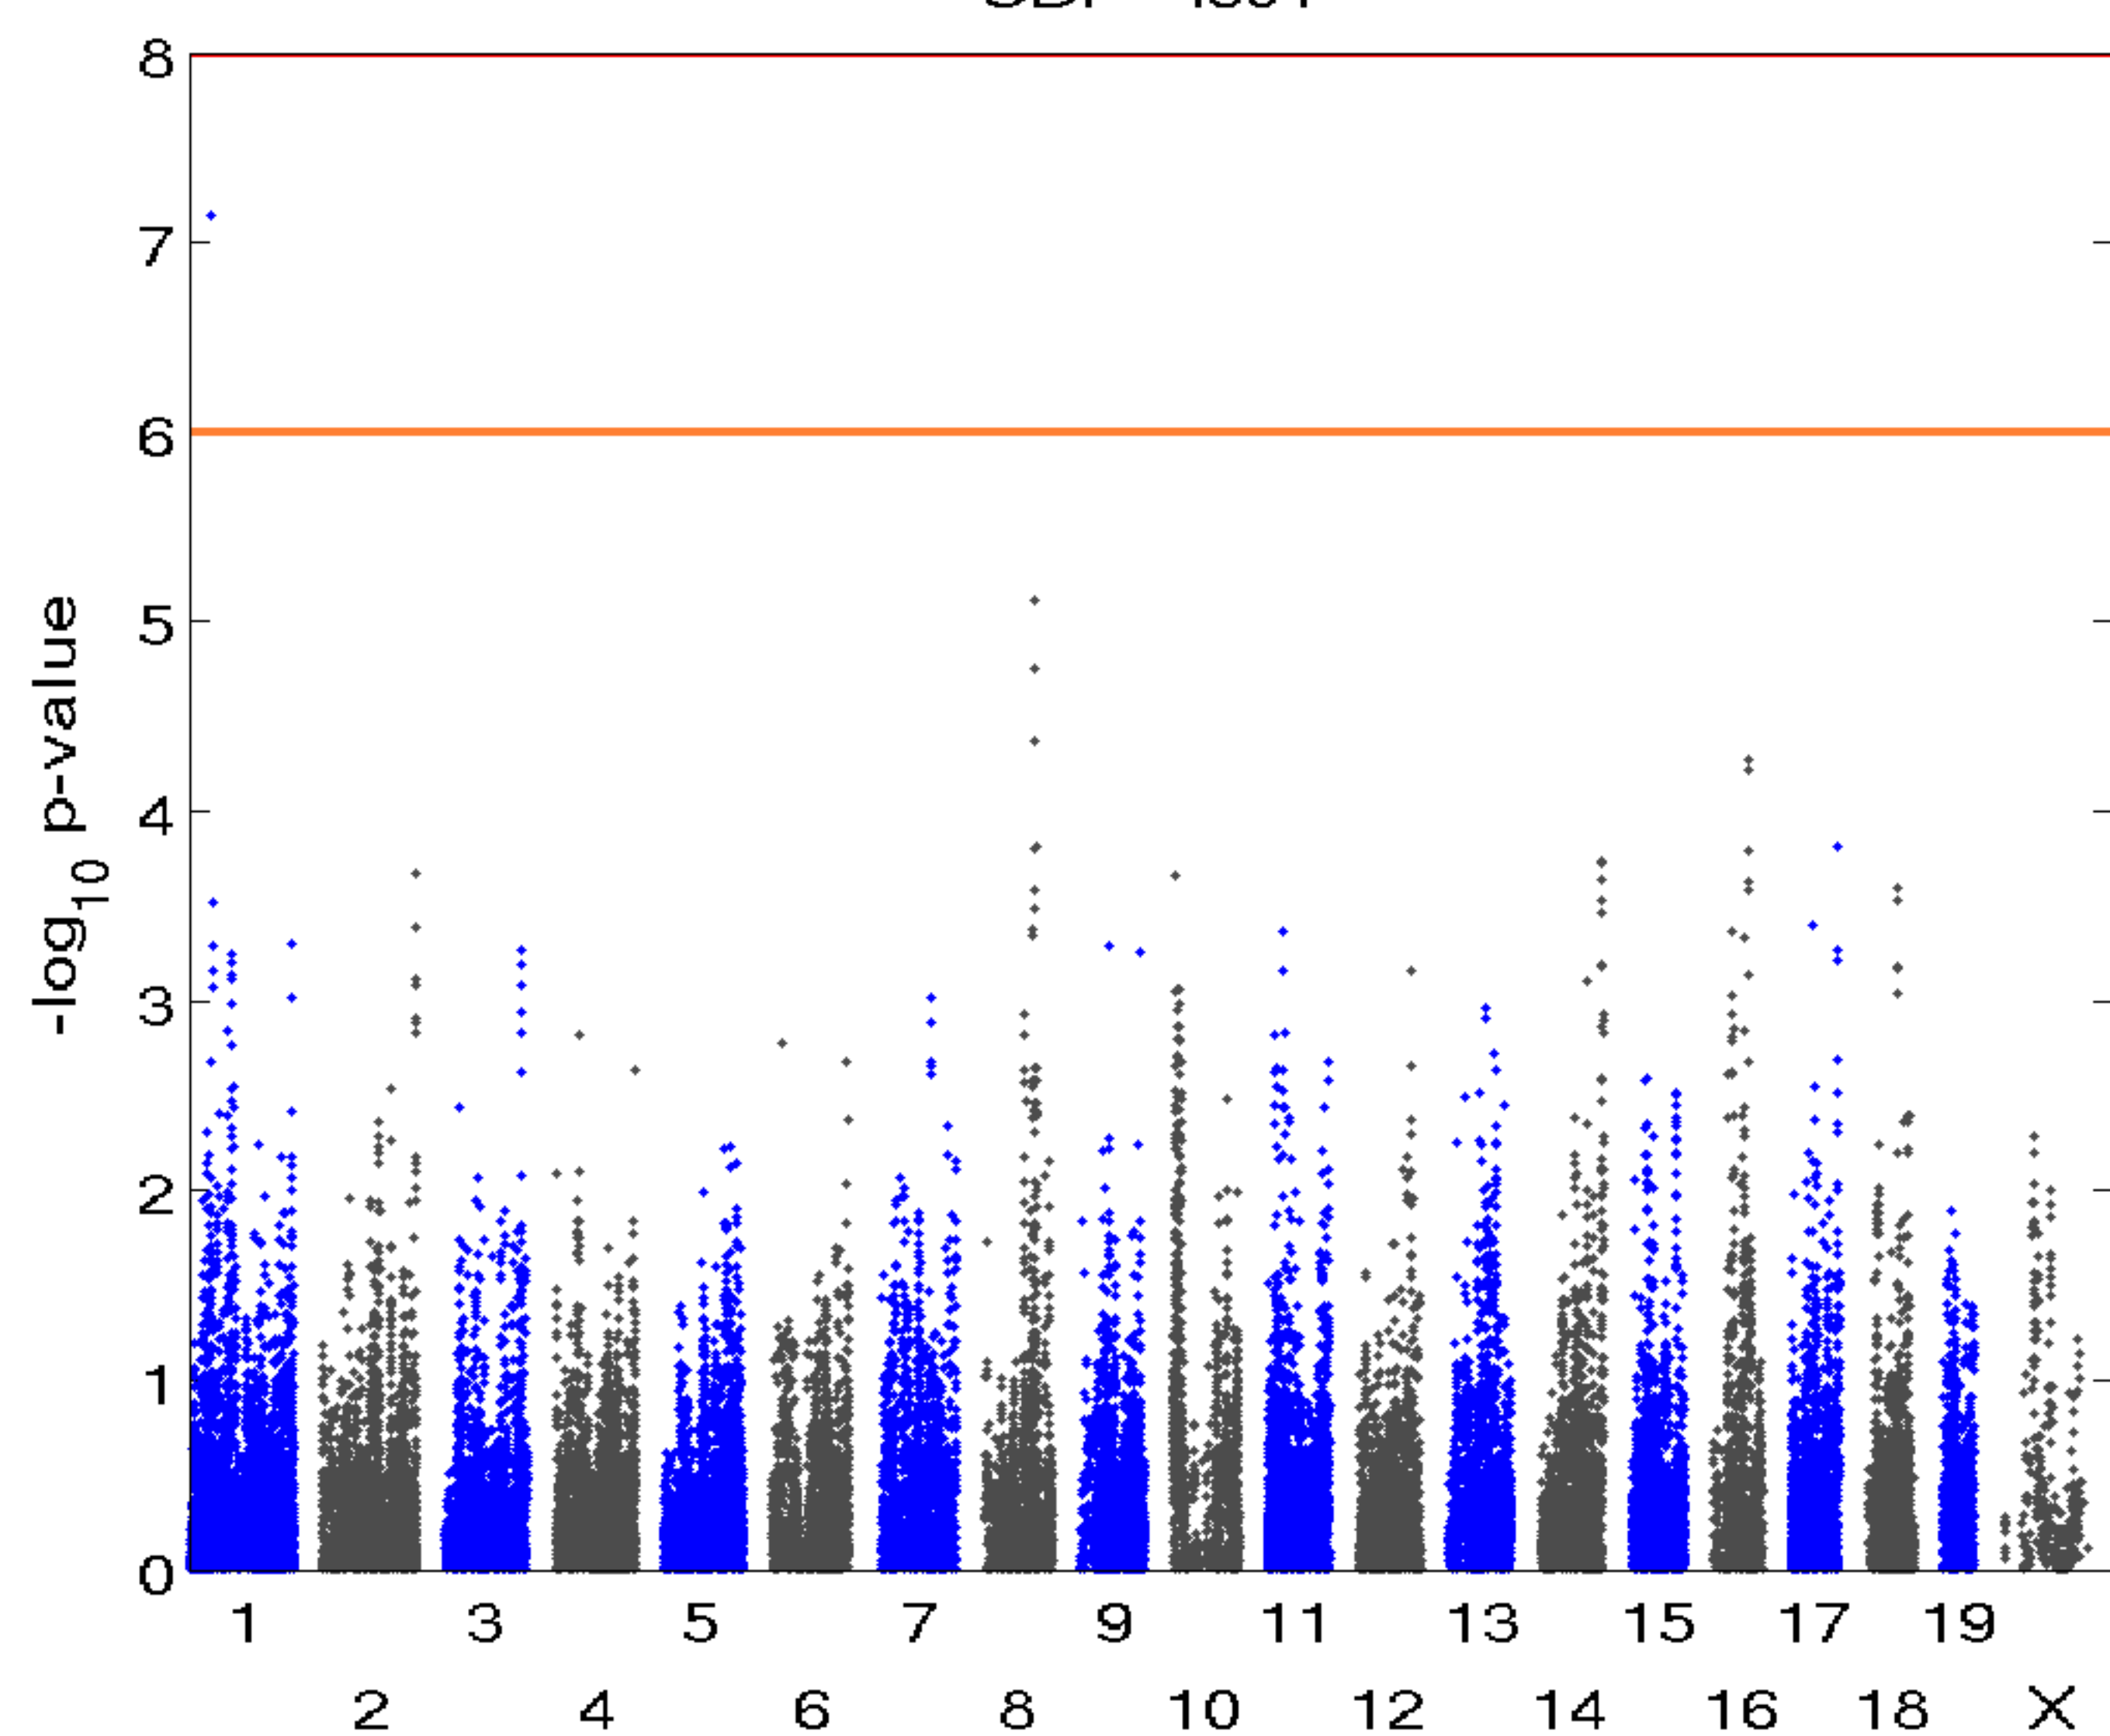

SBP - iso1

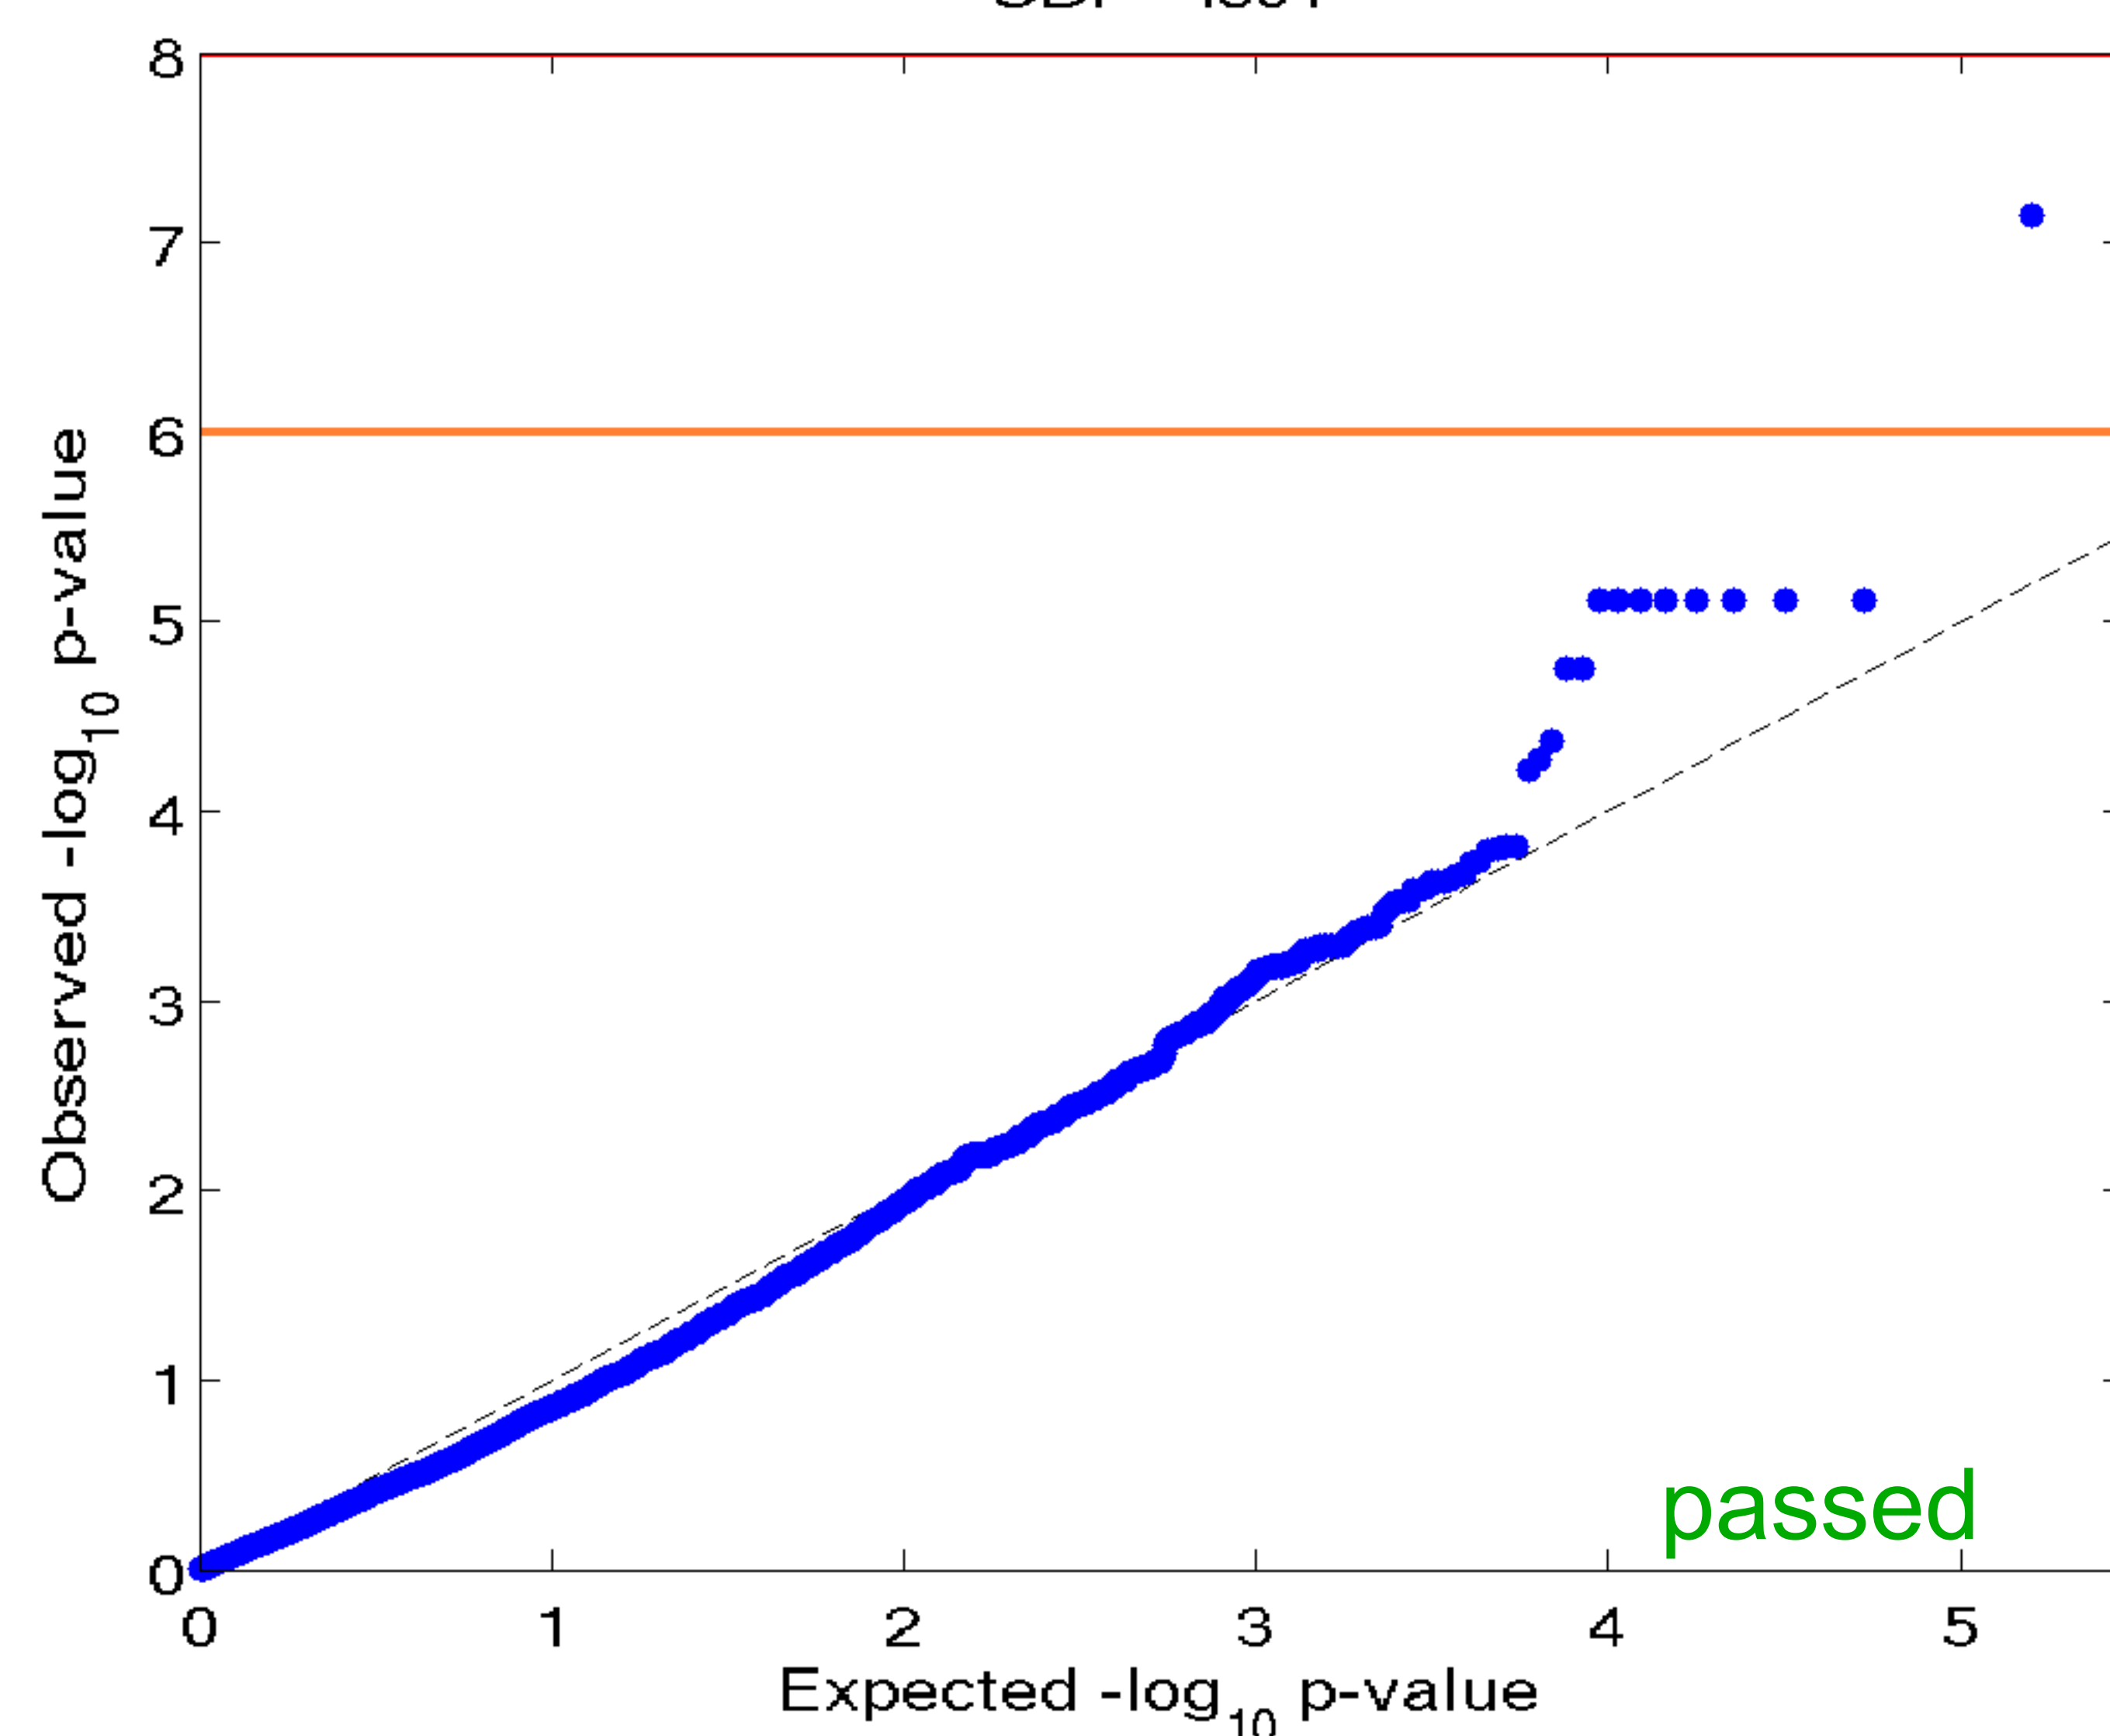

ST - iso1

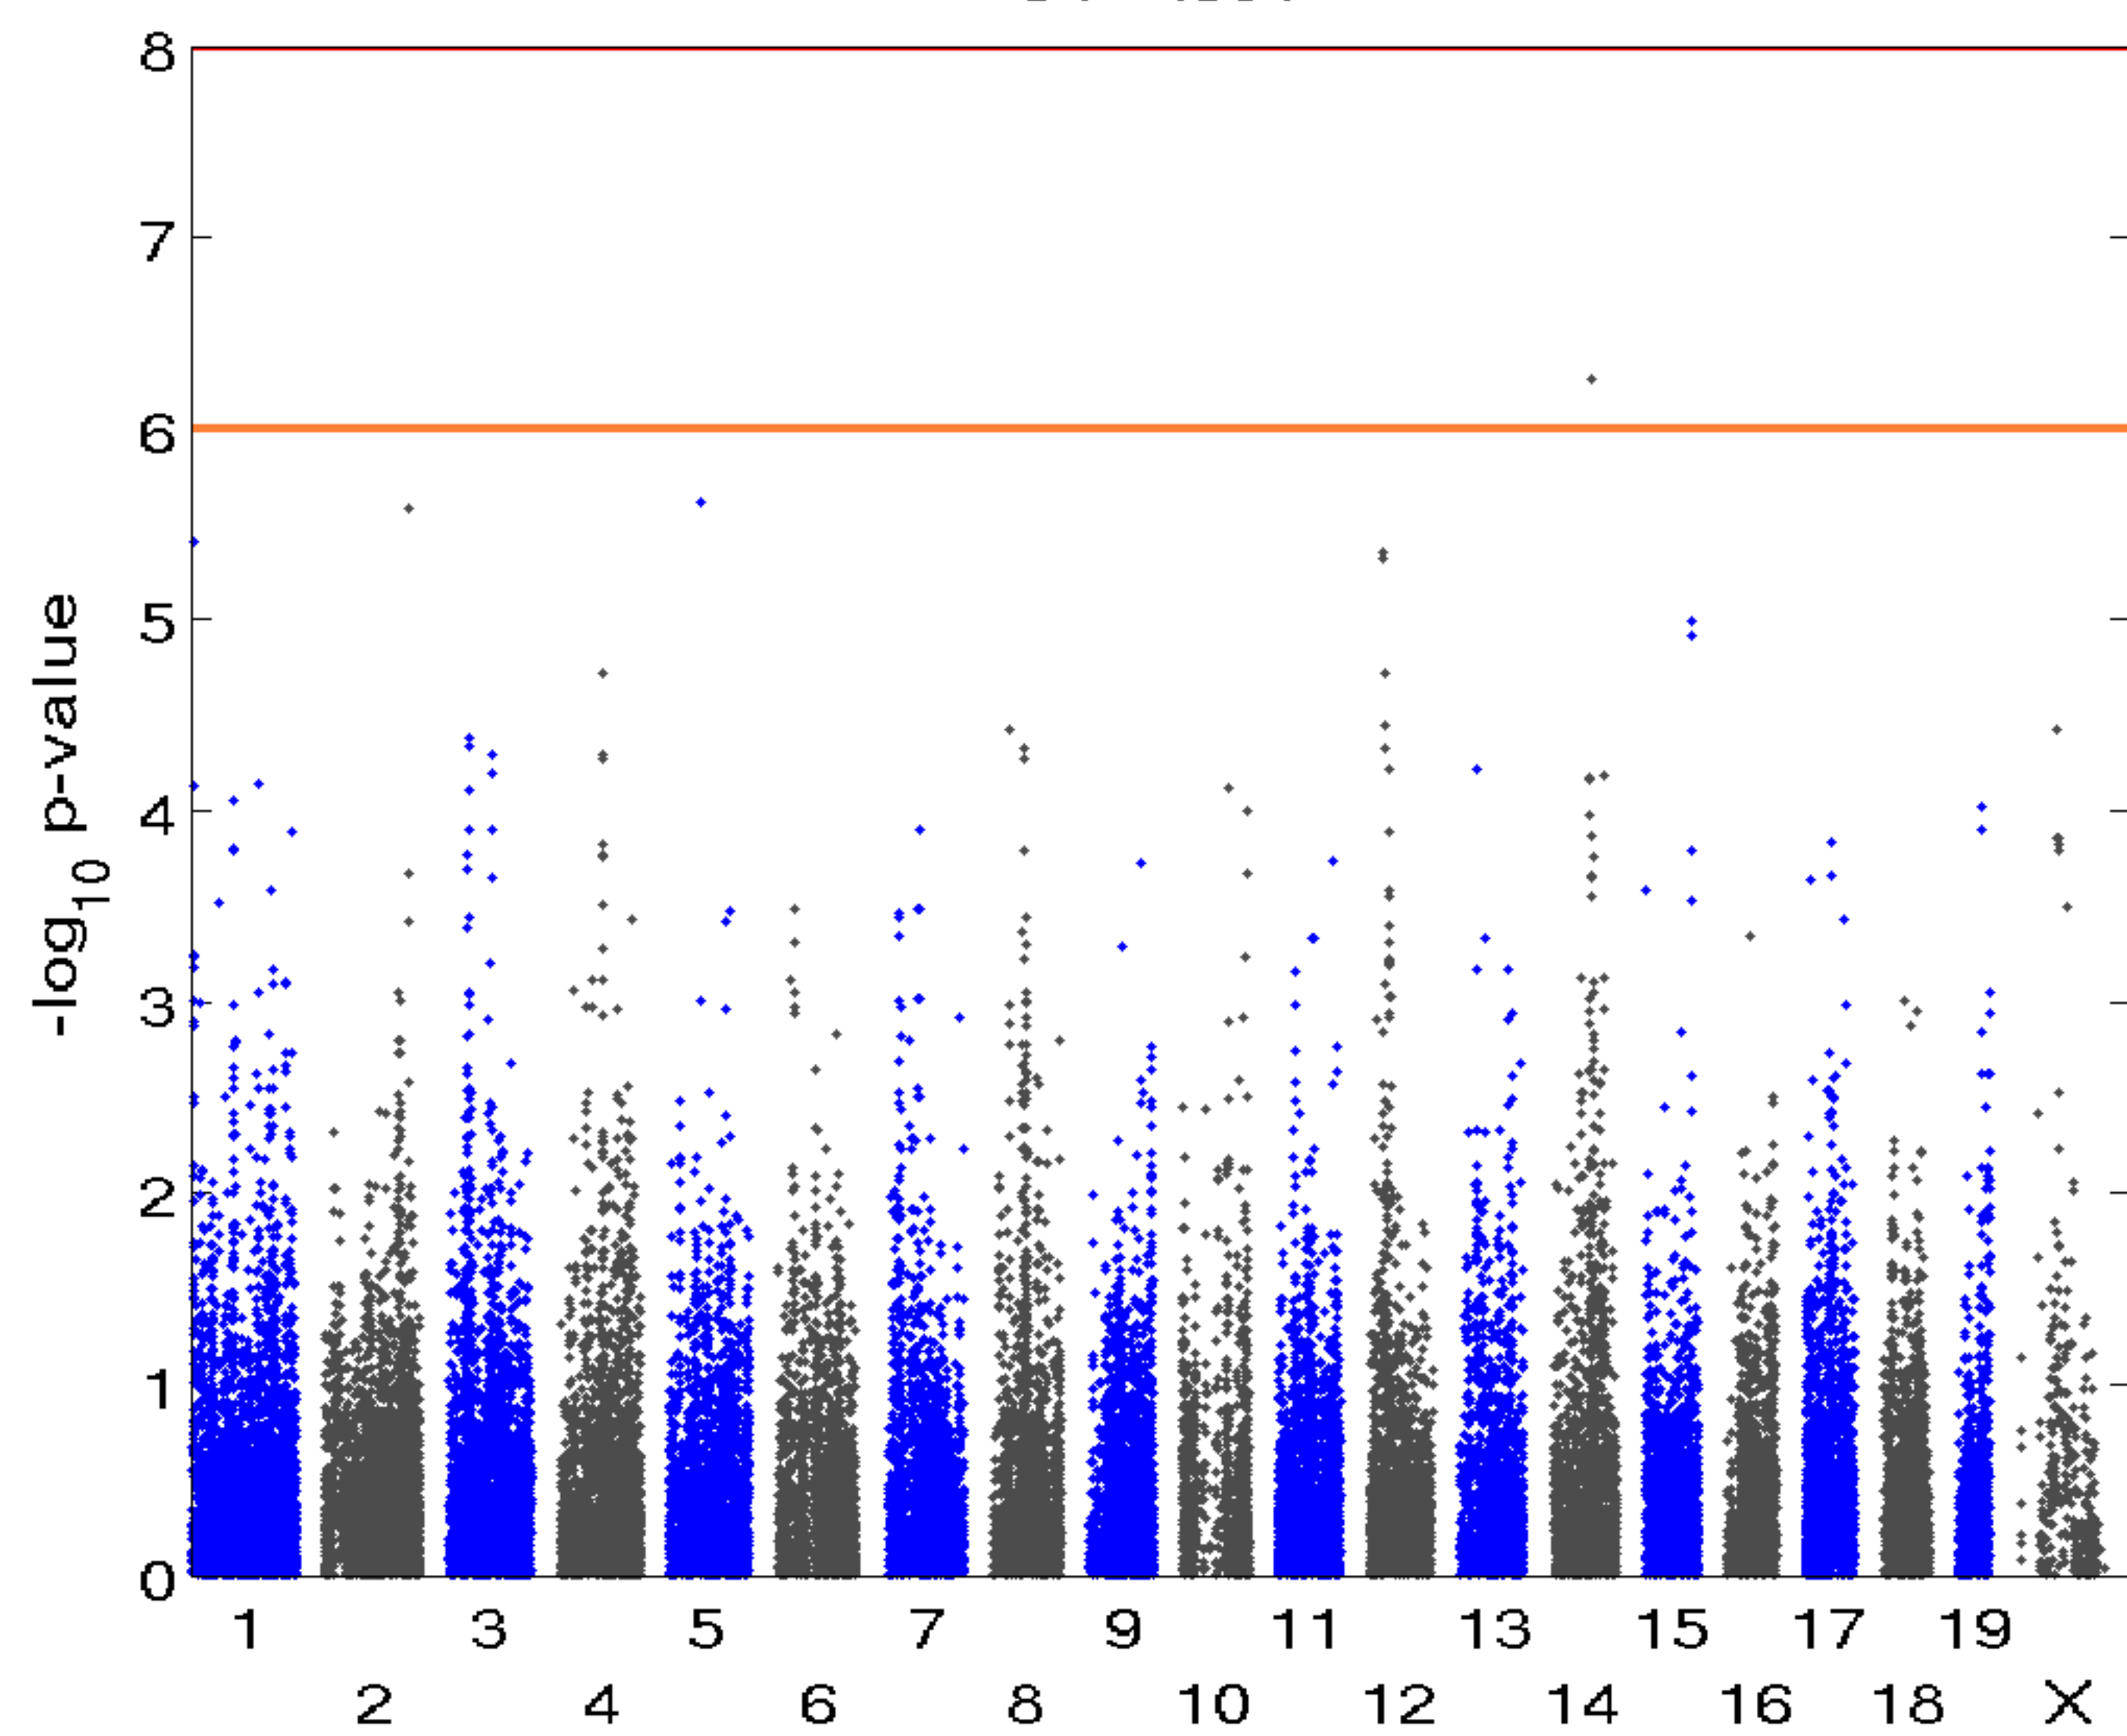

ST - iso1

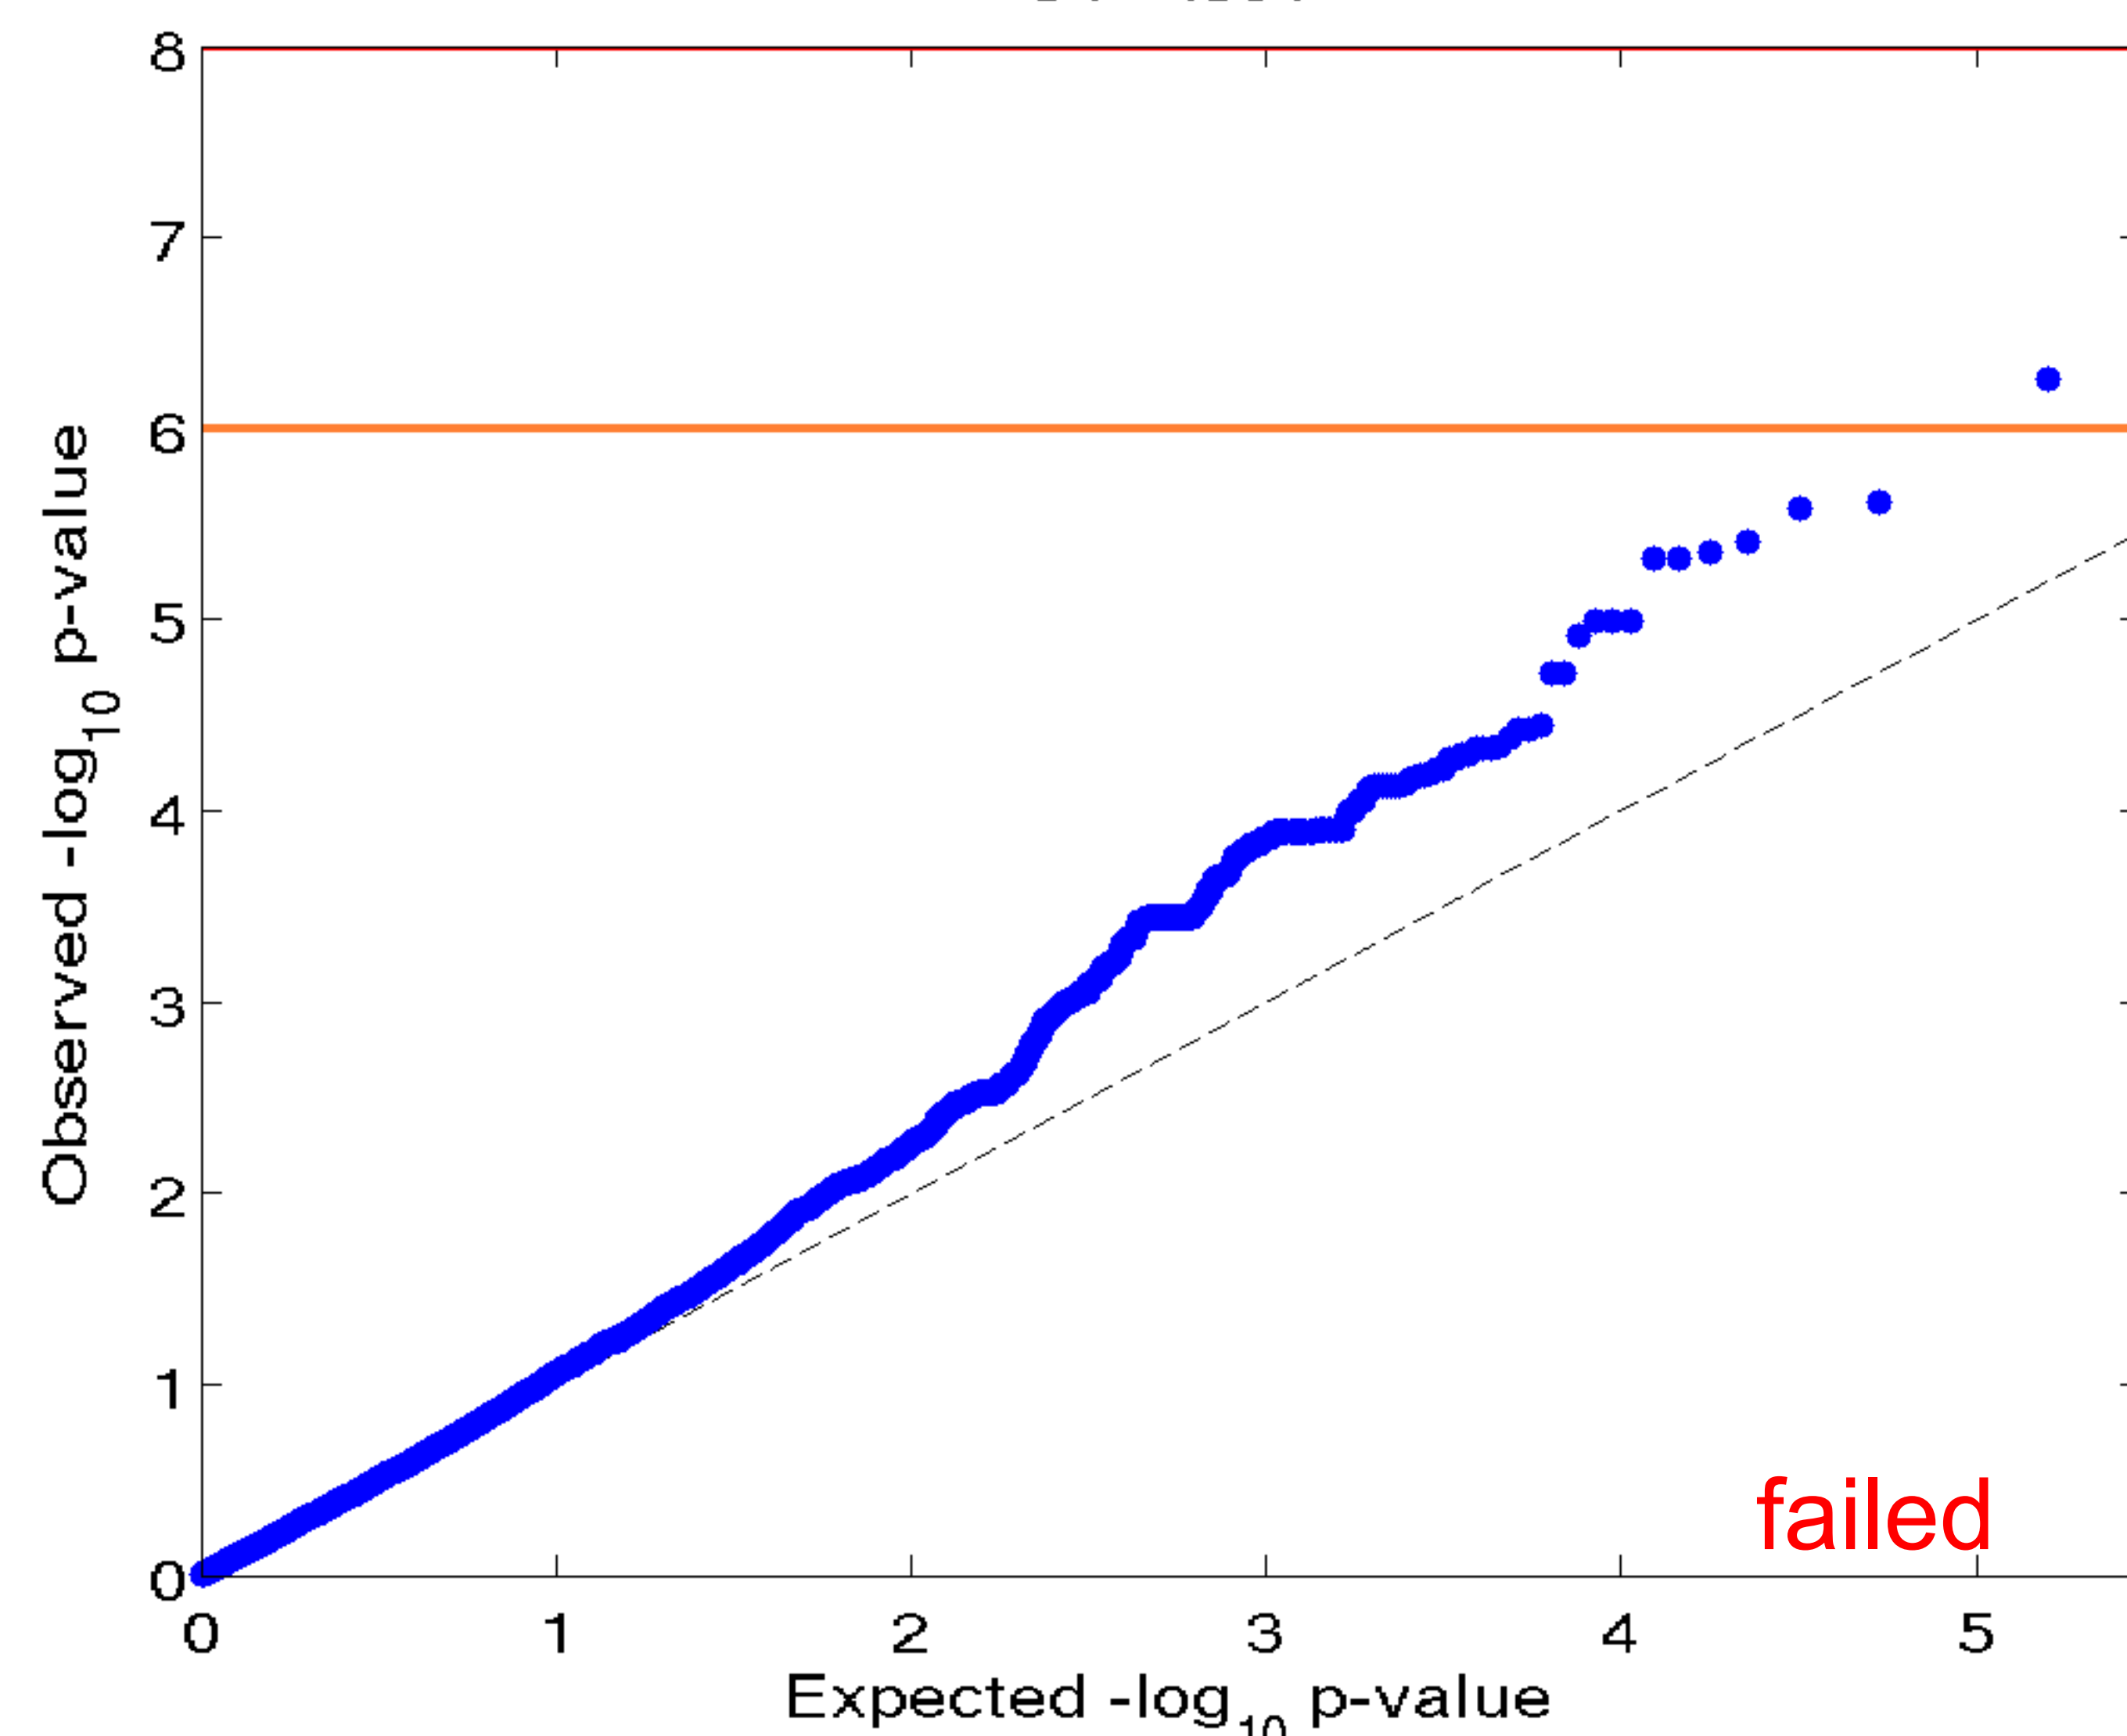

VW/AW - iso1

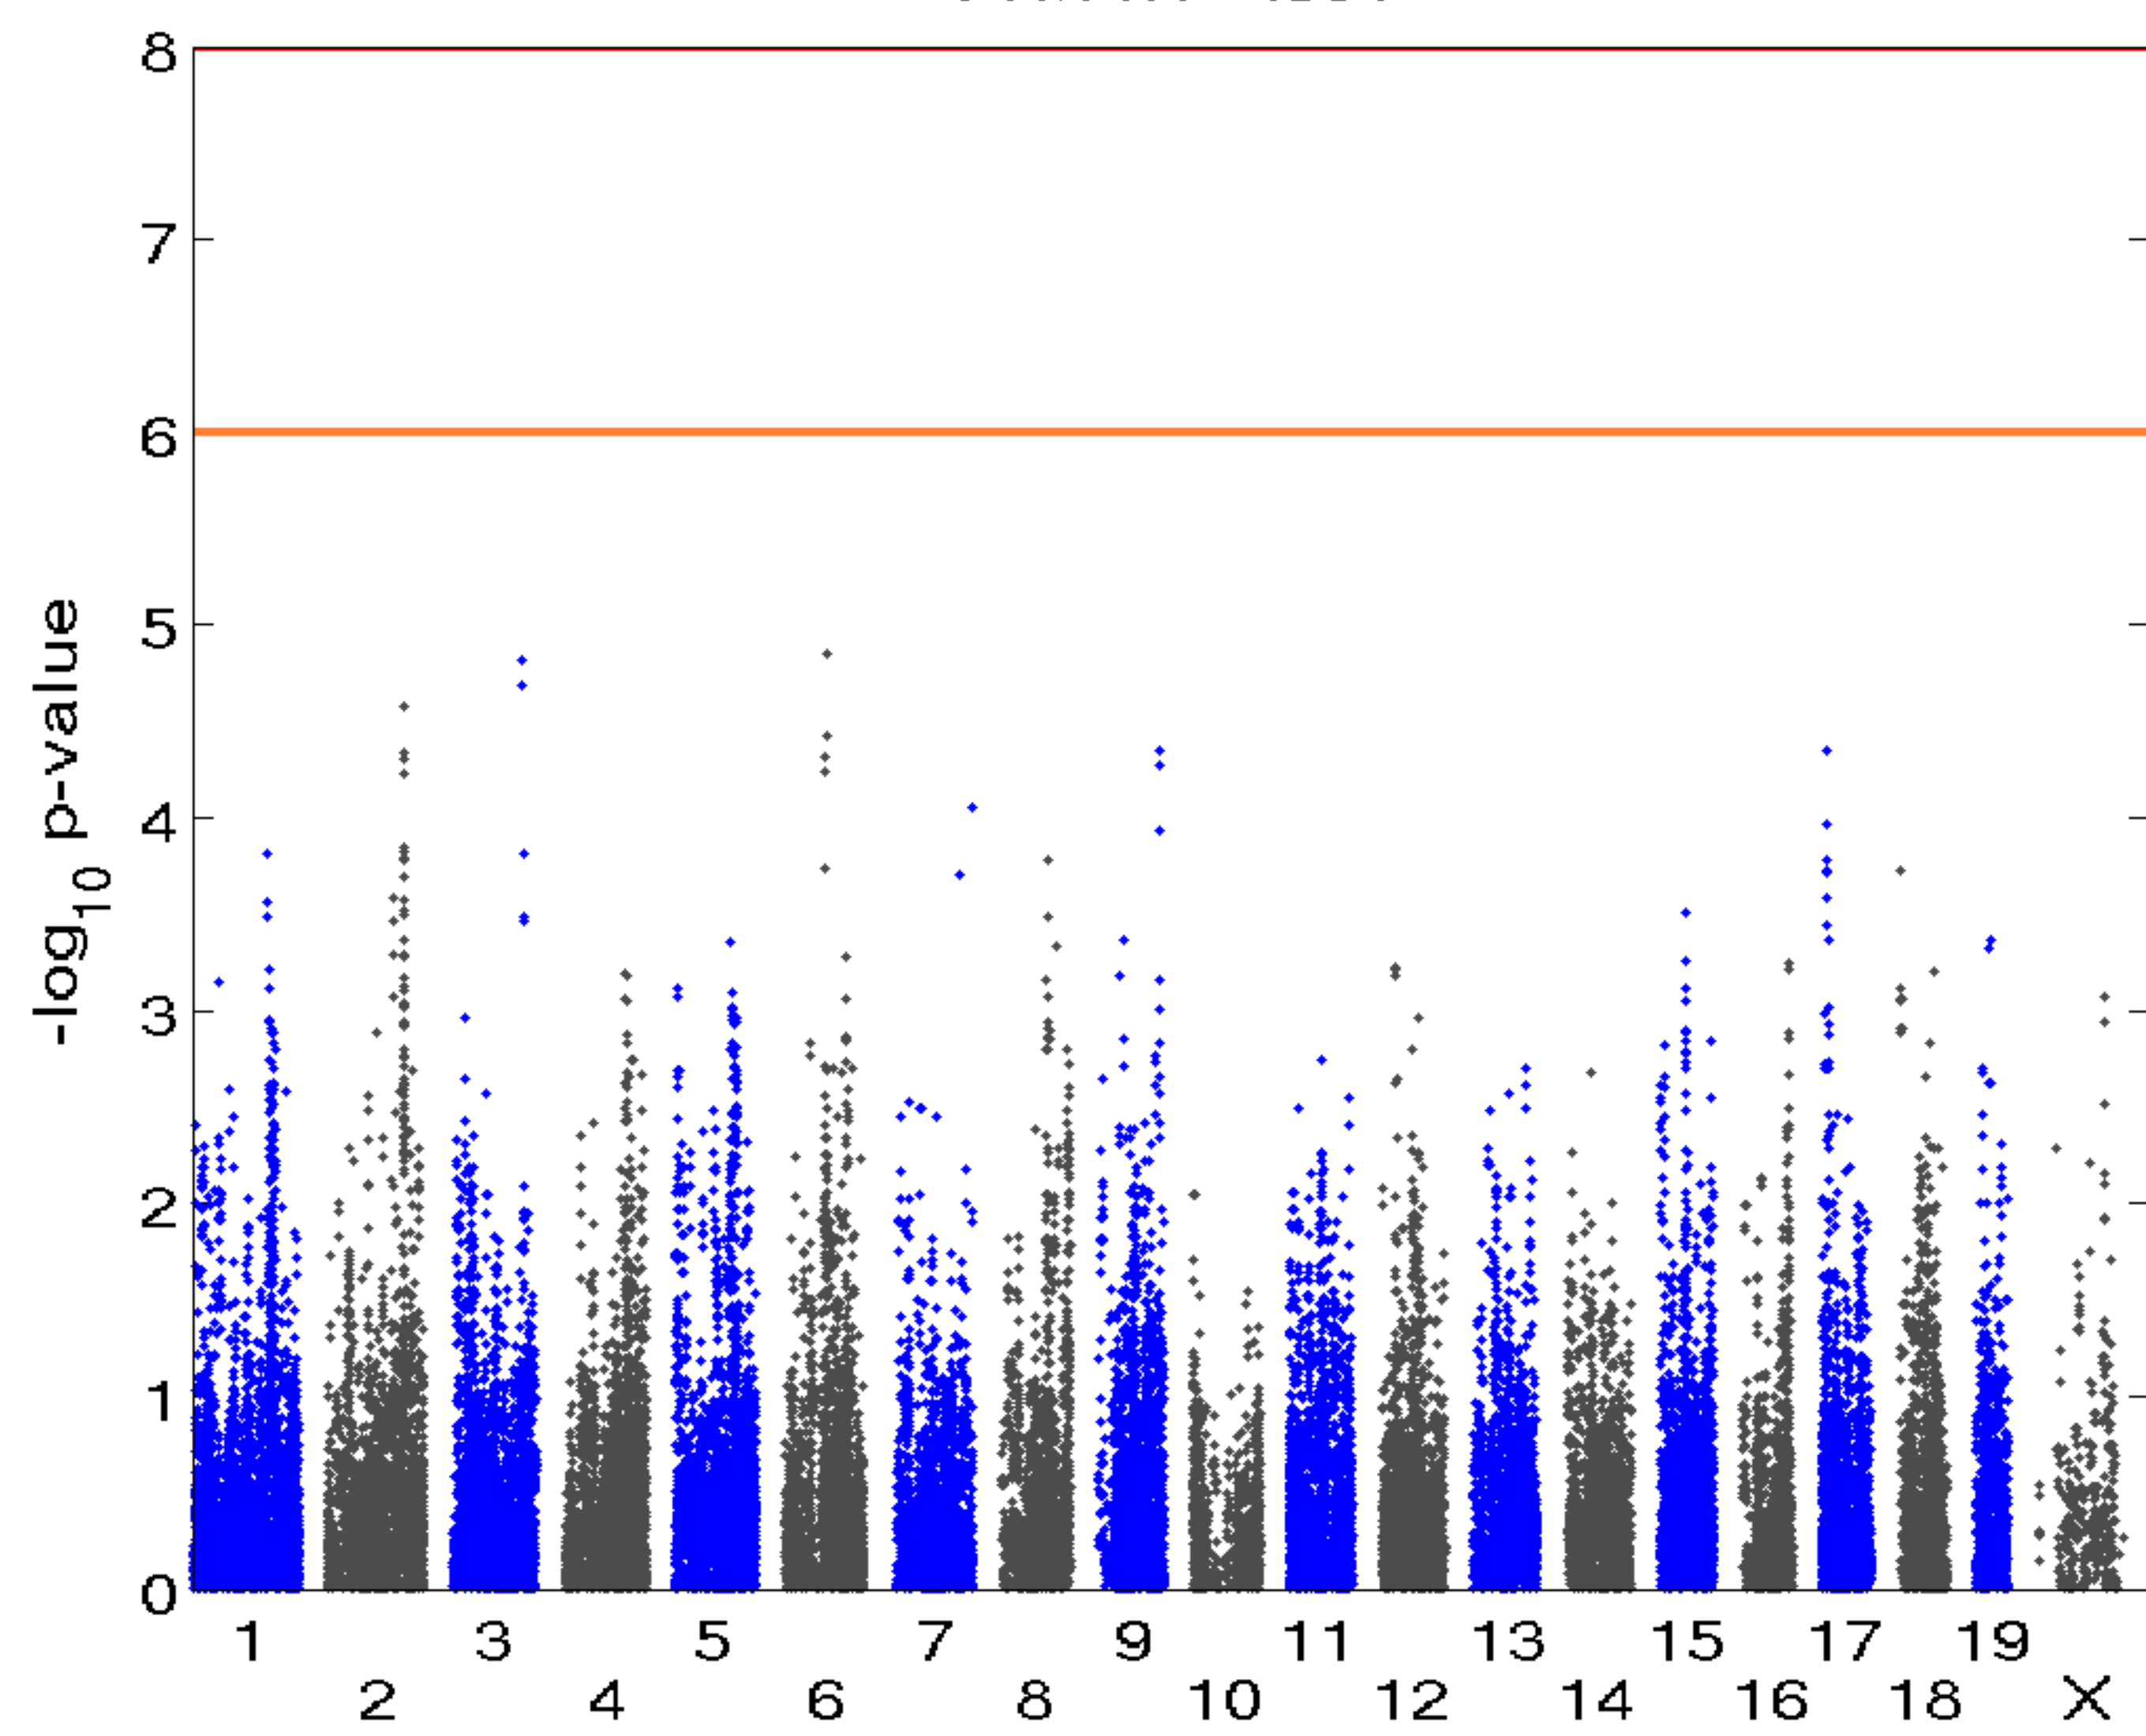

VW/AW - iso1

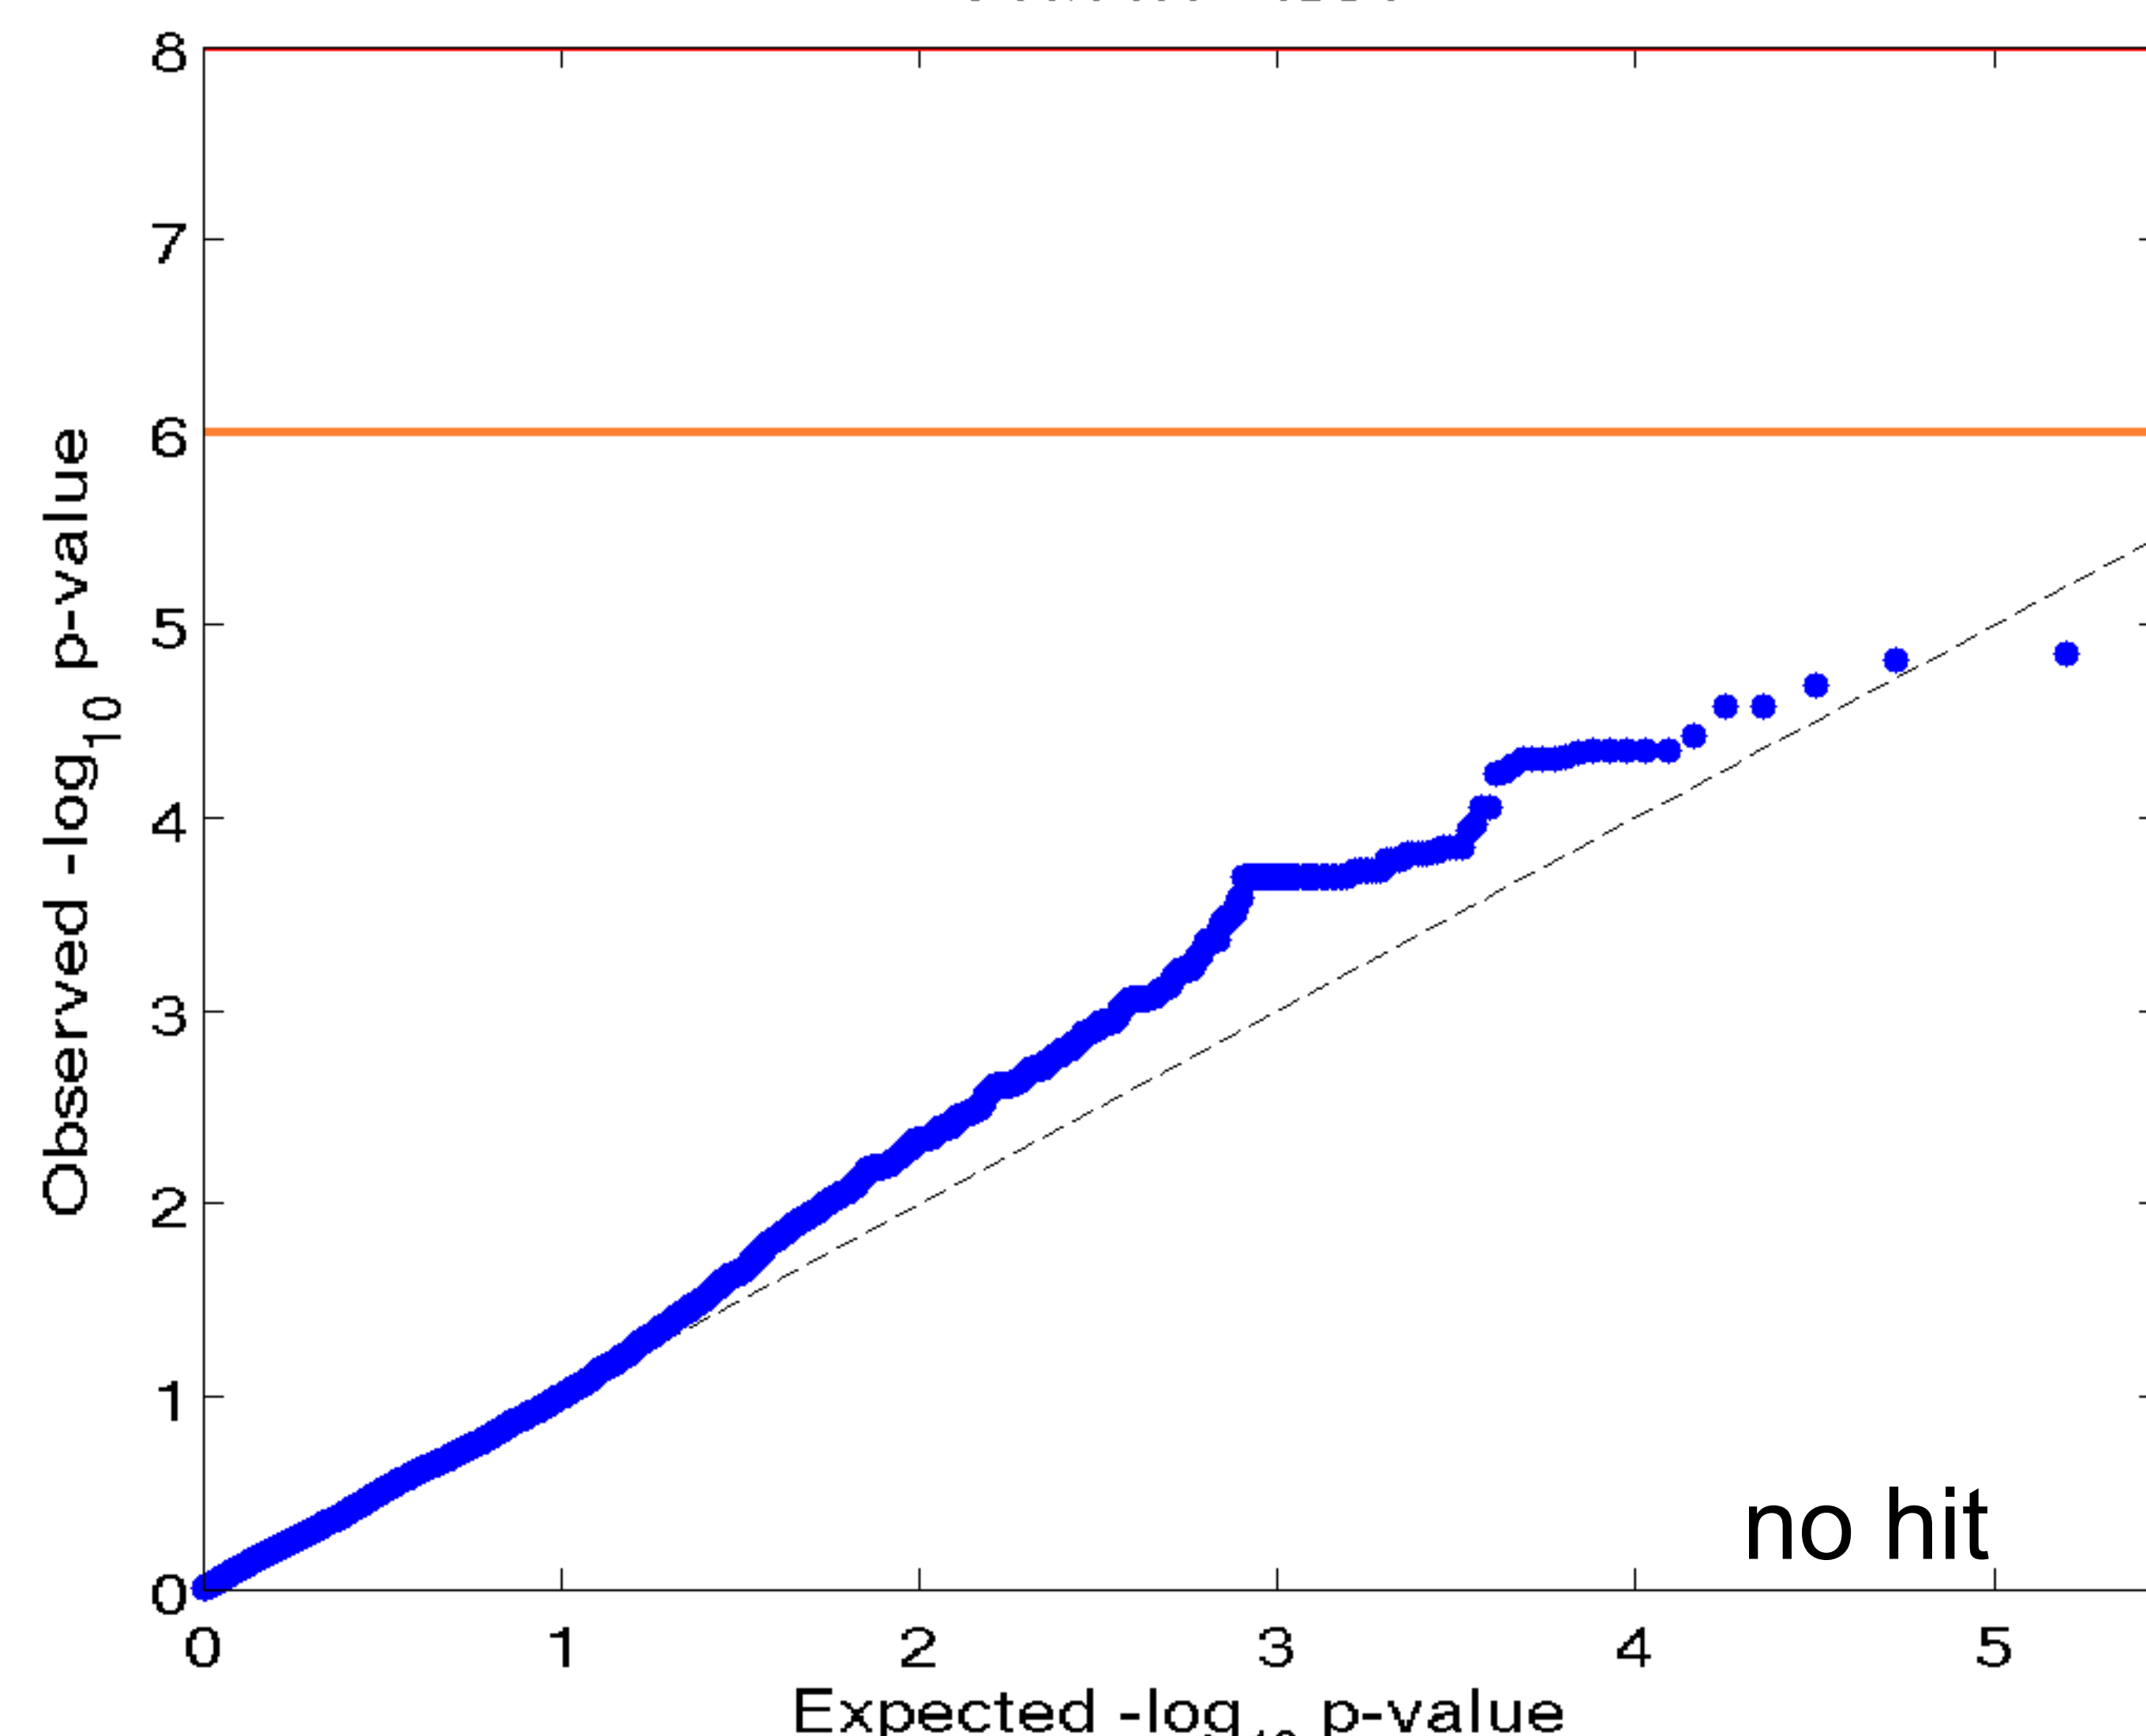

VW/BWS - iso1

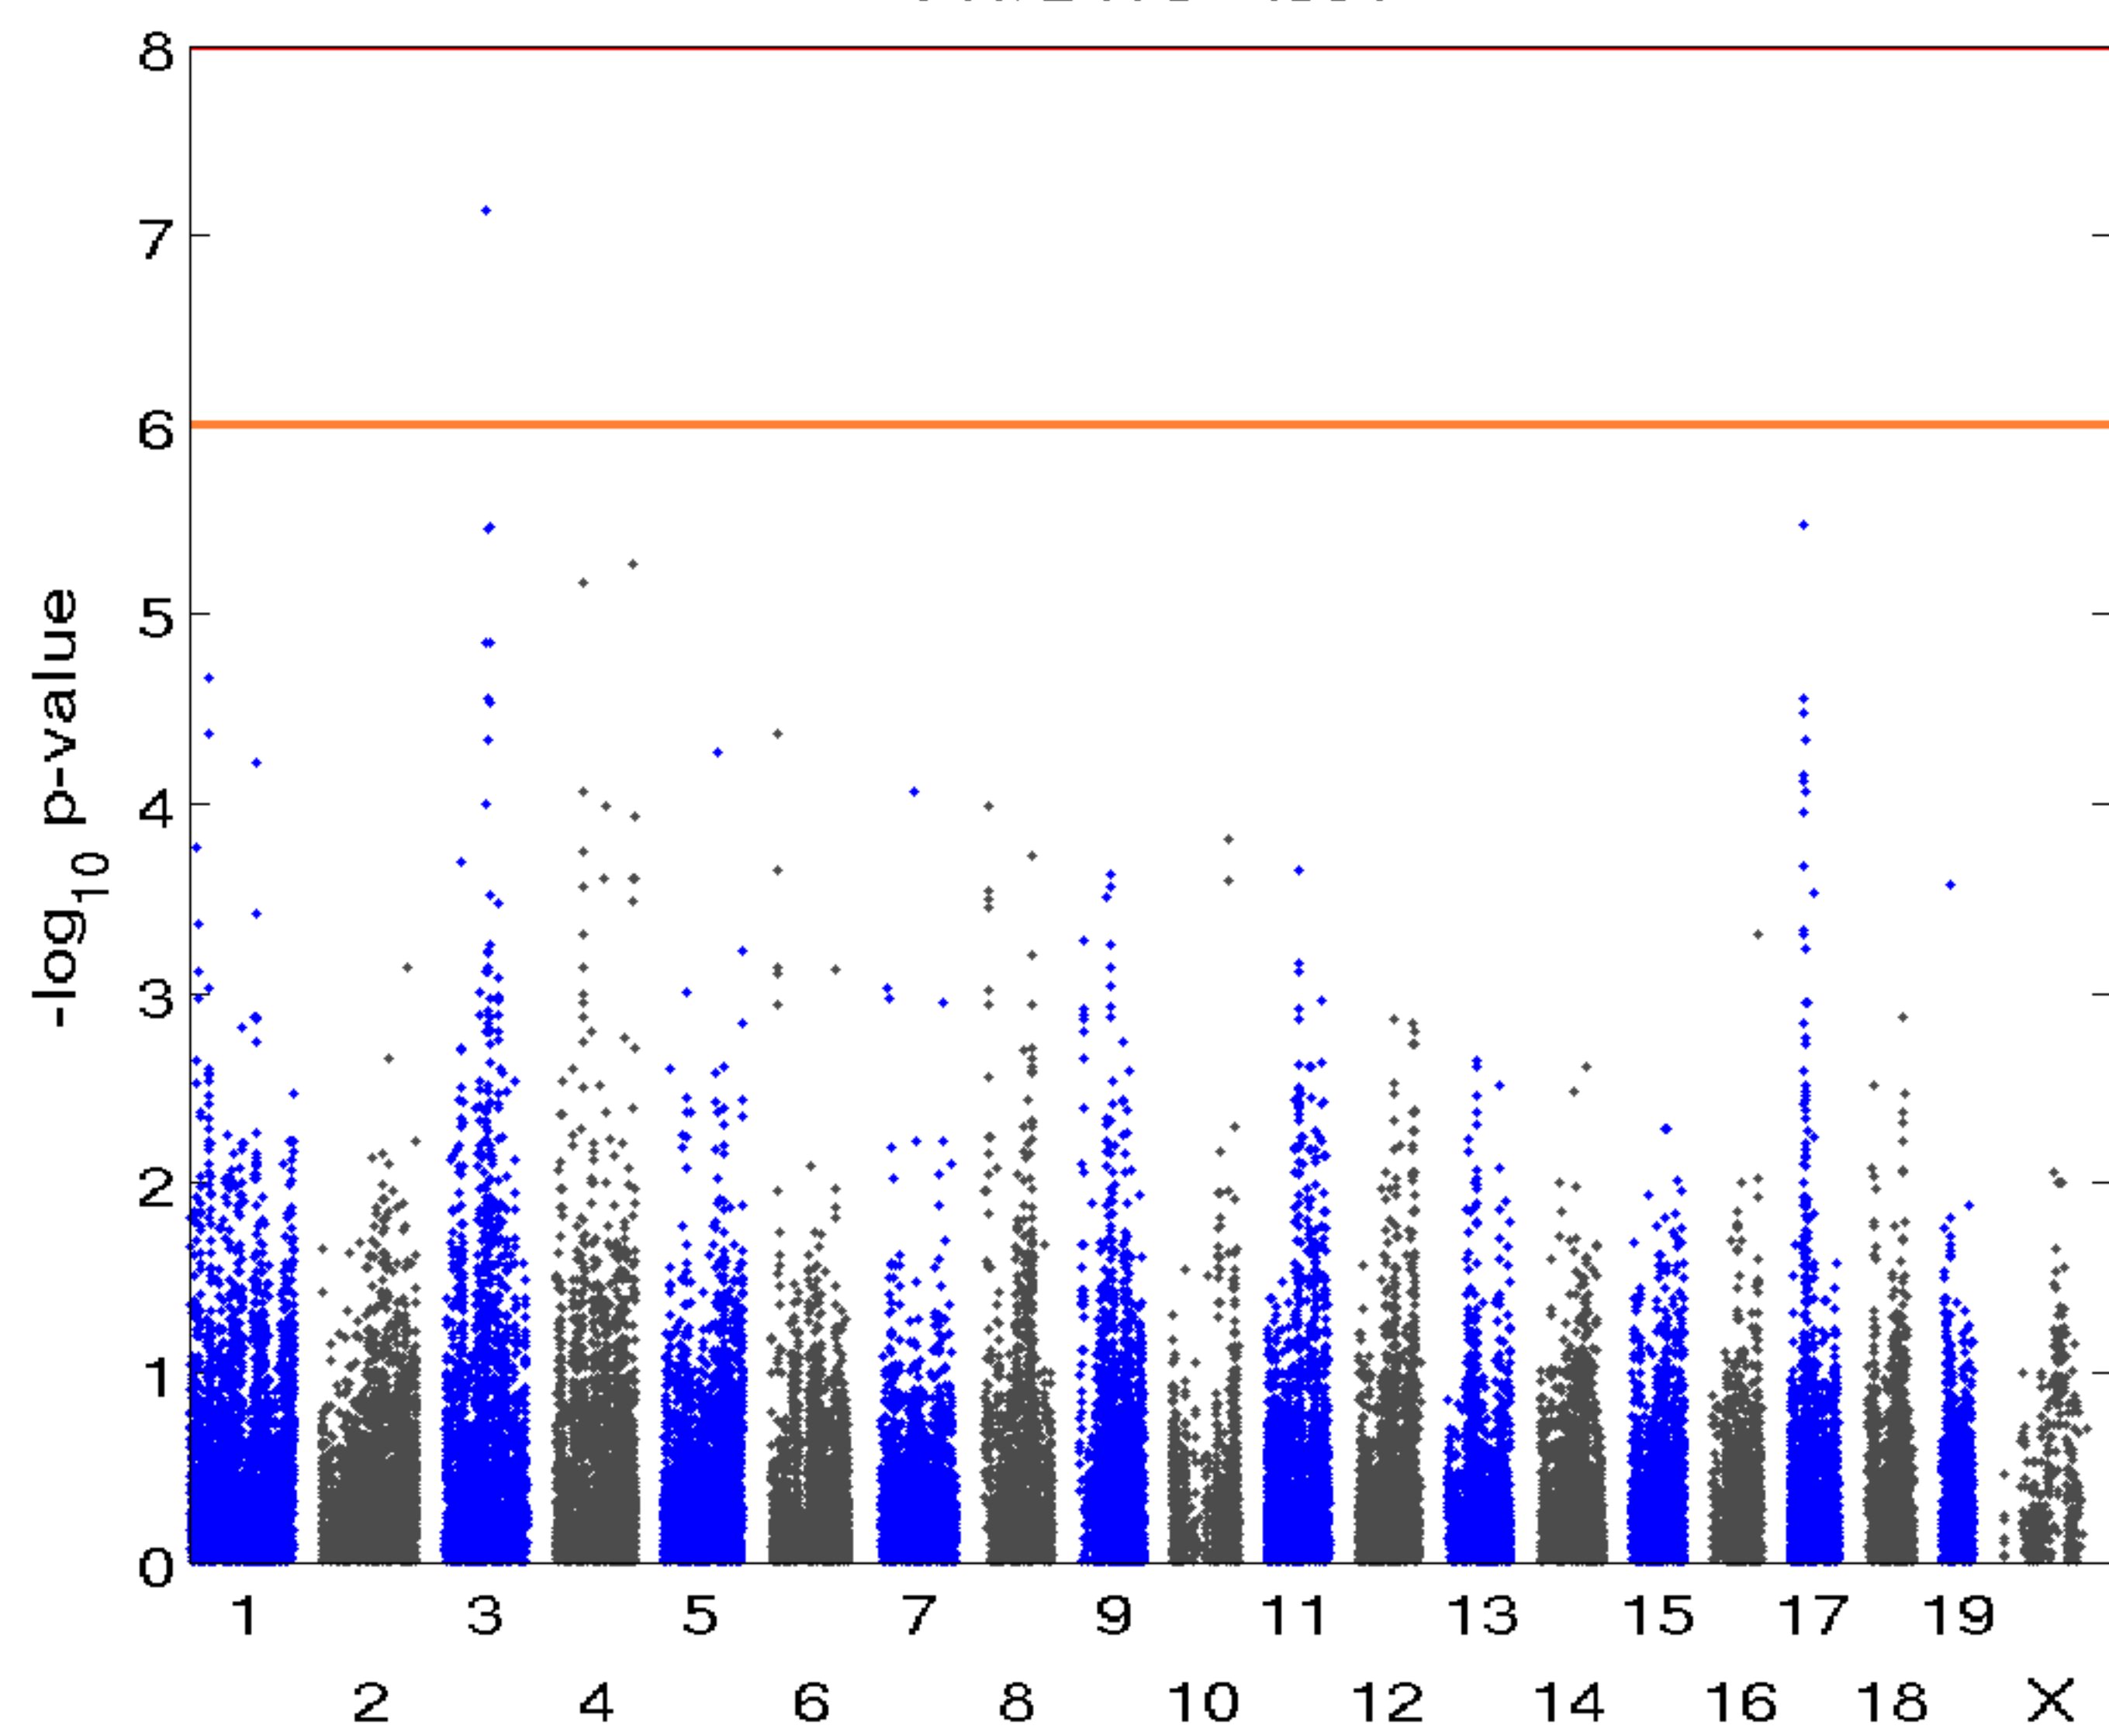

VW/BWS - iso1

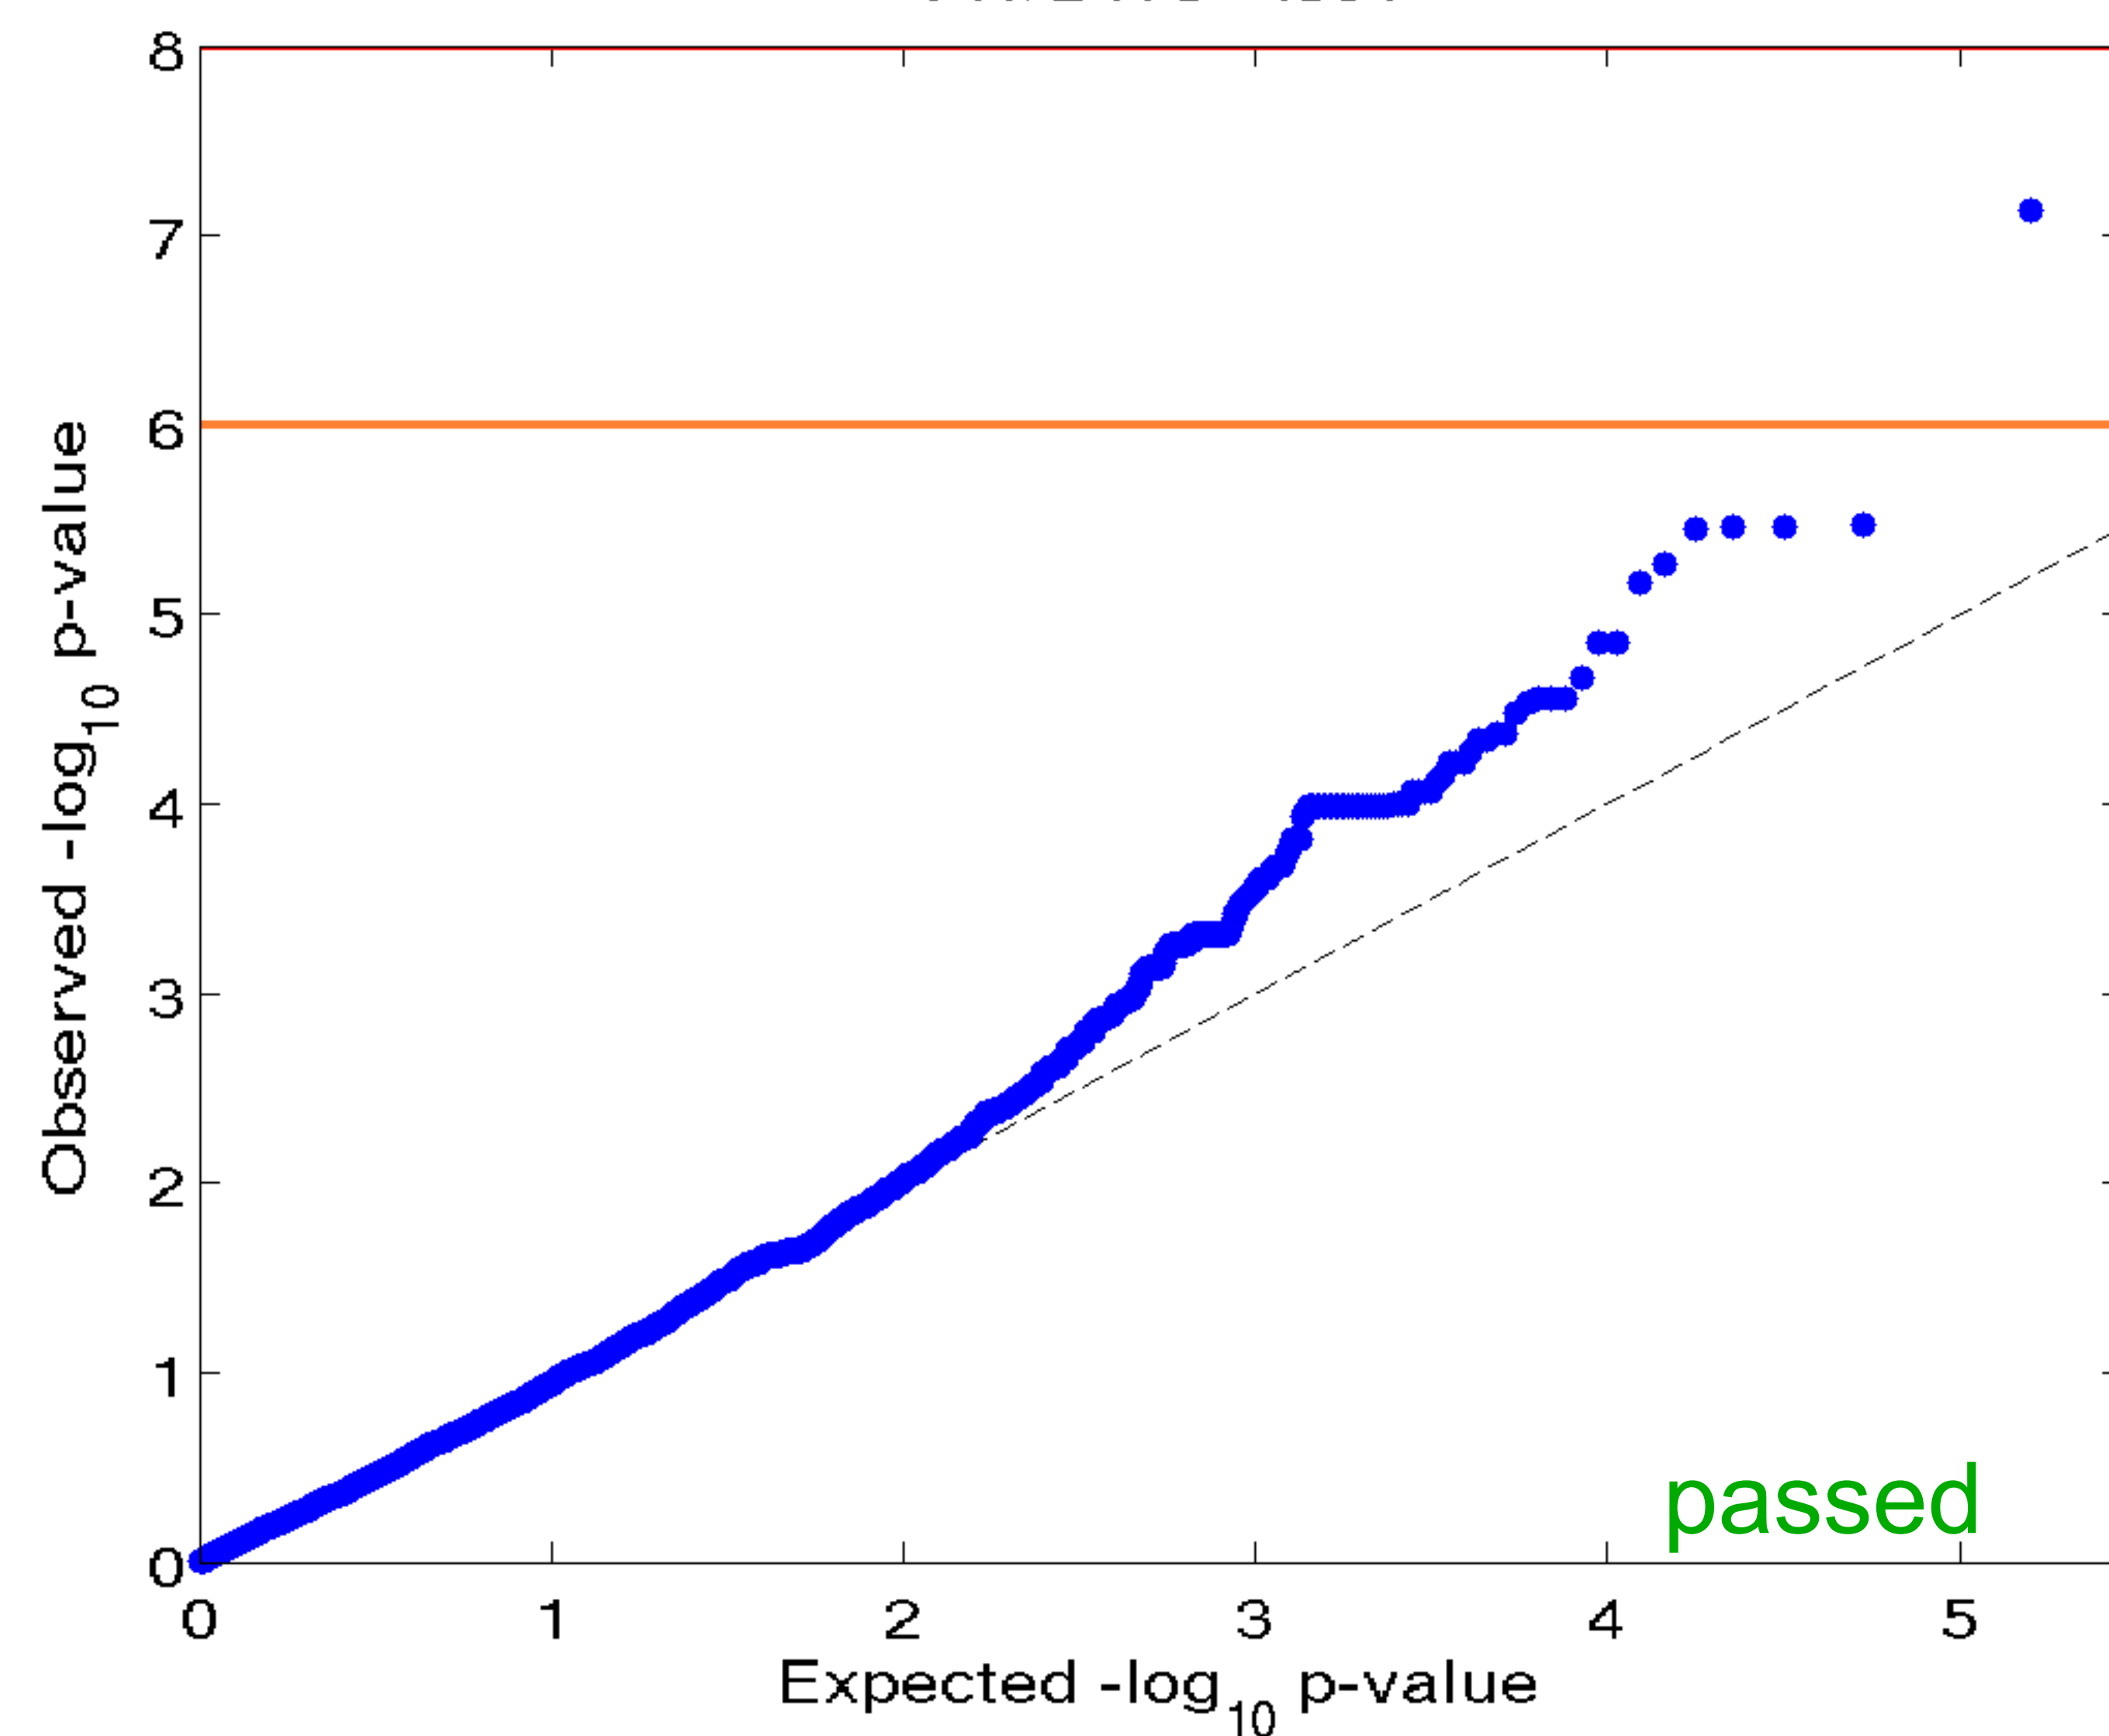

VWI - iso1

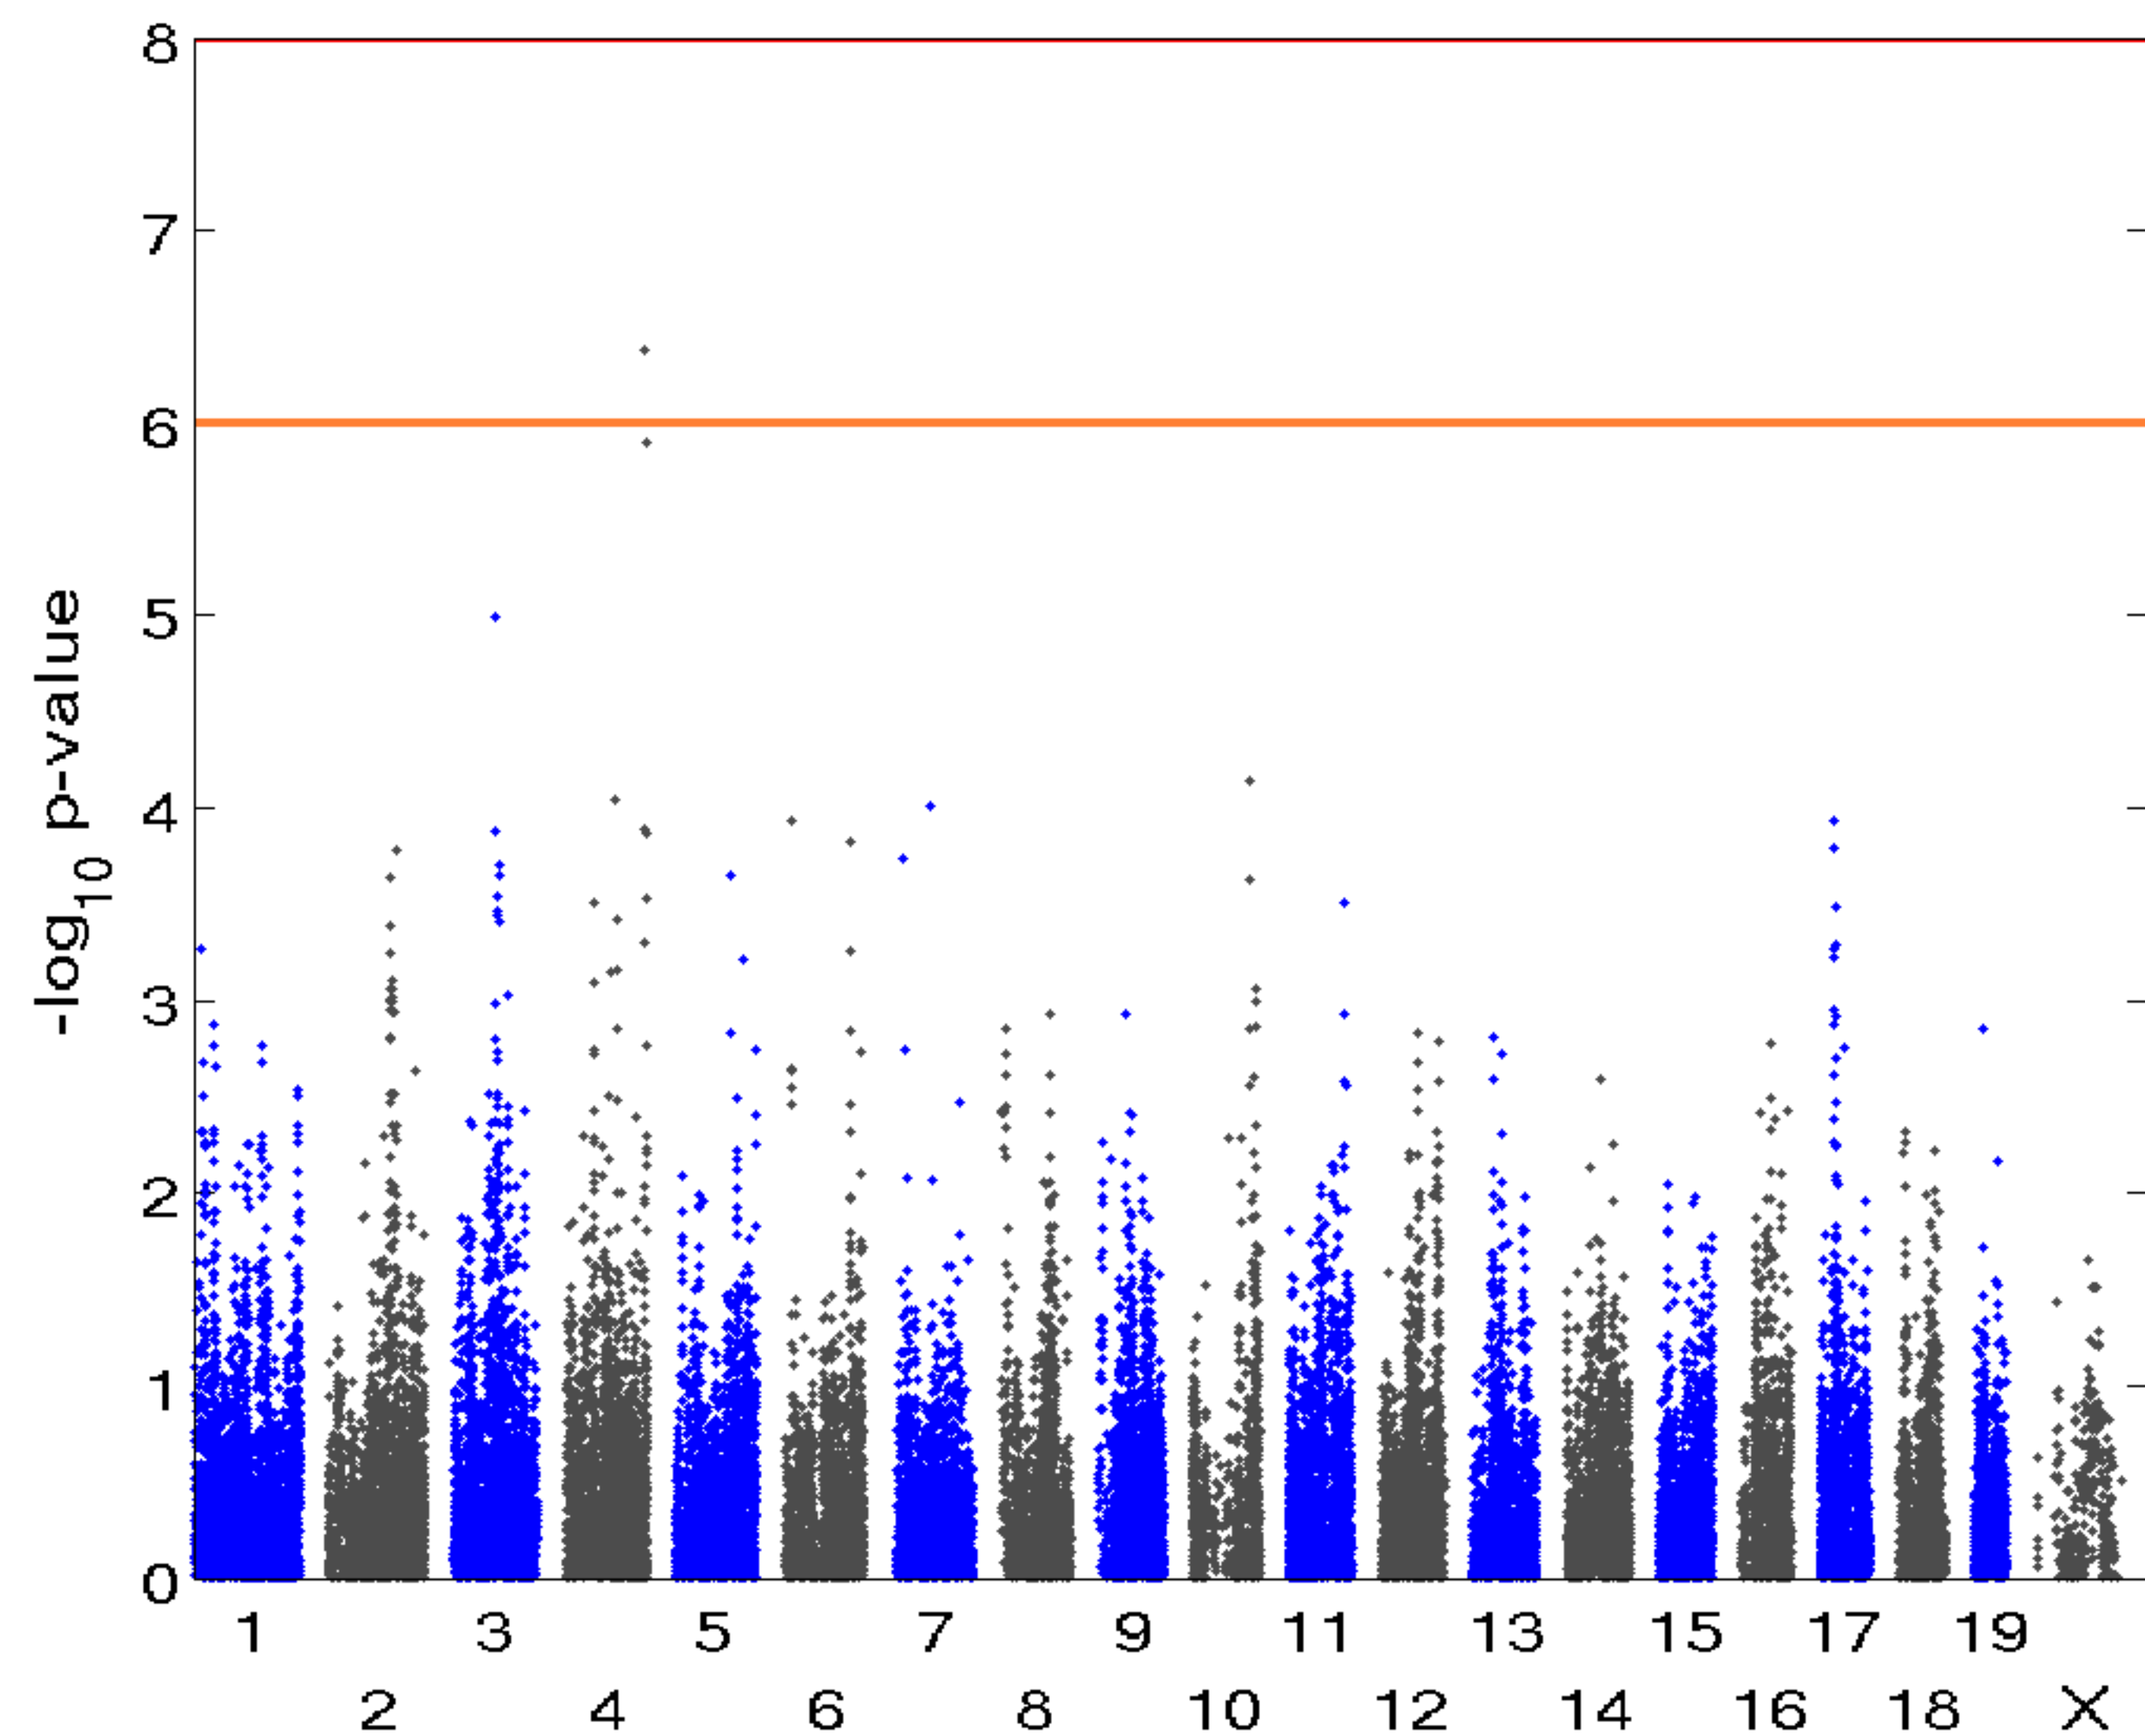

VWI - iso1

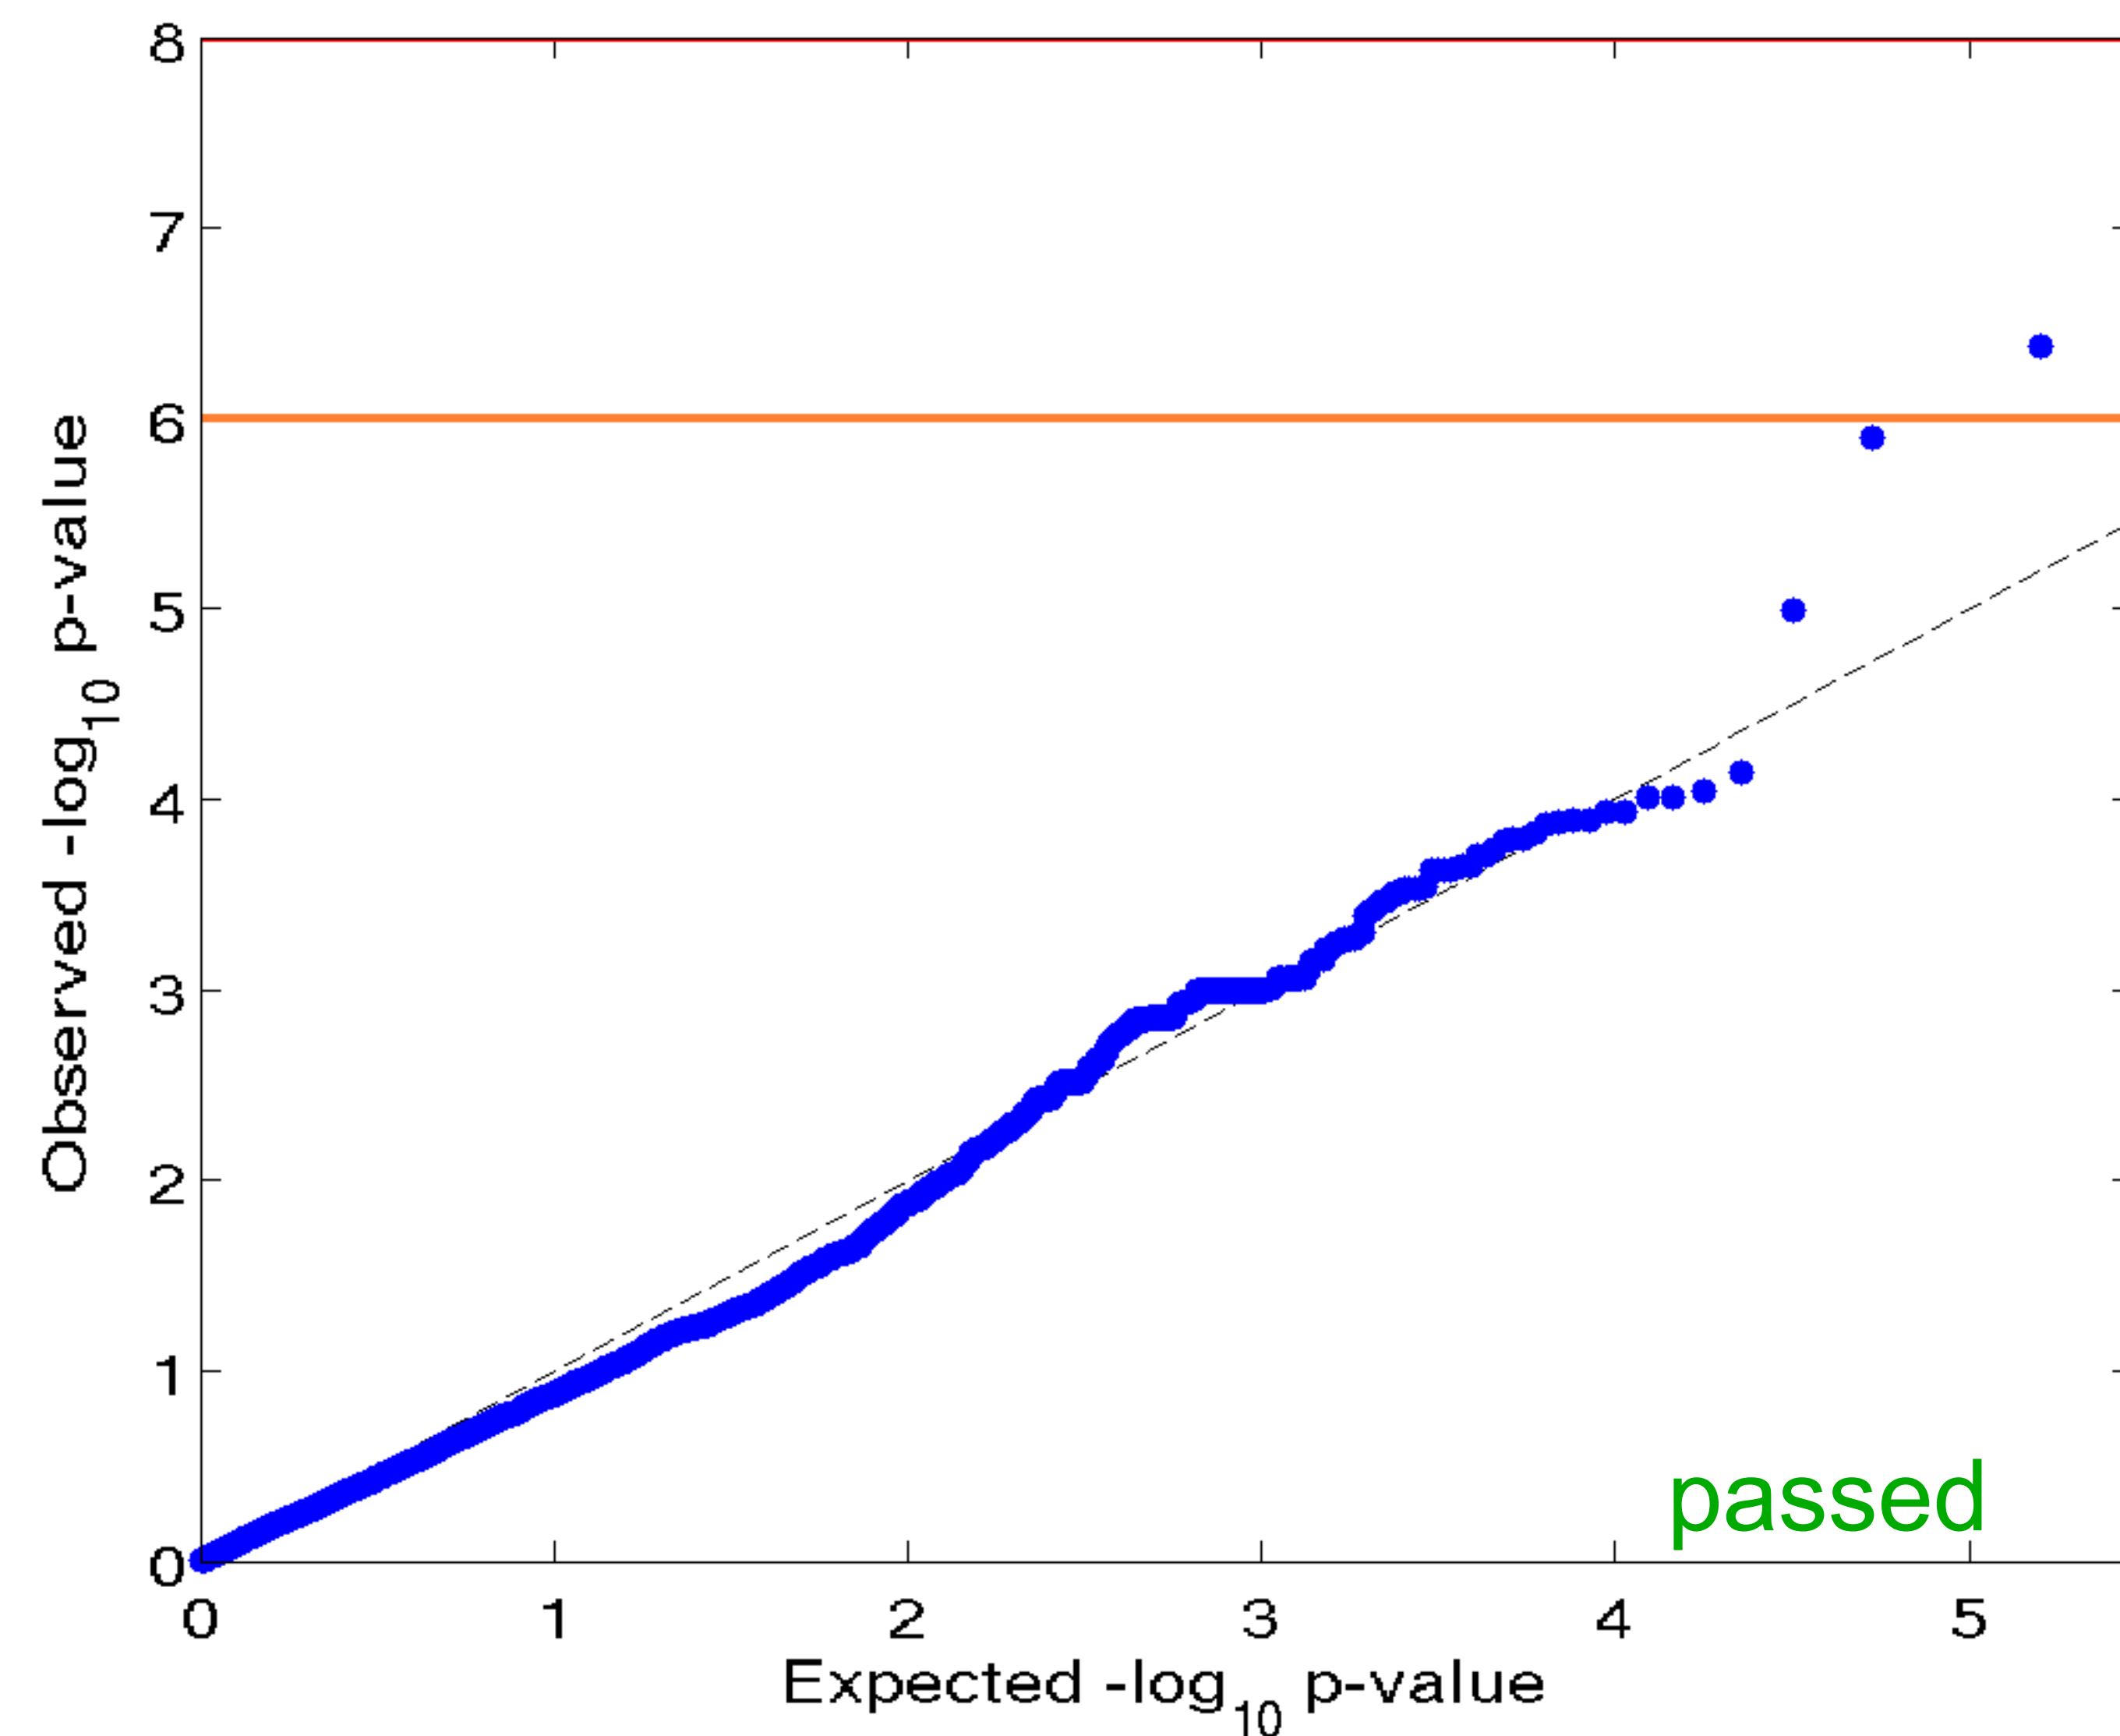

VW - iso1

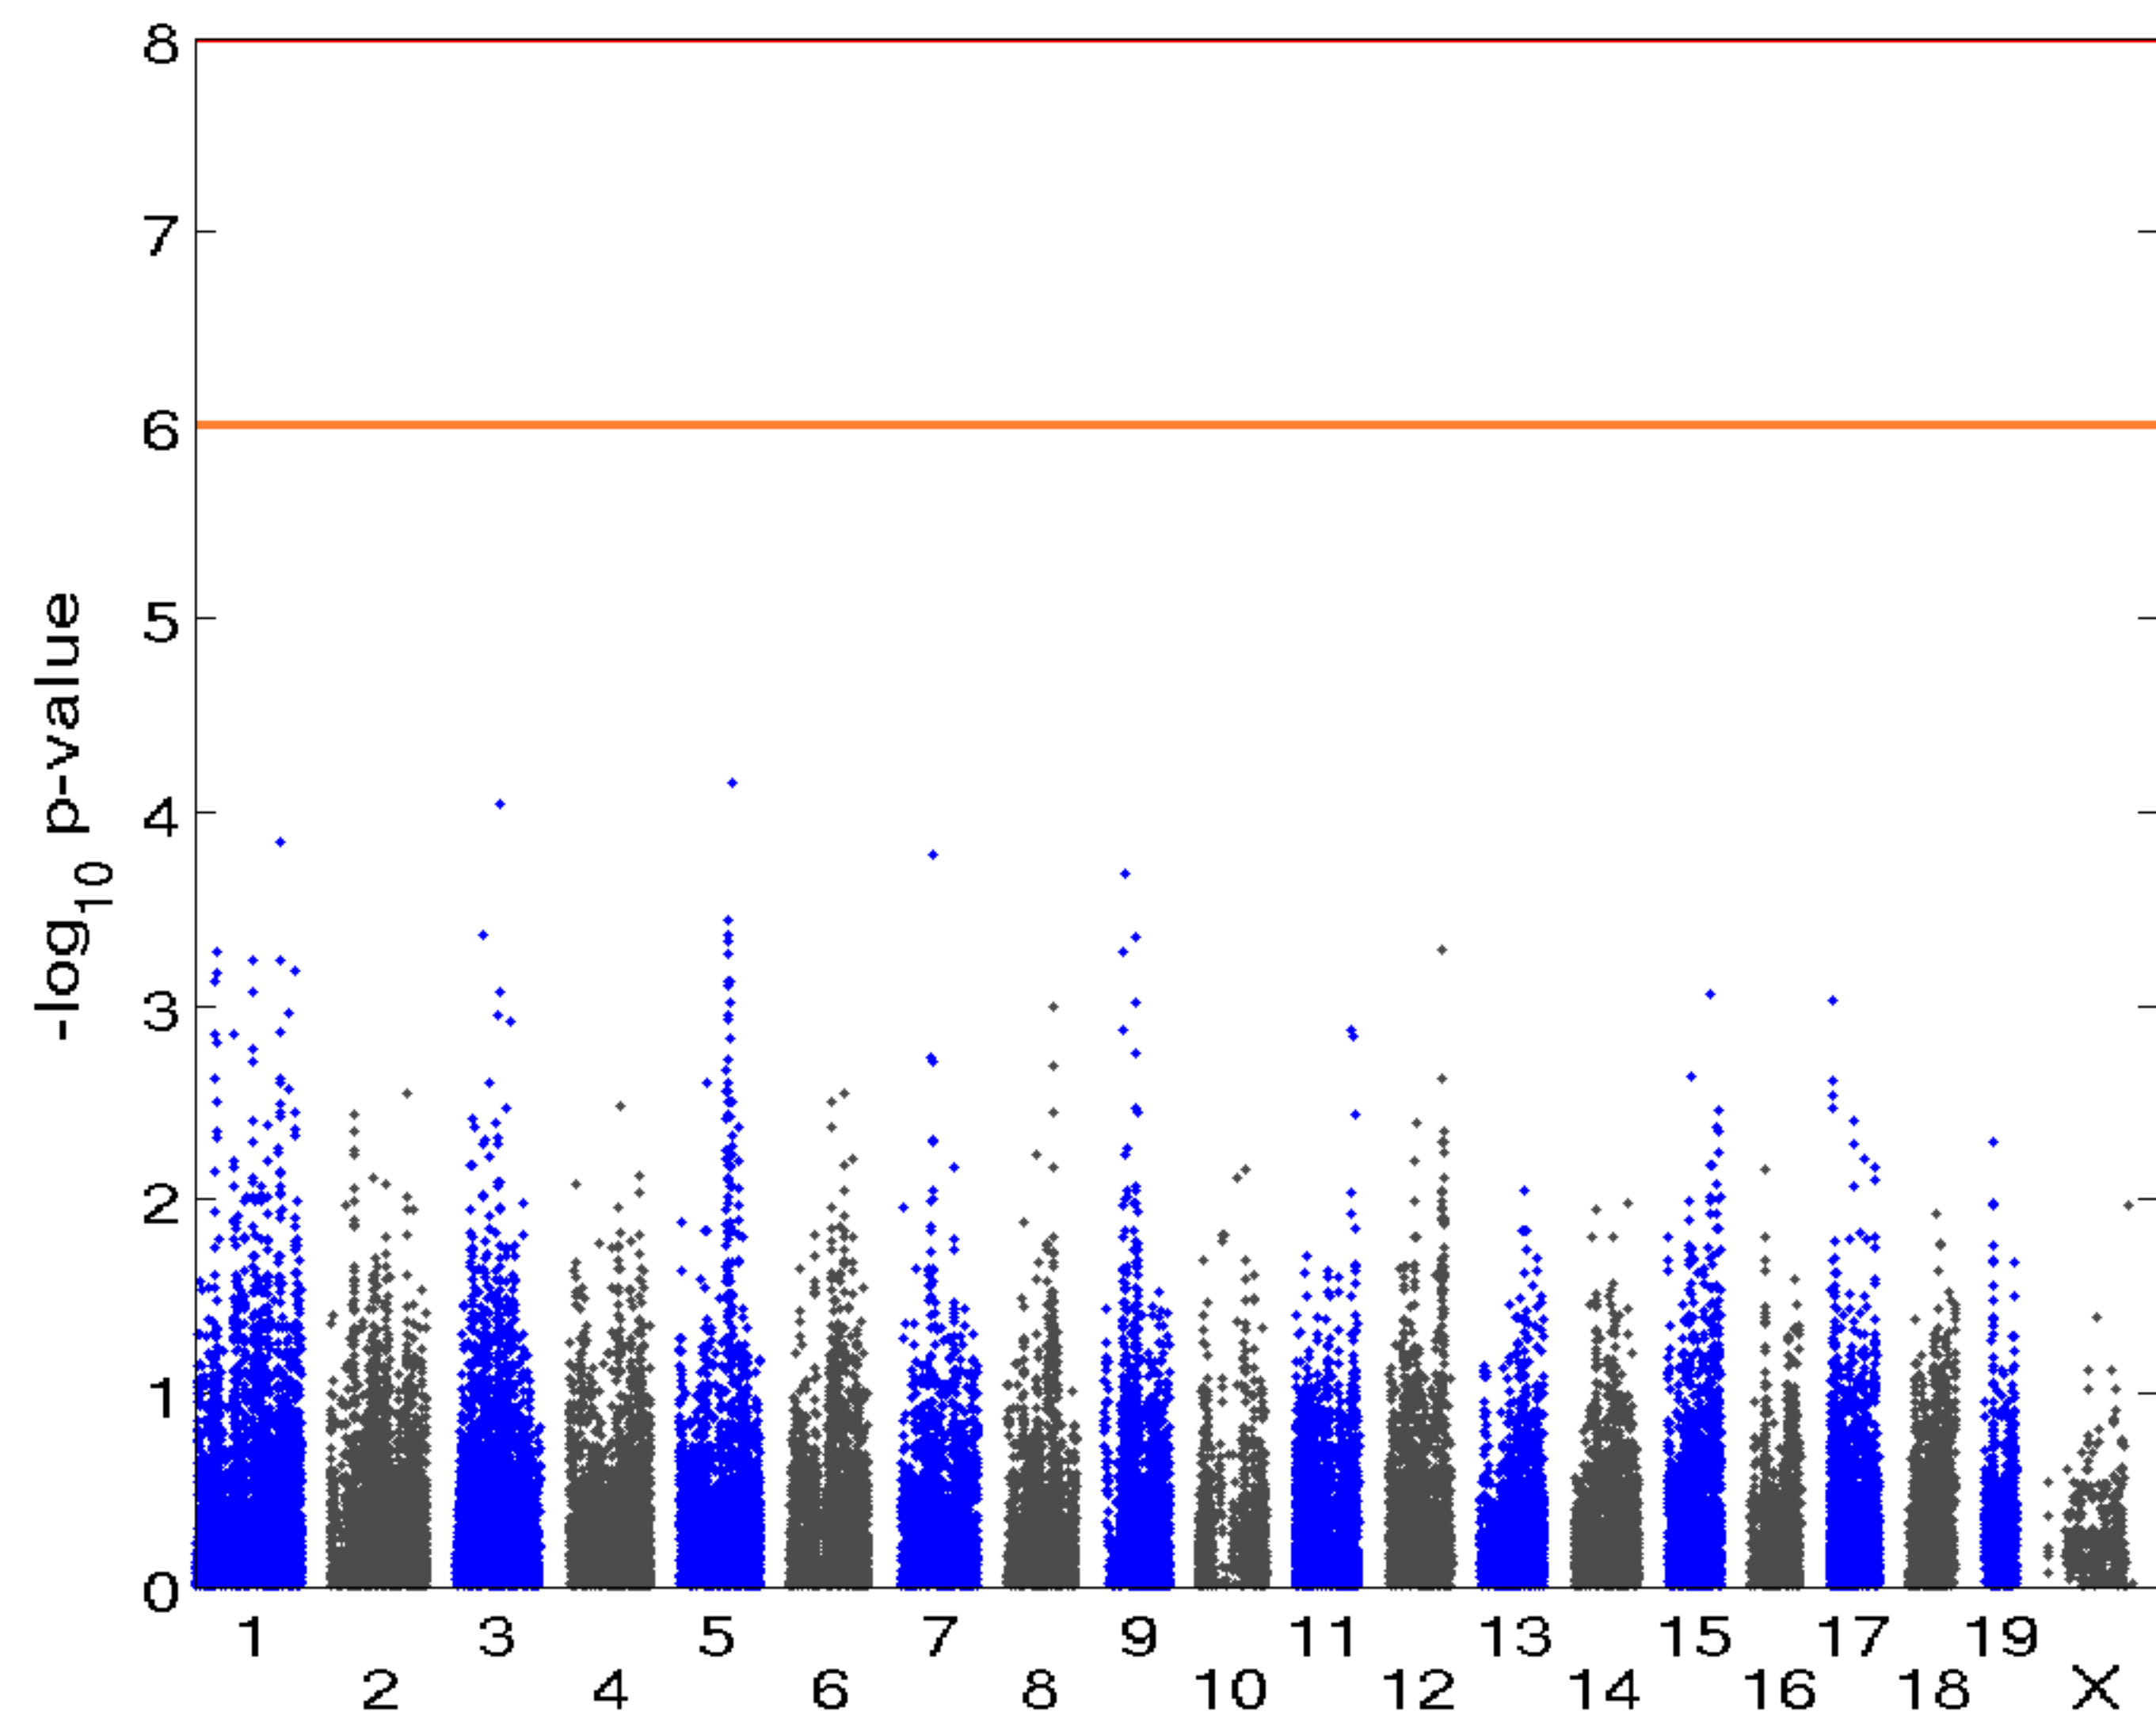

VW - iso1

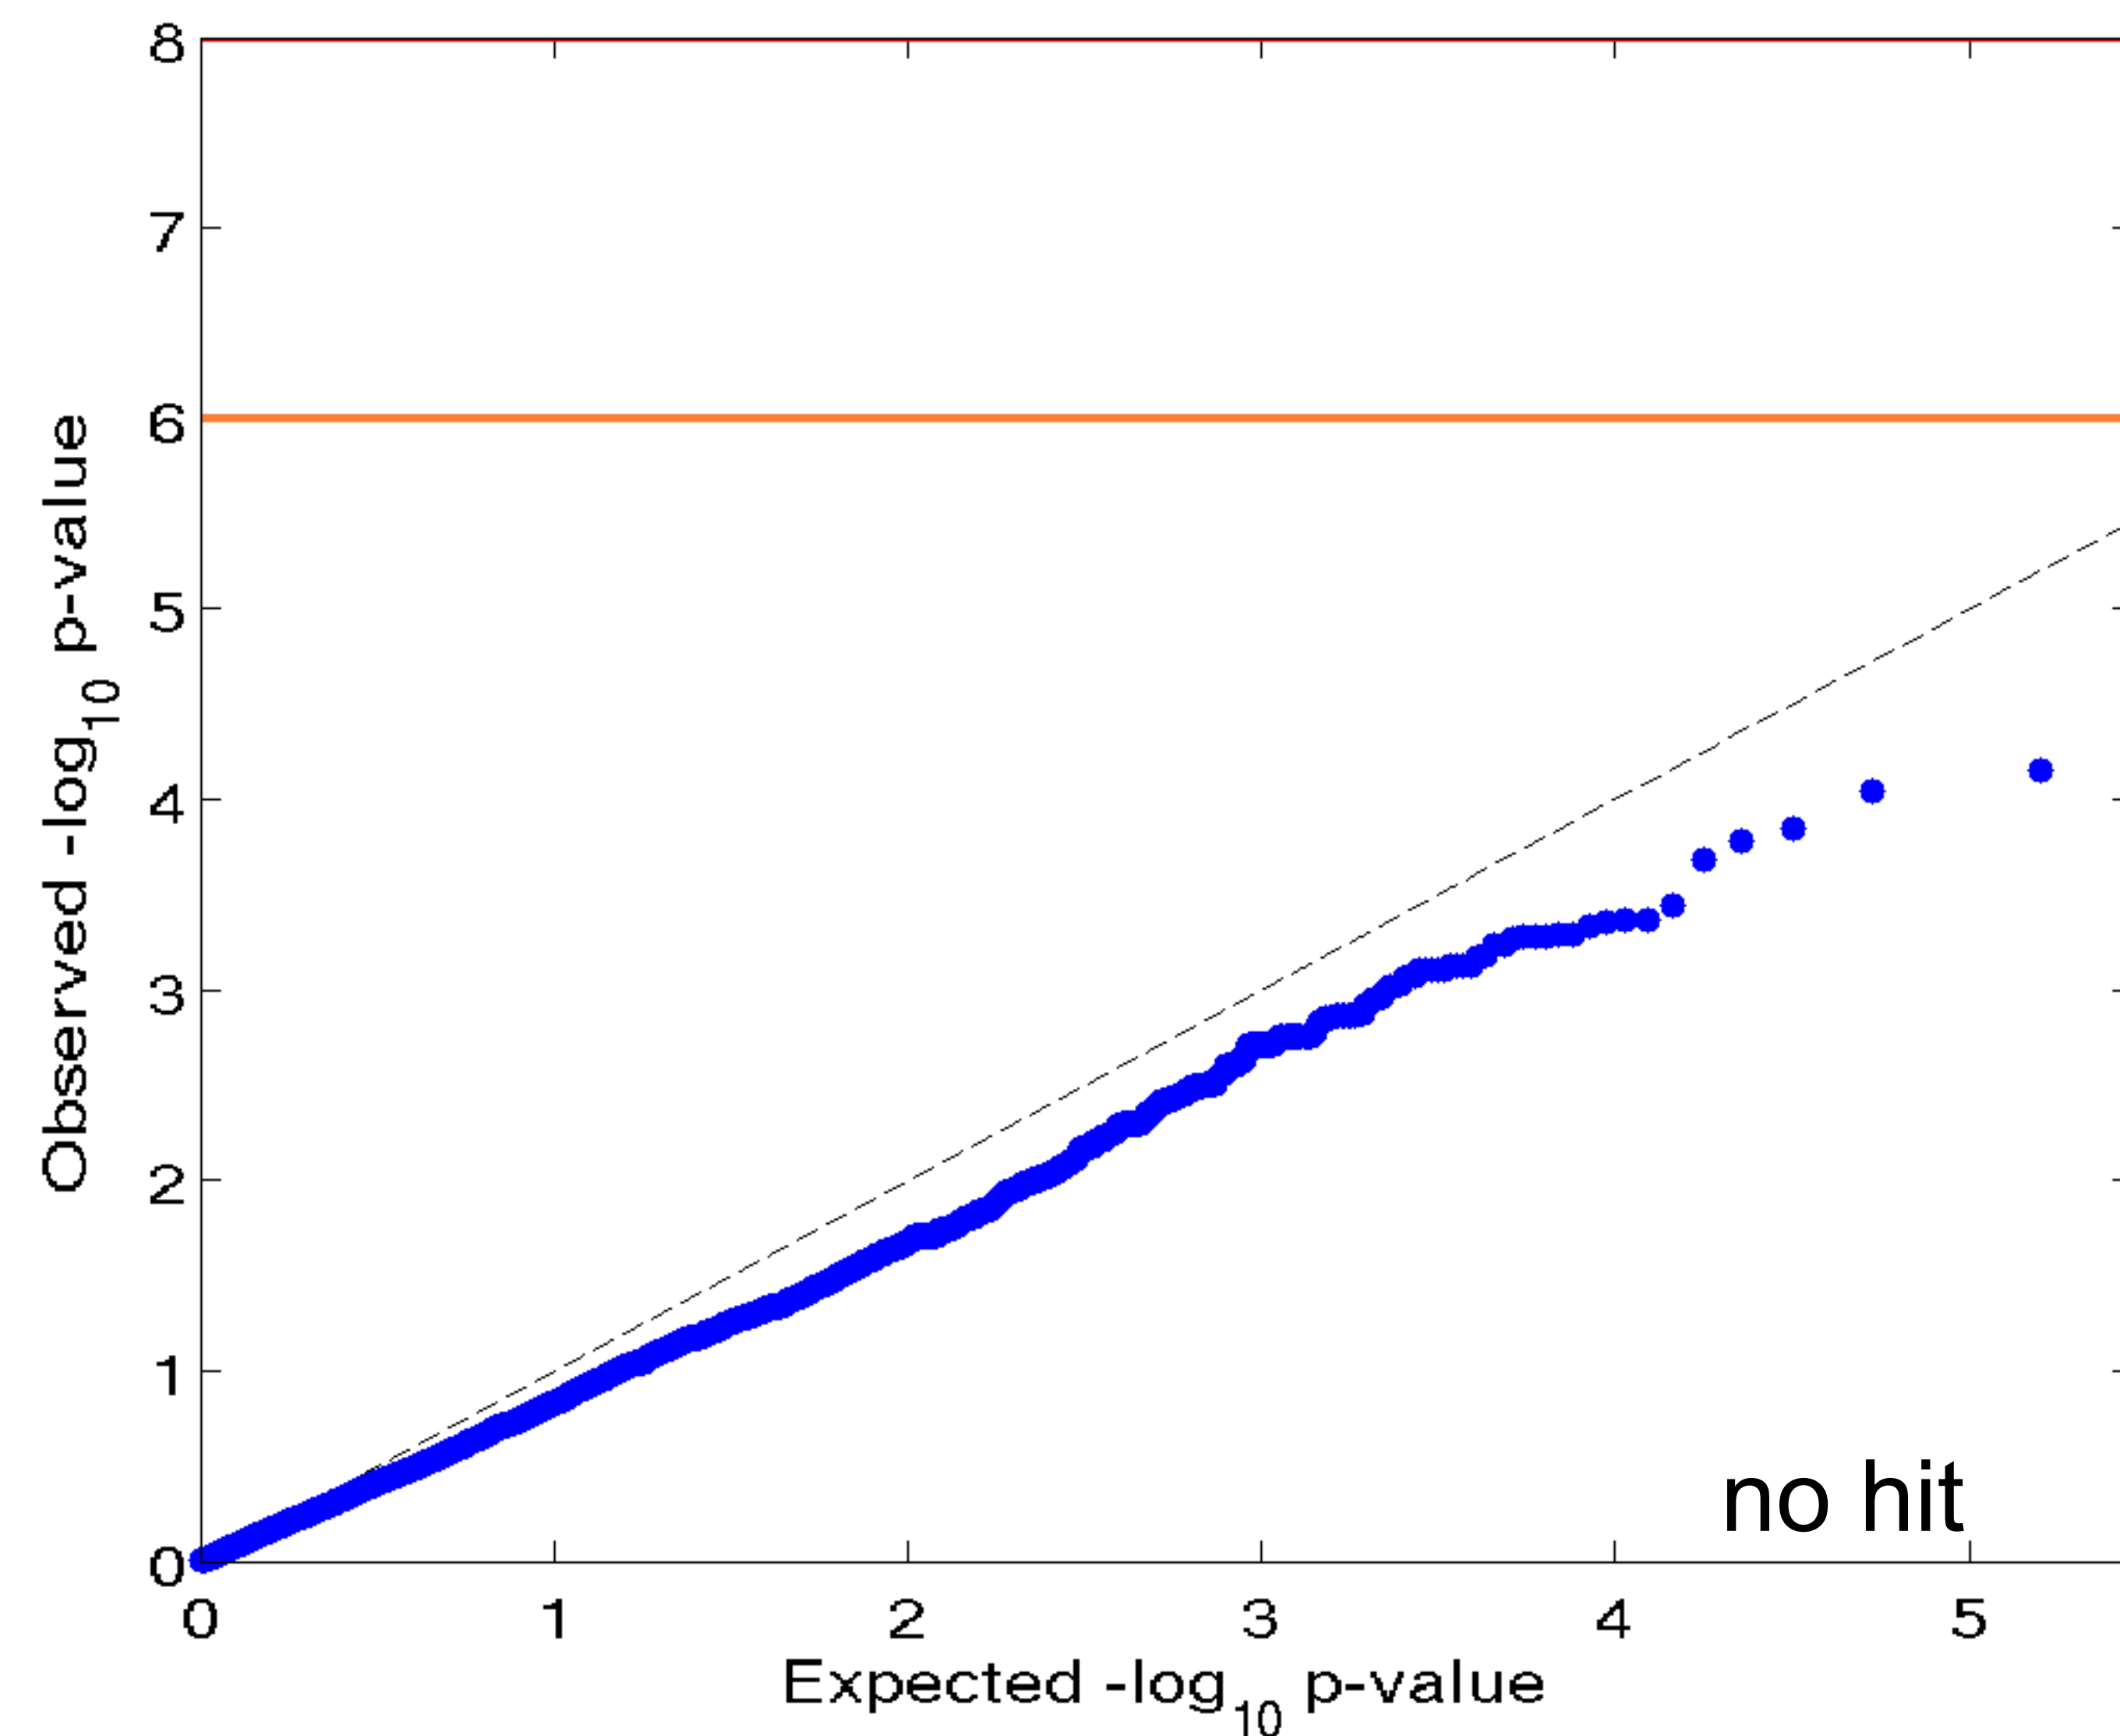

Supplement: S3 (10.1371/journal.pone.0041032.s003) [file journal.pone.0041032.s003]
