# Supplementary material for: Mapping Genetic Variants Associated with Beta-Adrenergic Responses in Inbred Mice
Source: PLOS journal article supplement (doi:10.1371/journal.pone.0041032), 2012-07-31

AW/BWS - iso10

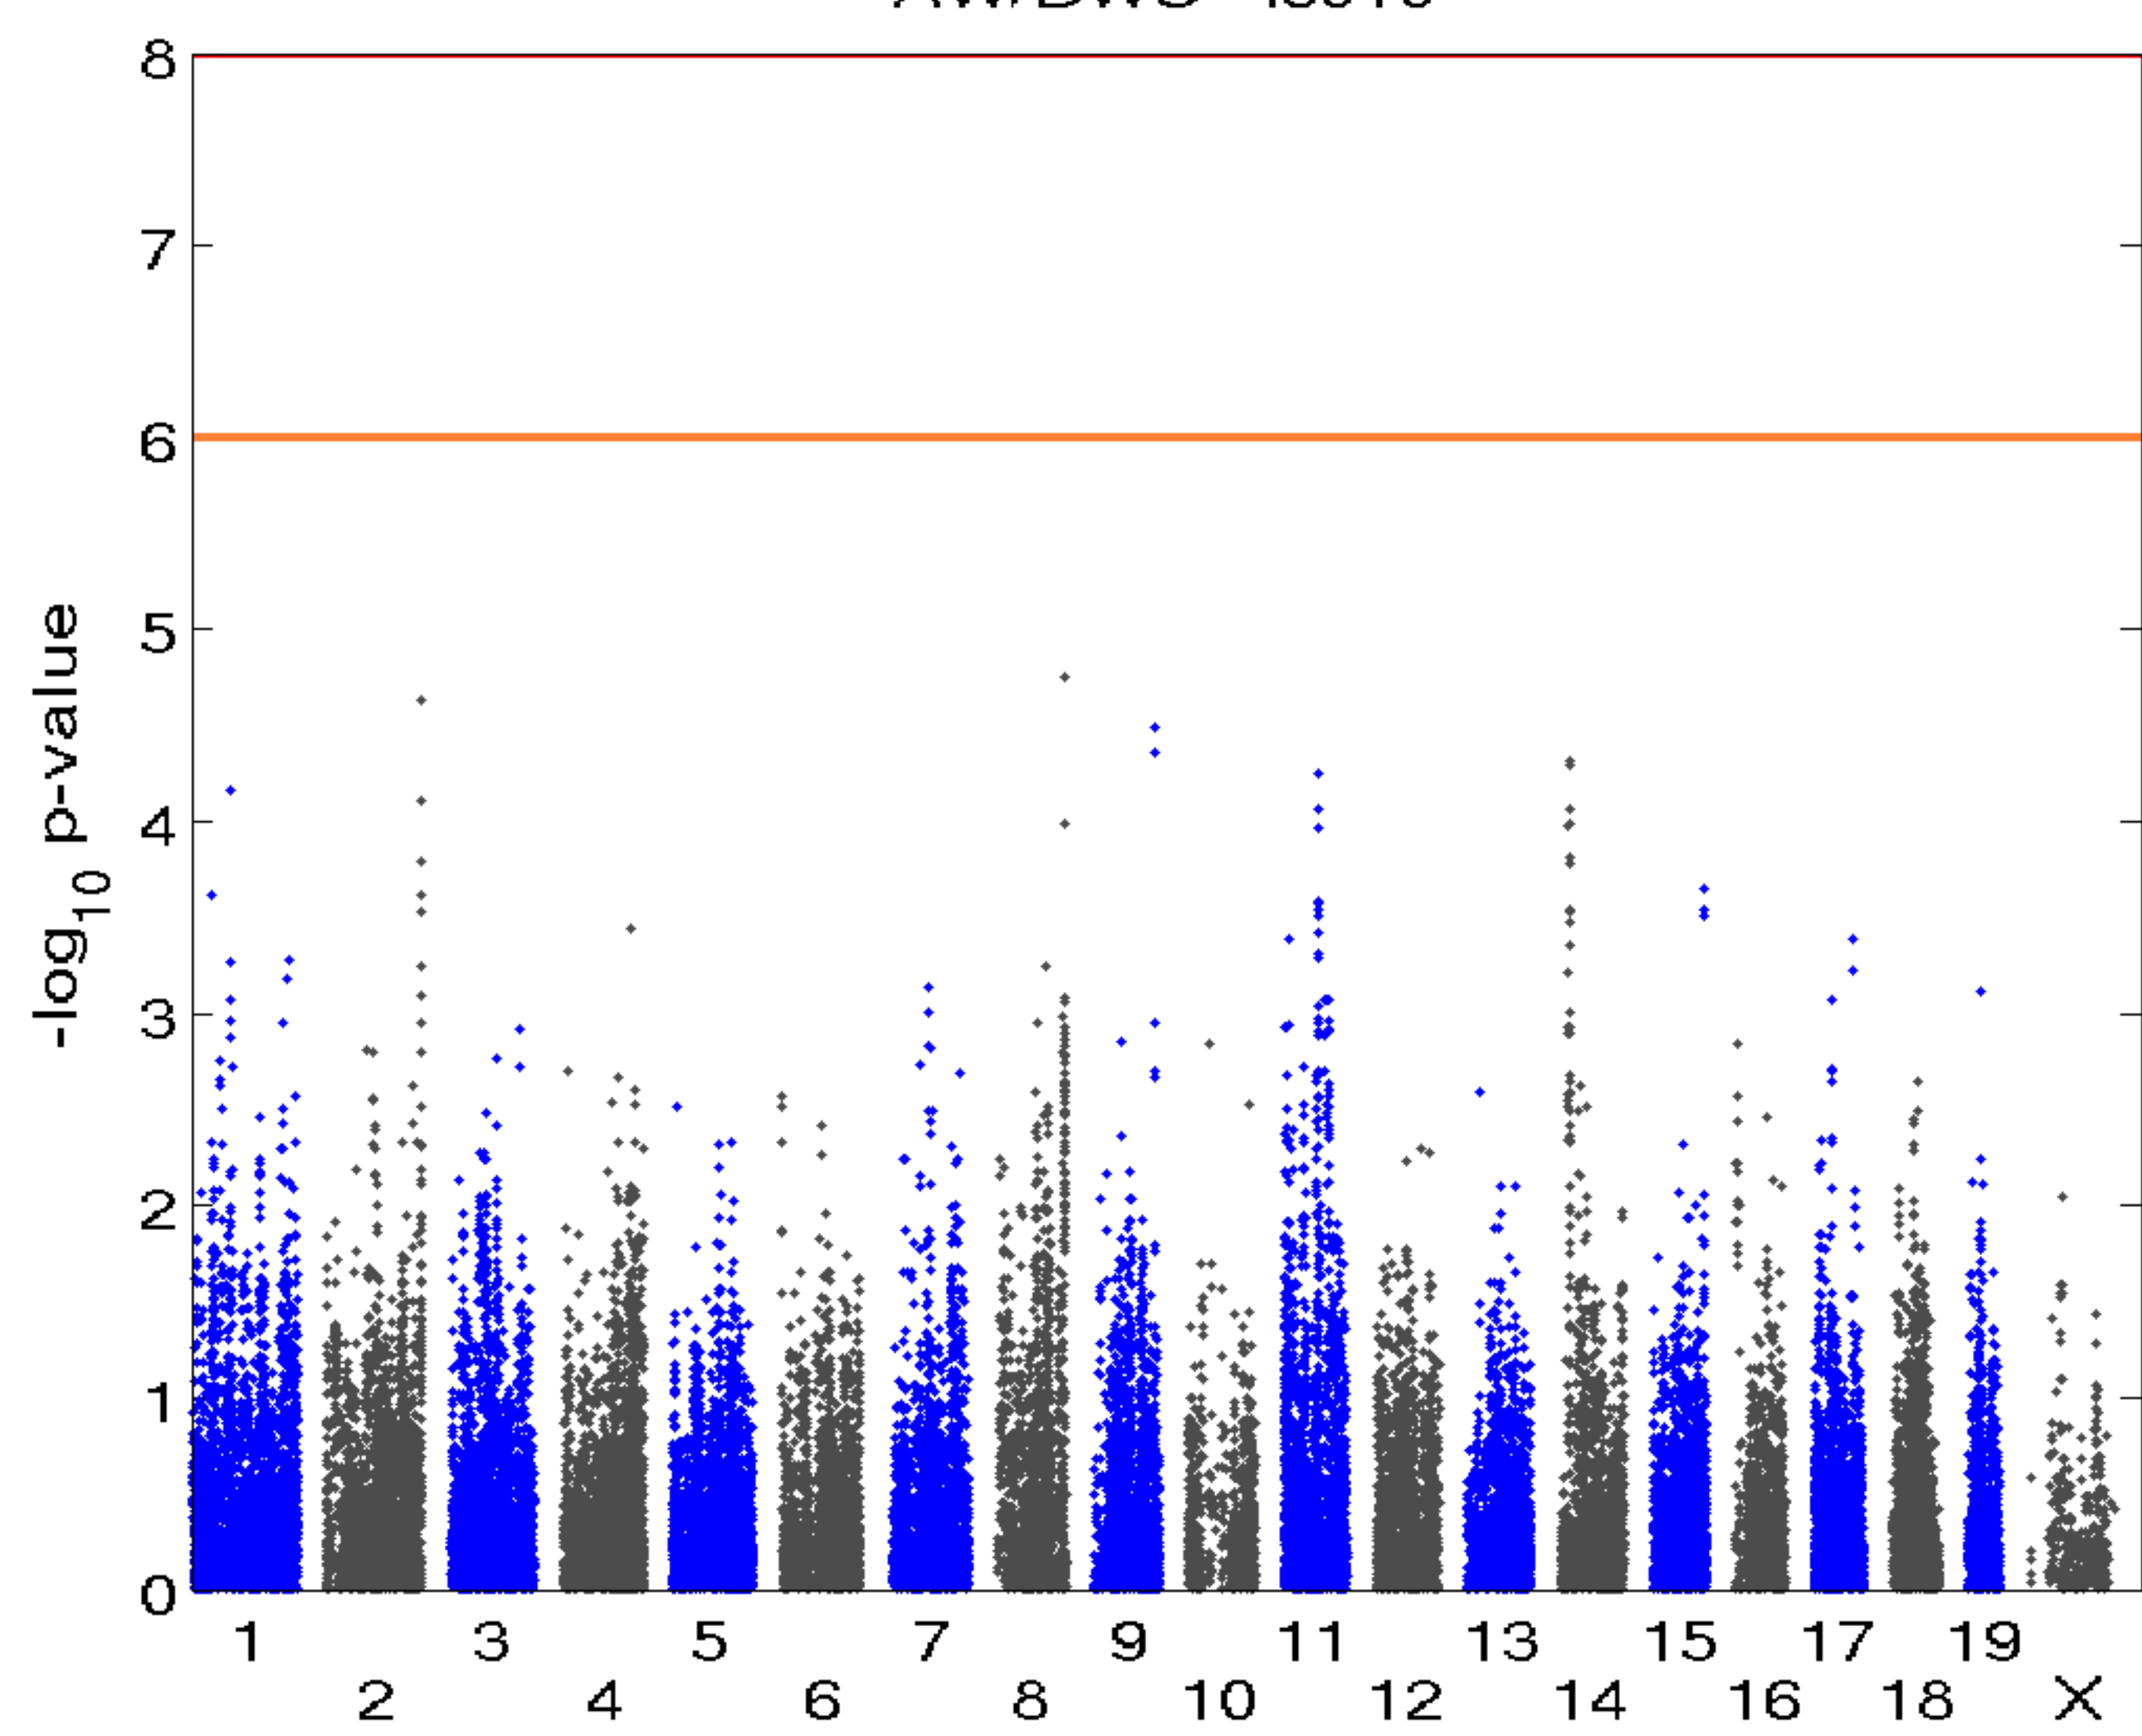

AW/BWS - iso10

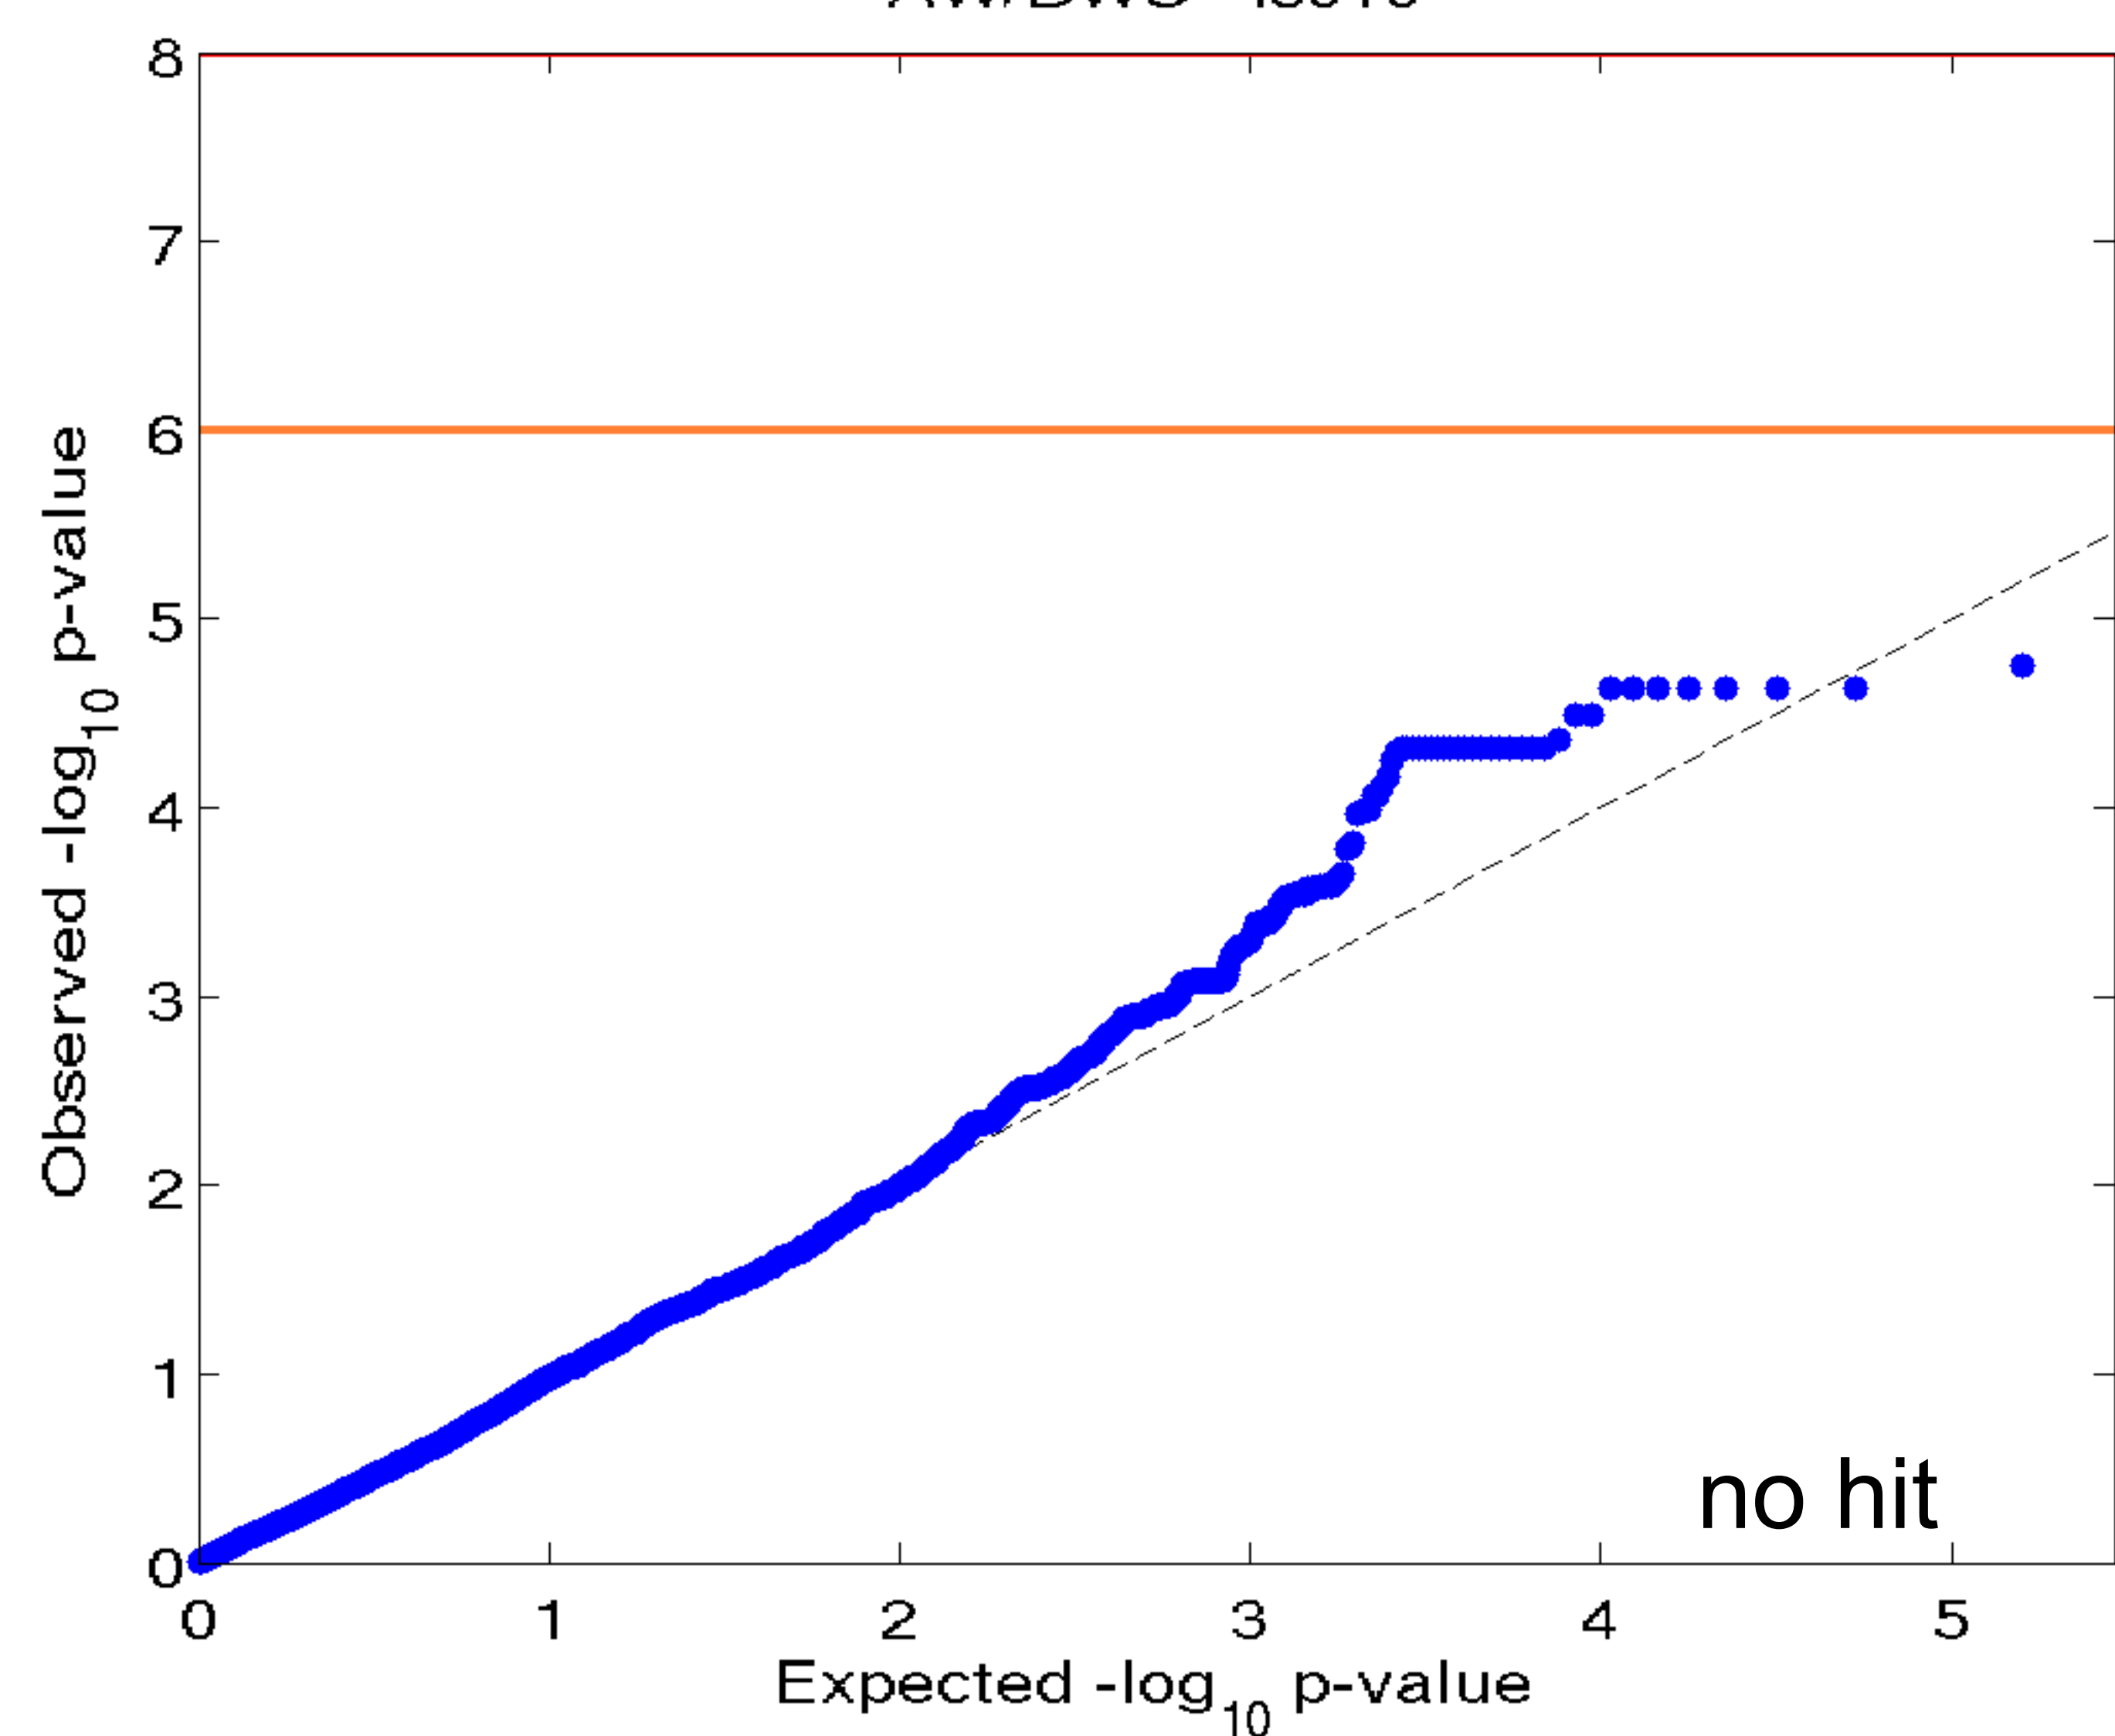

AWI - iso10

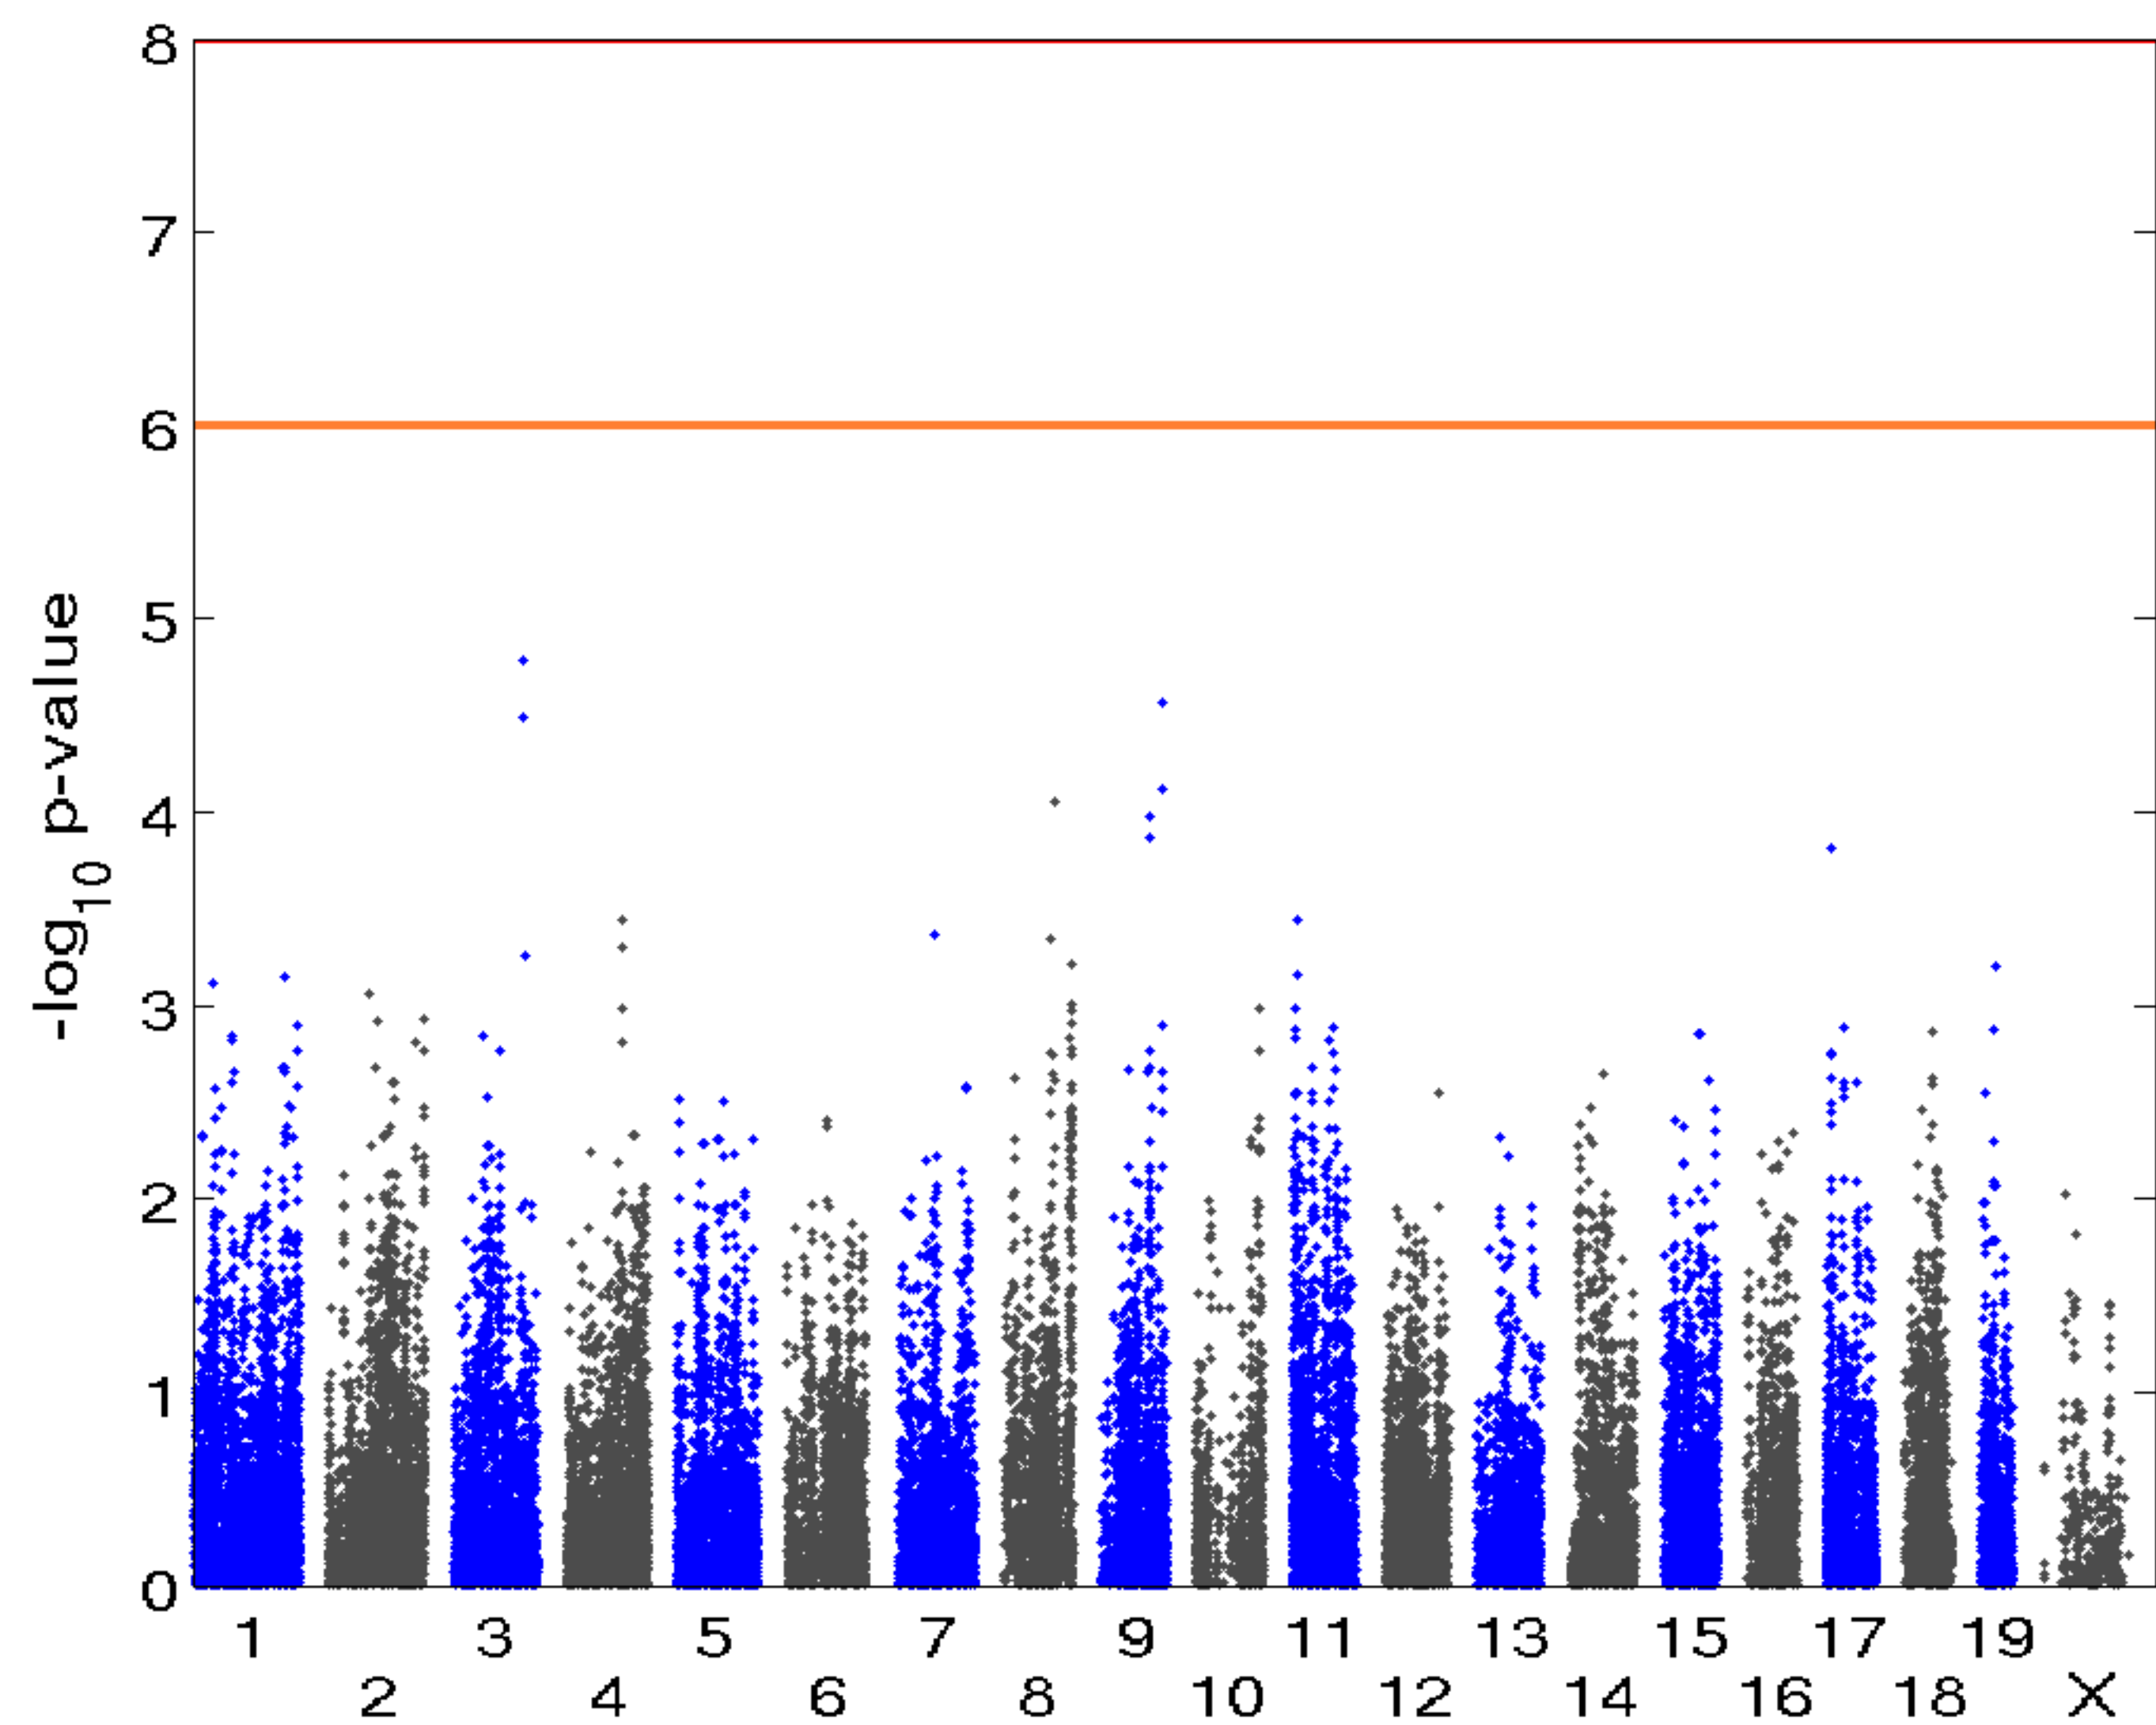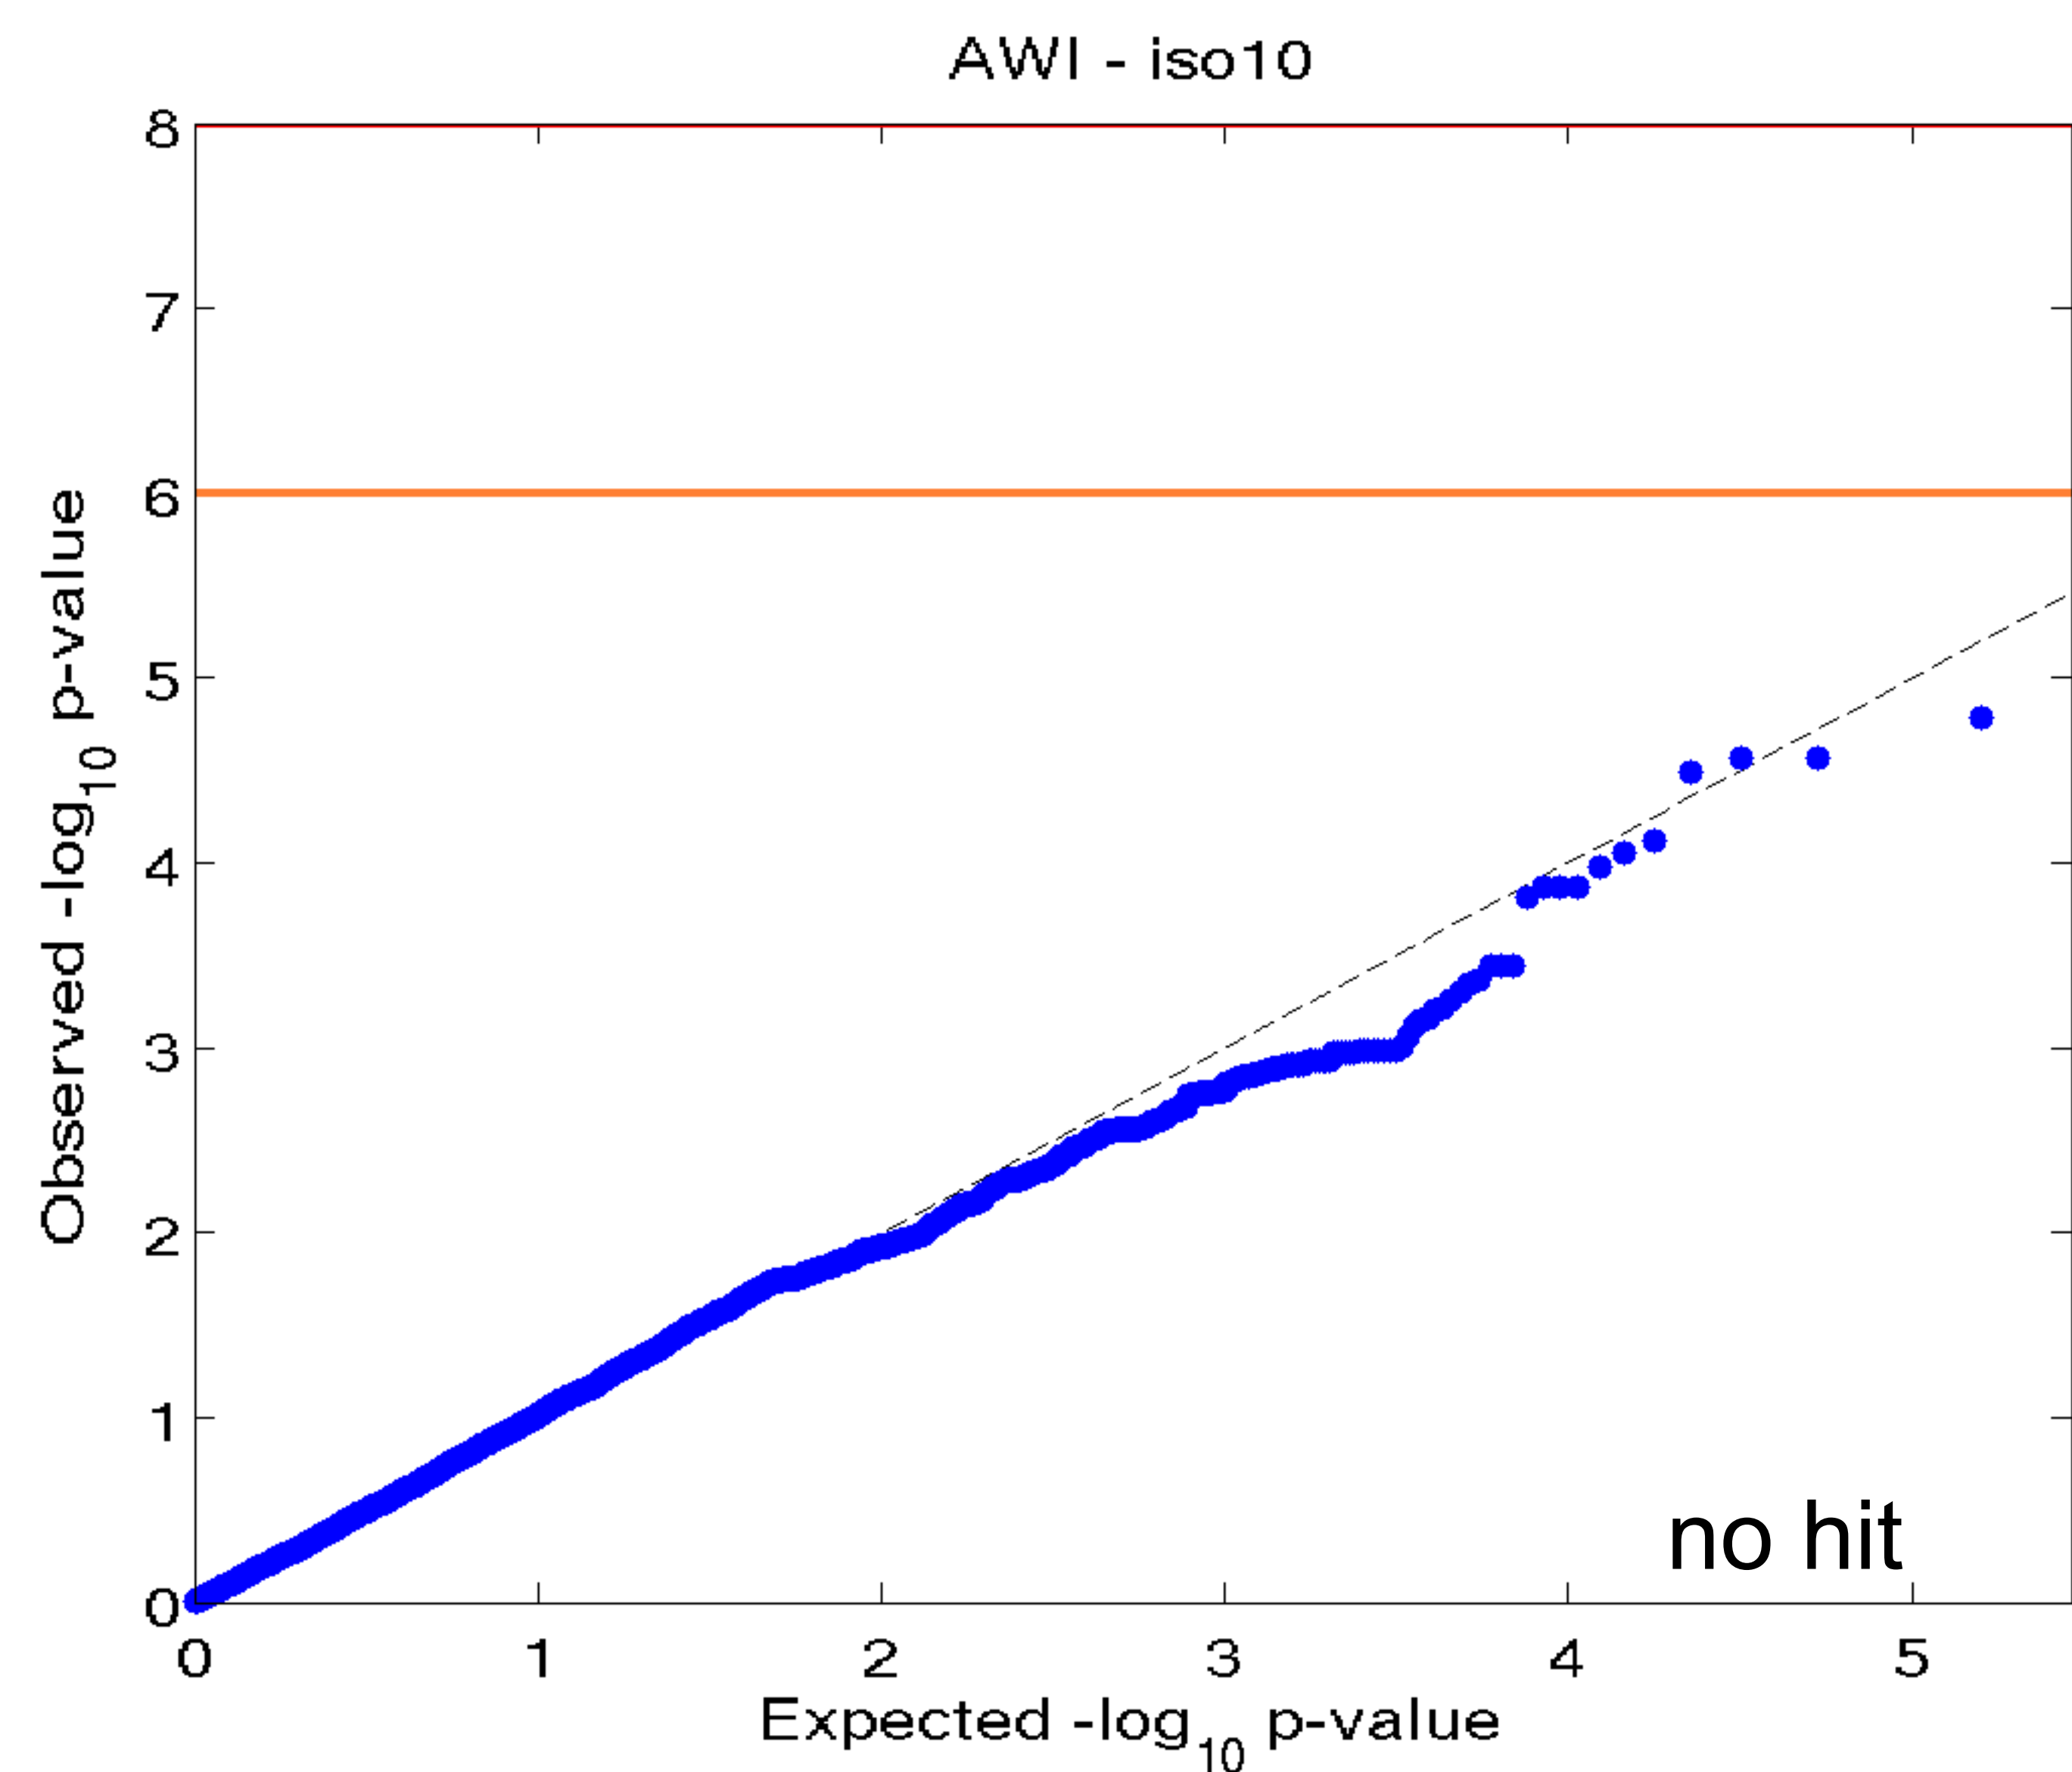

AW - iso10

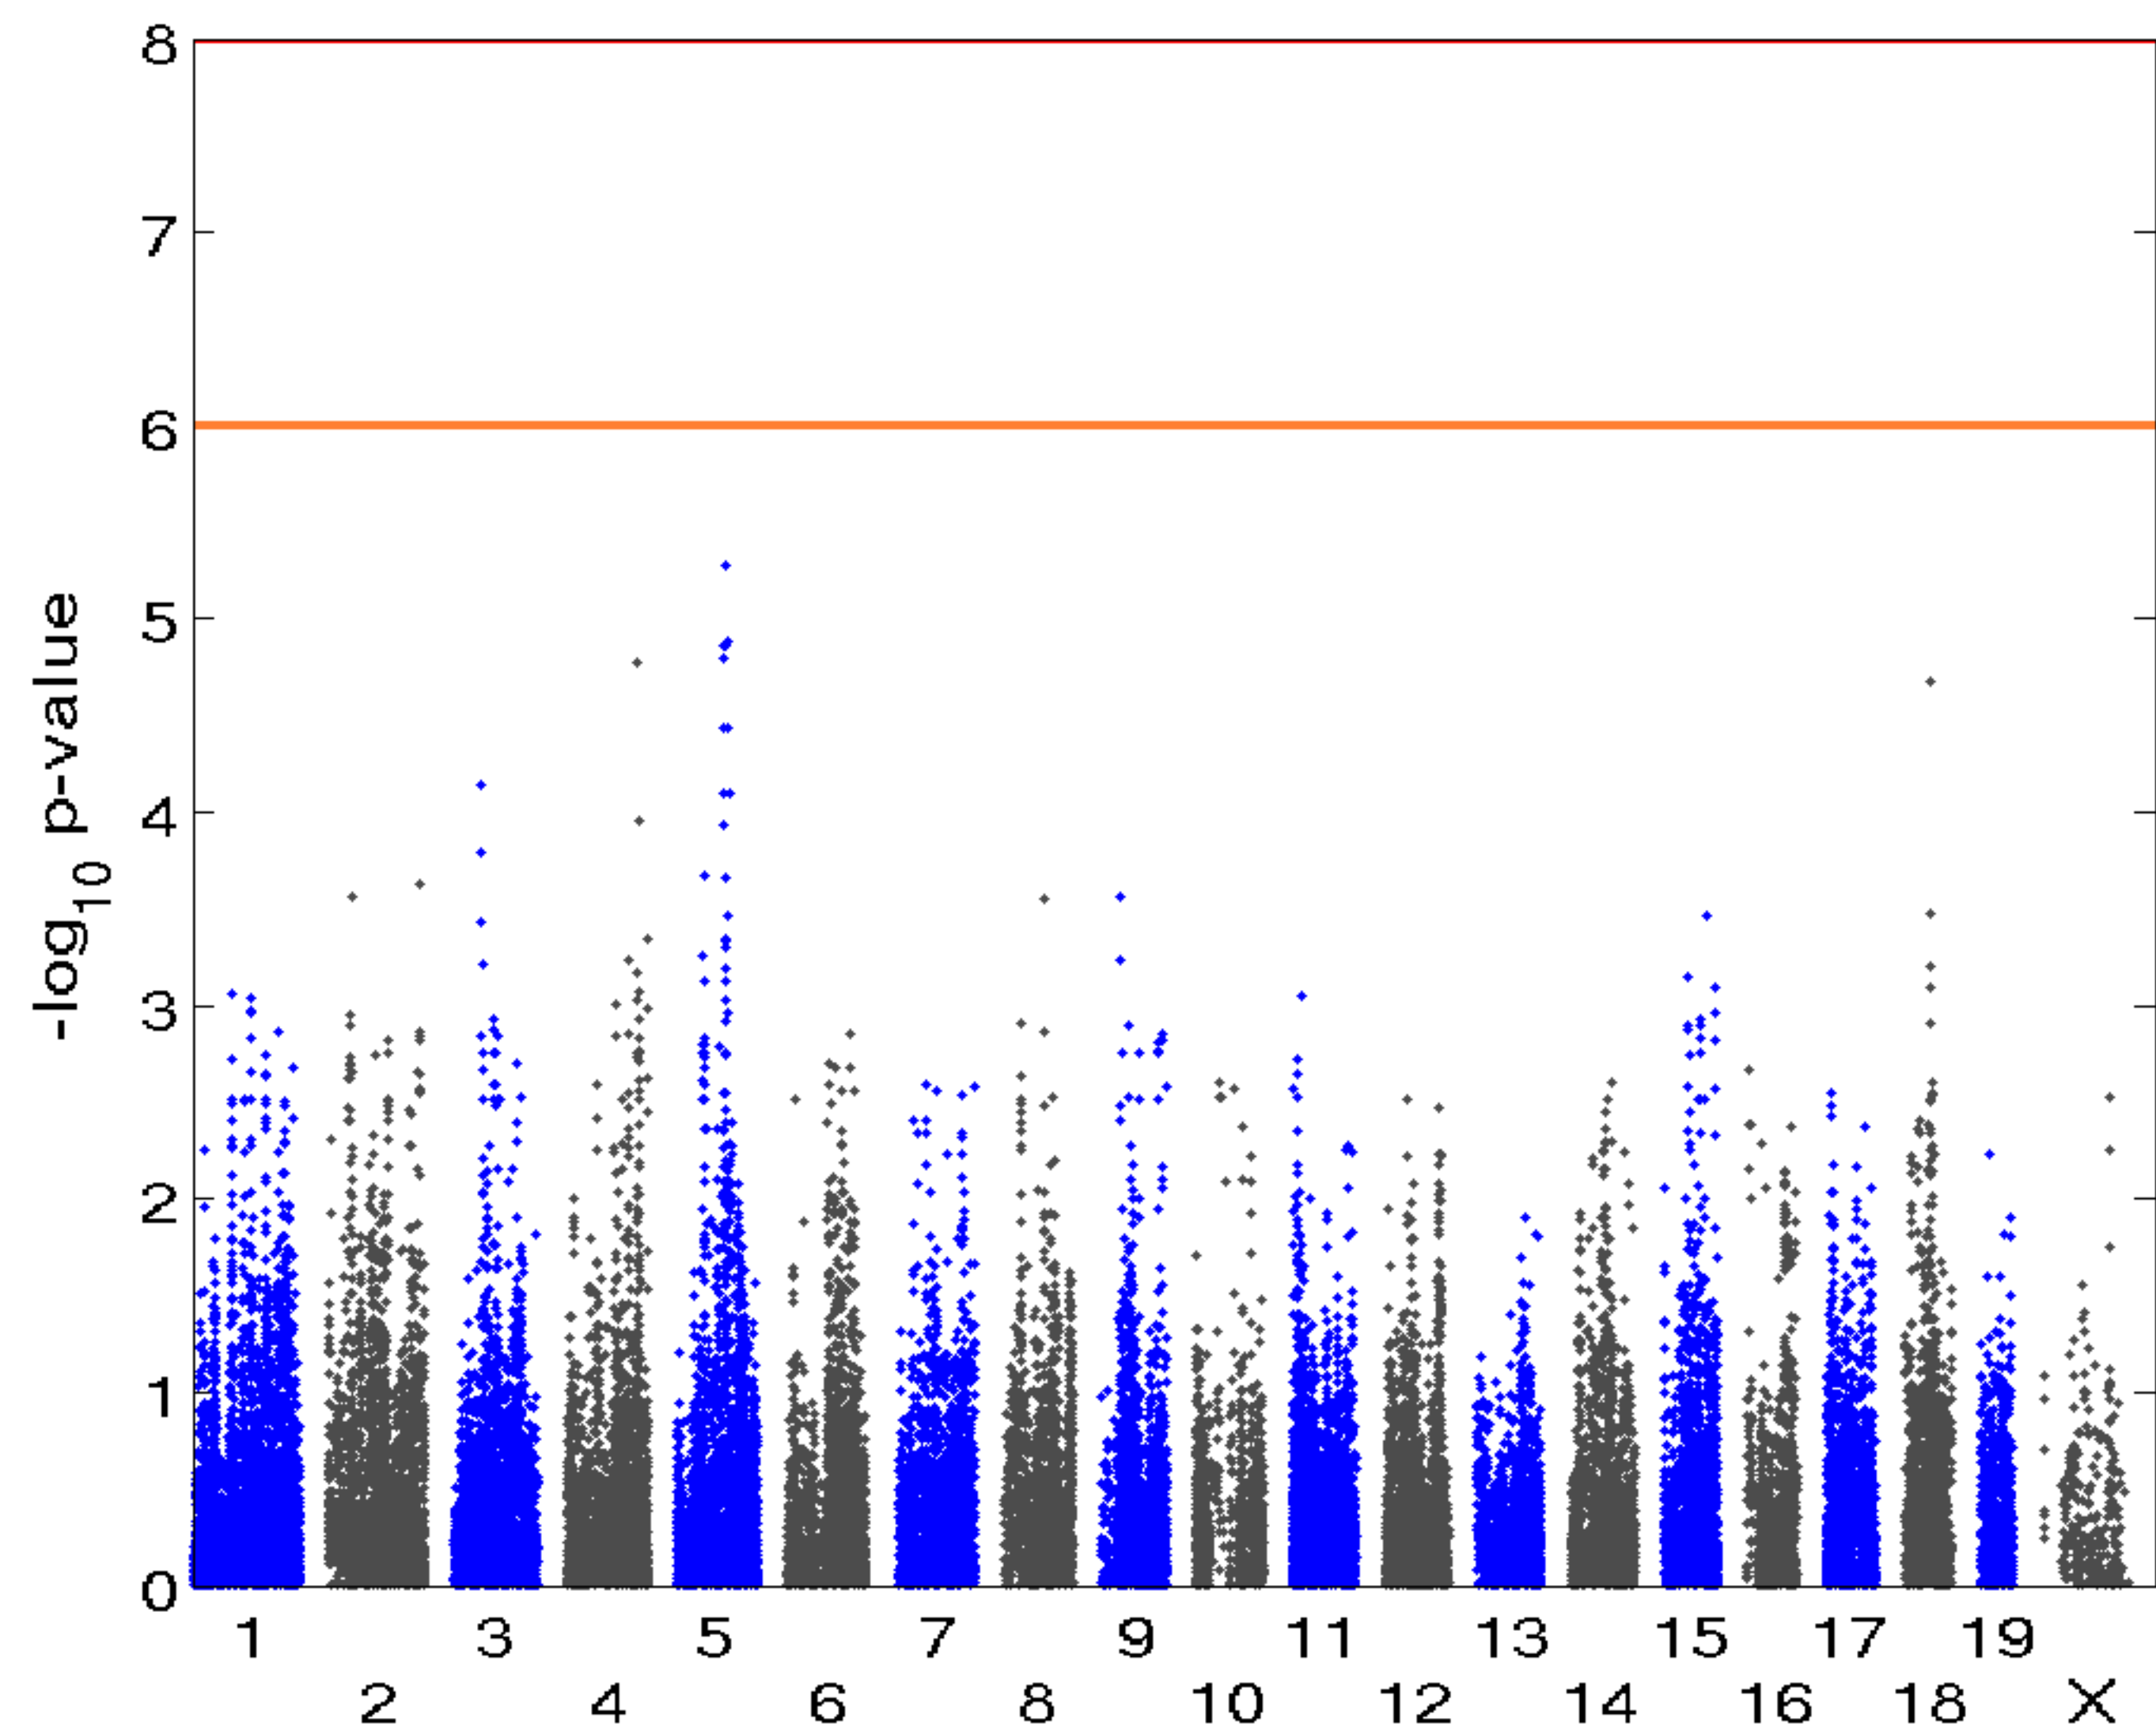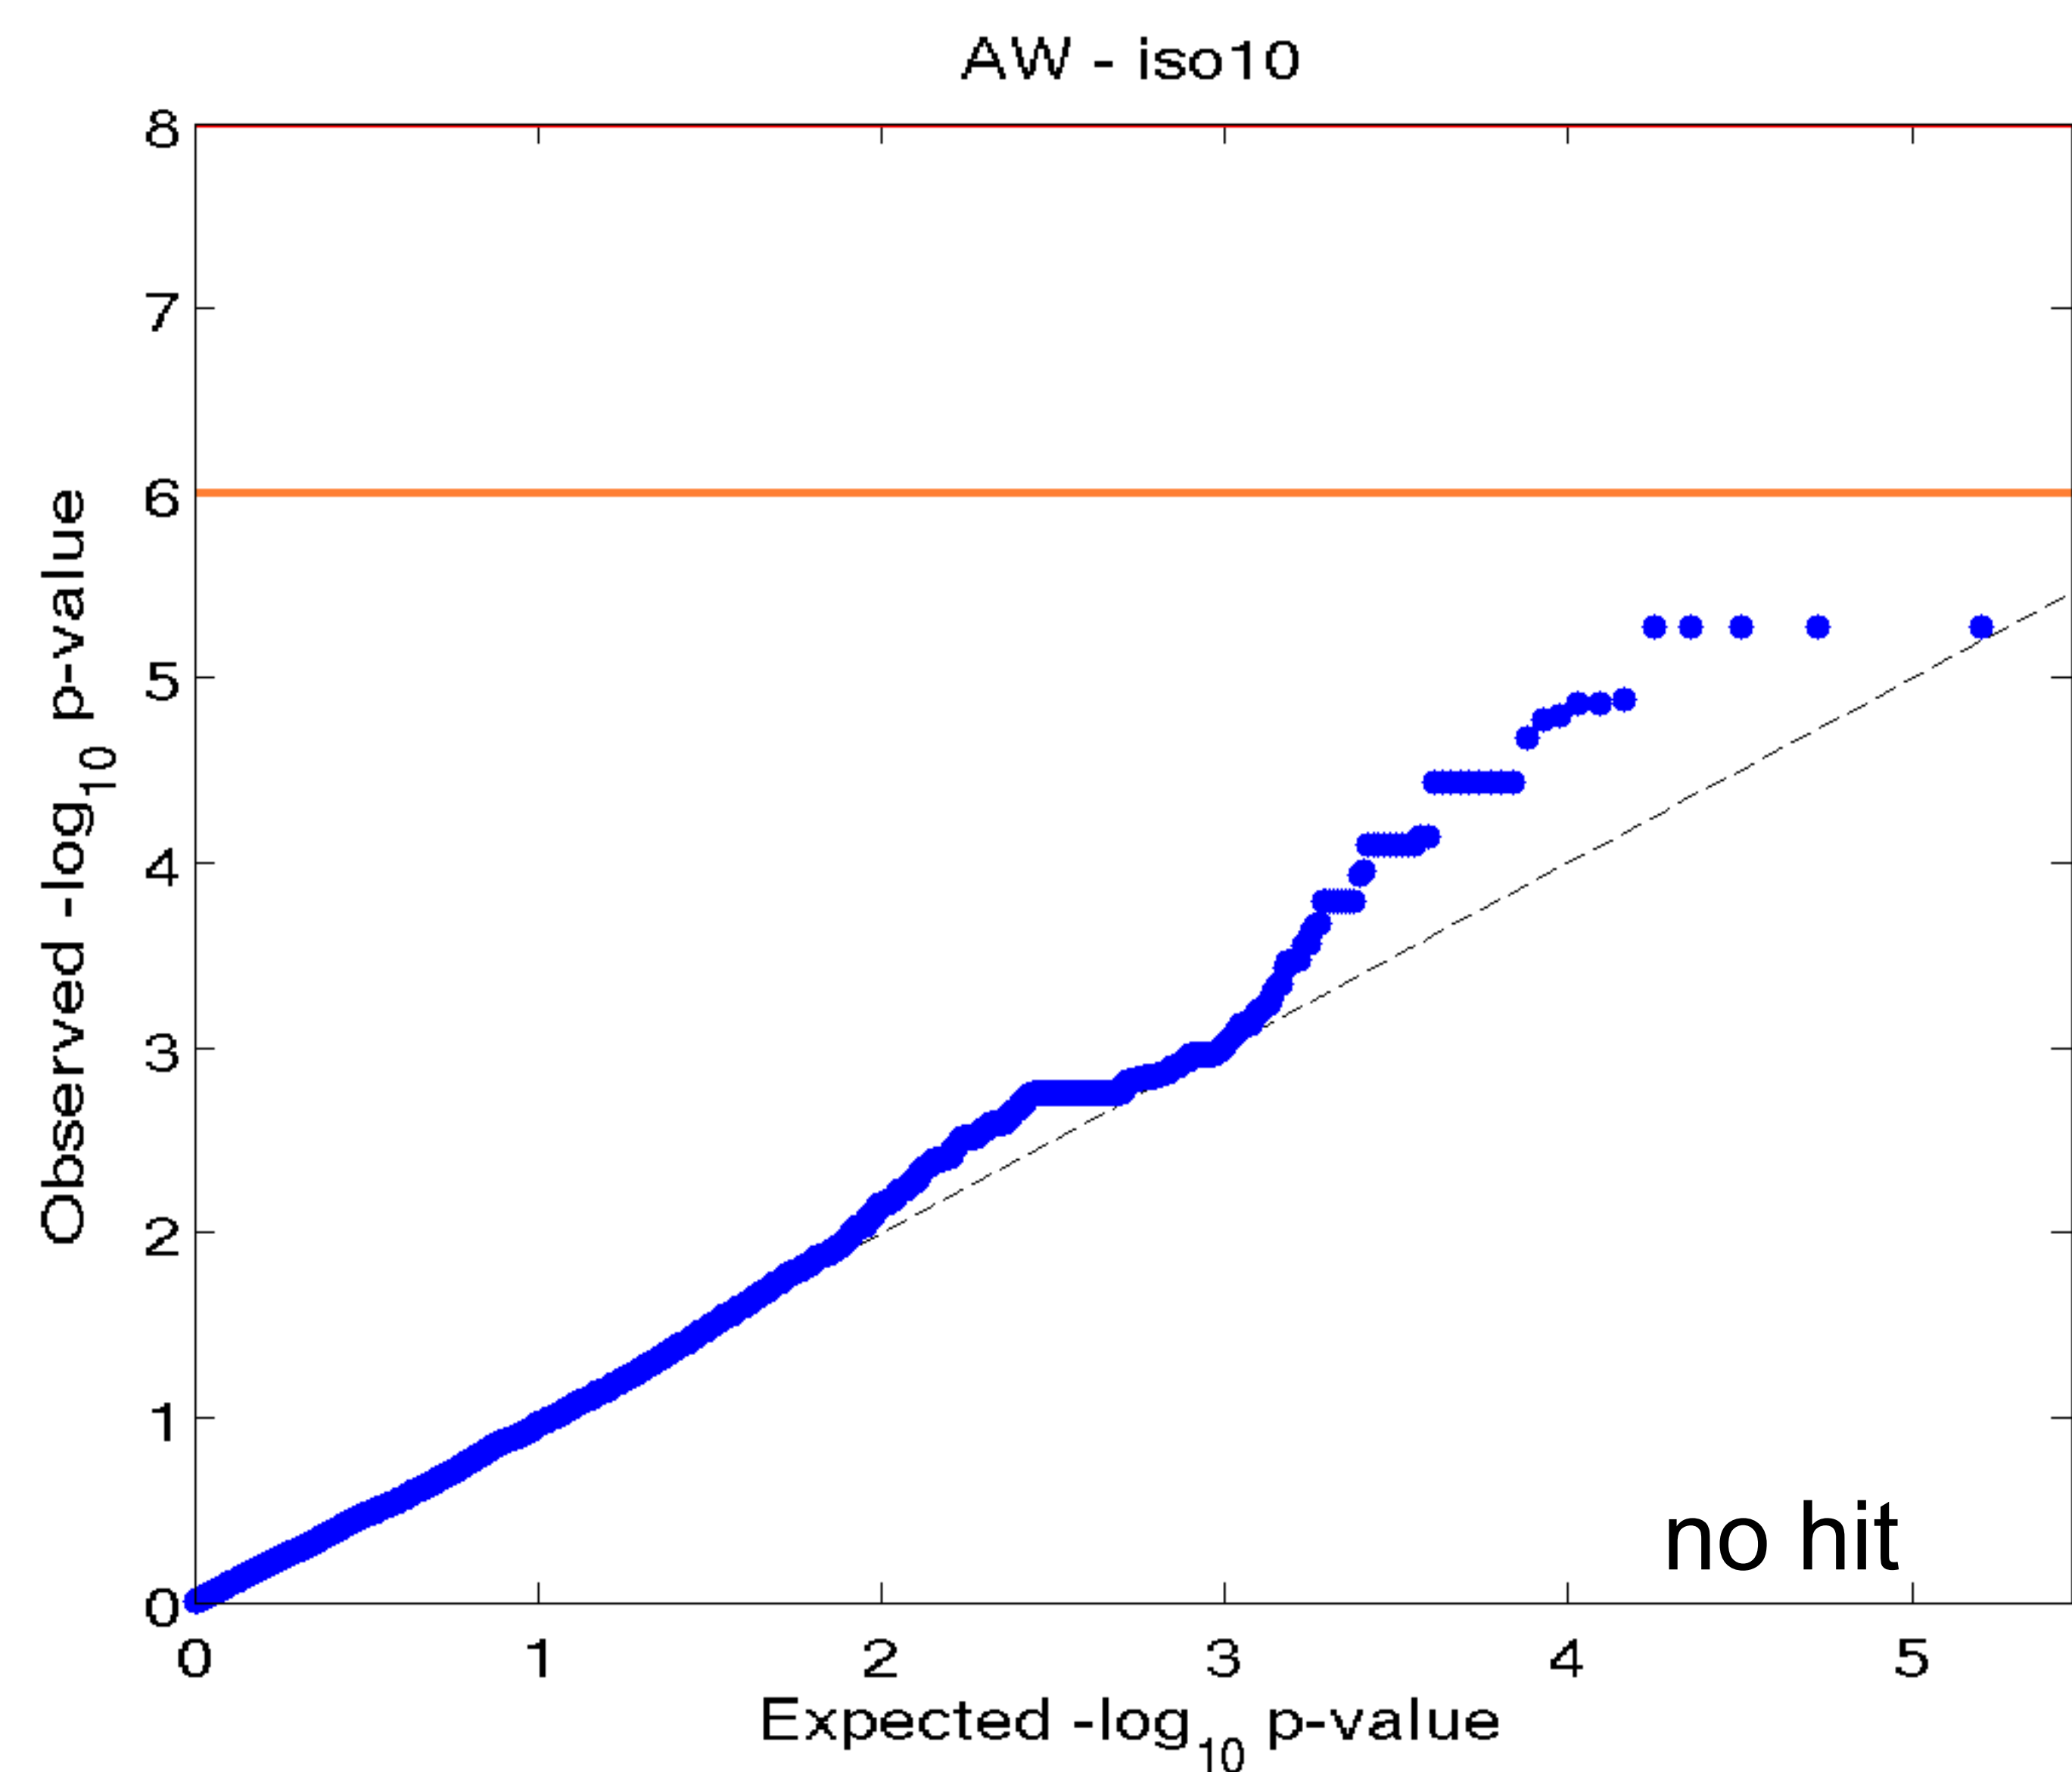

BWE/BWS - iso10

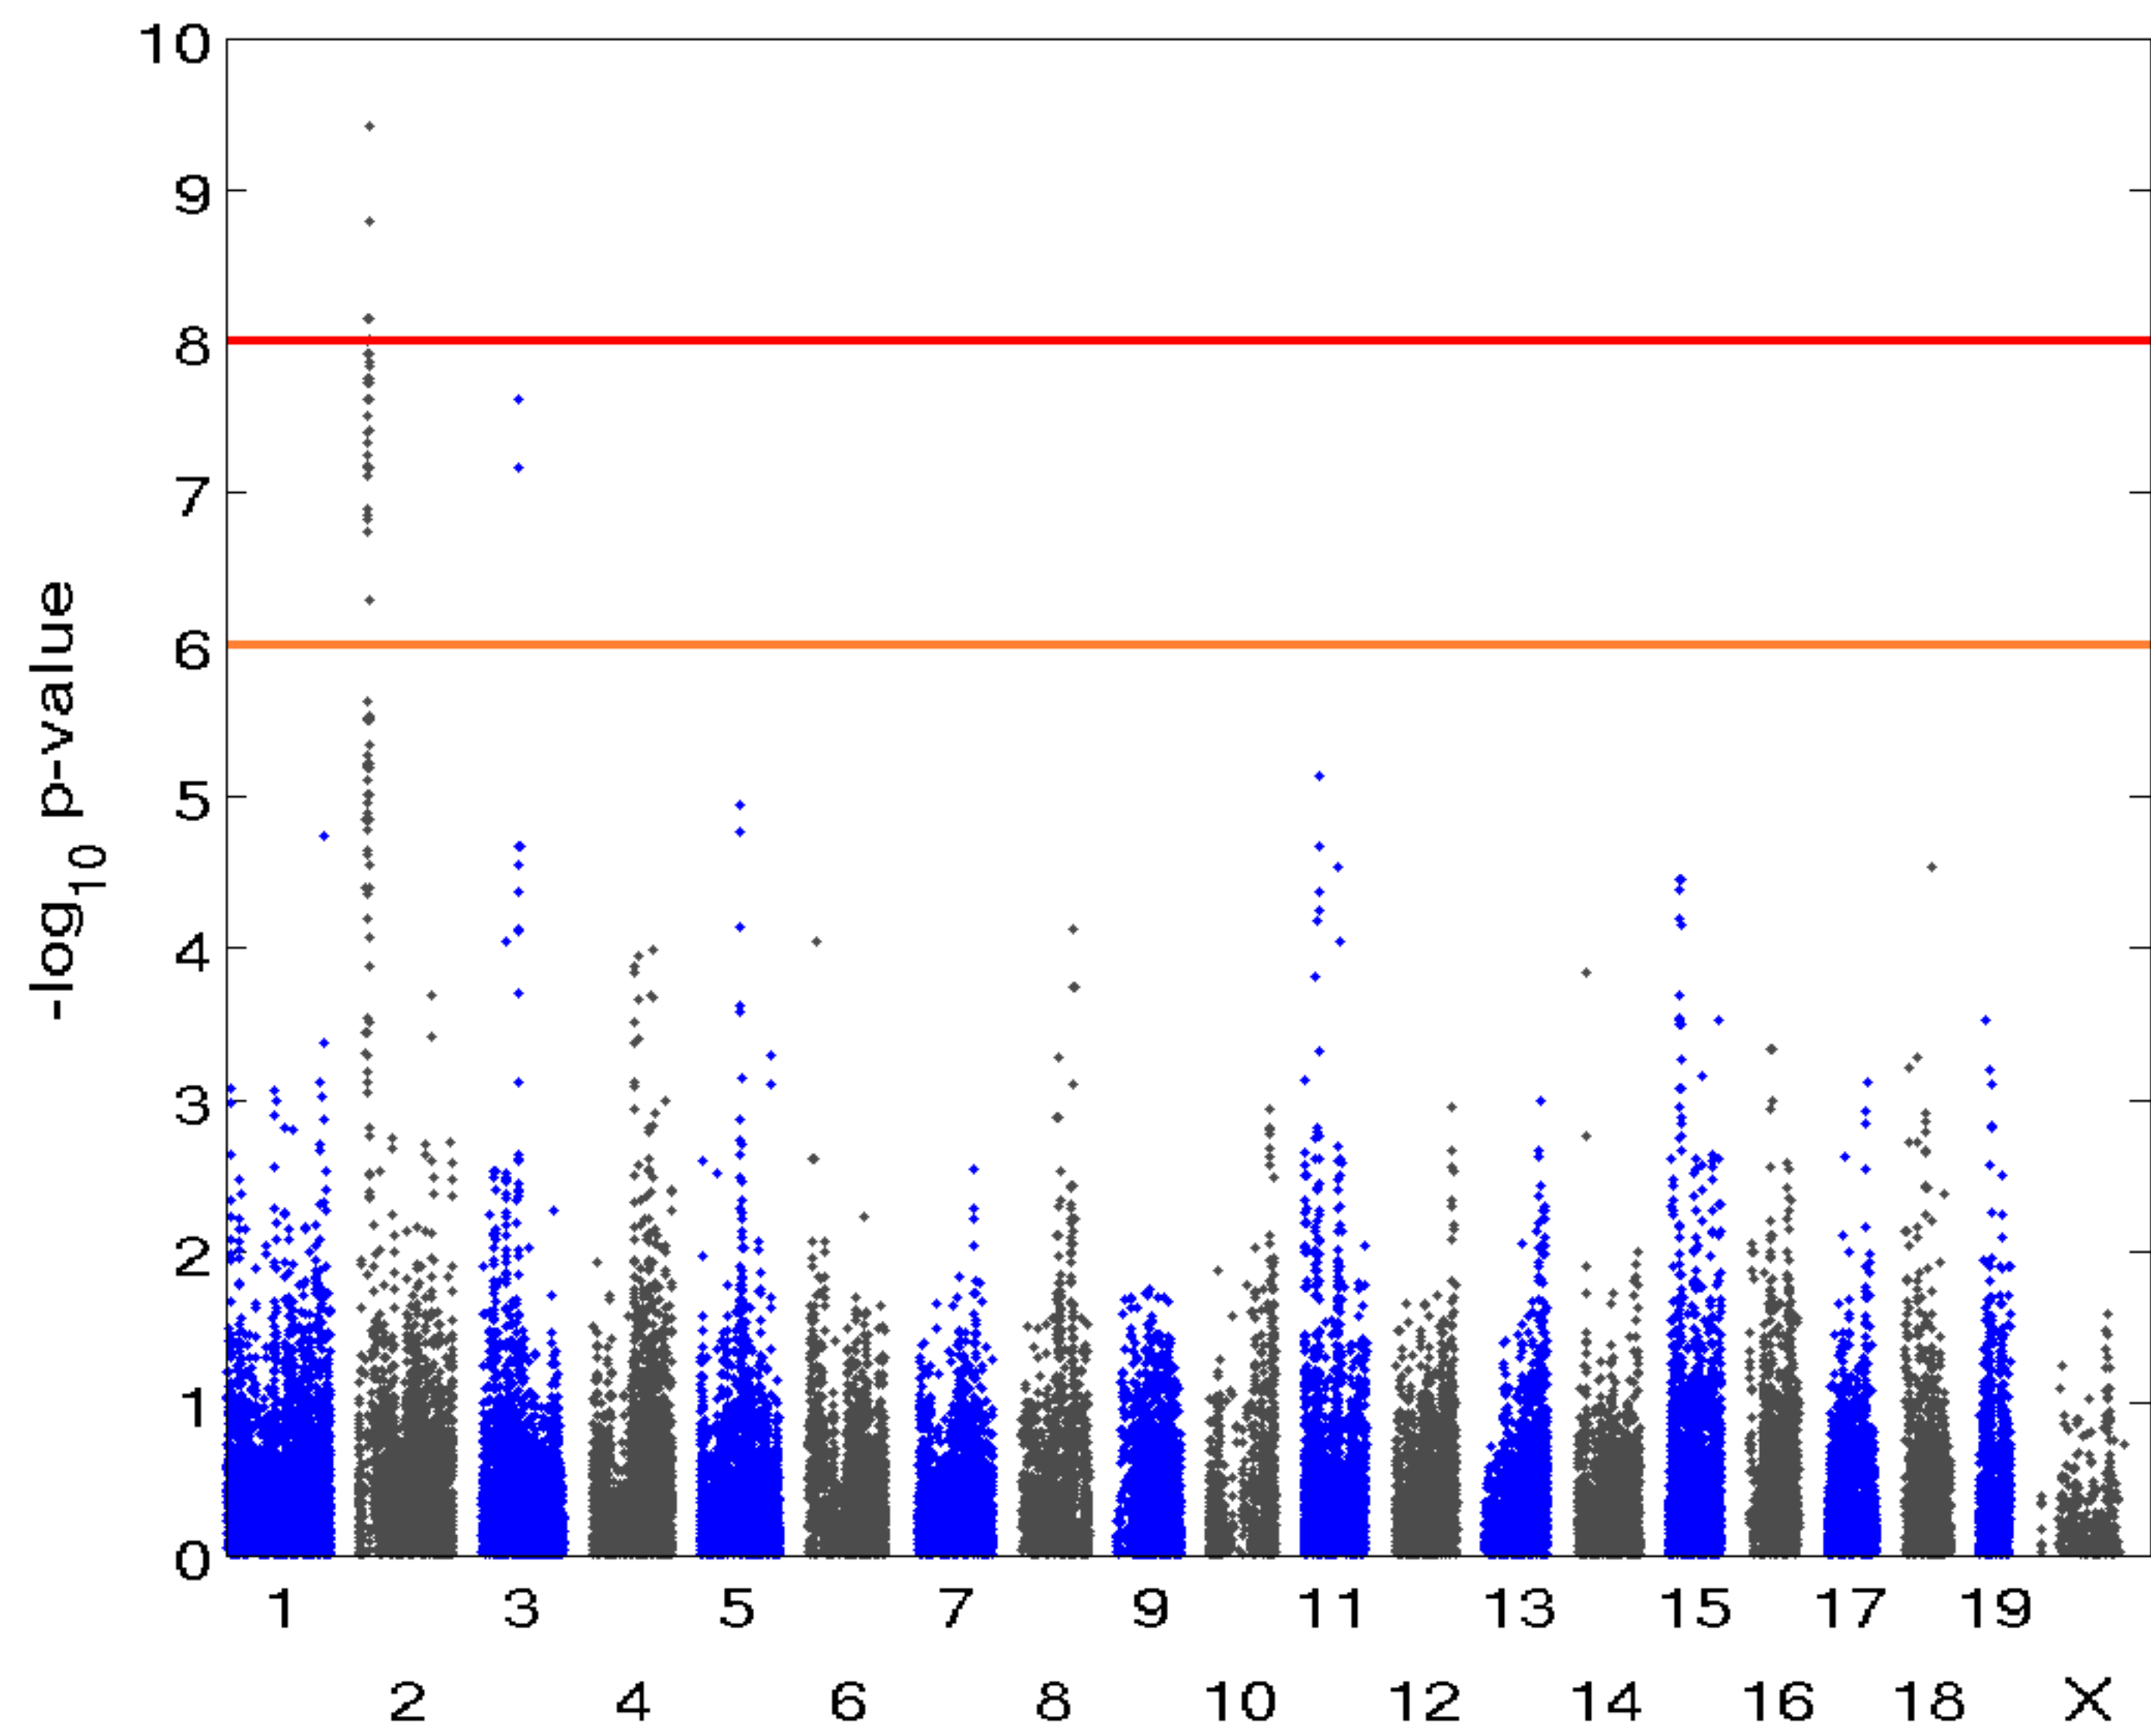

BWE/BWS - iso10

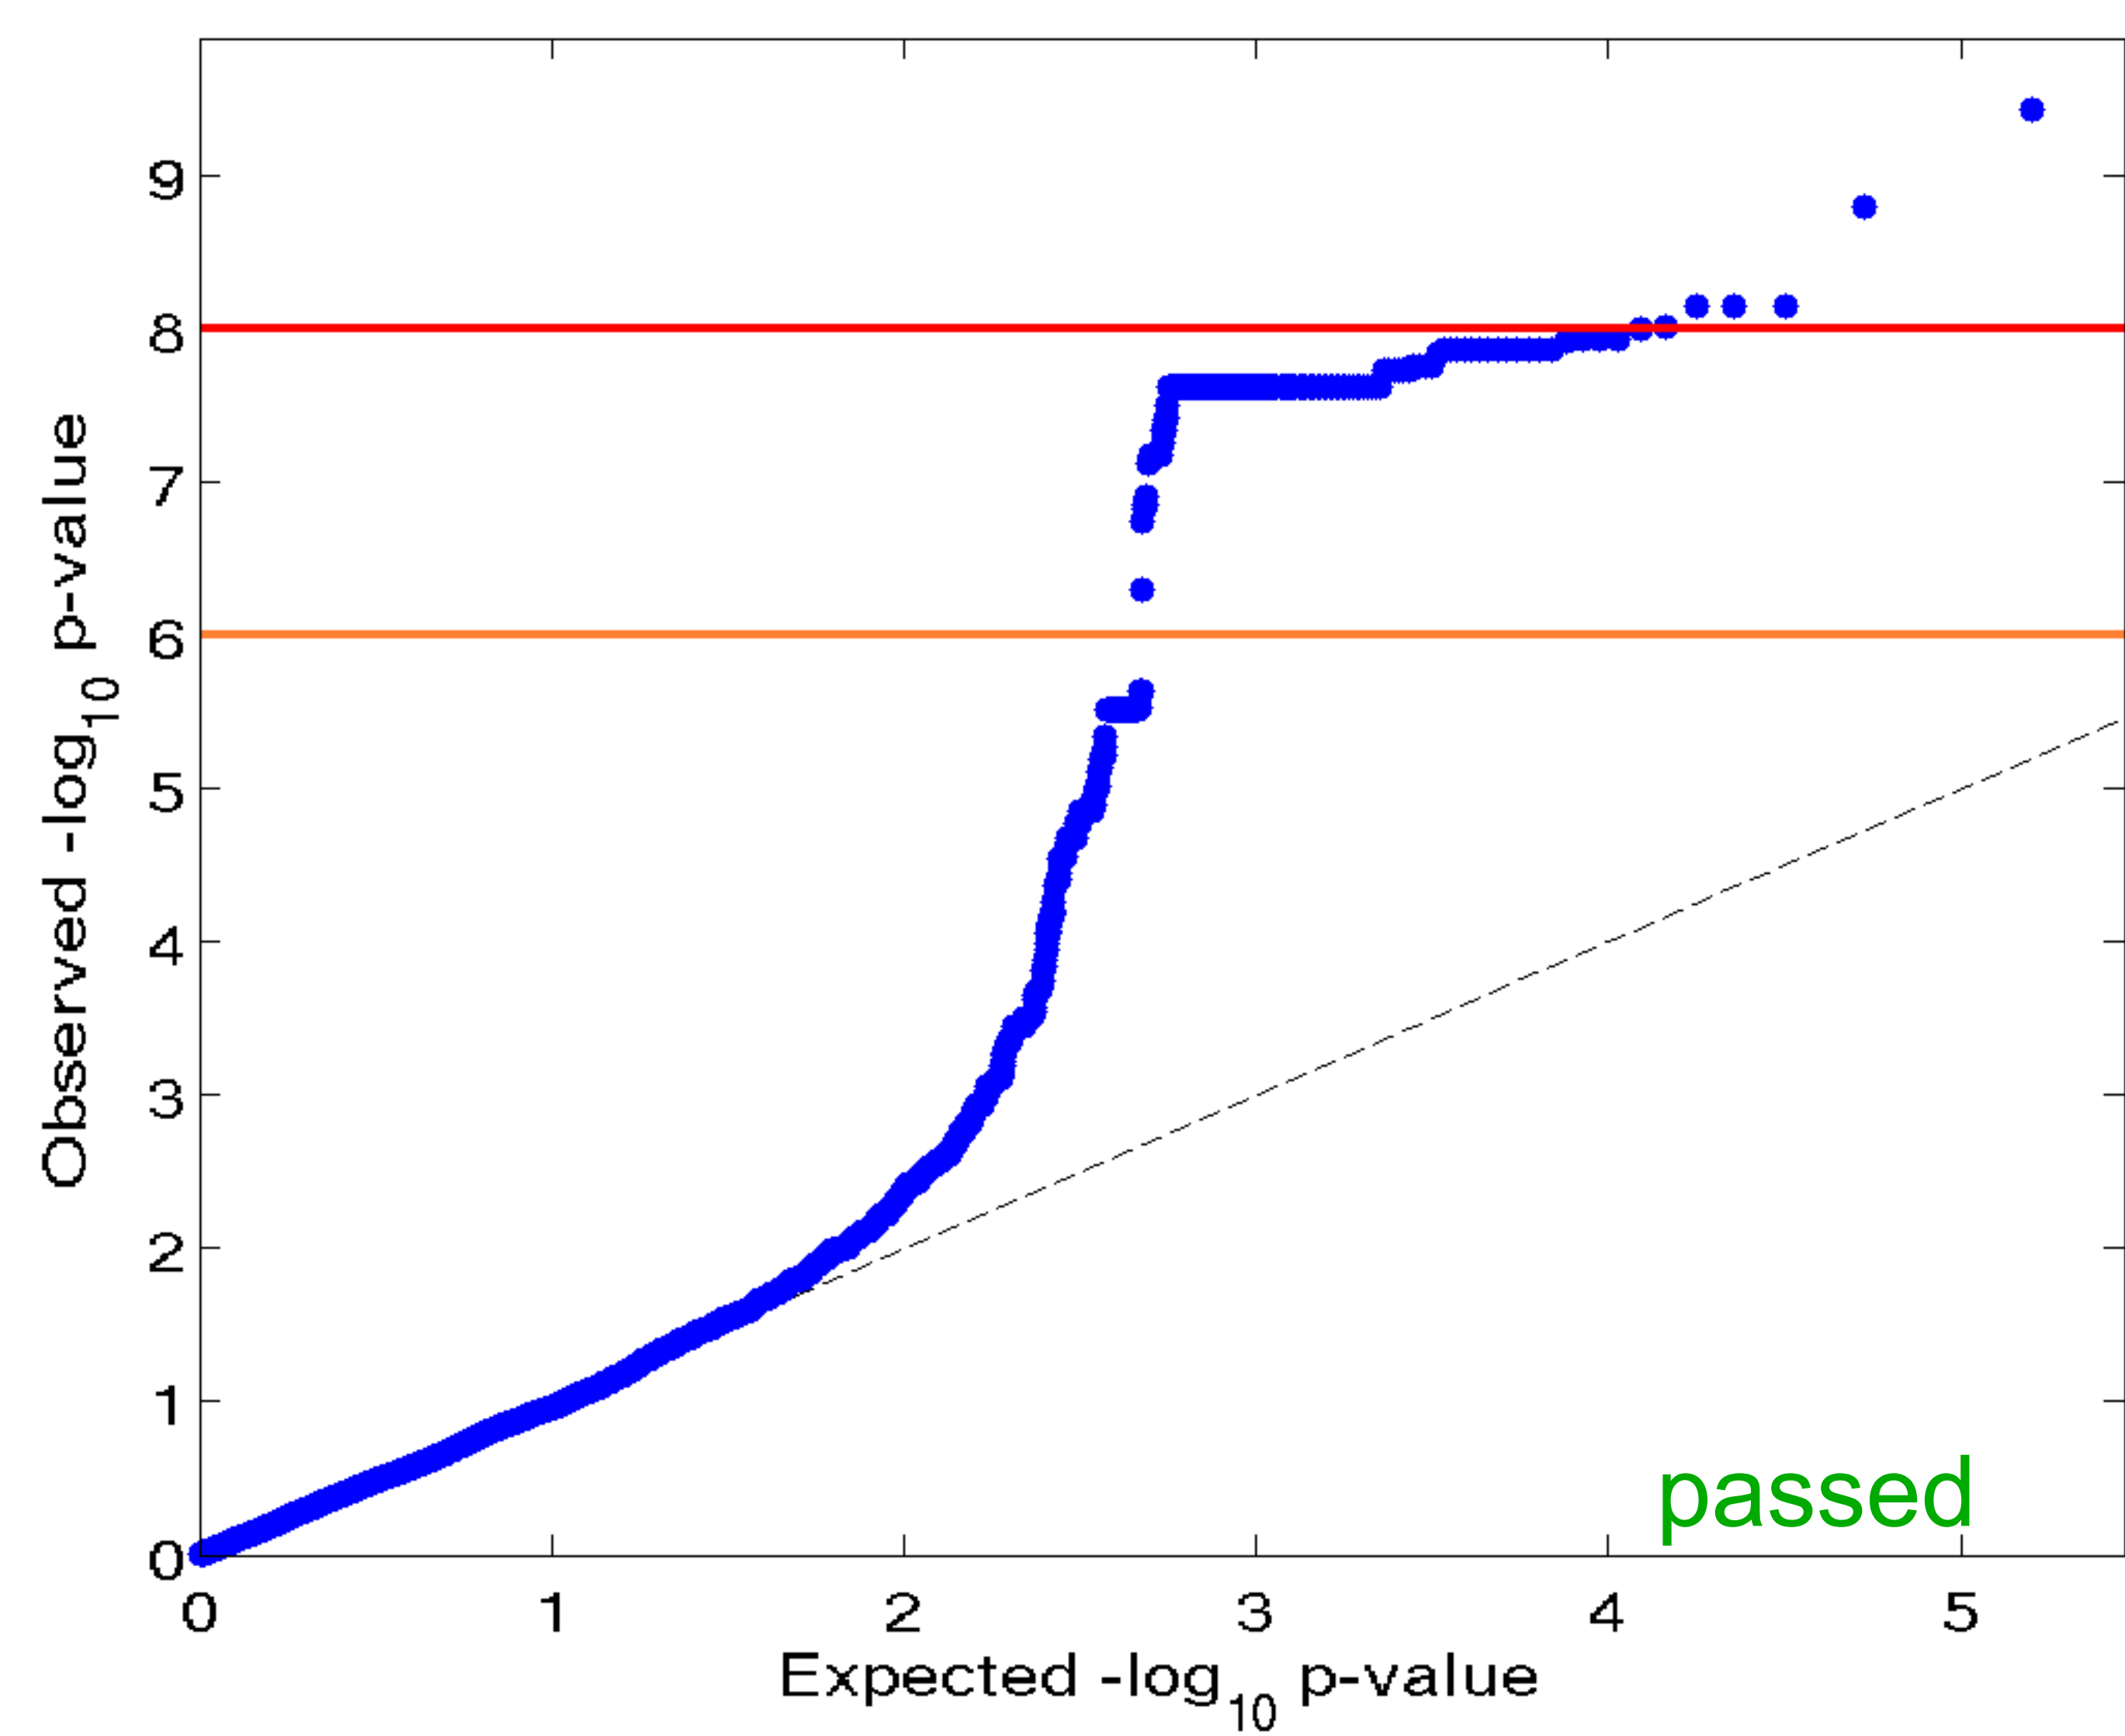



BWE - iso10

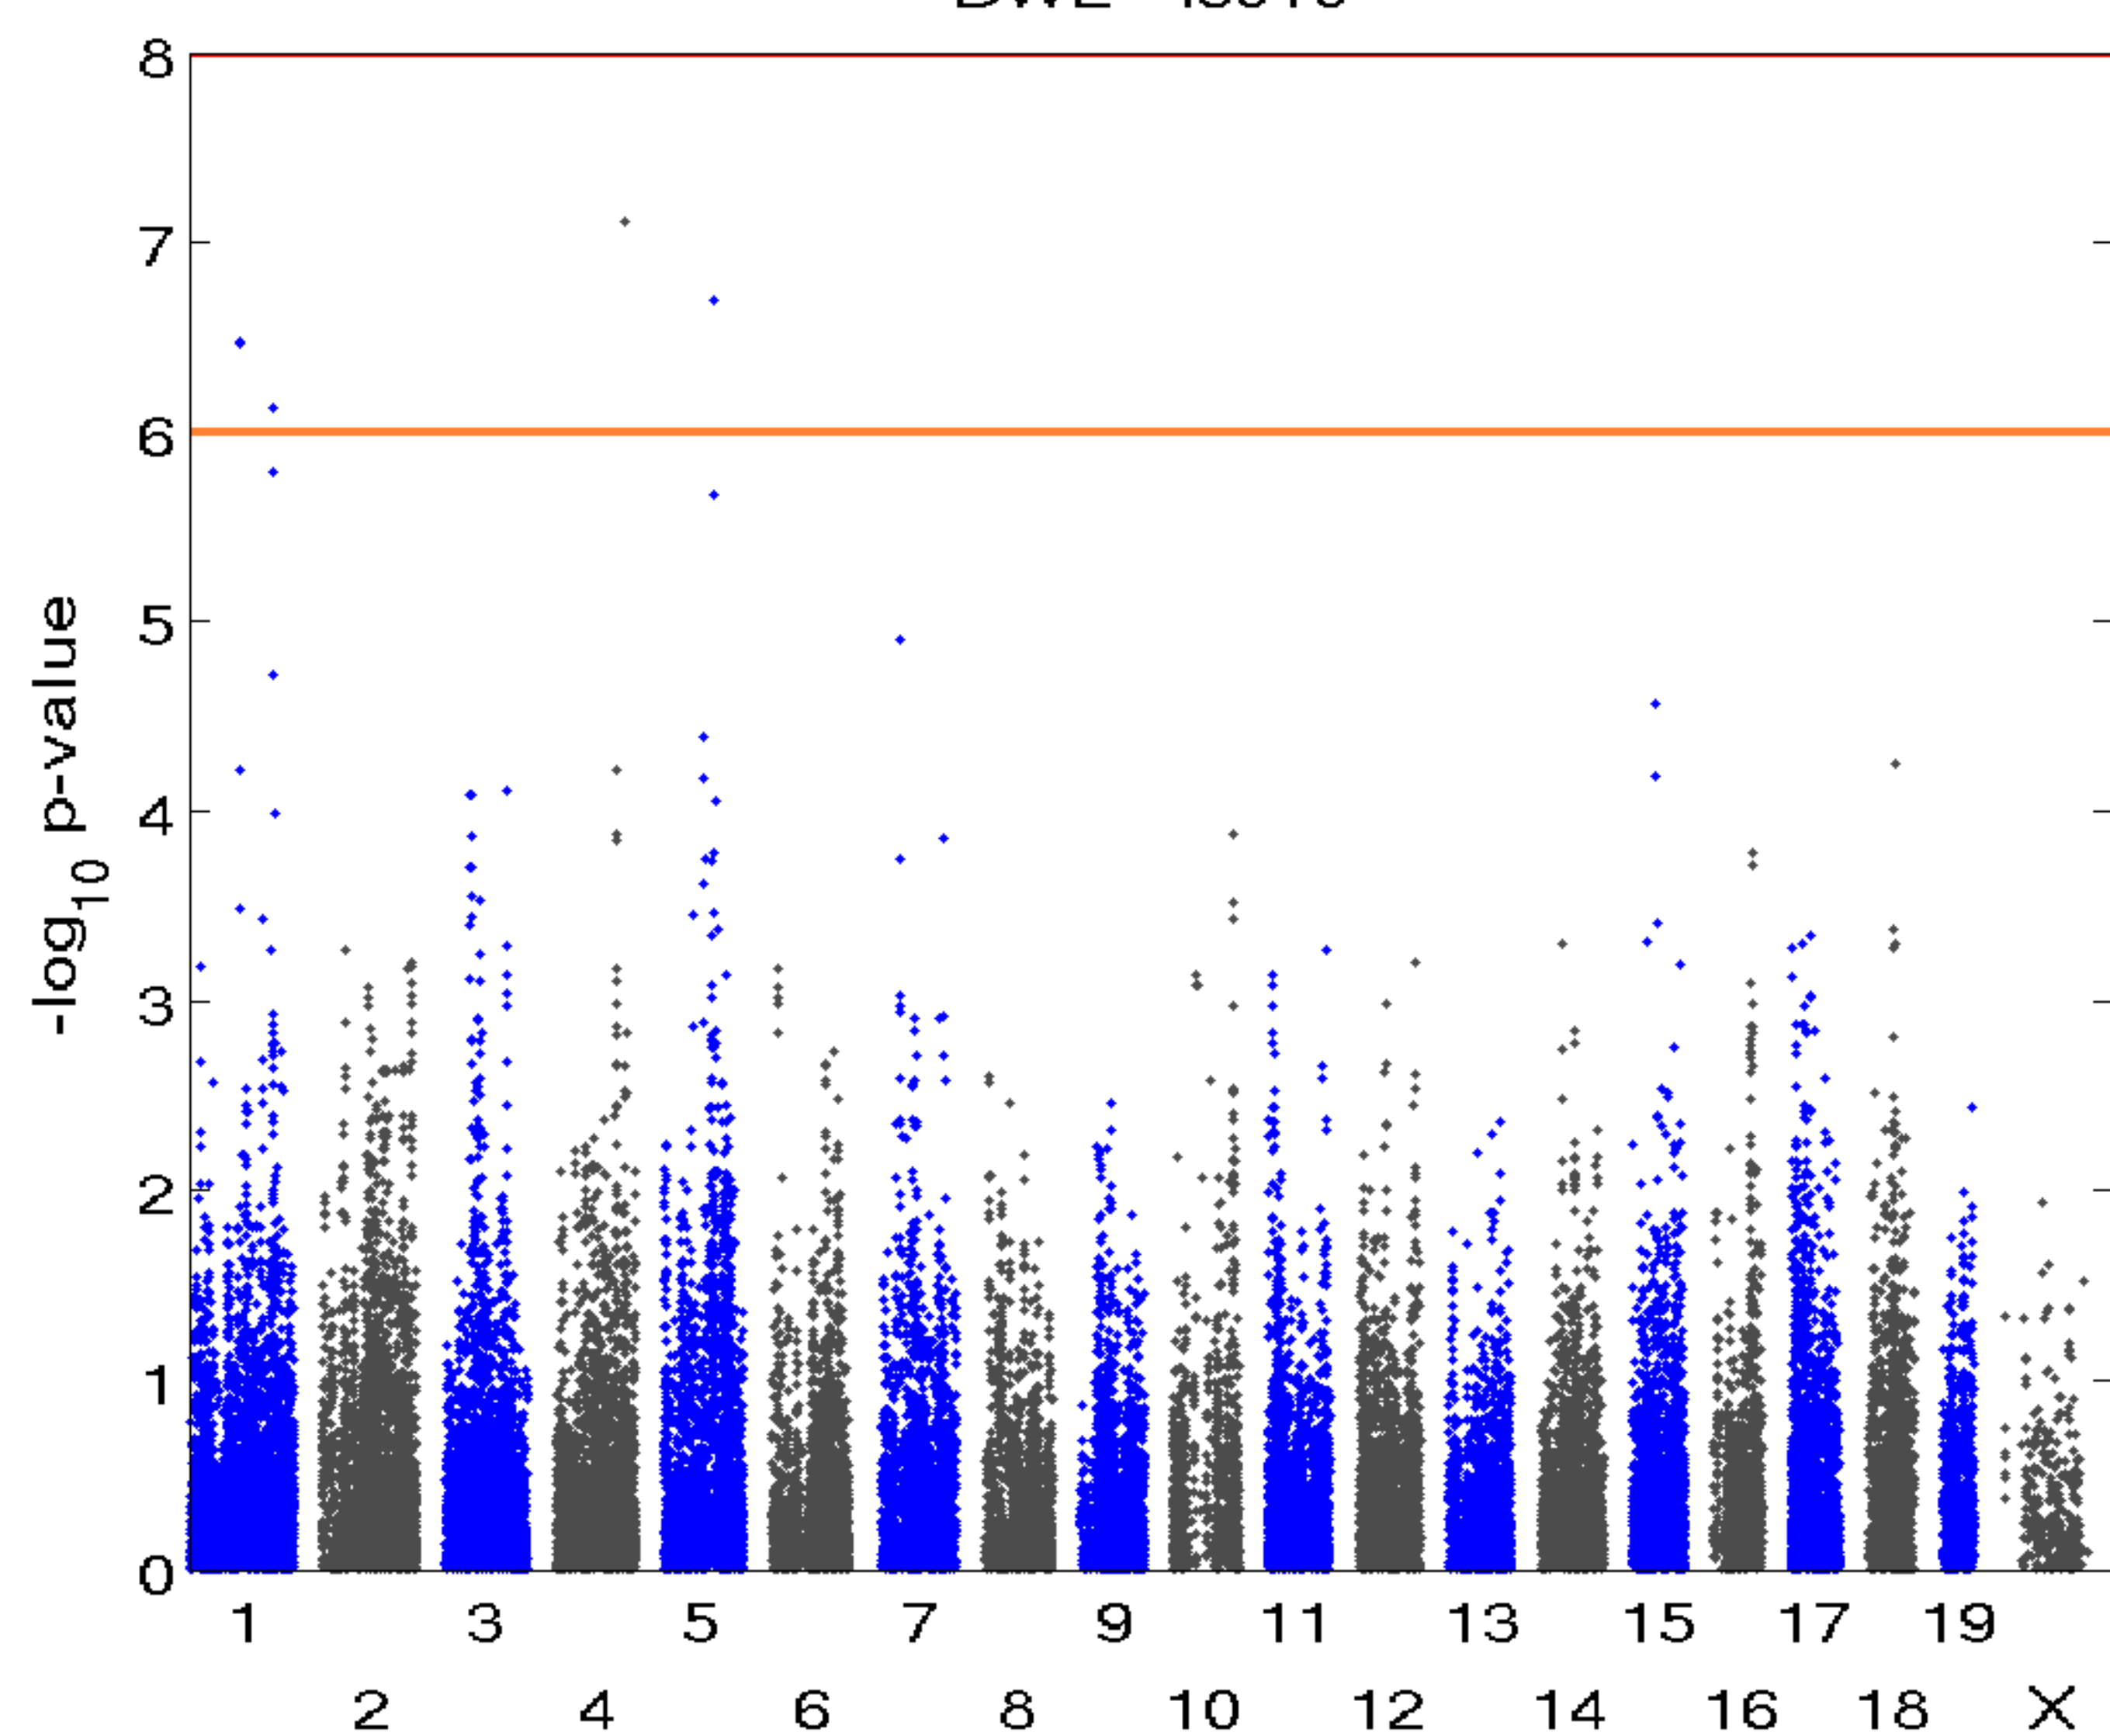

BWE - iso10

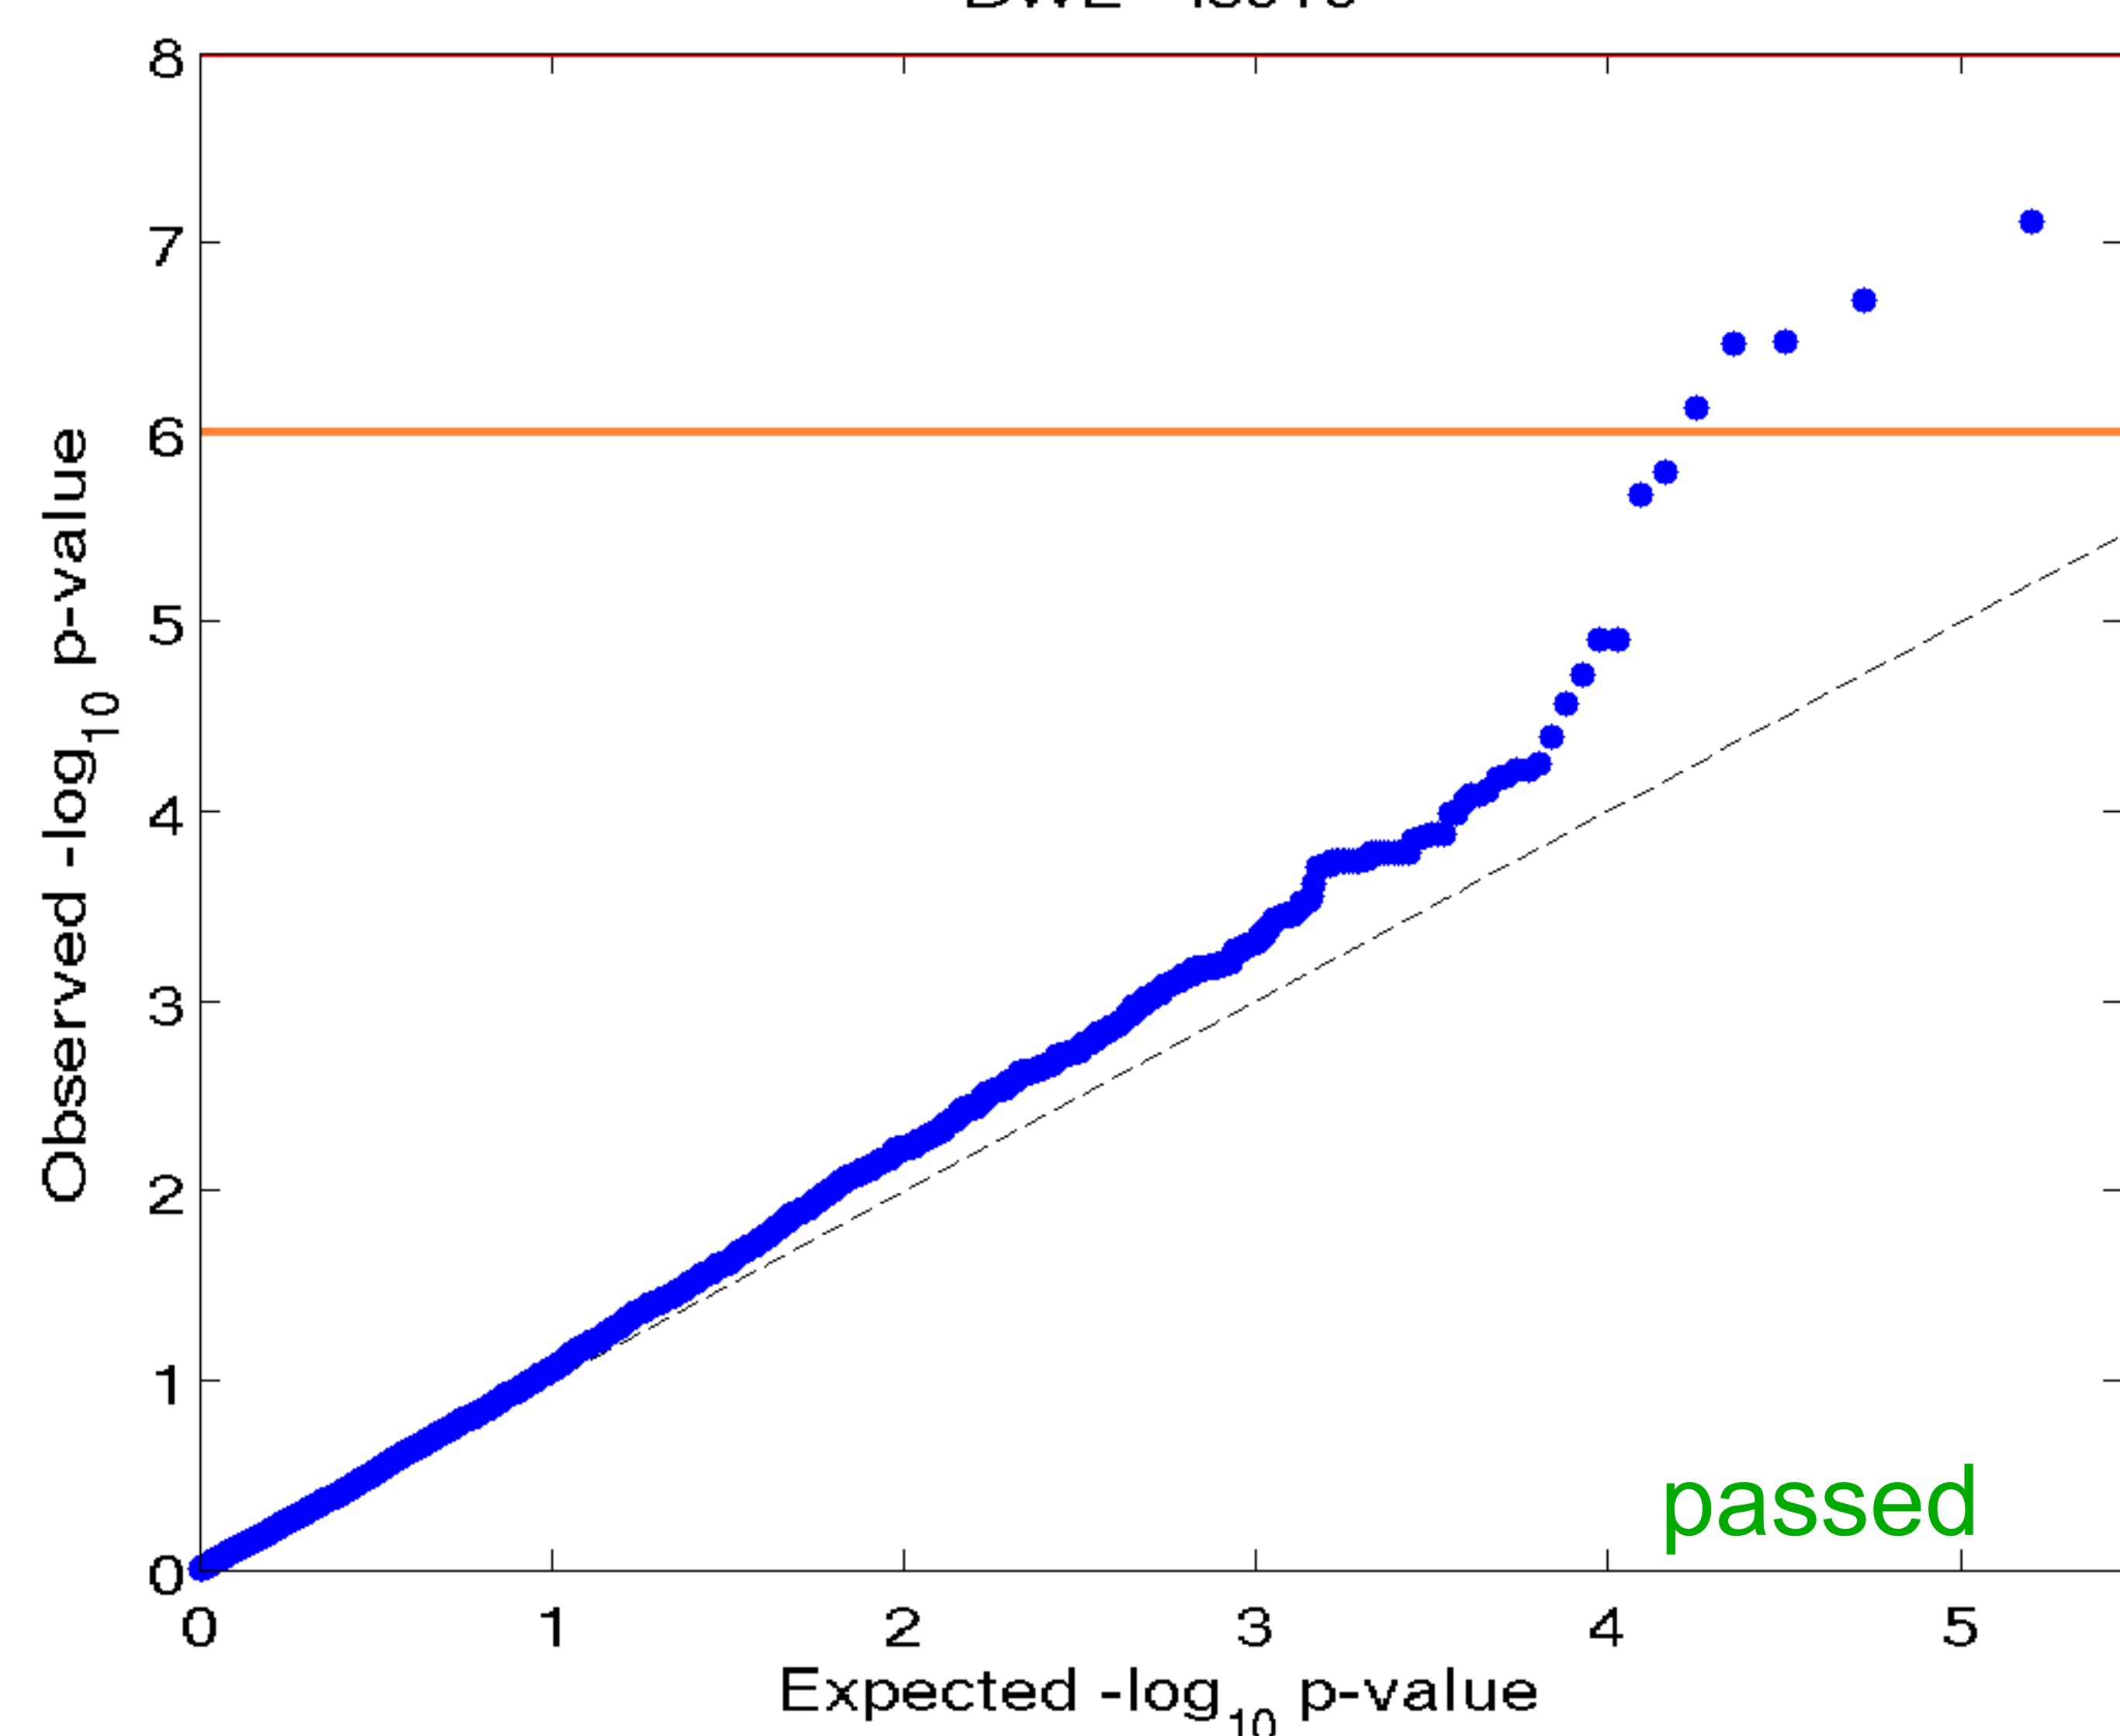

HR-ECG - iso10

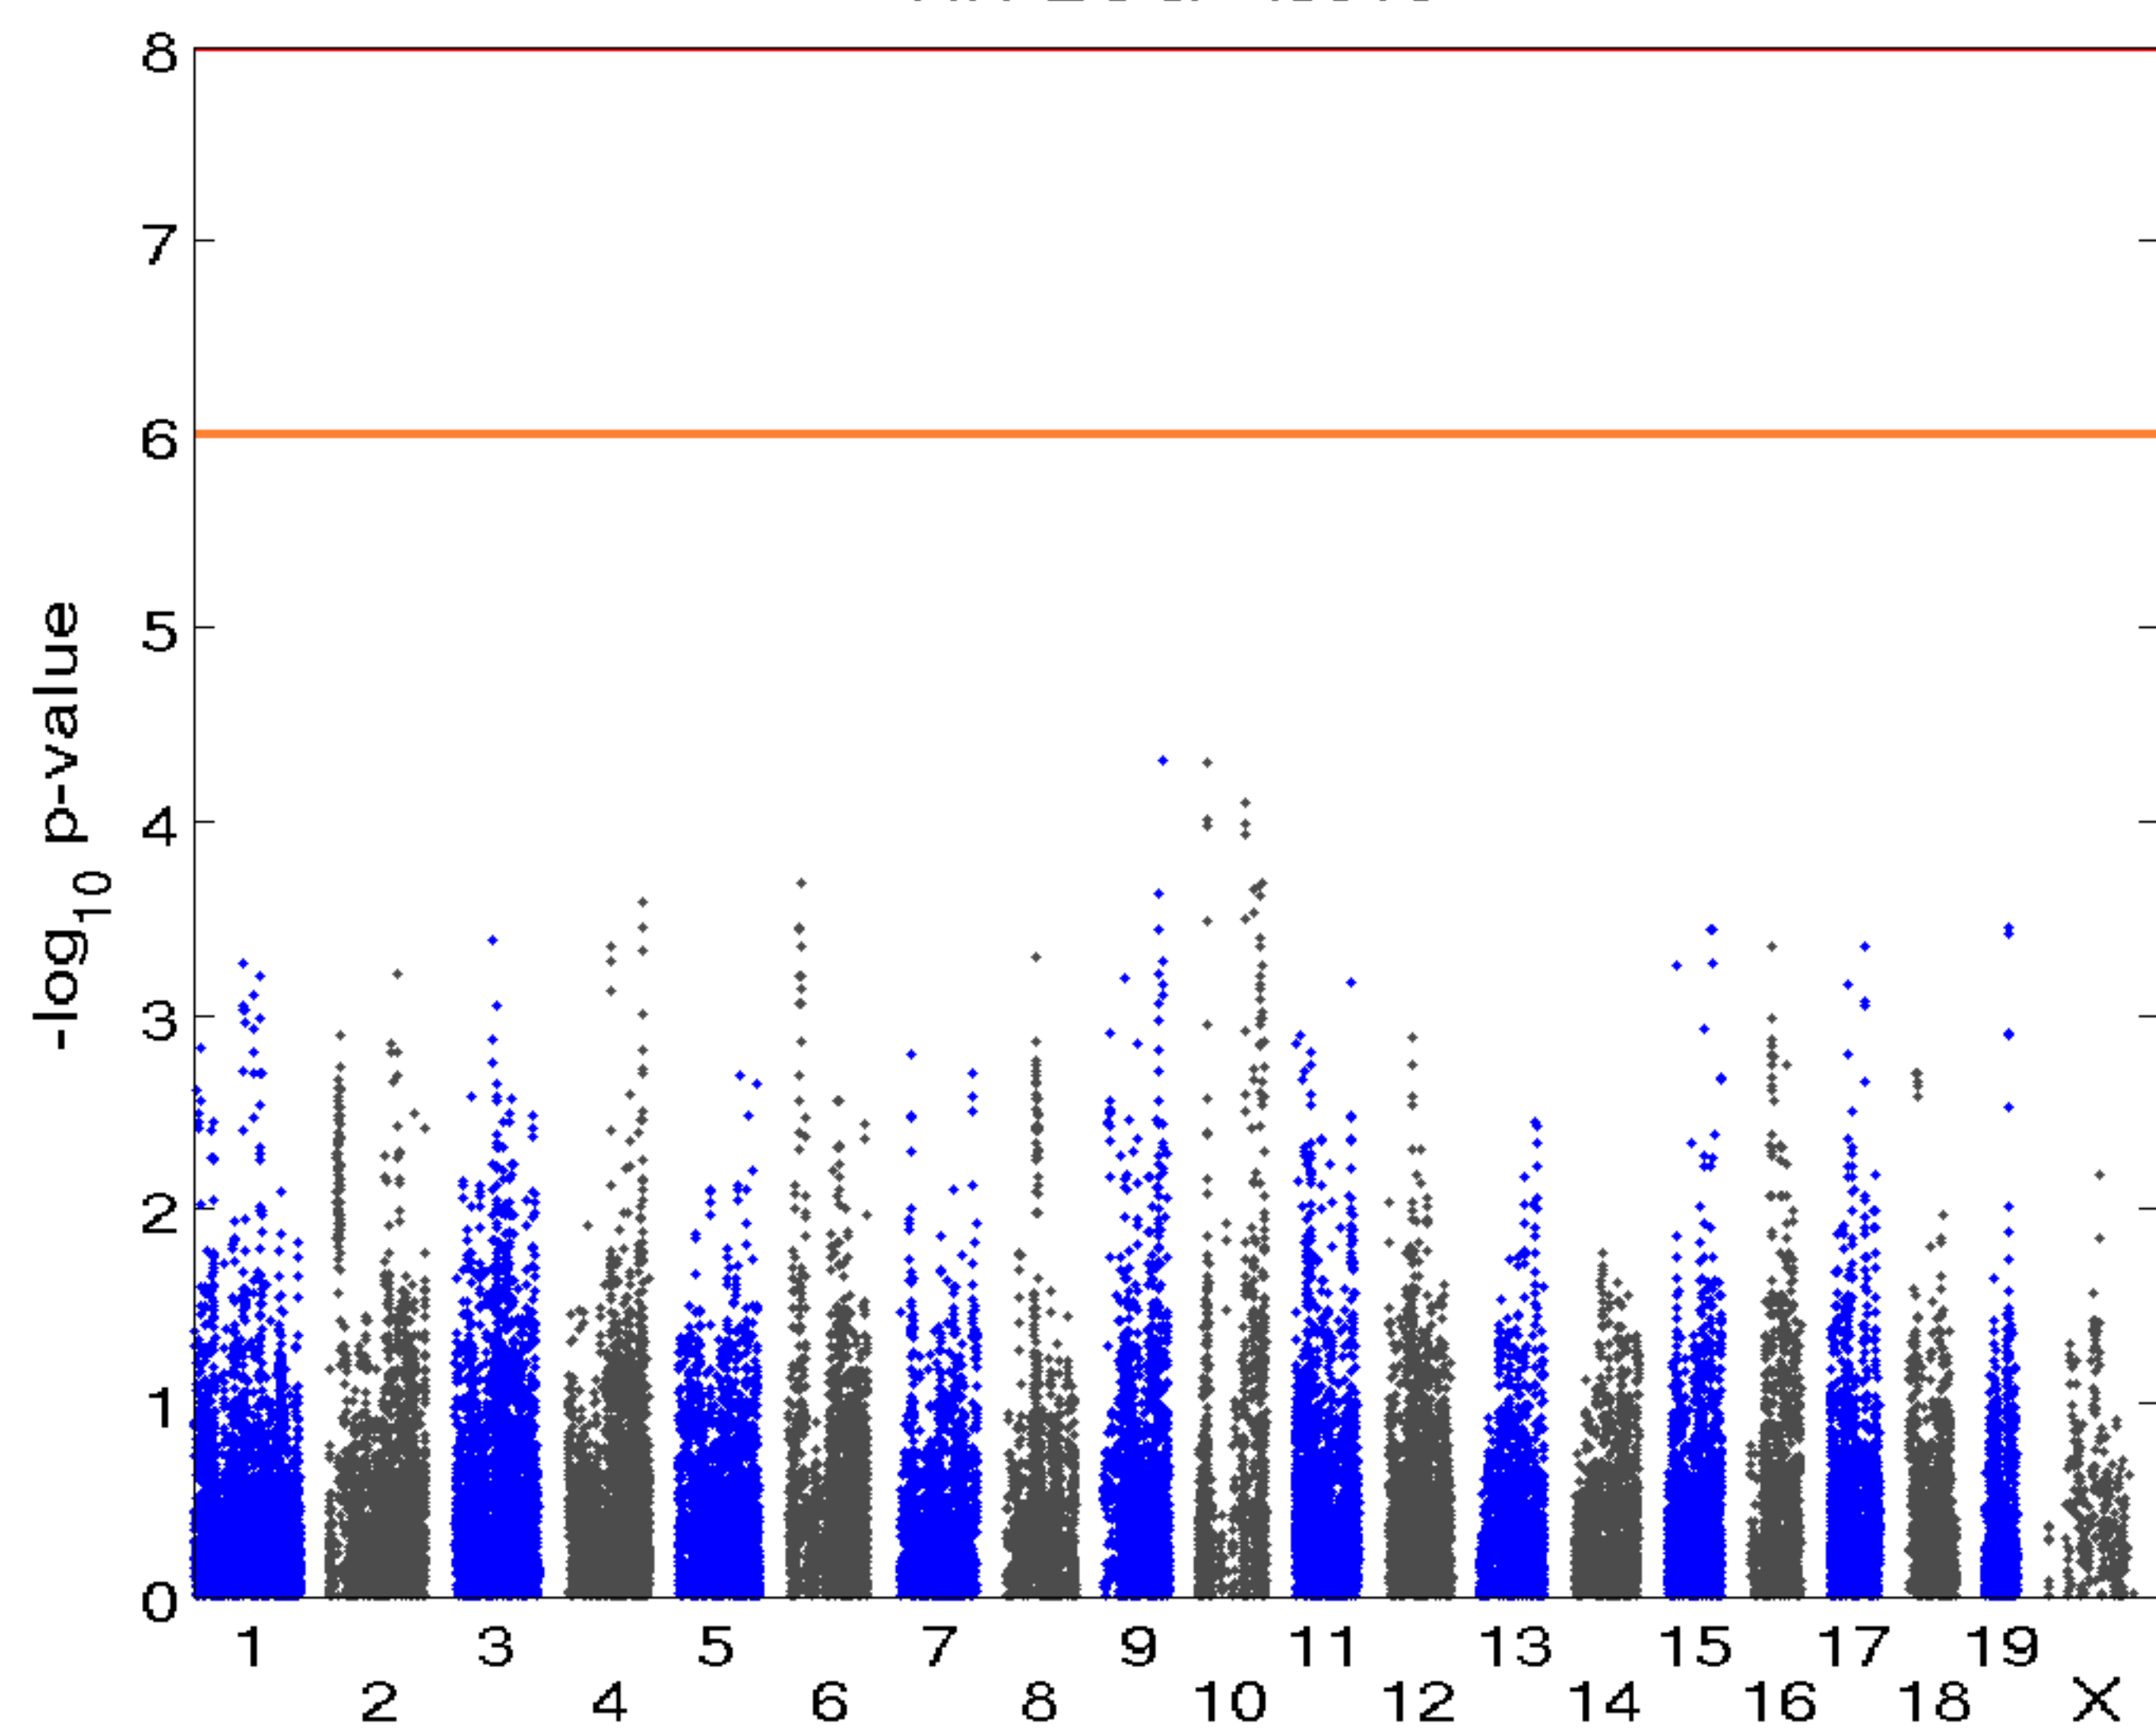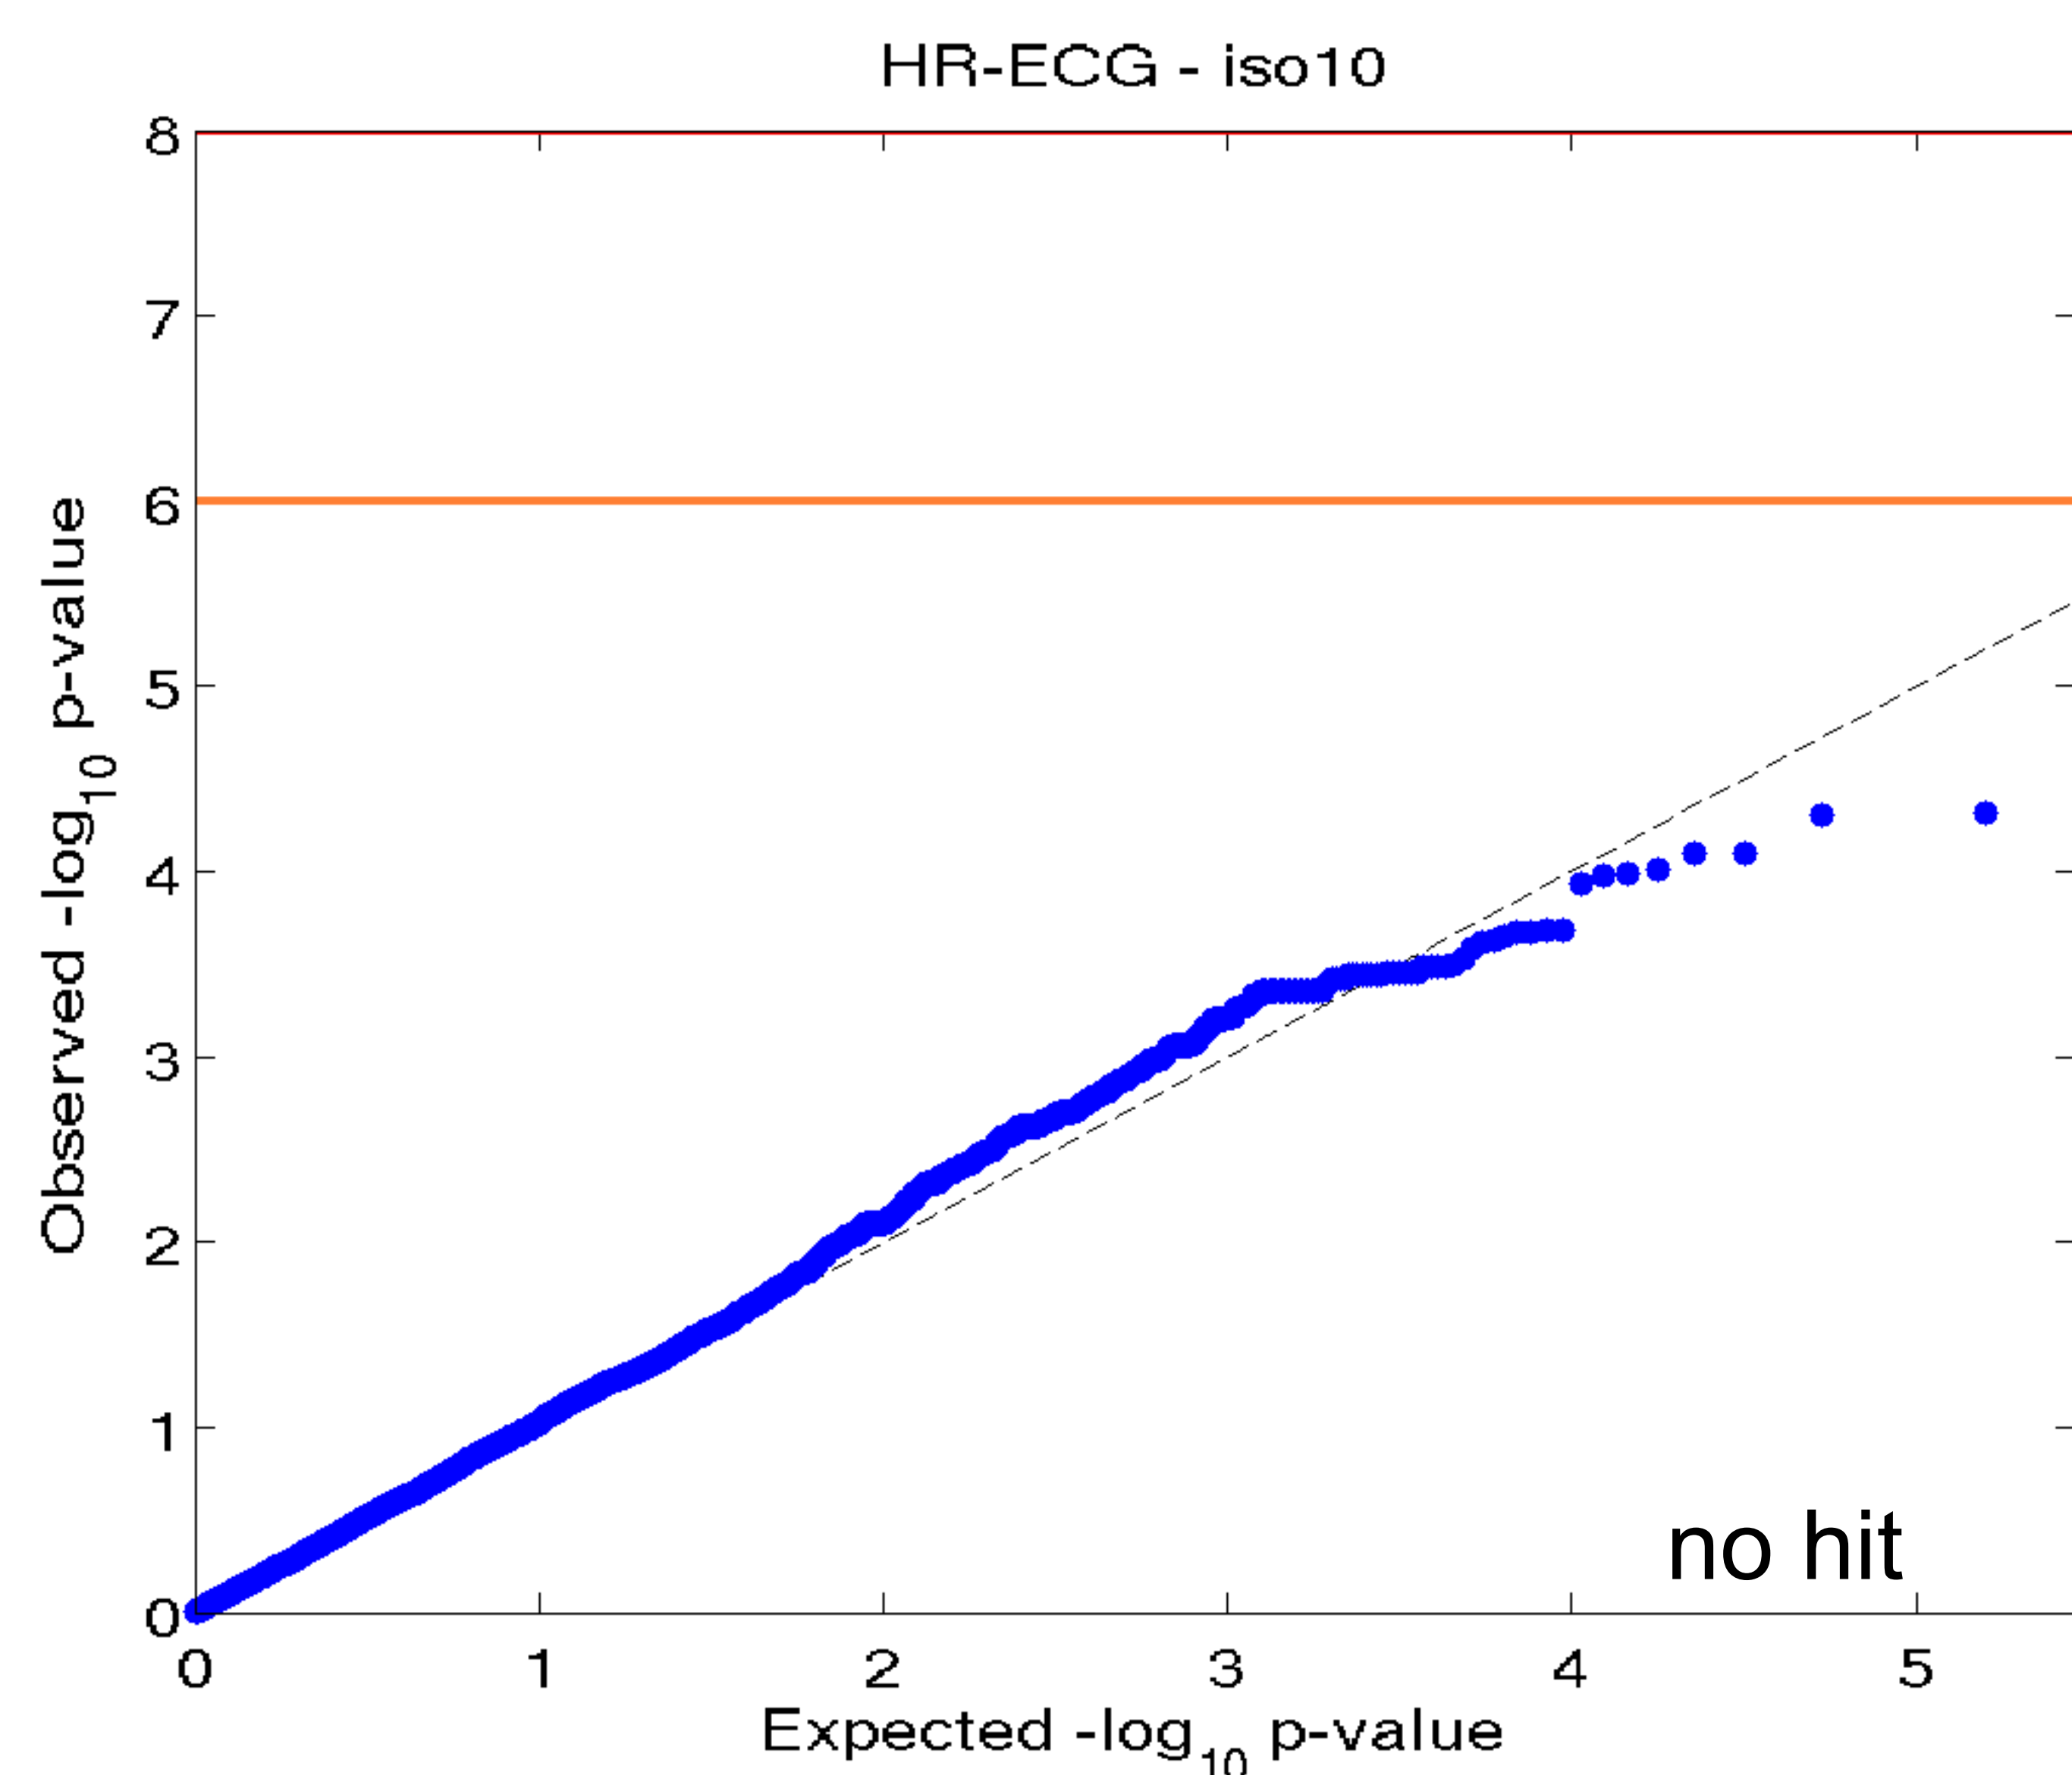

HR-TC - iso10

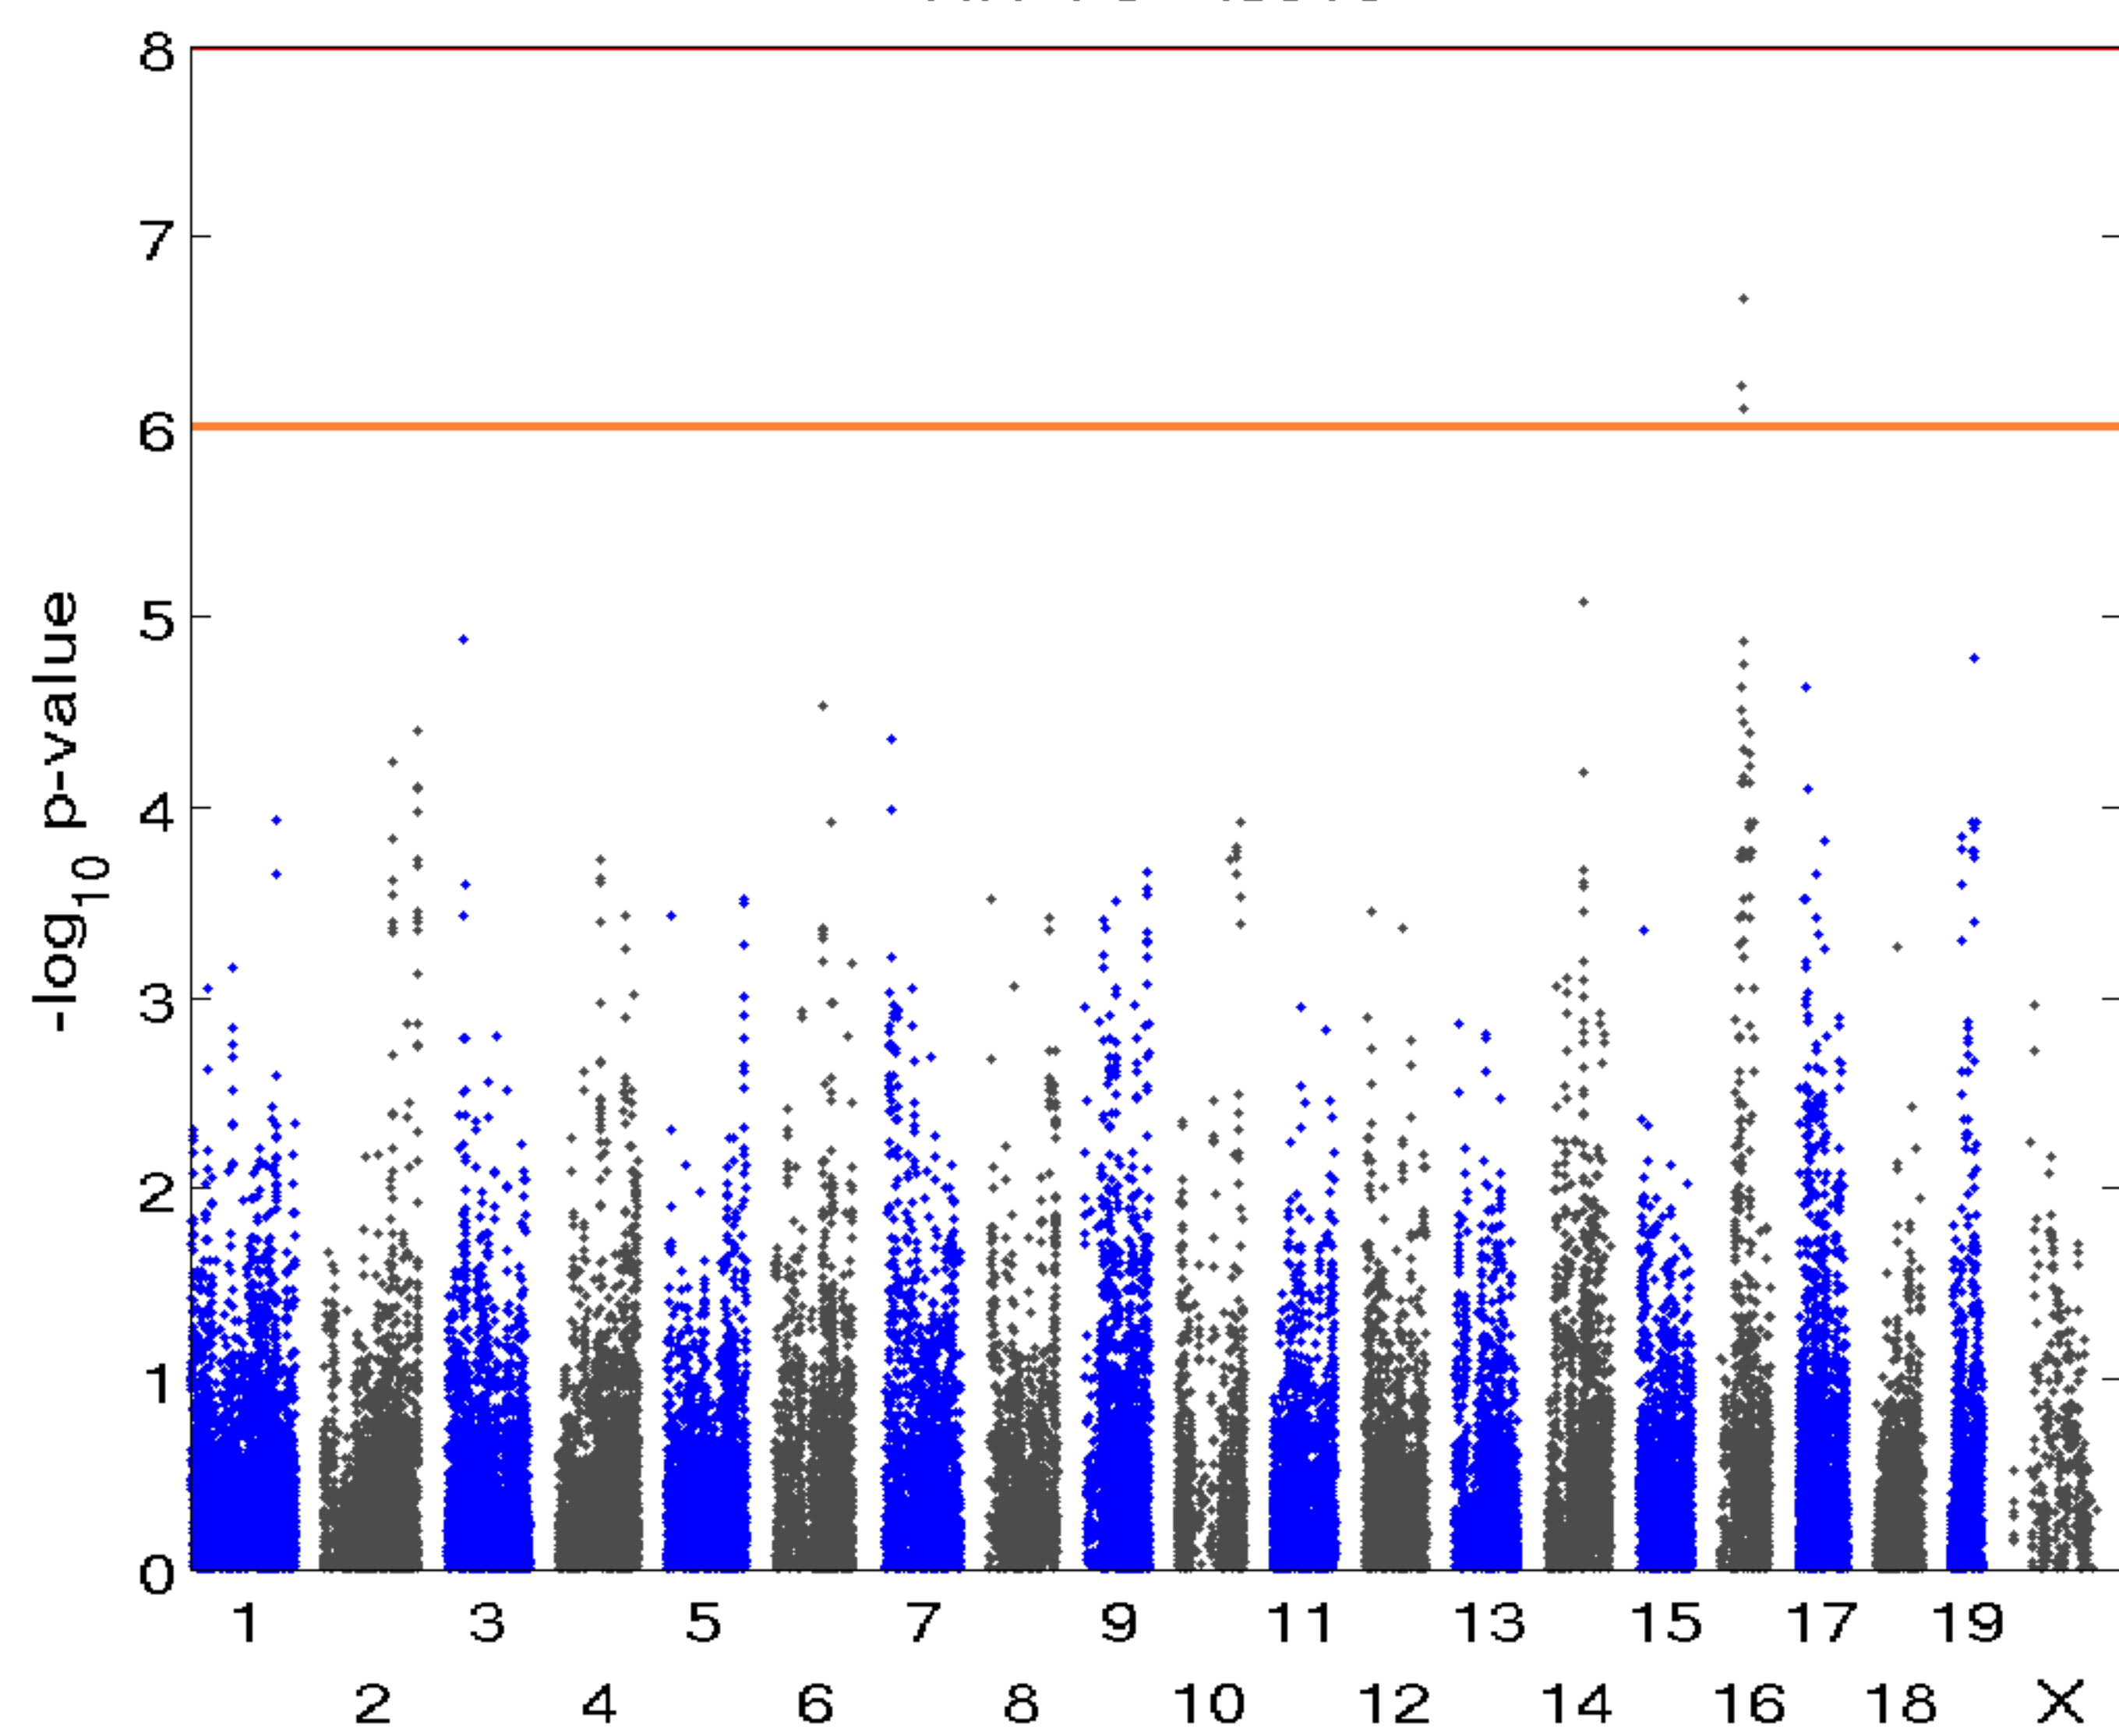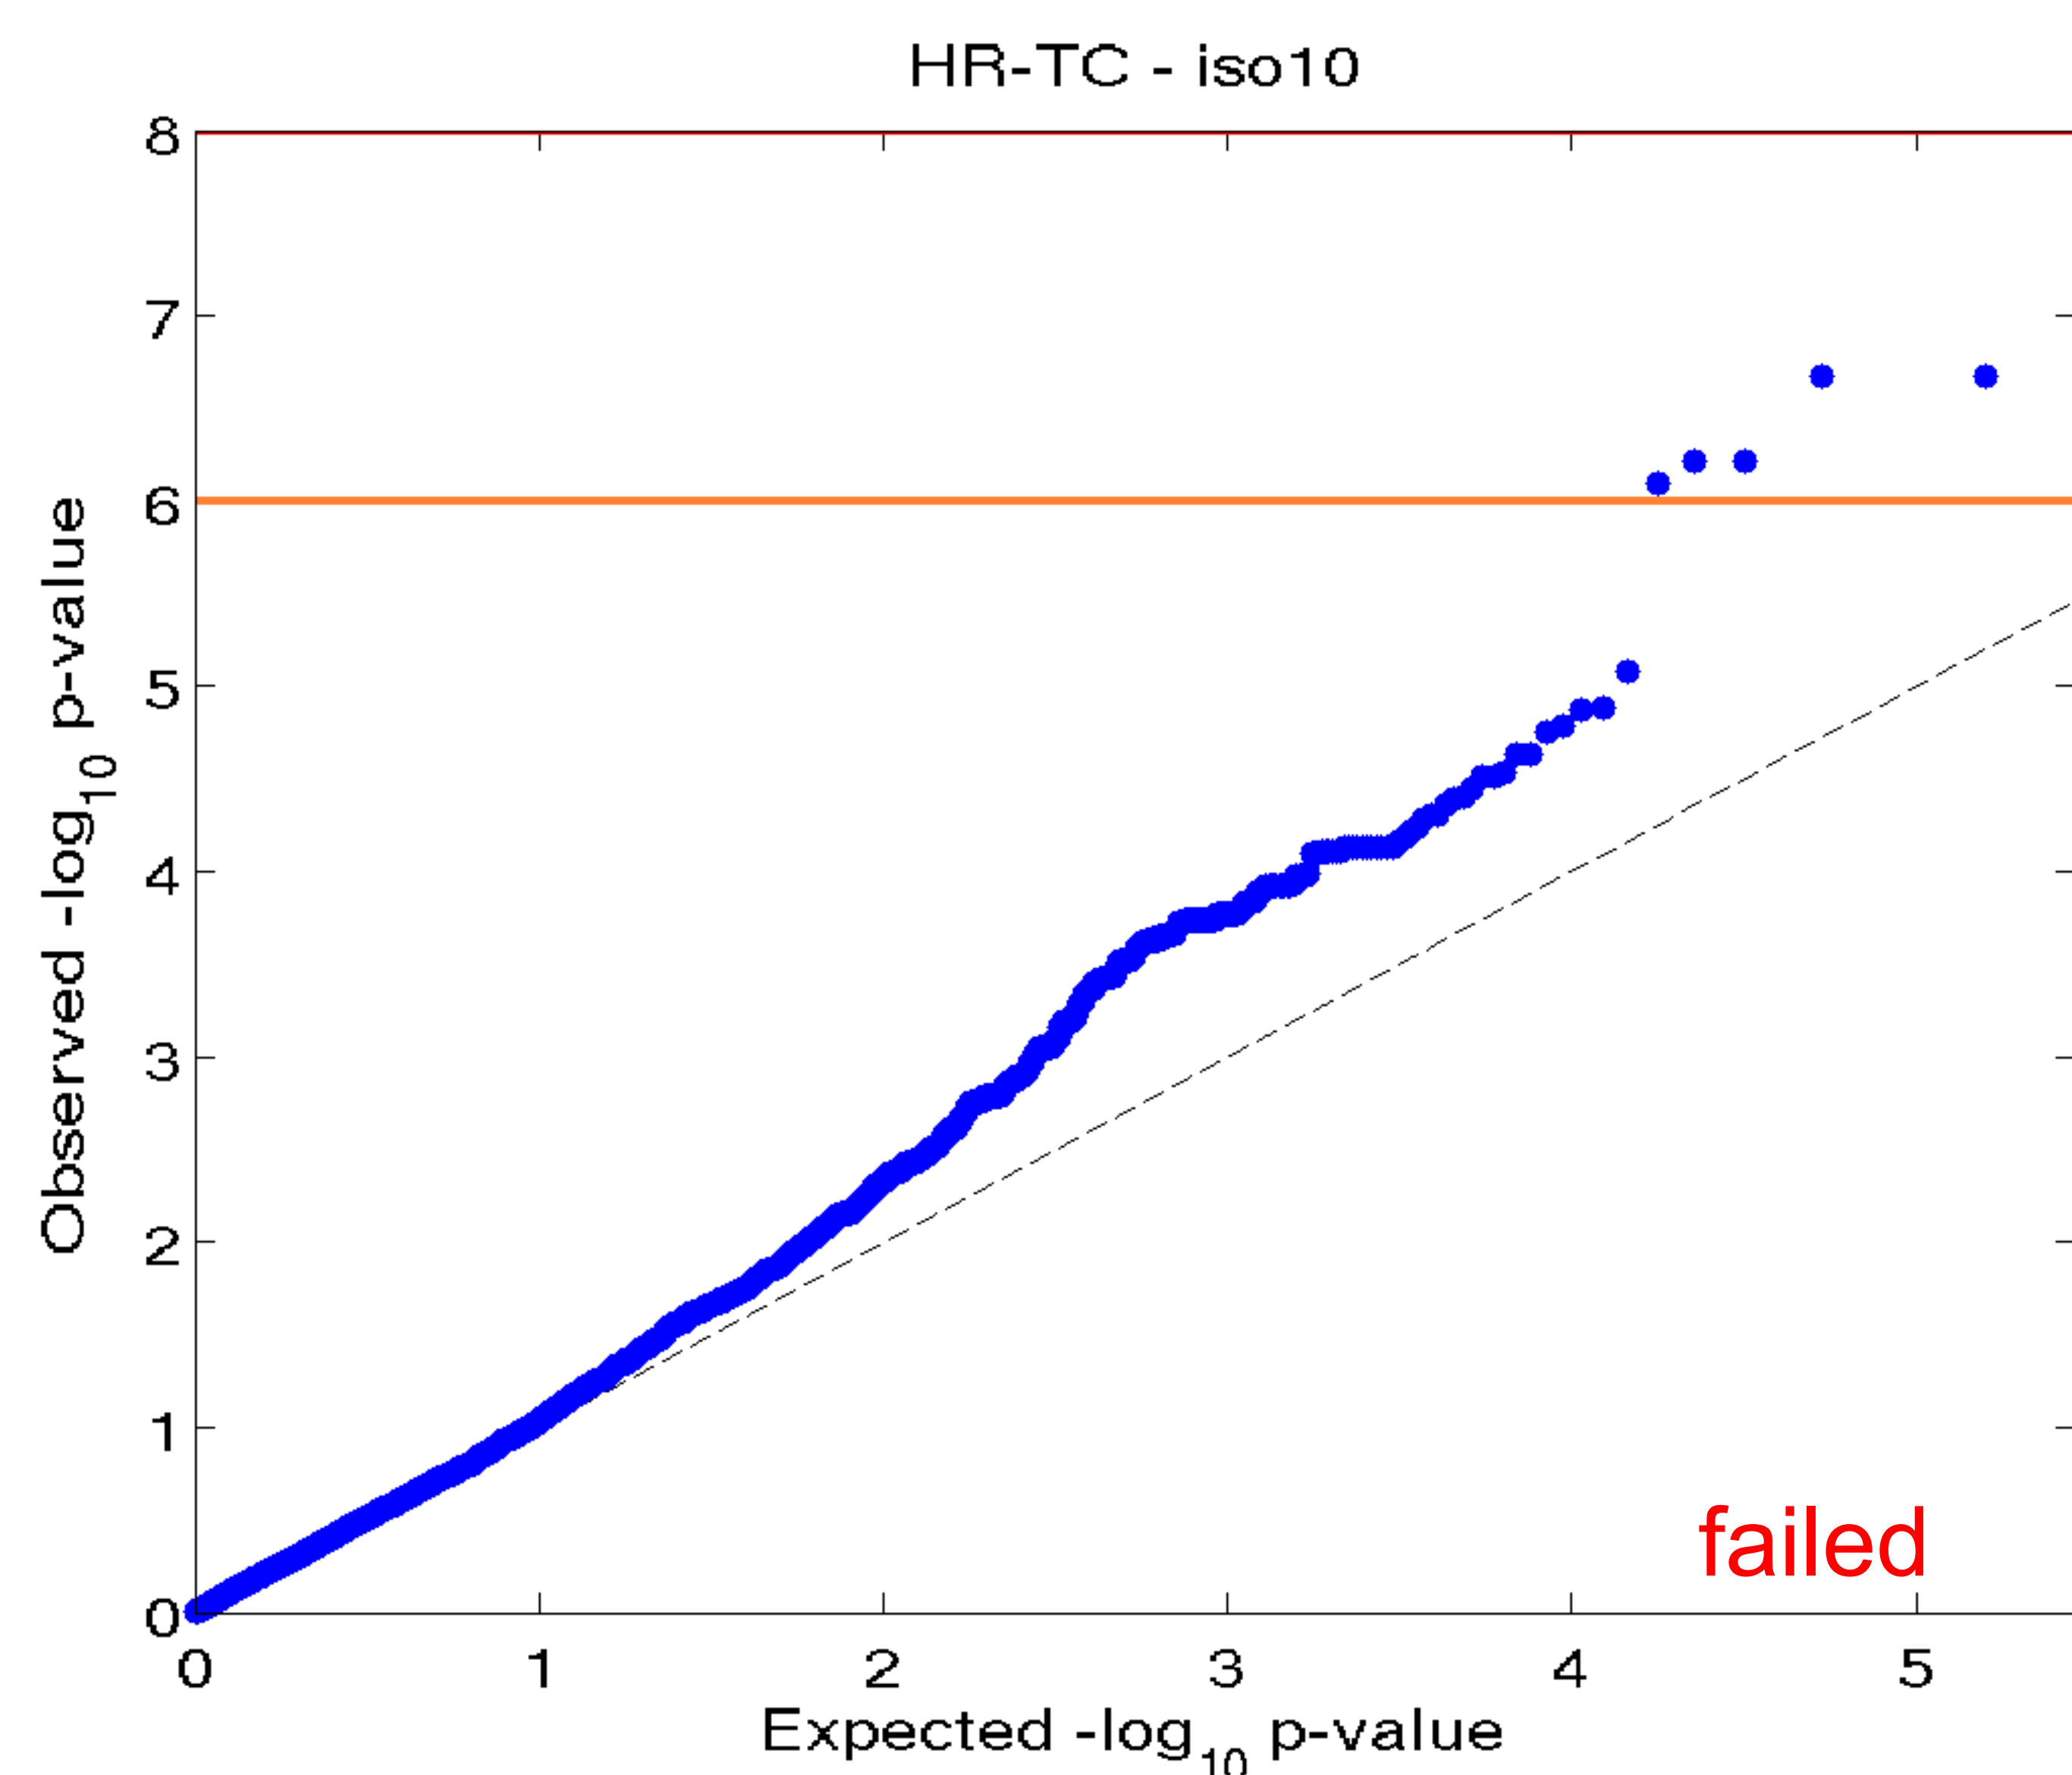

HW - iso10

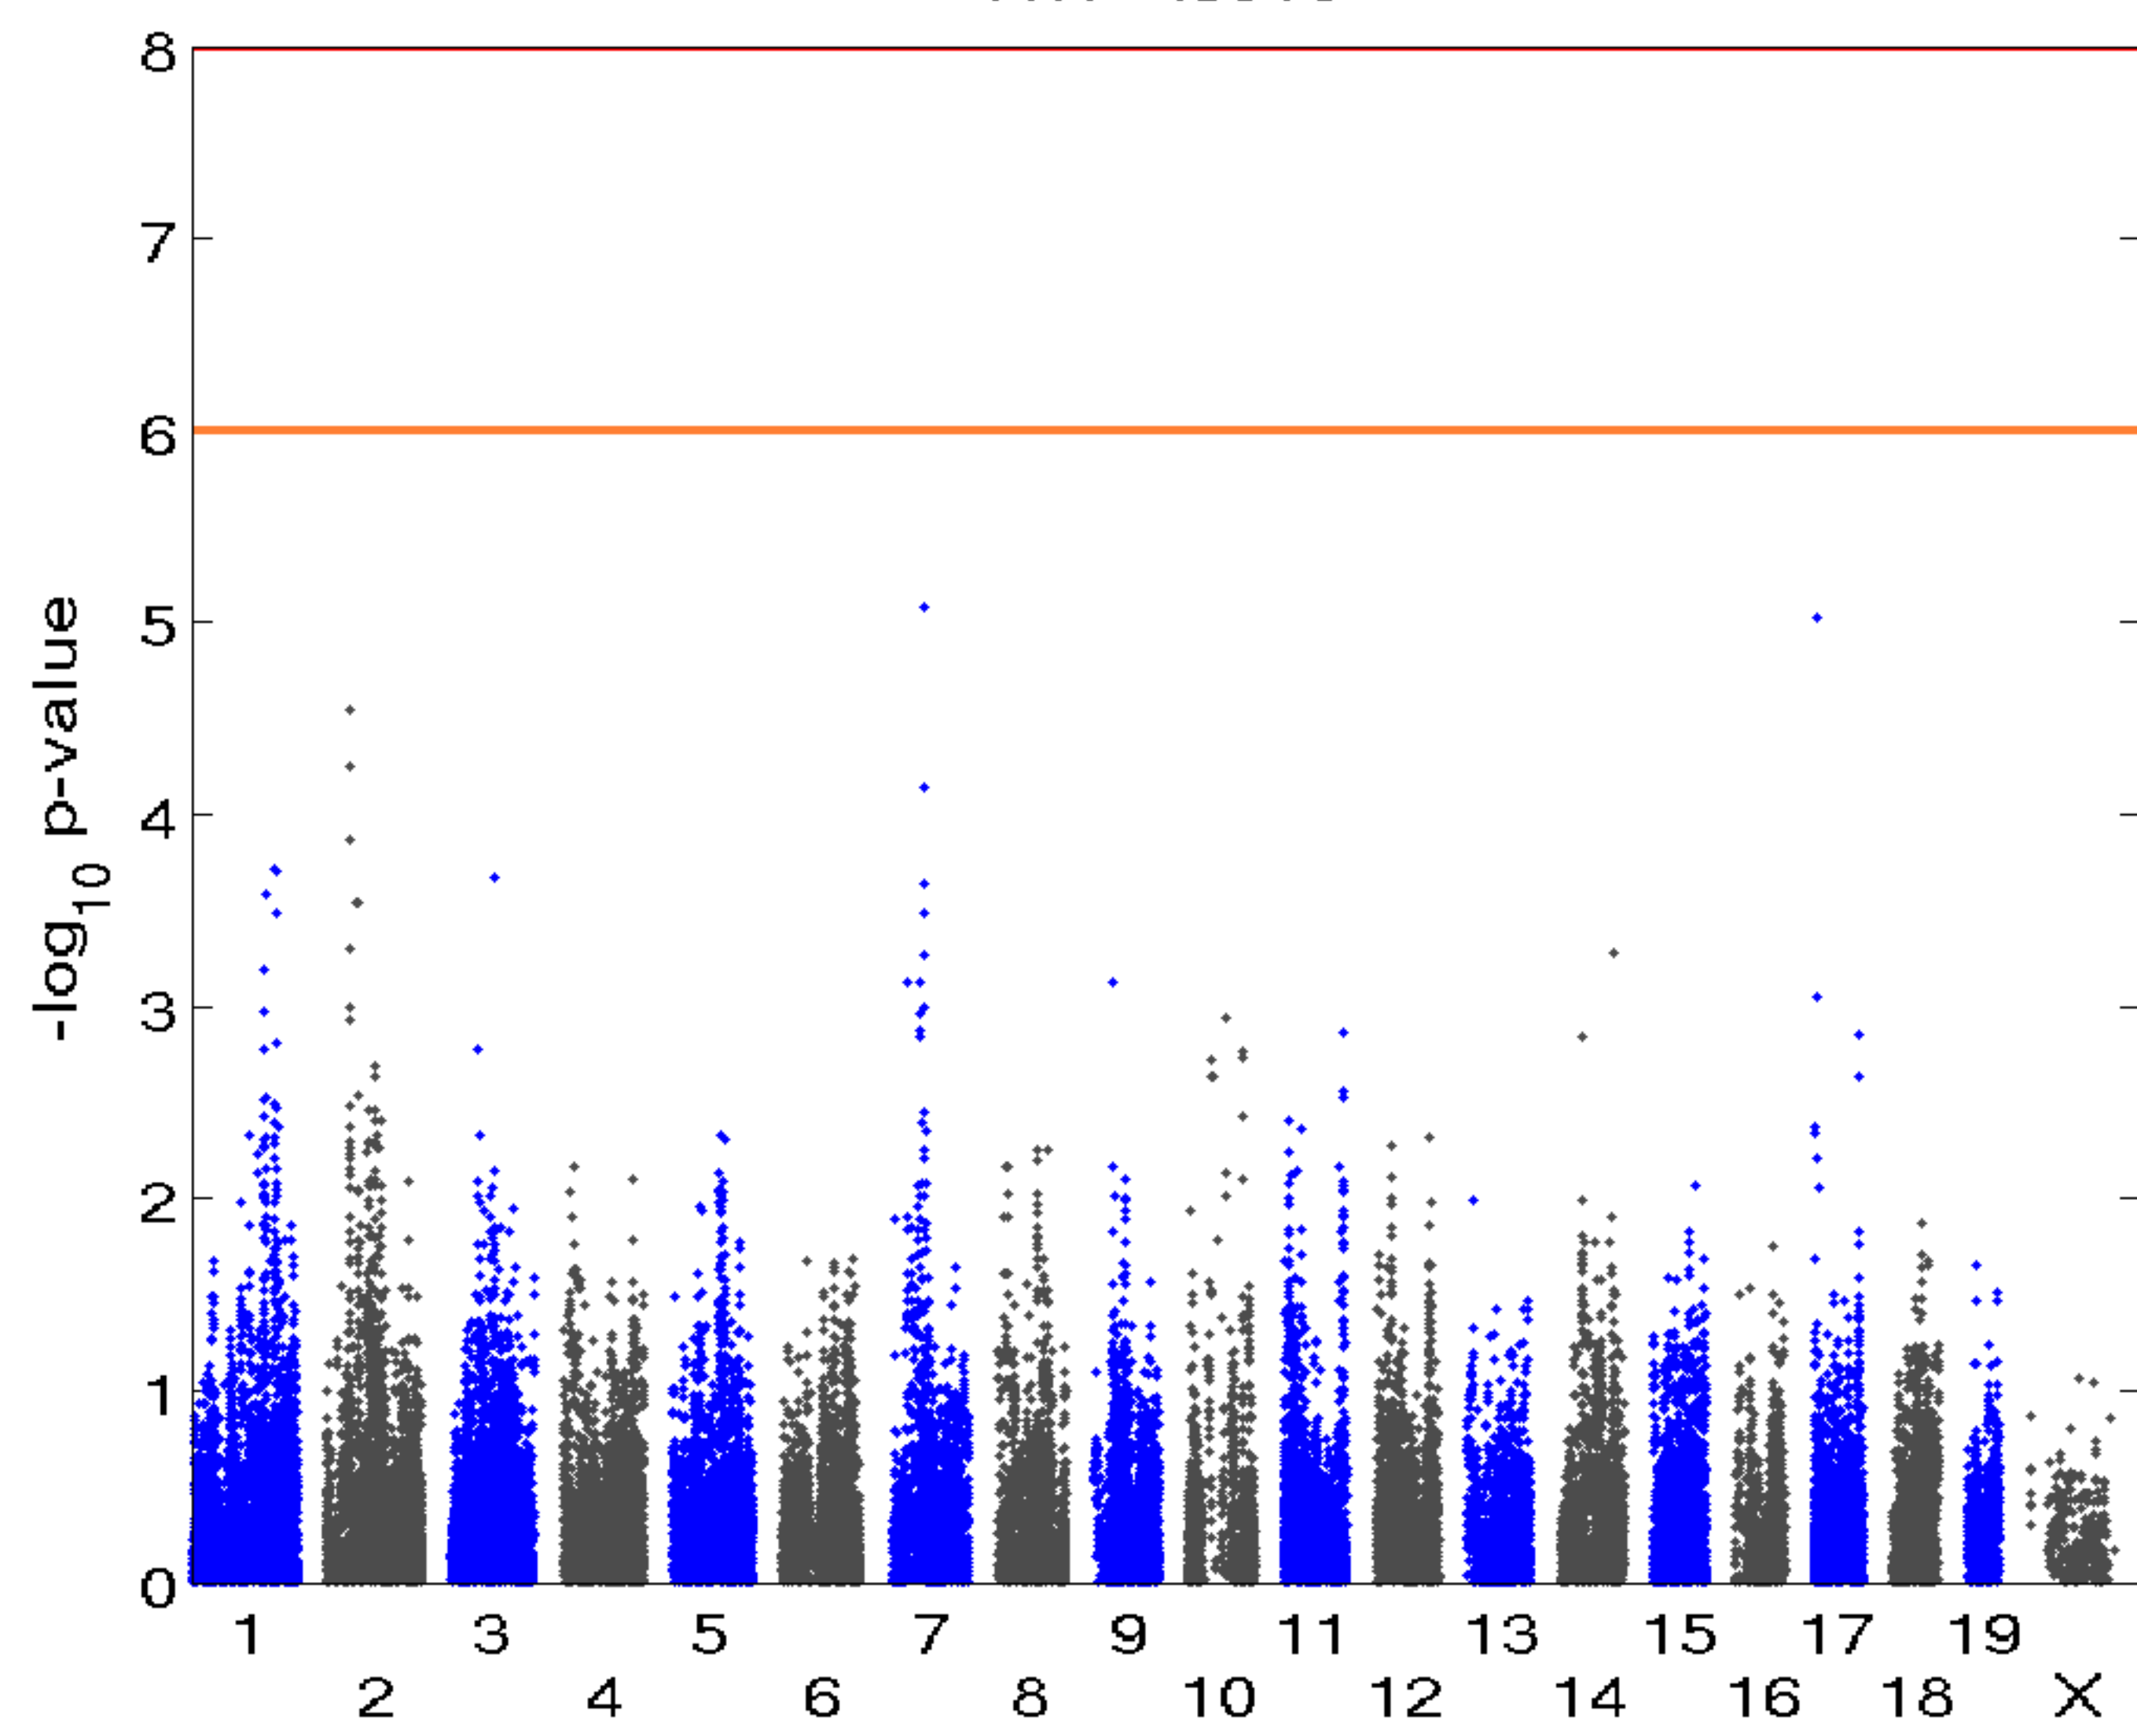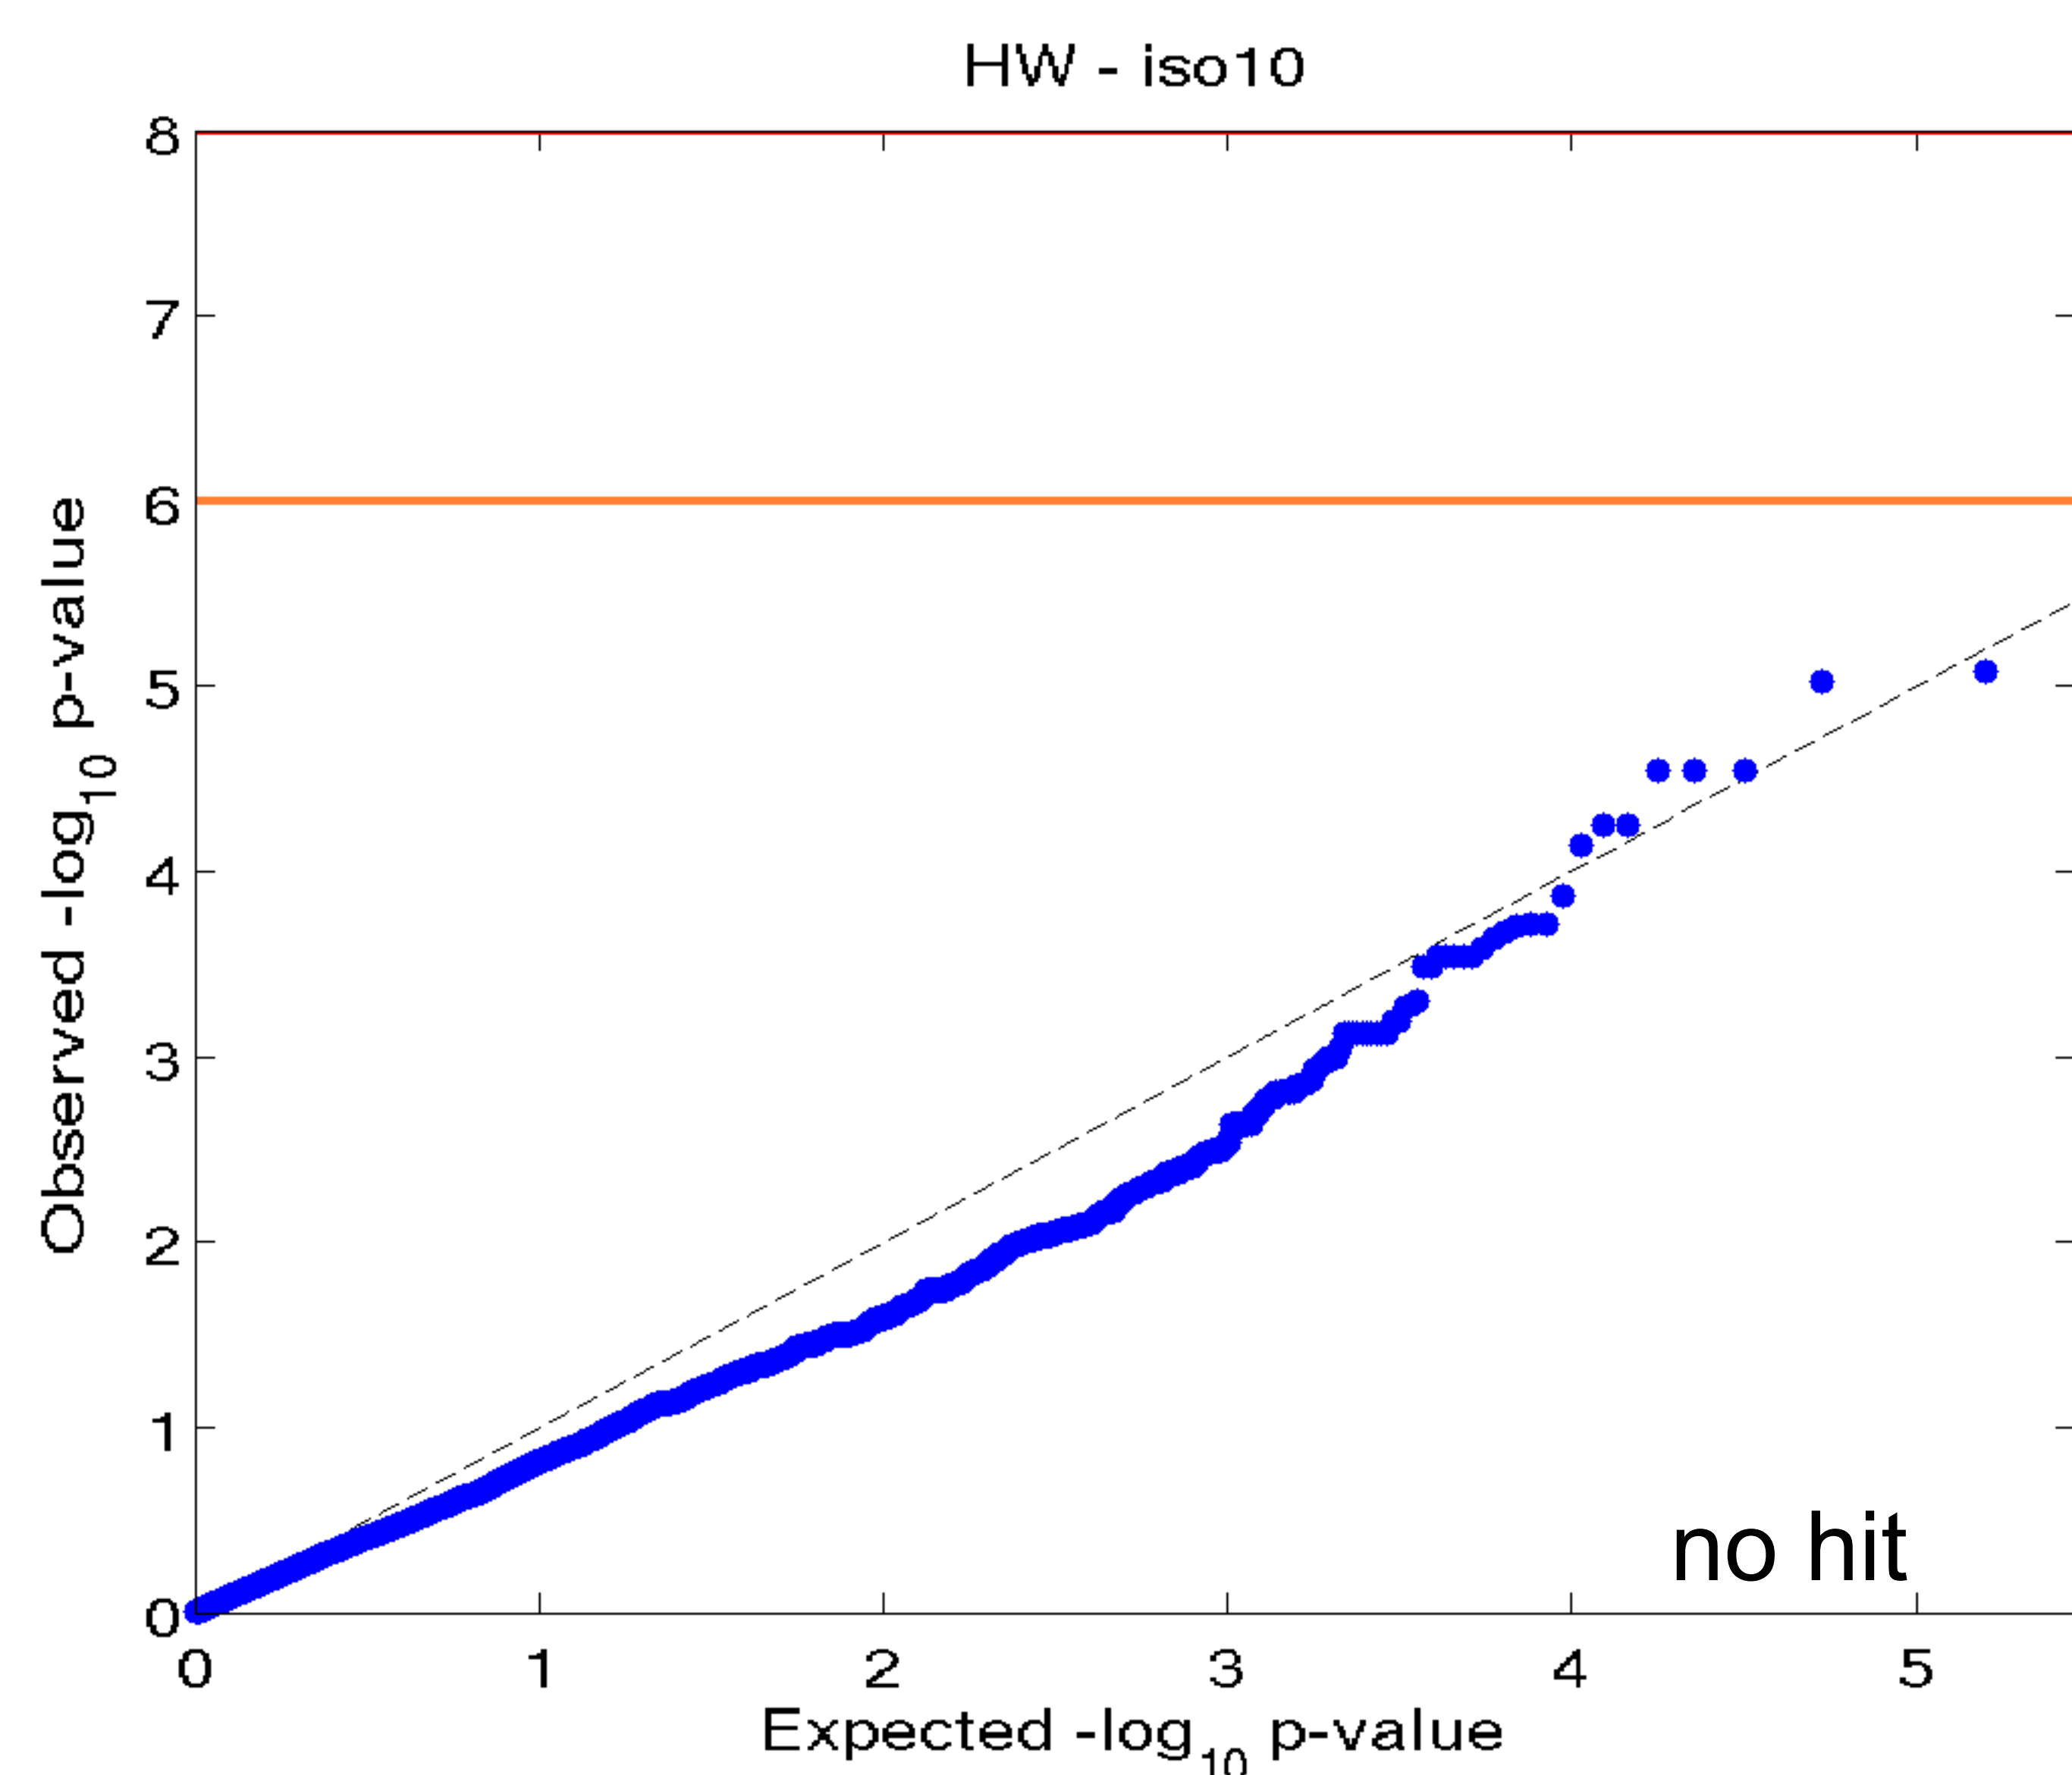



Pamp - iso10

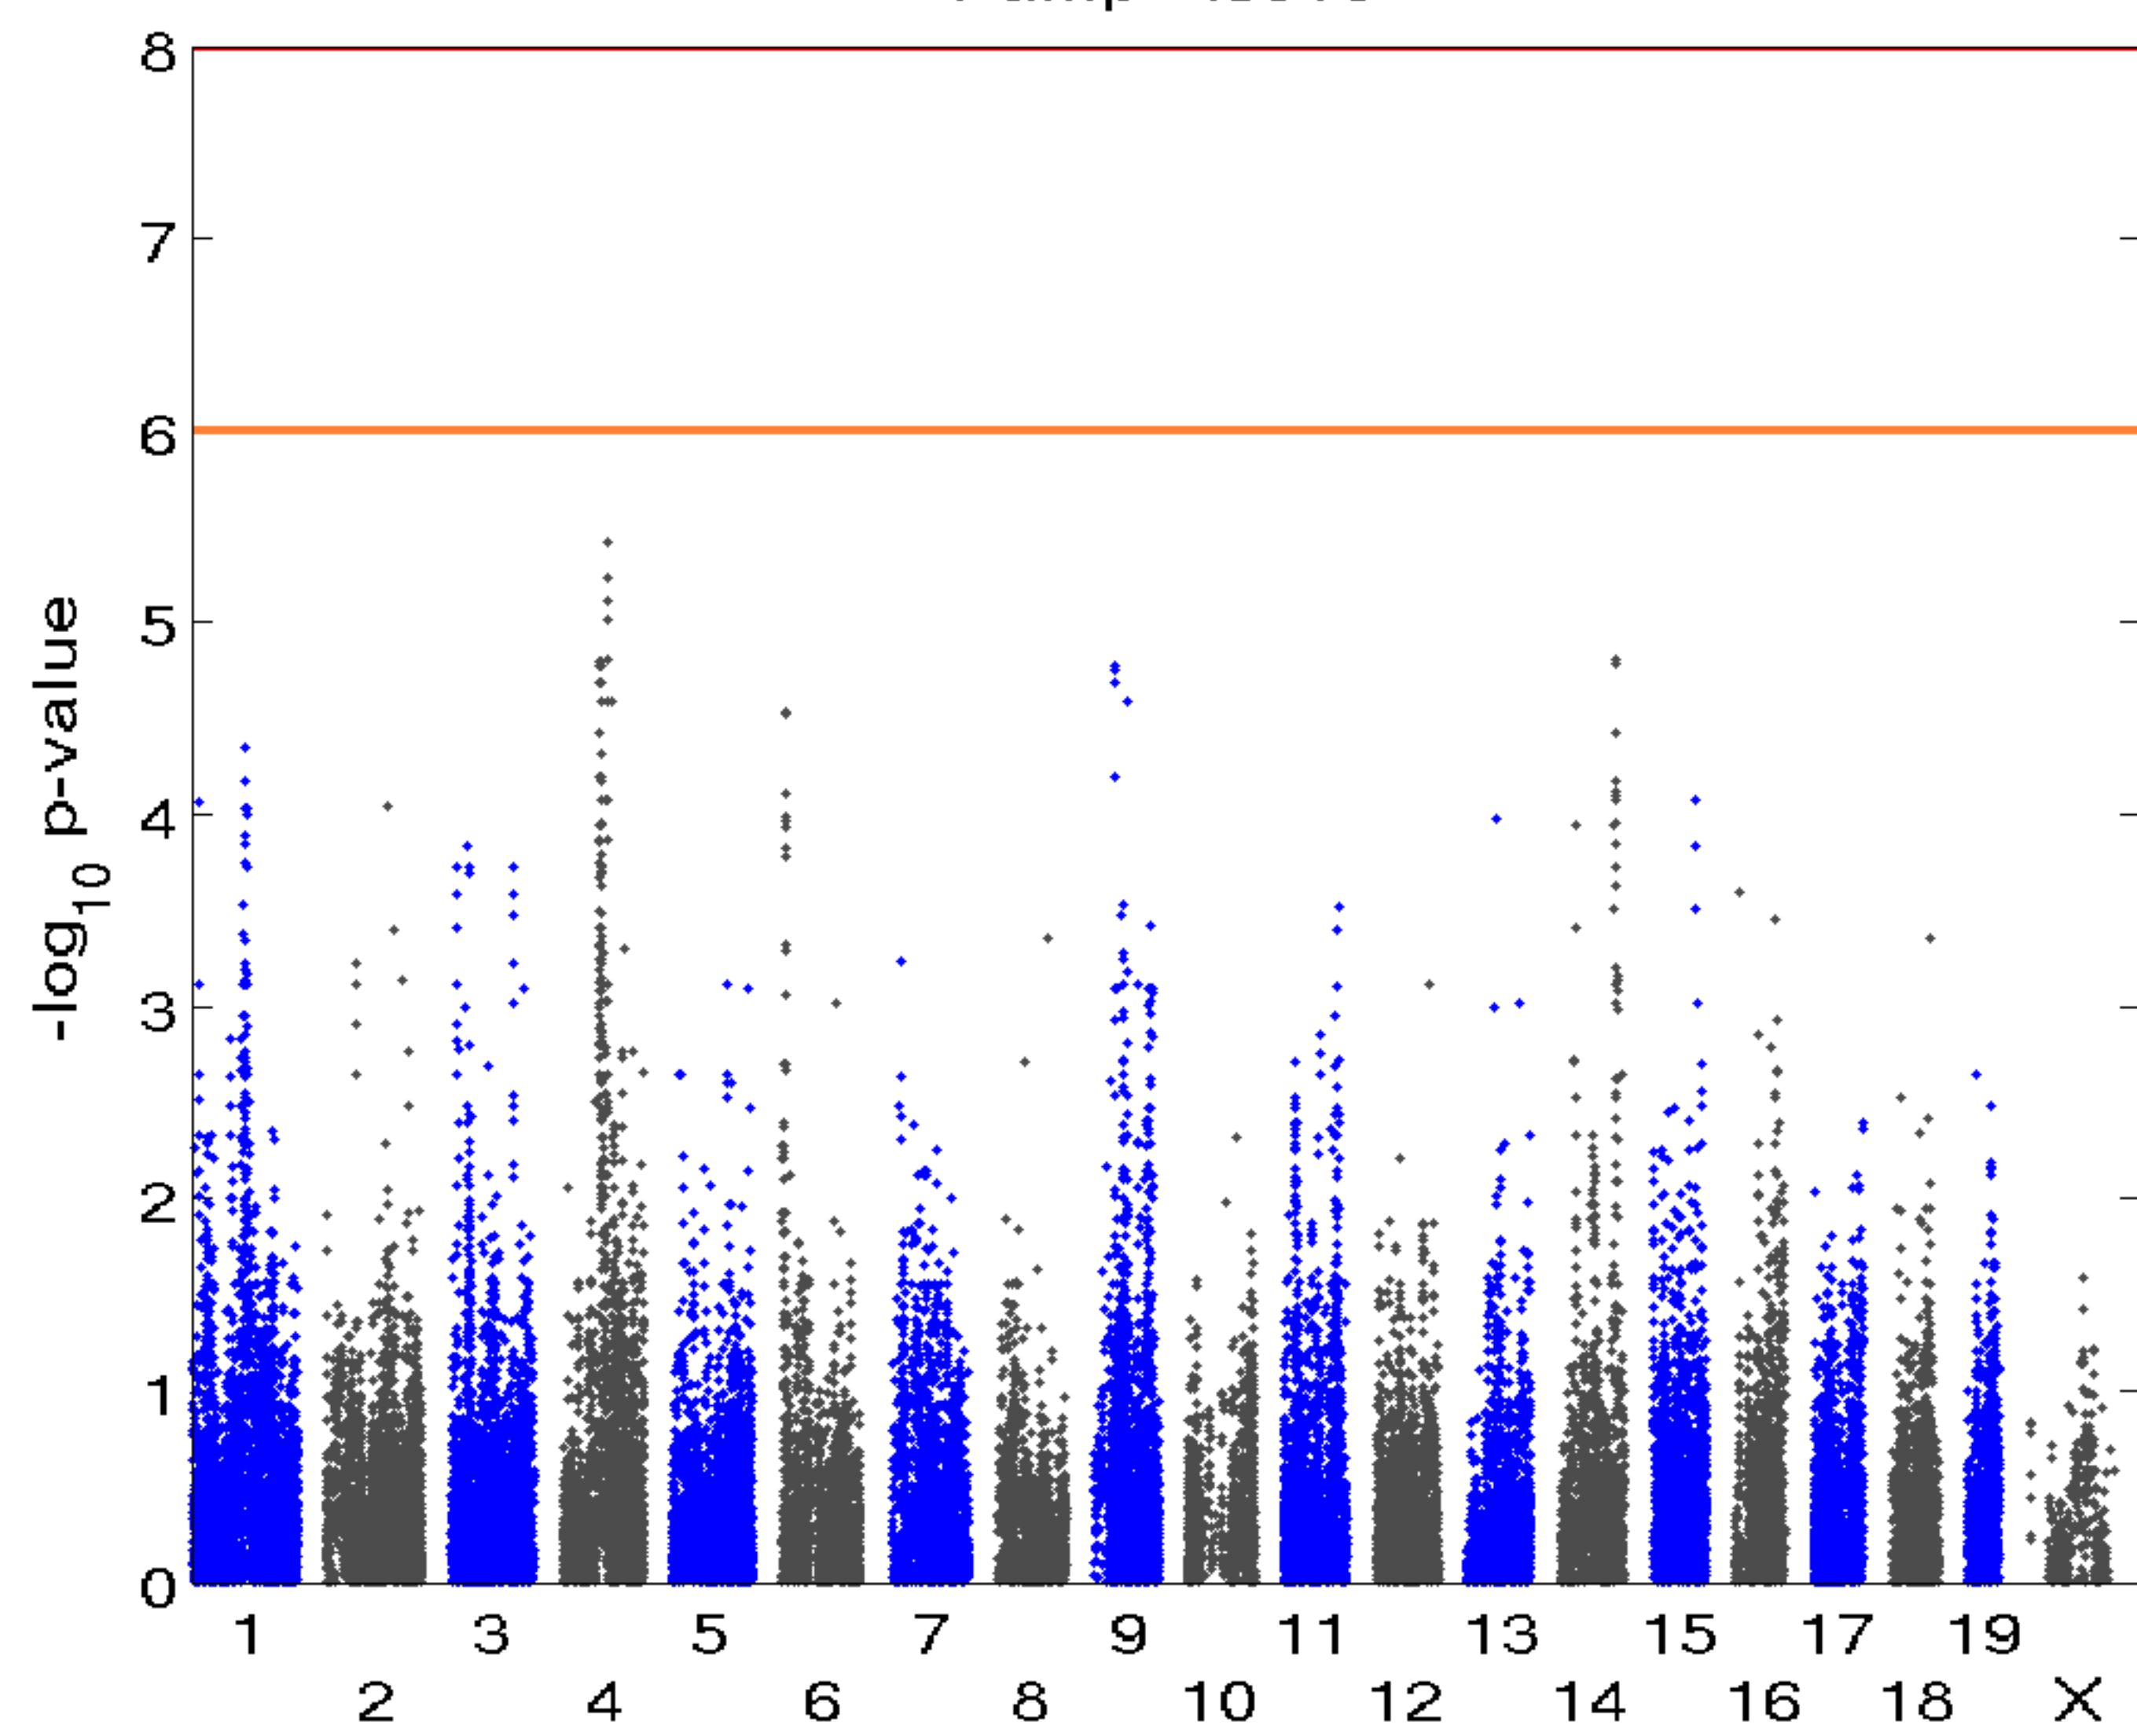

Pamp - iso10

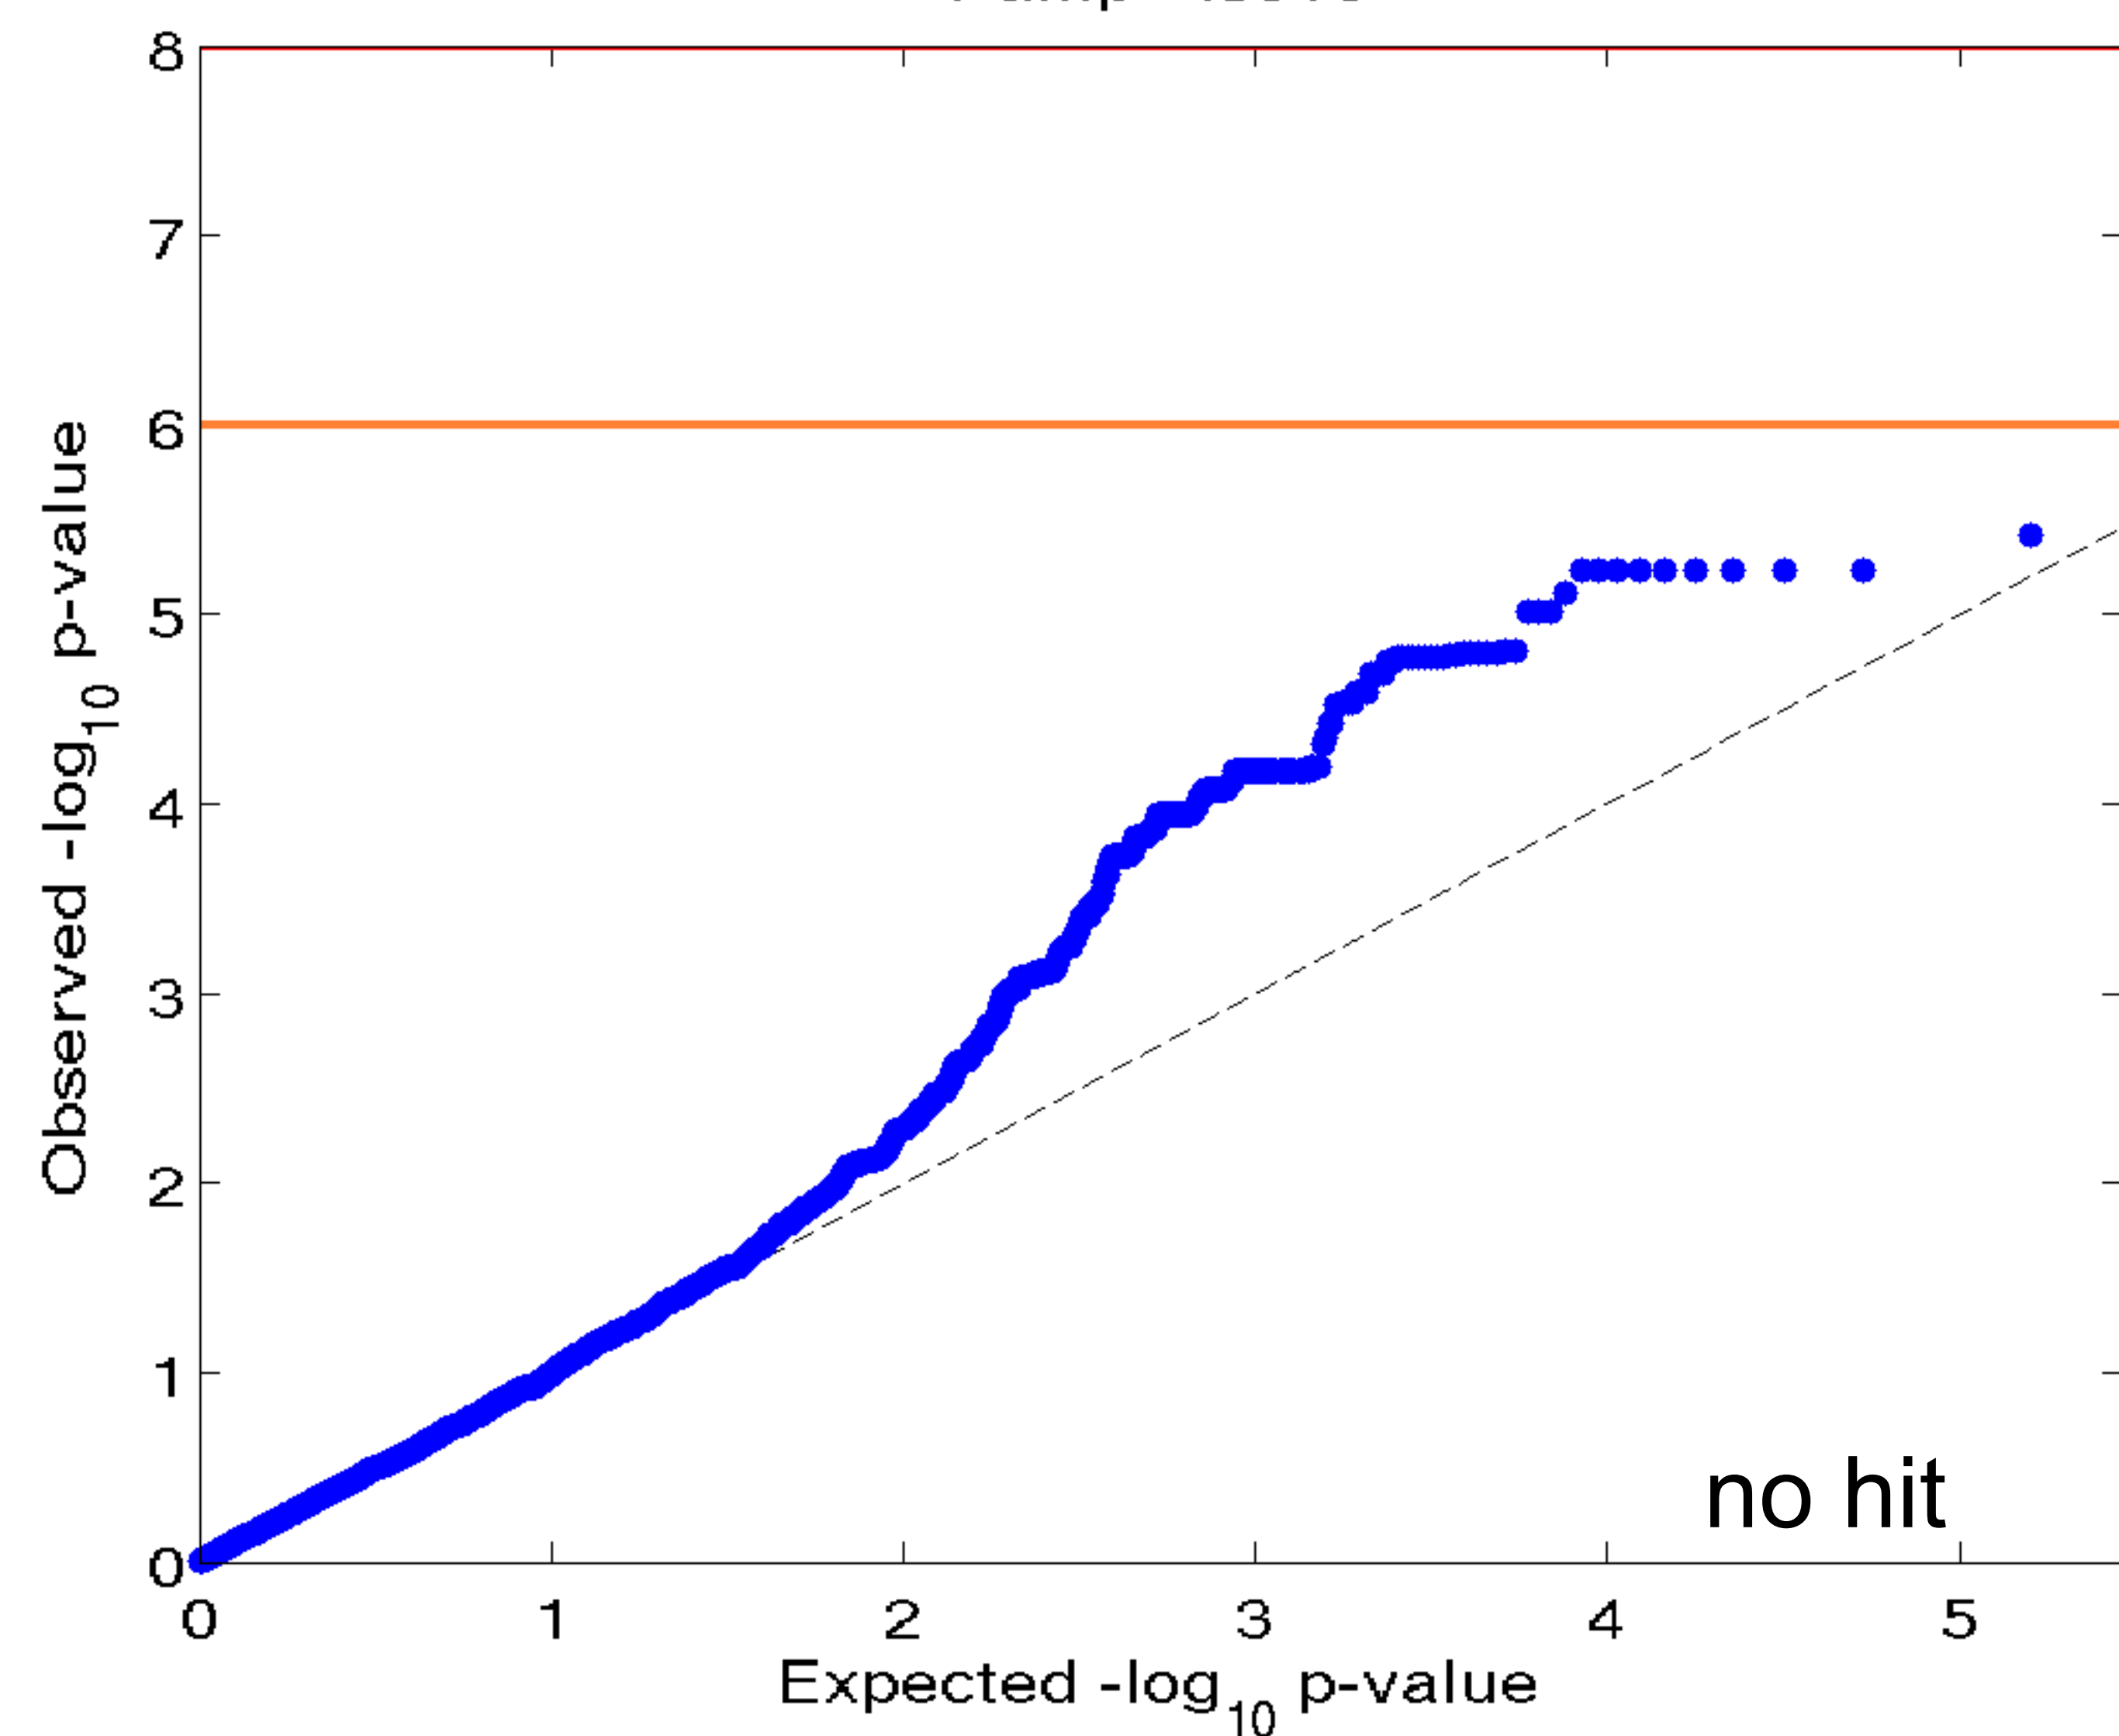

Parea - iso10

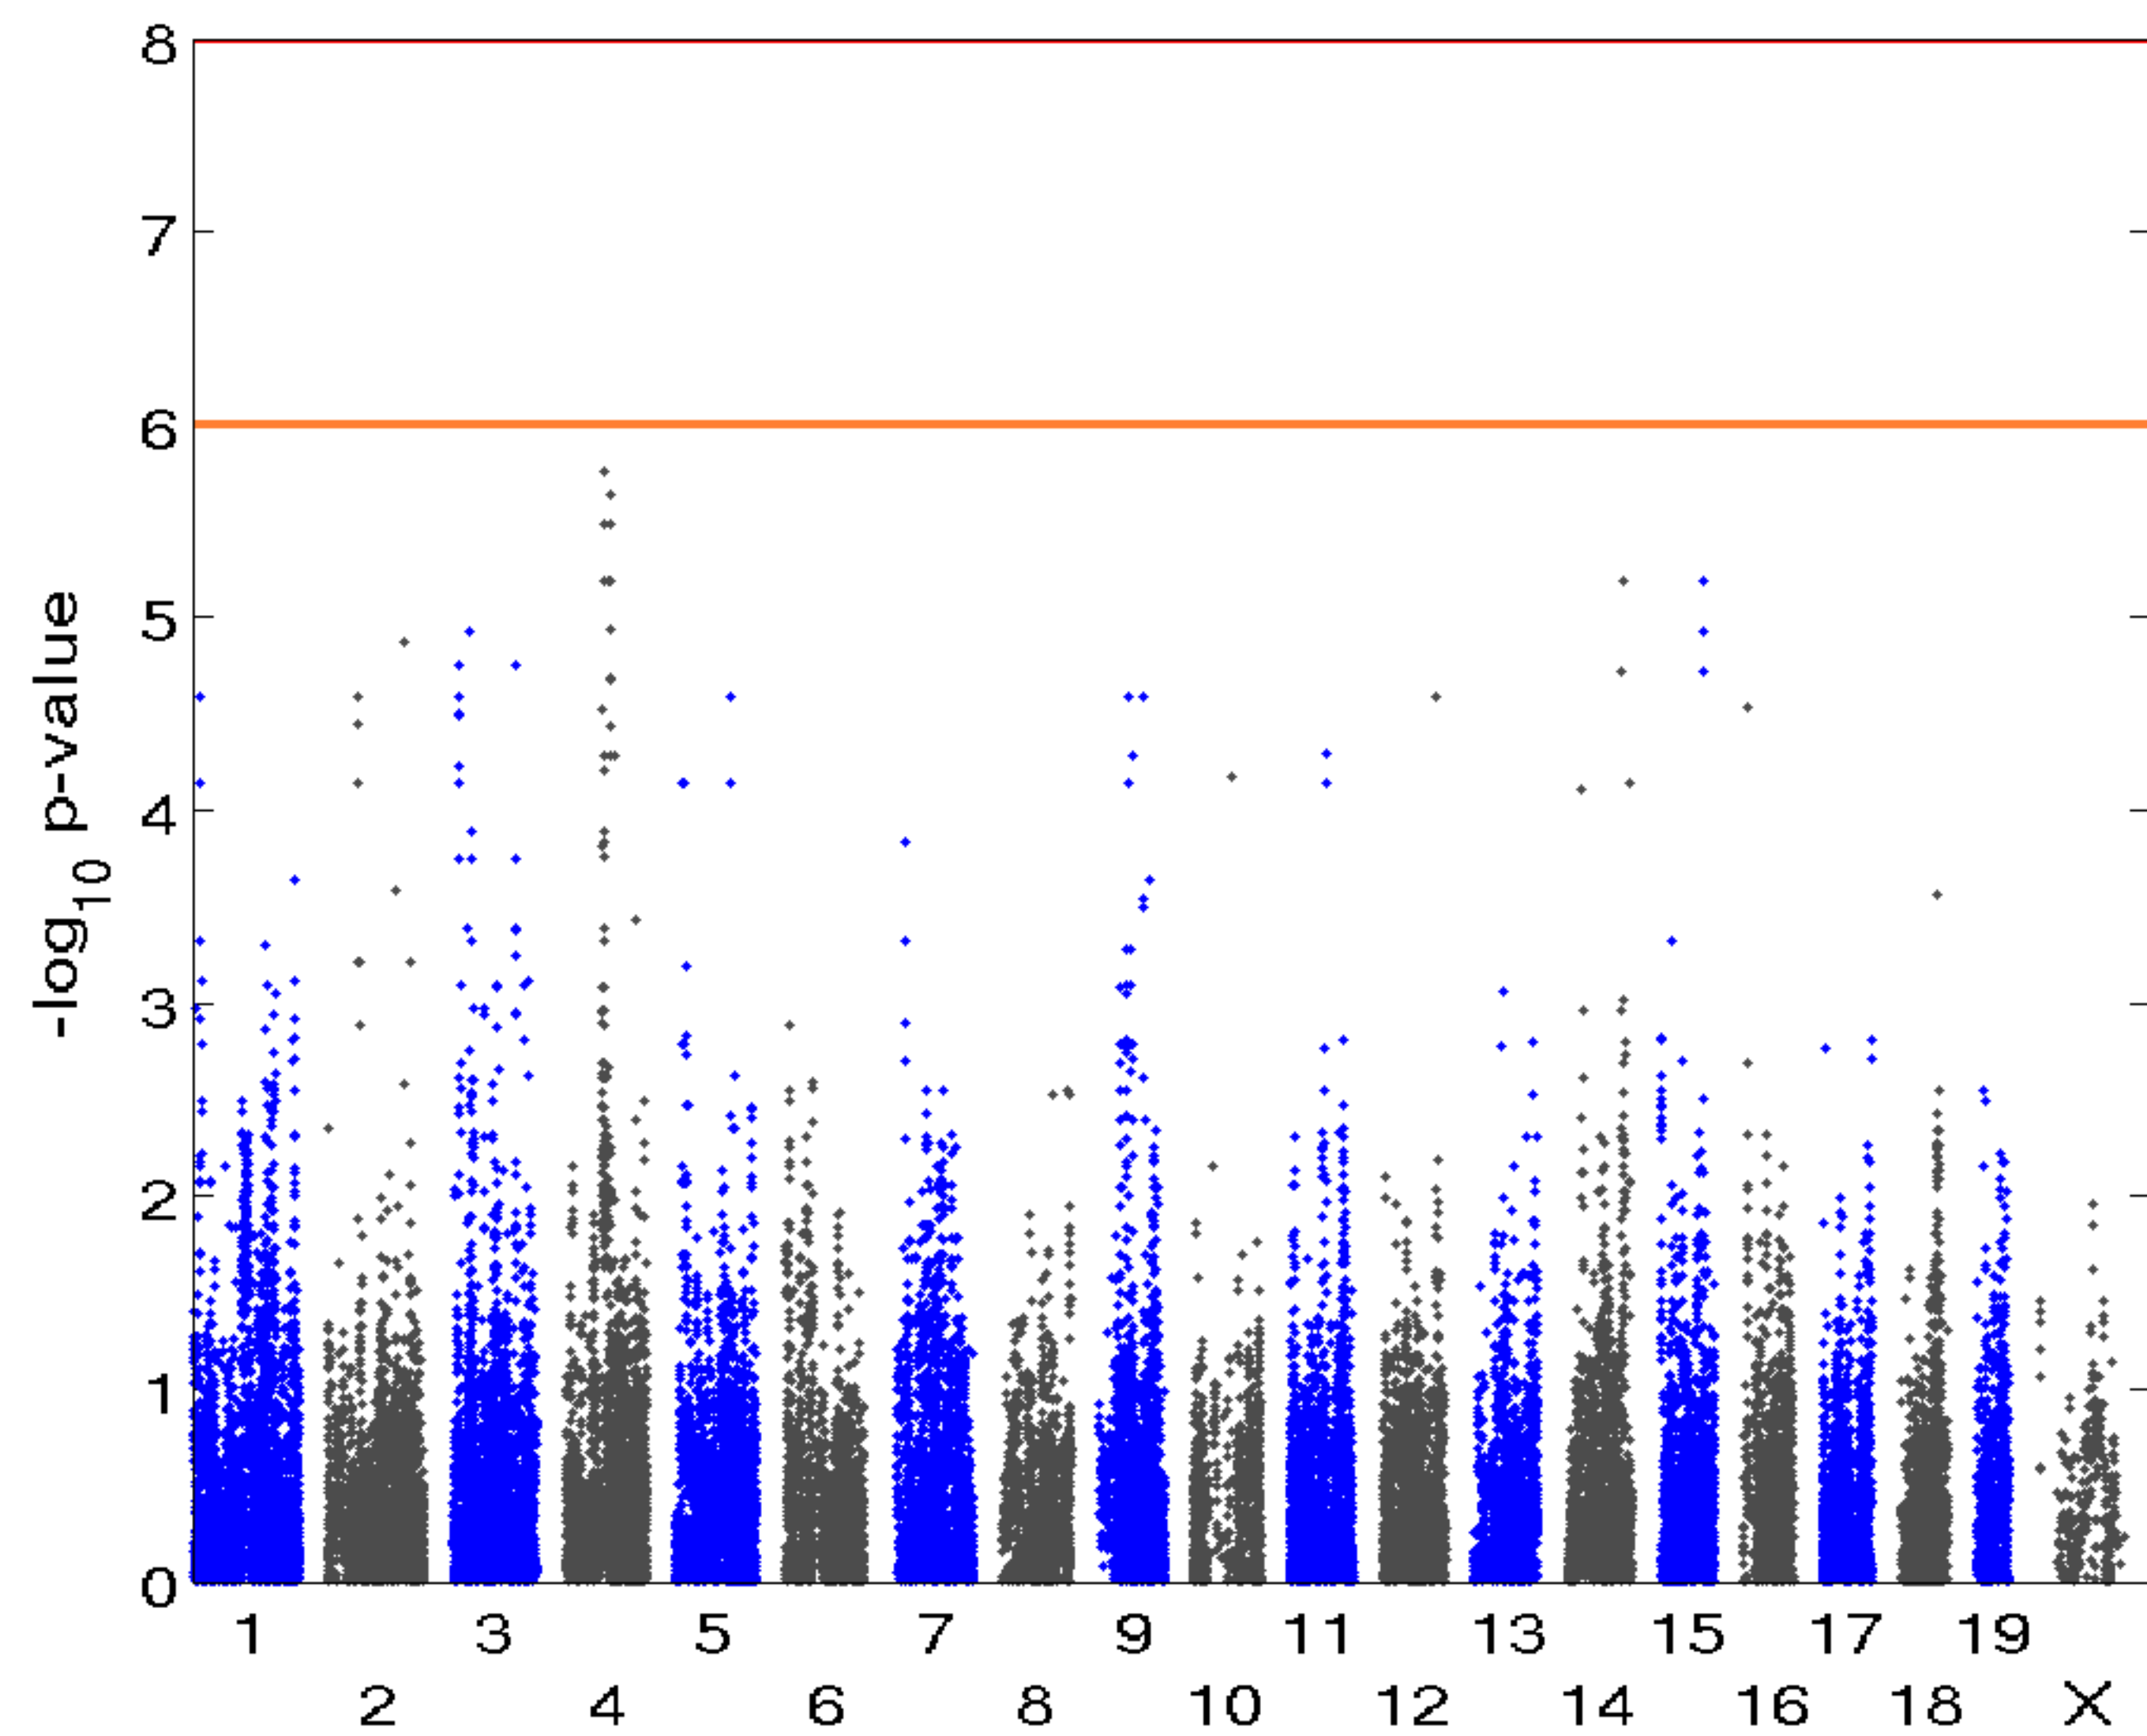

Parea - iso10

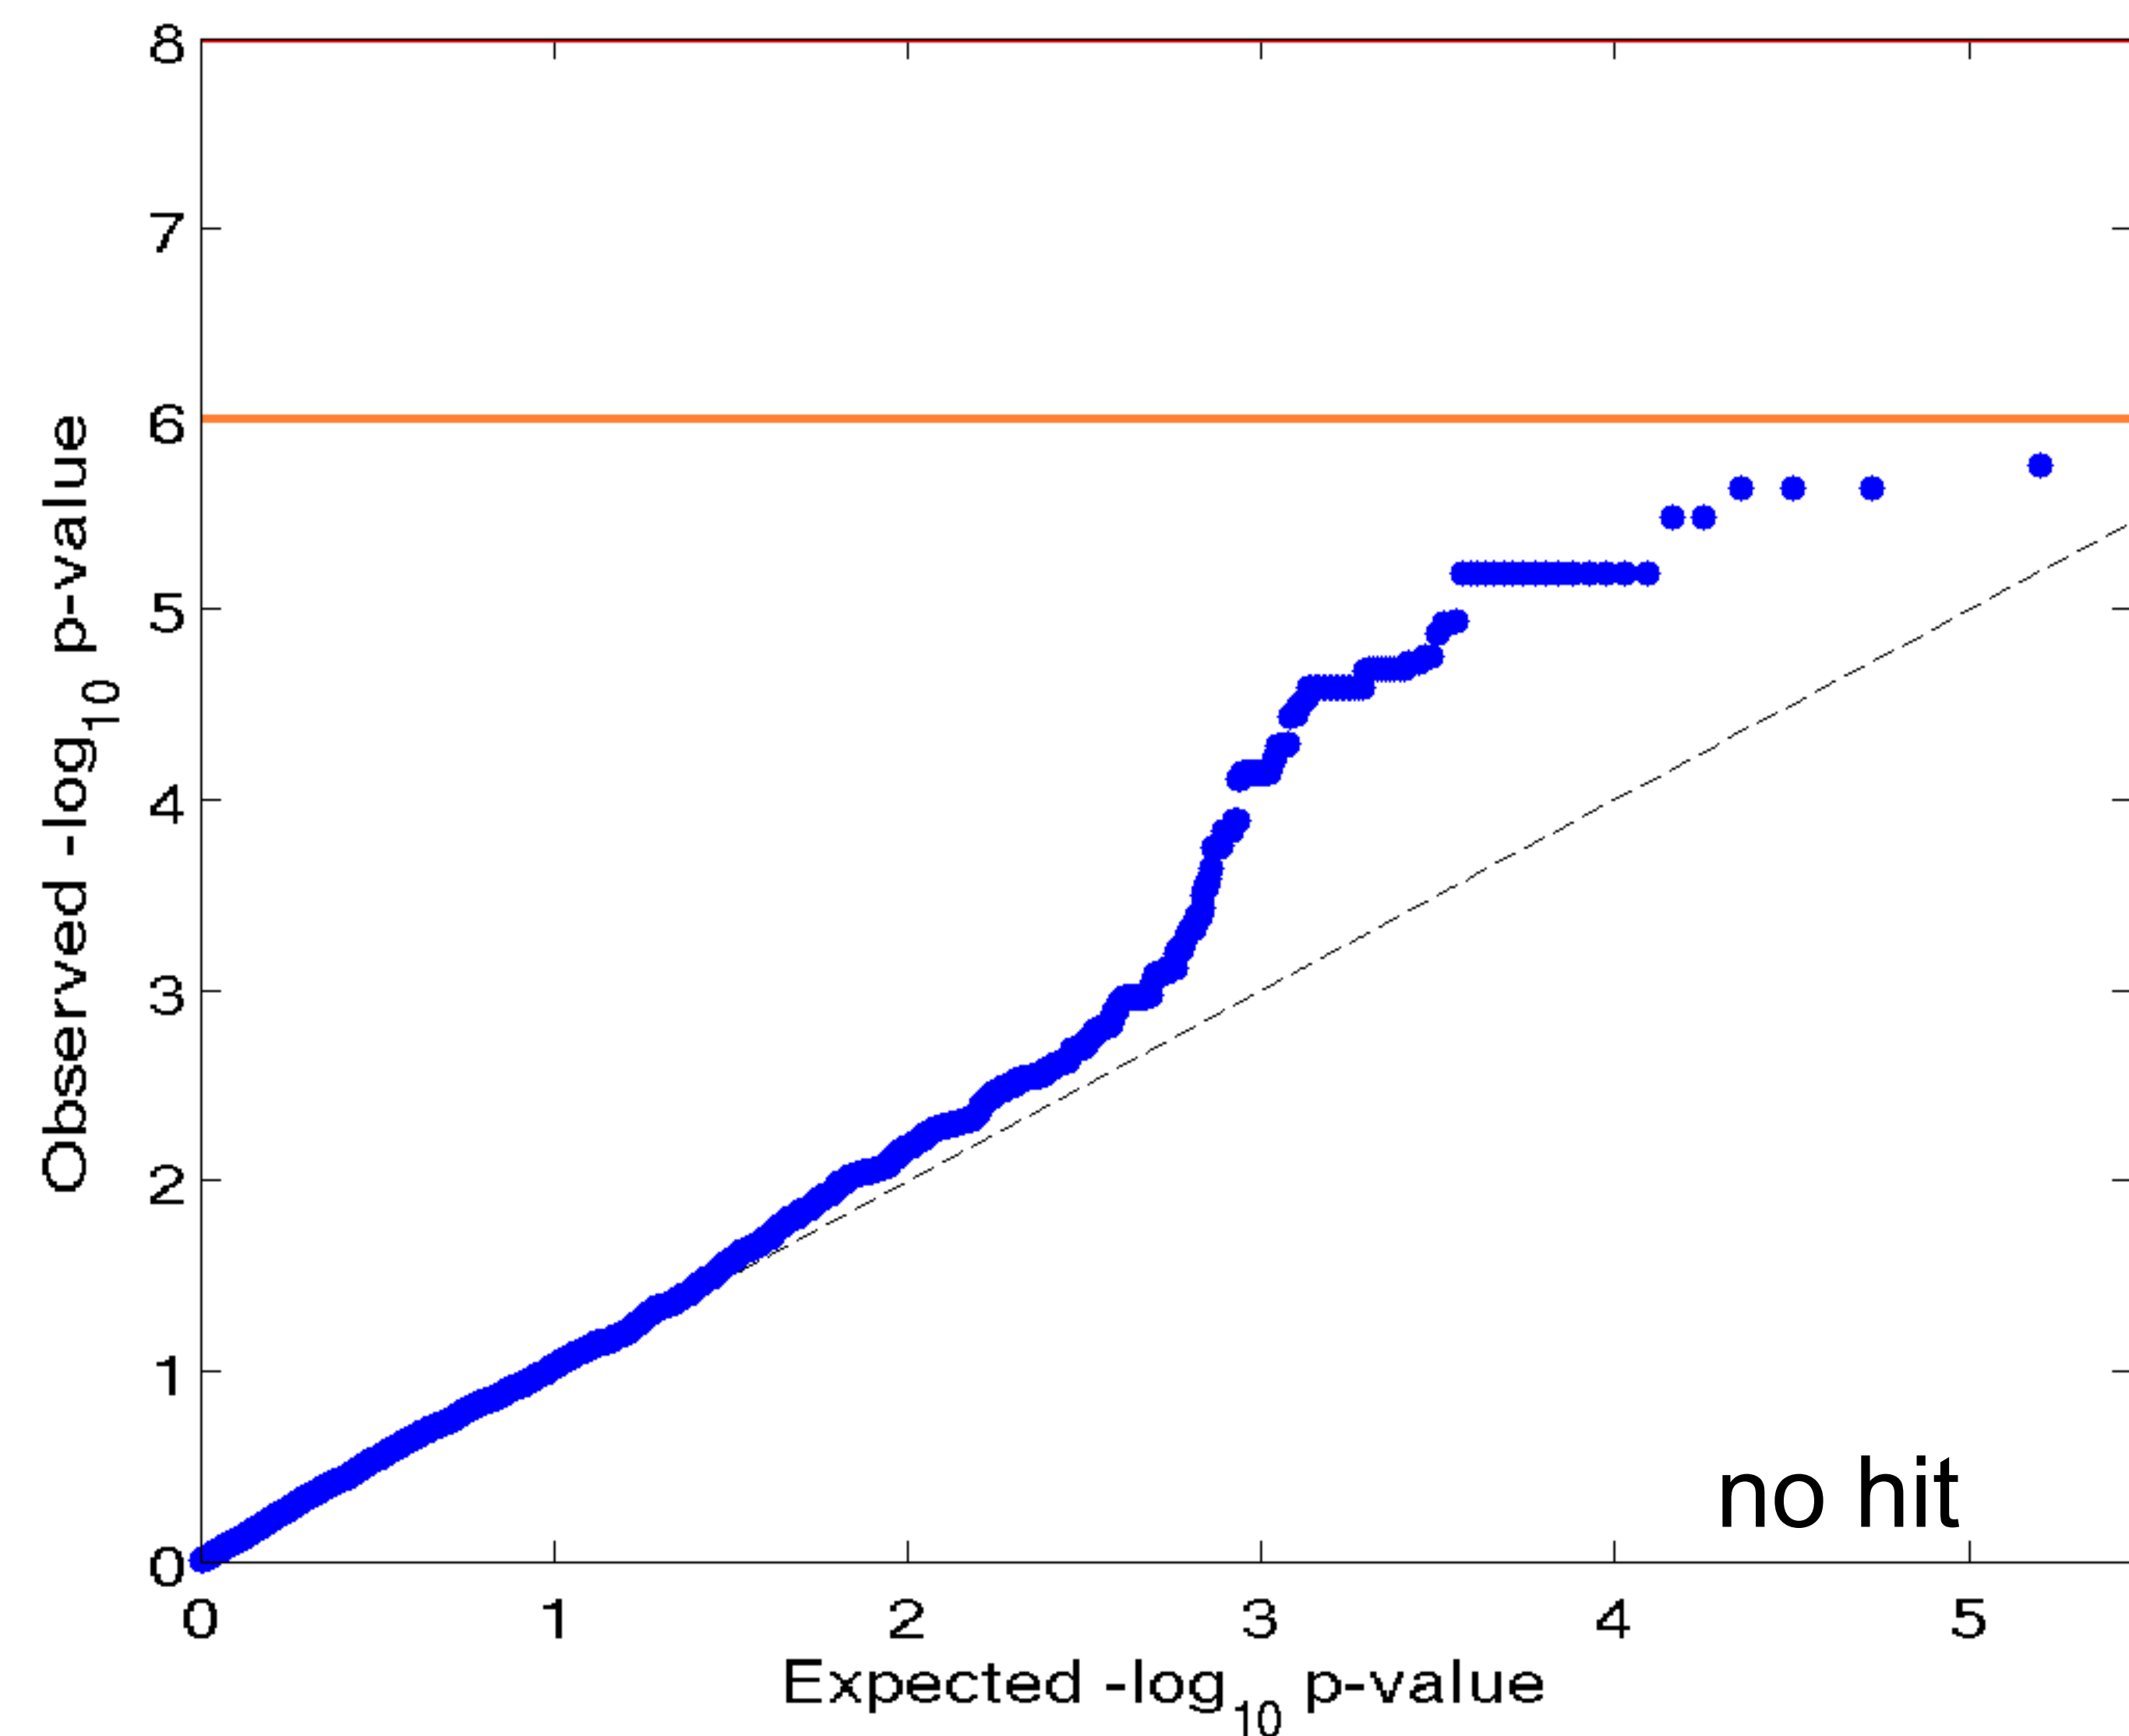

Pdur - iso10

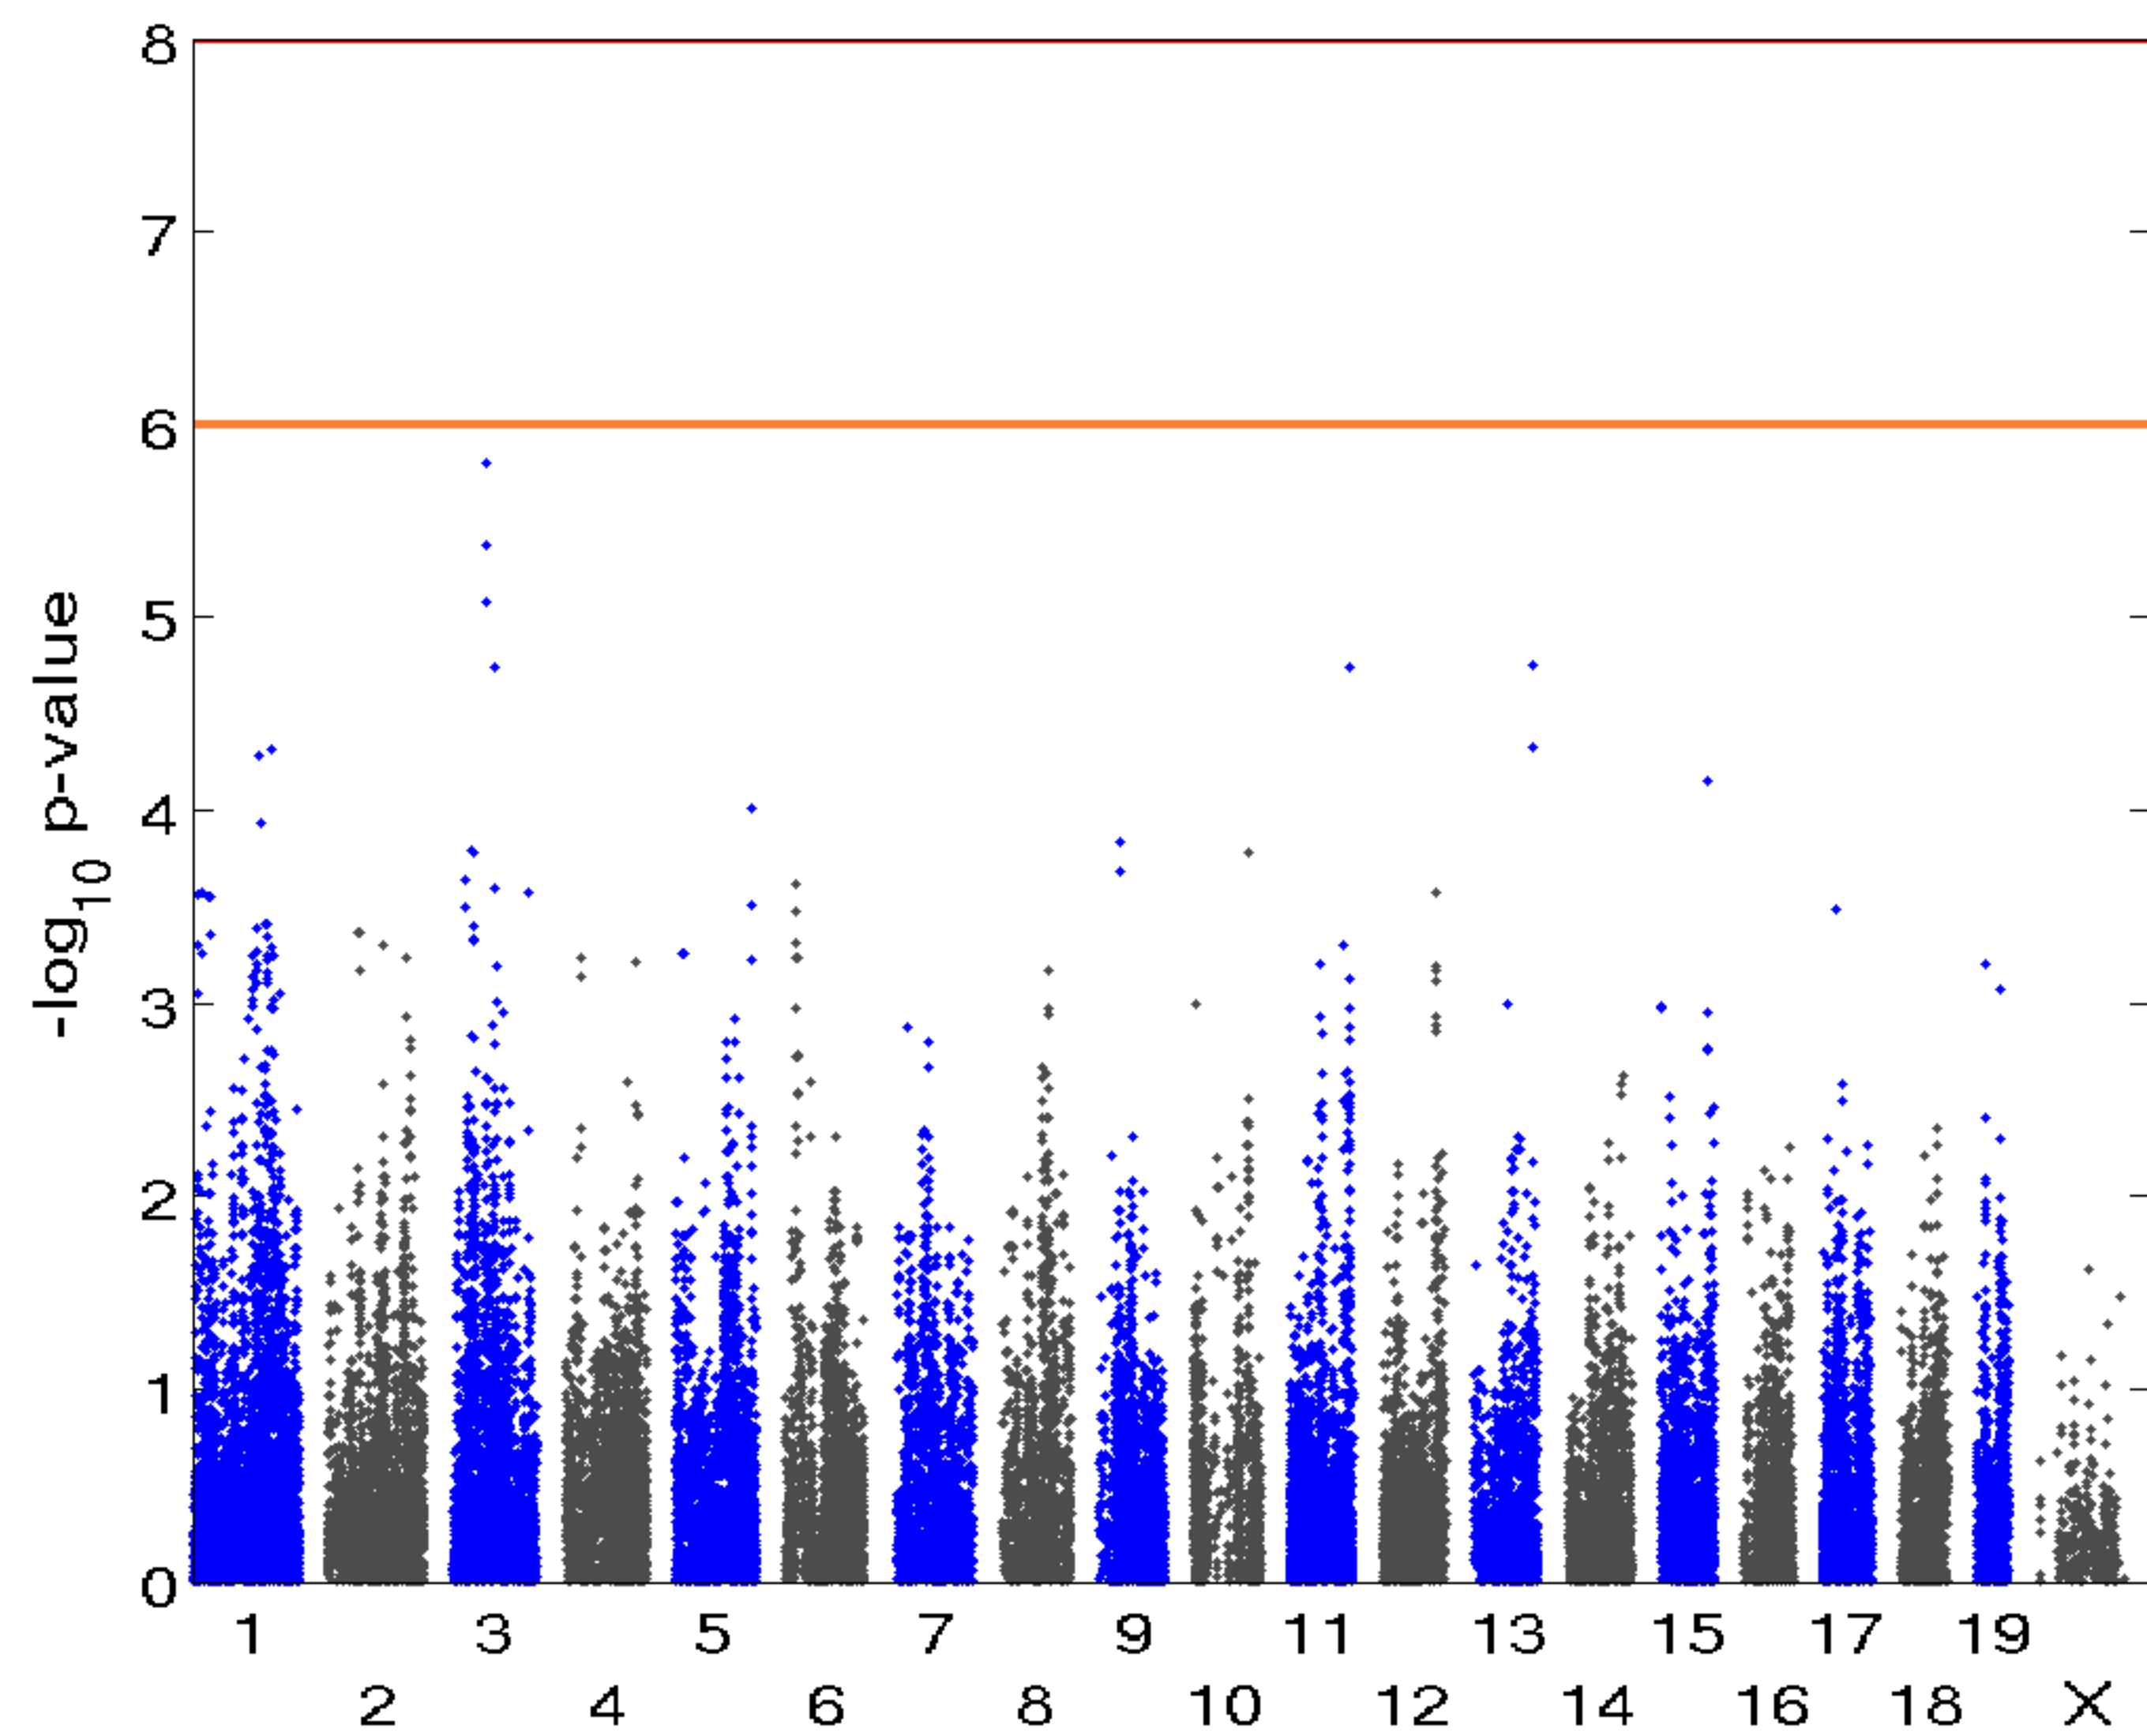

Pdur - iso10

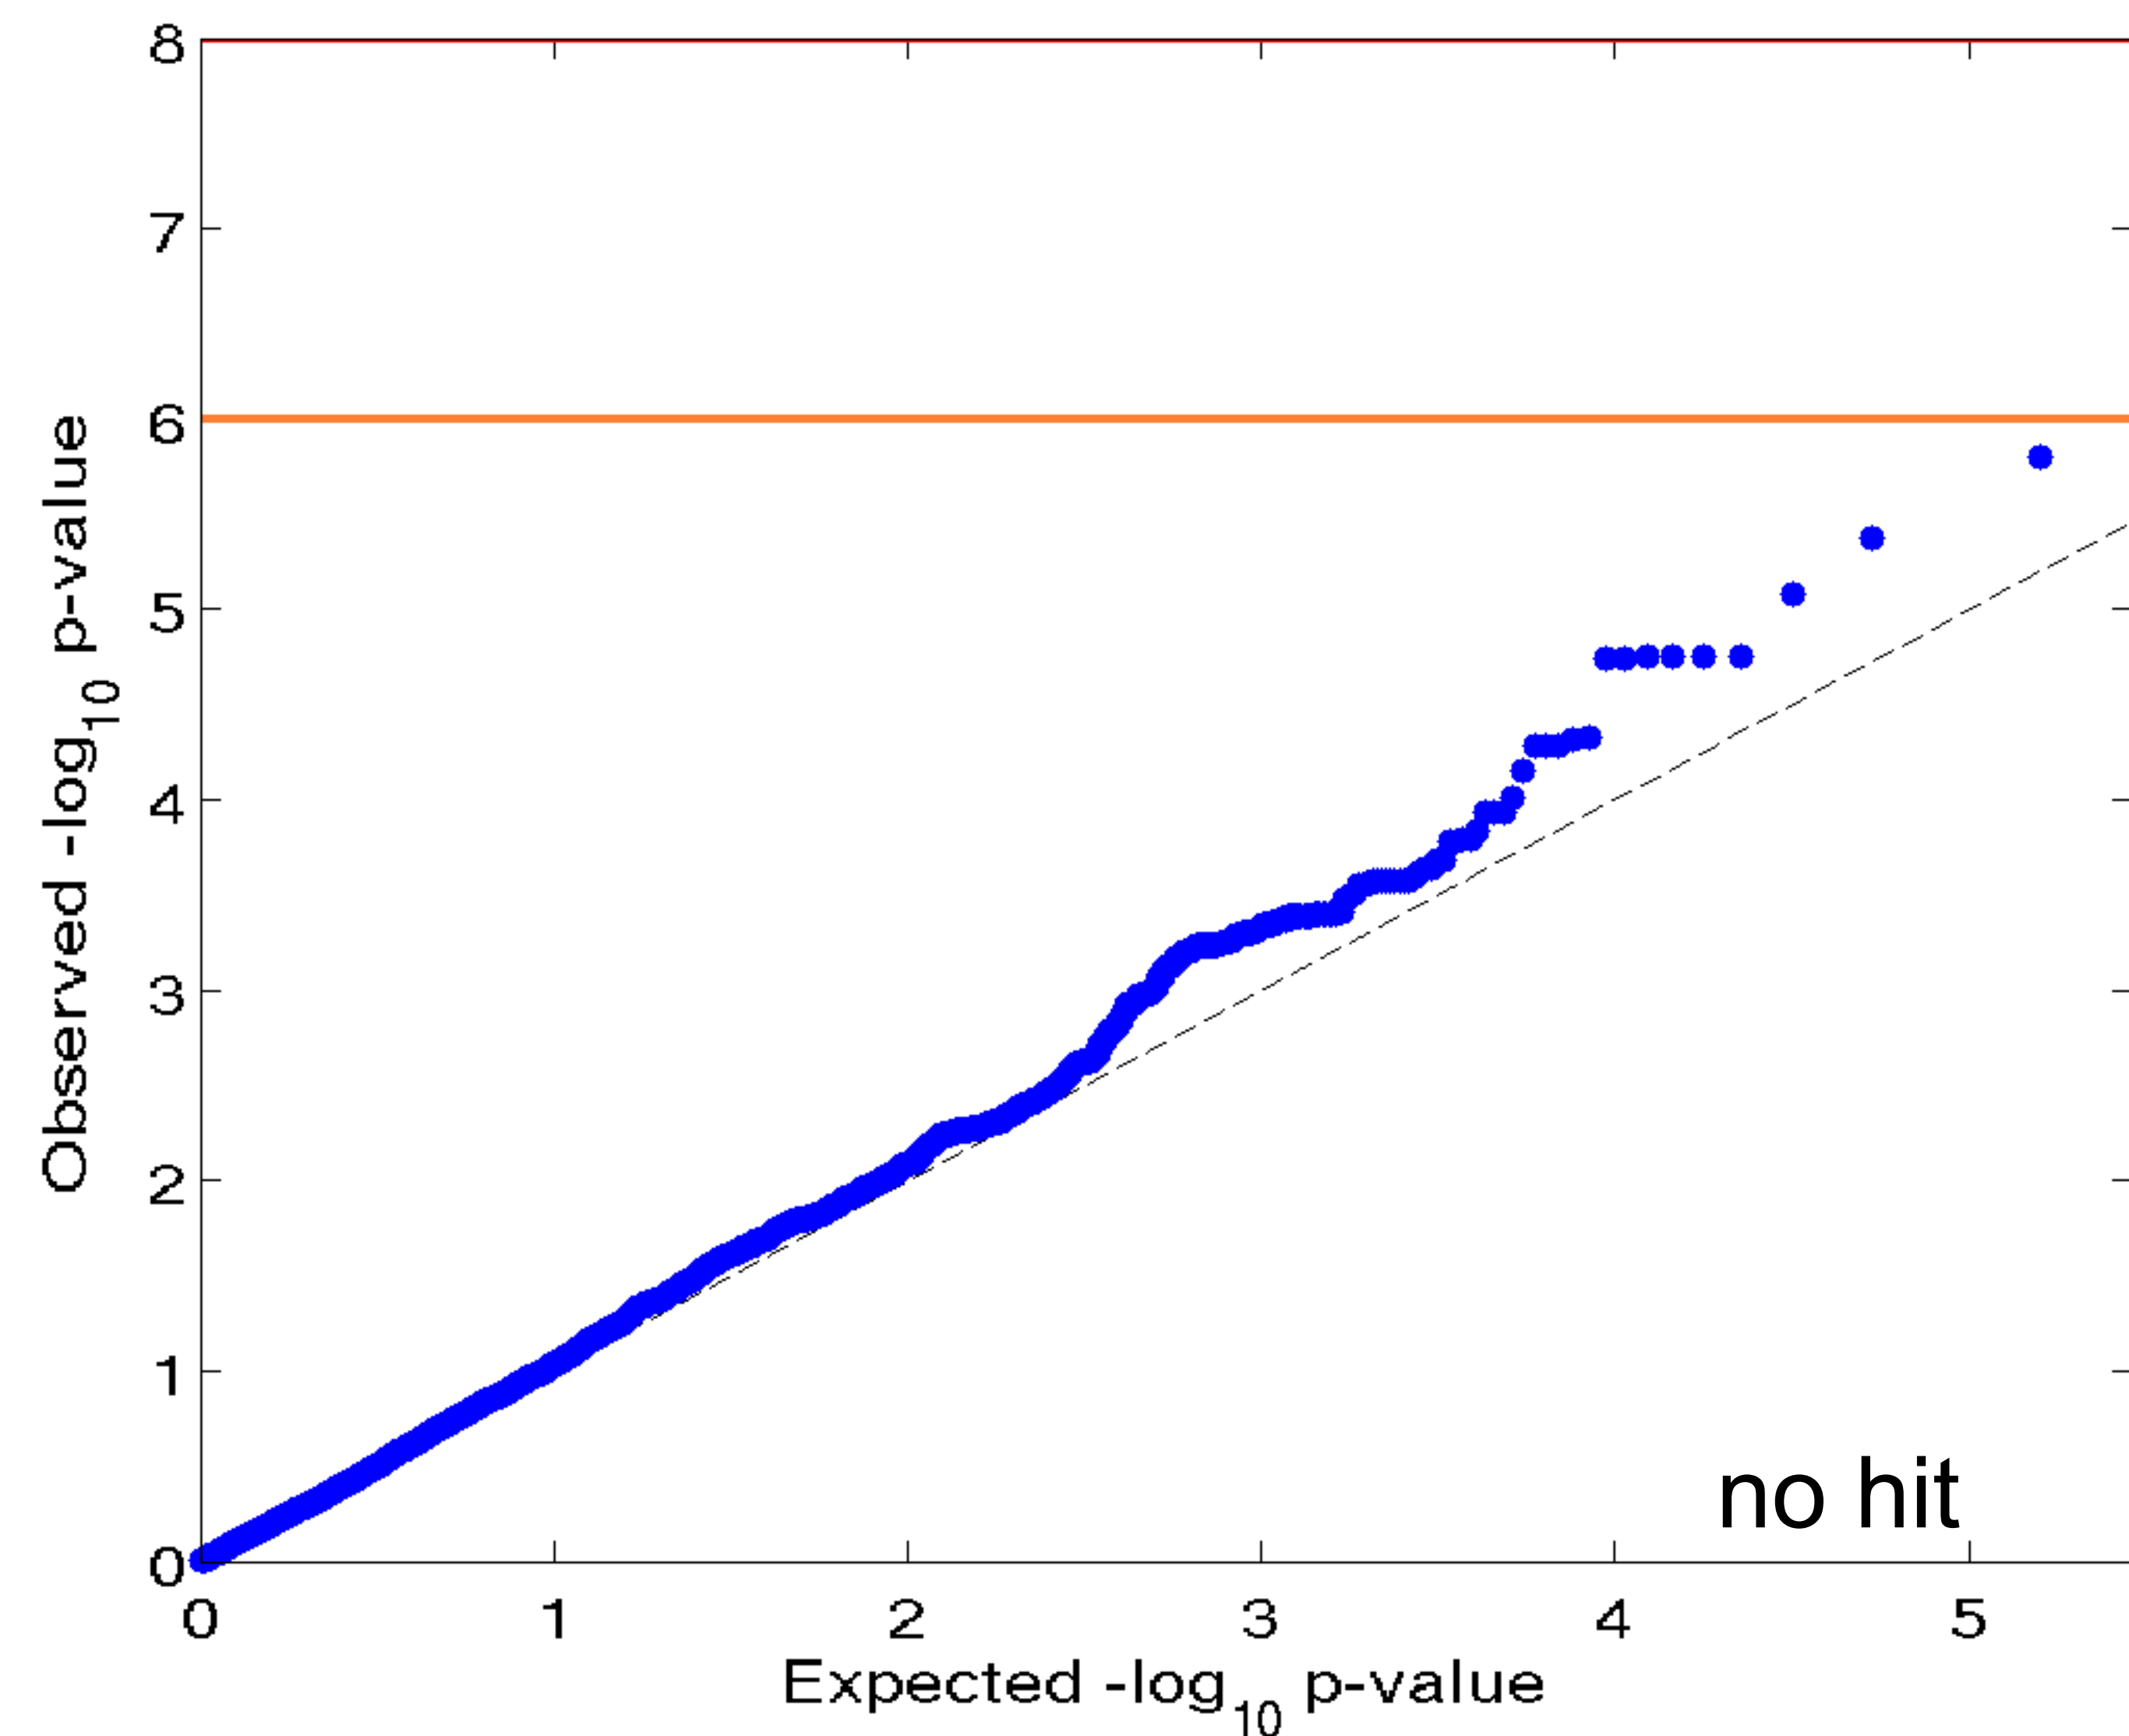

PR - iso10

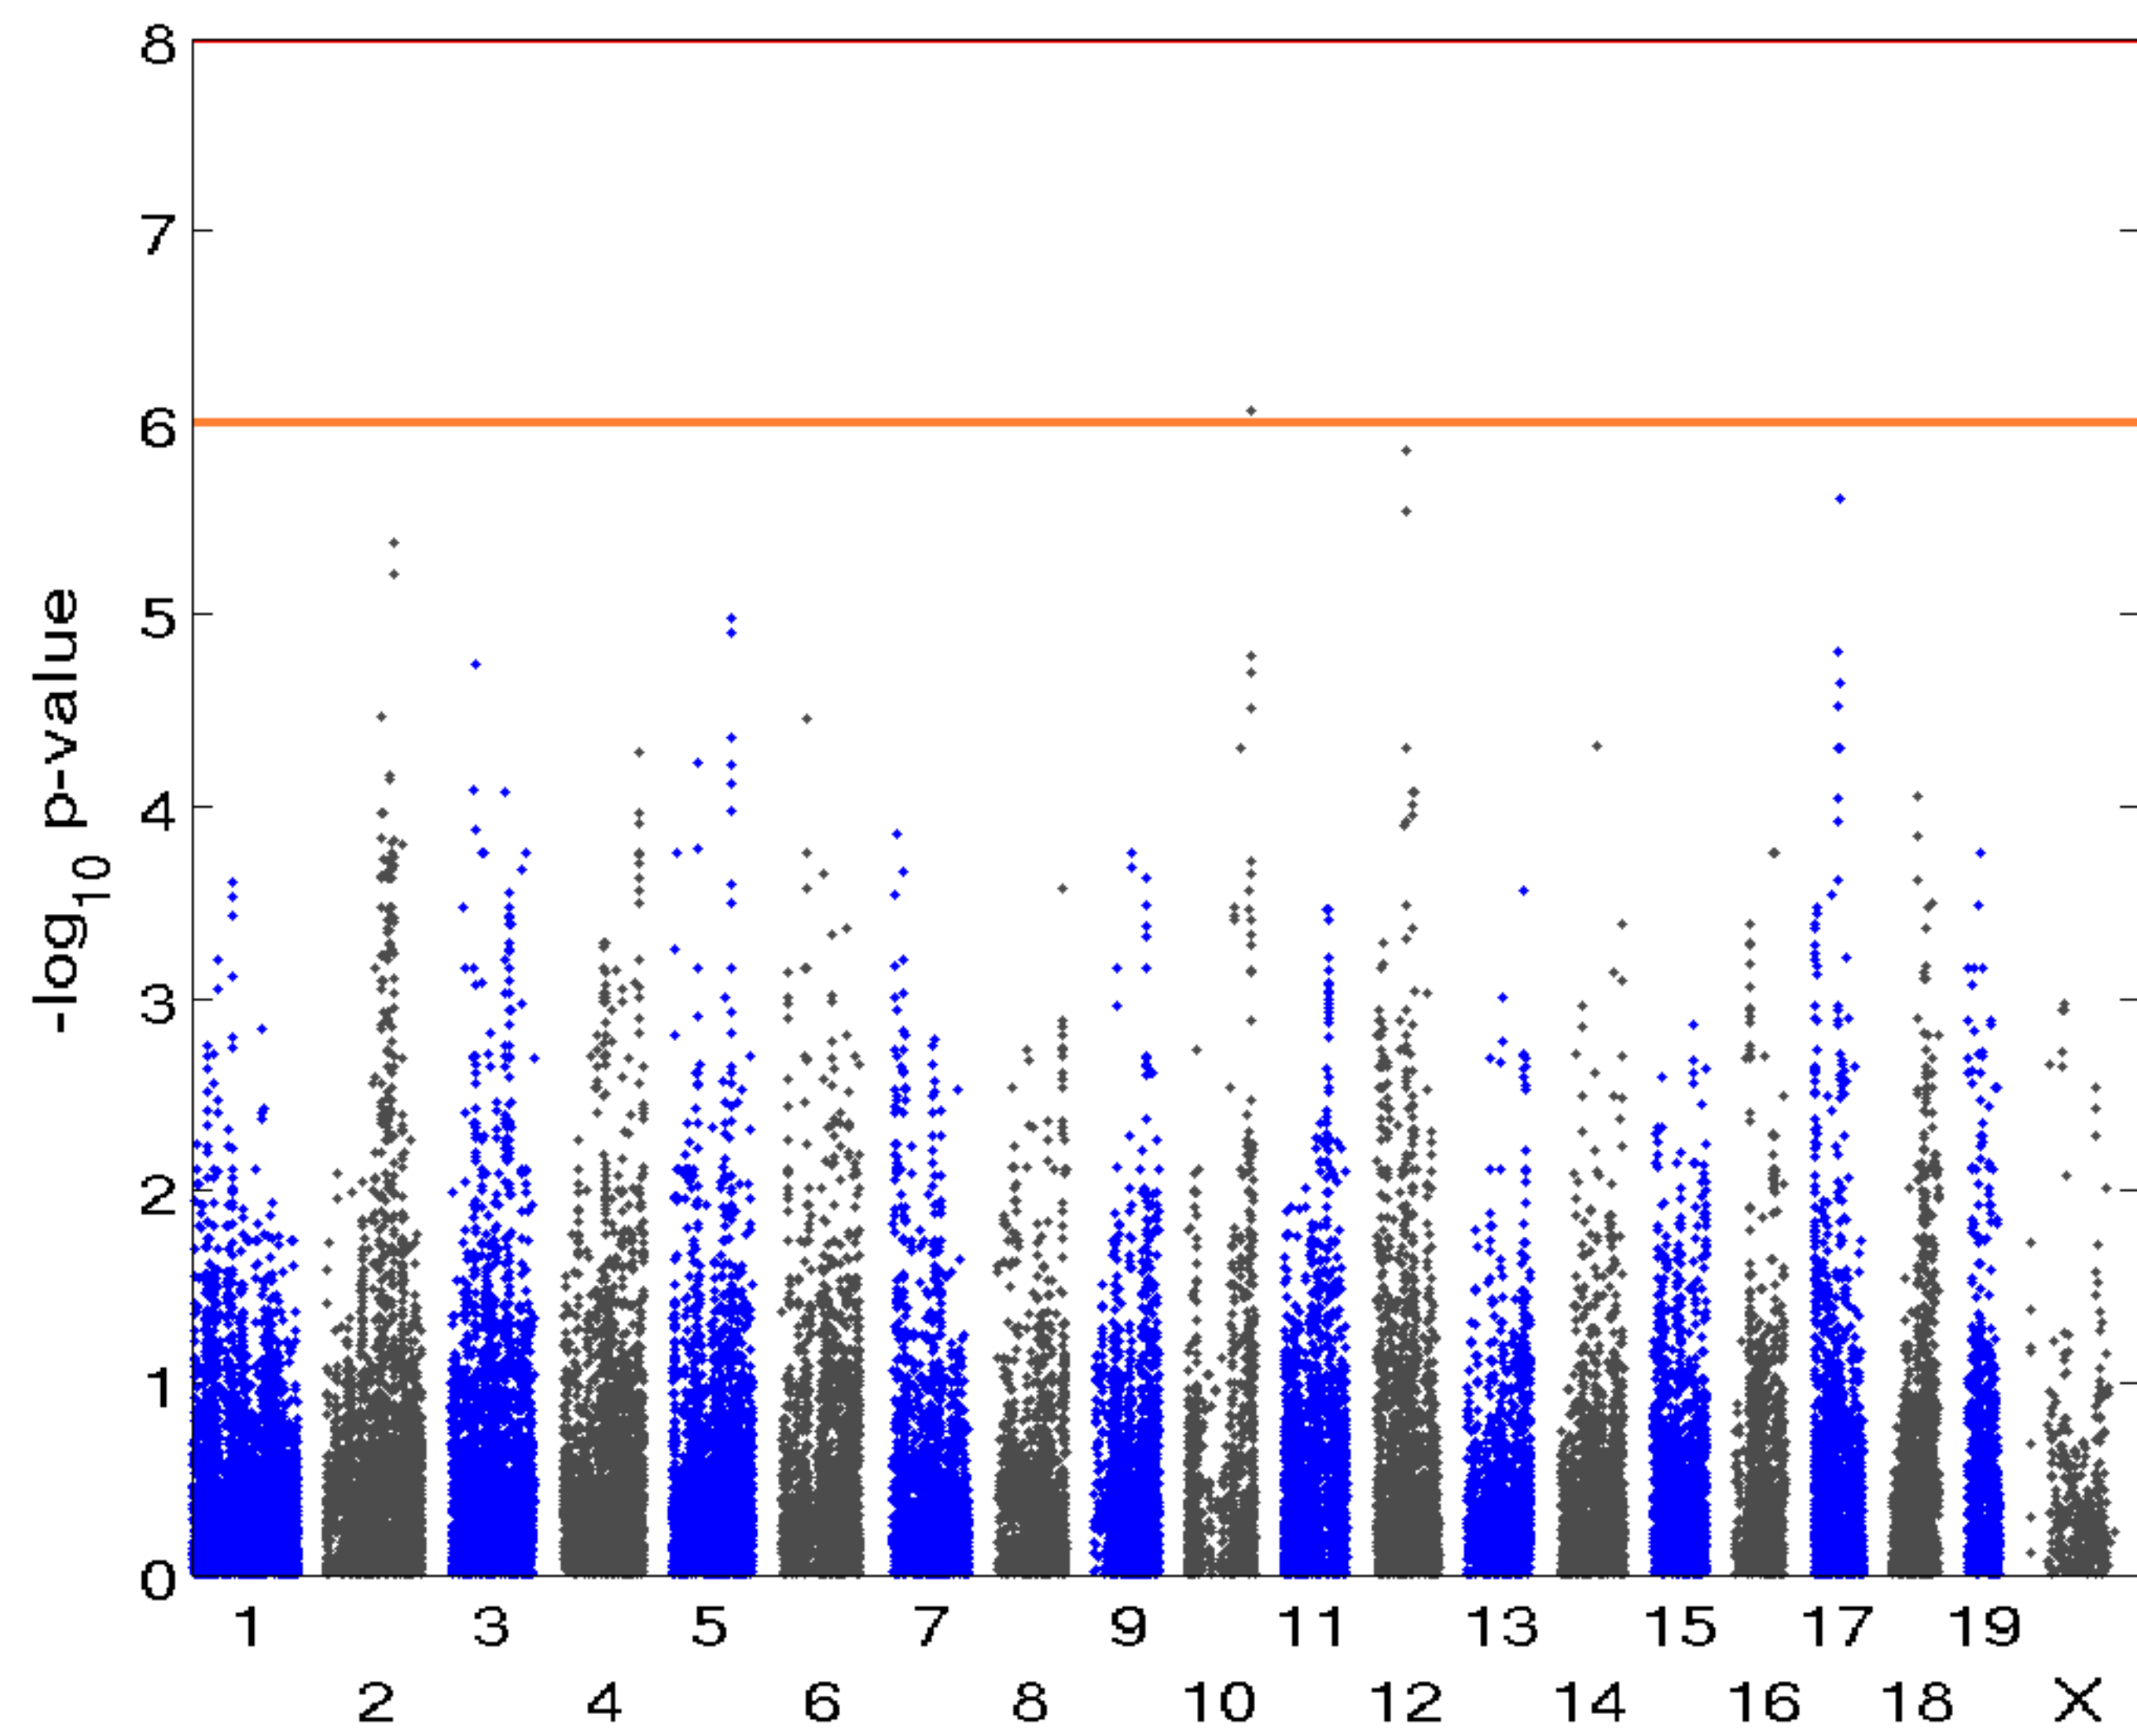

PR - iso10

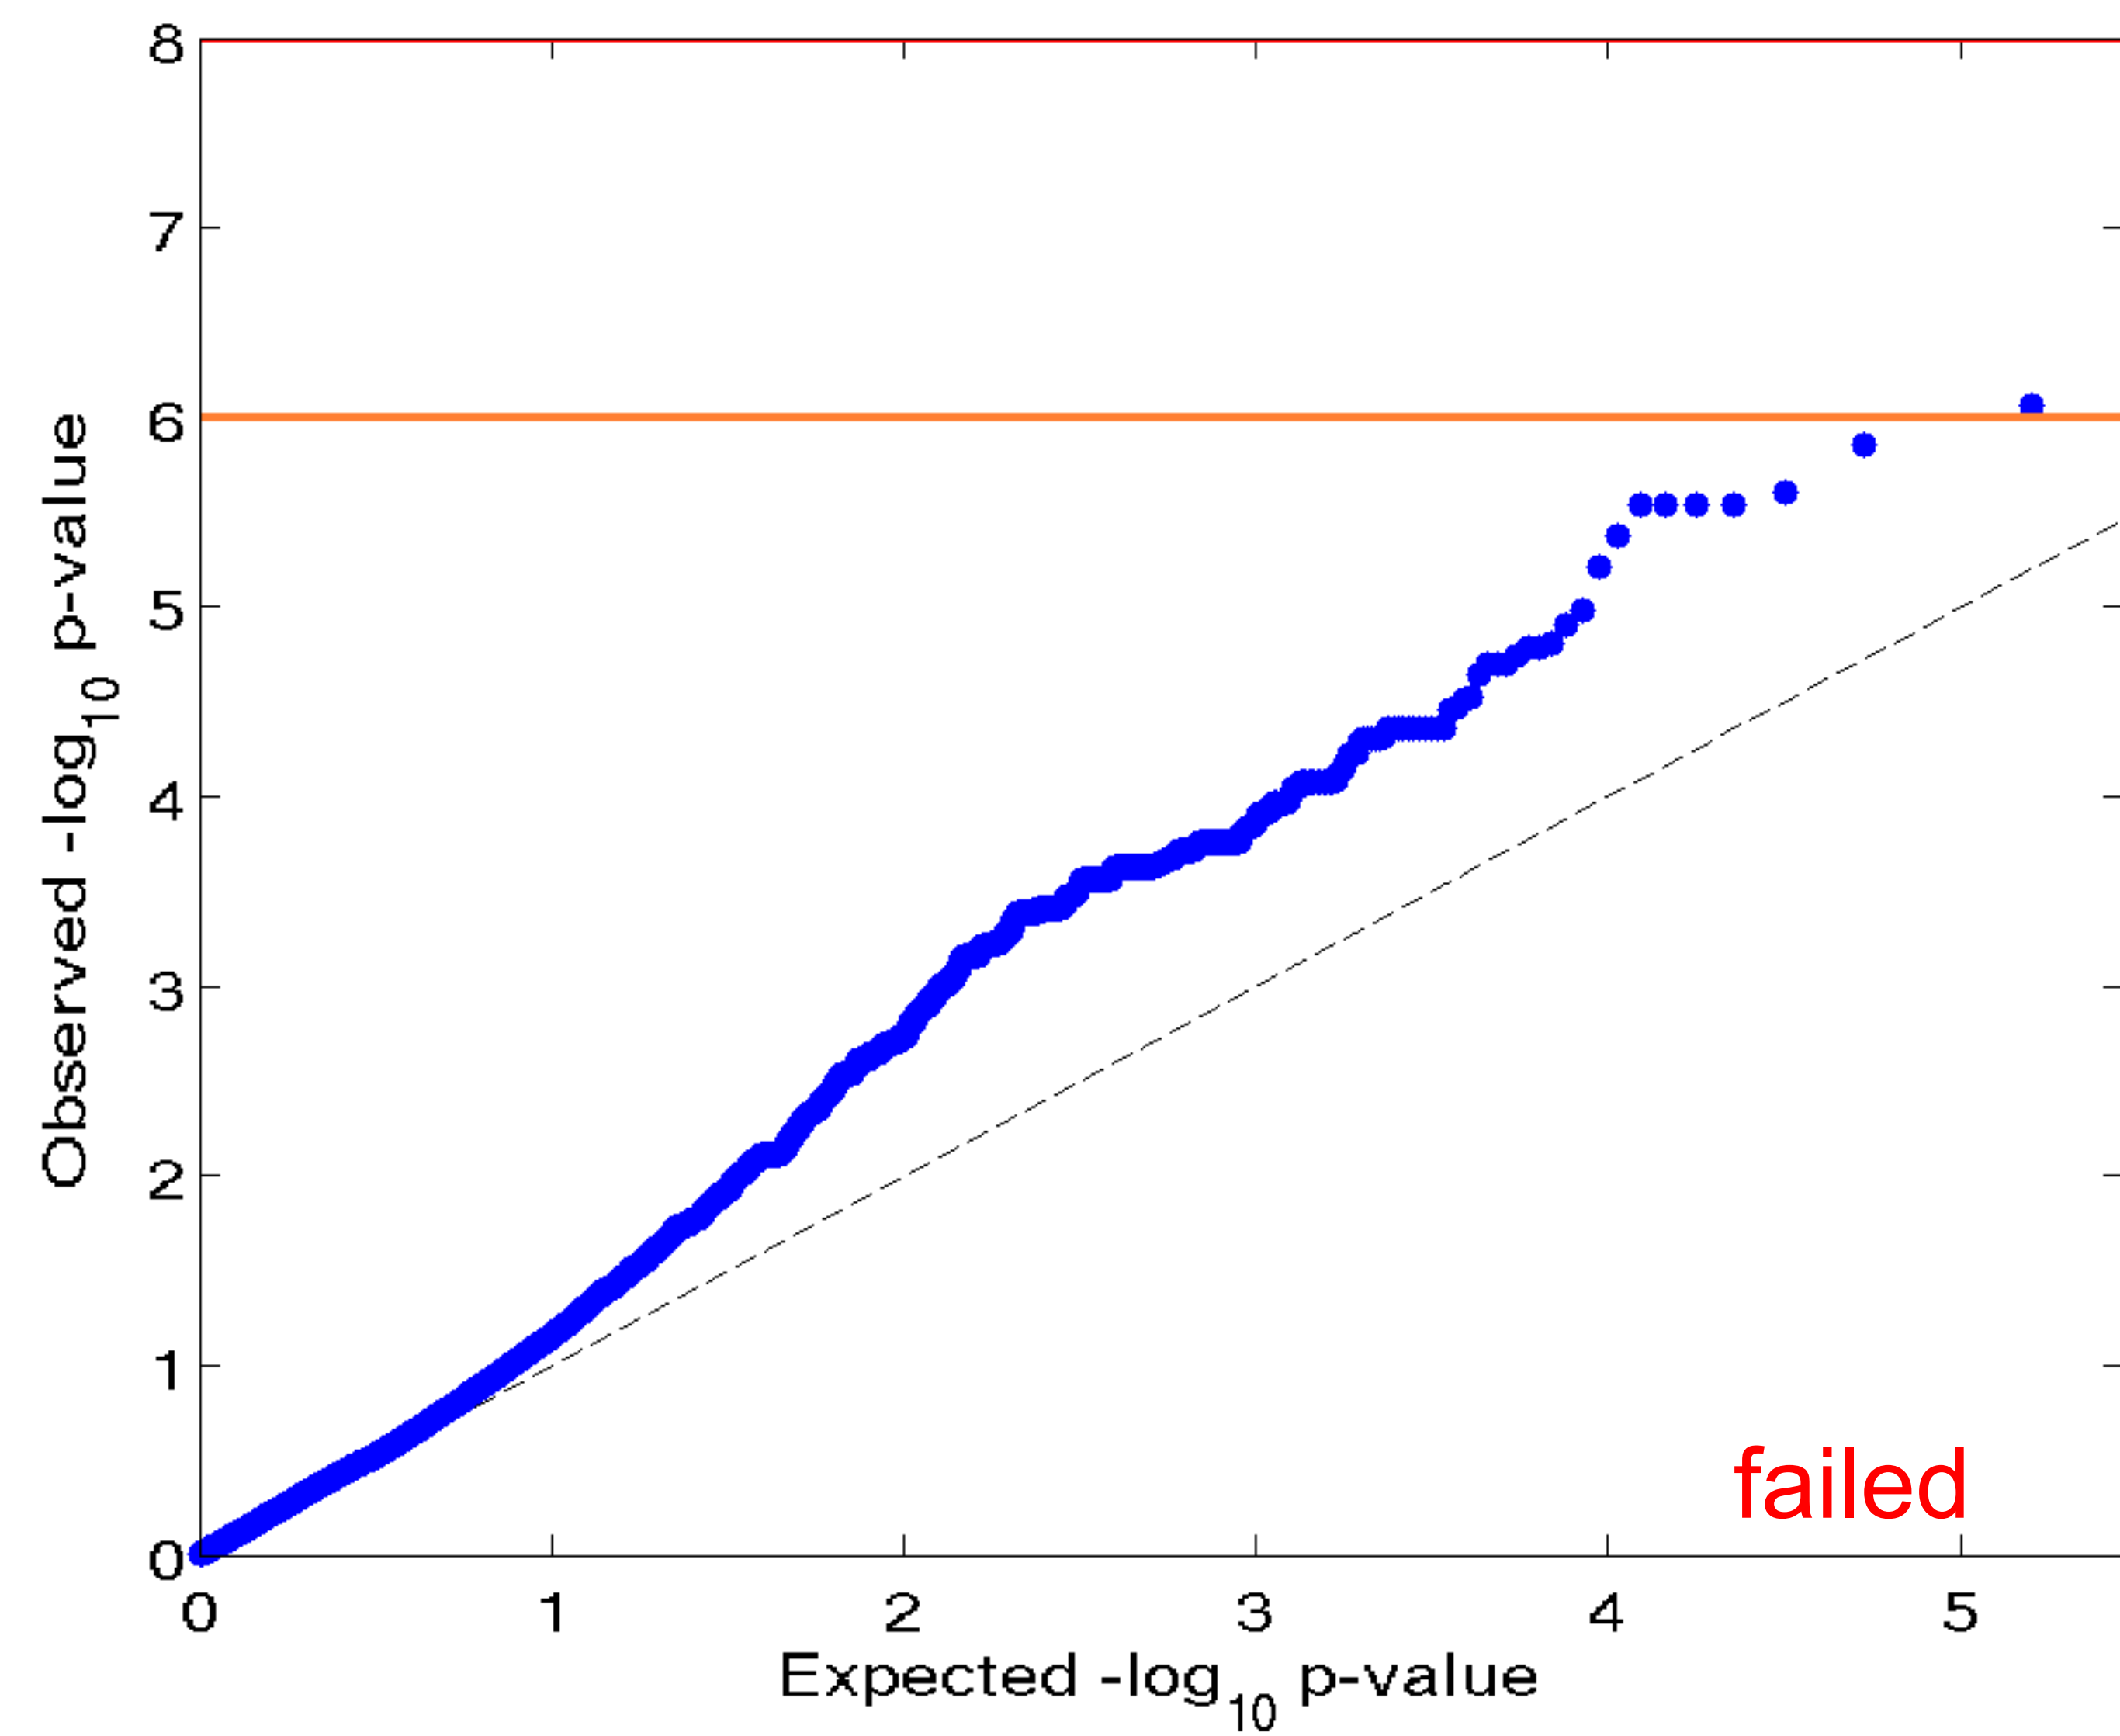



Qamp - iso10

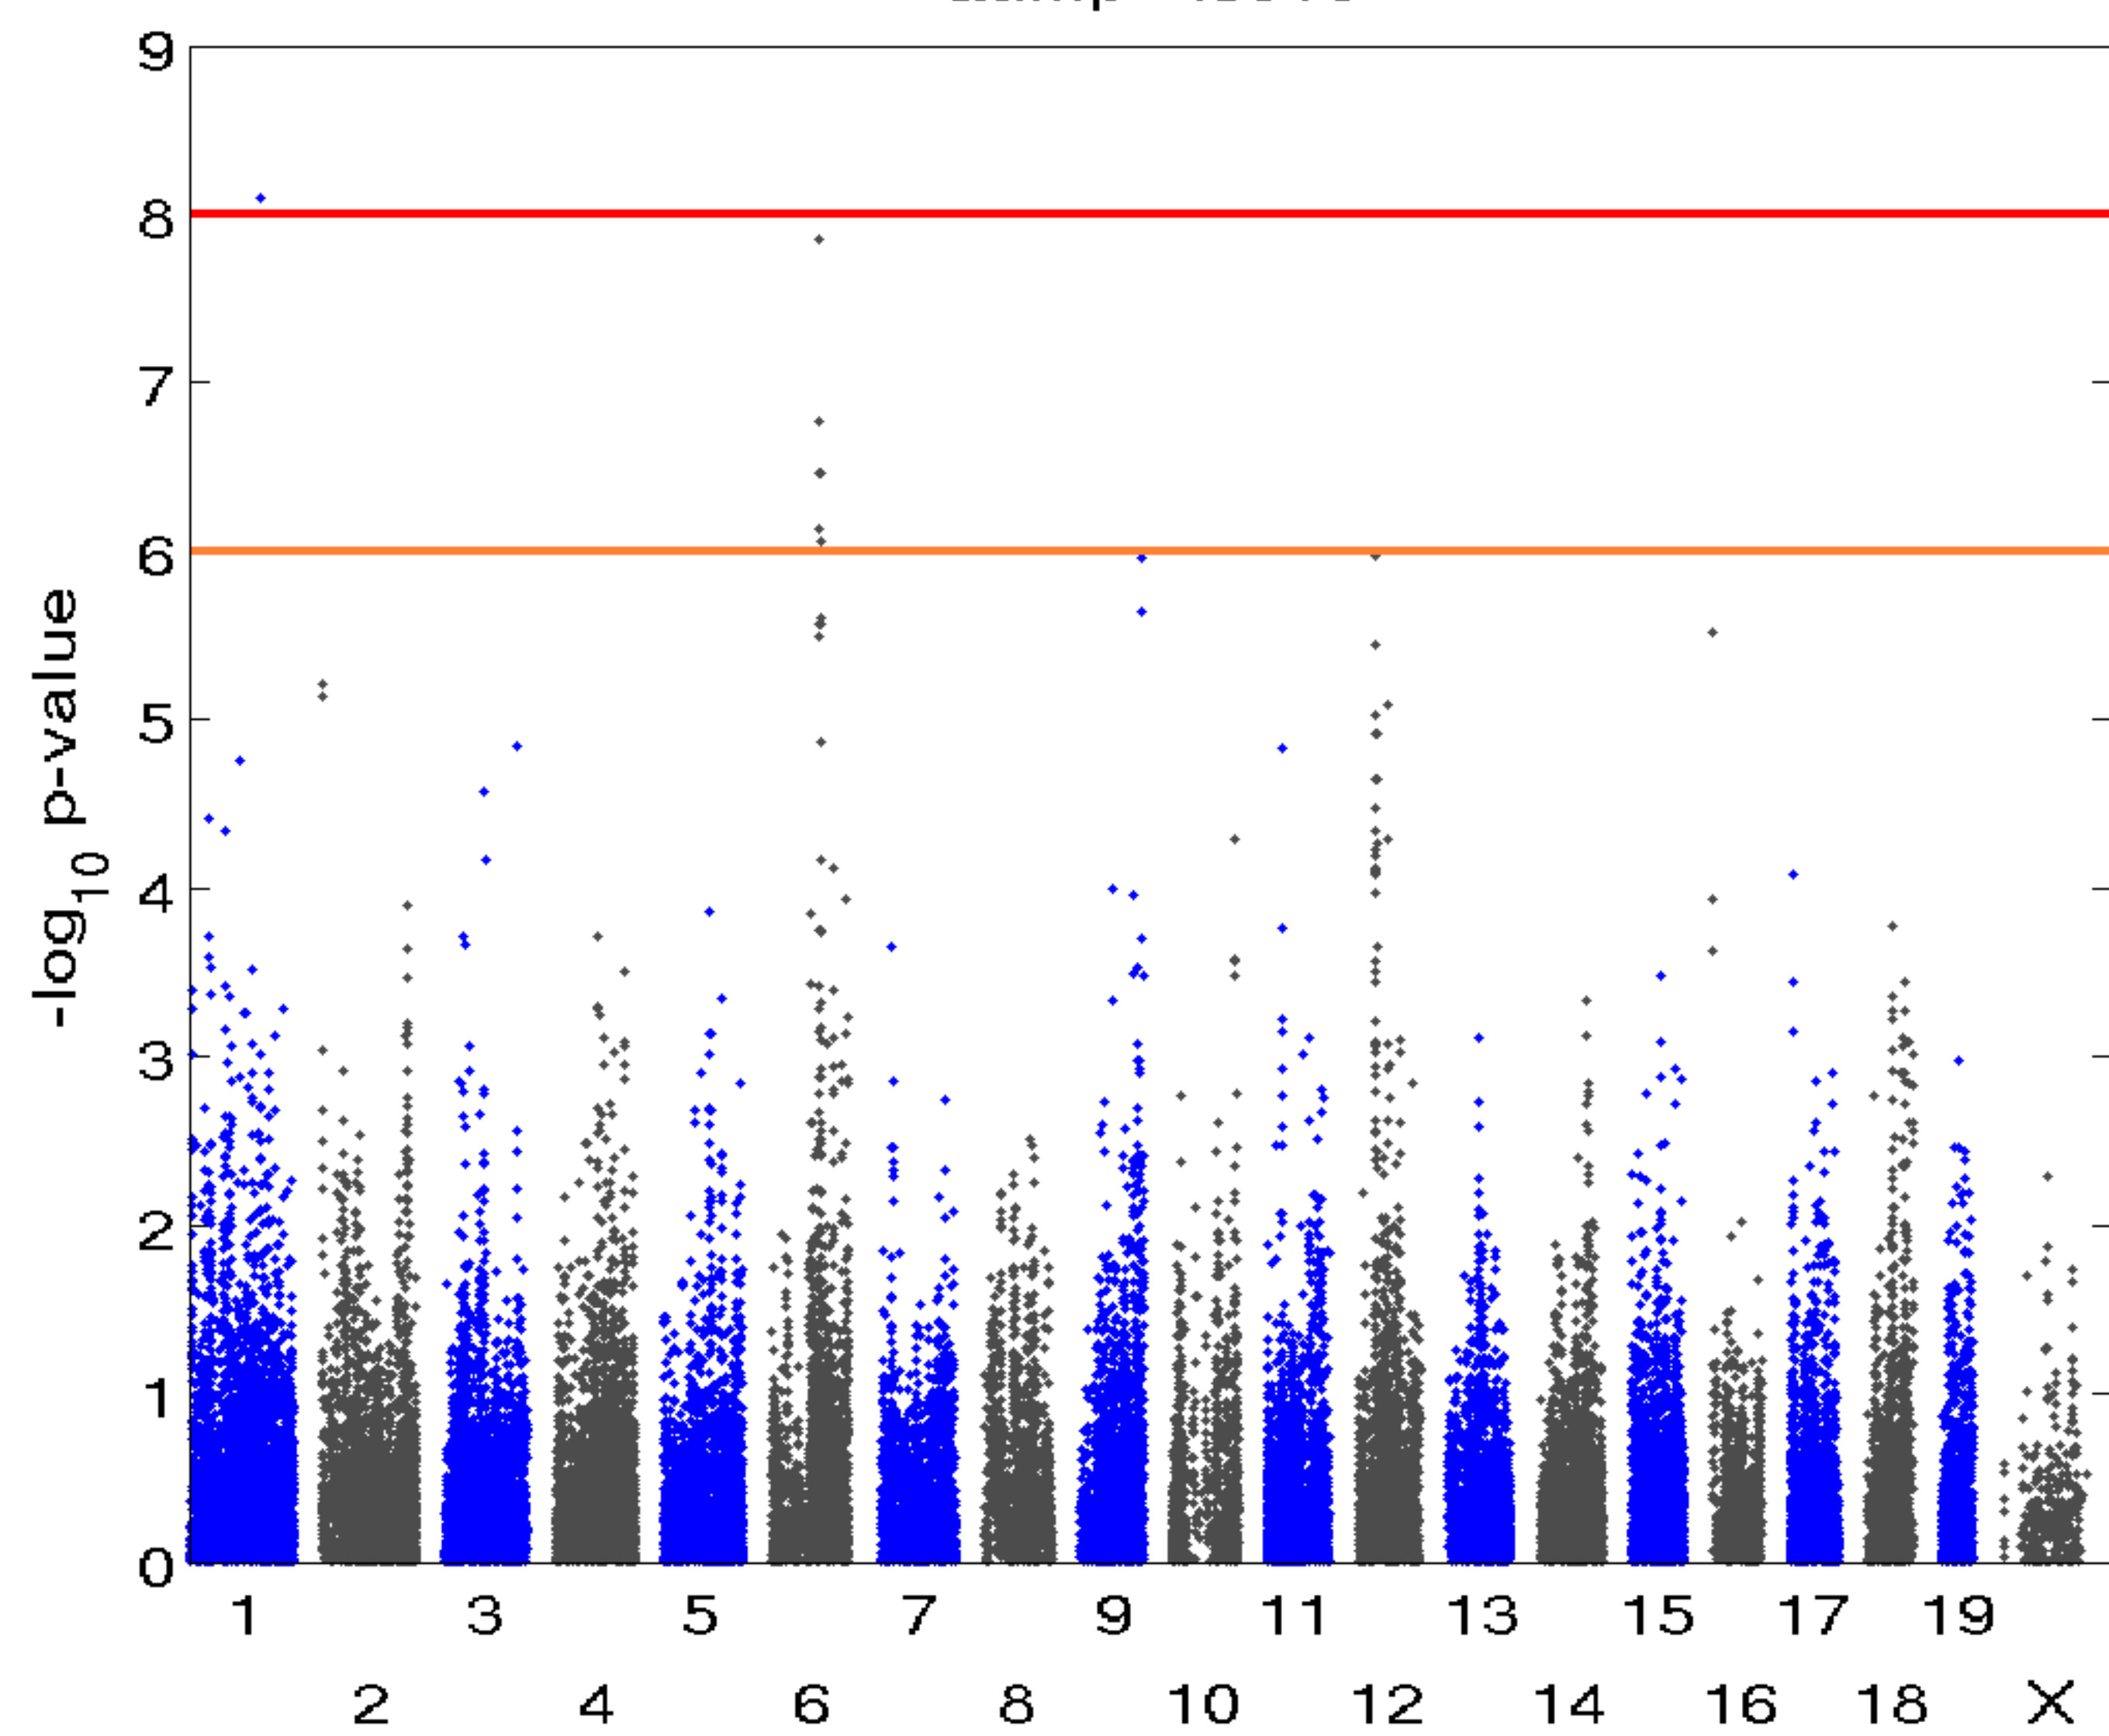

Qamp - iso10

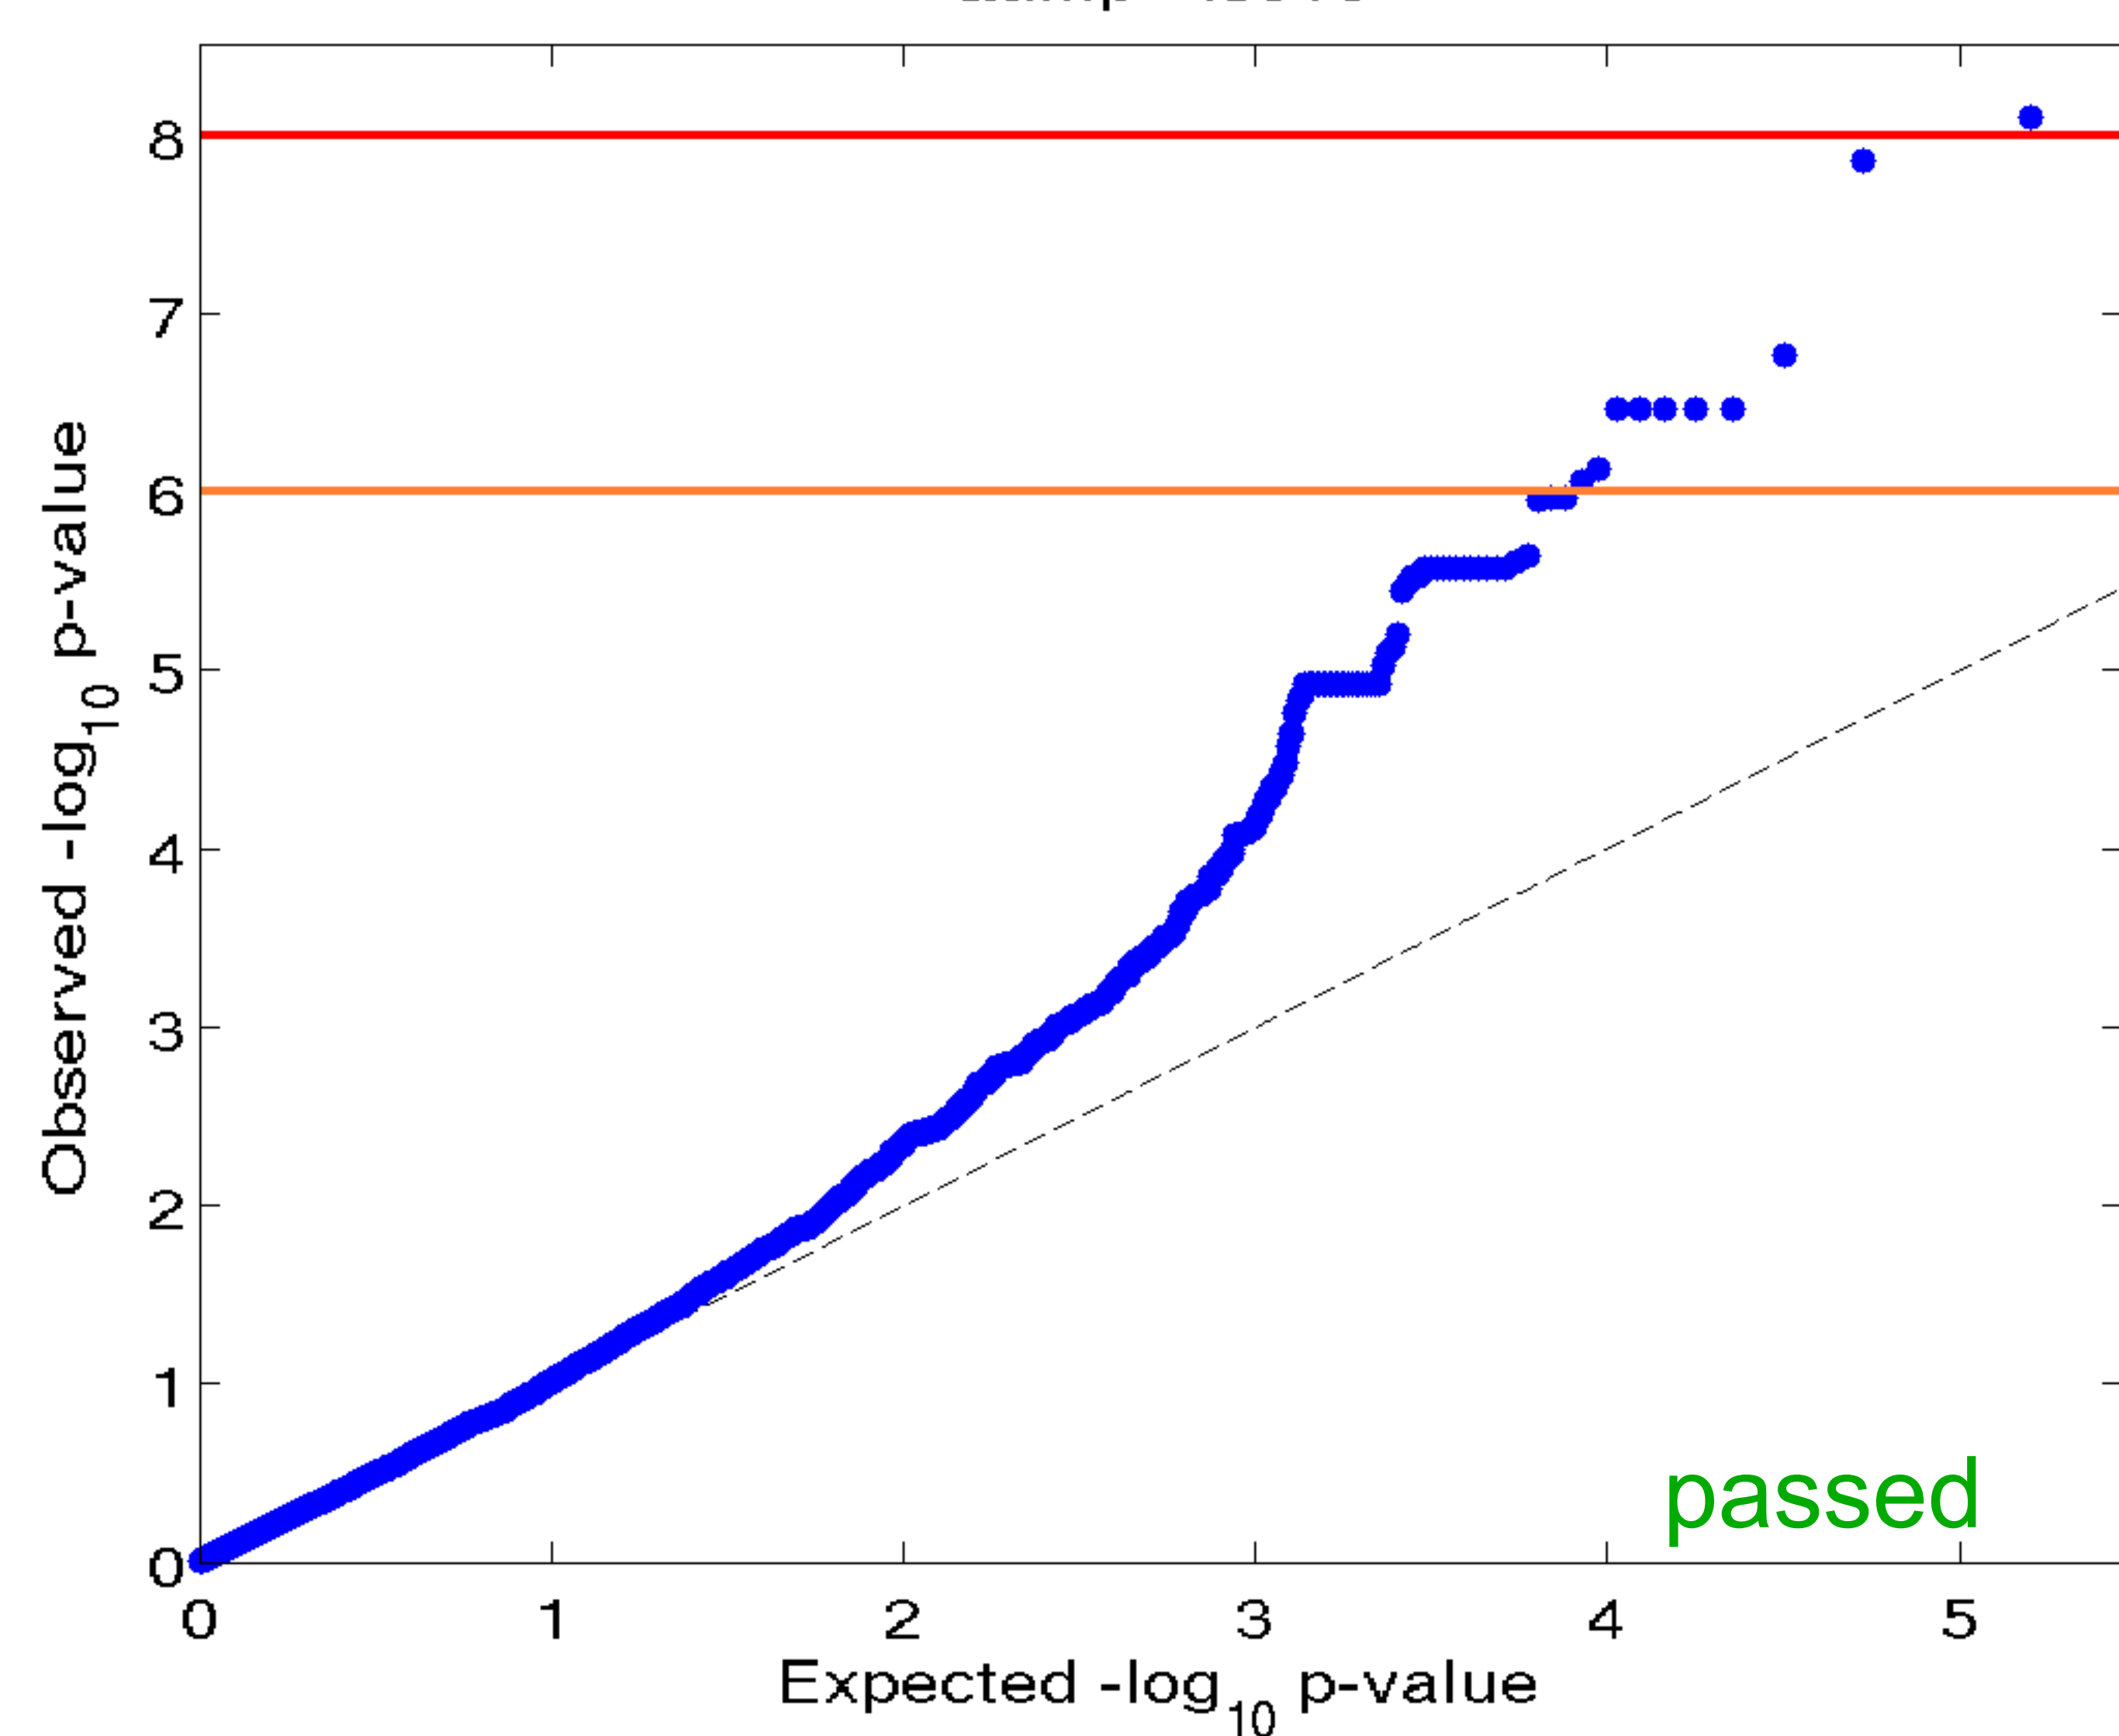

QRSarea - iso10

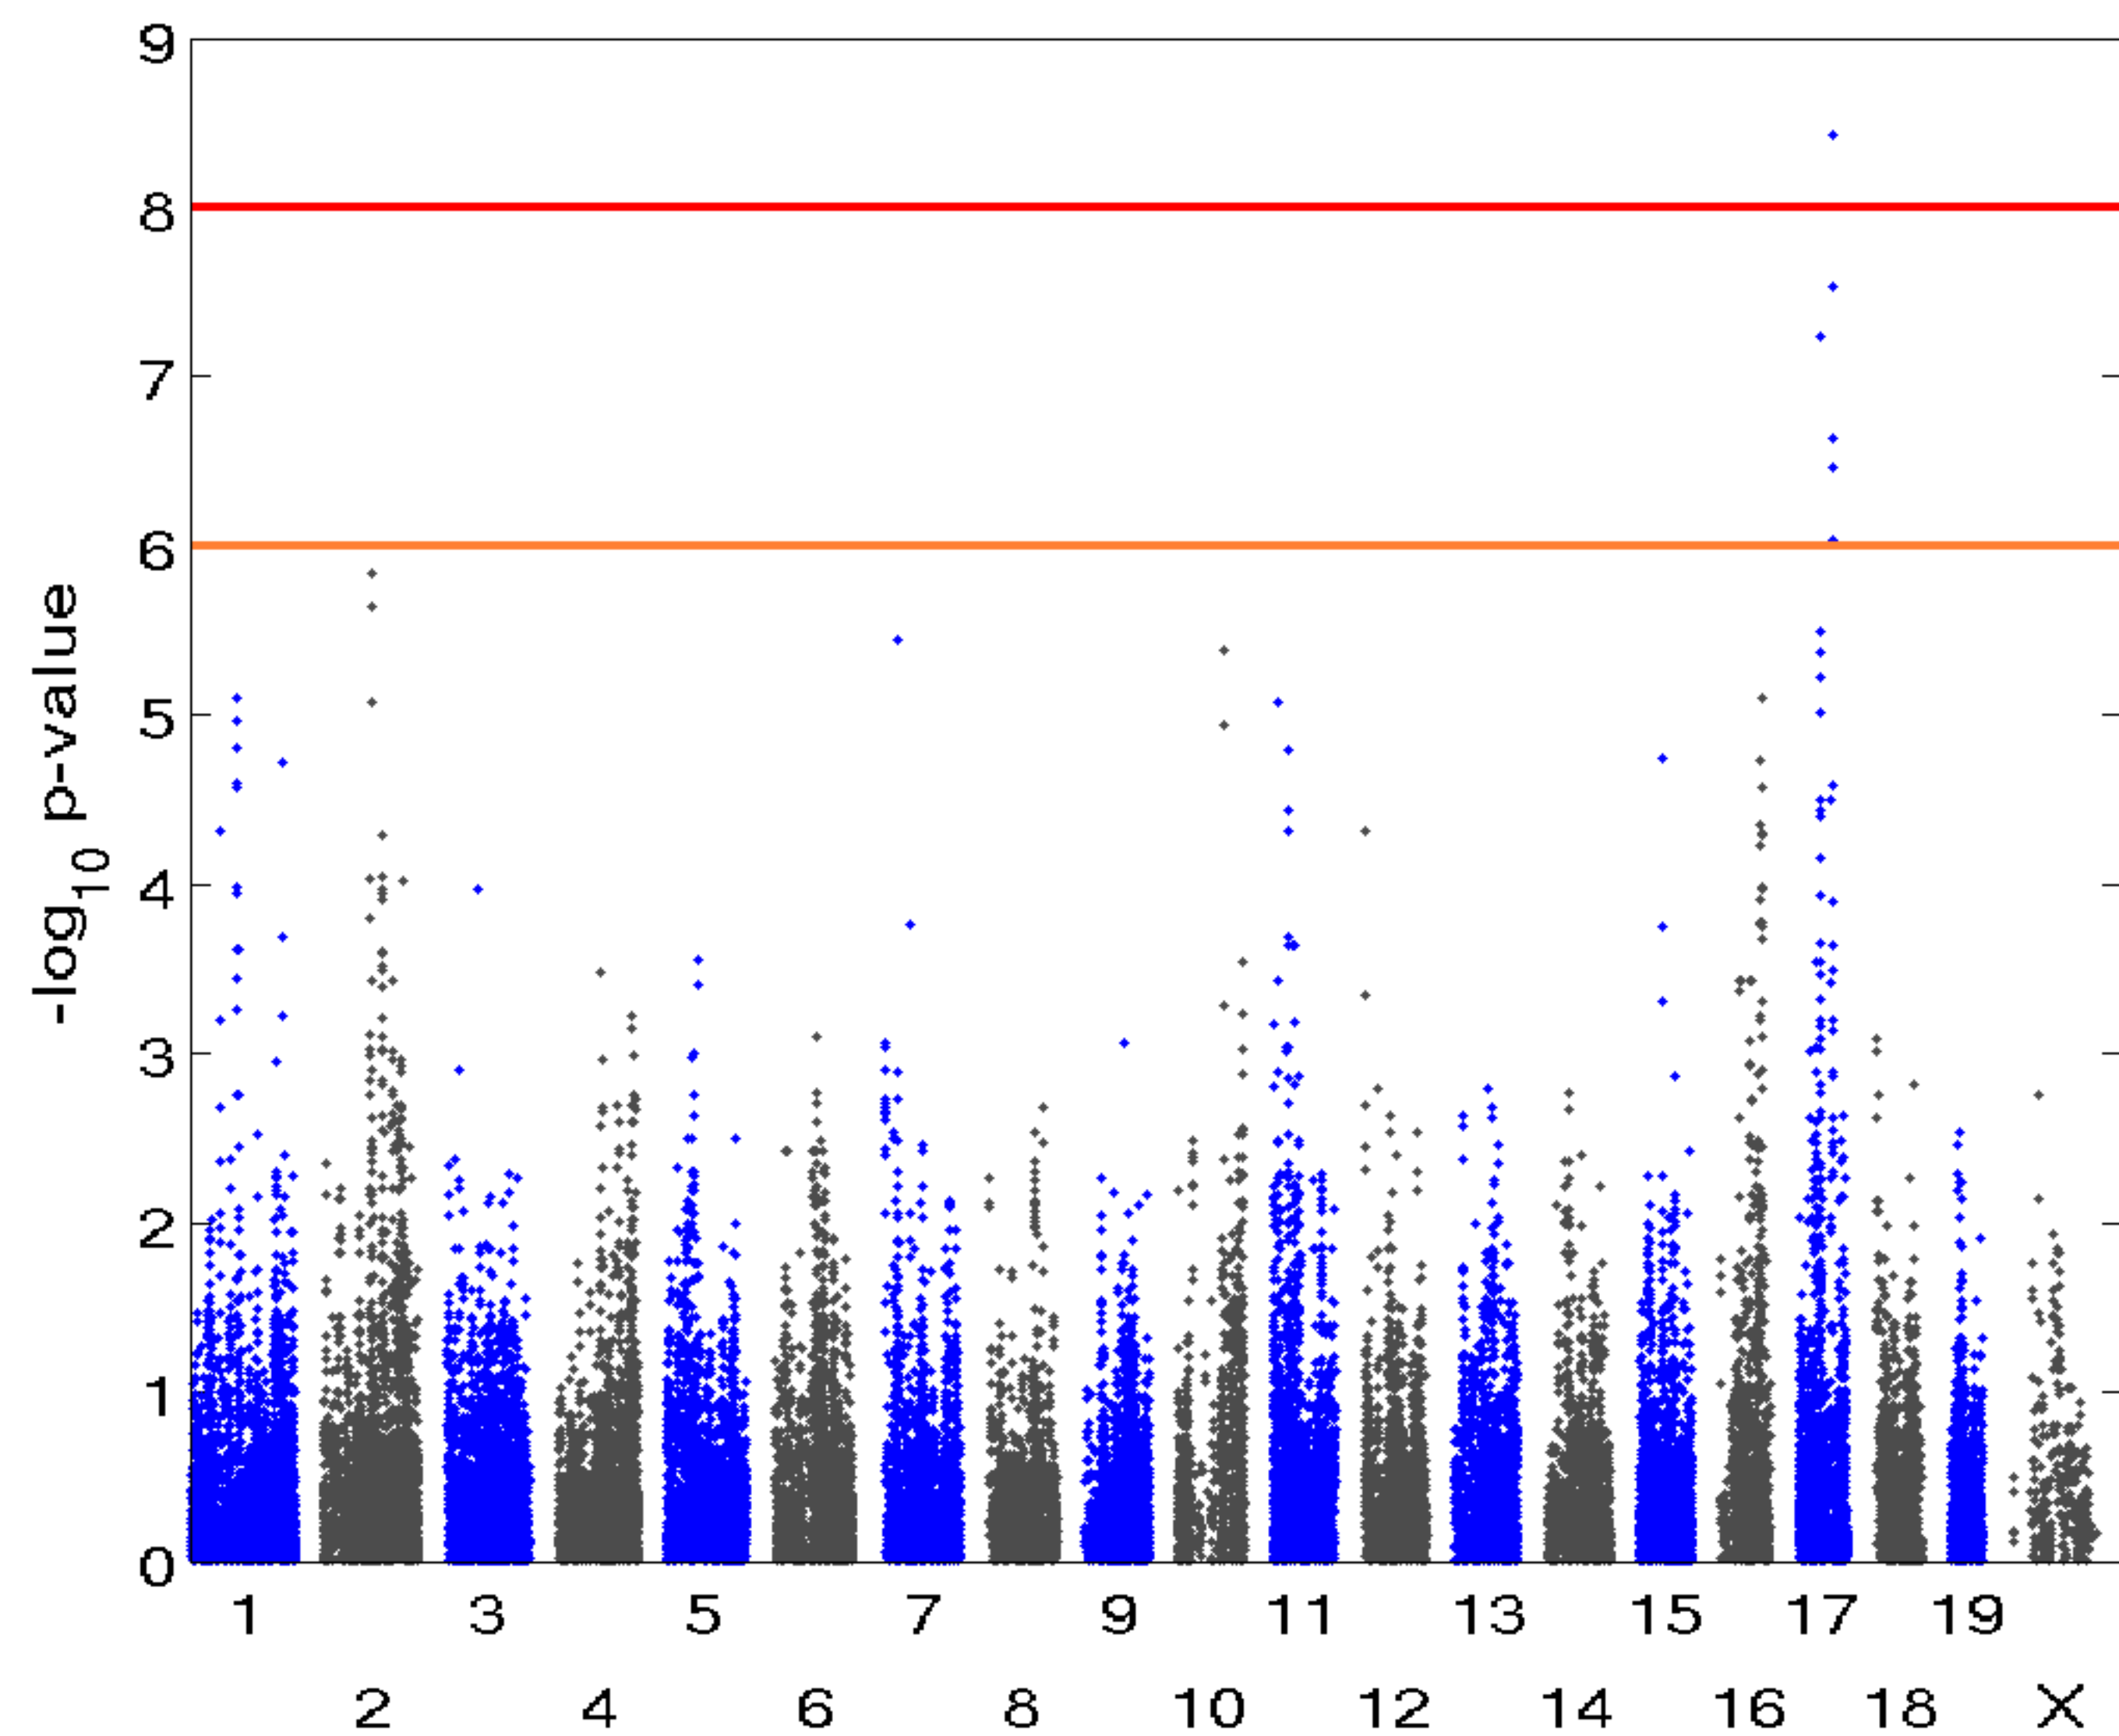

QRSarea - iso10

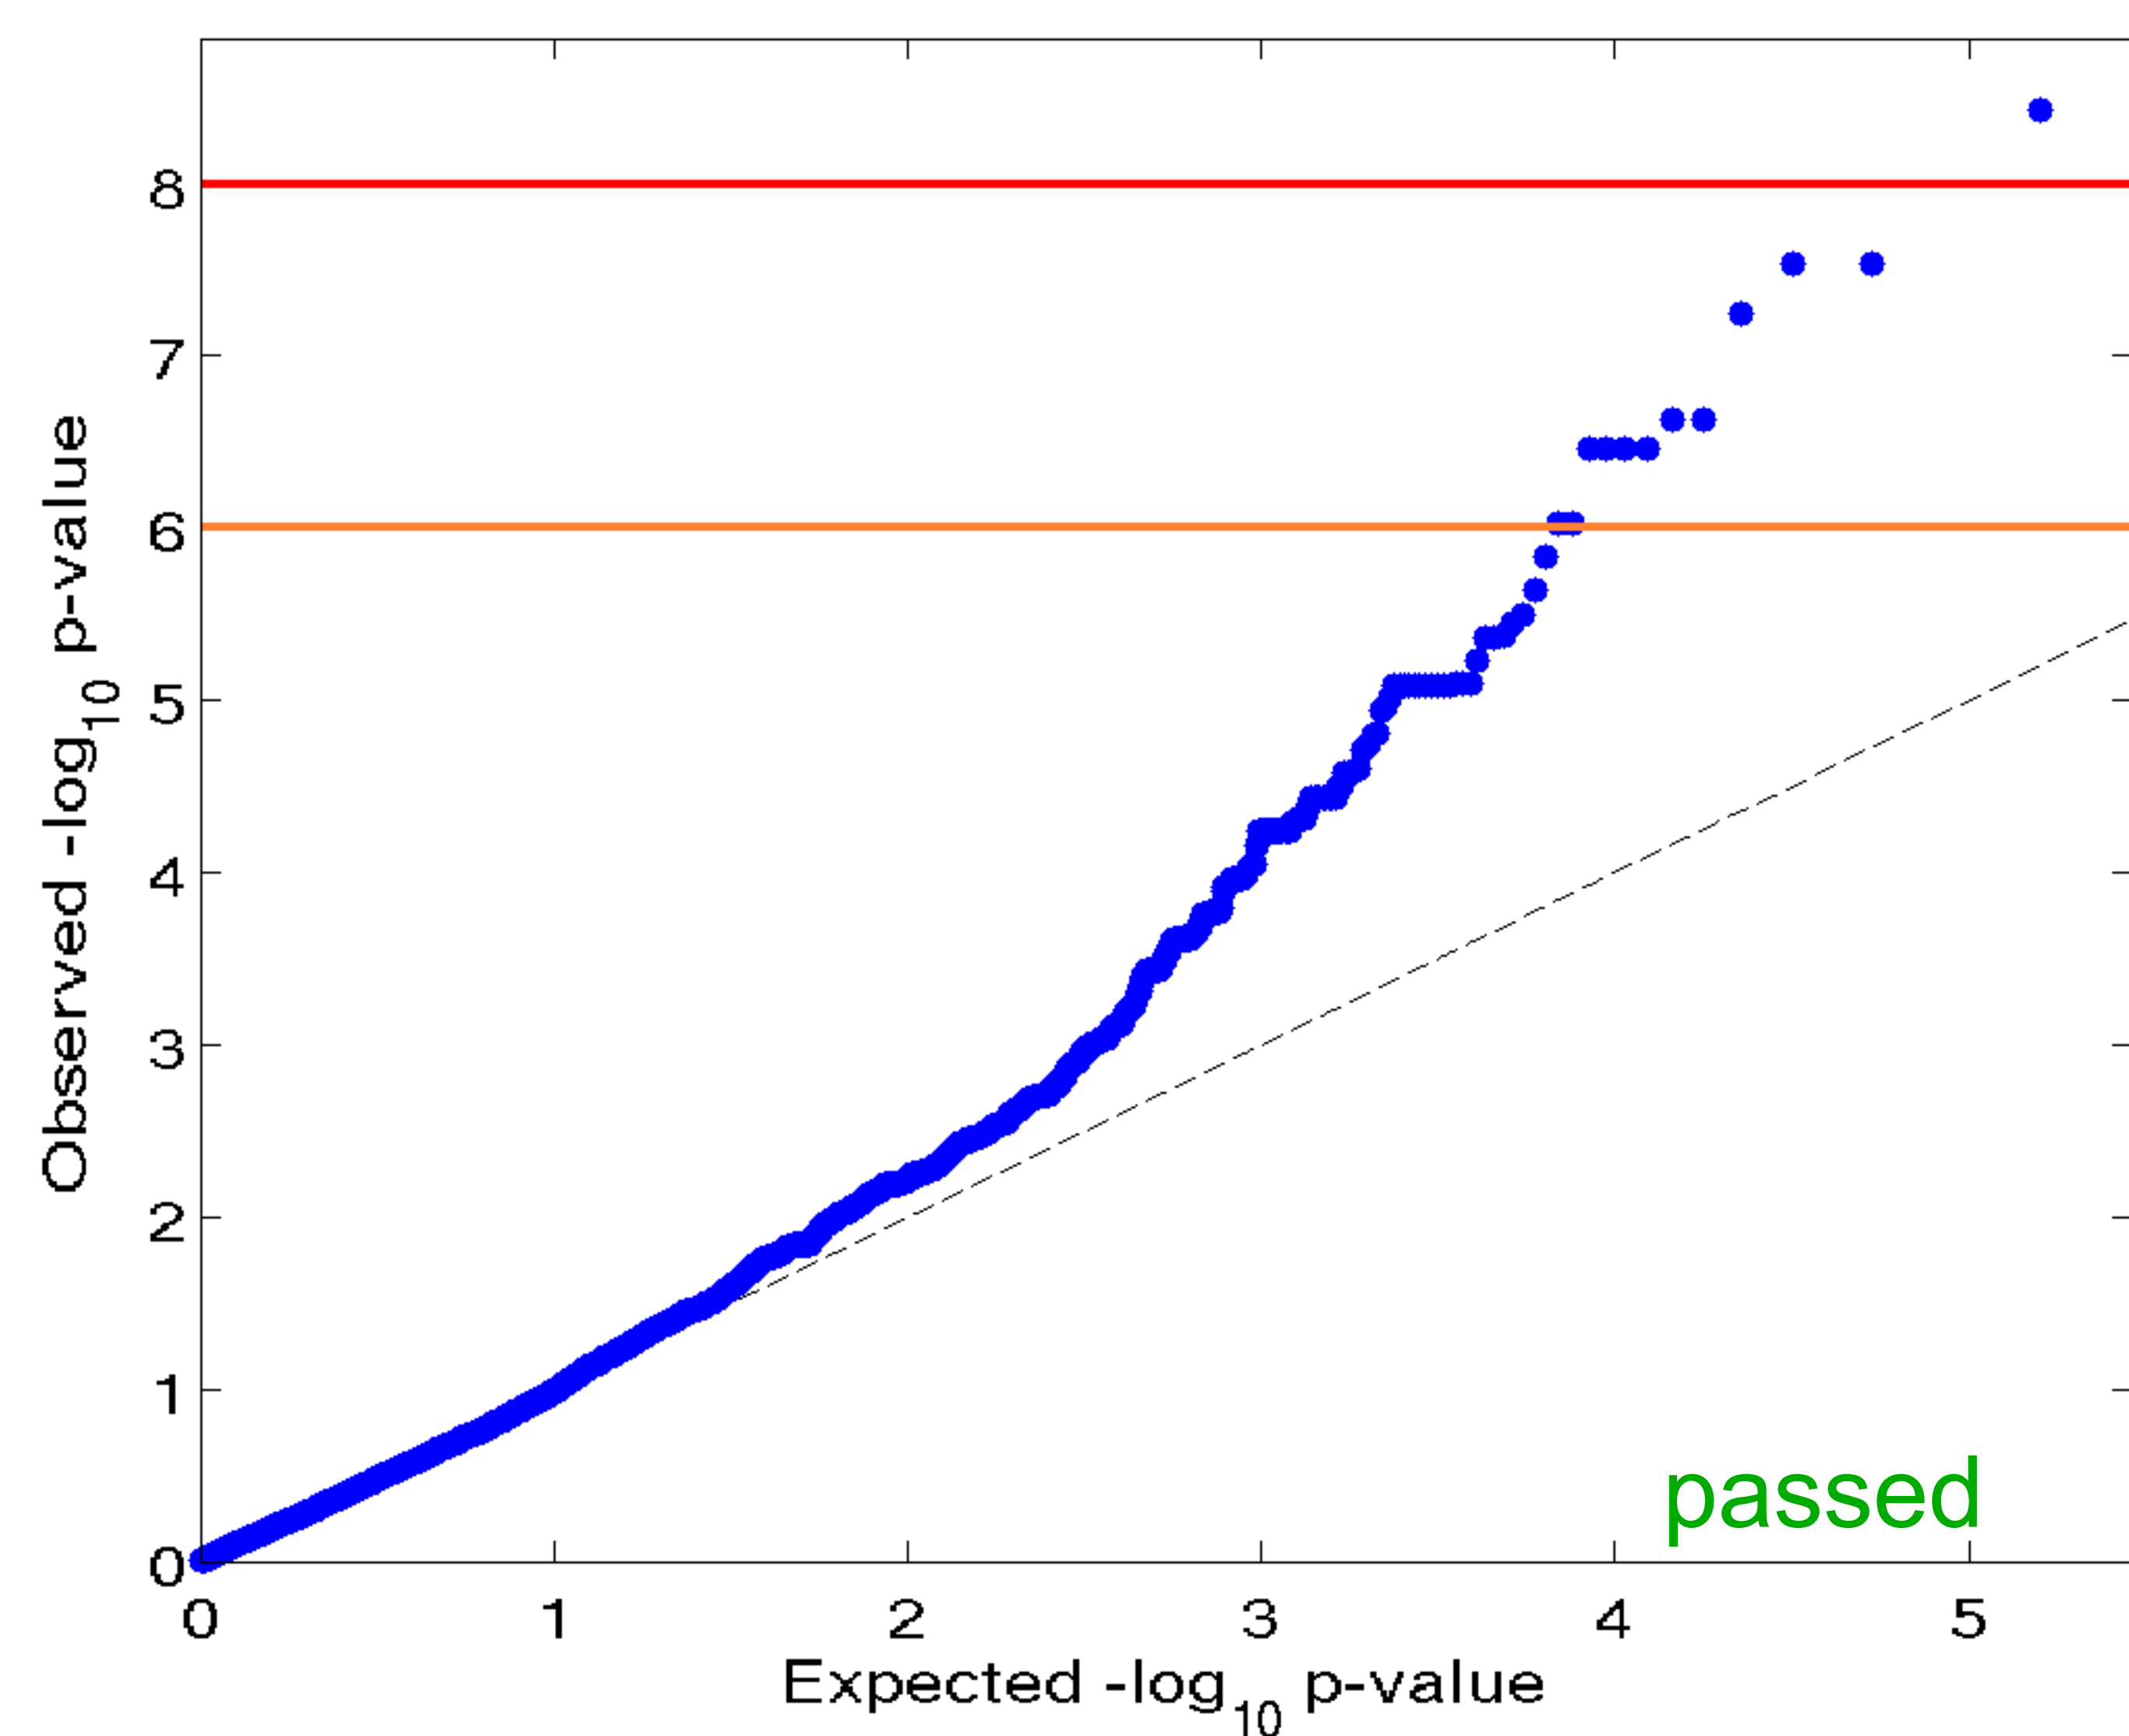

QRS - iso10

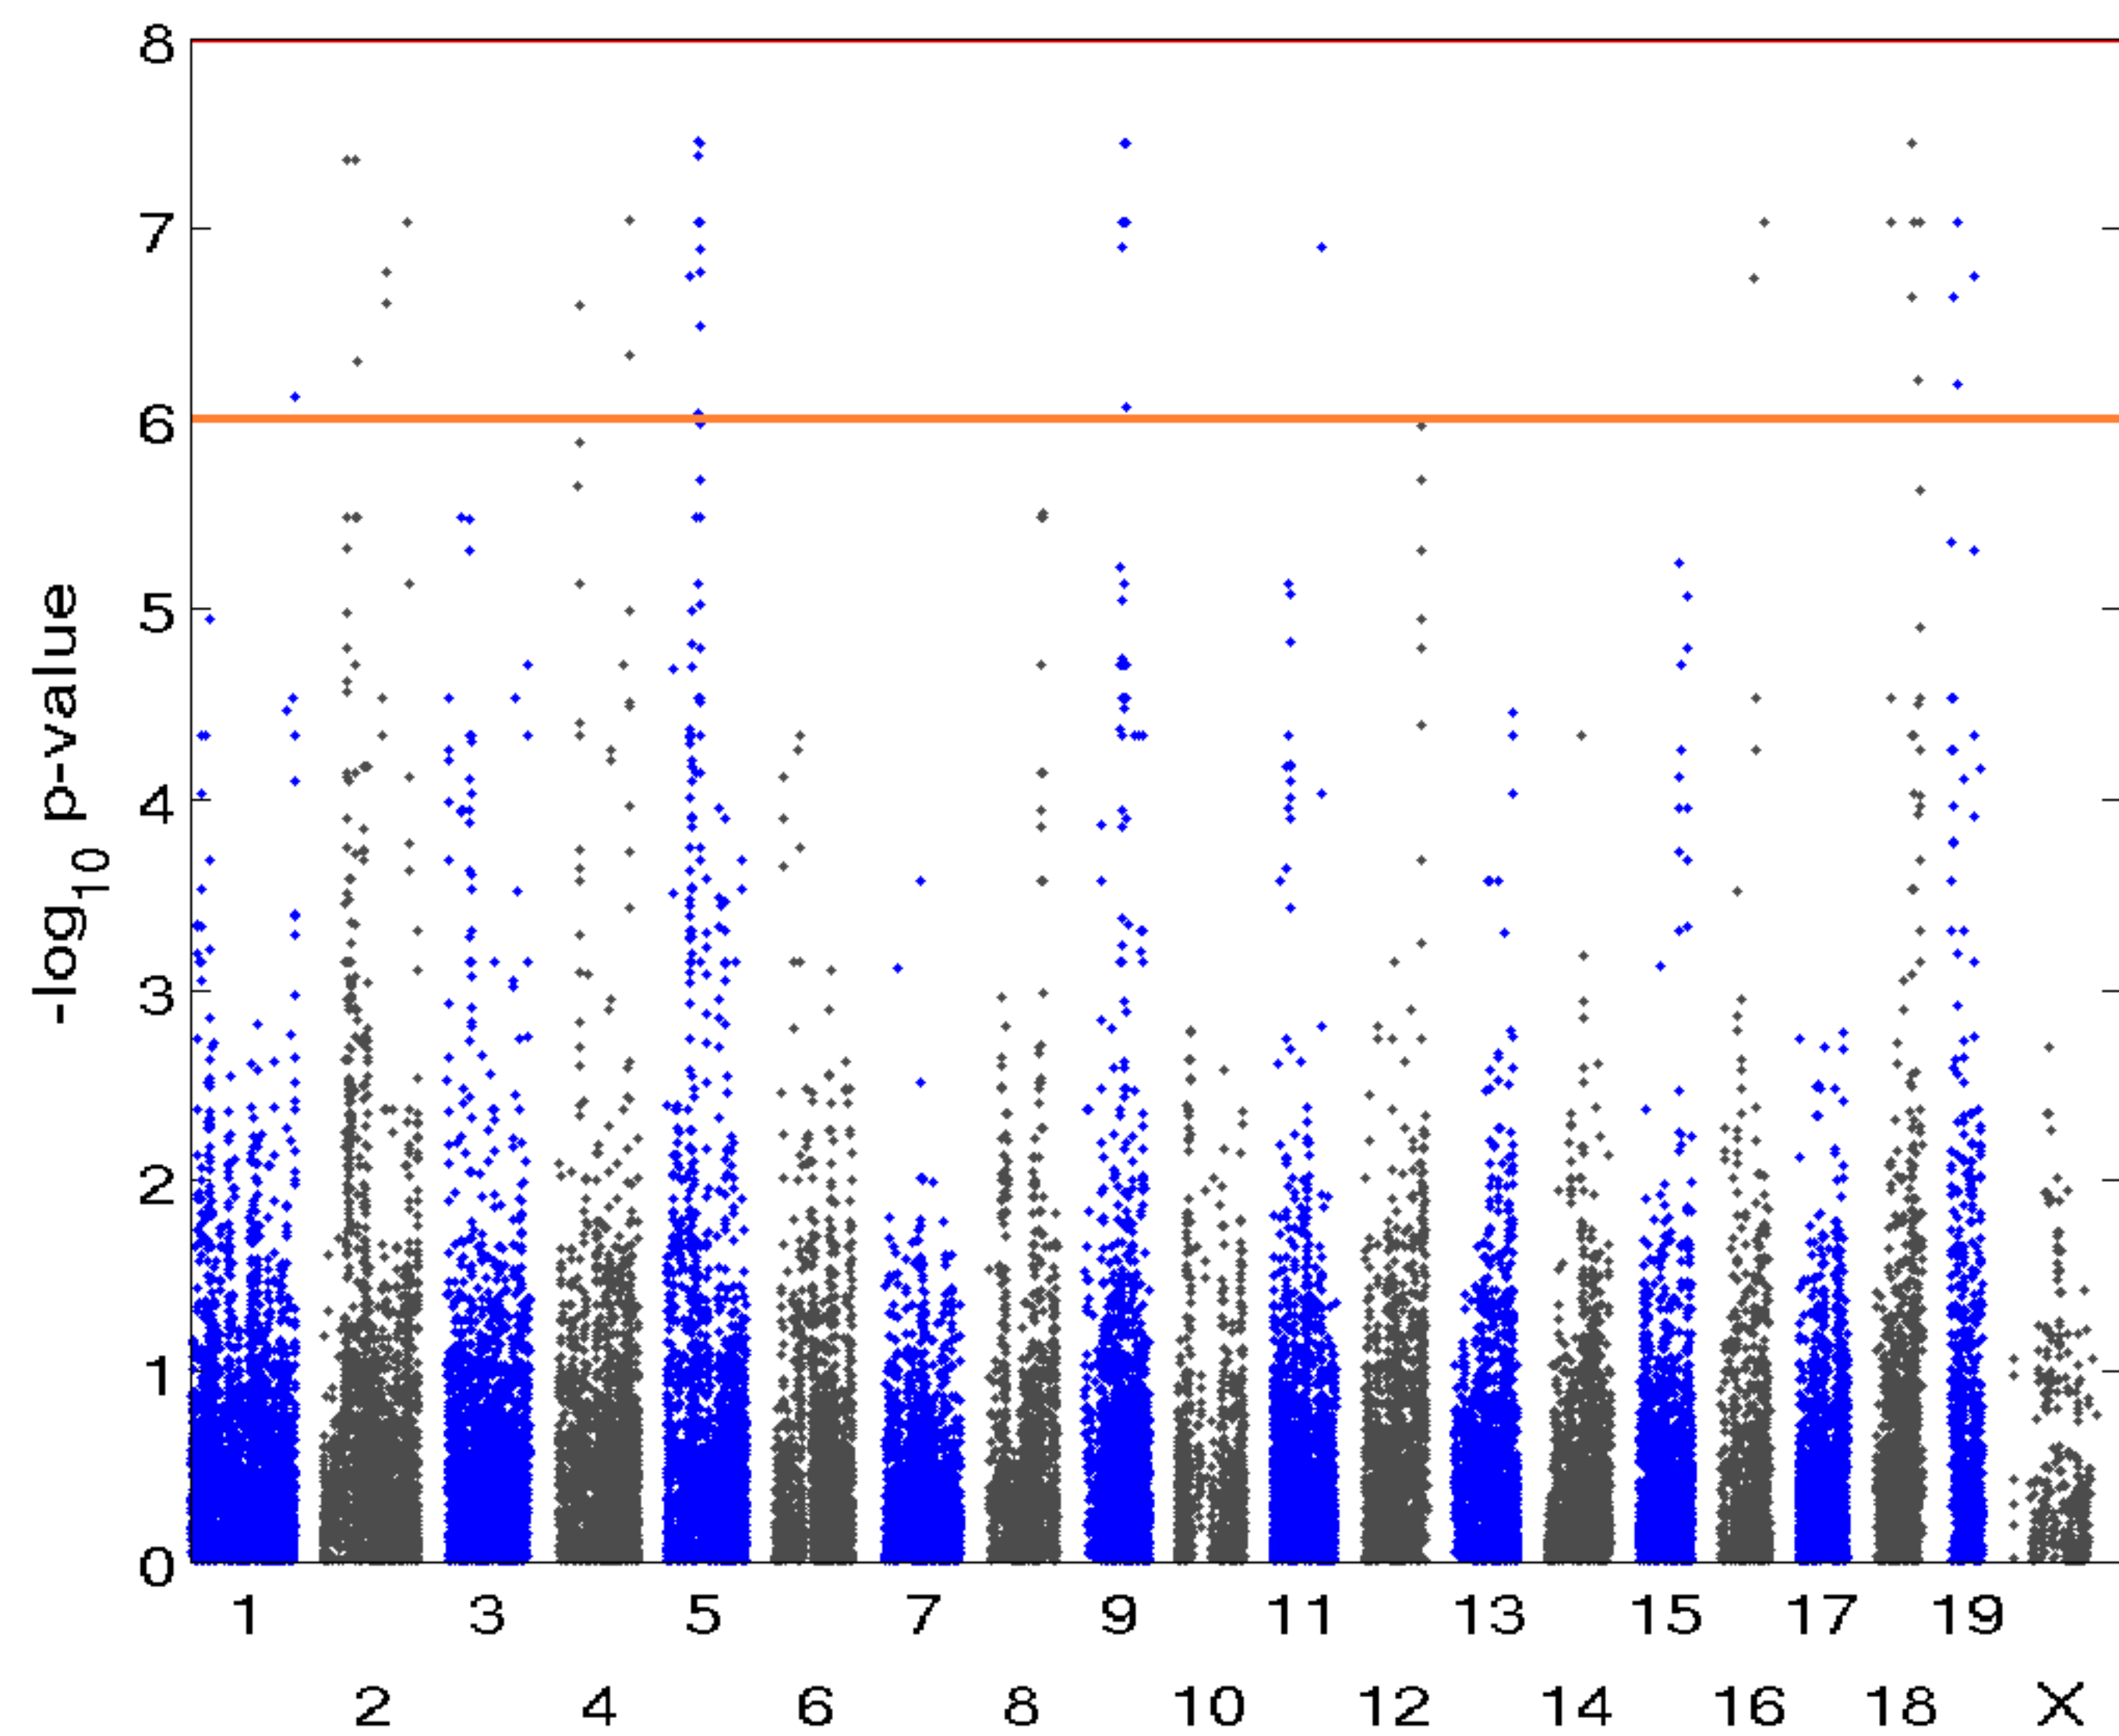

QRS - iso10

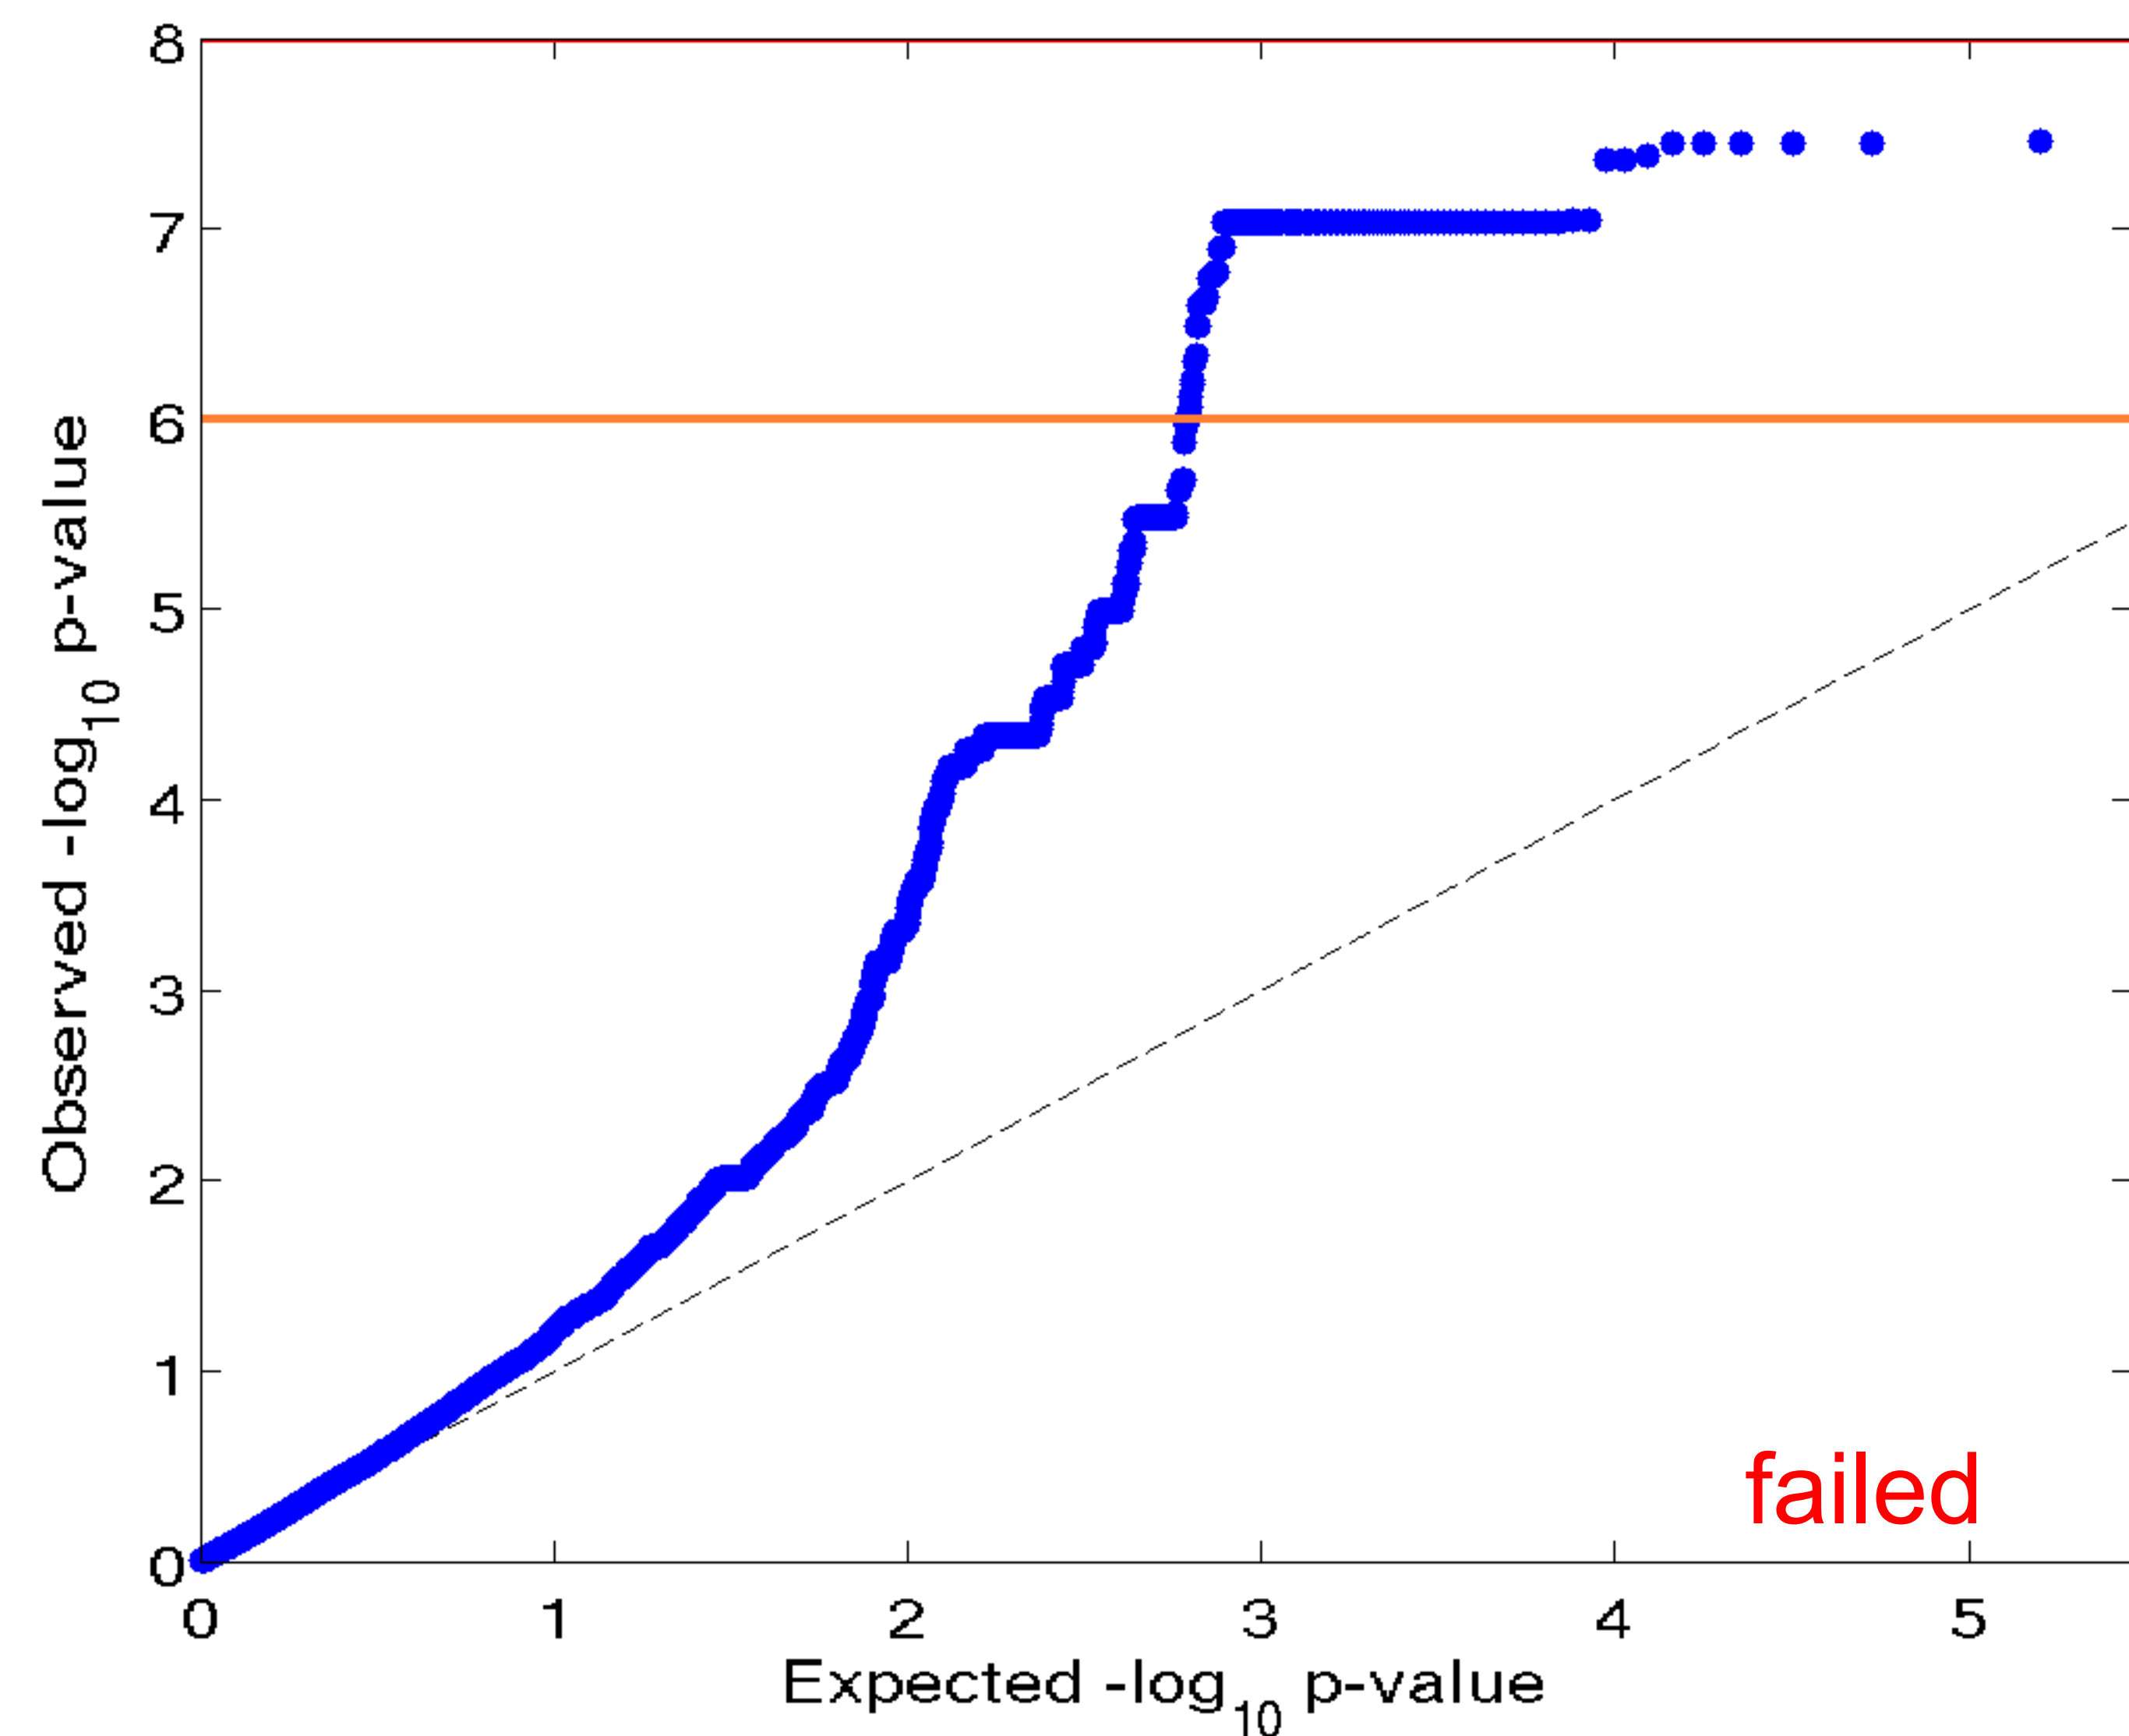

QTc - iso10

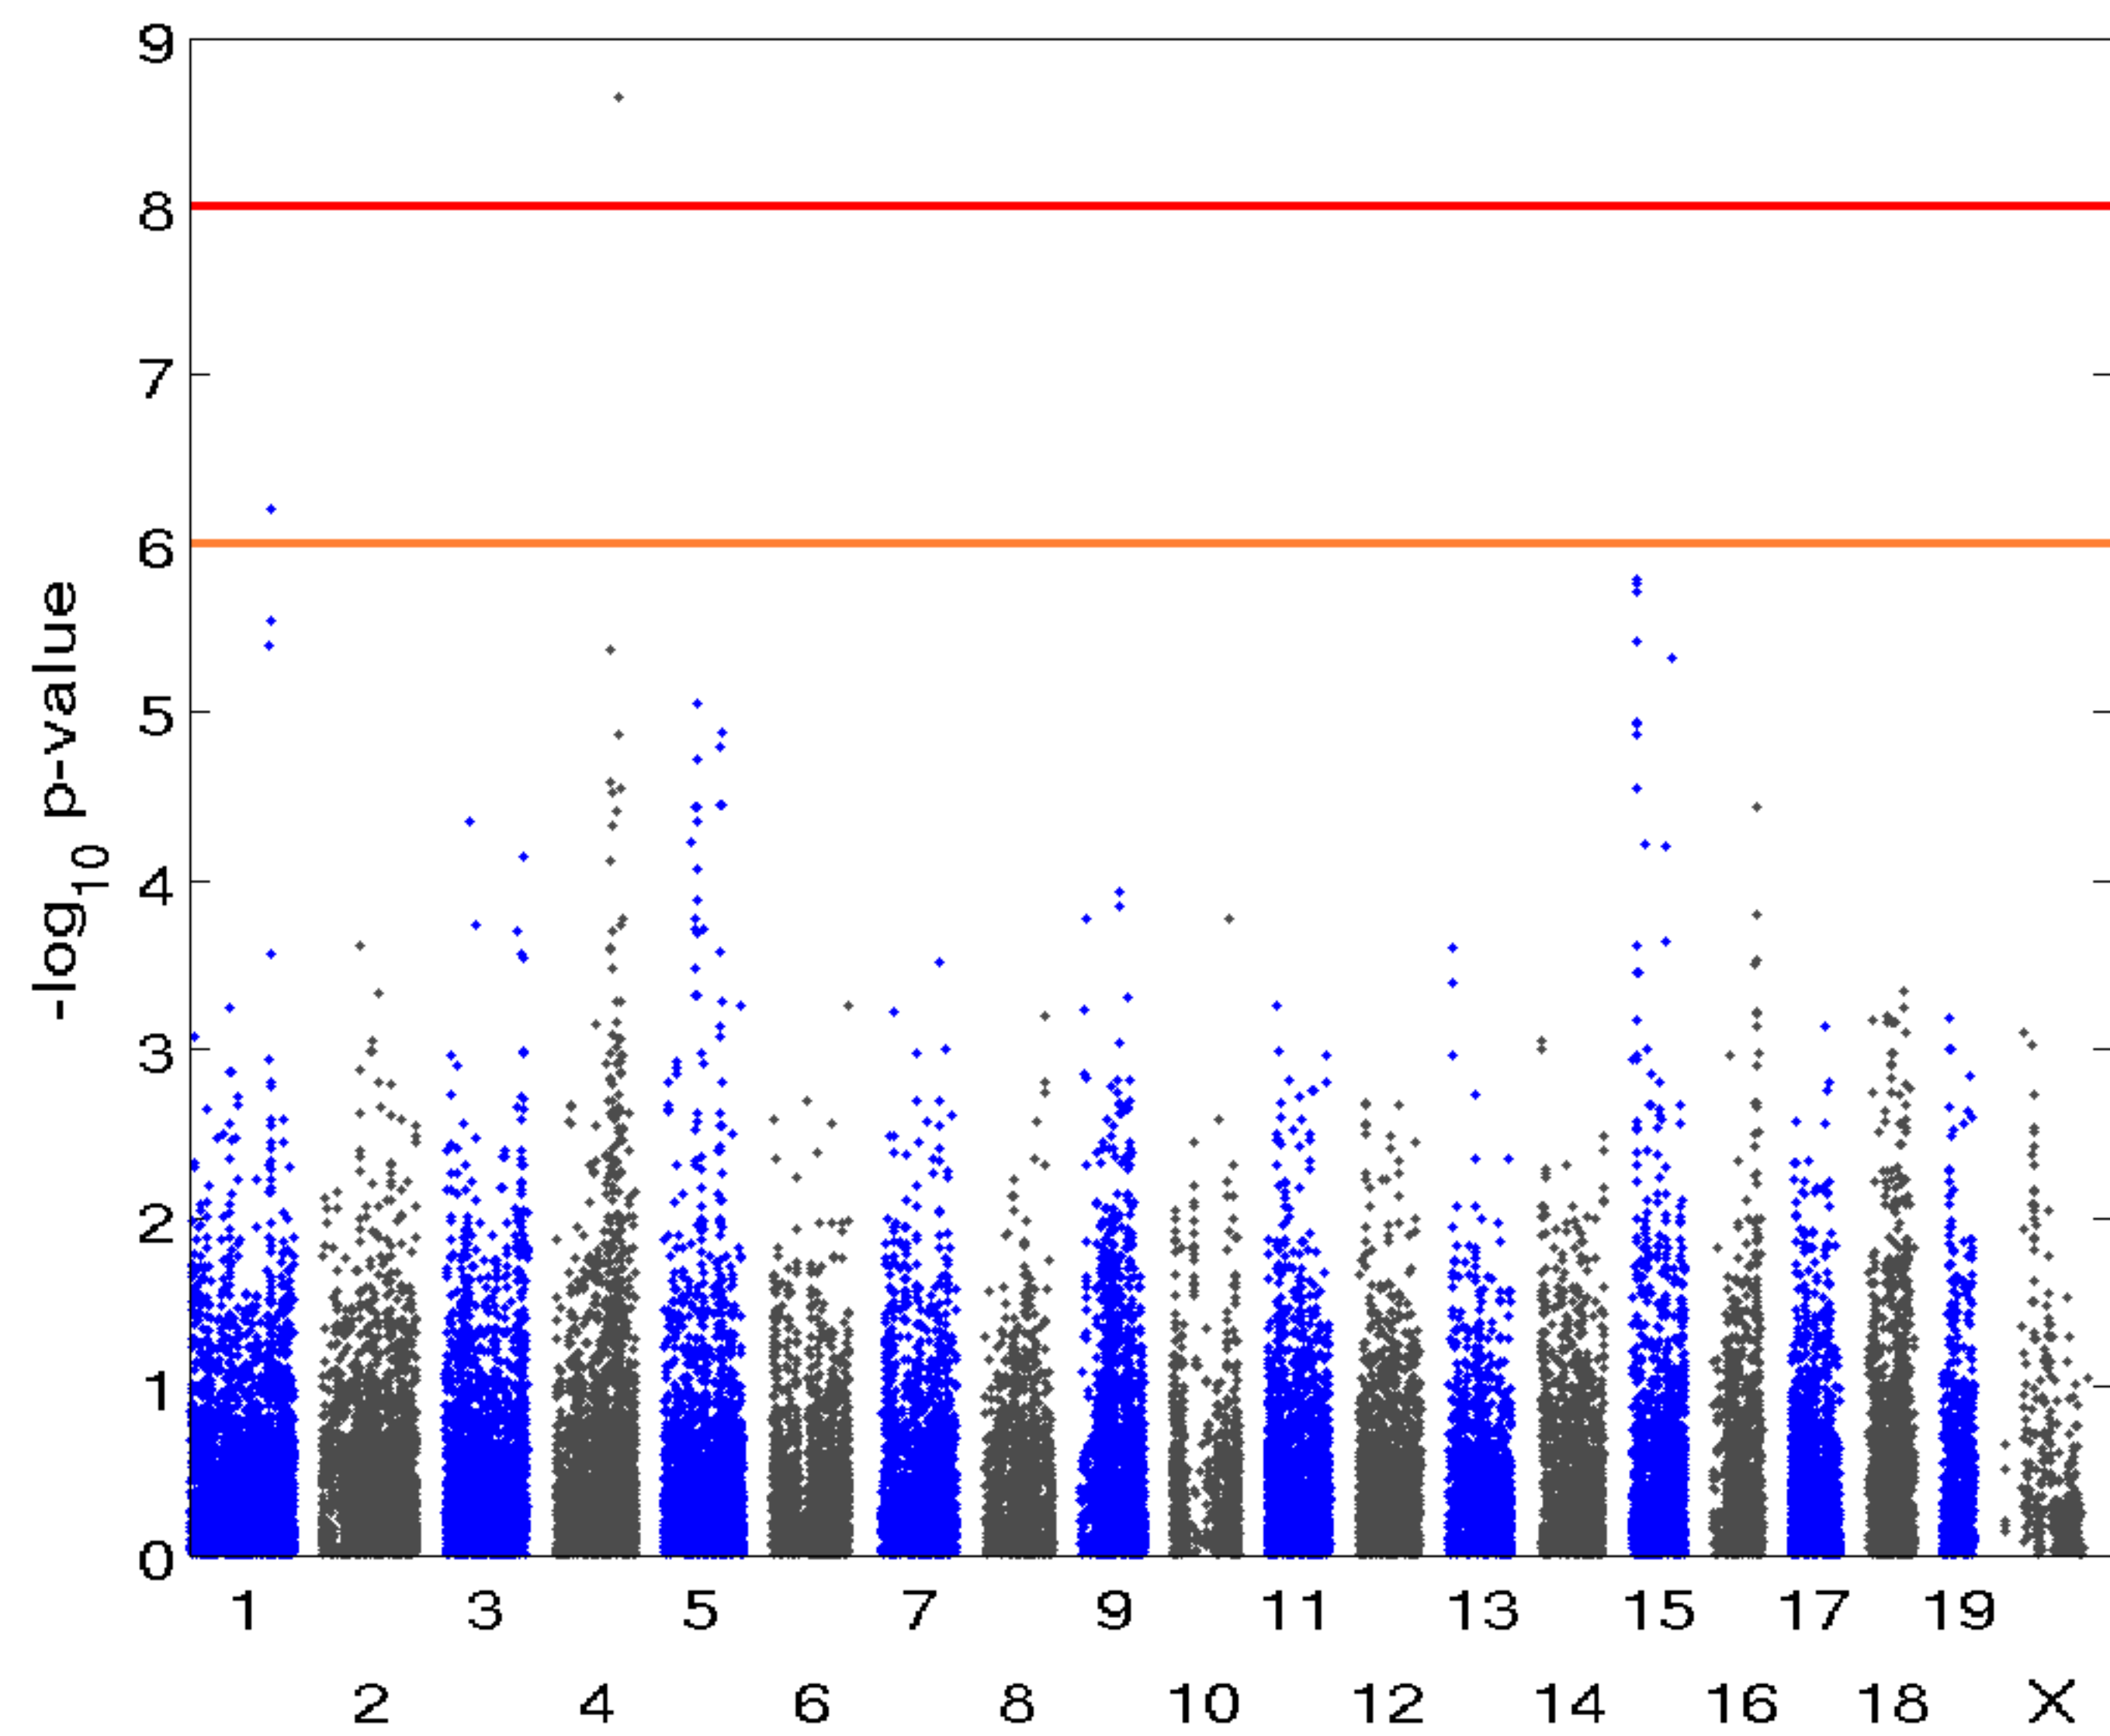

QTc - iso10

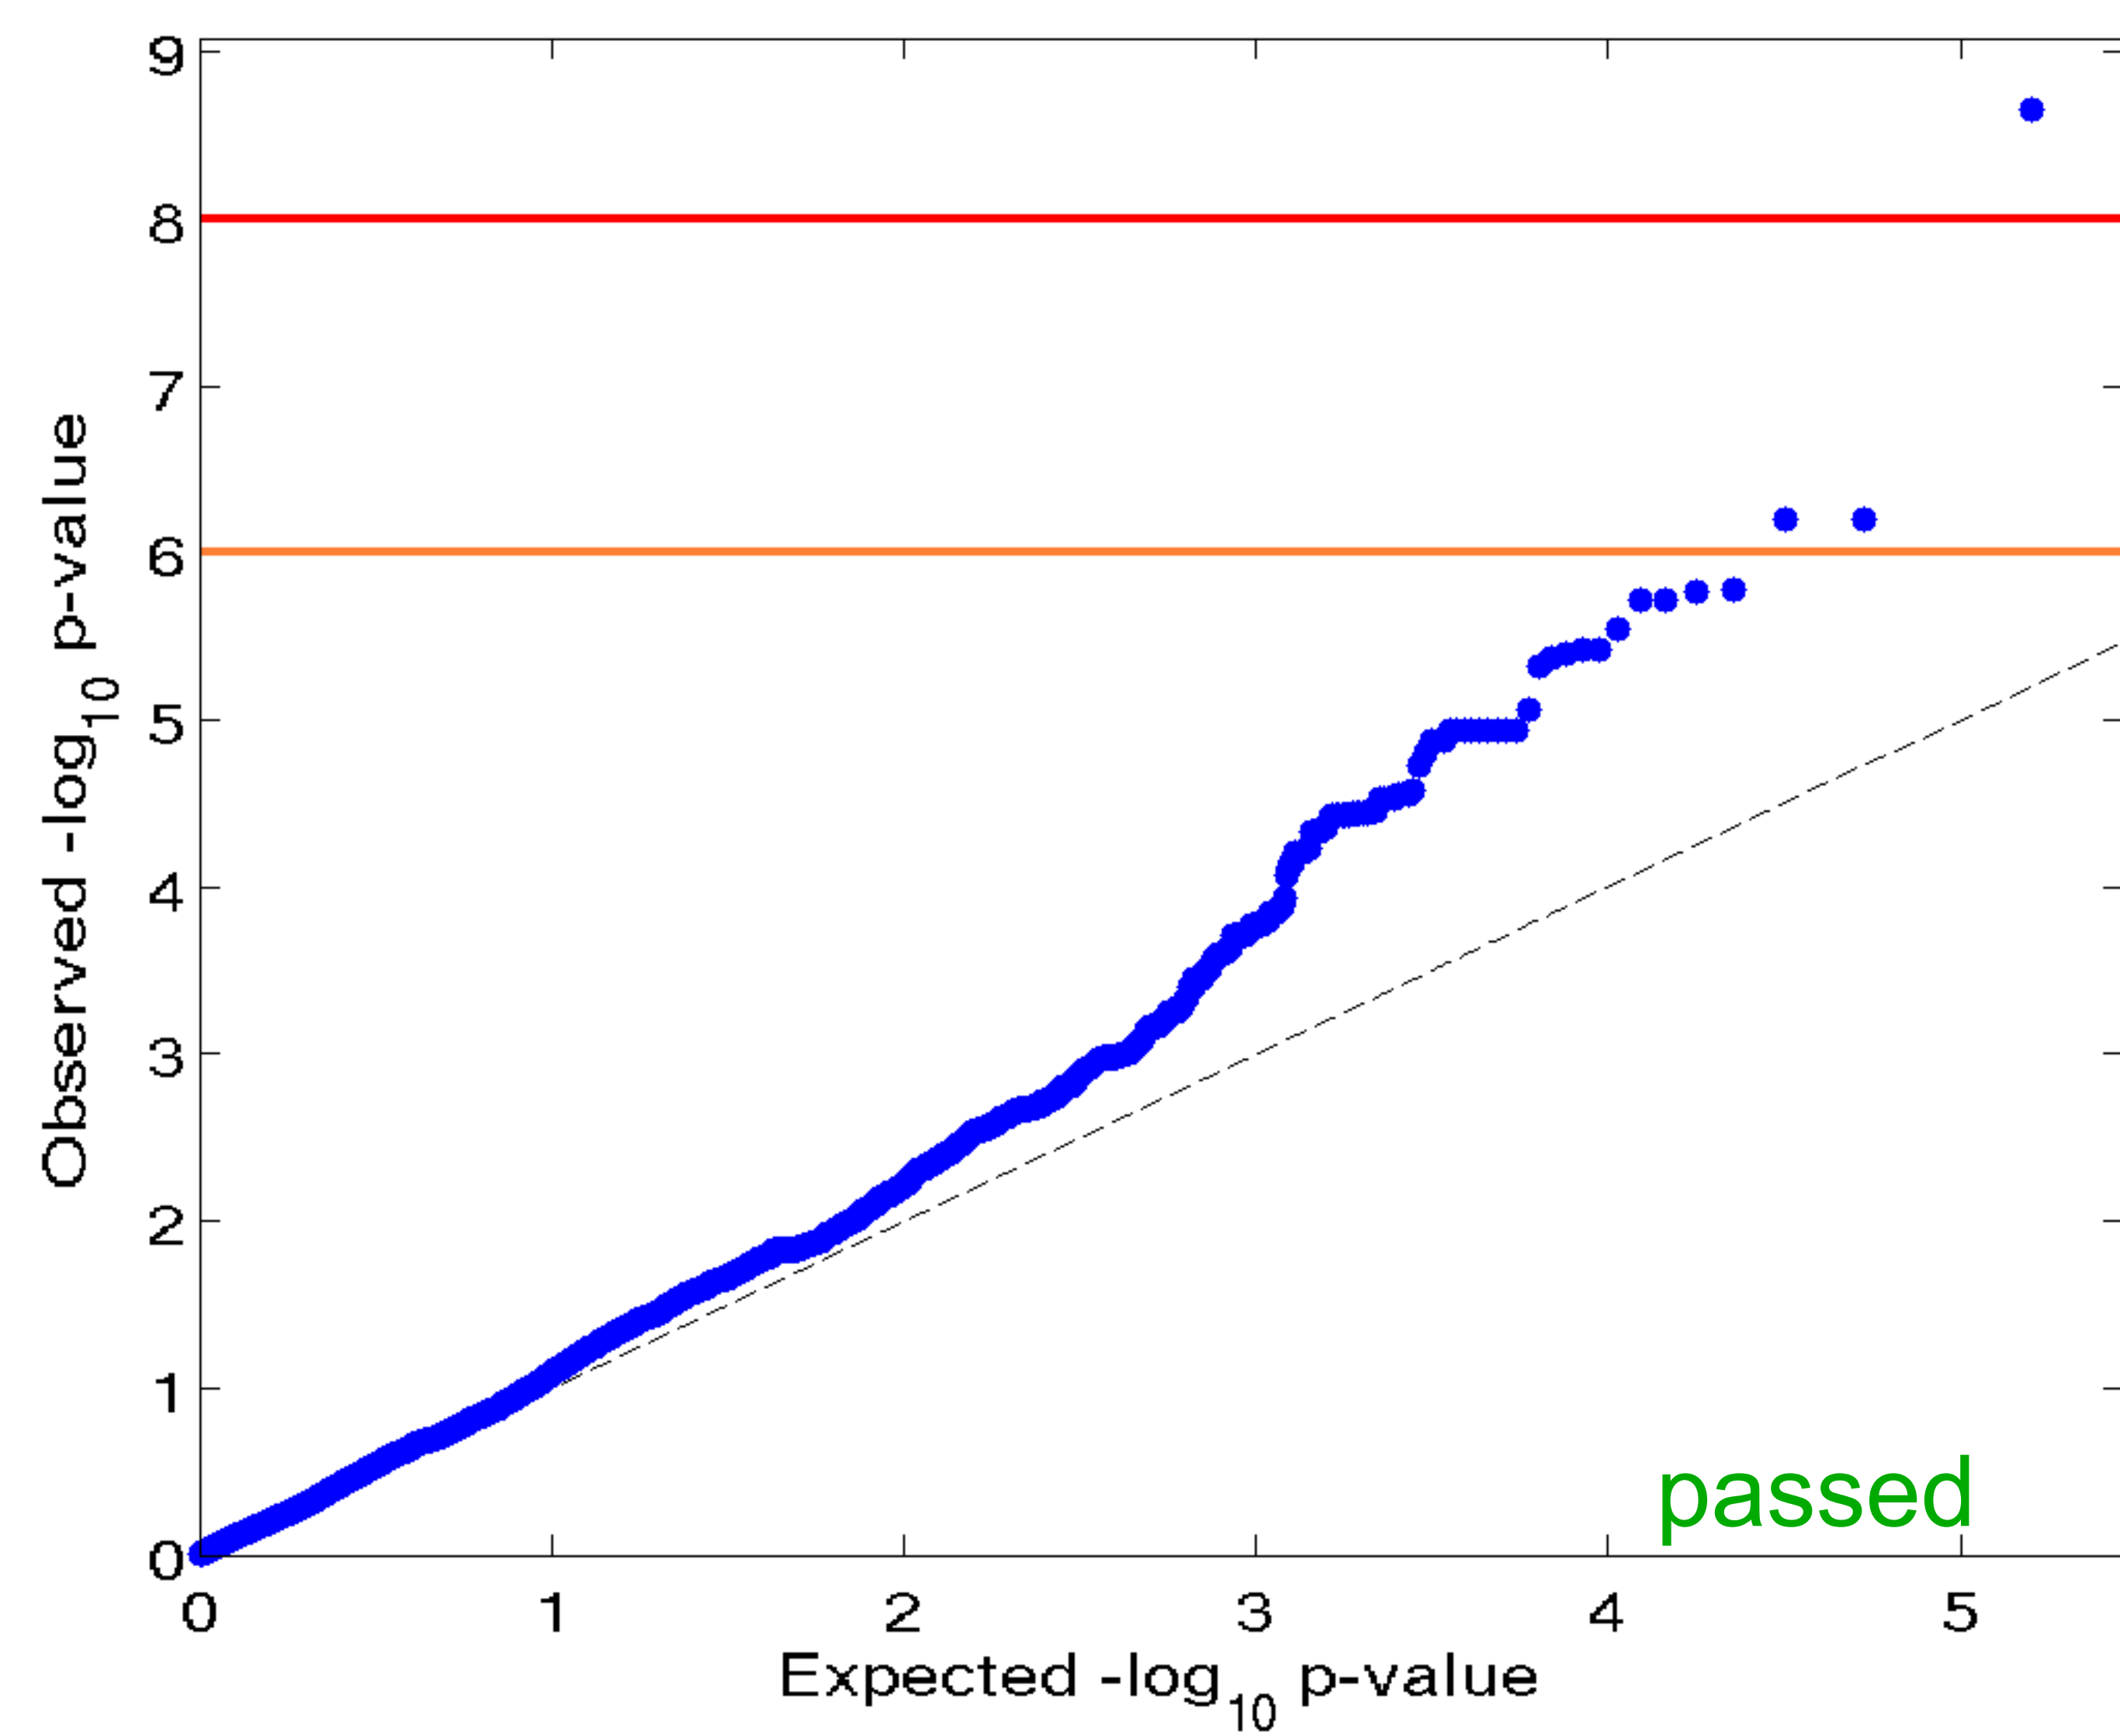



QT - iso10

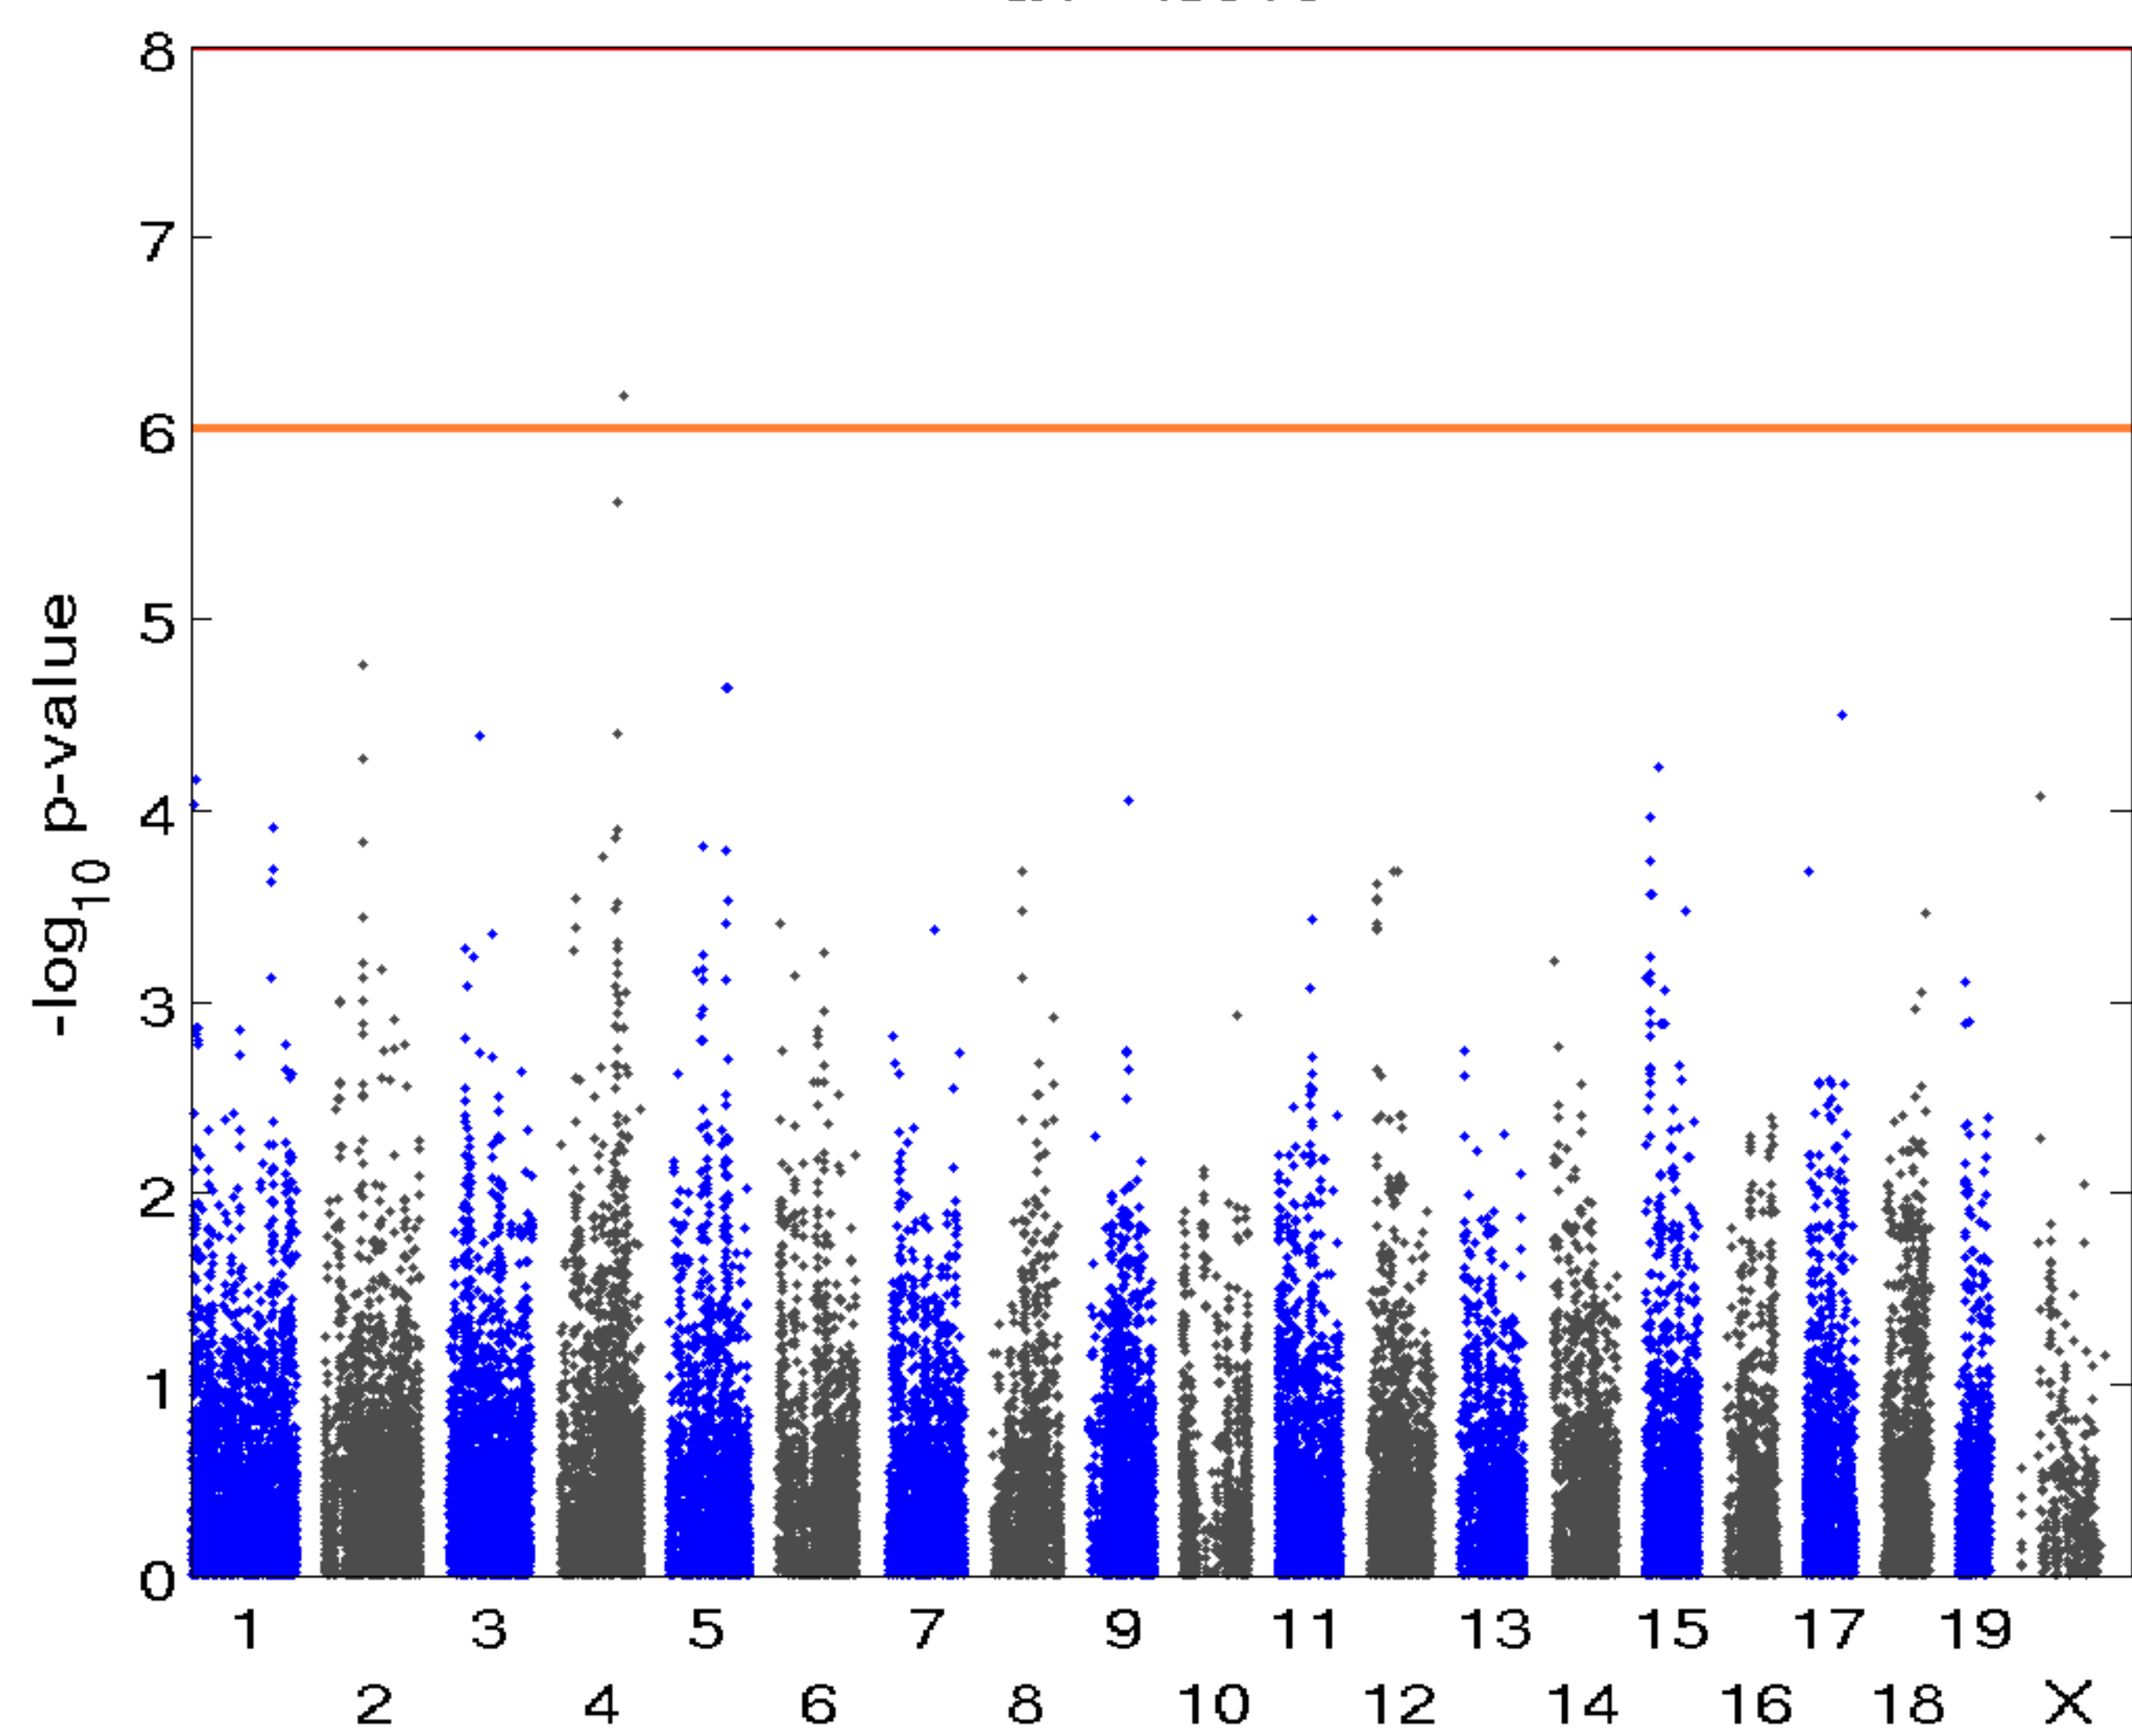

QT - iso10

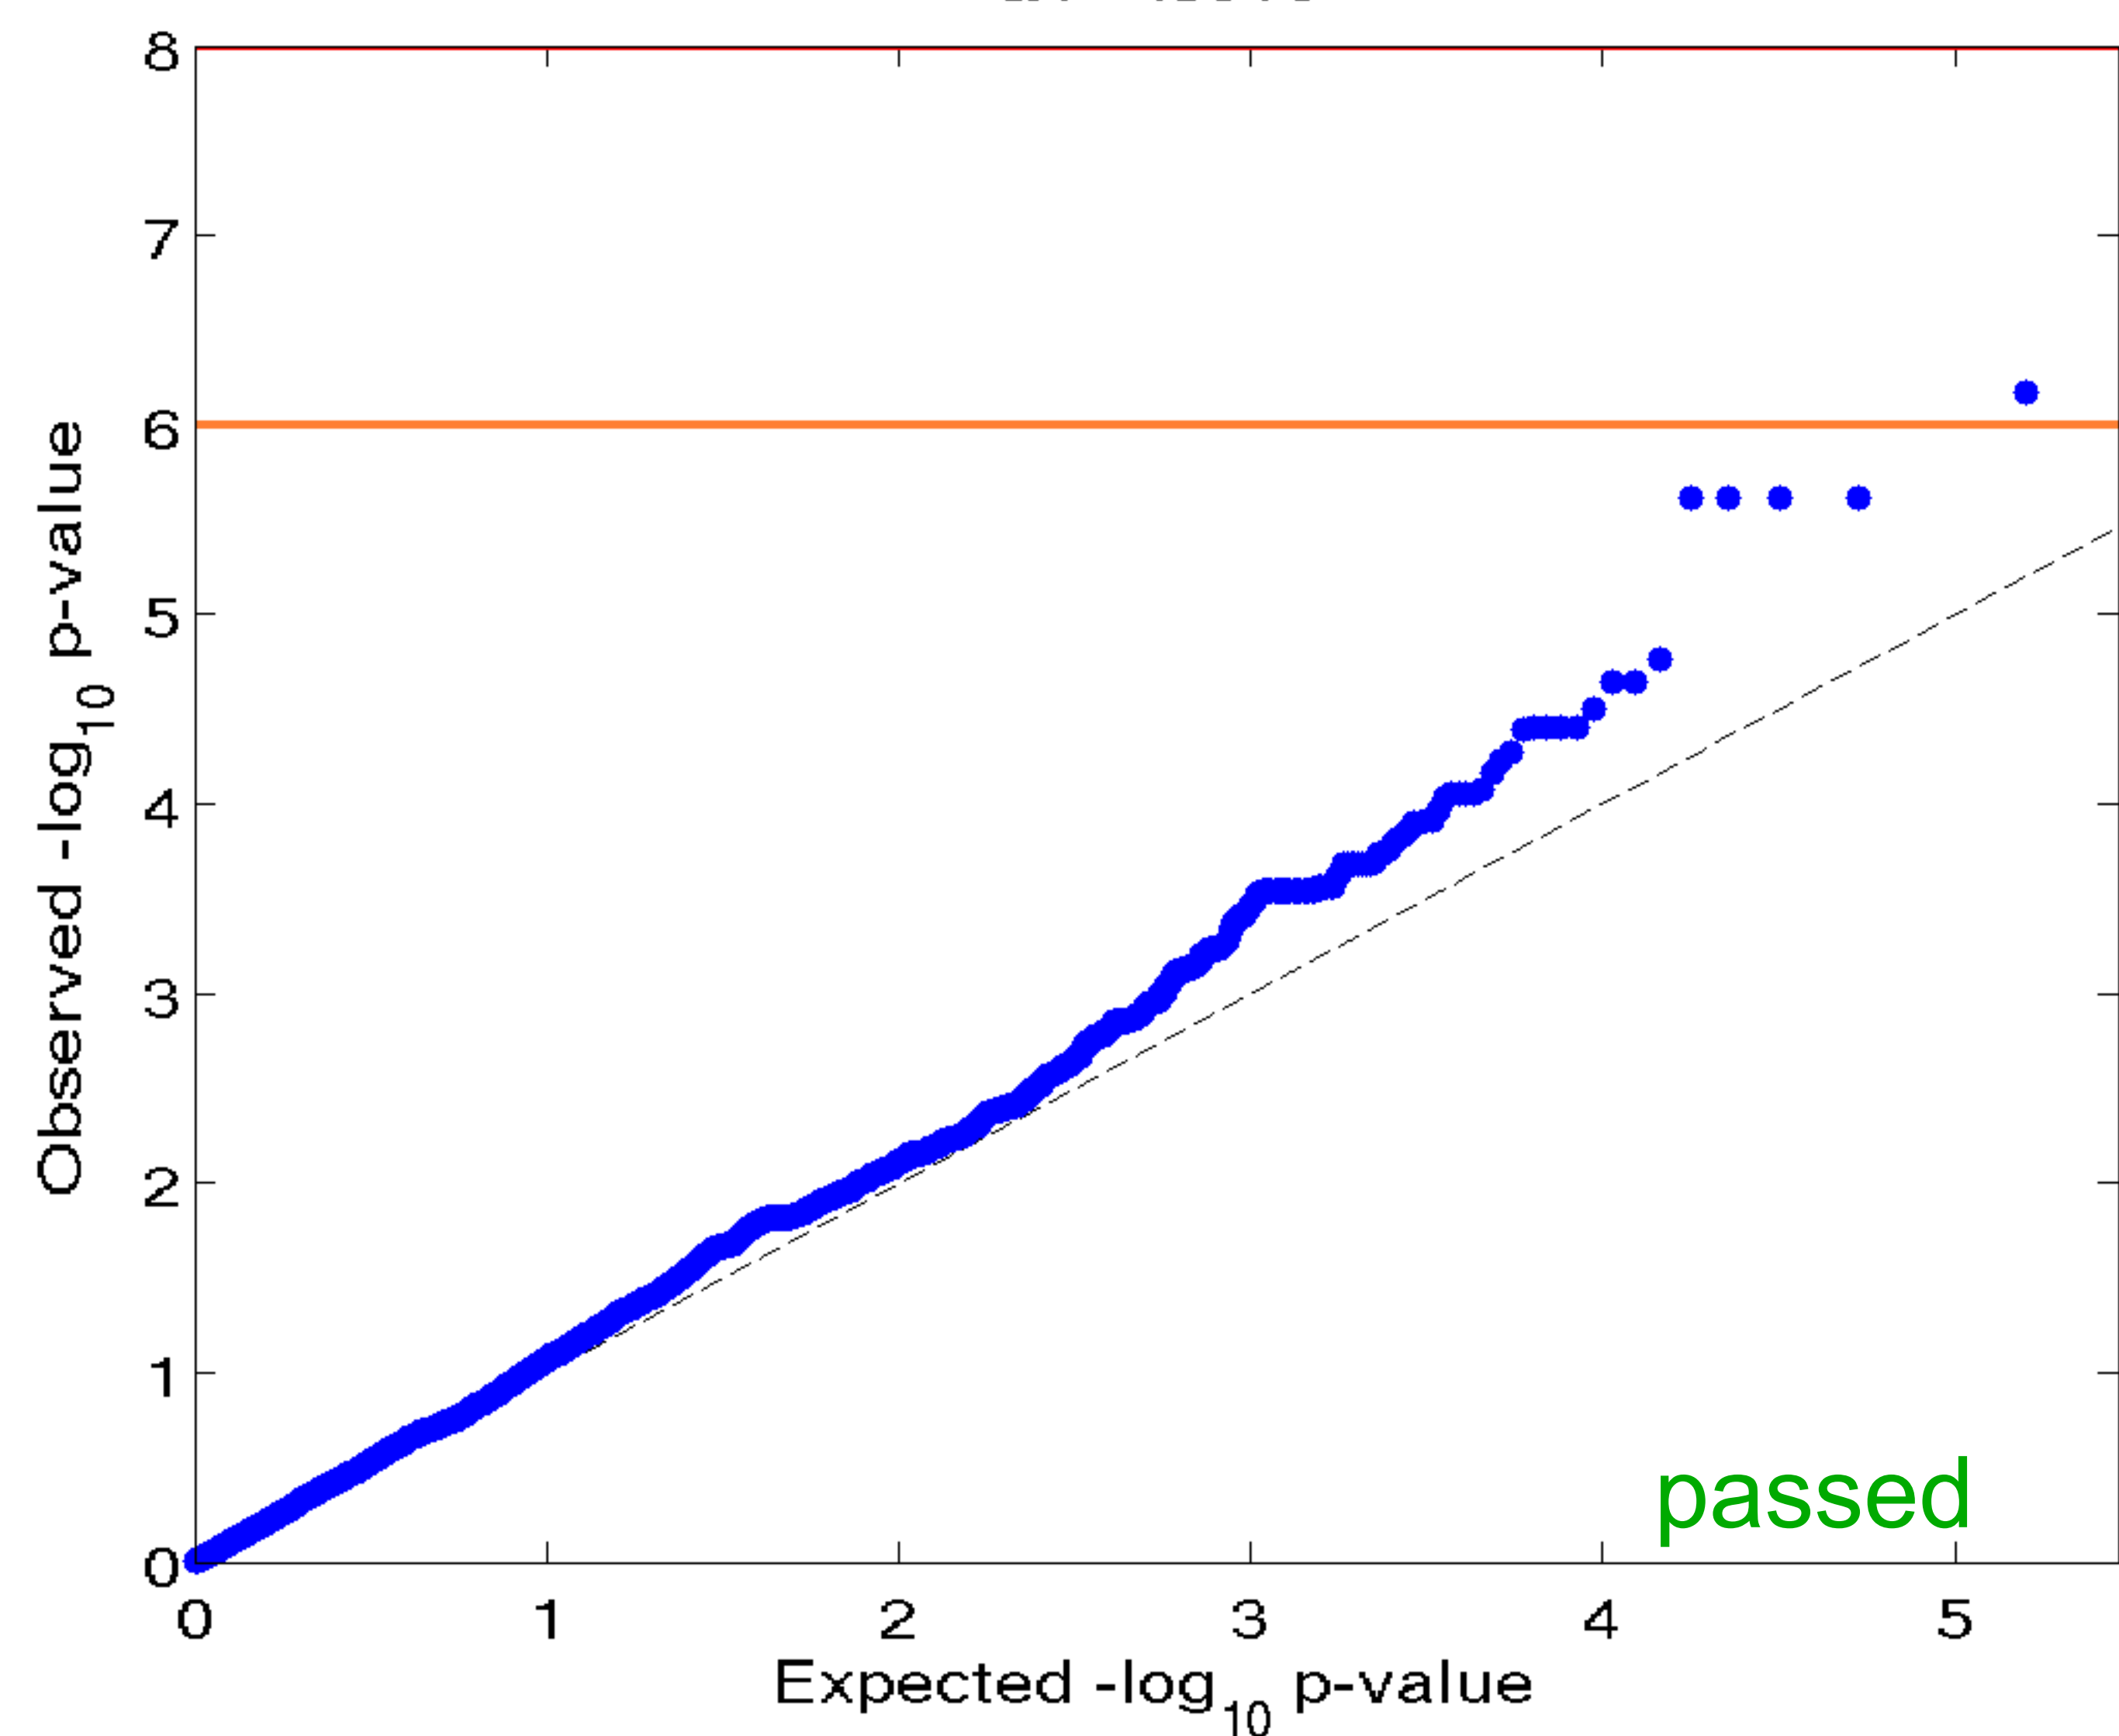

Ramp - iso10

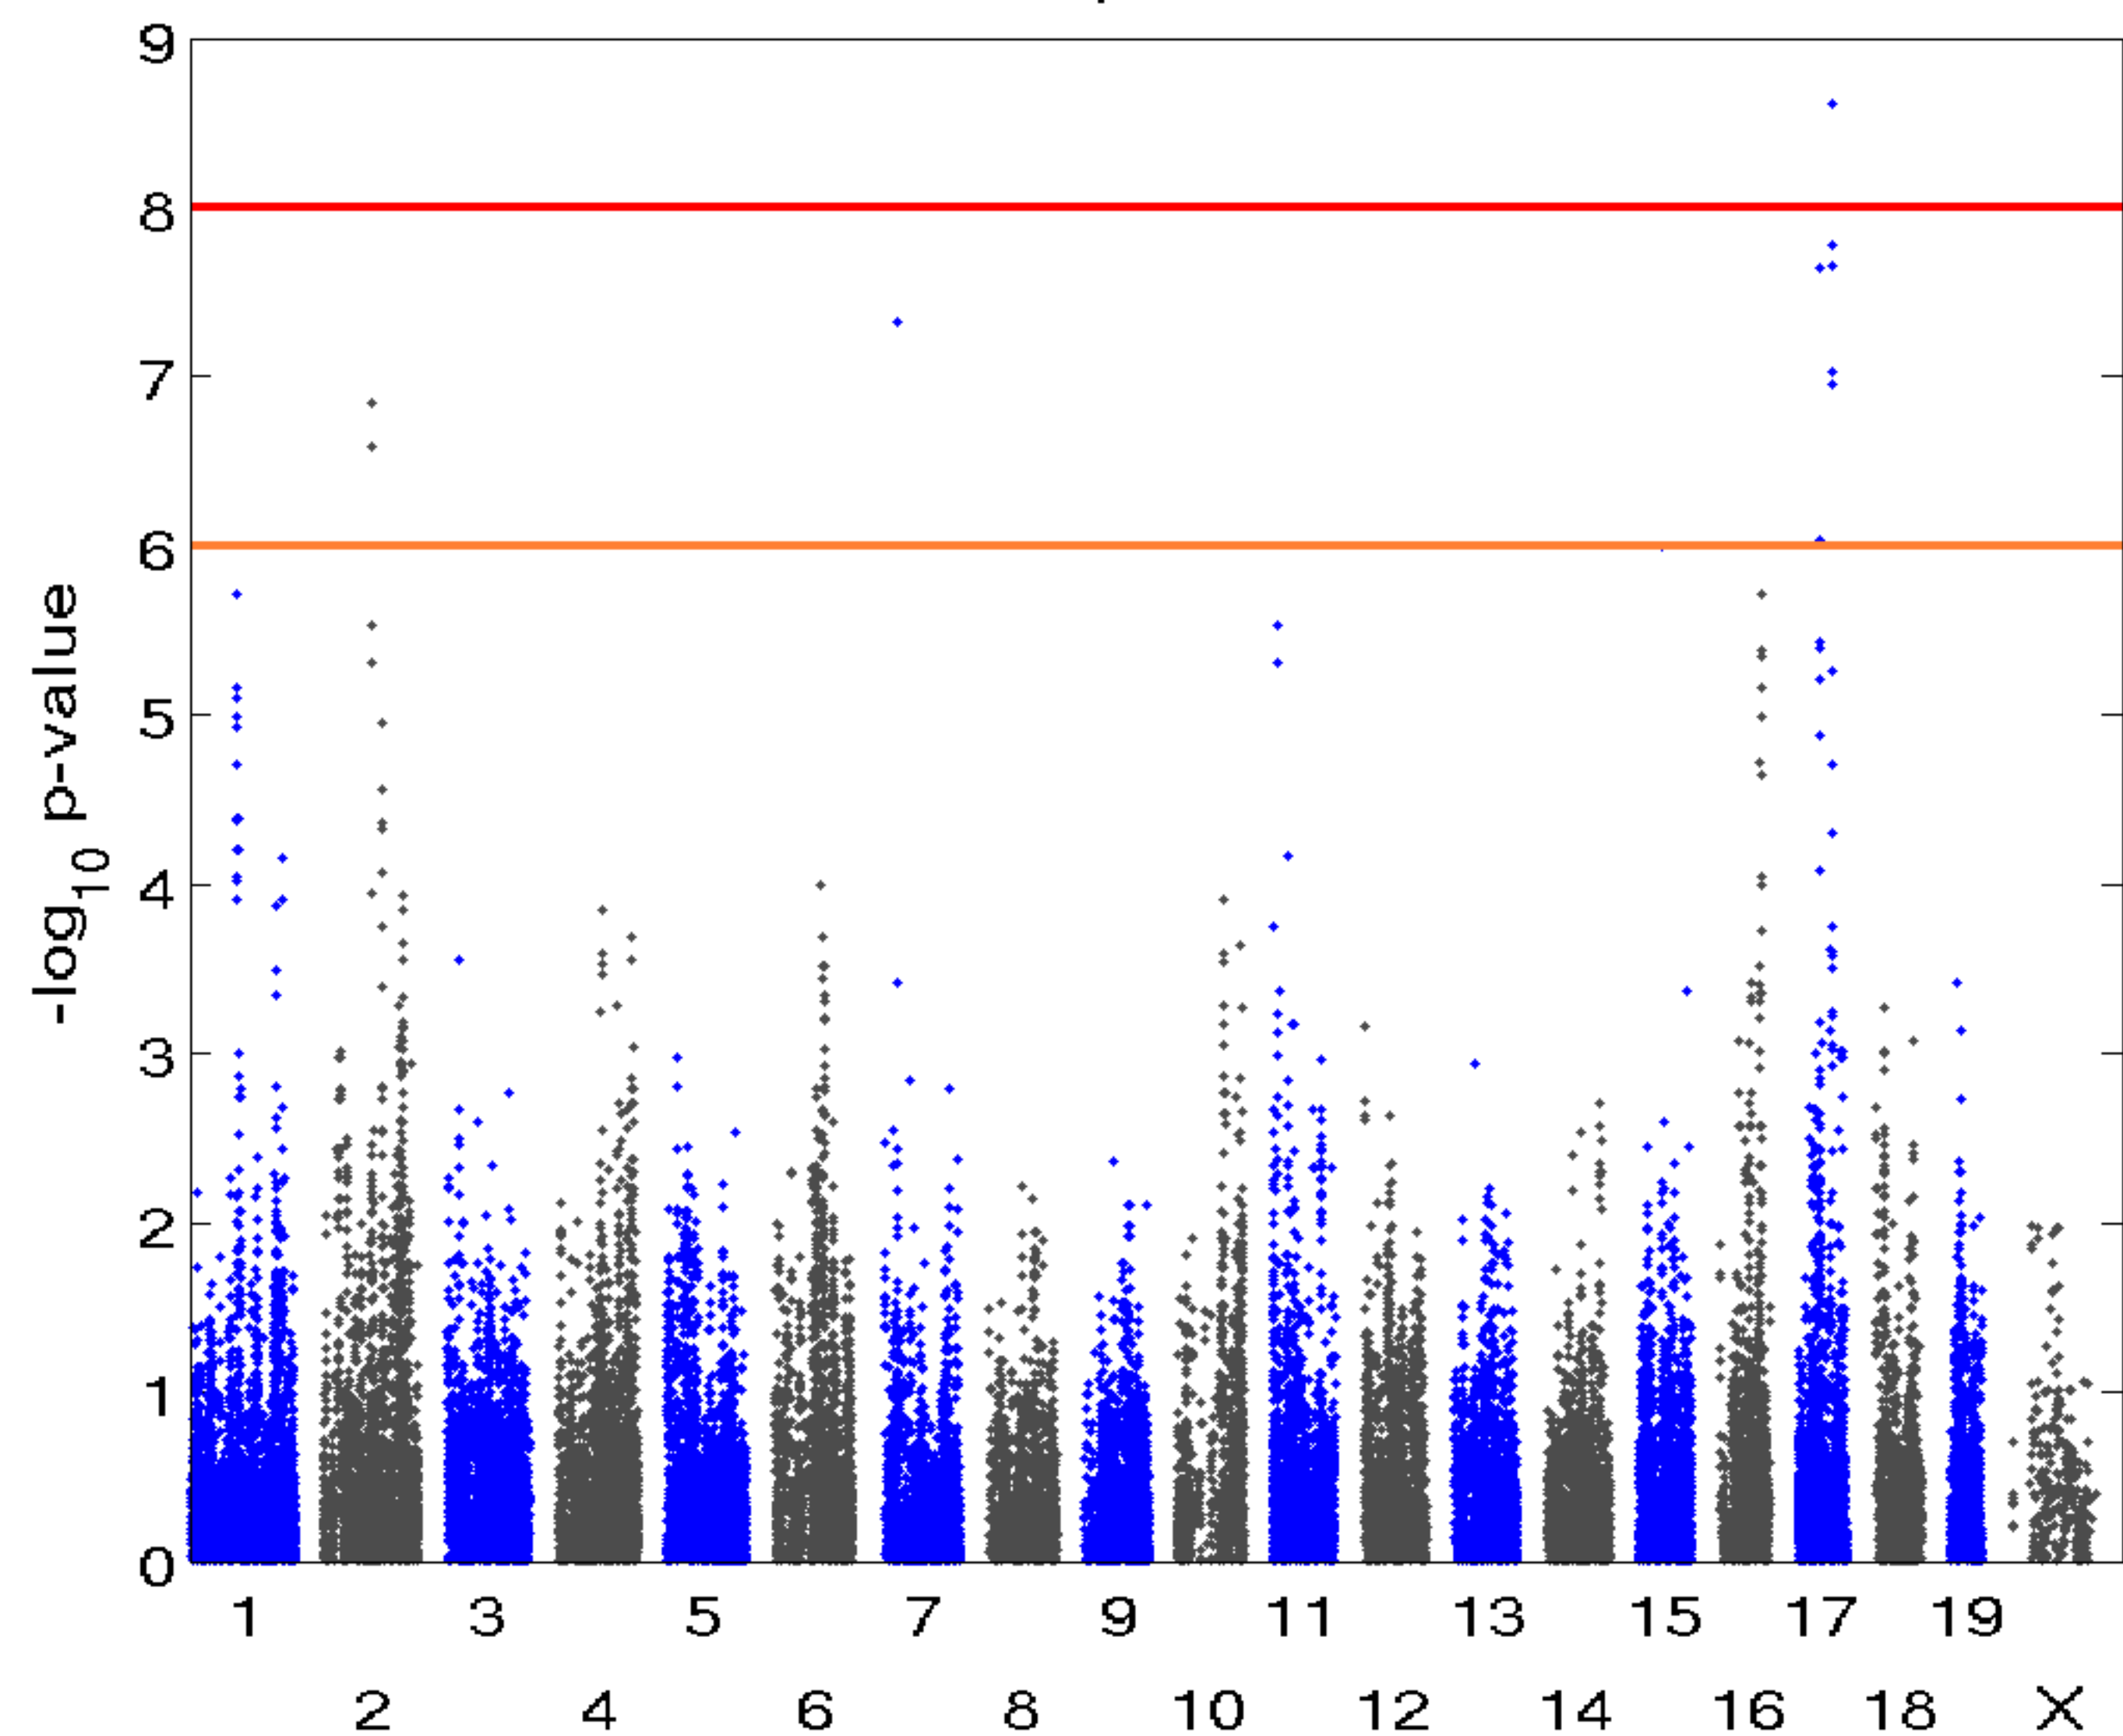

Ramp - iso10

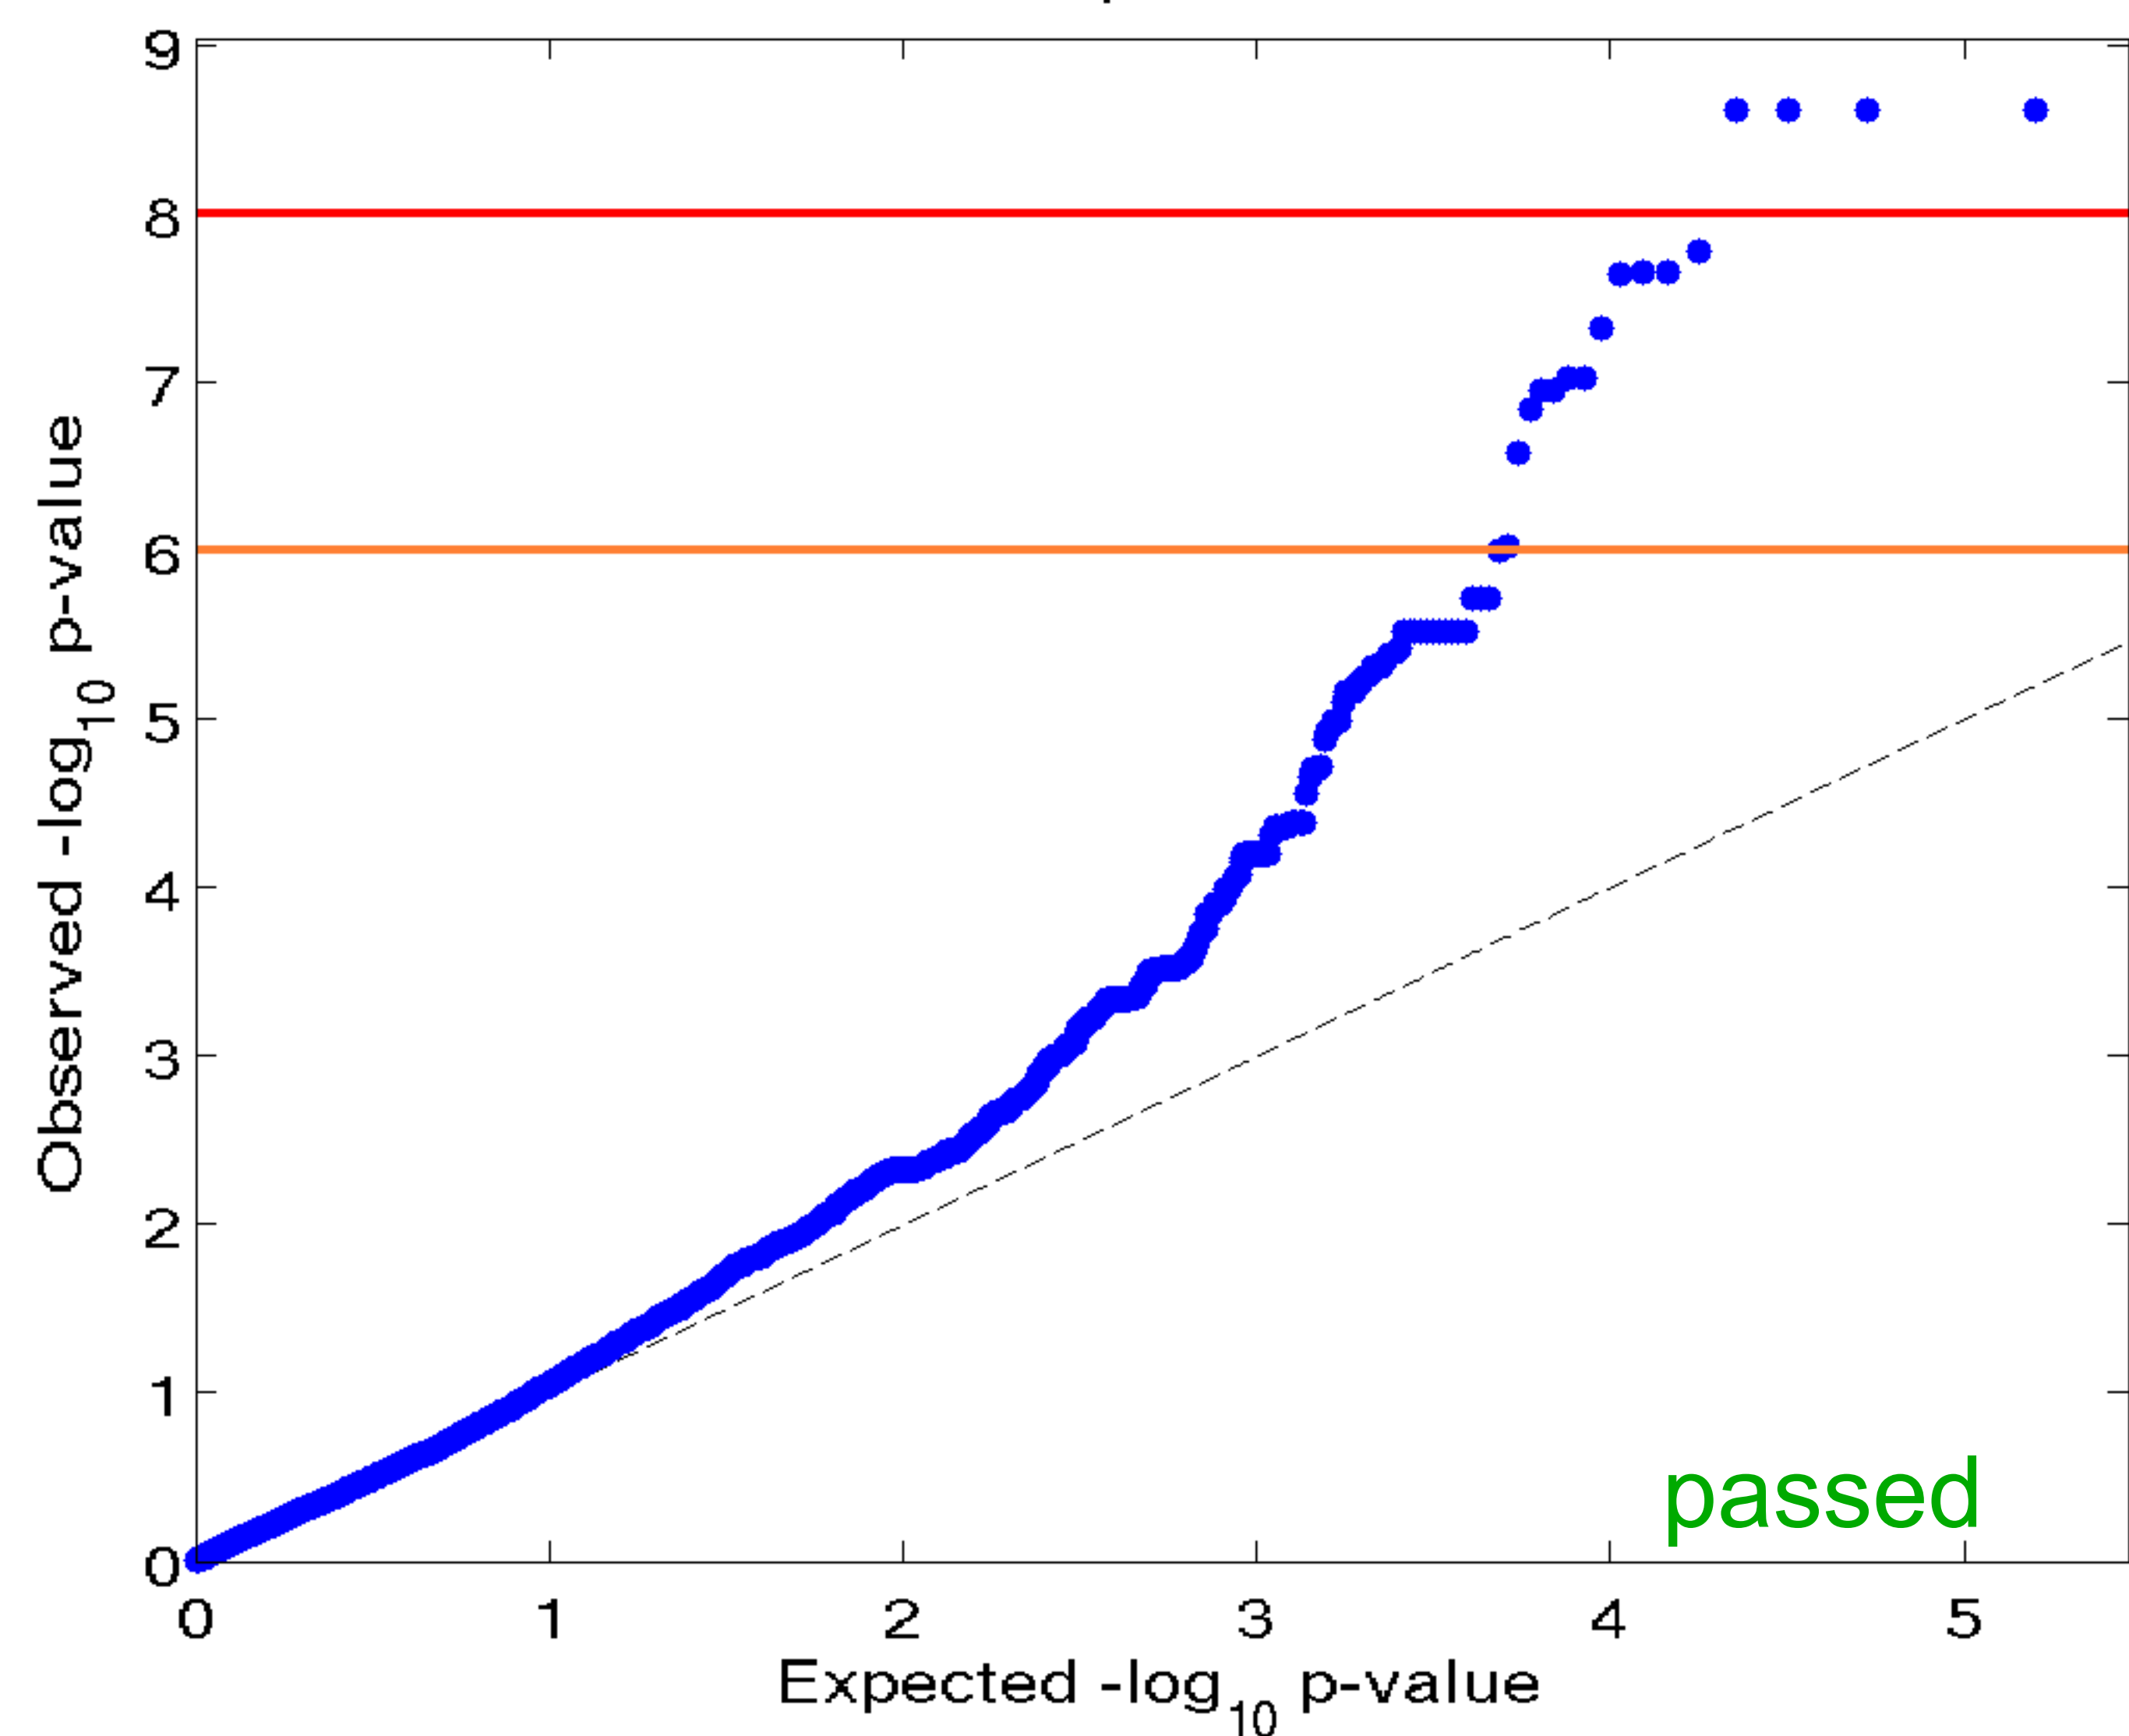

RR - iso10

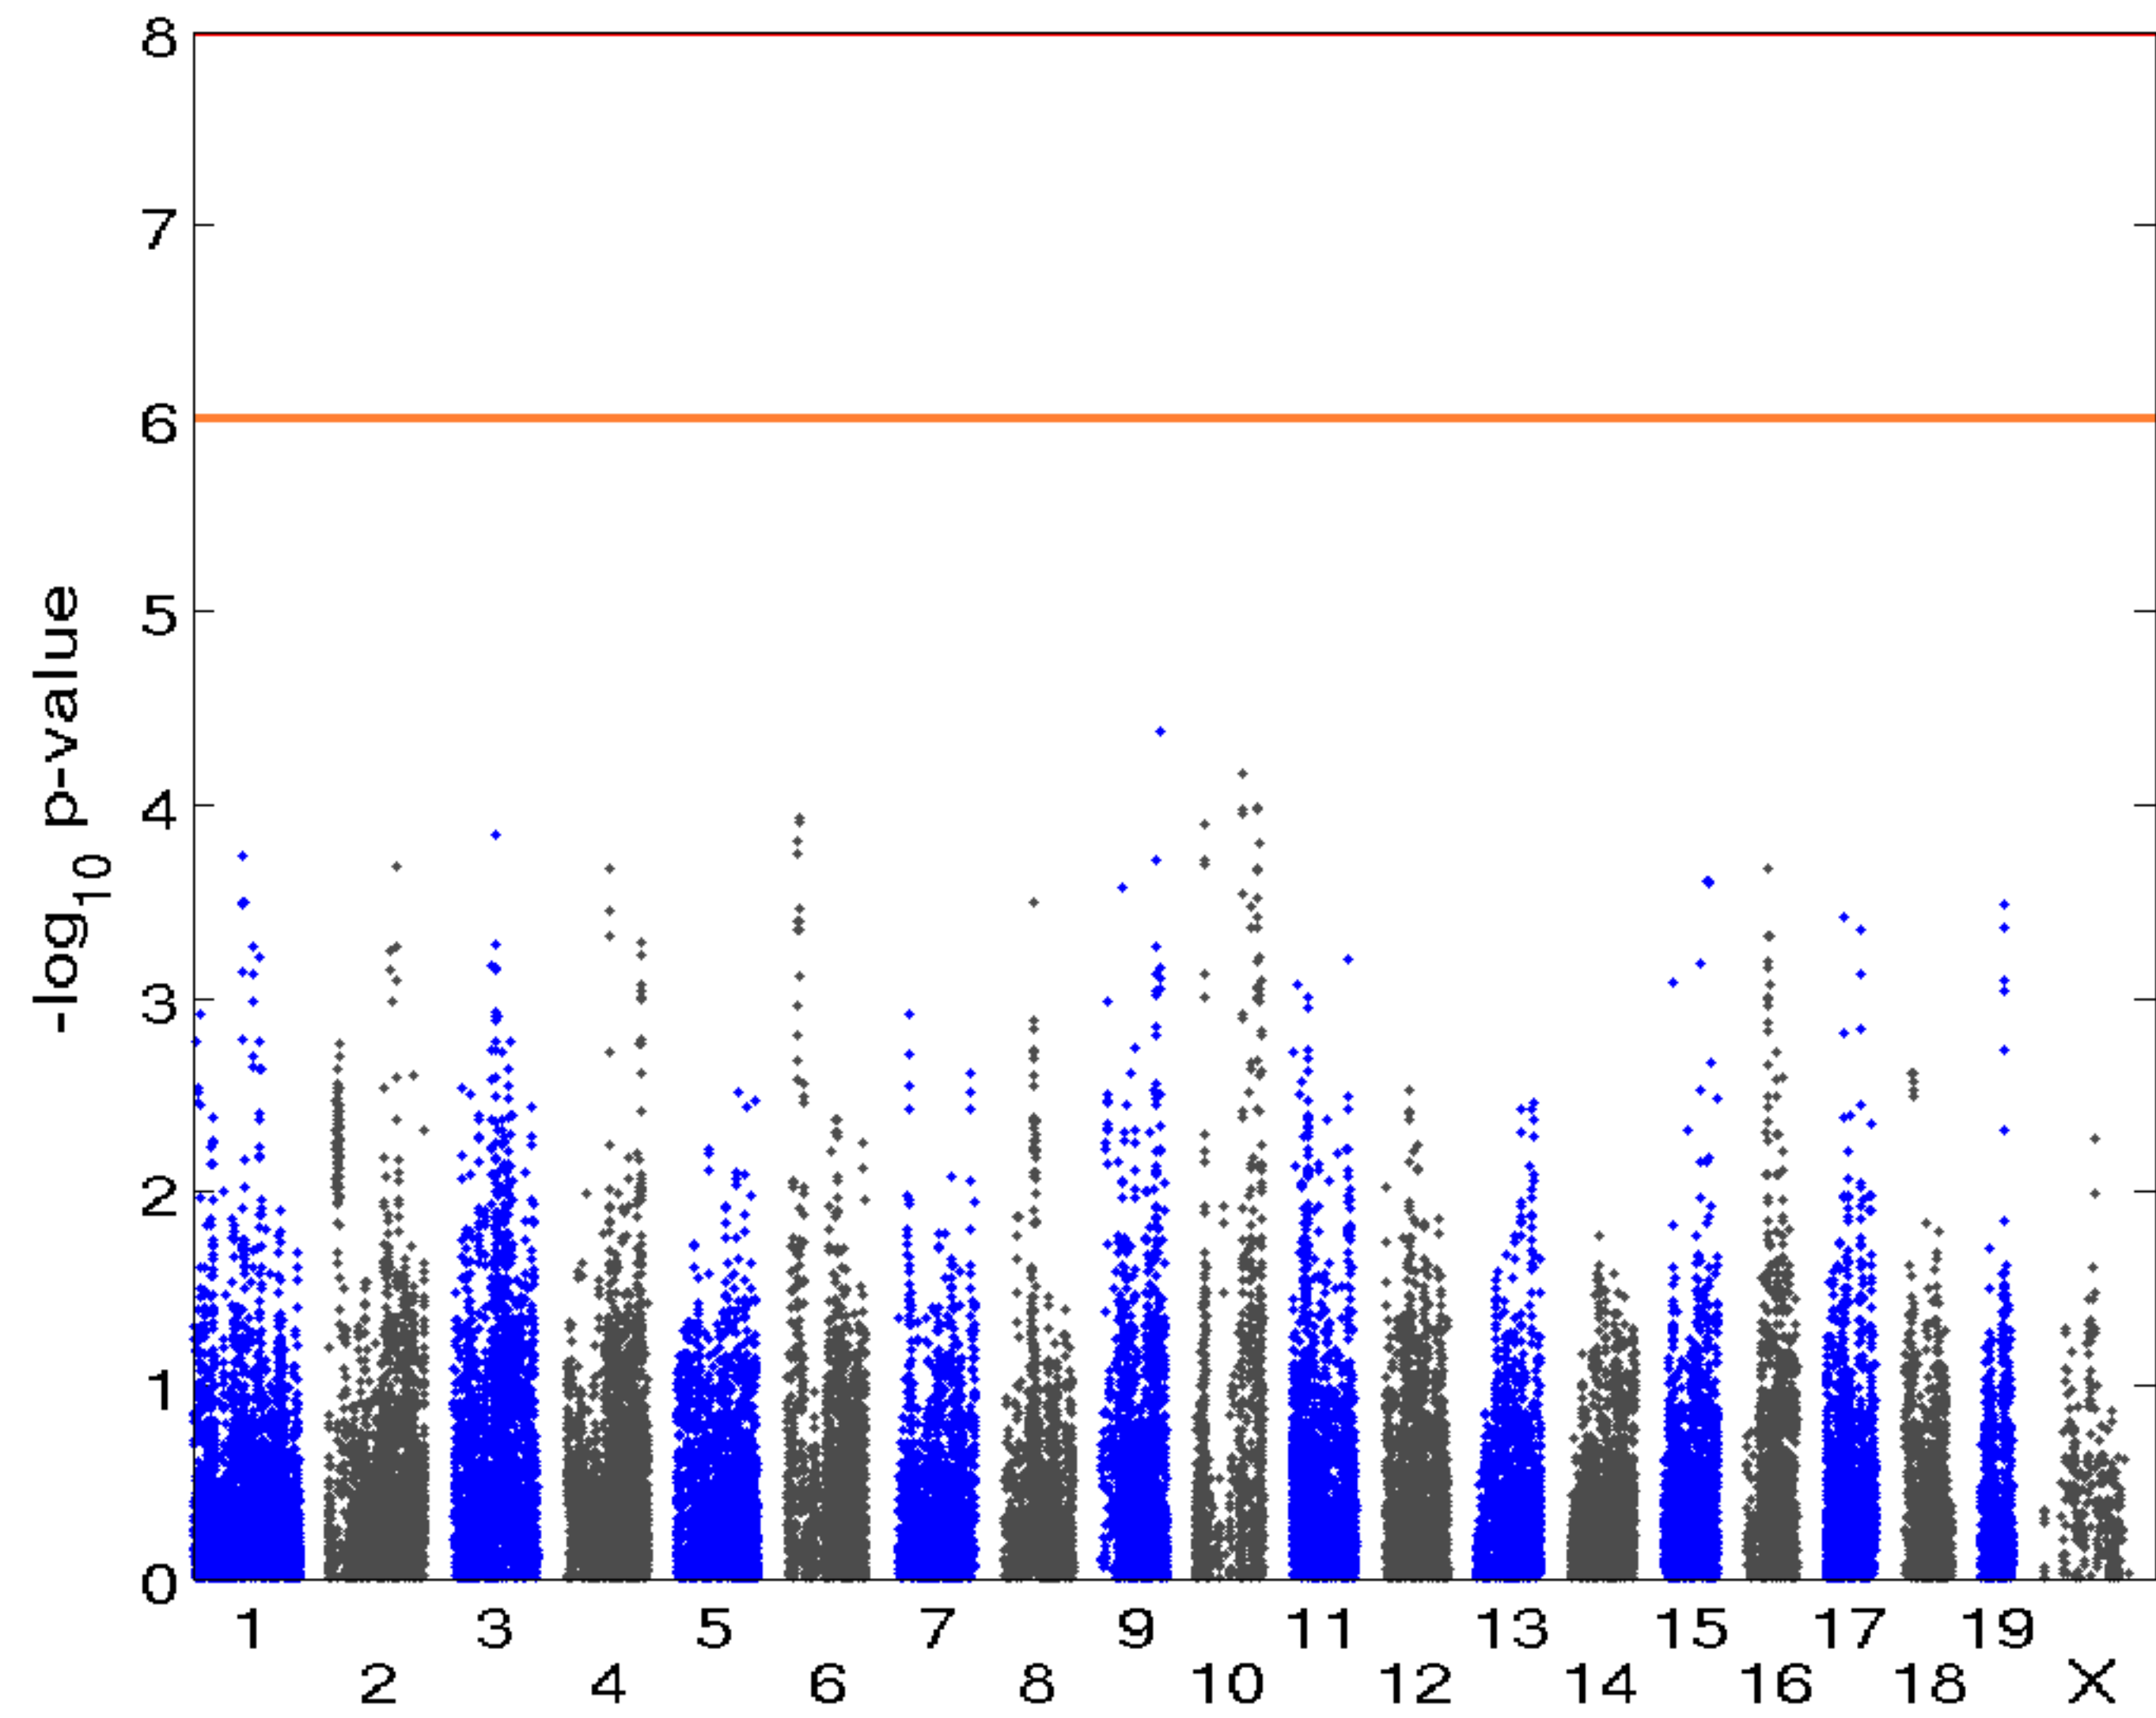

RR - iso10

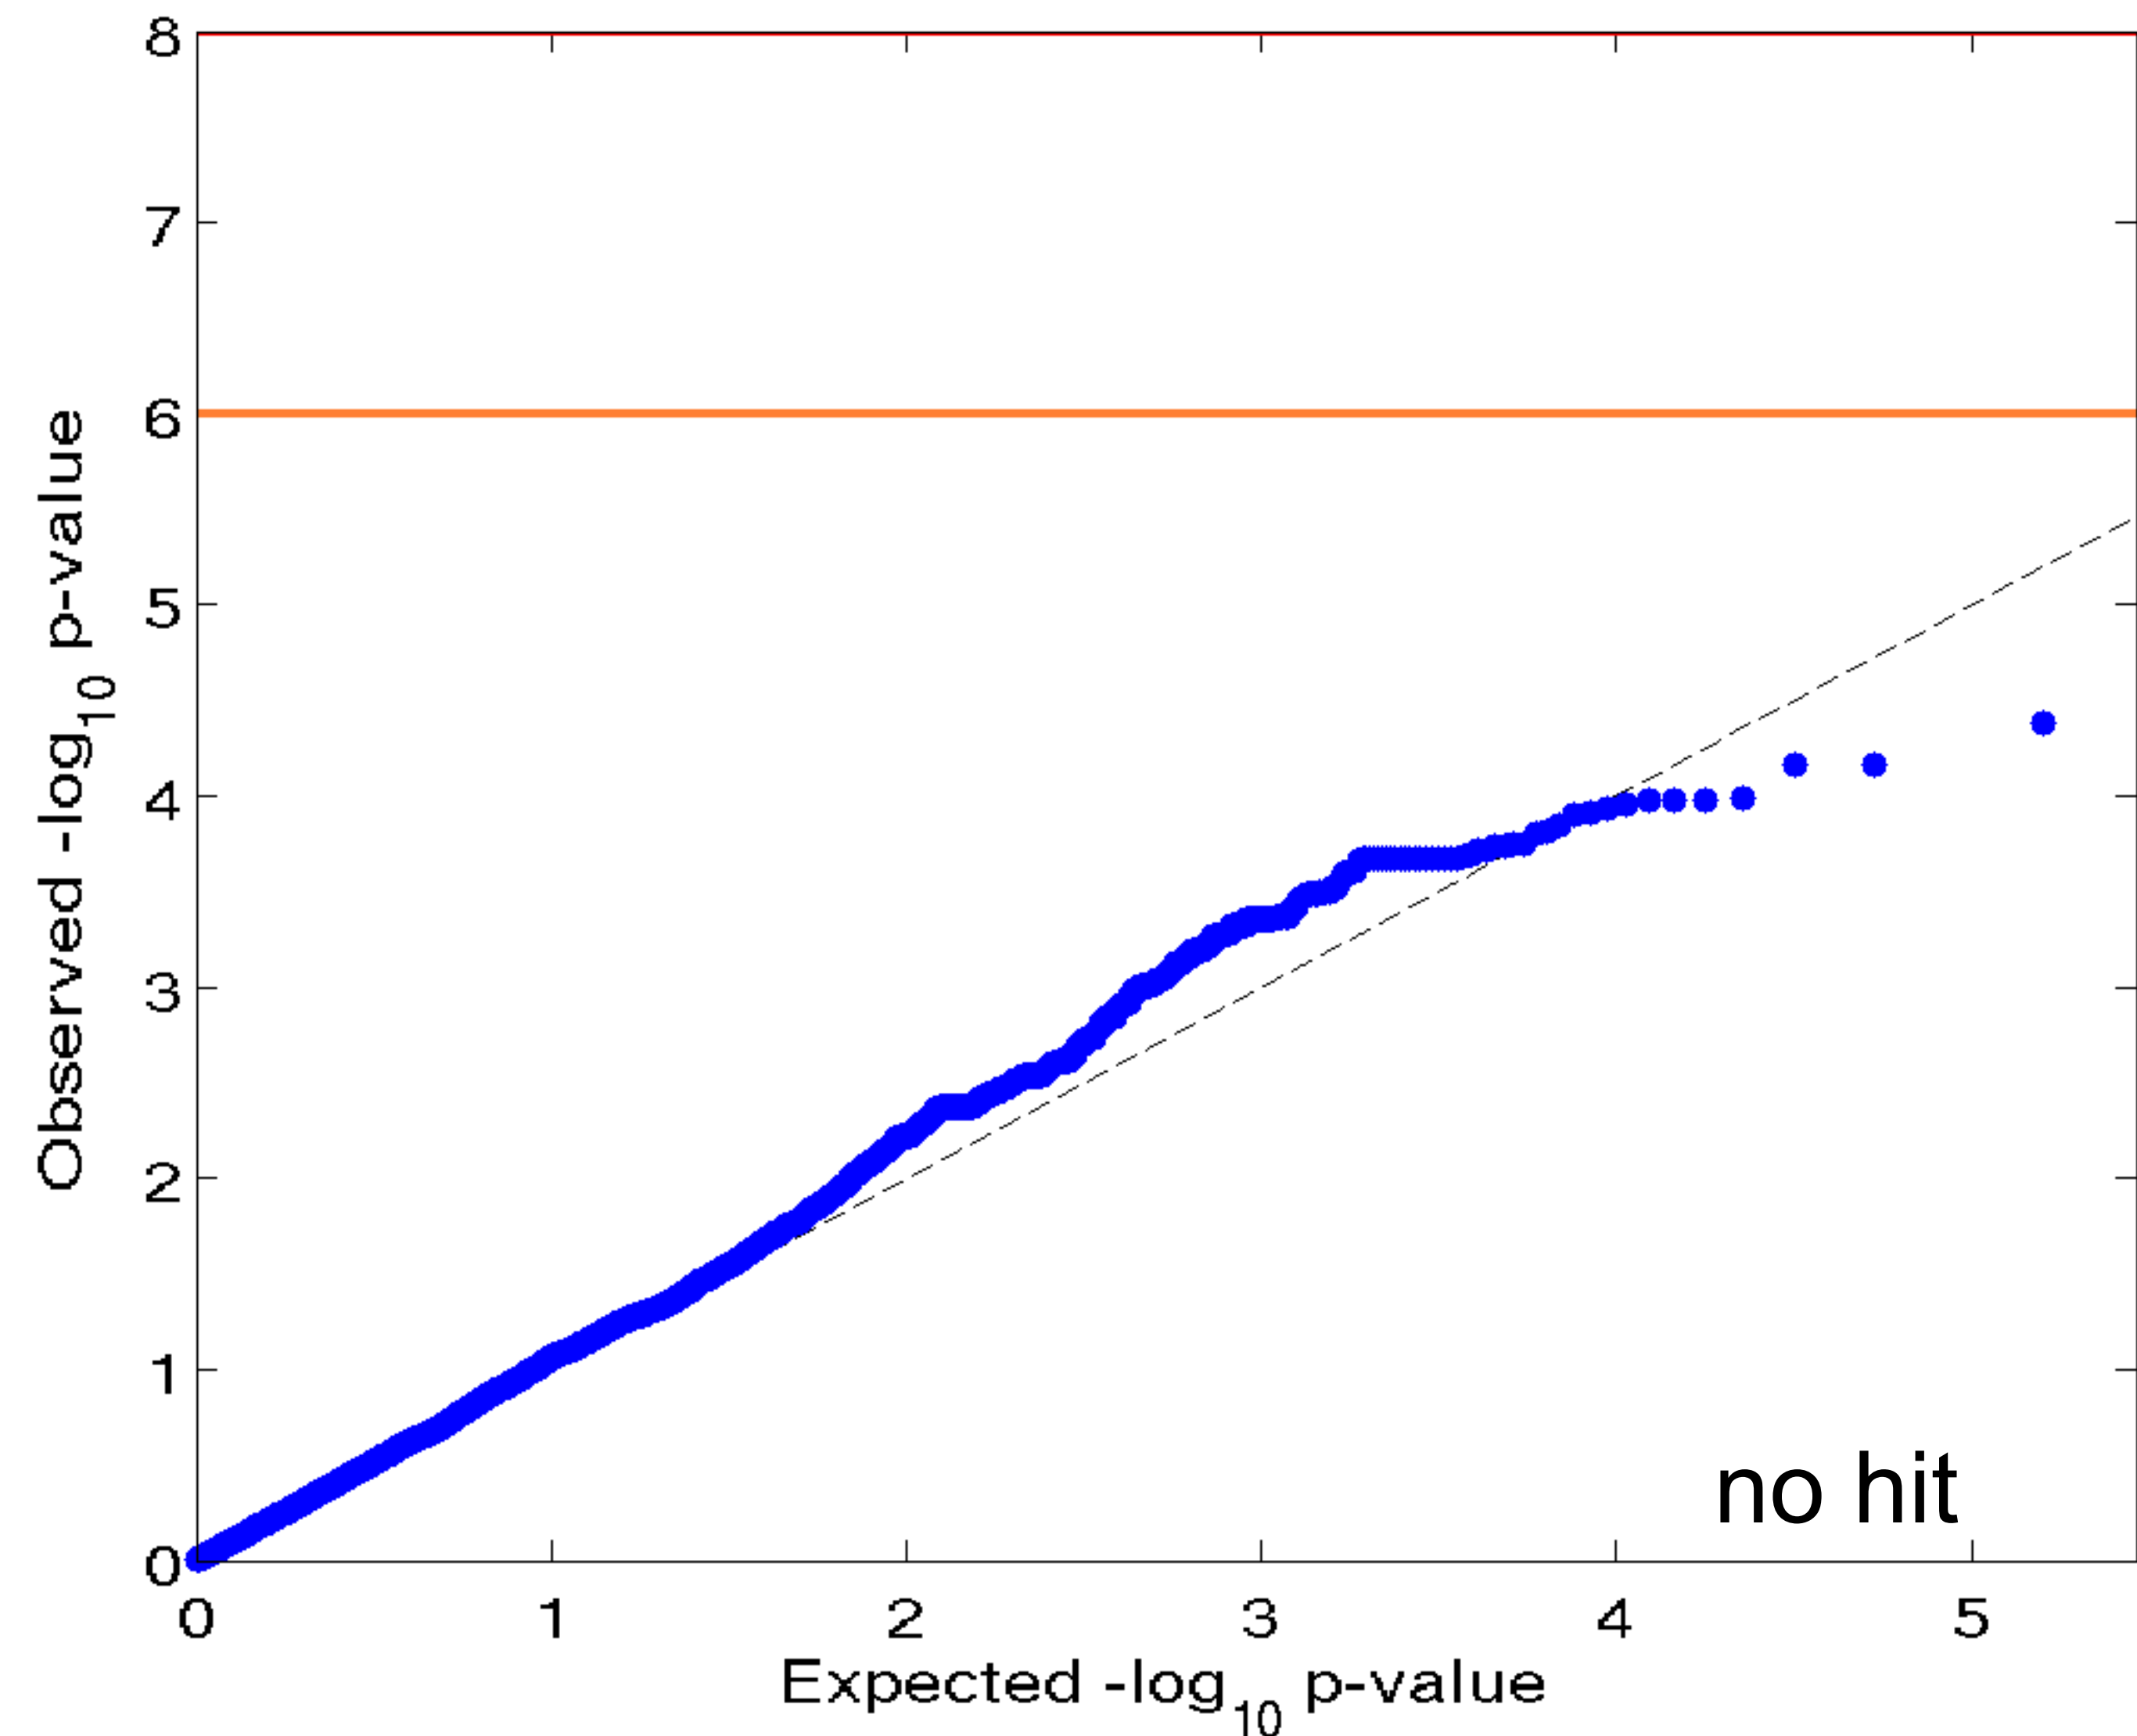

Samp - iso10

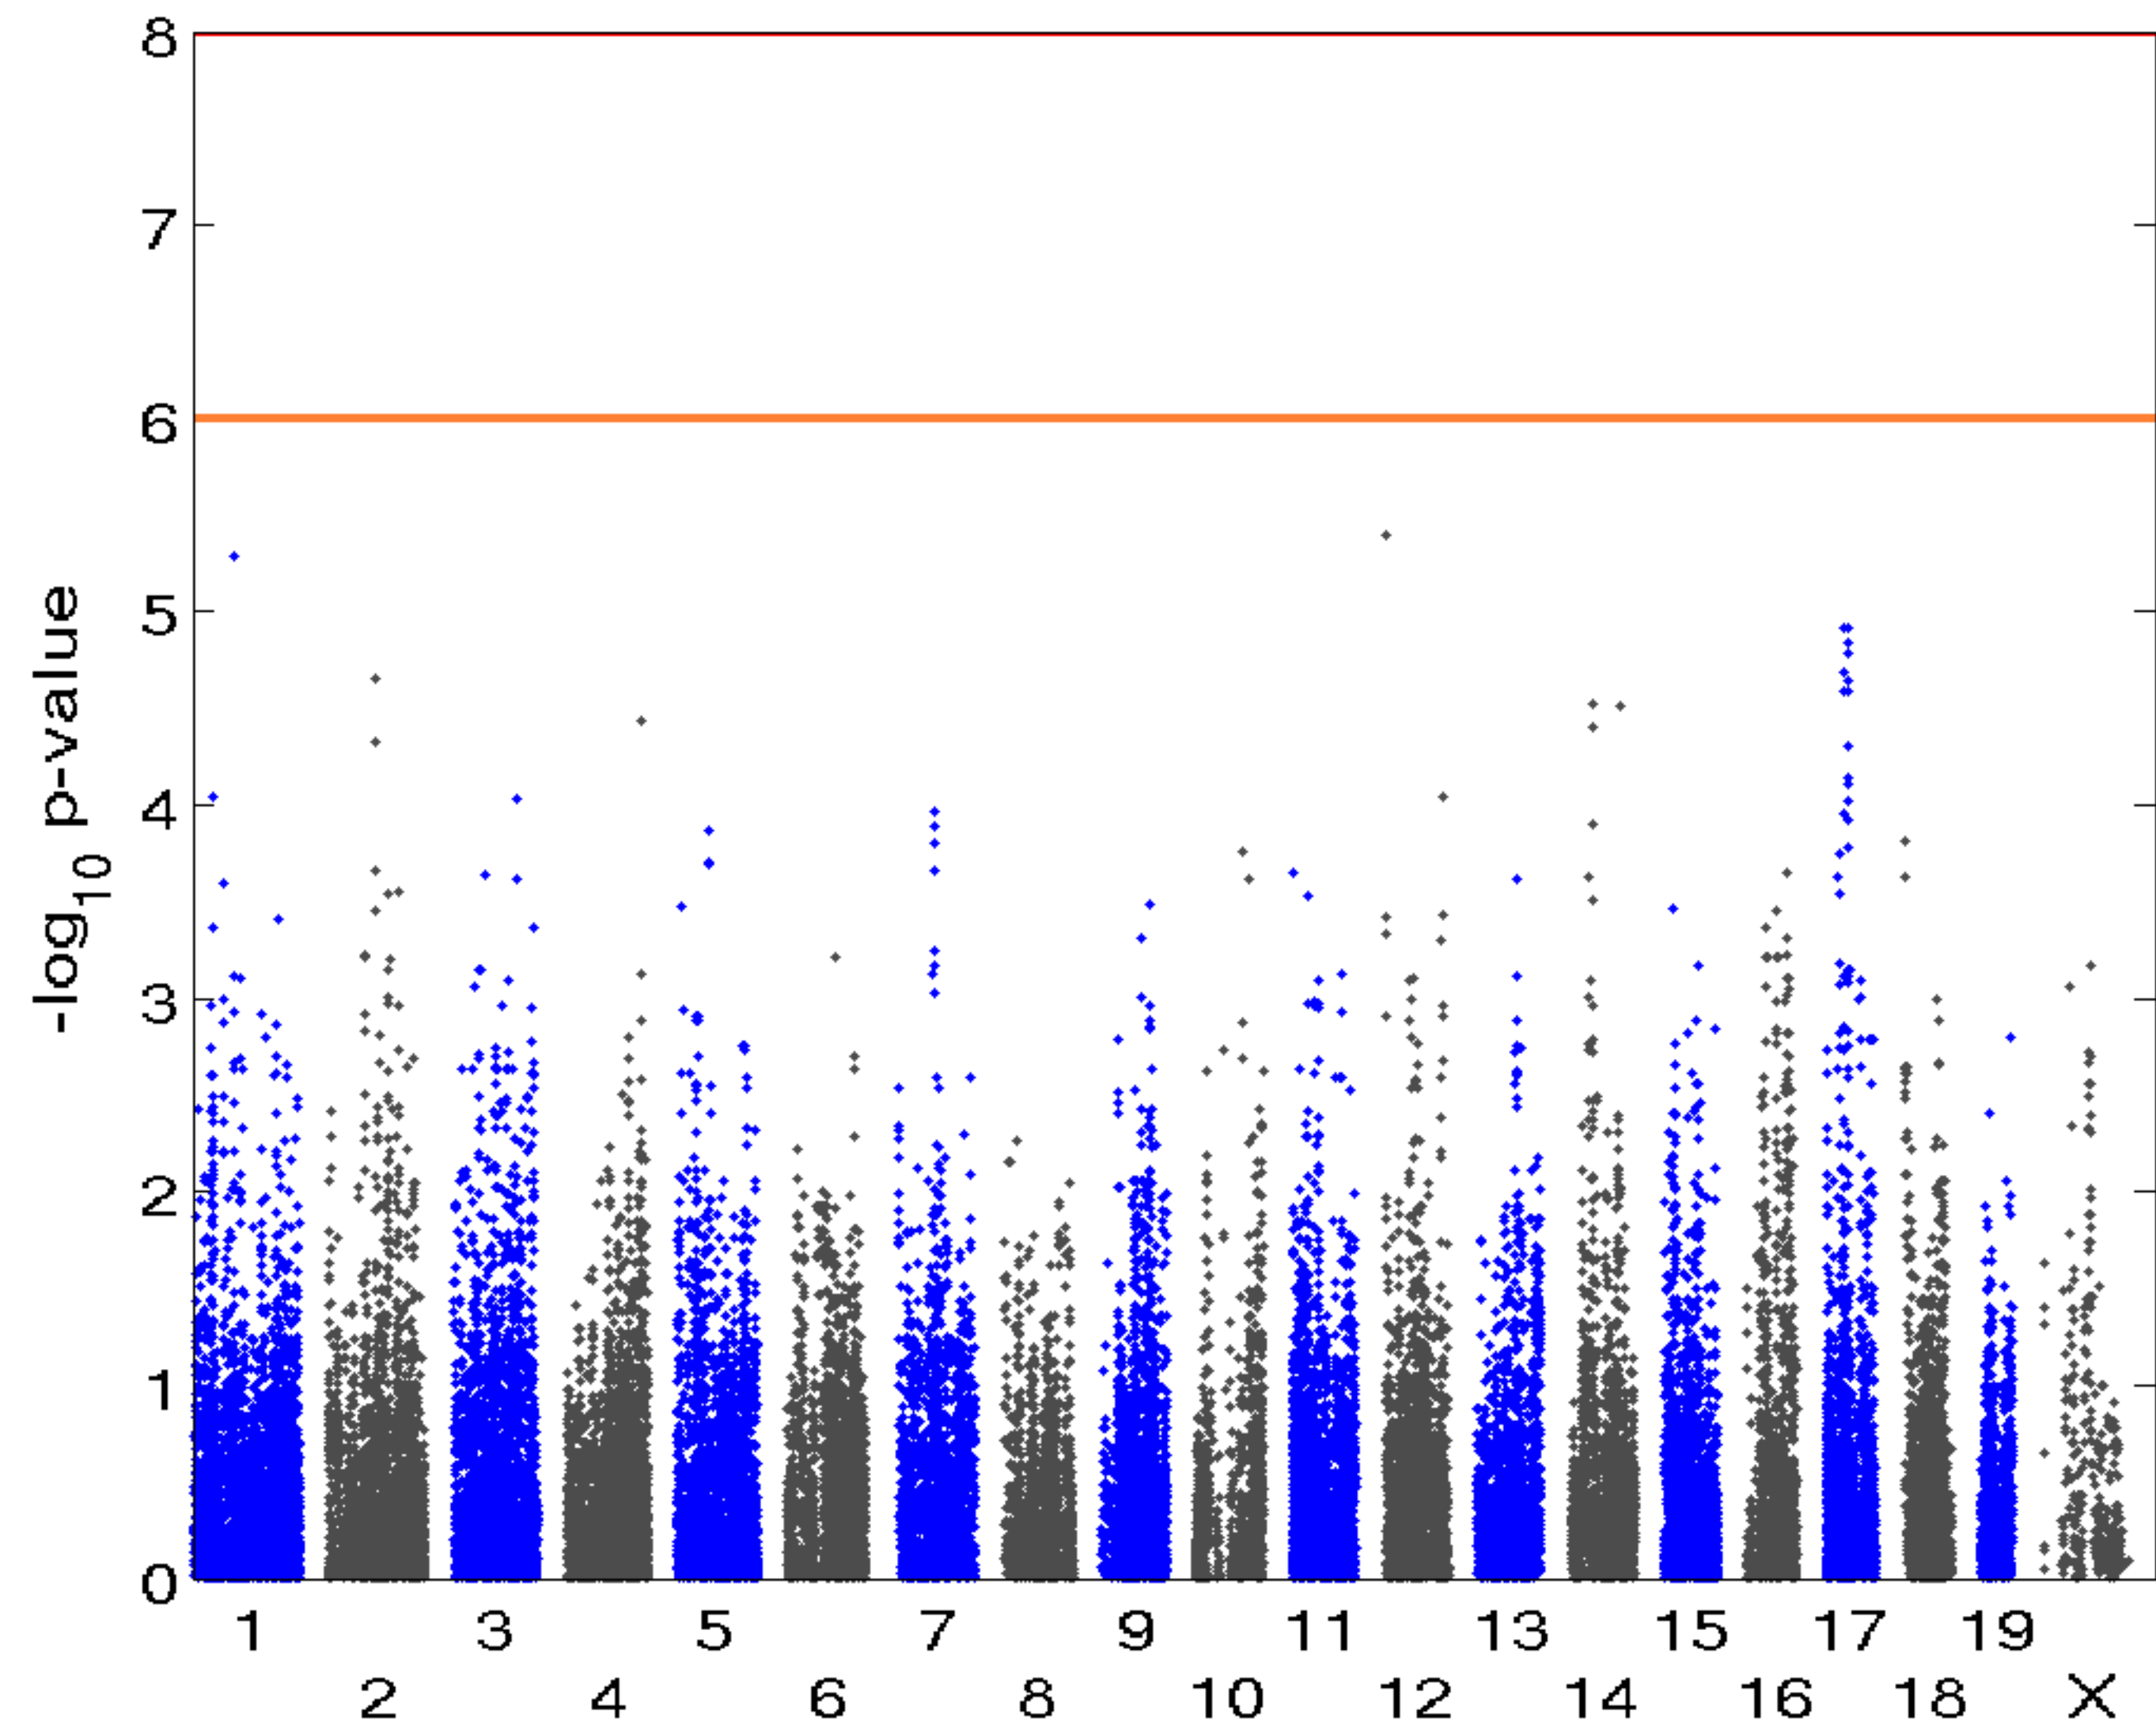

Samp - iso10

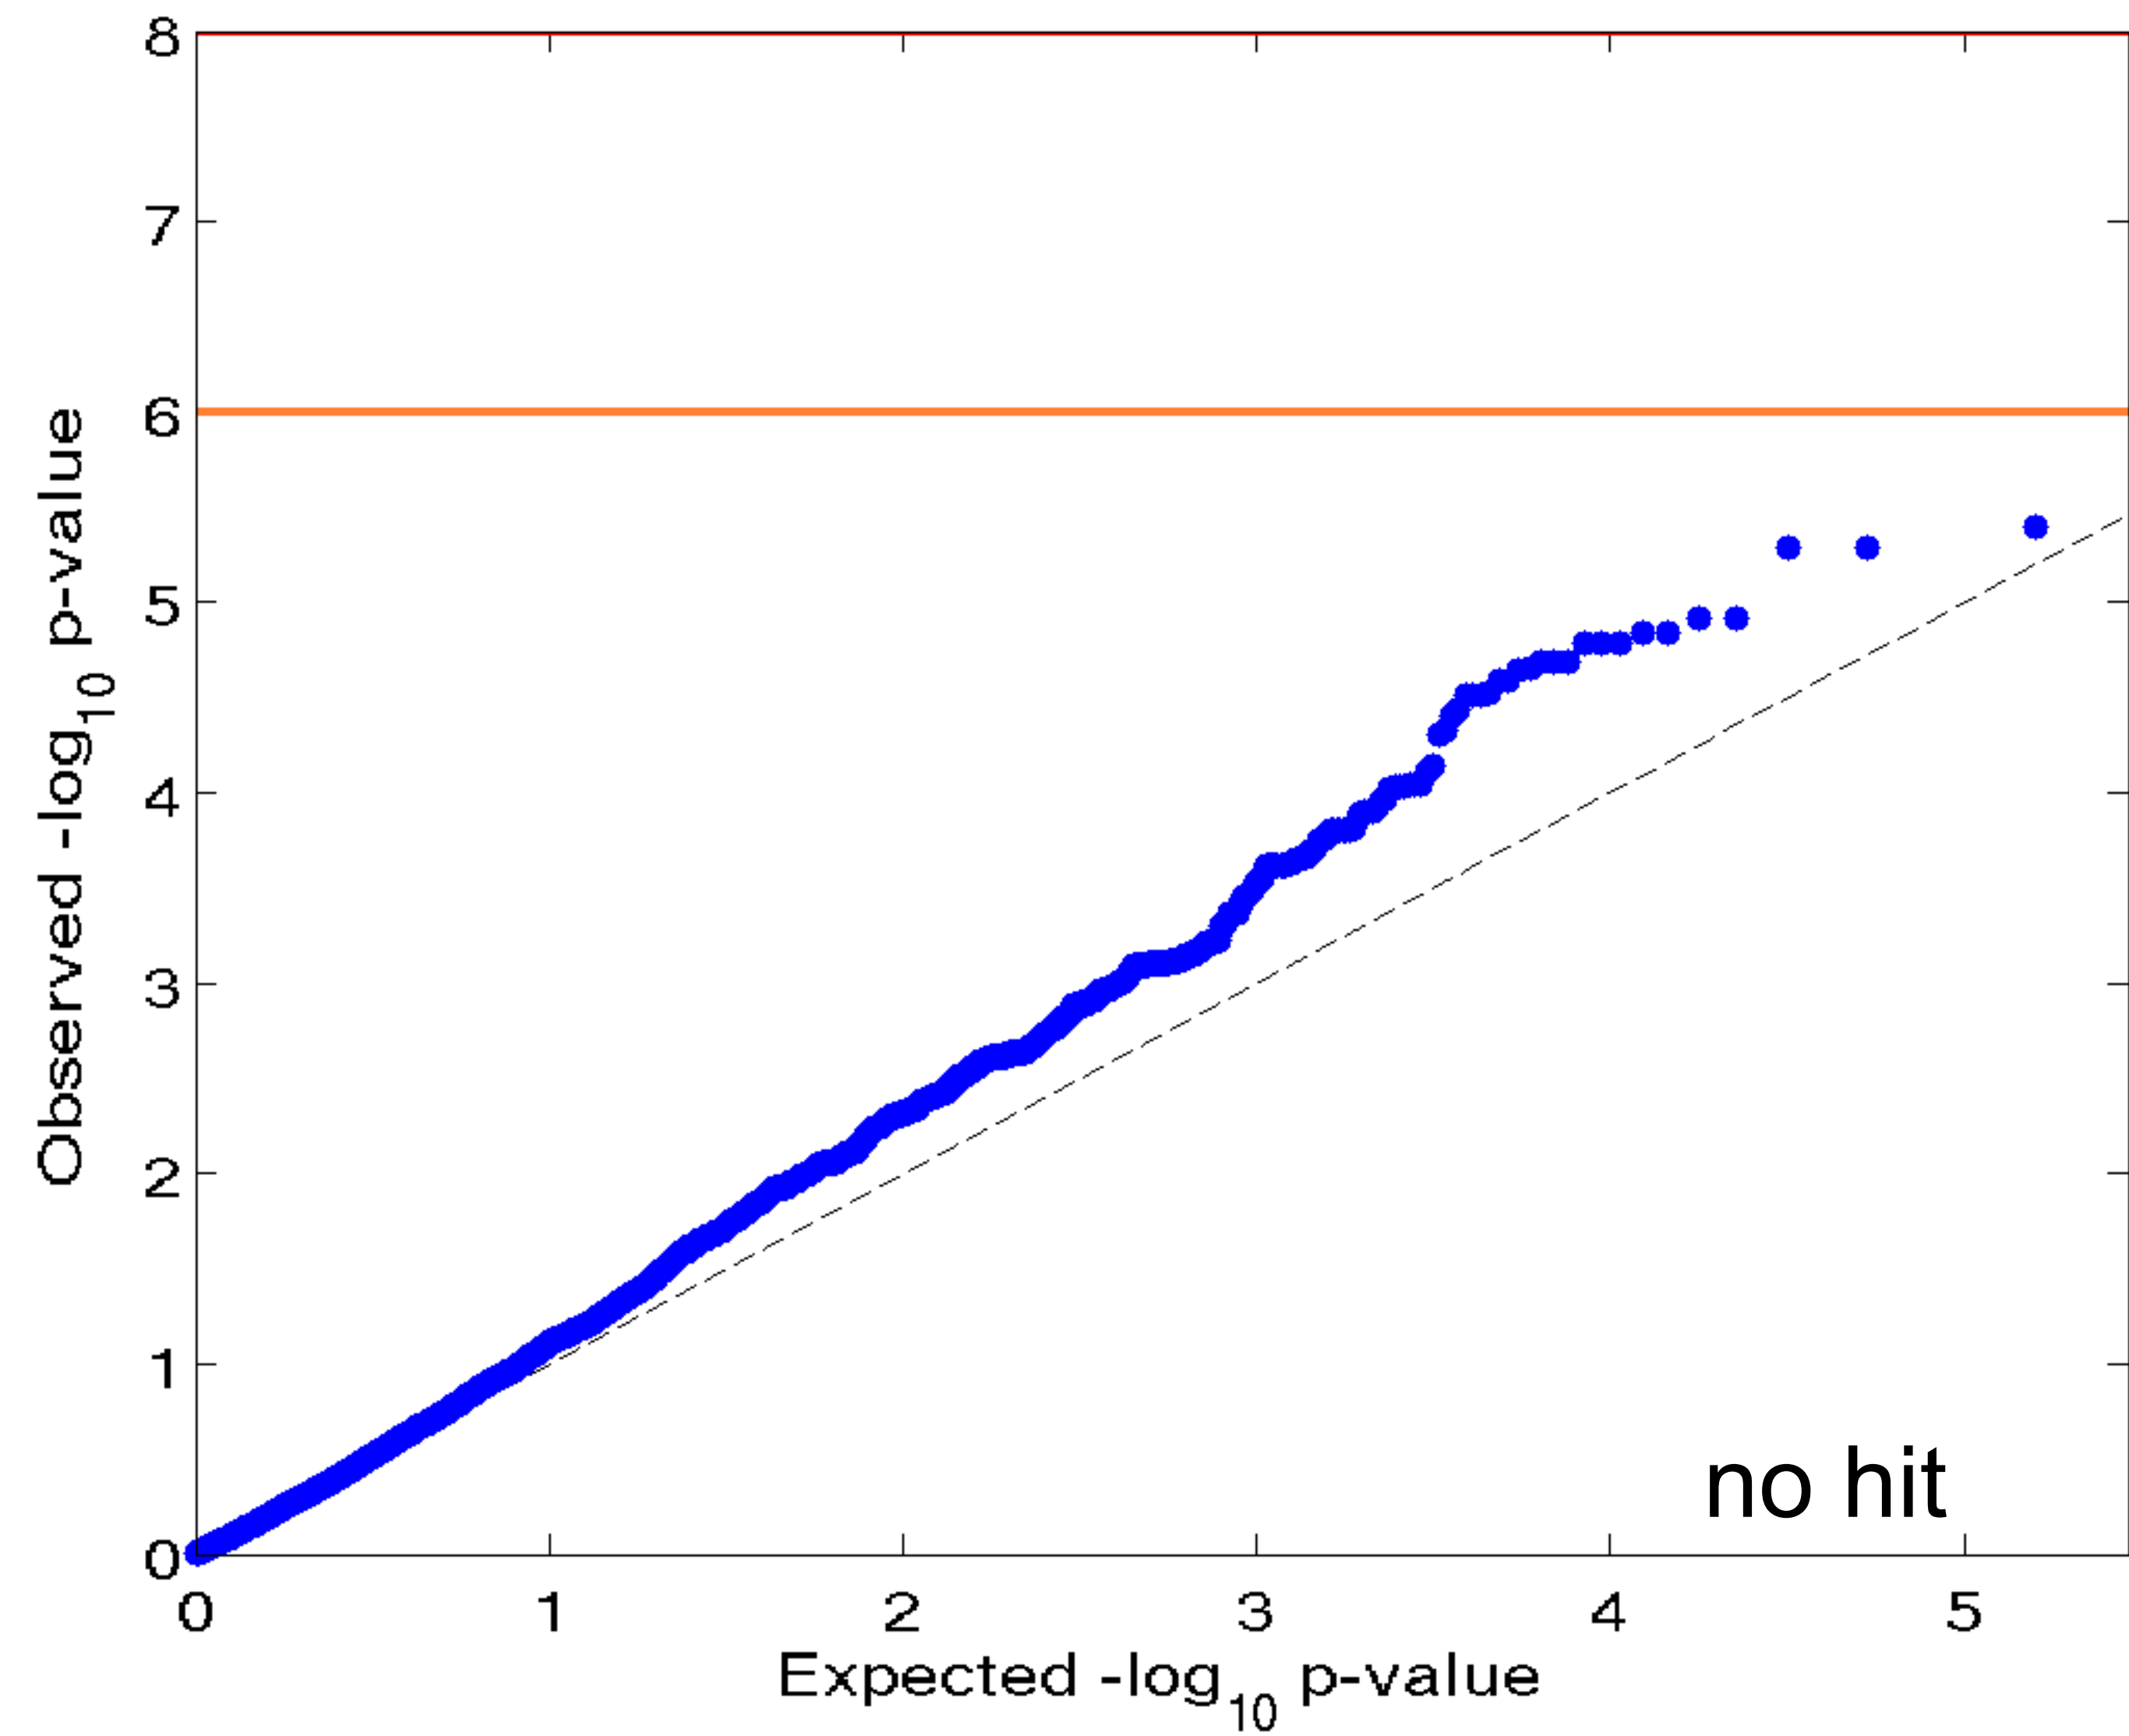



SBP - iso10

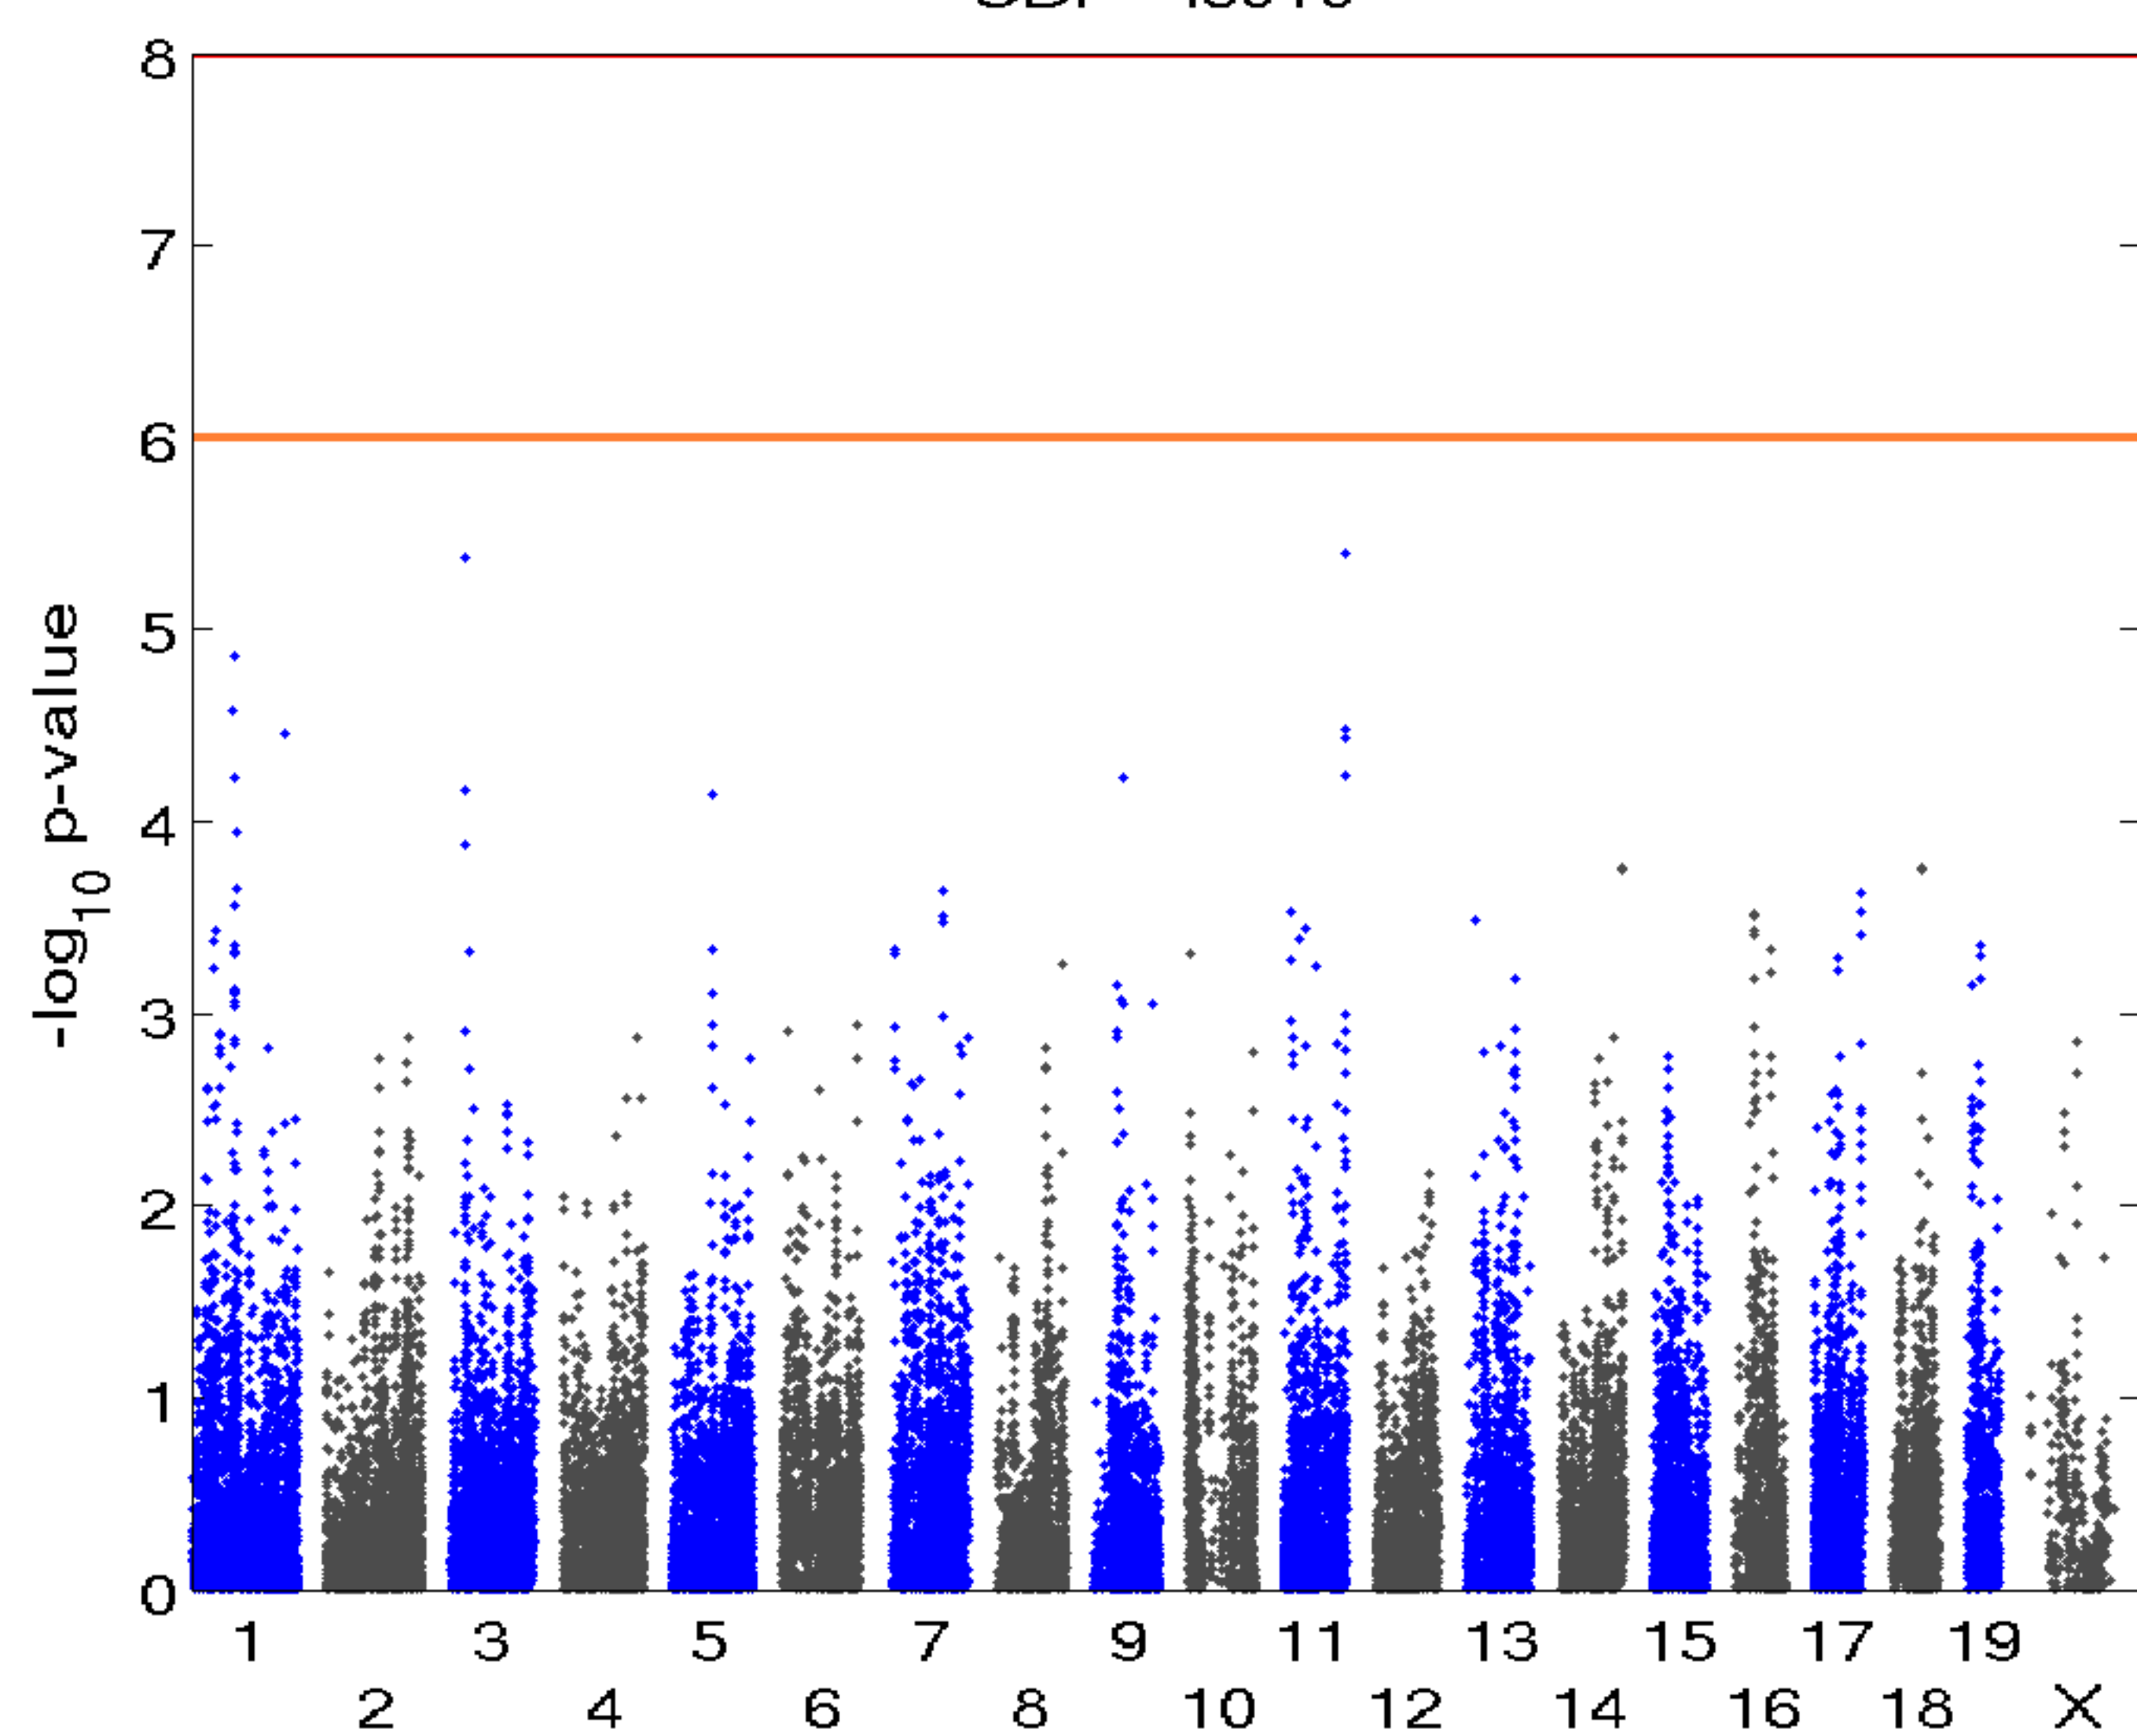

SBP - iso10

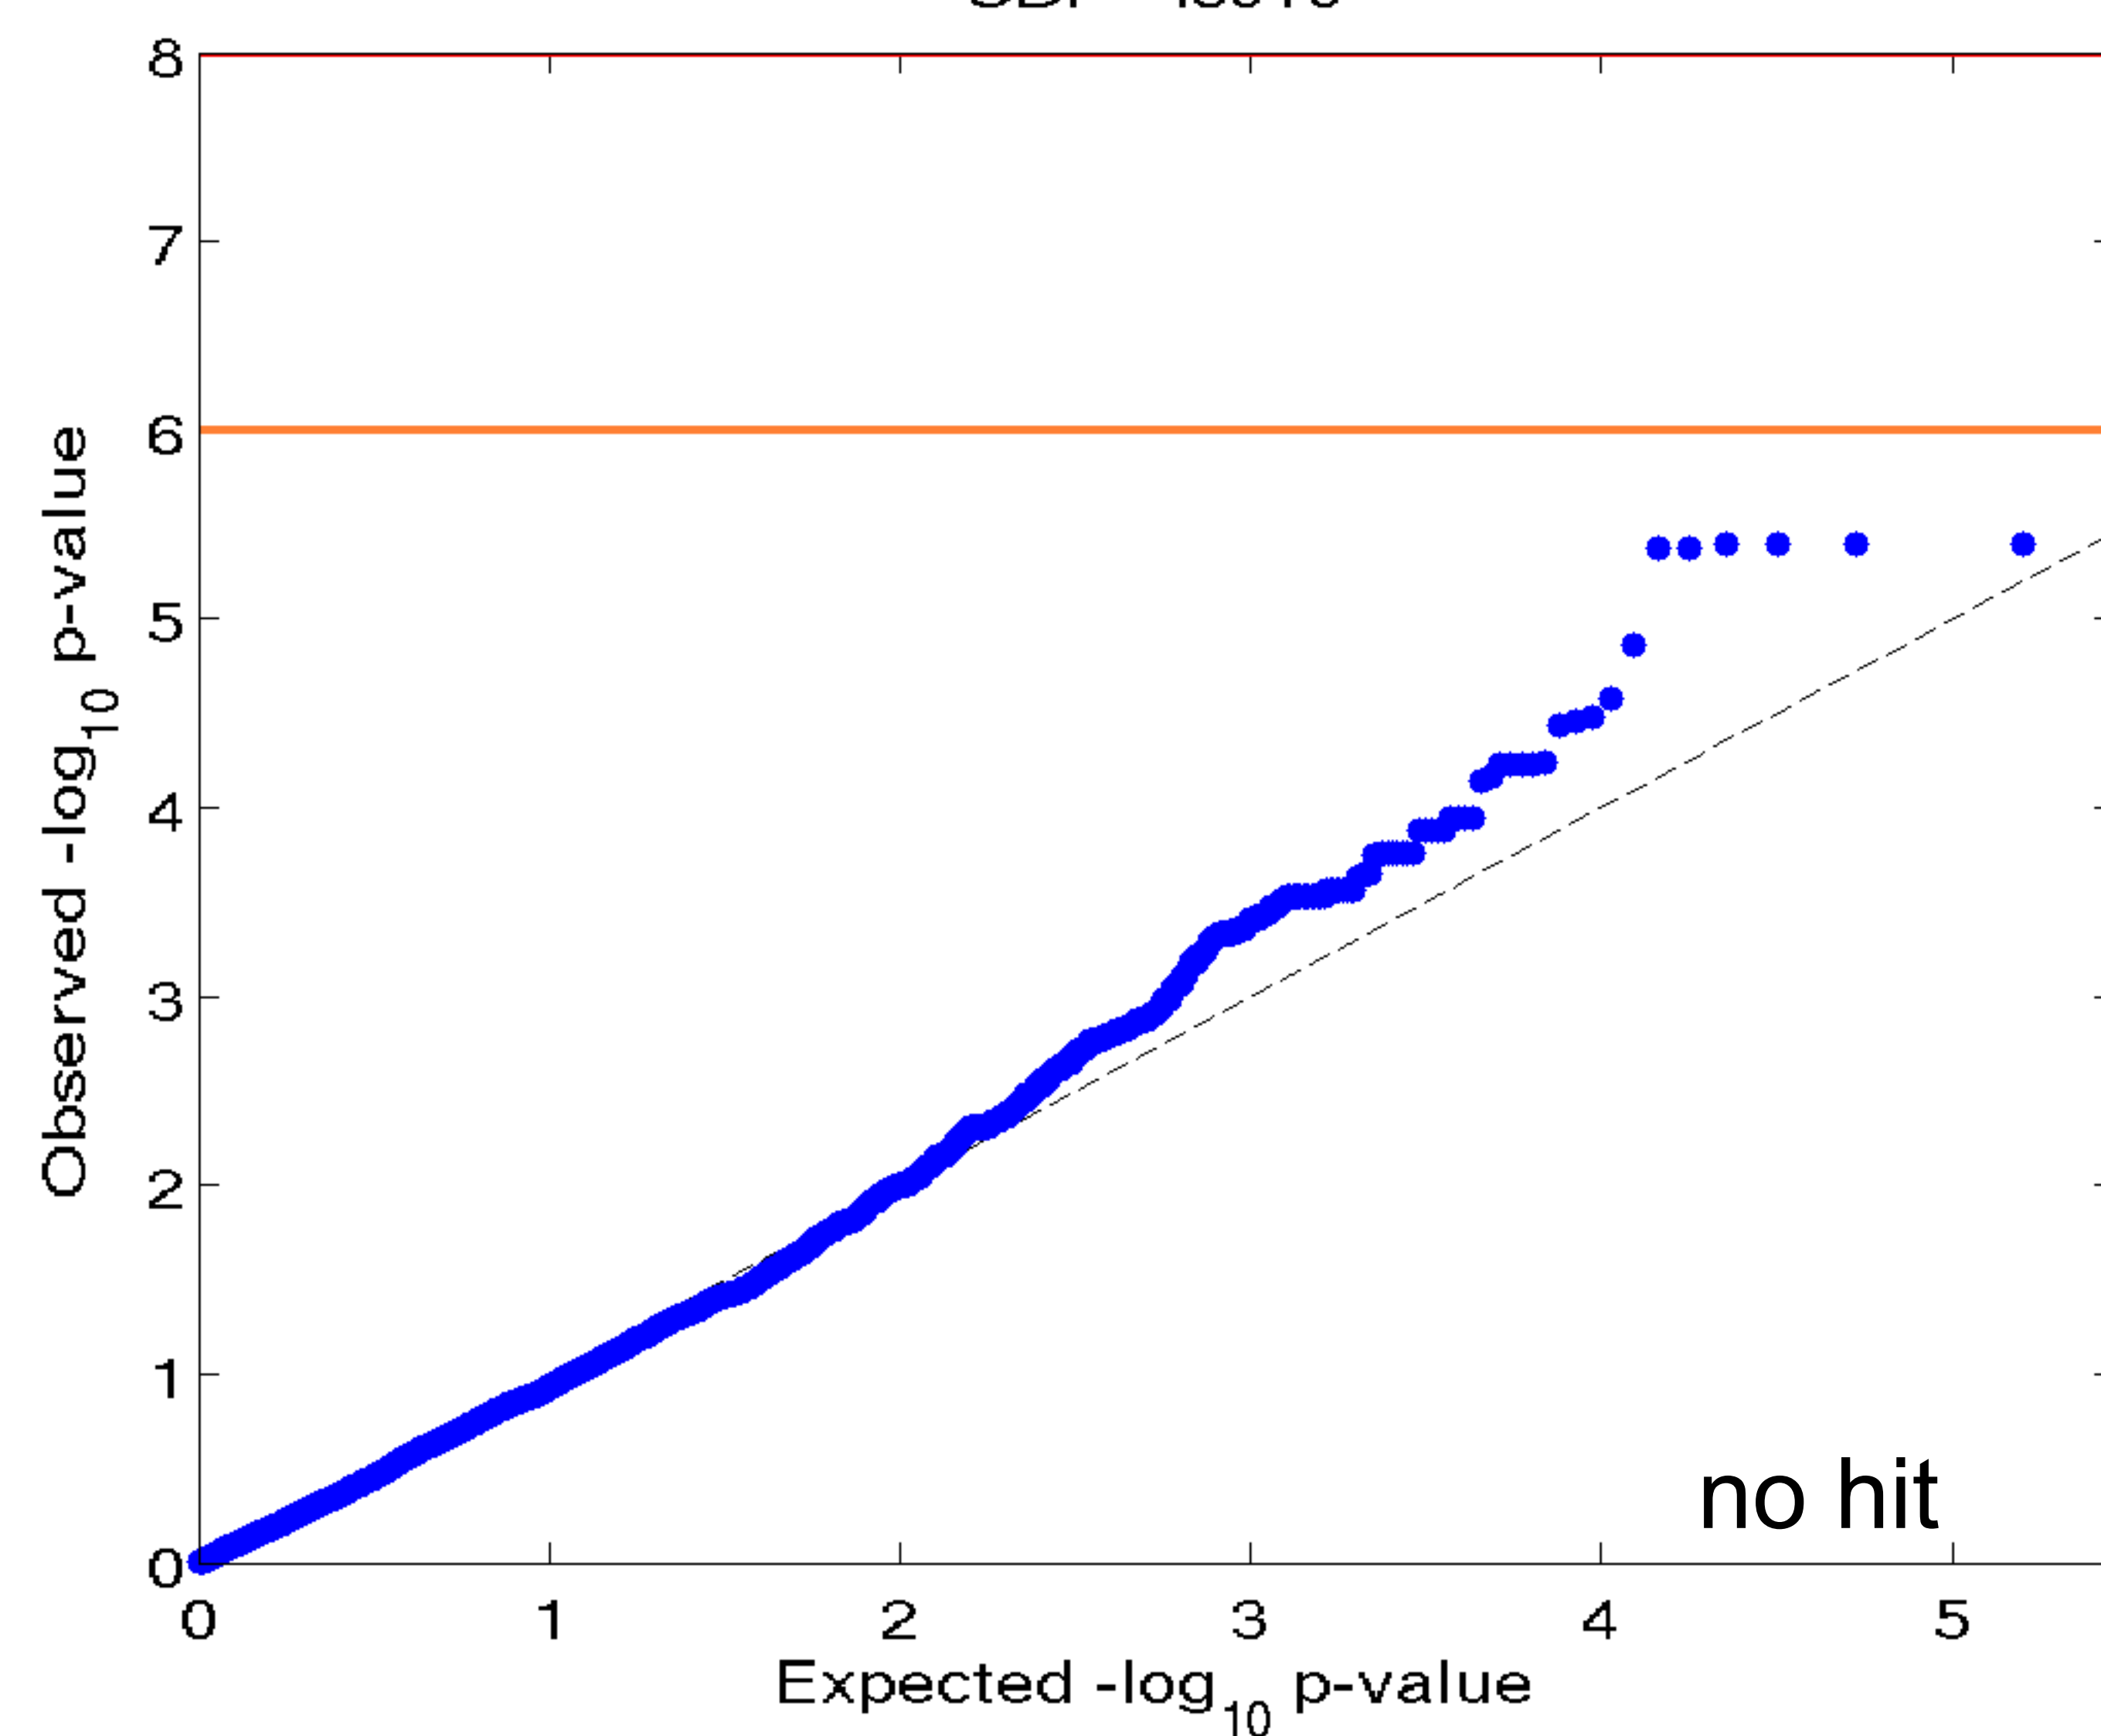

ST - iso10

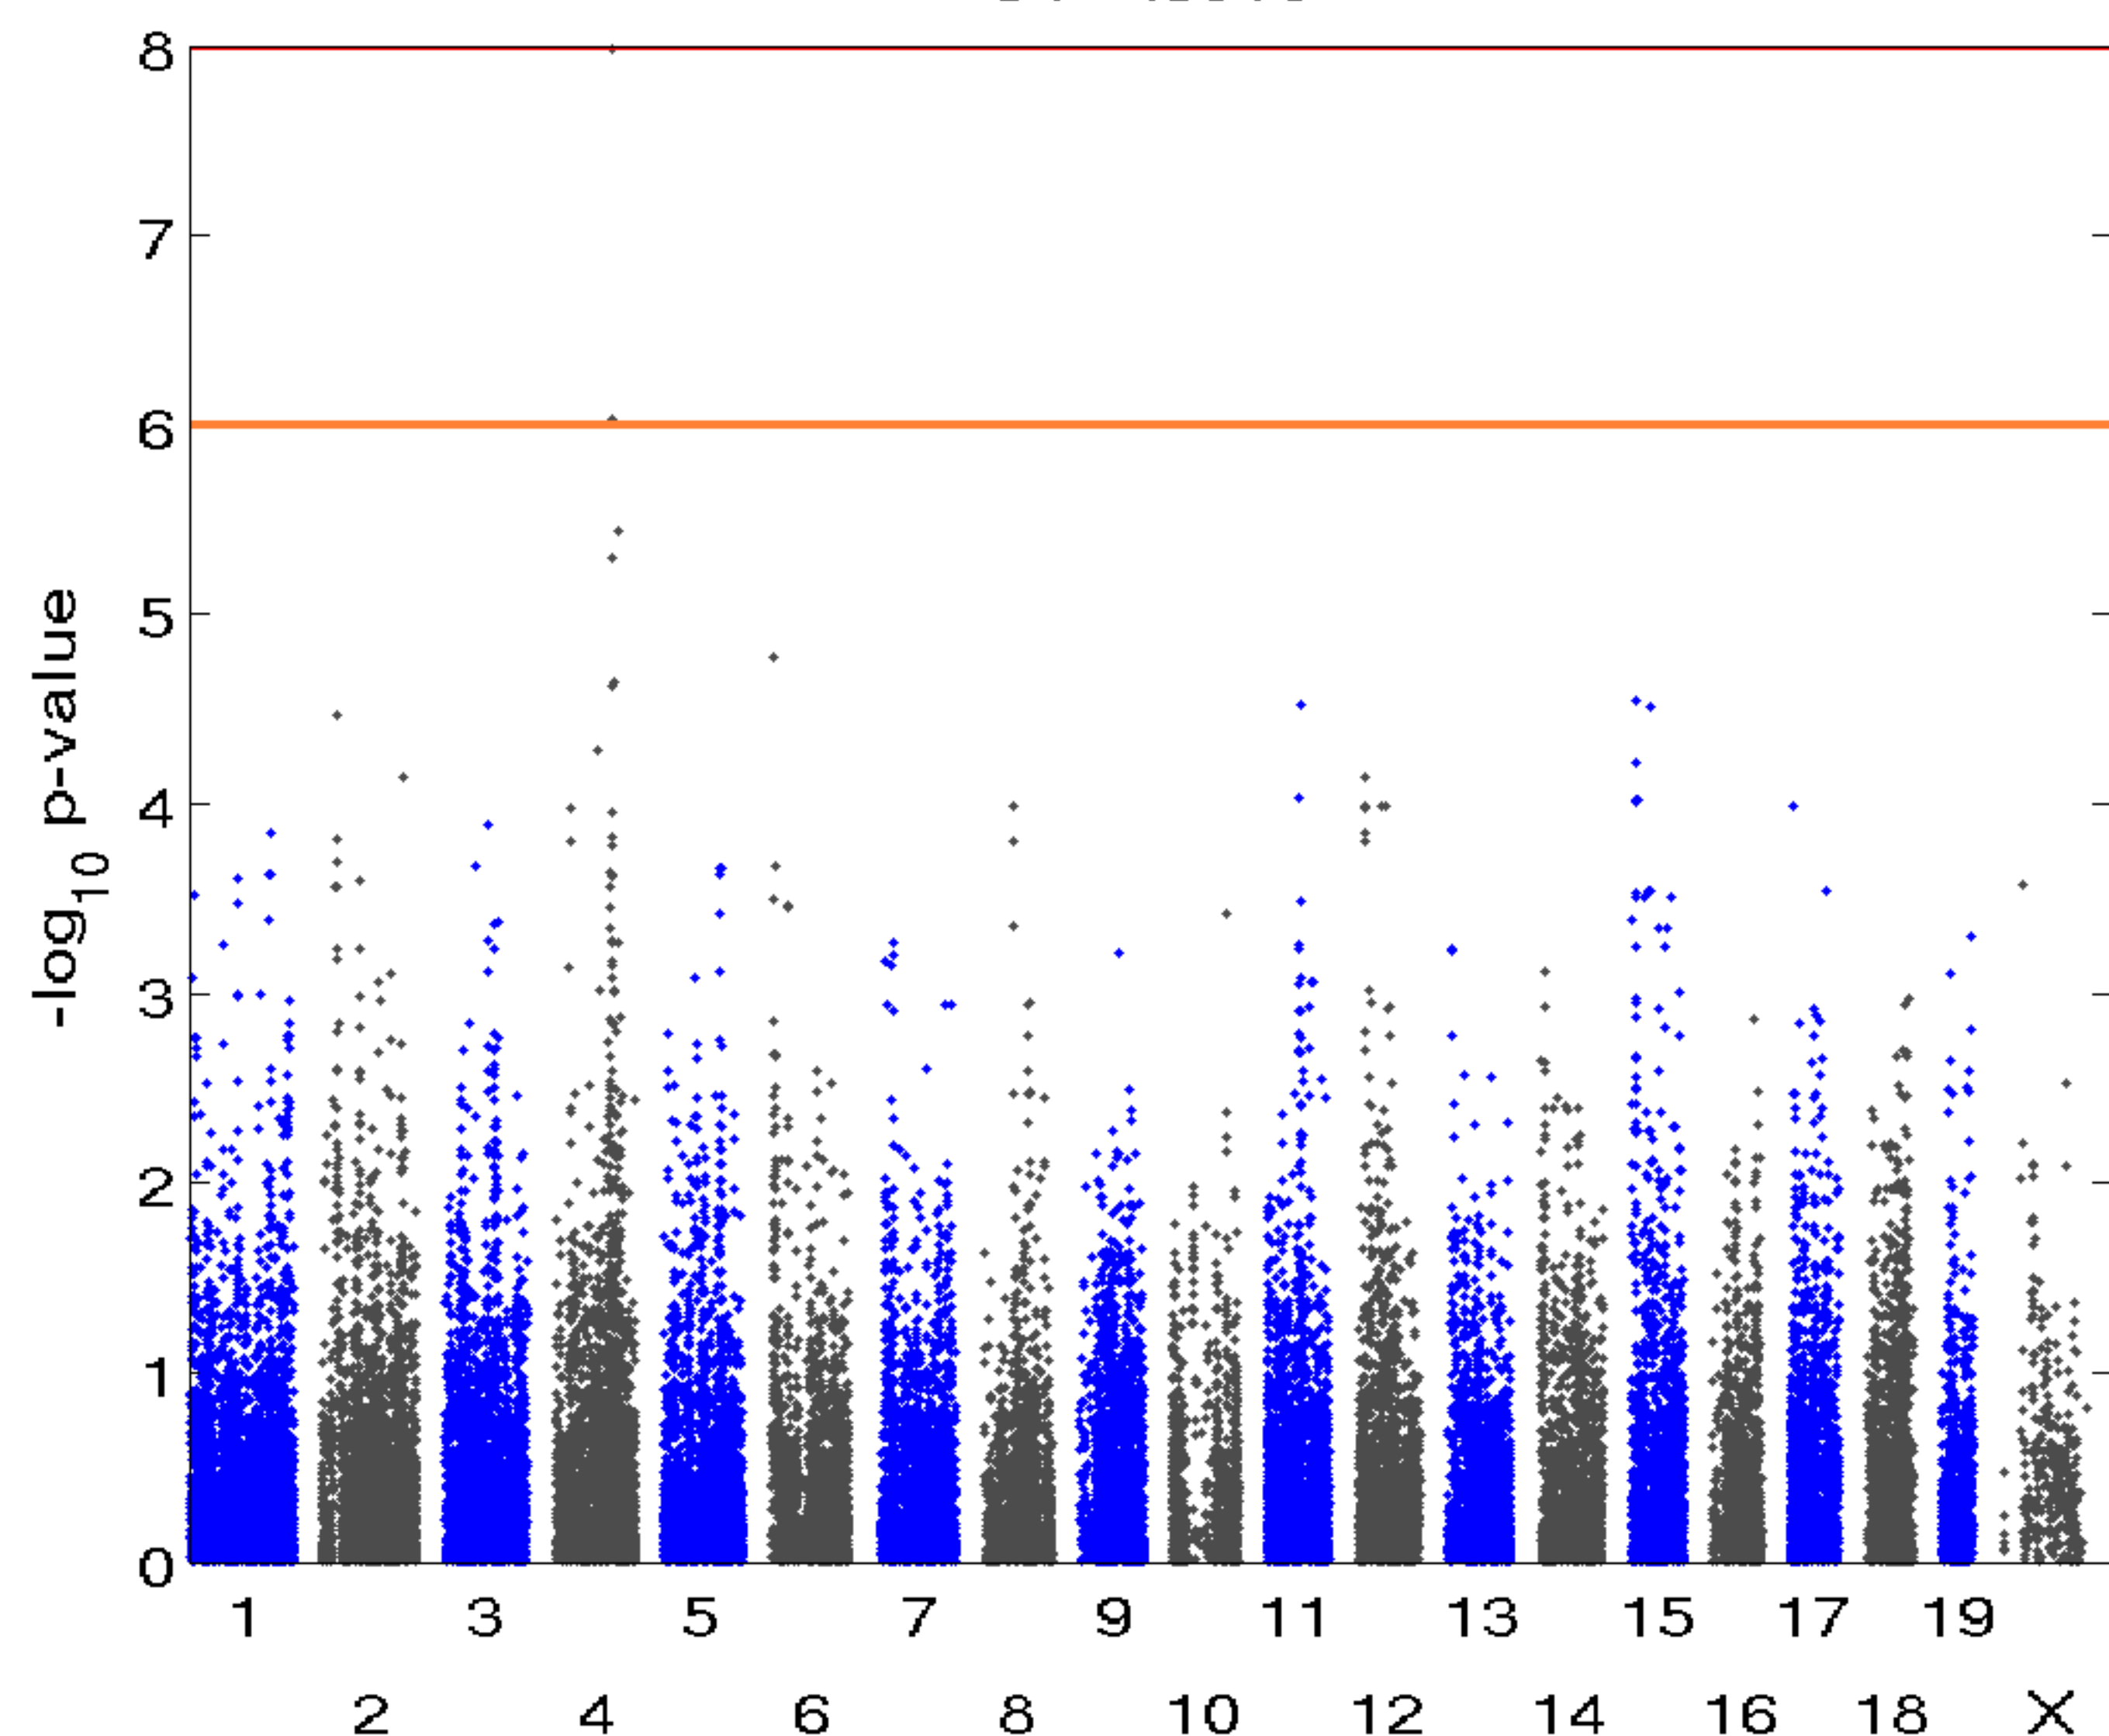

ST - iso10

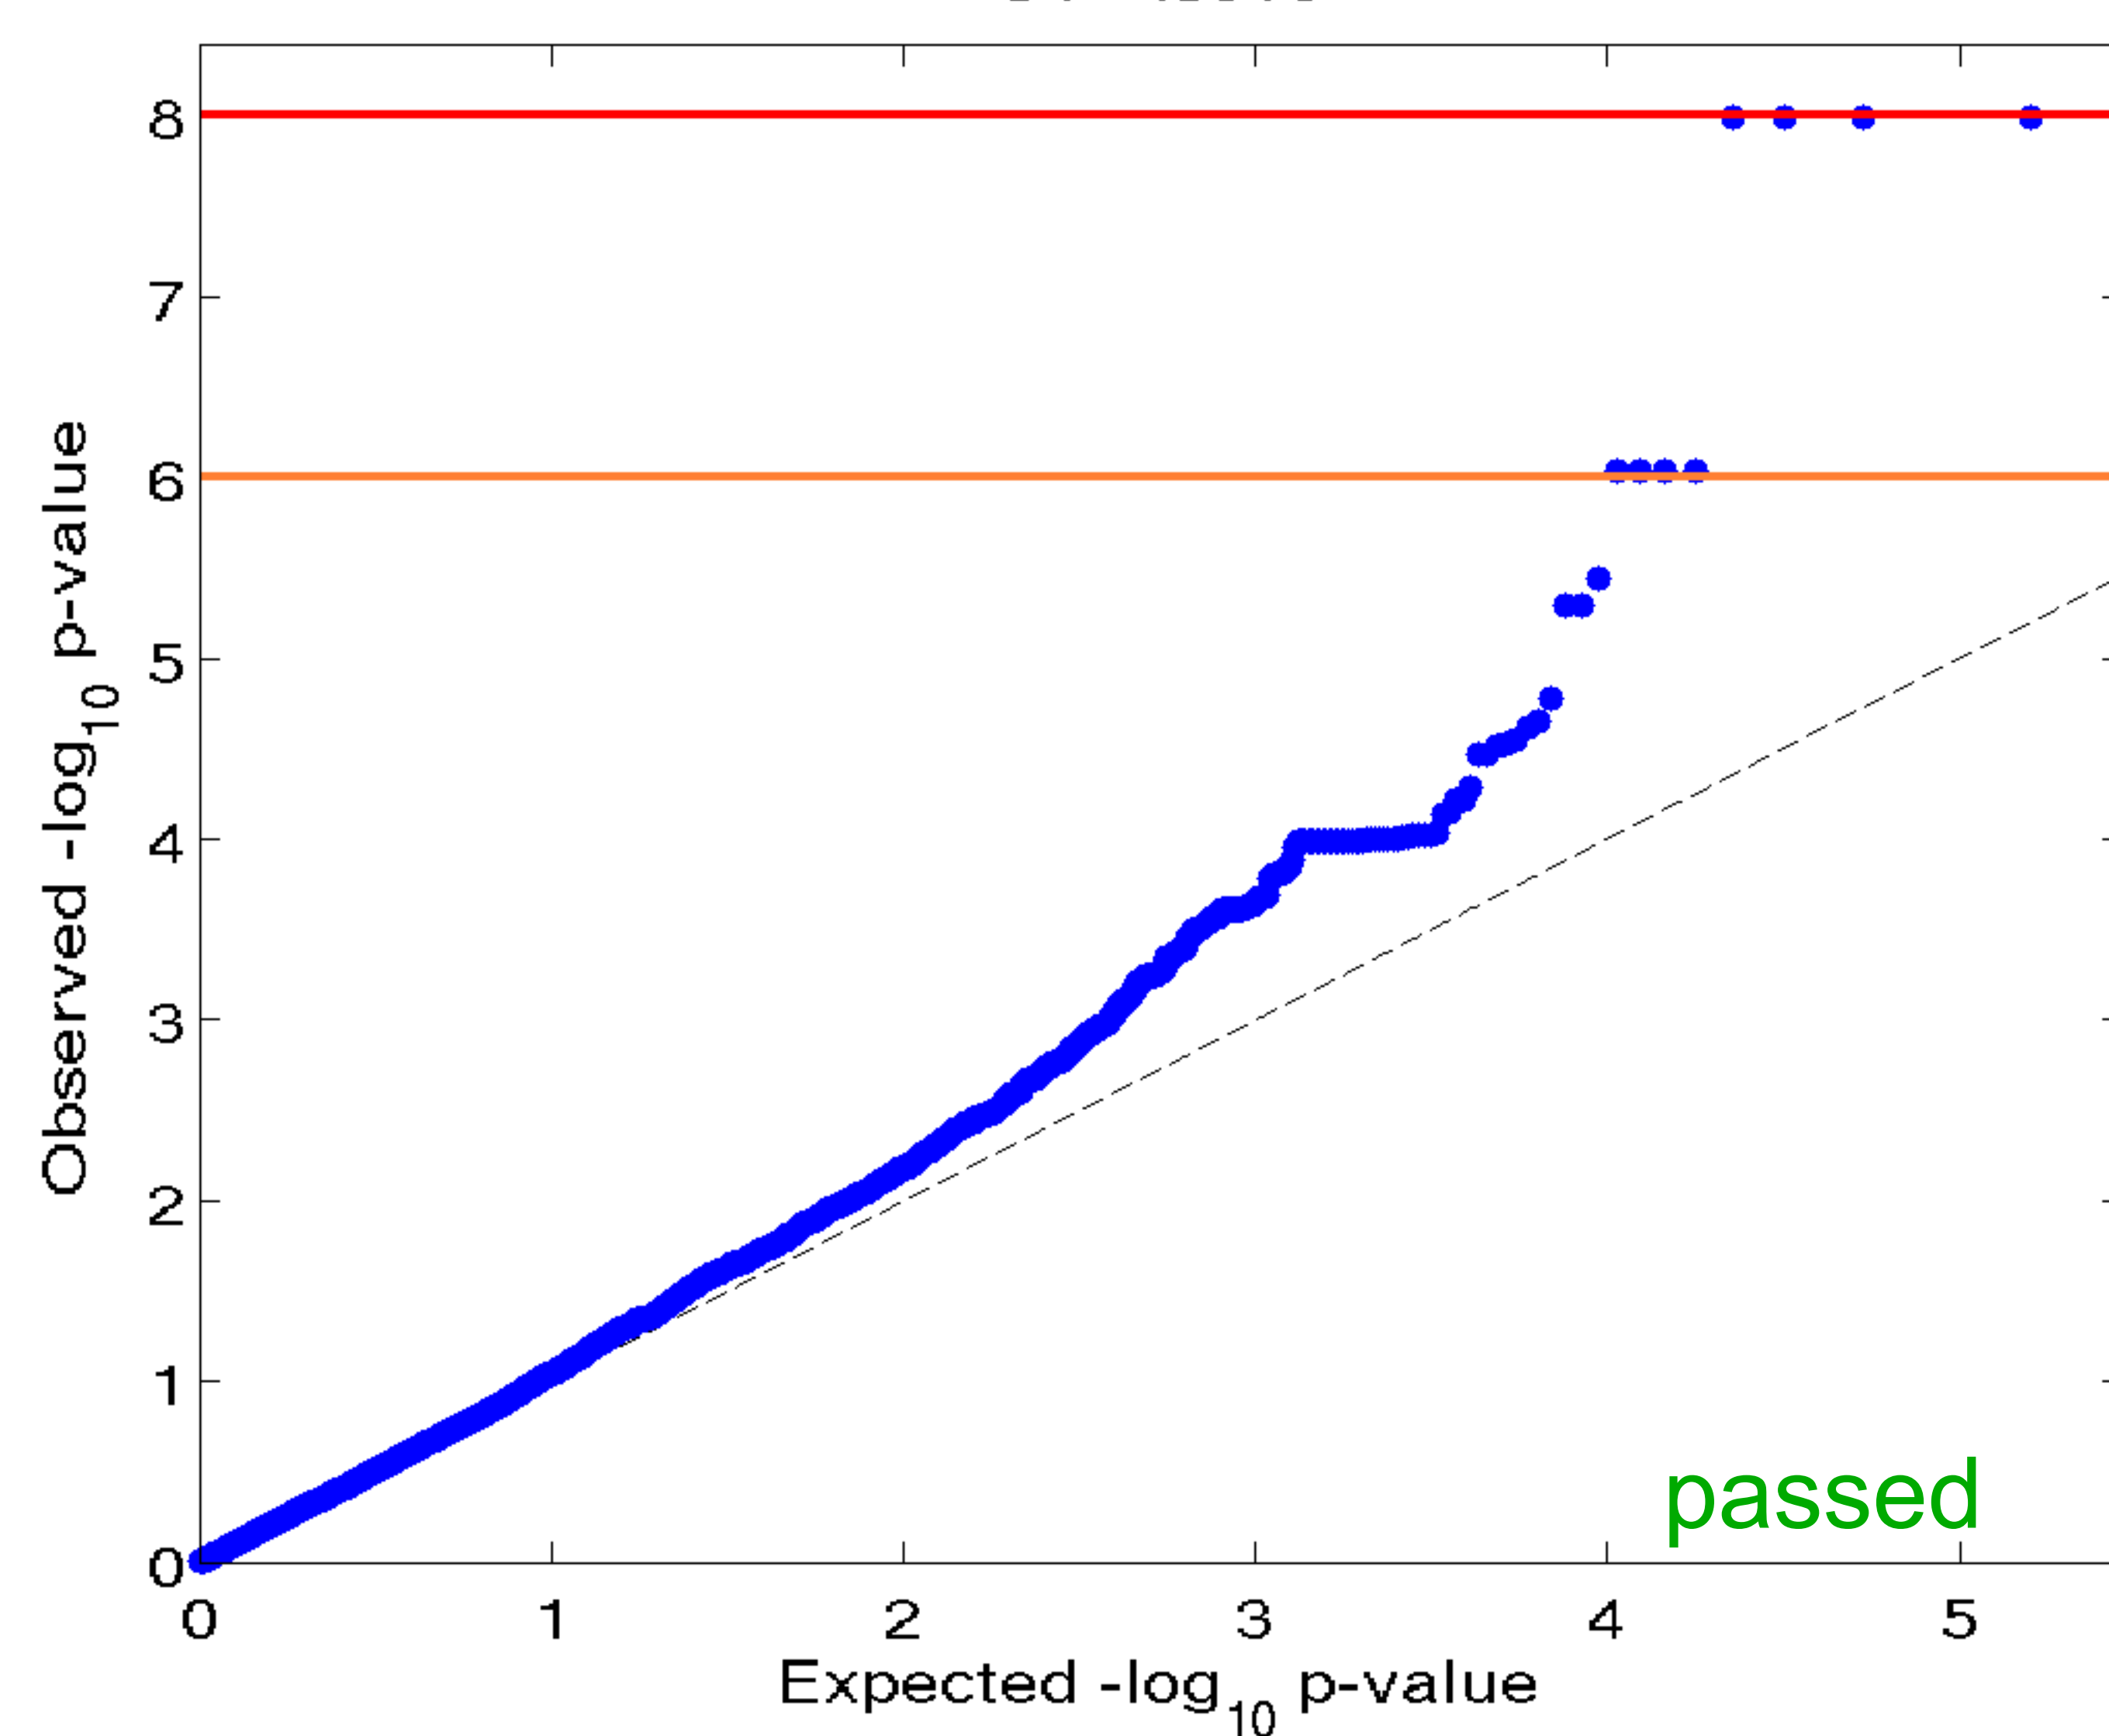

VW/AW - iso10

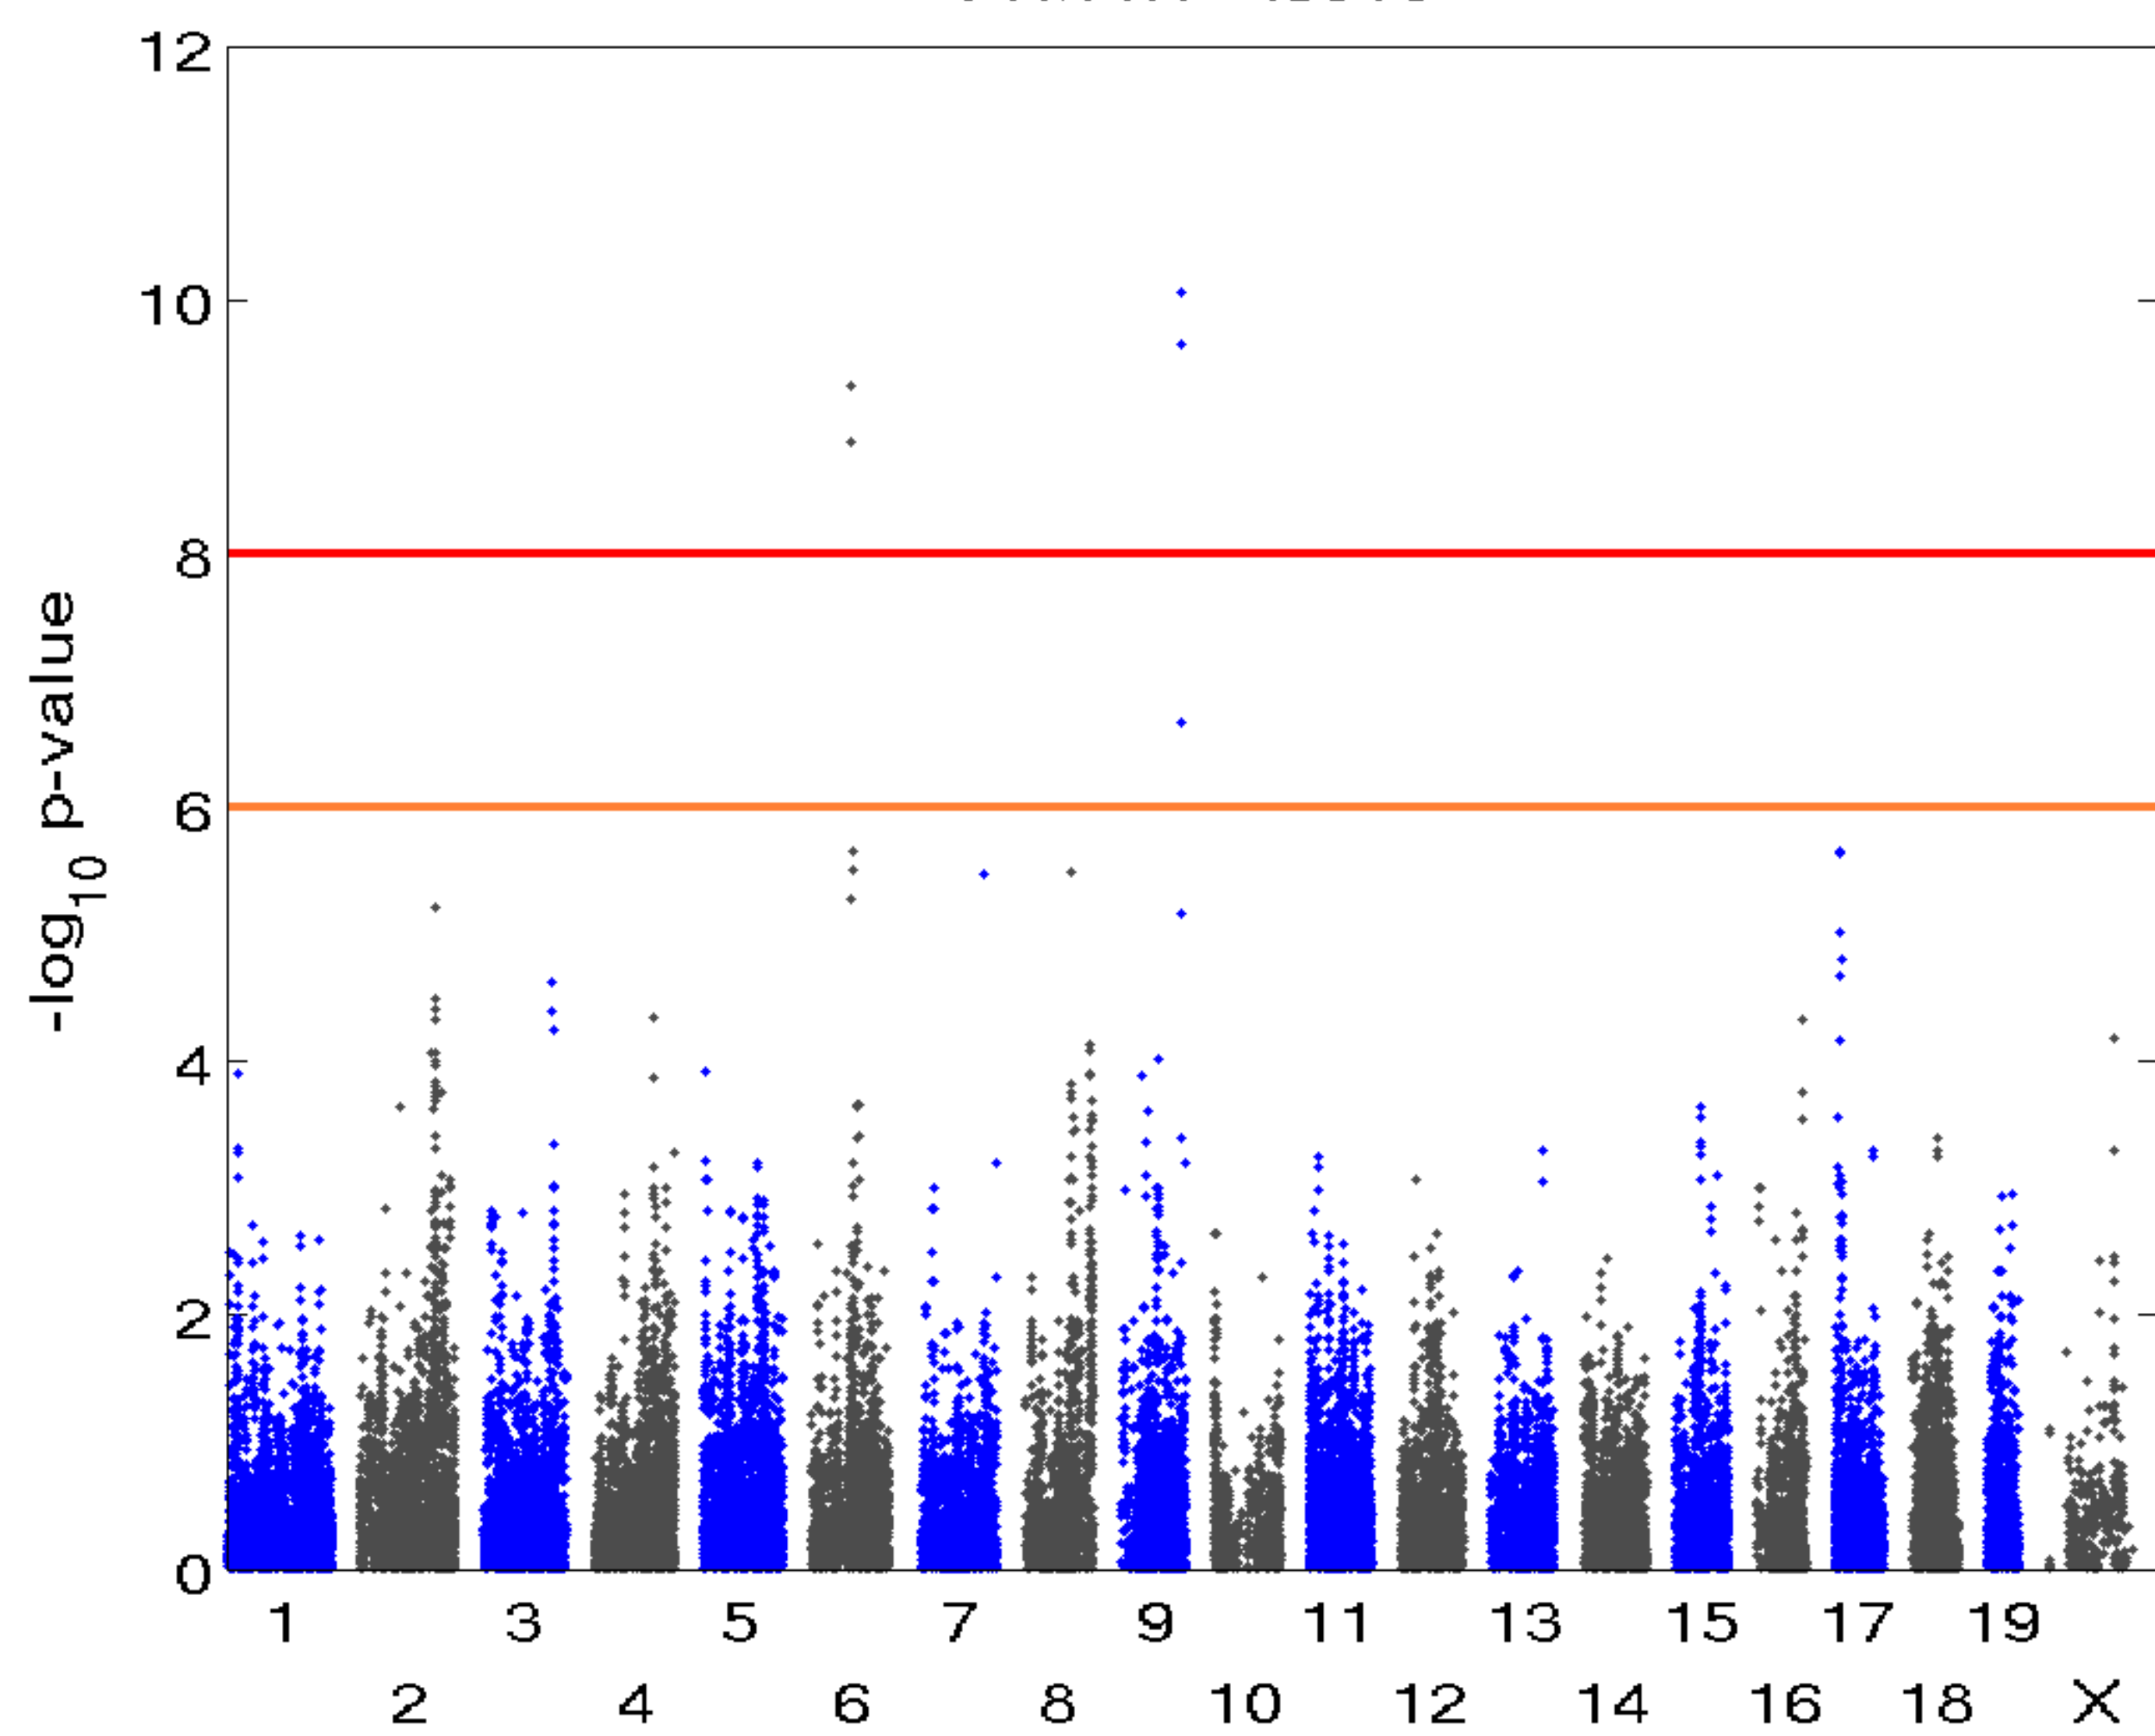

VW/AW - iso10

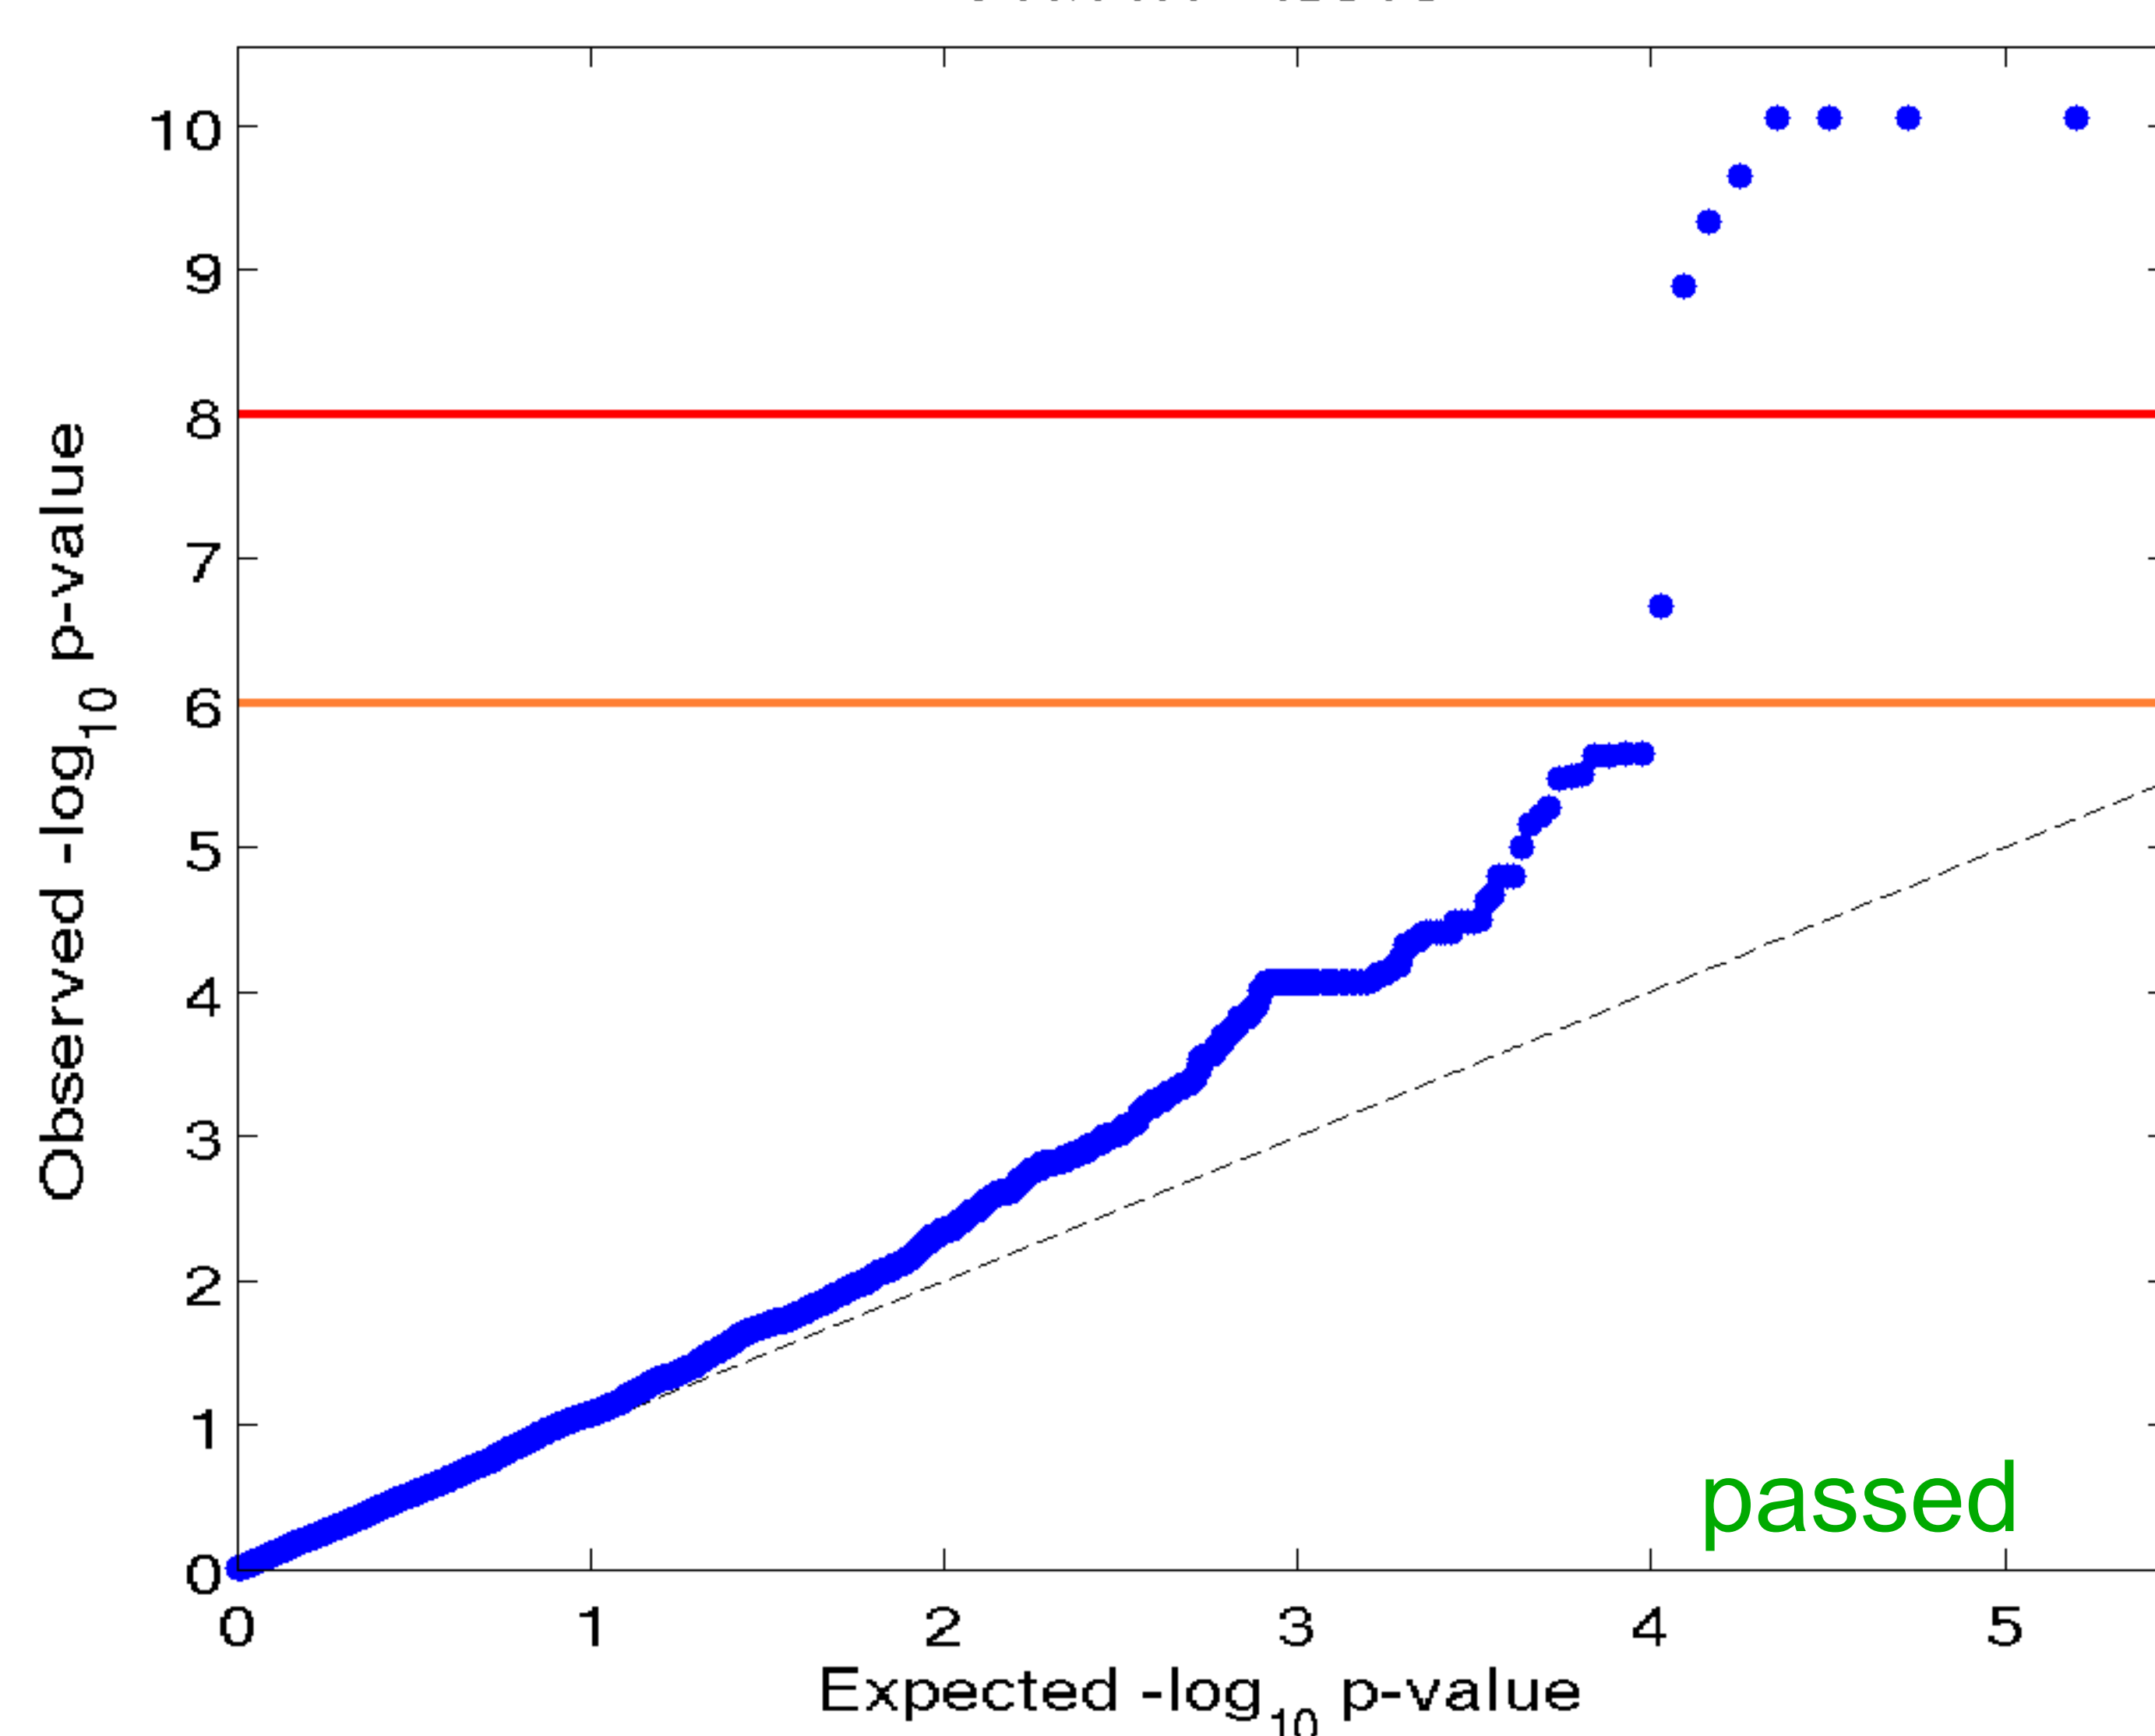

VW/BWS - iso10

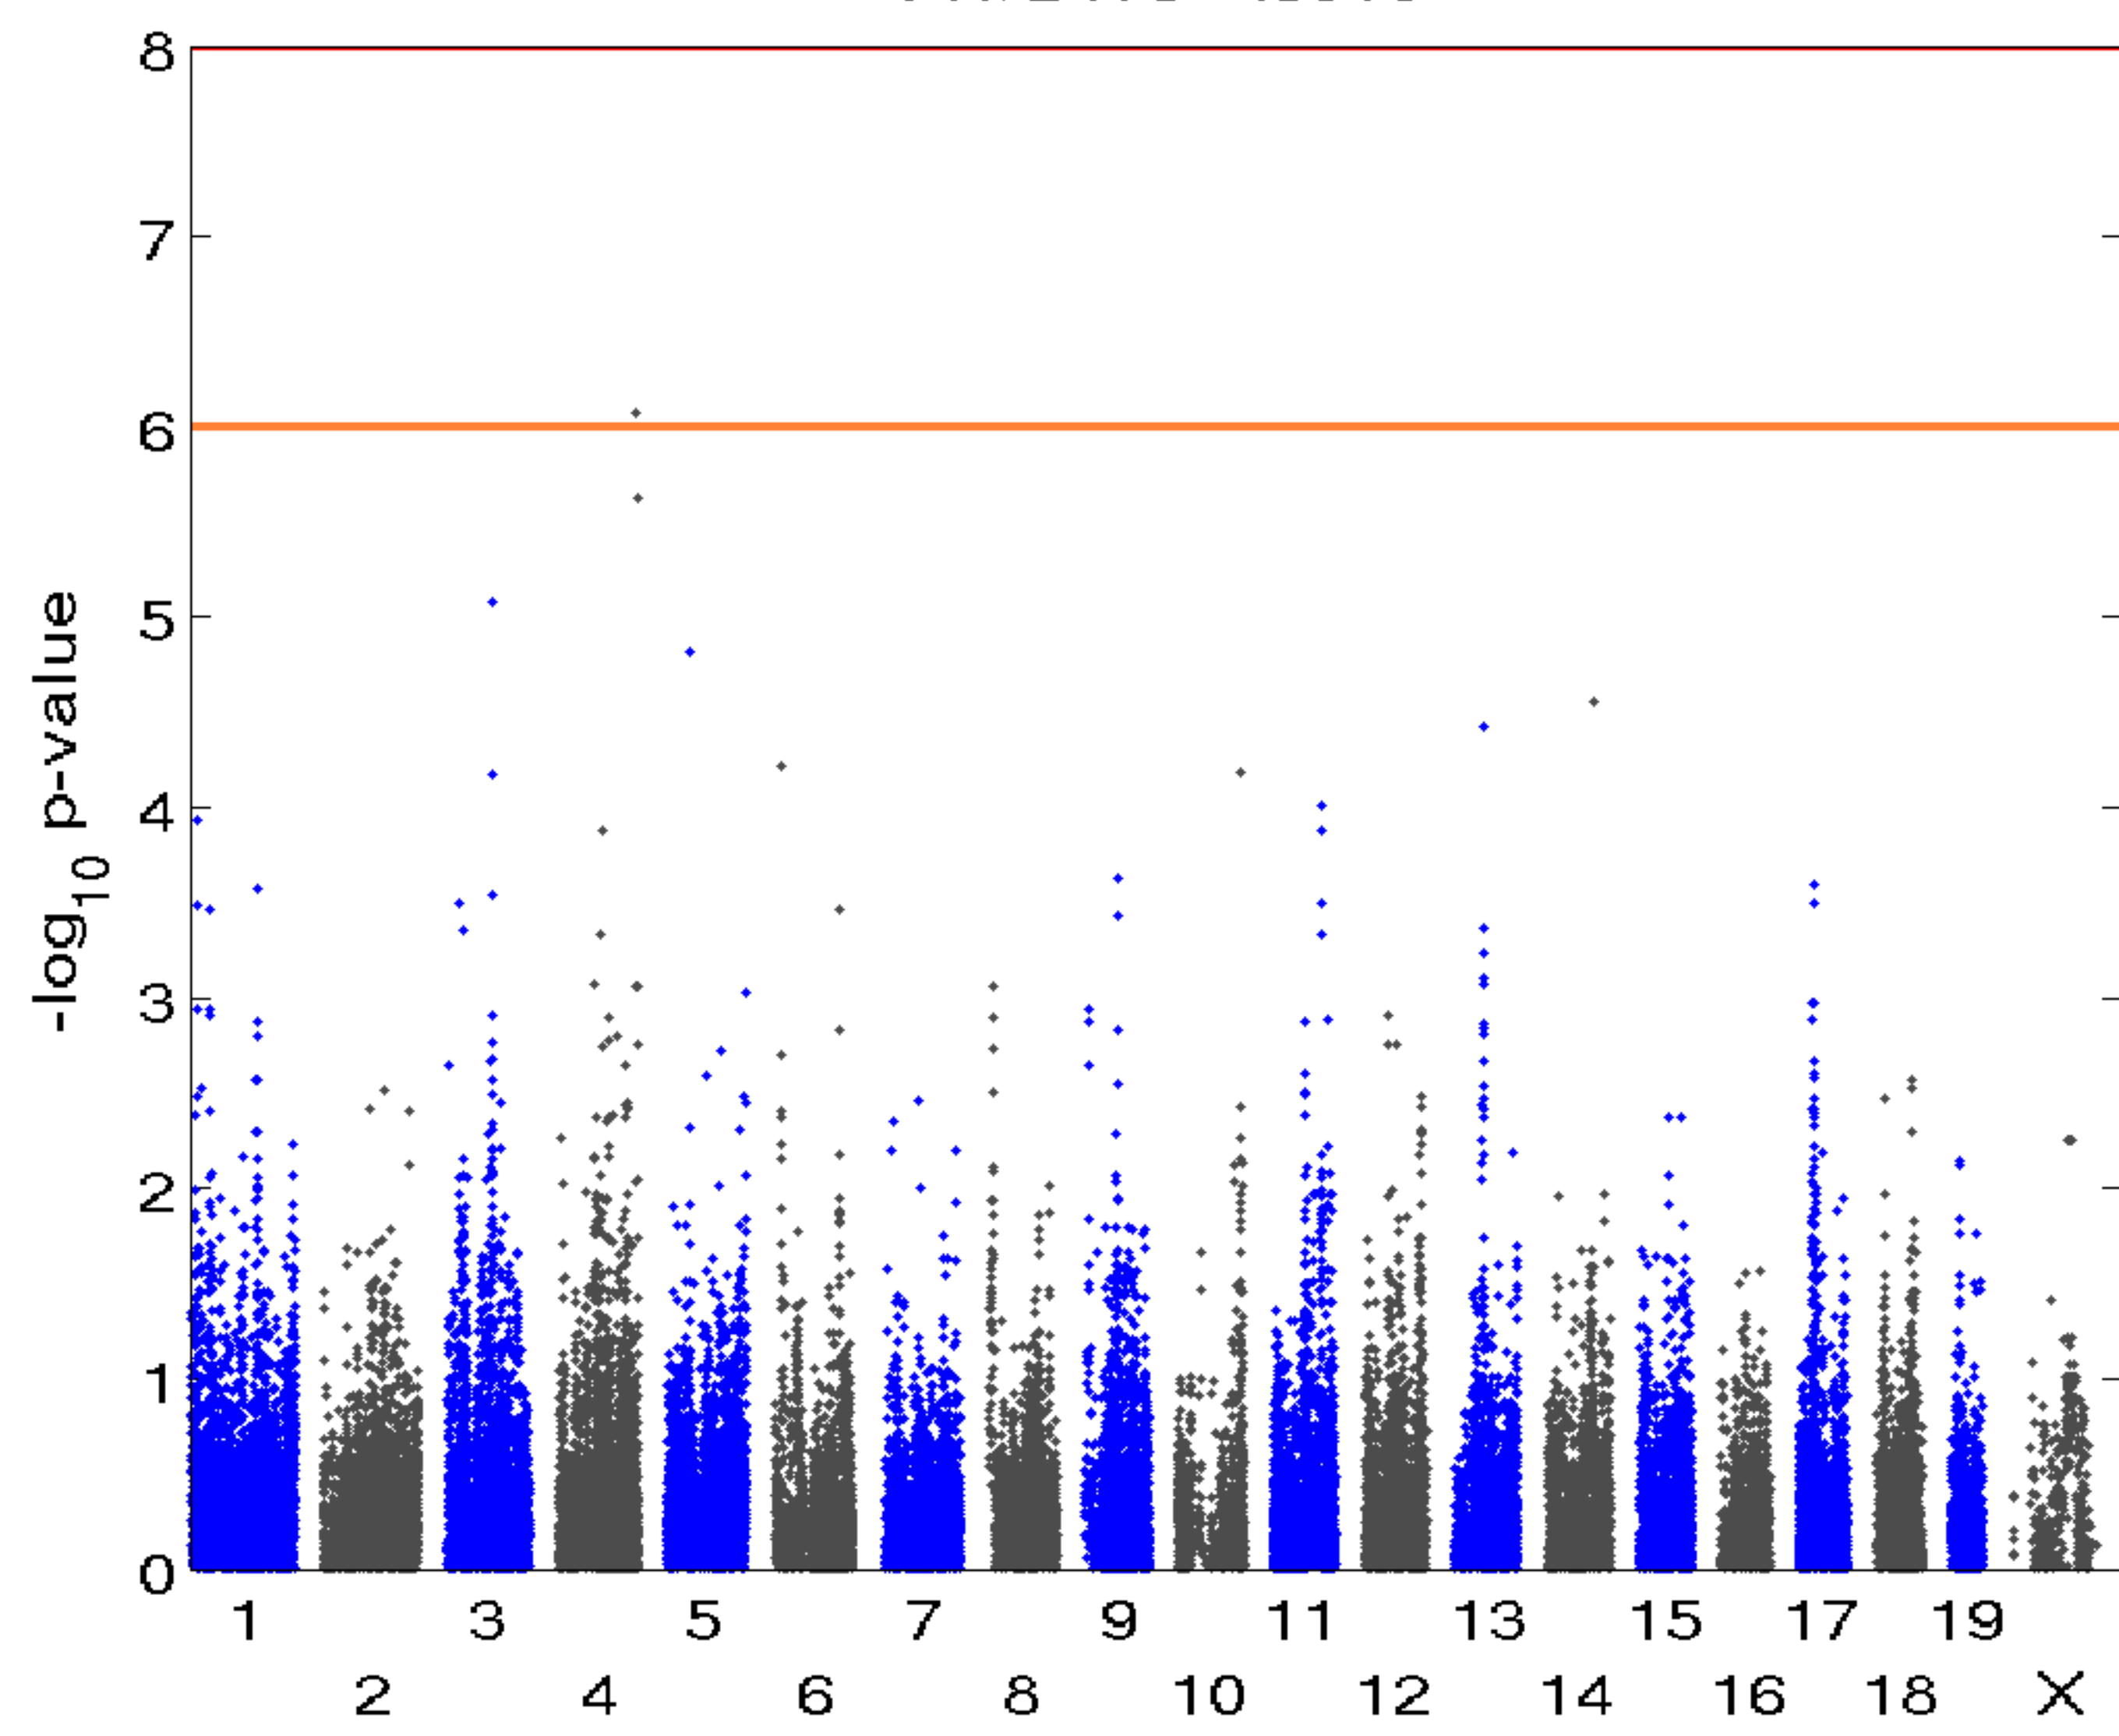

VW/BWS - iso10

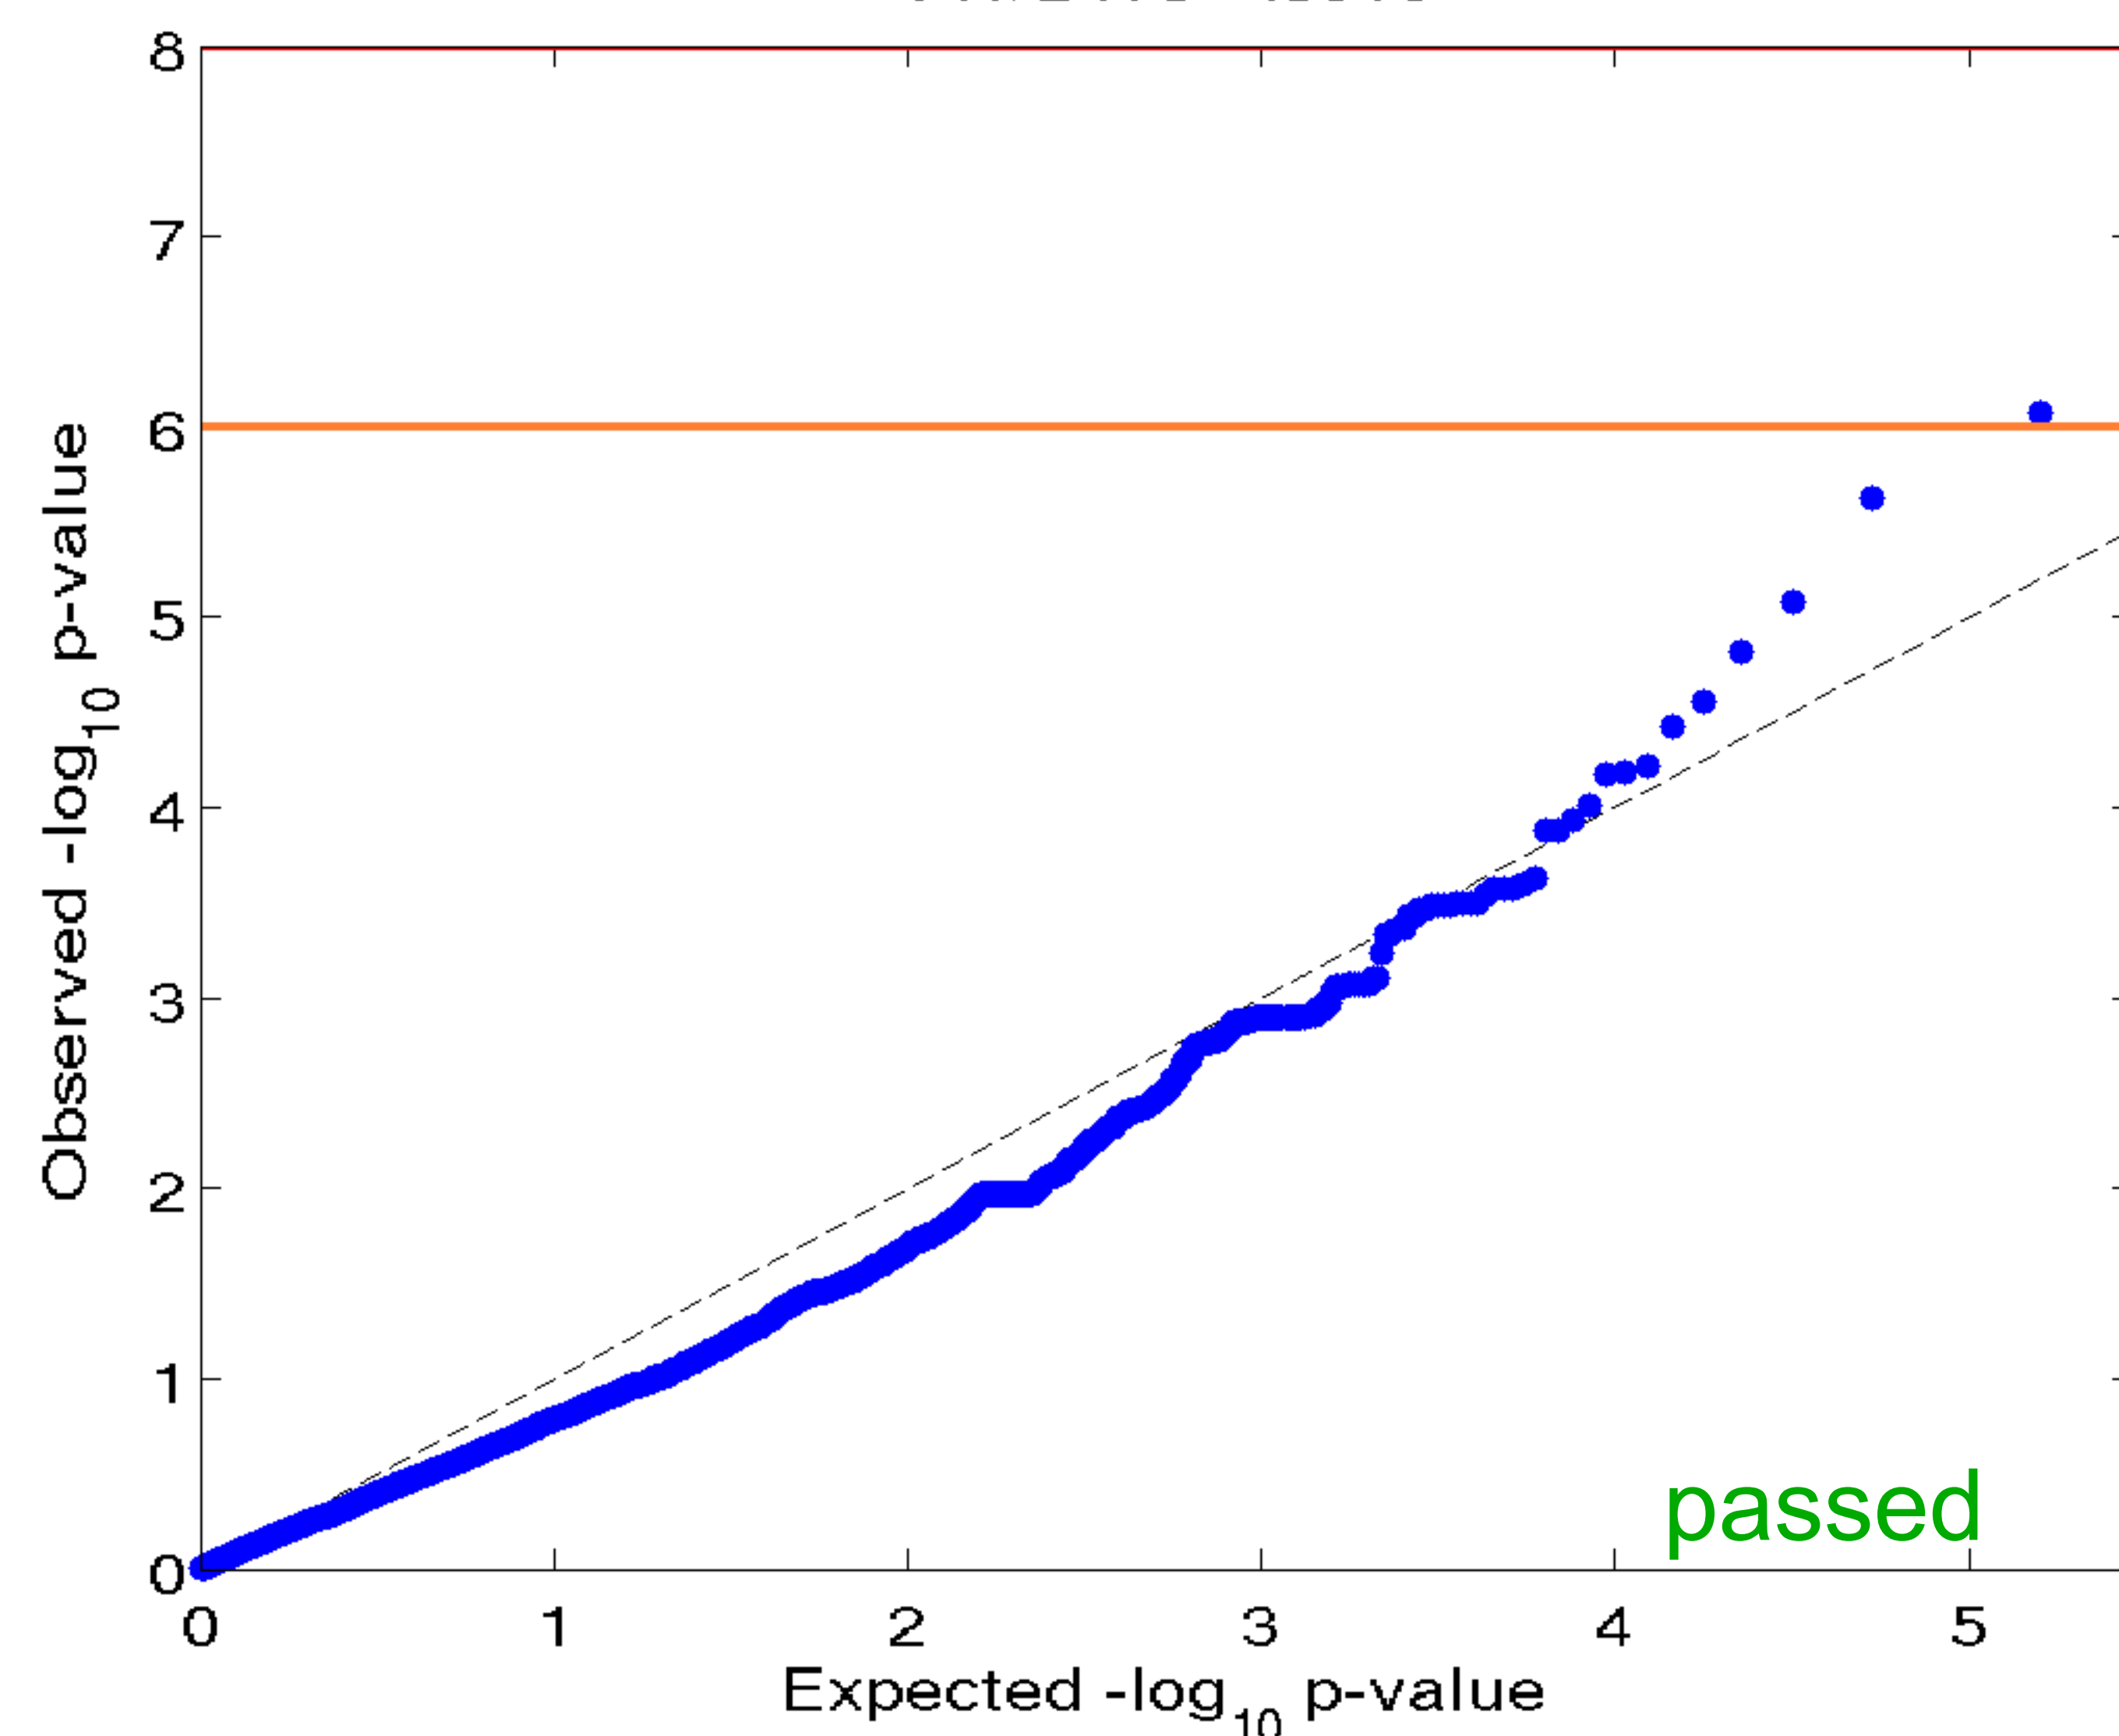

VWI - iso10

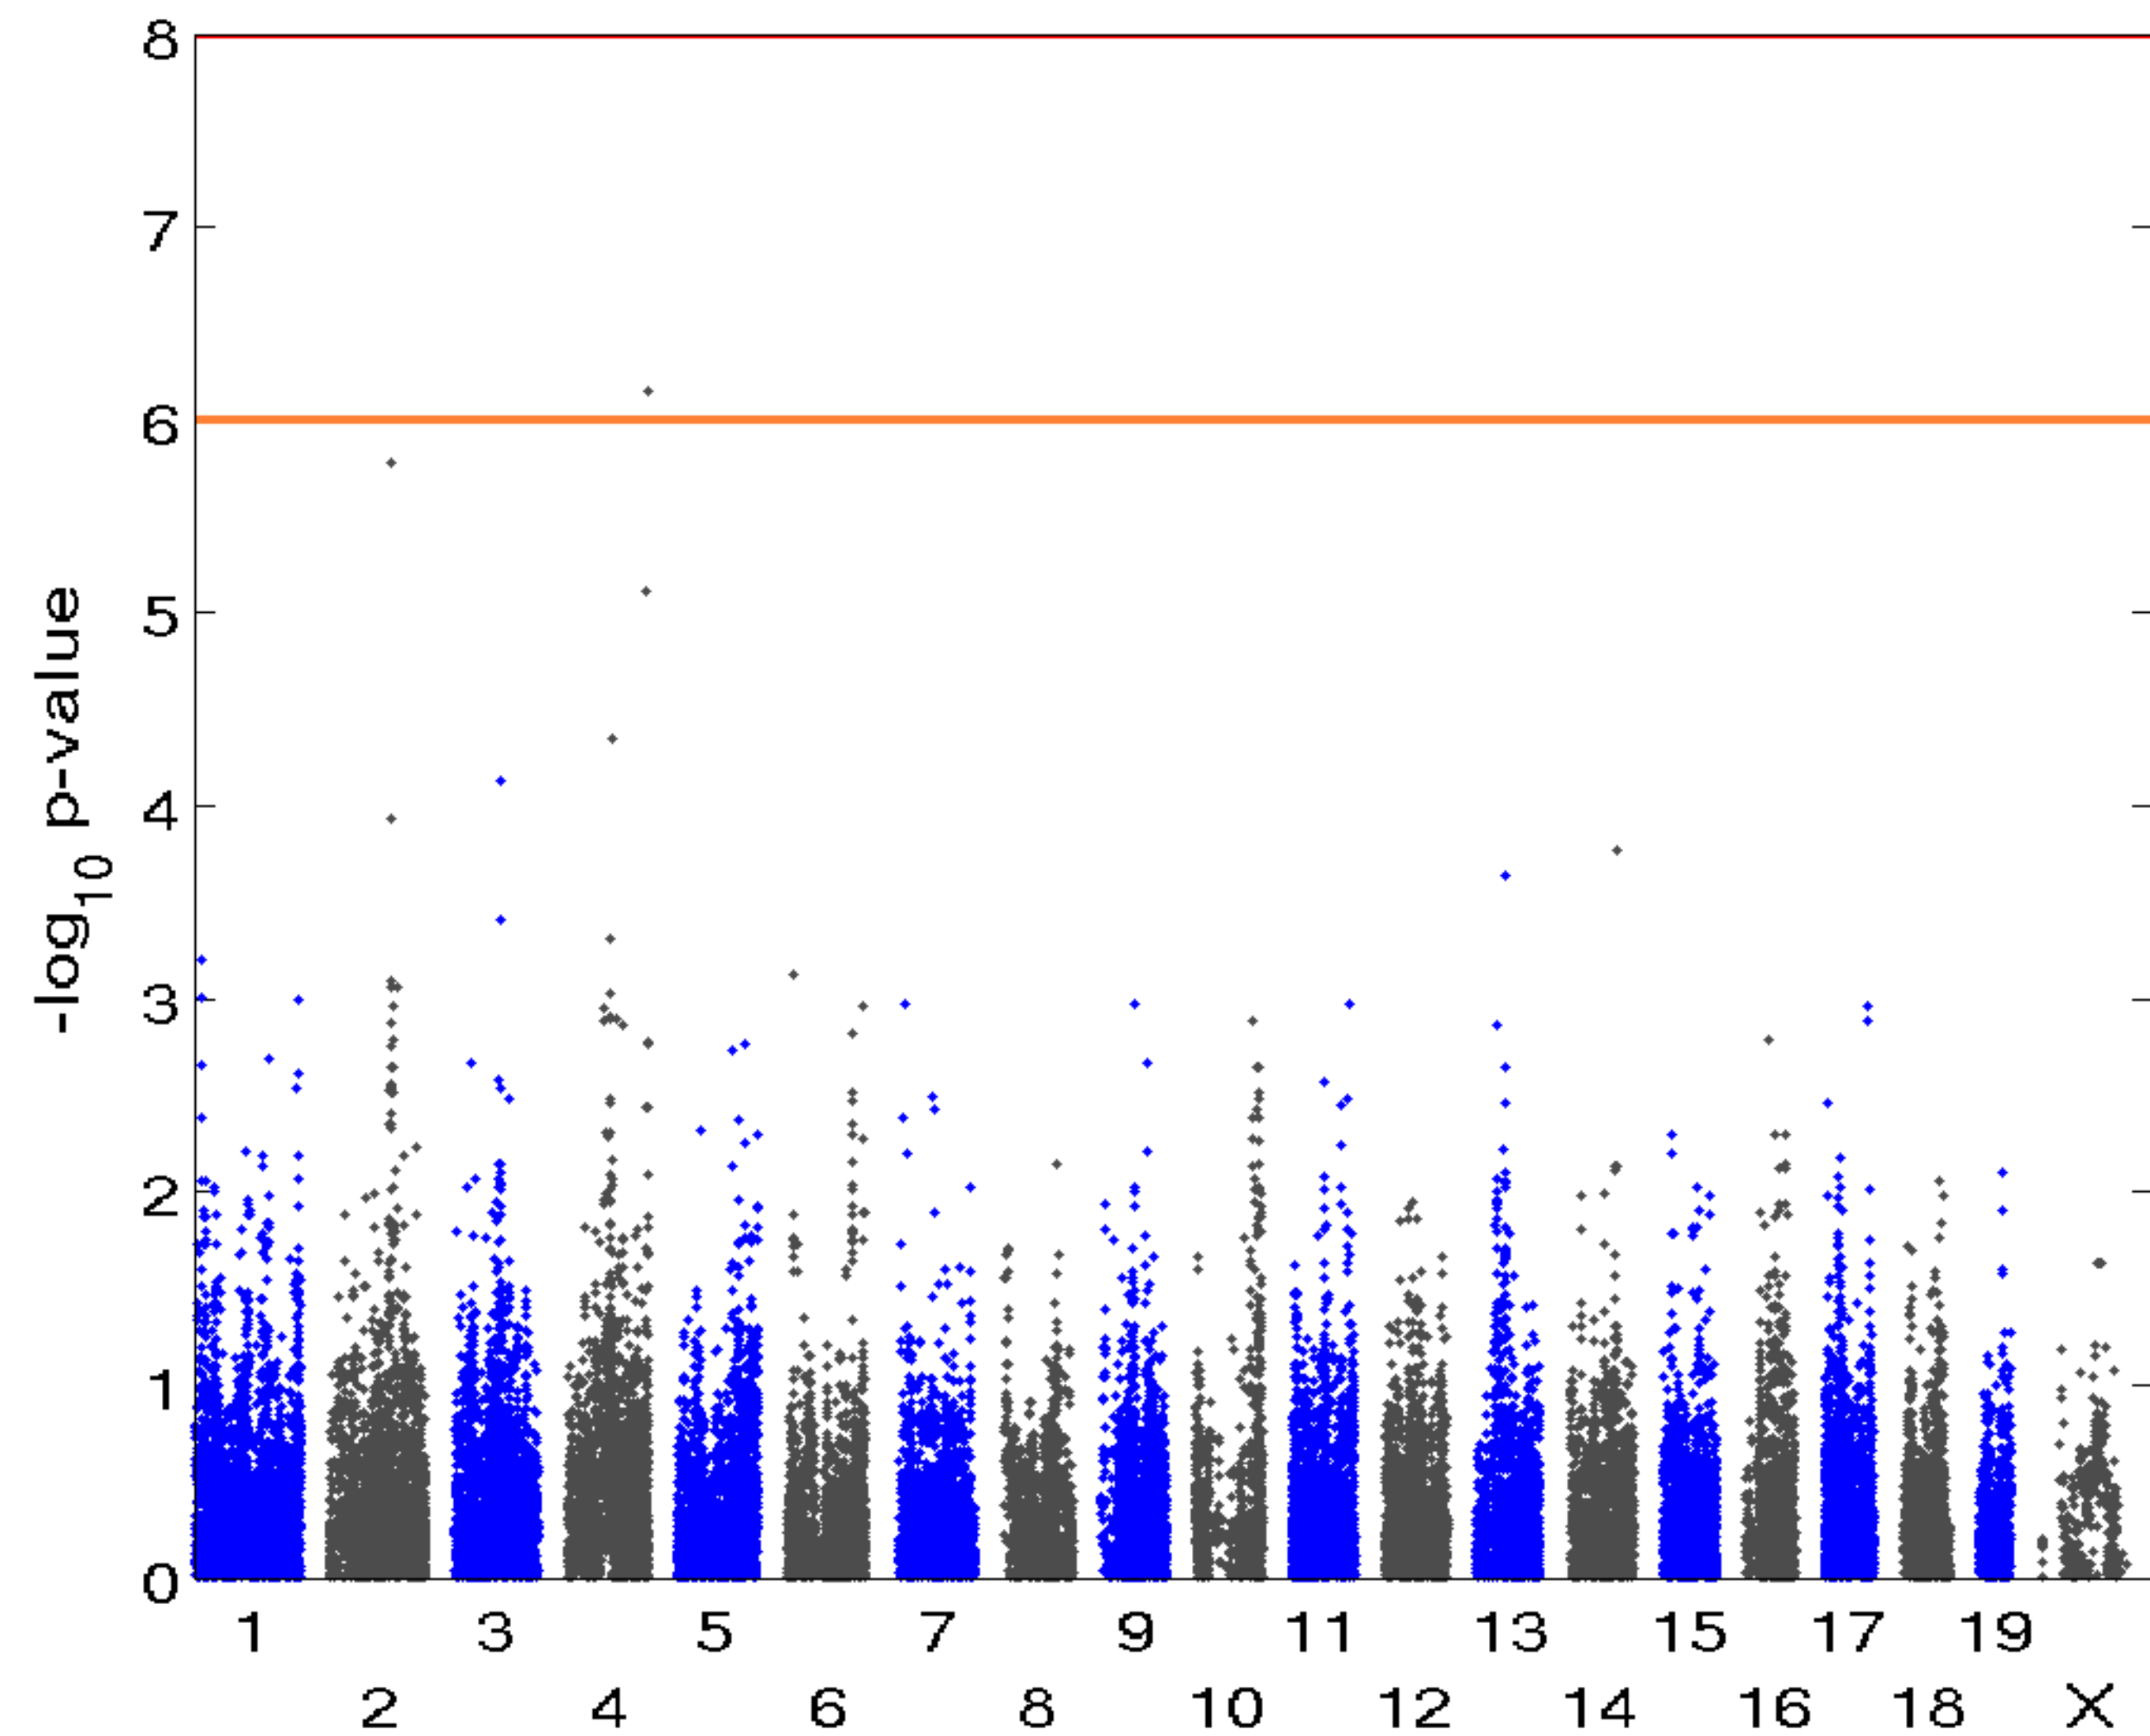

VWI - iso10

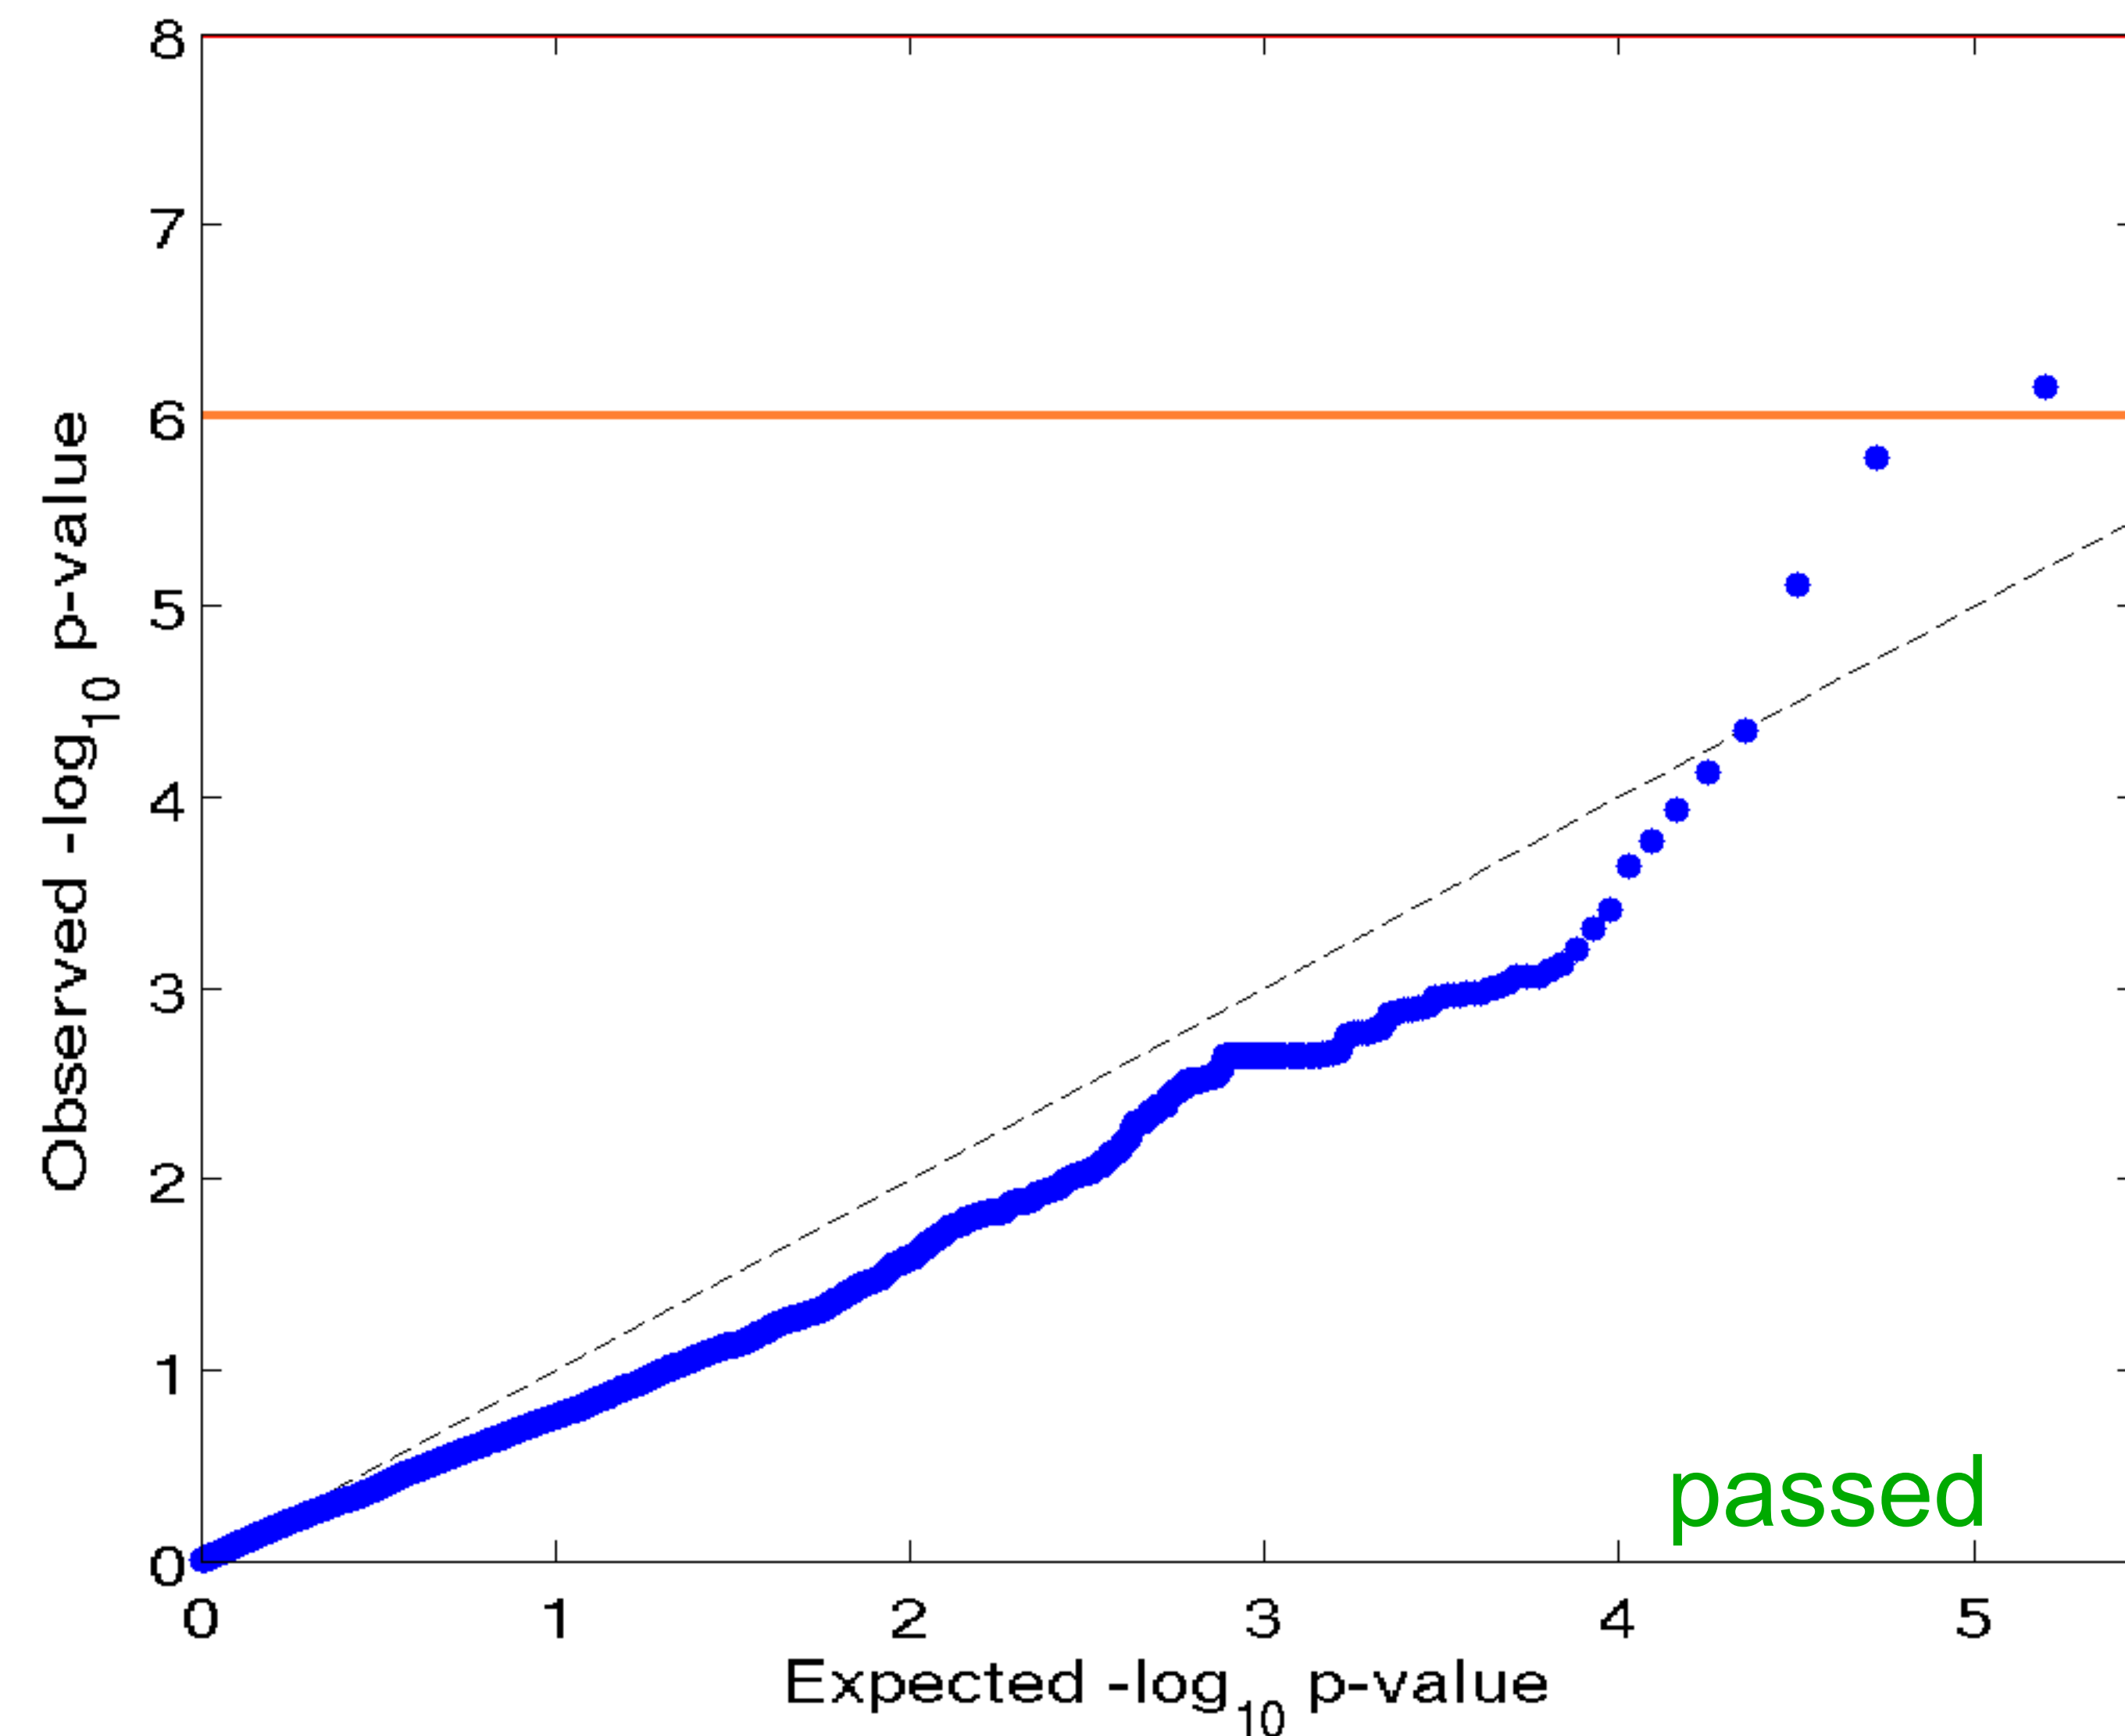

VW - iso10

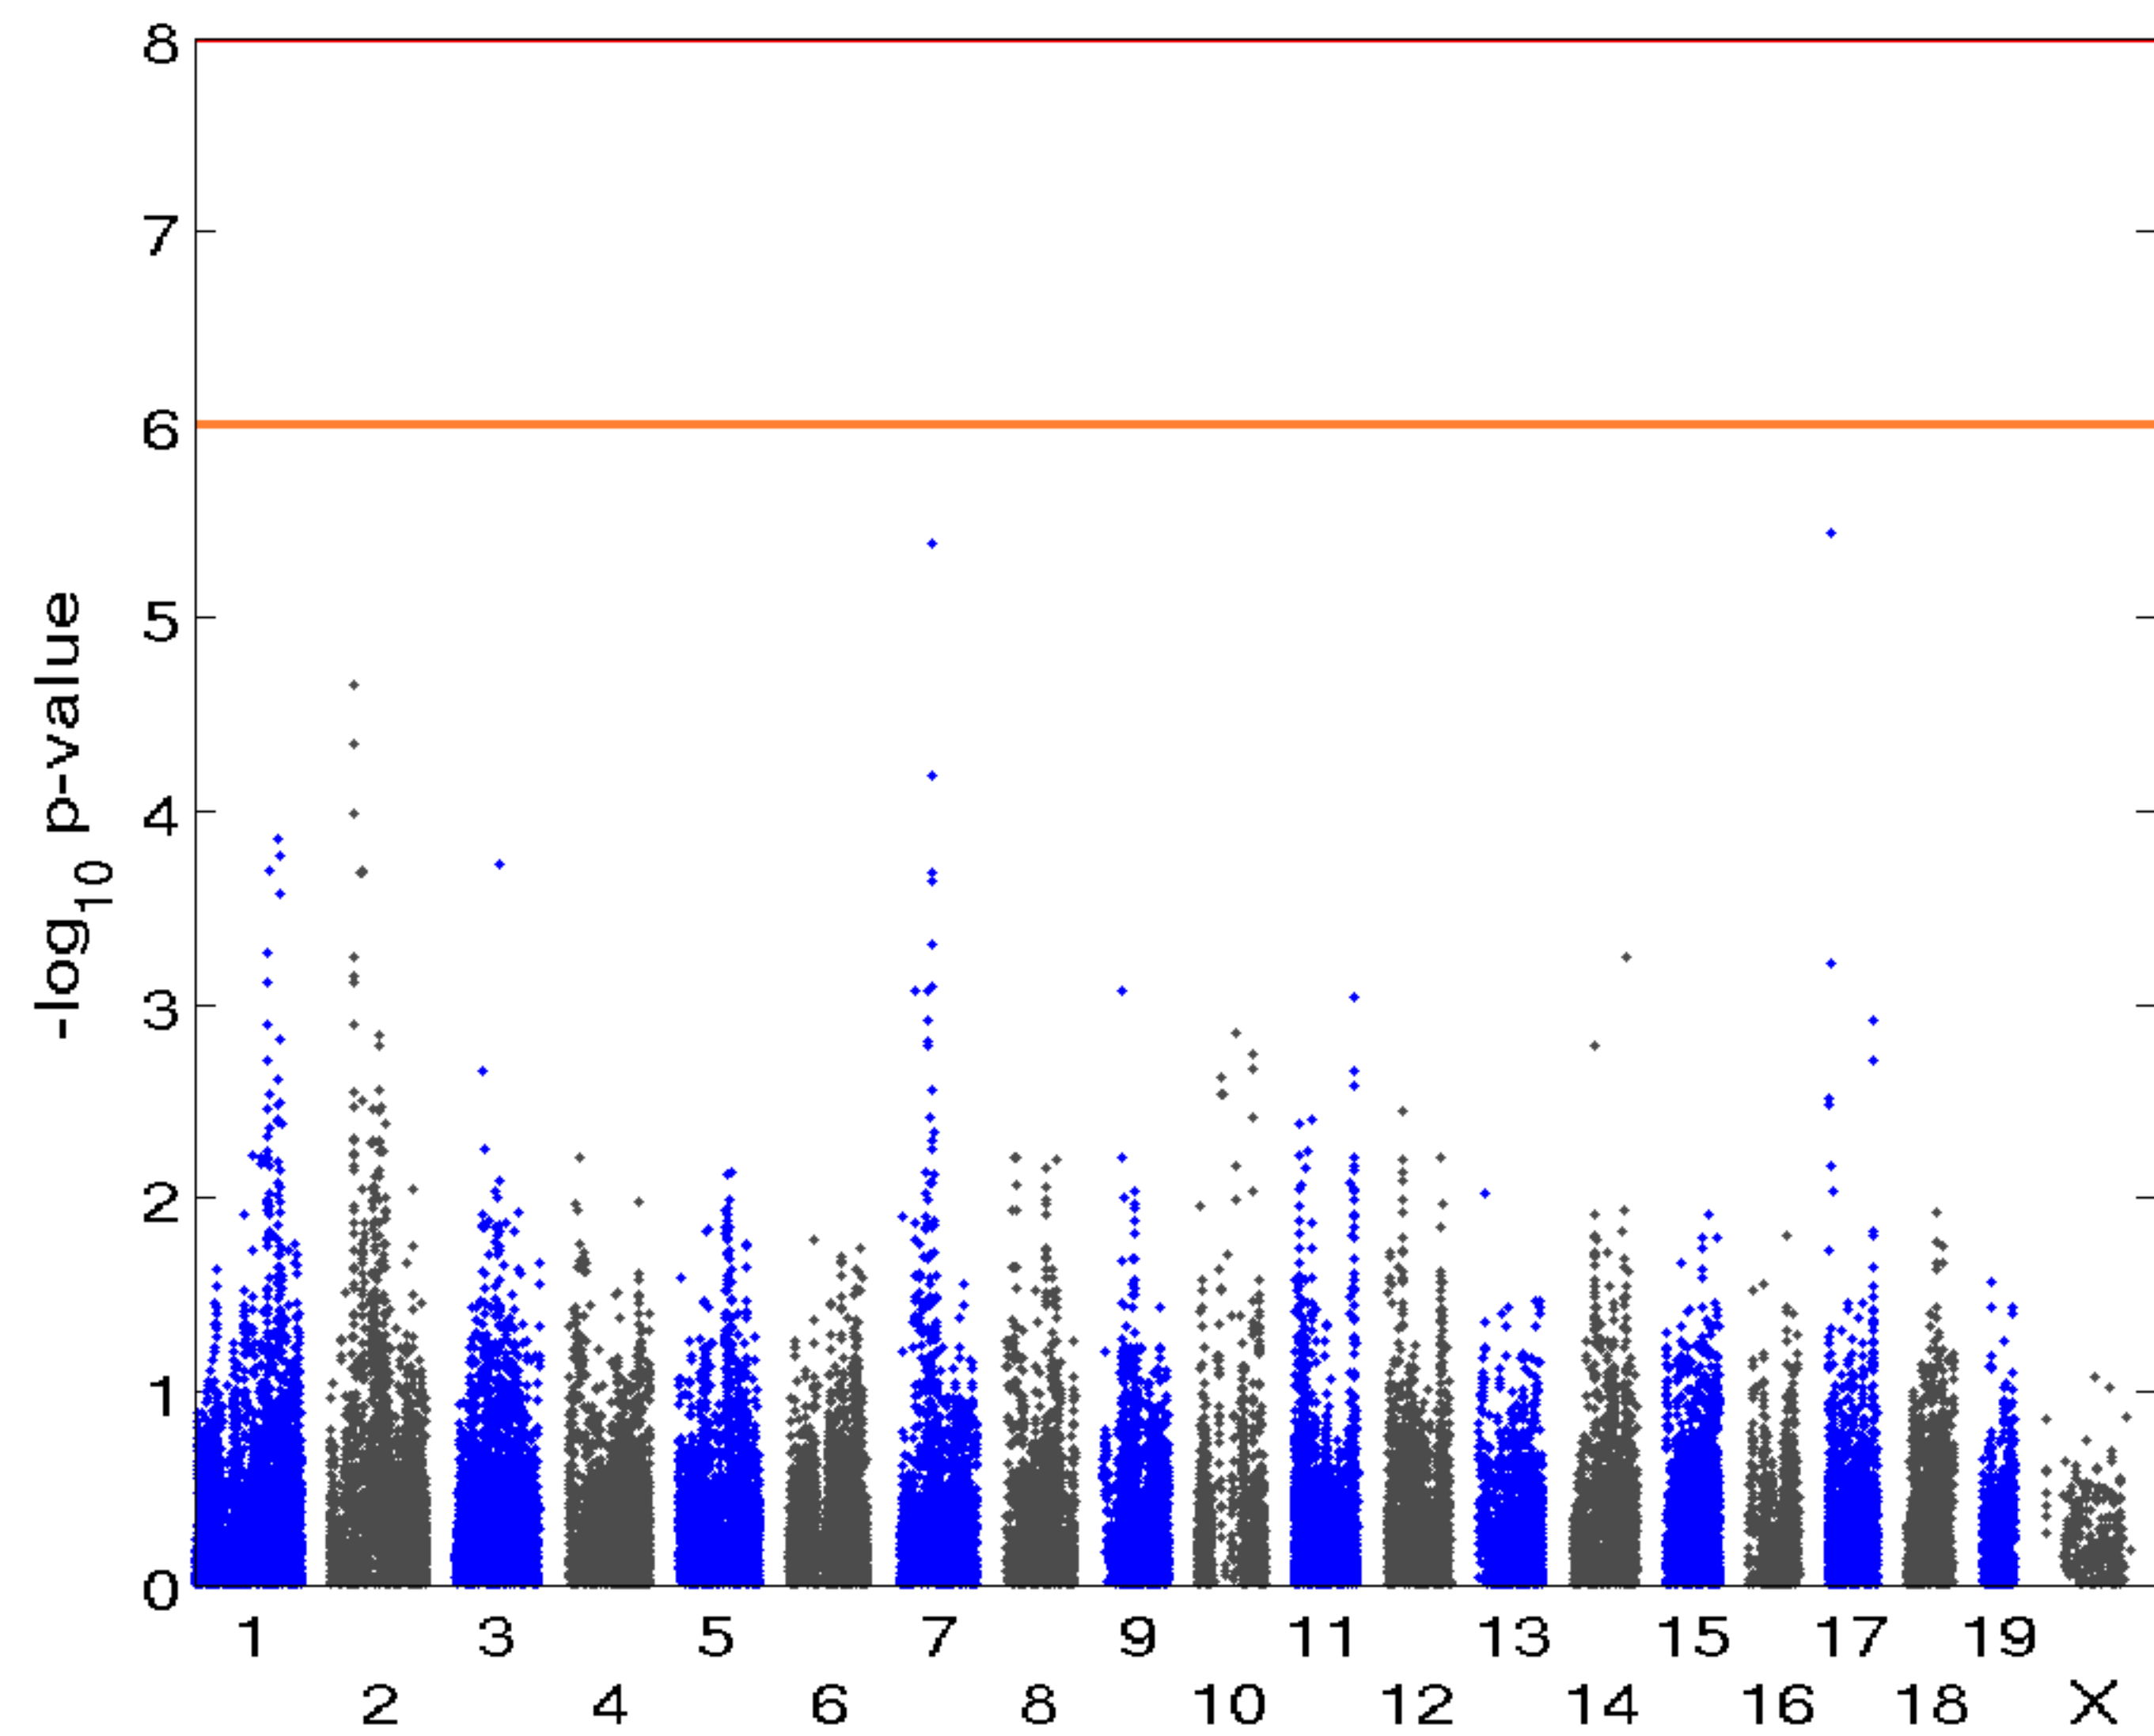

VW - iso10

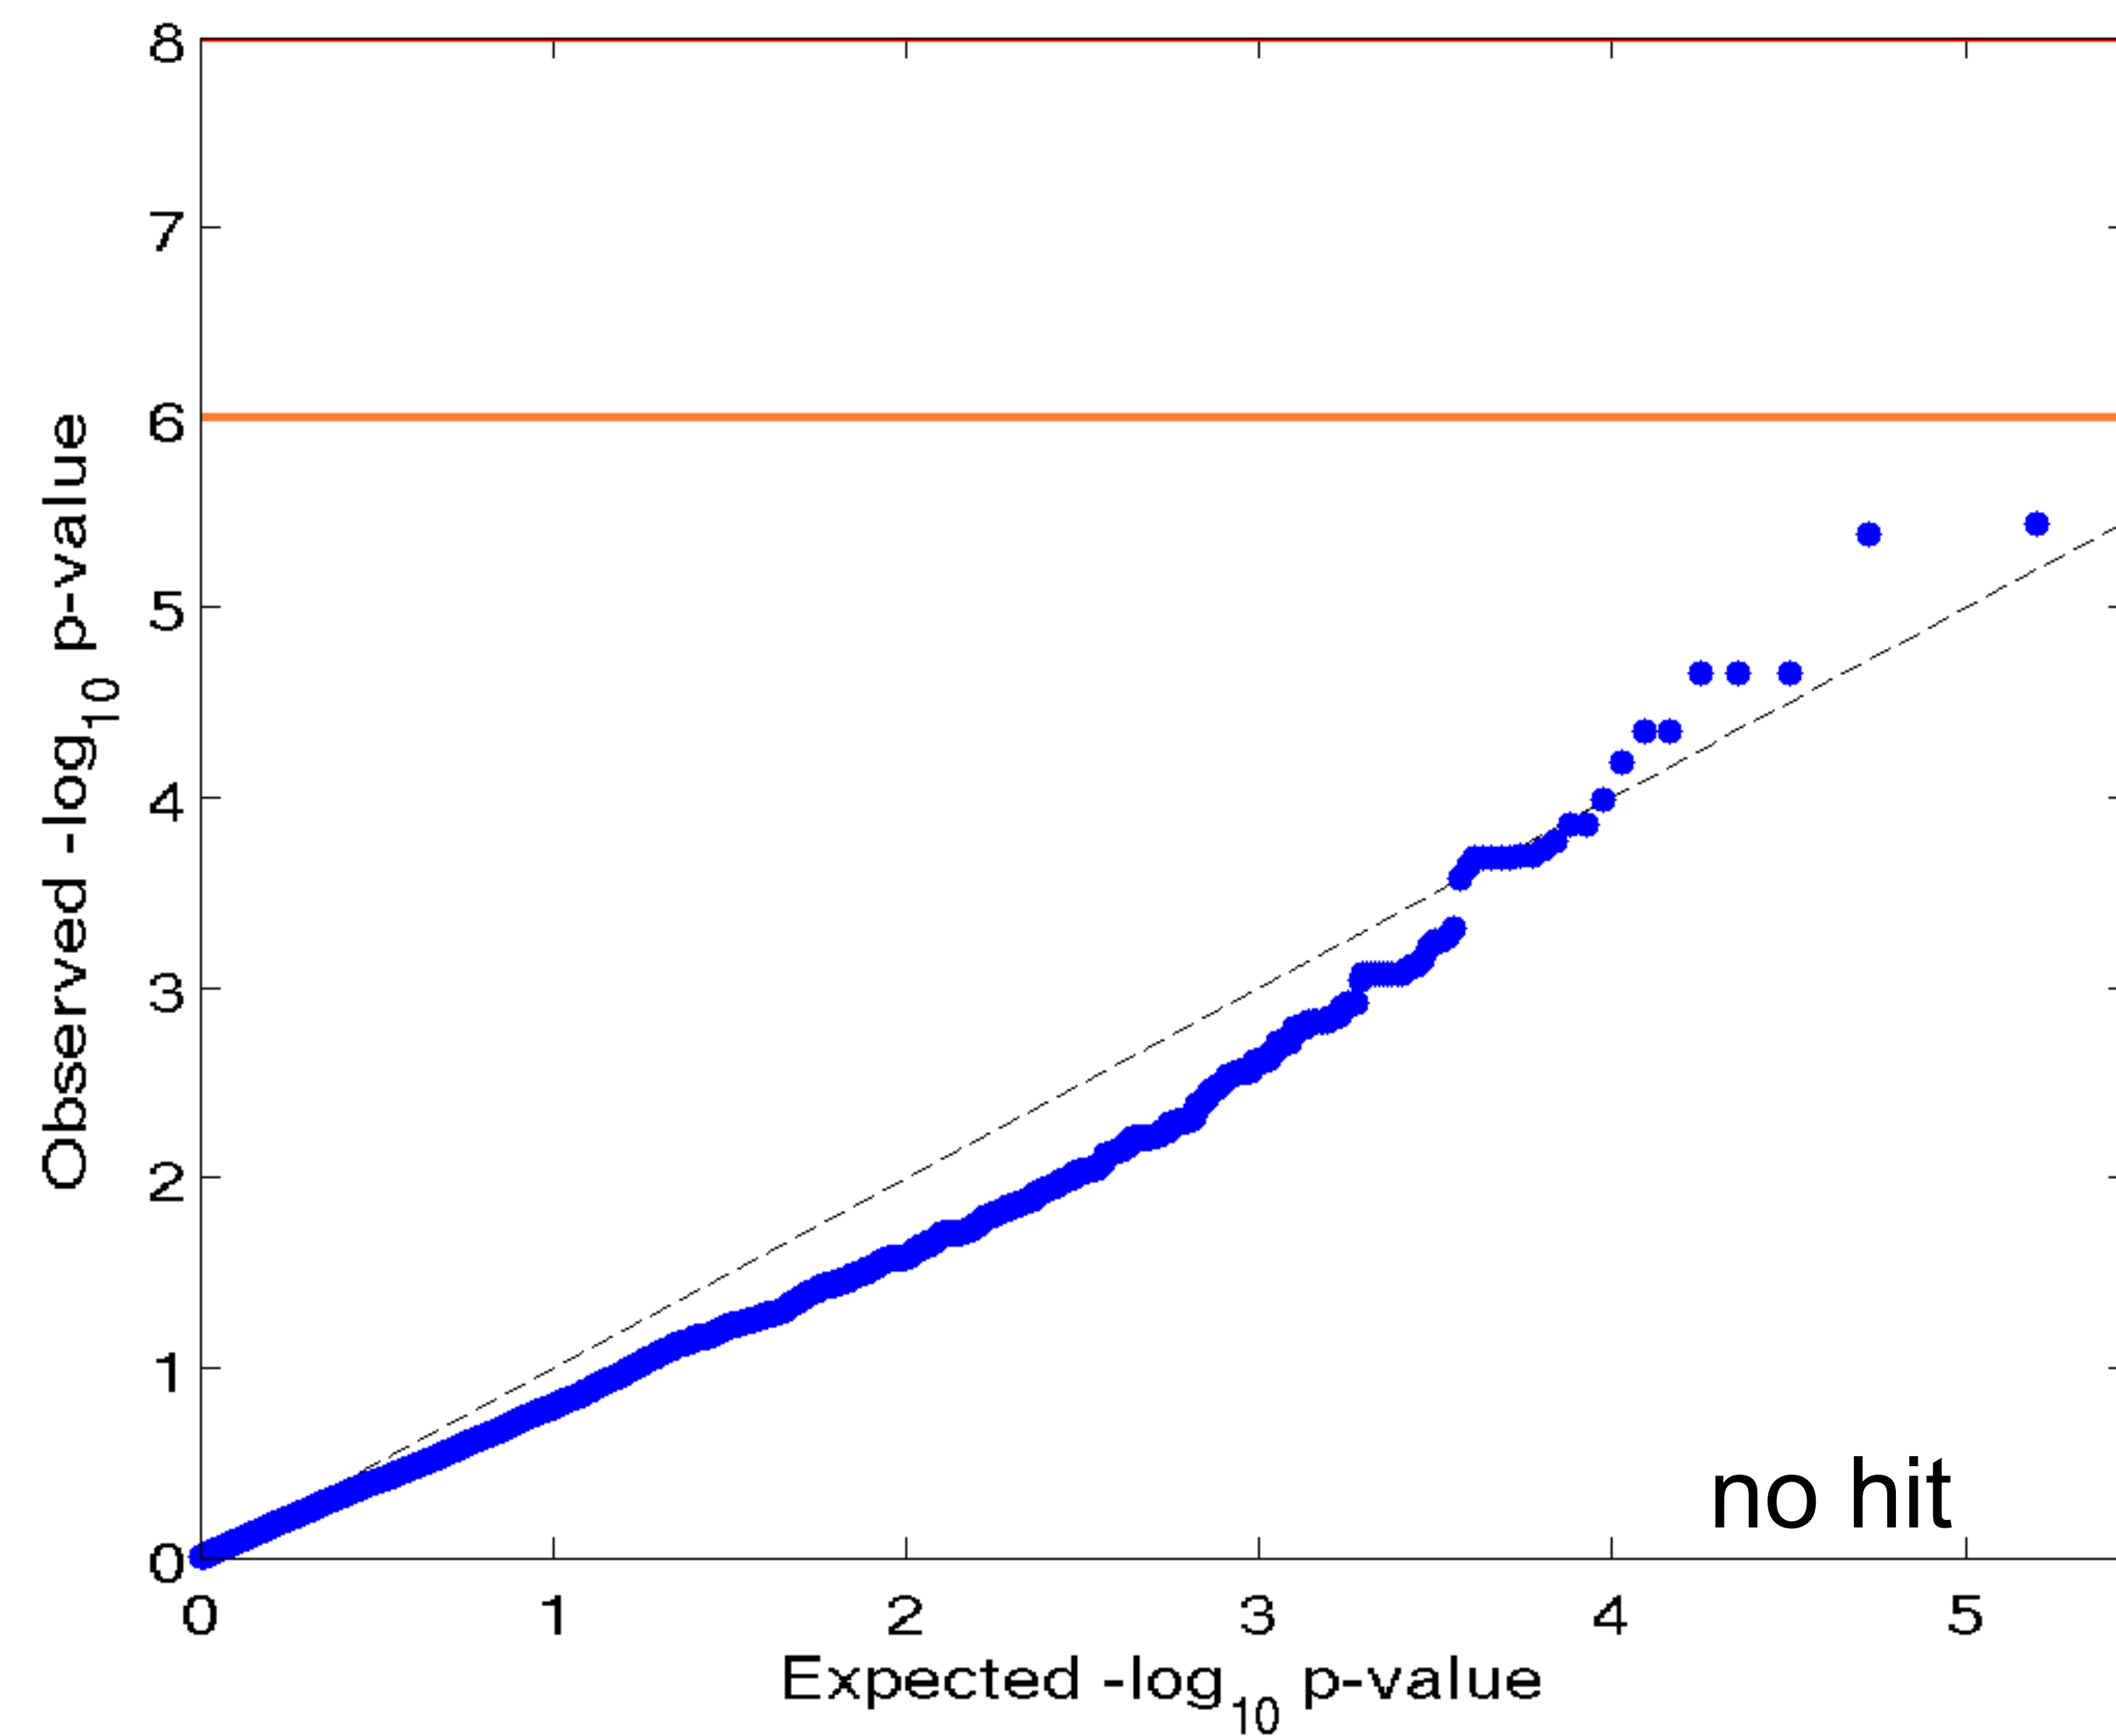

Supplement: S4 (10.1371/journal.pone.0041032.s004) [file journal.pone.0041032.s004]
