# Supplementary material for: Mapping Genetic Variants Associated with Beta-Adrenergic Responses in Inbred Mice
Source: PLOS journal article supplement (doi:10.1371/journal.pone.0041032), 2012-07-31

AW/BWS - ate vs ctr

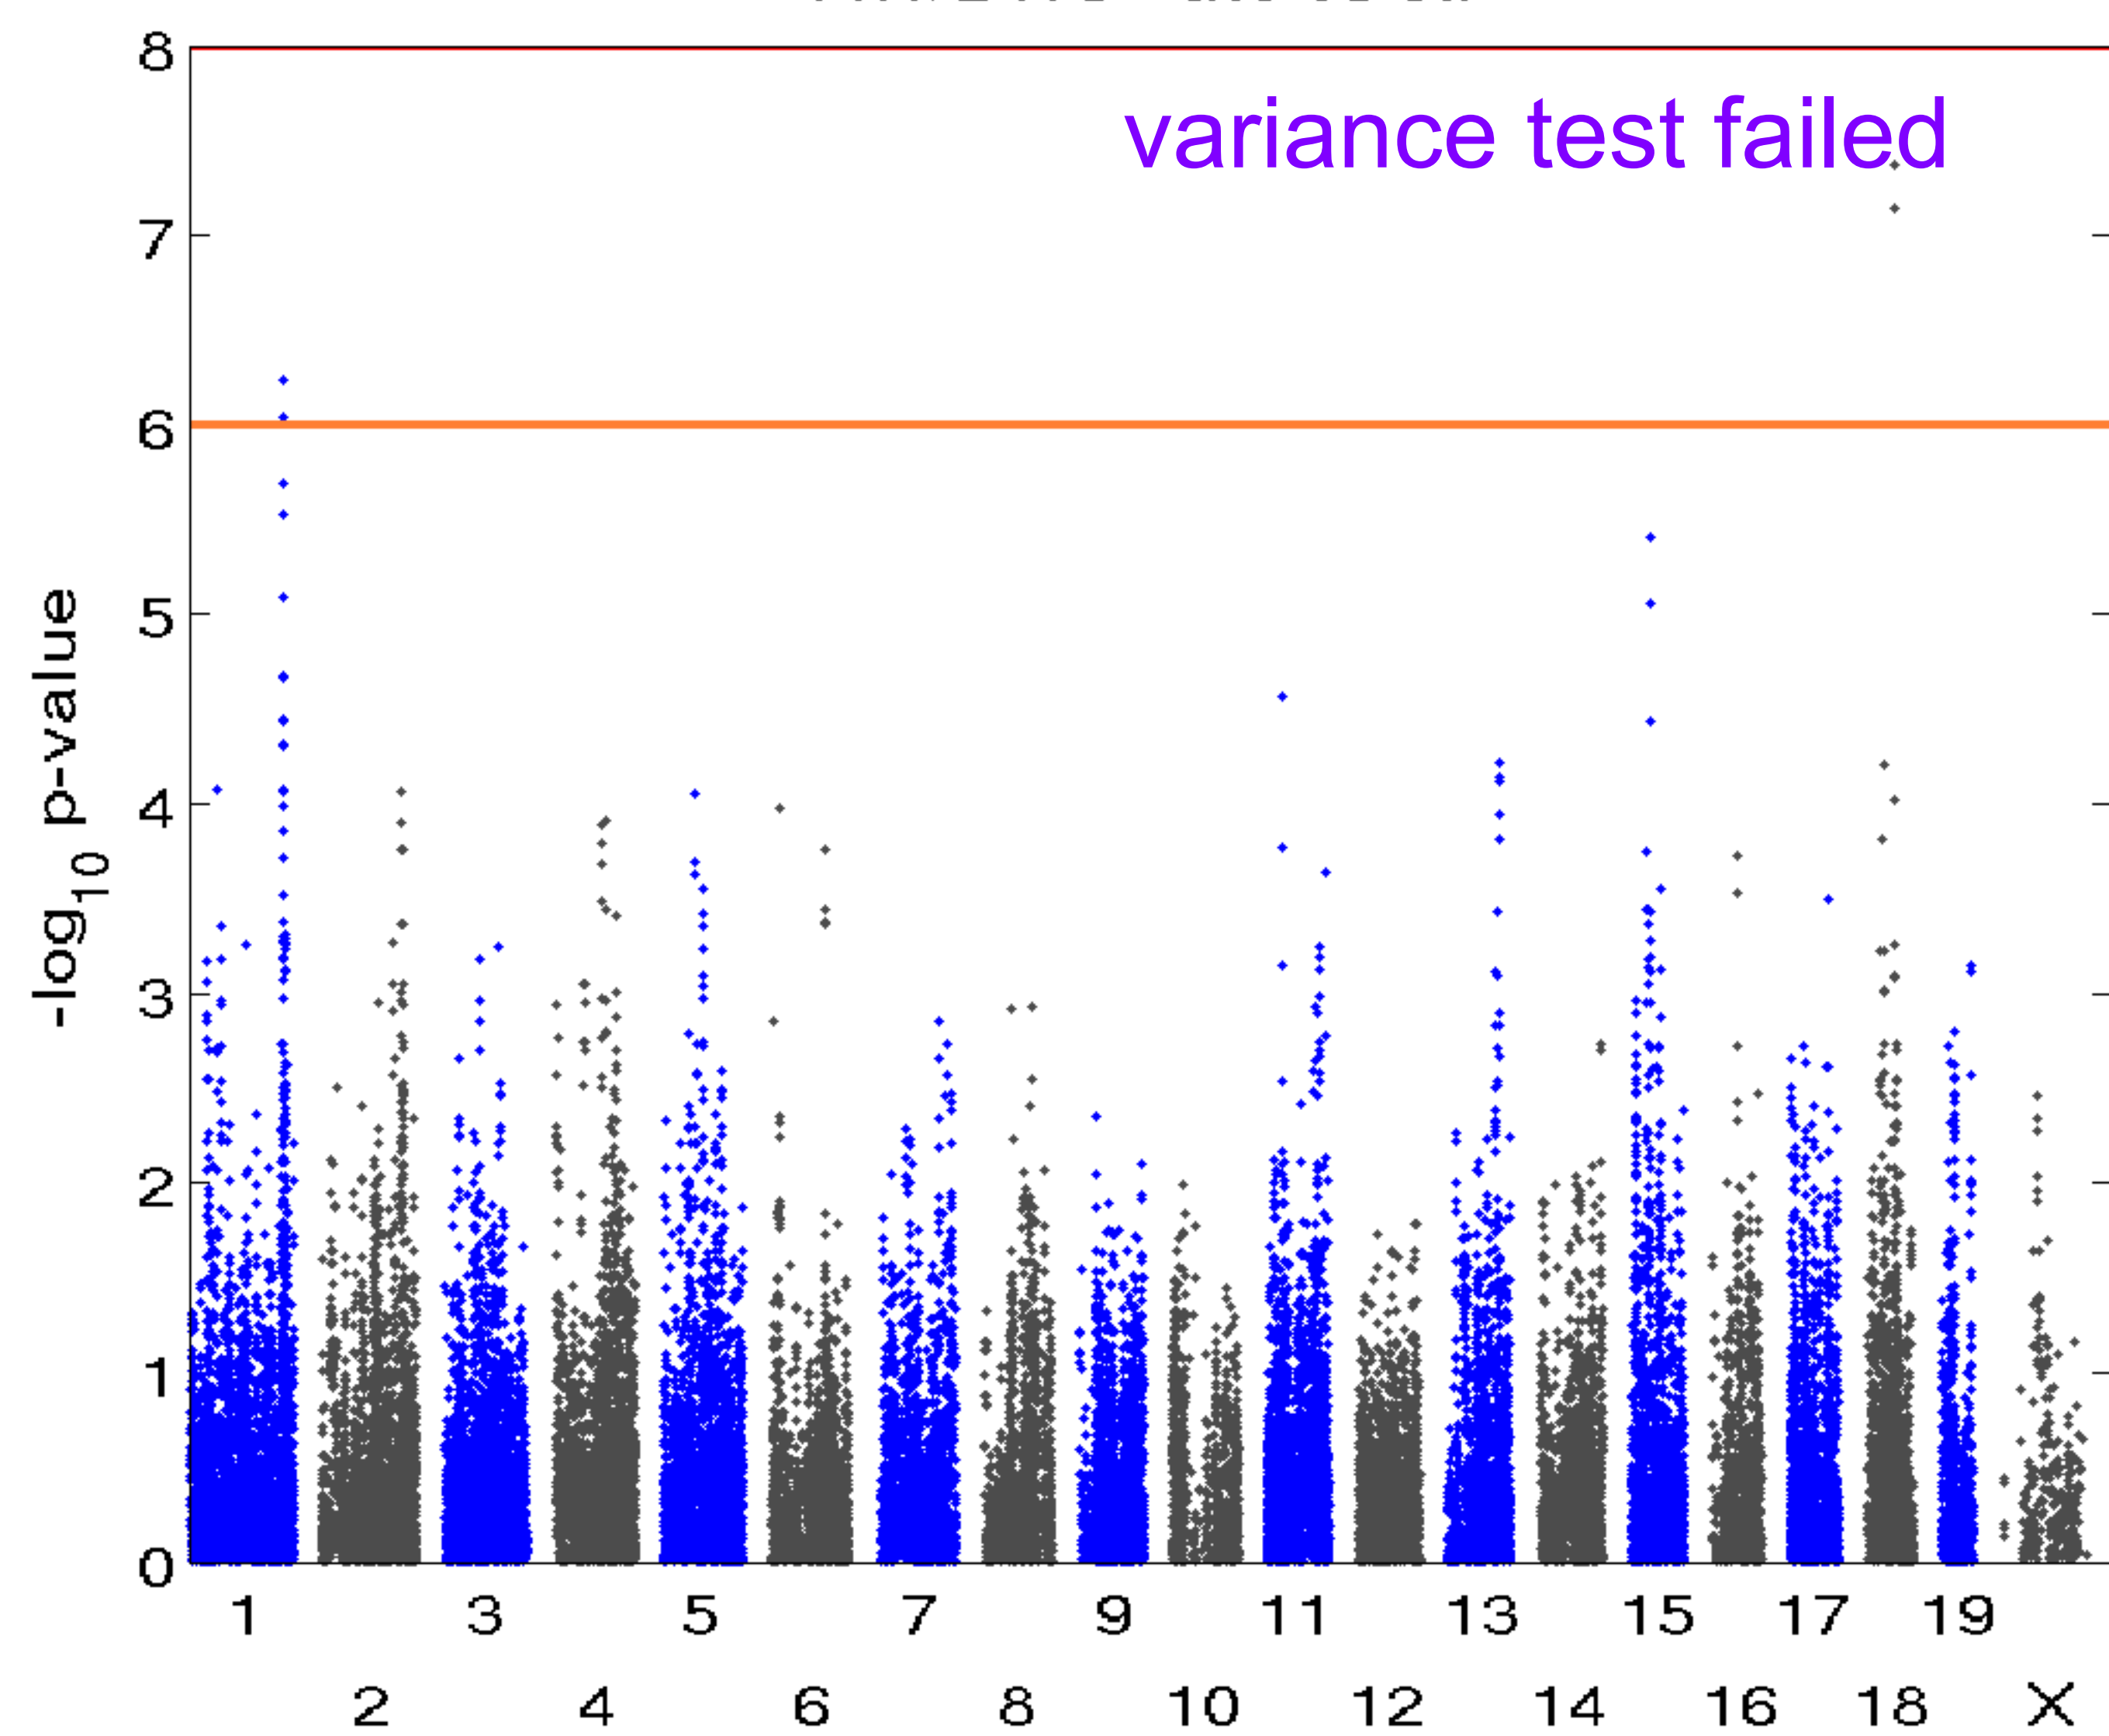

AW/BWS - ate vs ctr

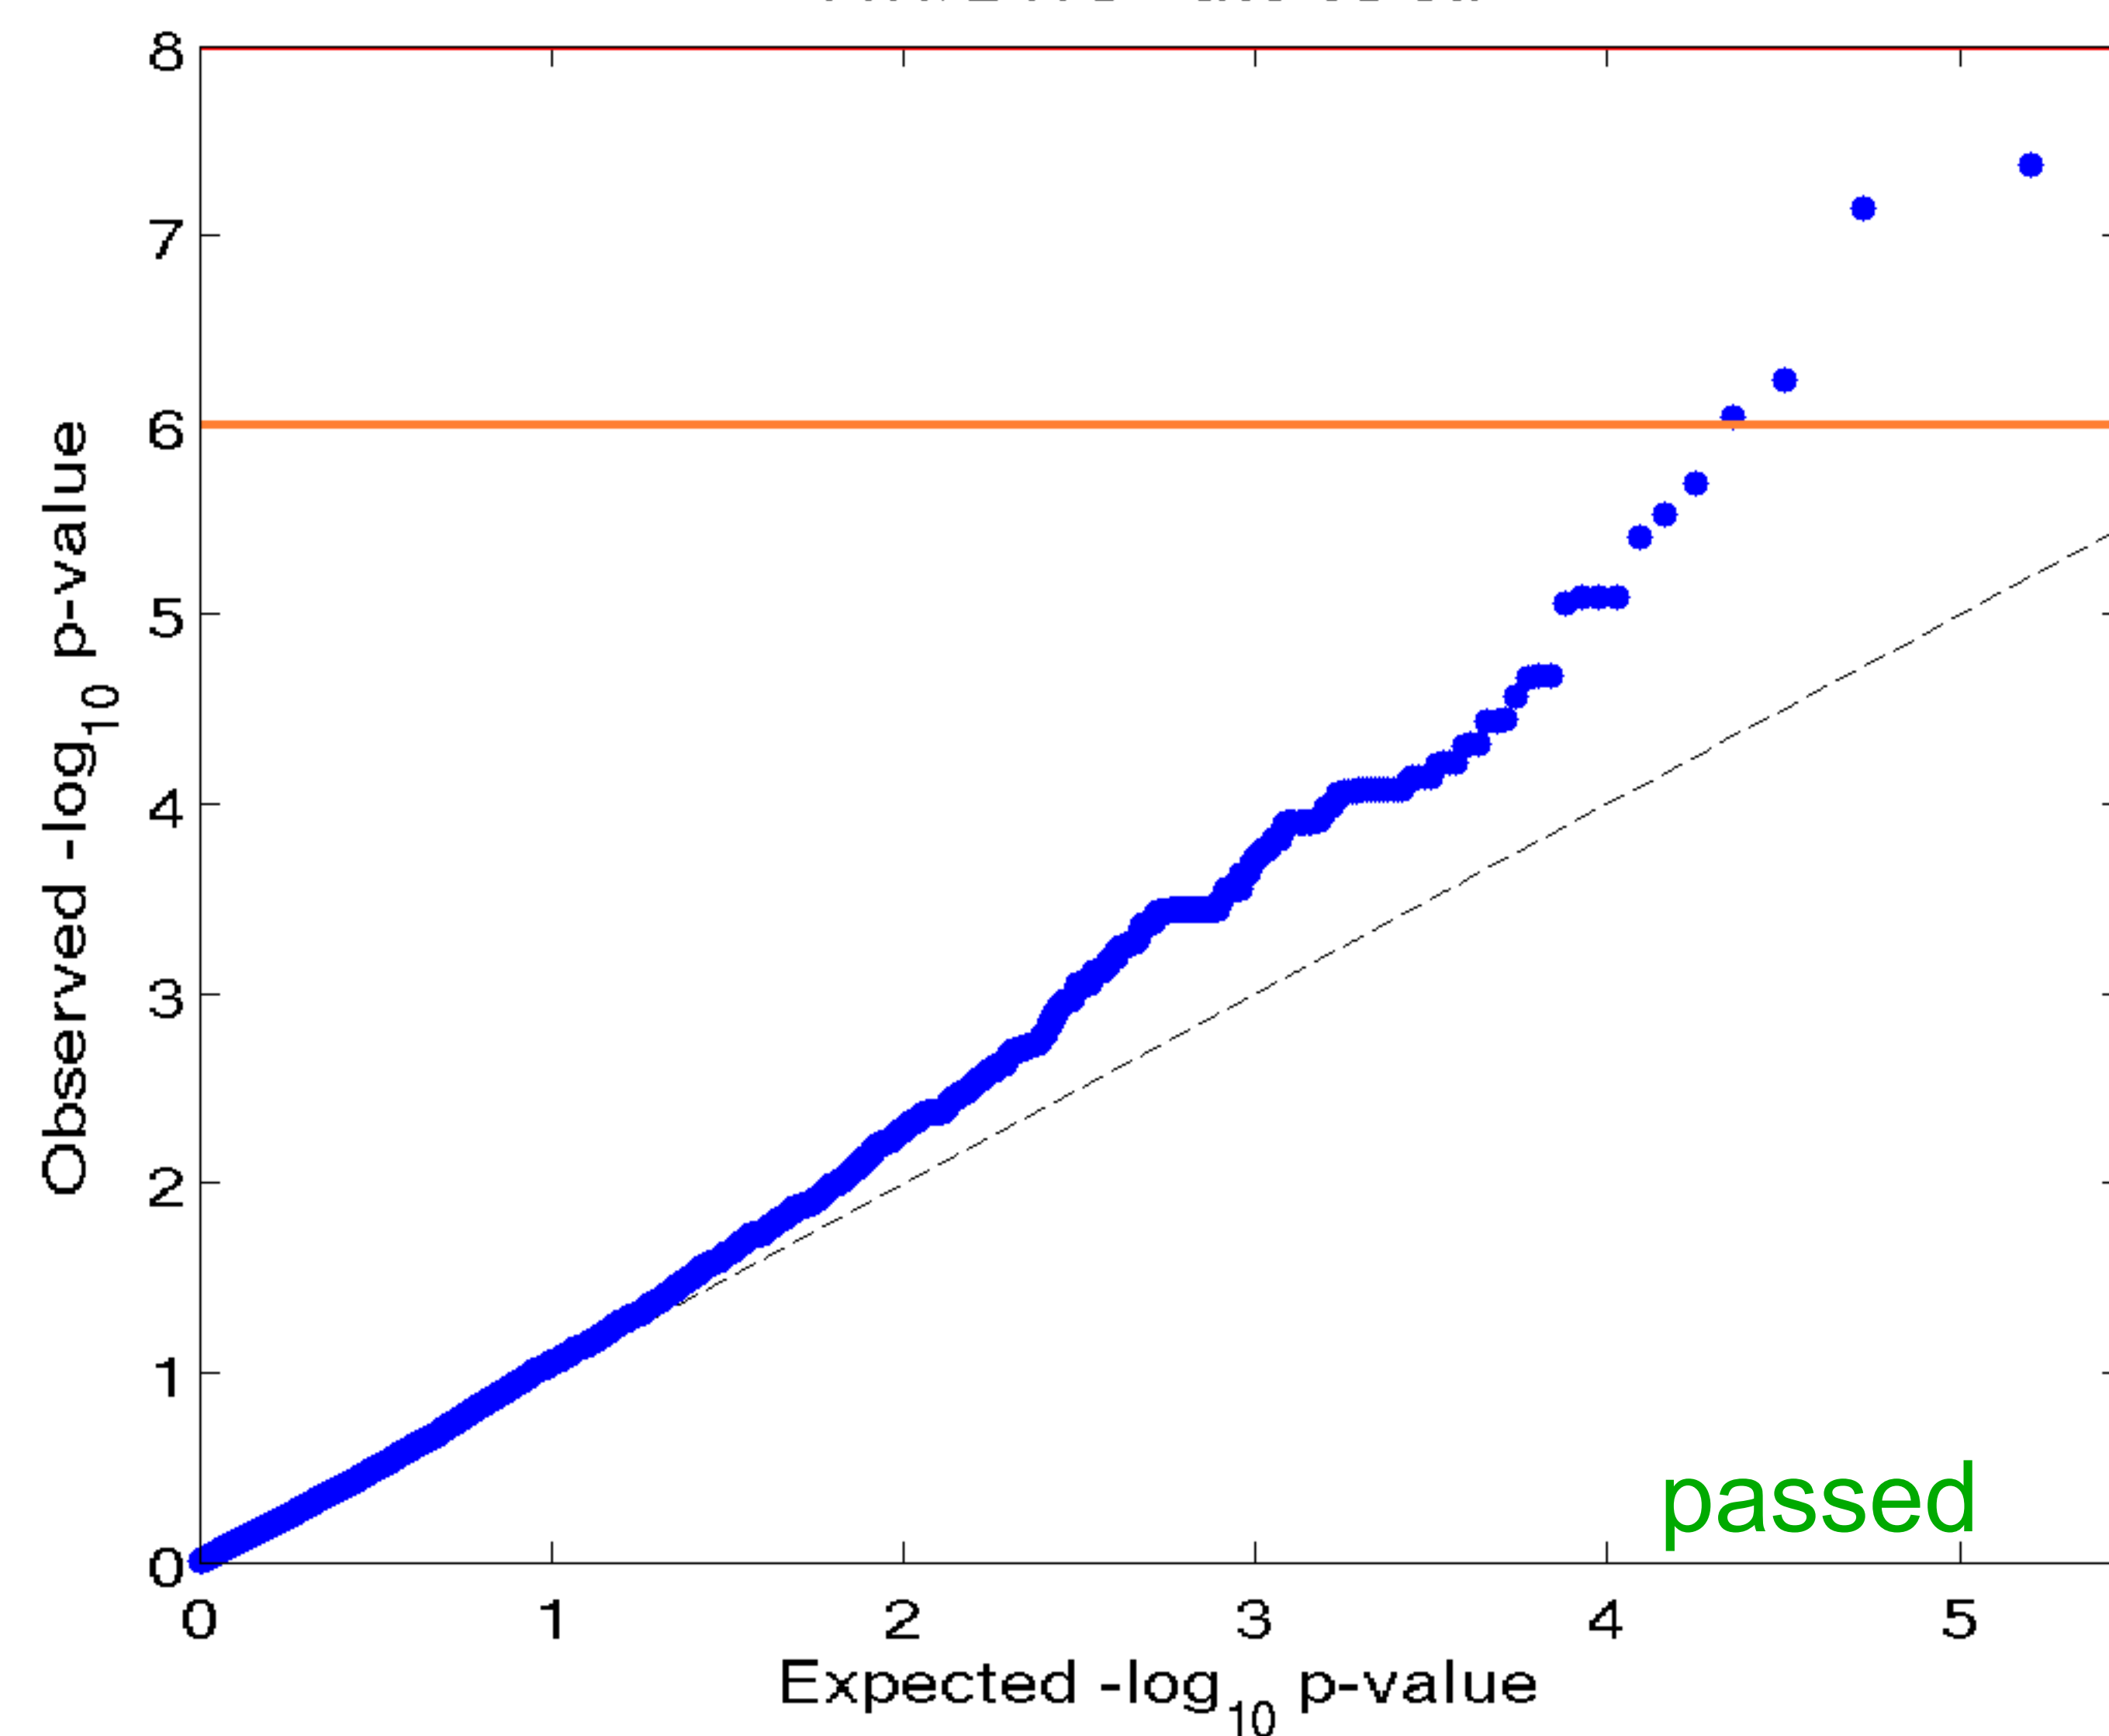

AWI - ate vs ctr

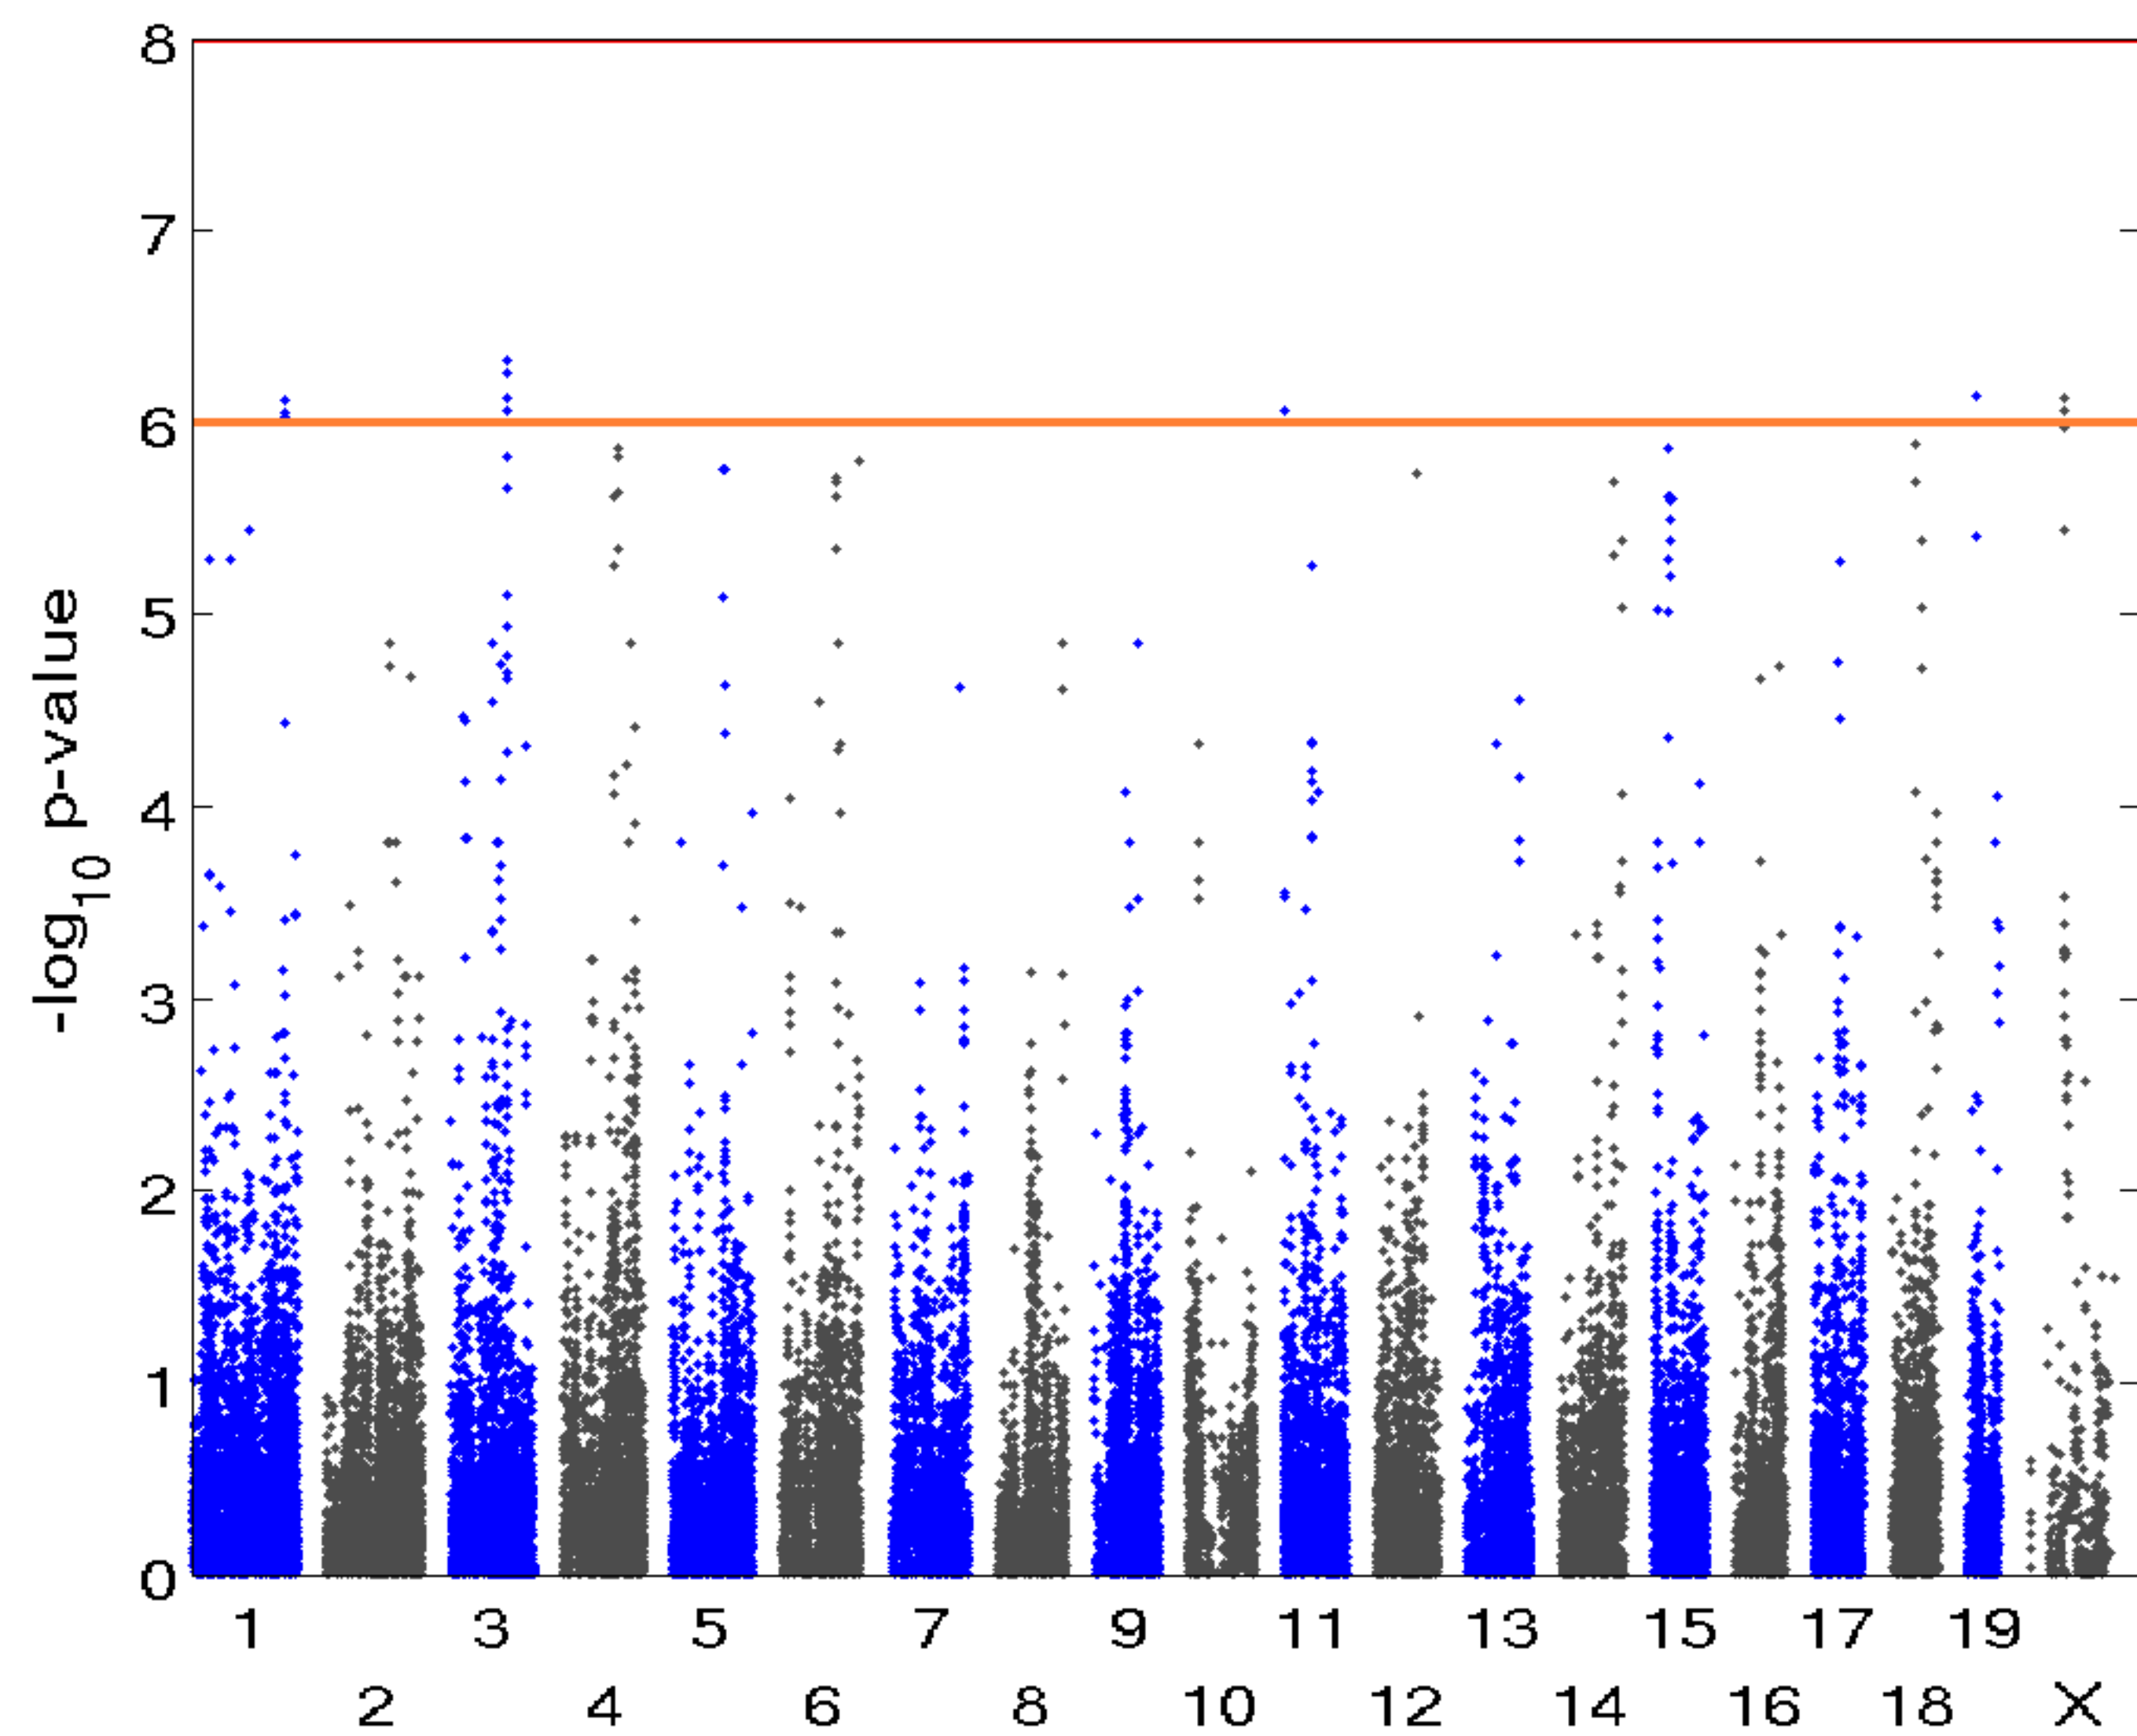

AWI - ate vs ctr

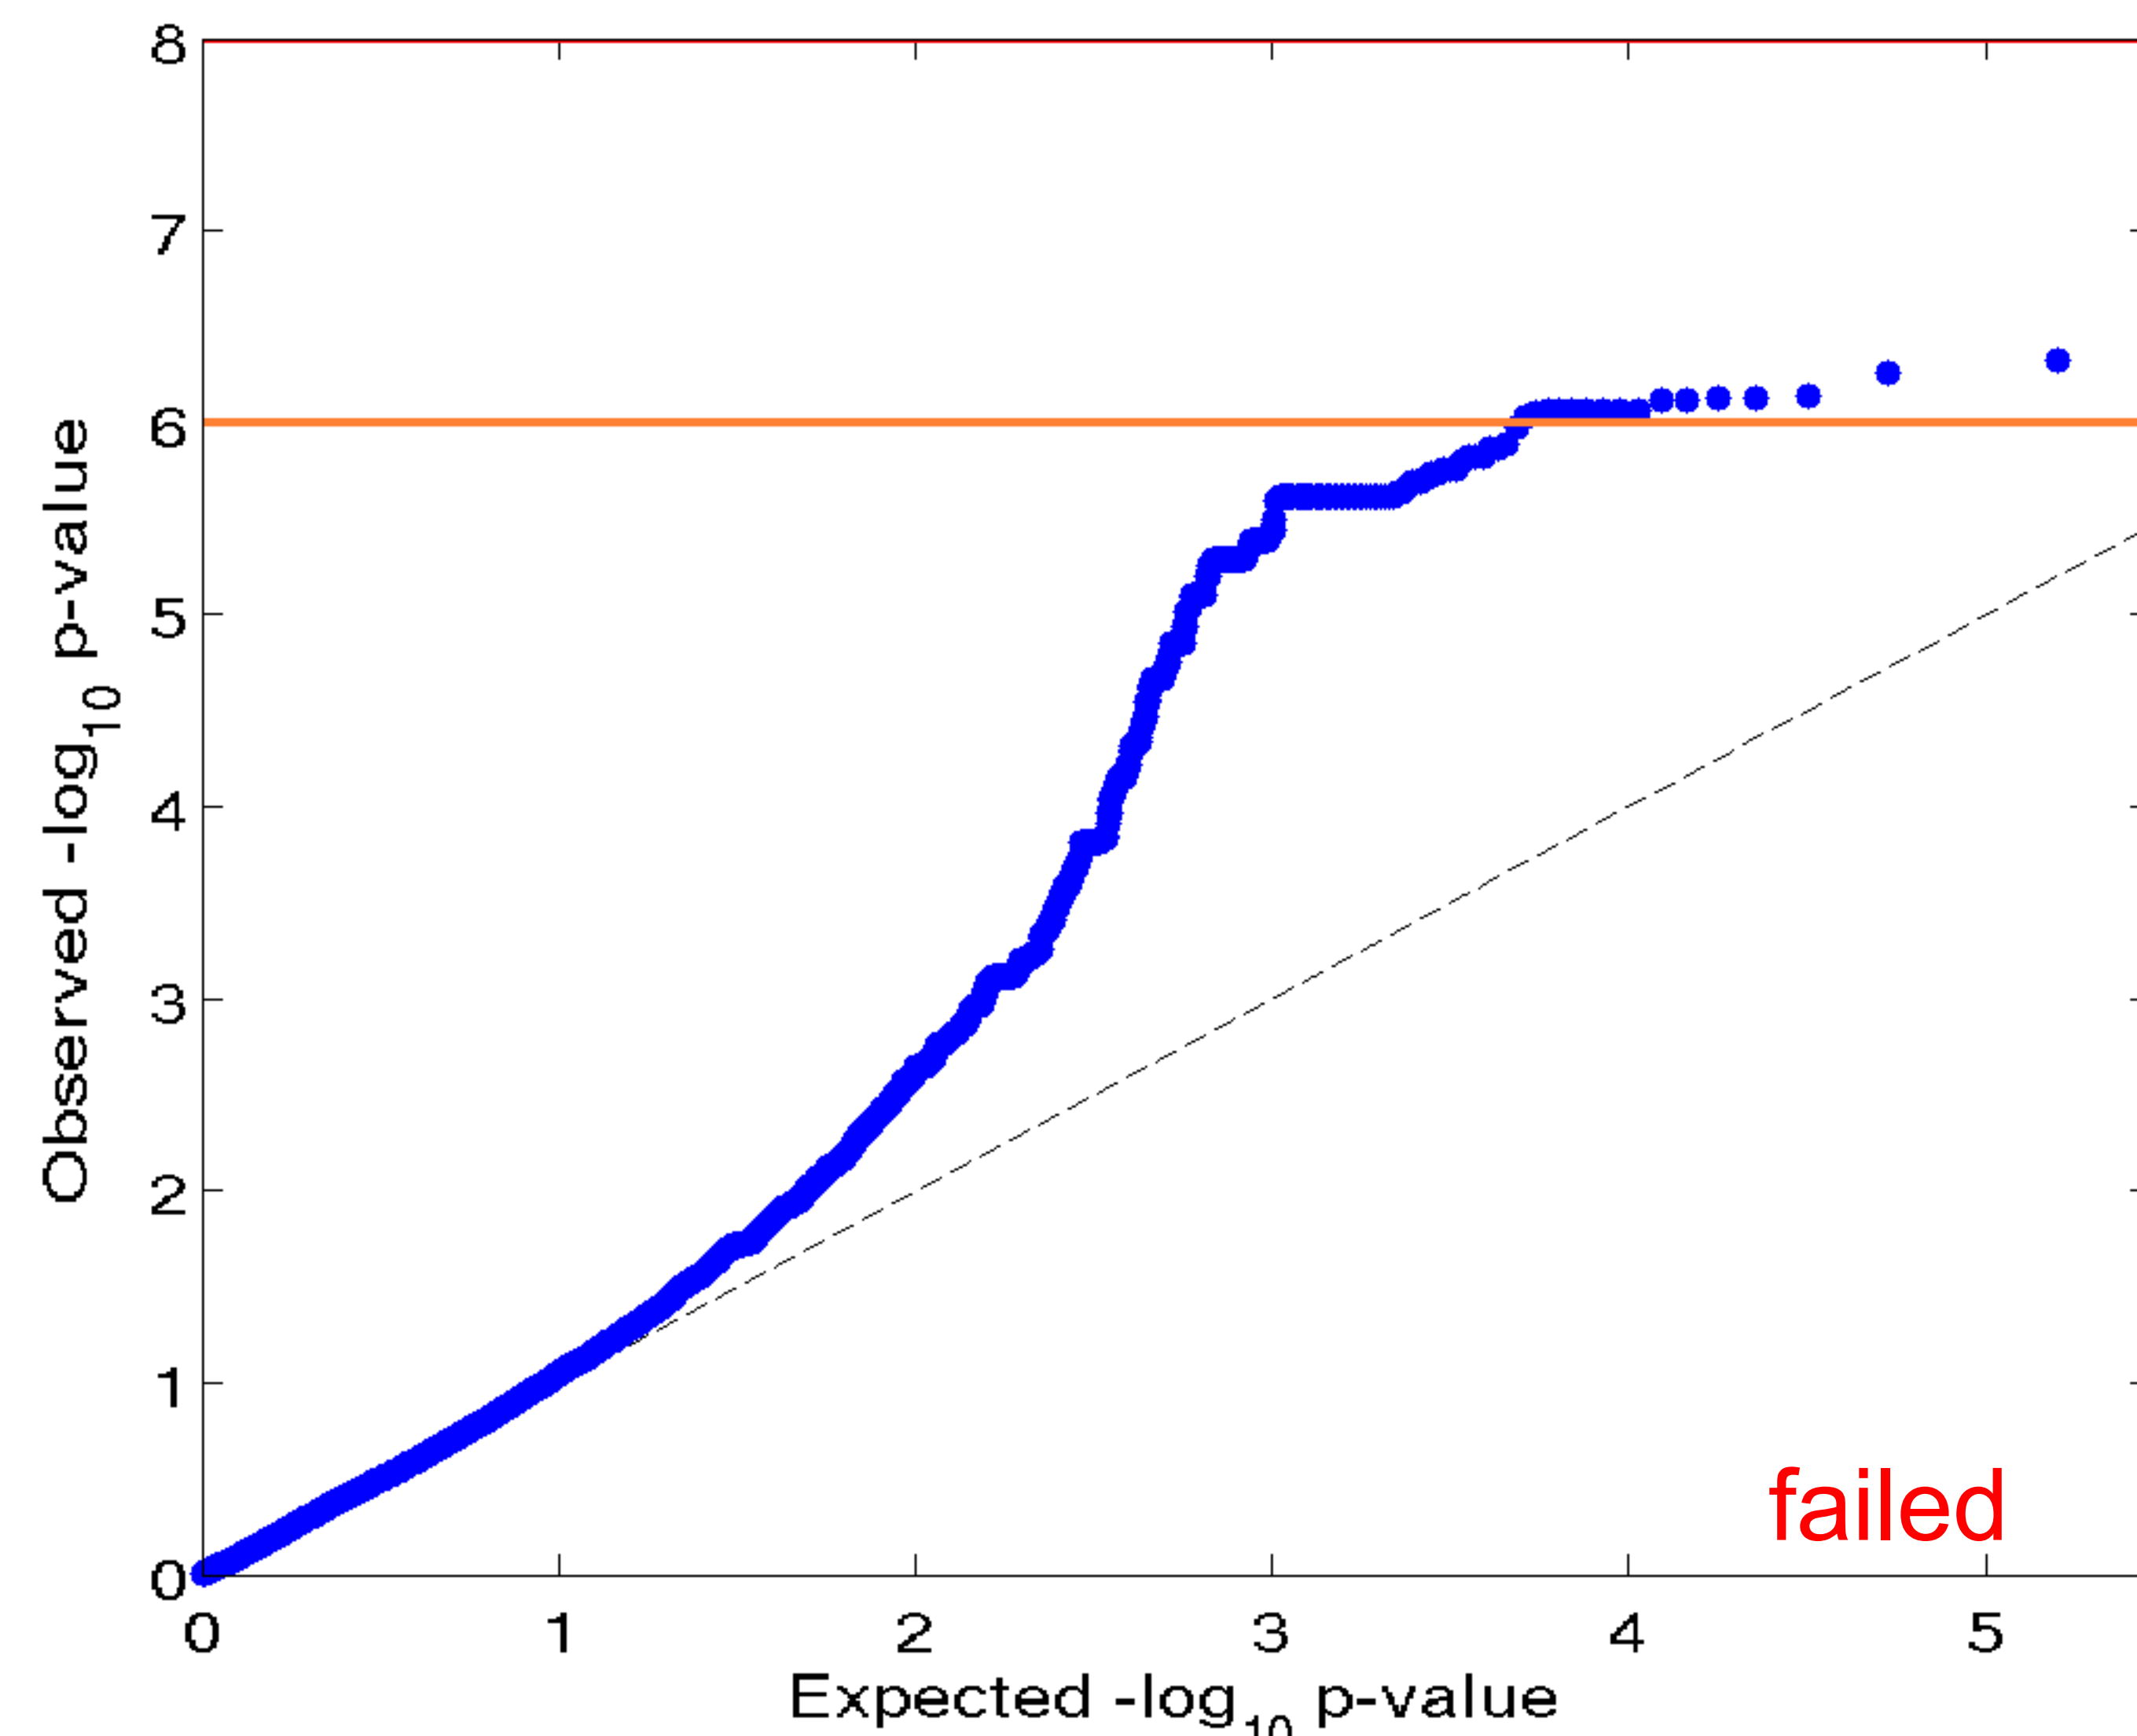

AW - ate vs ctr

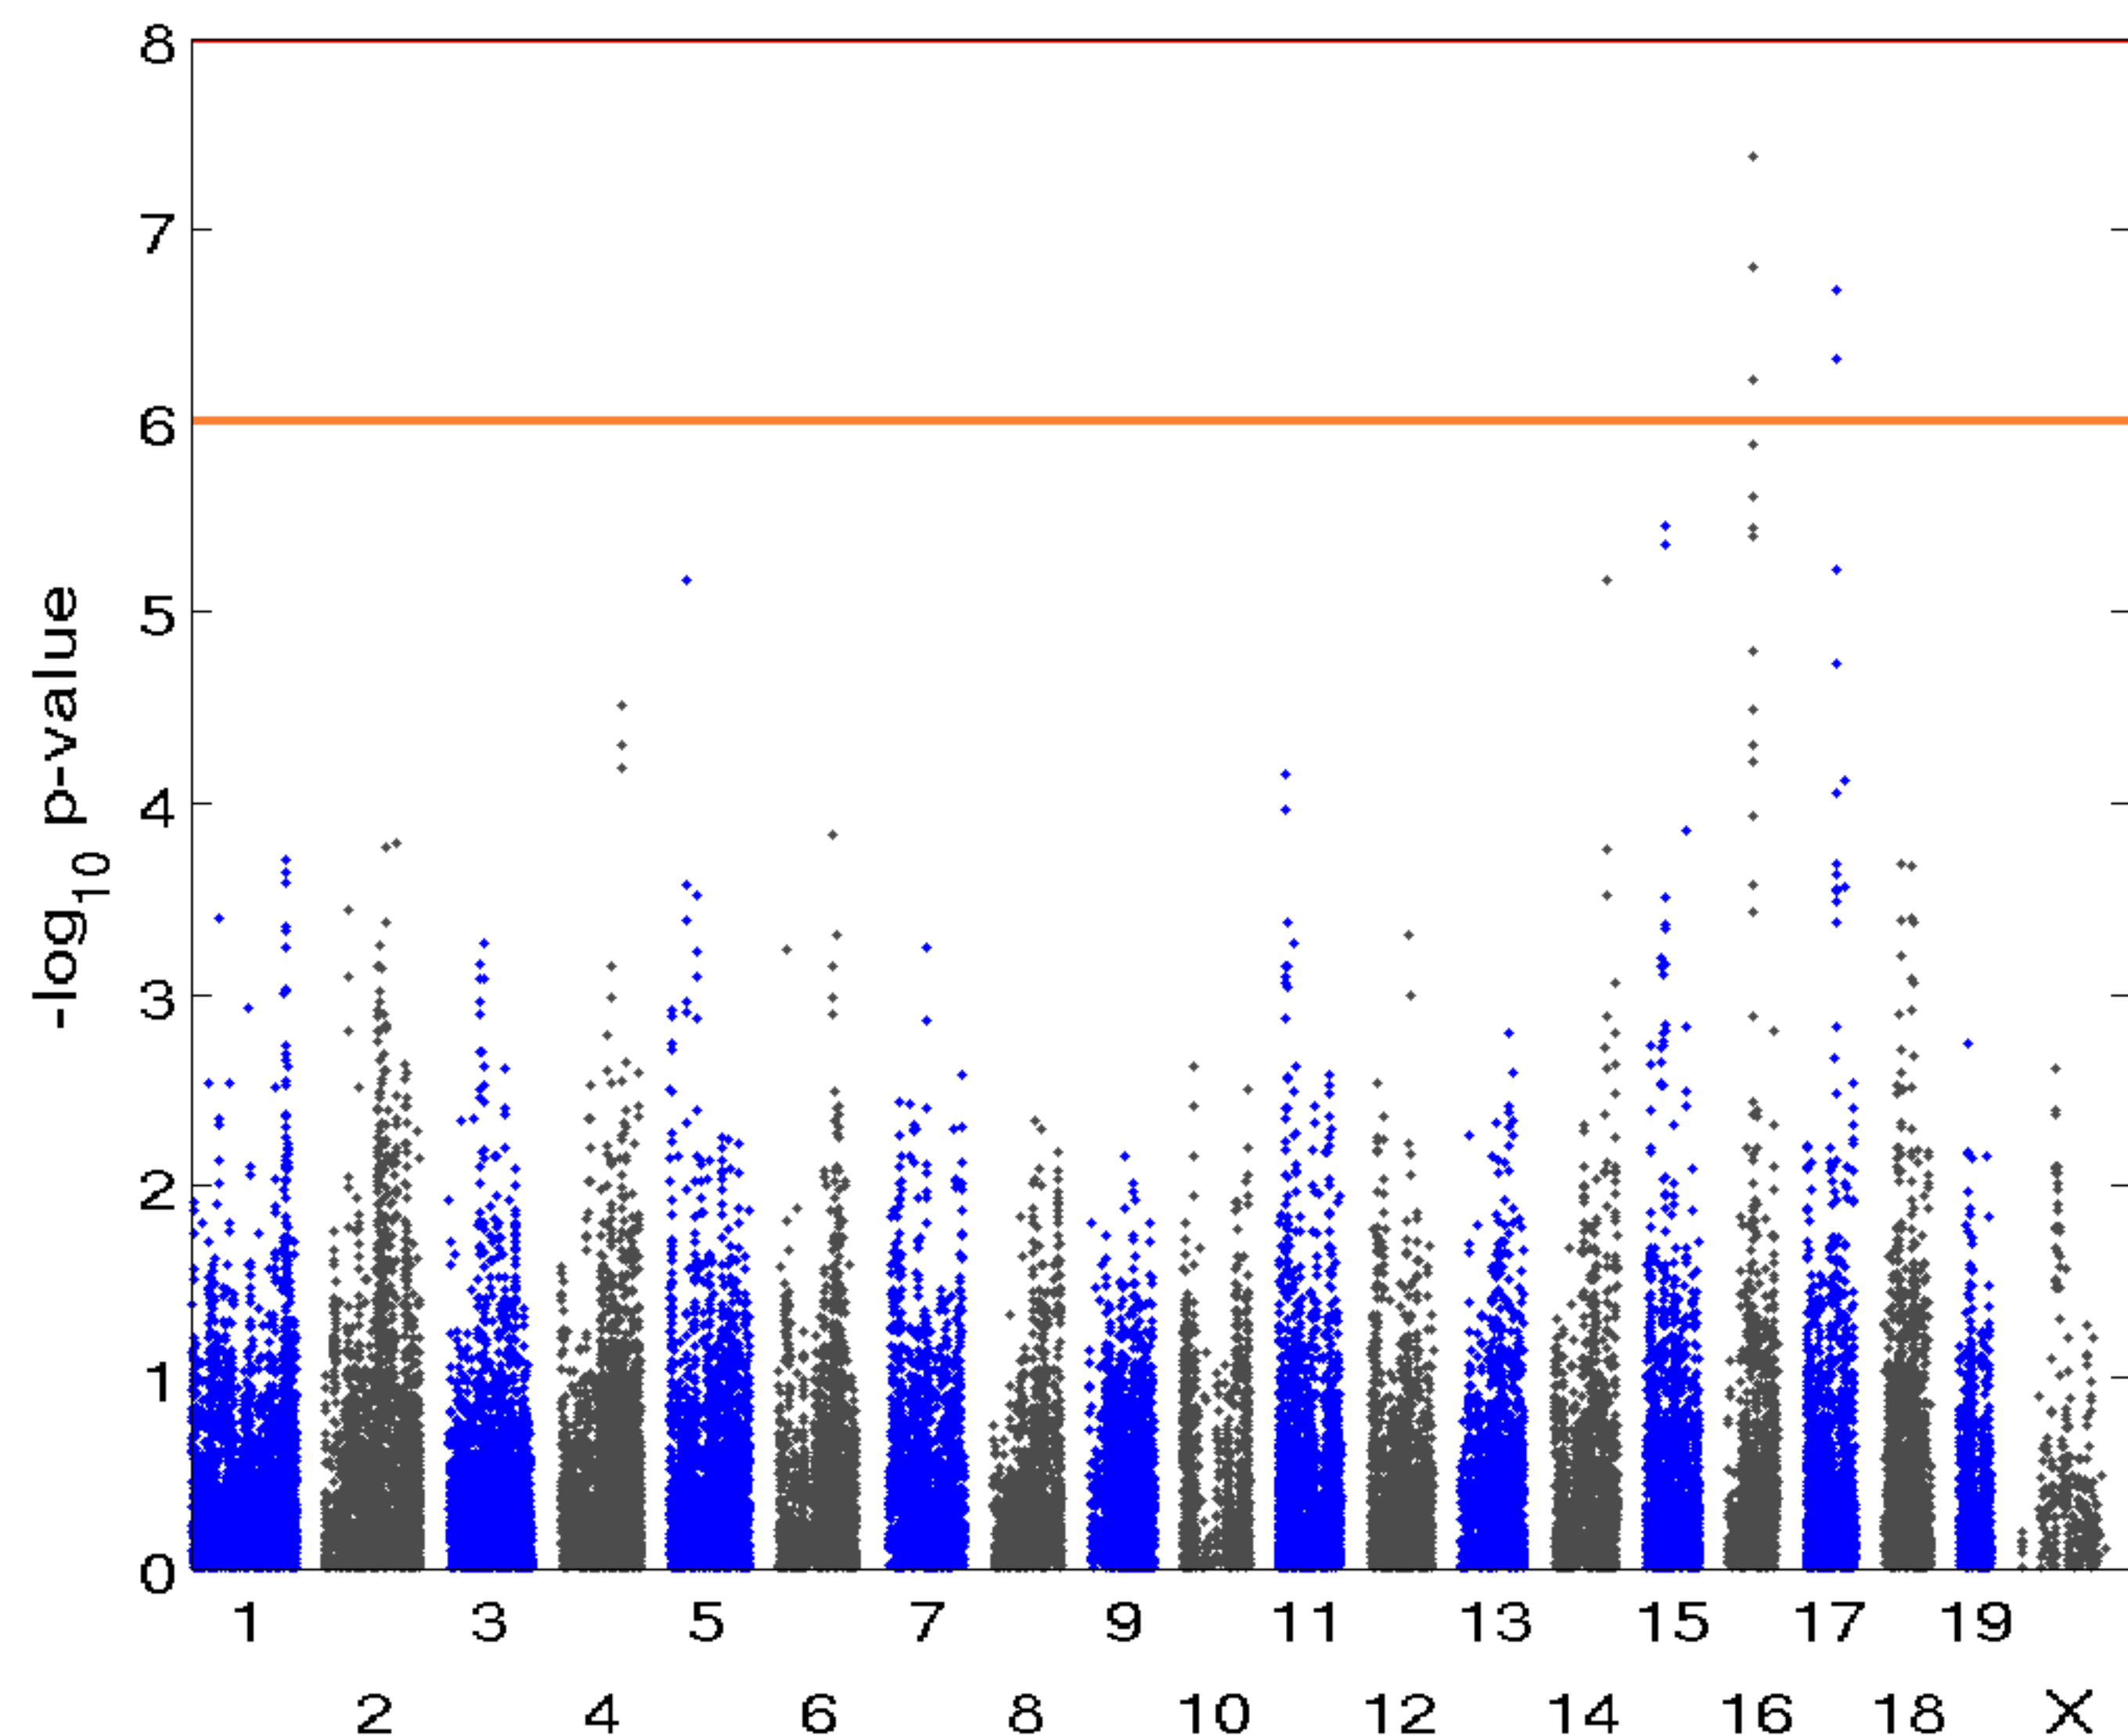

AW - ate vs ctr

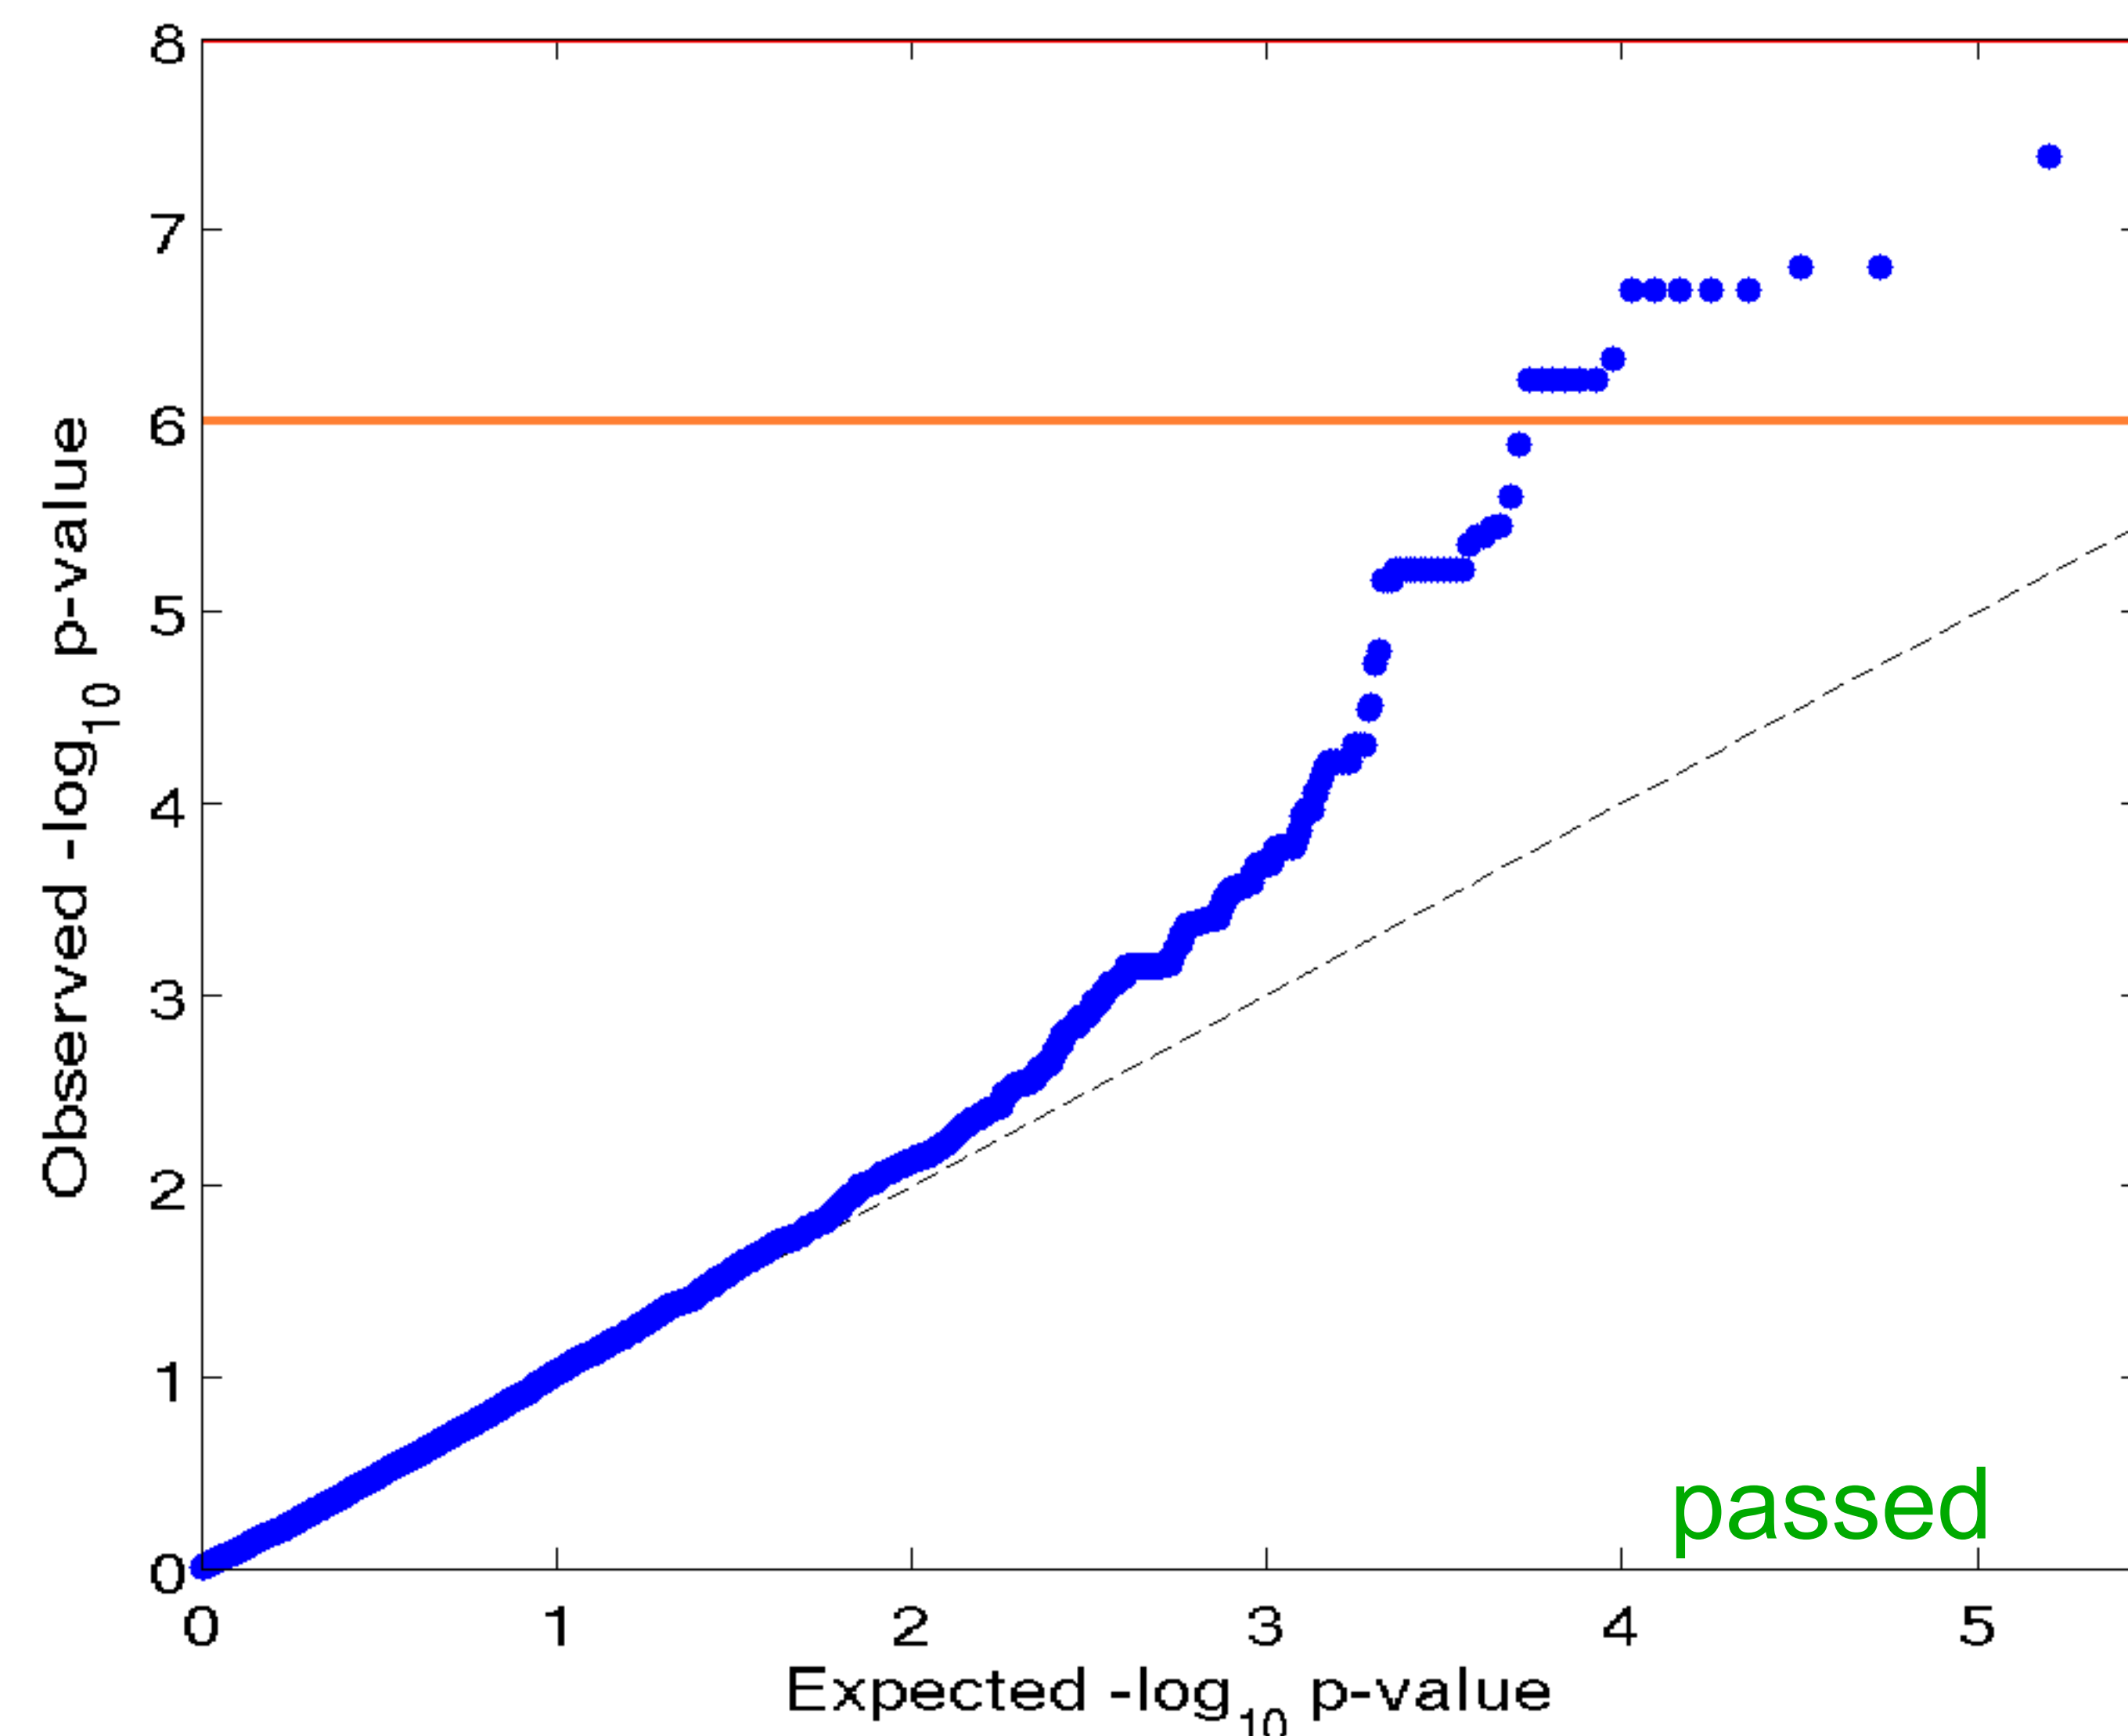

BWE - ate vs ctr

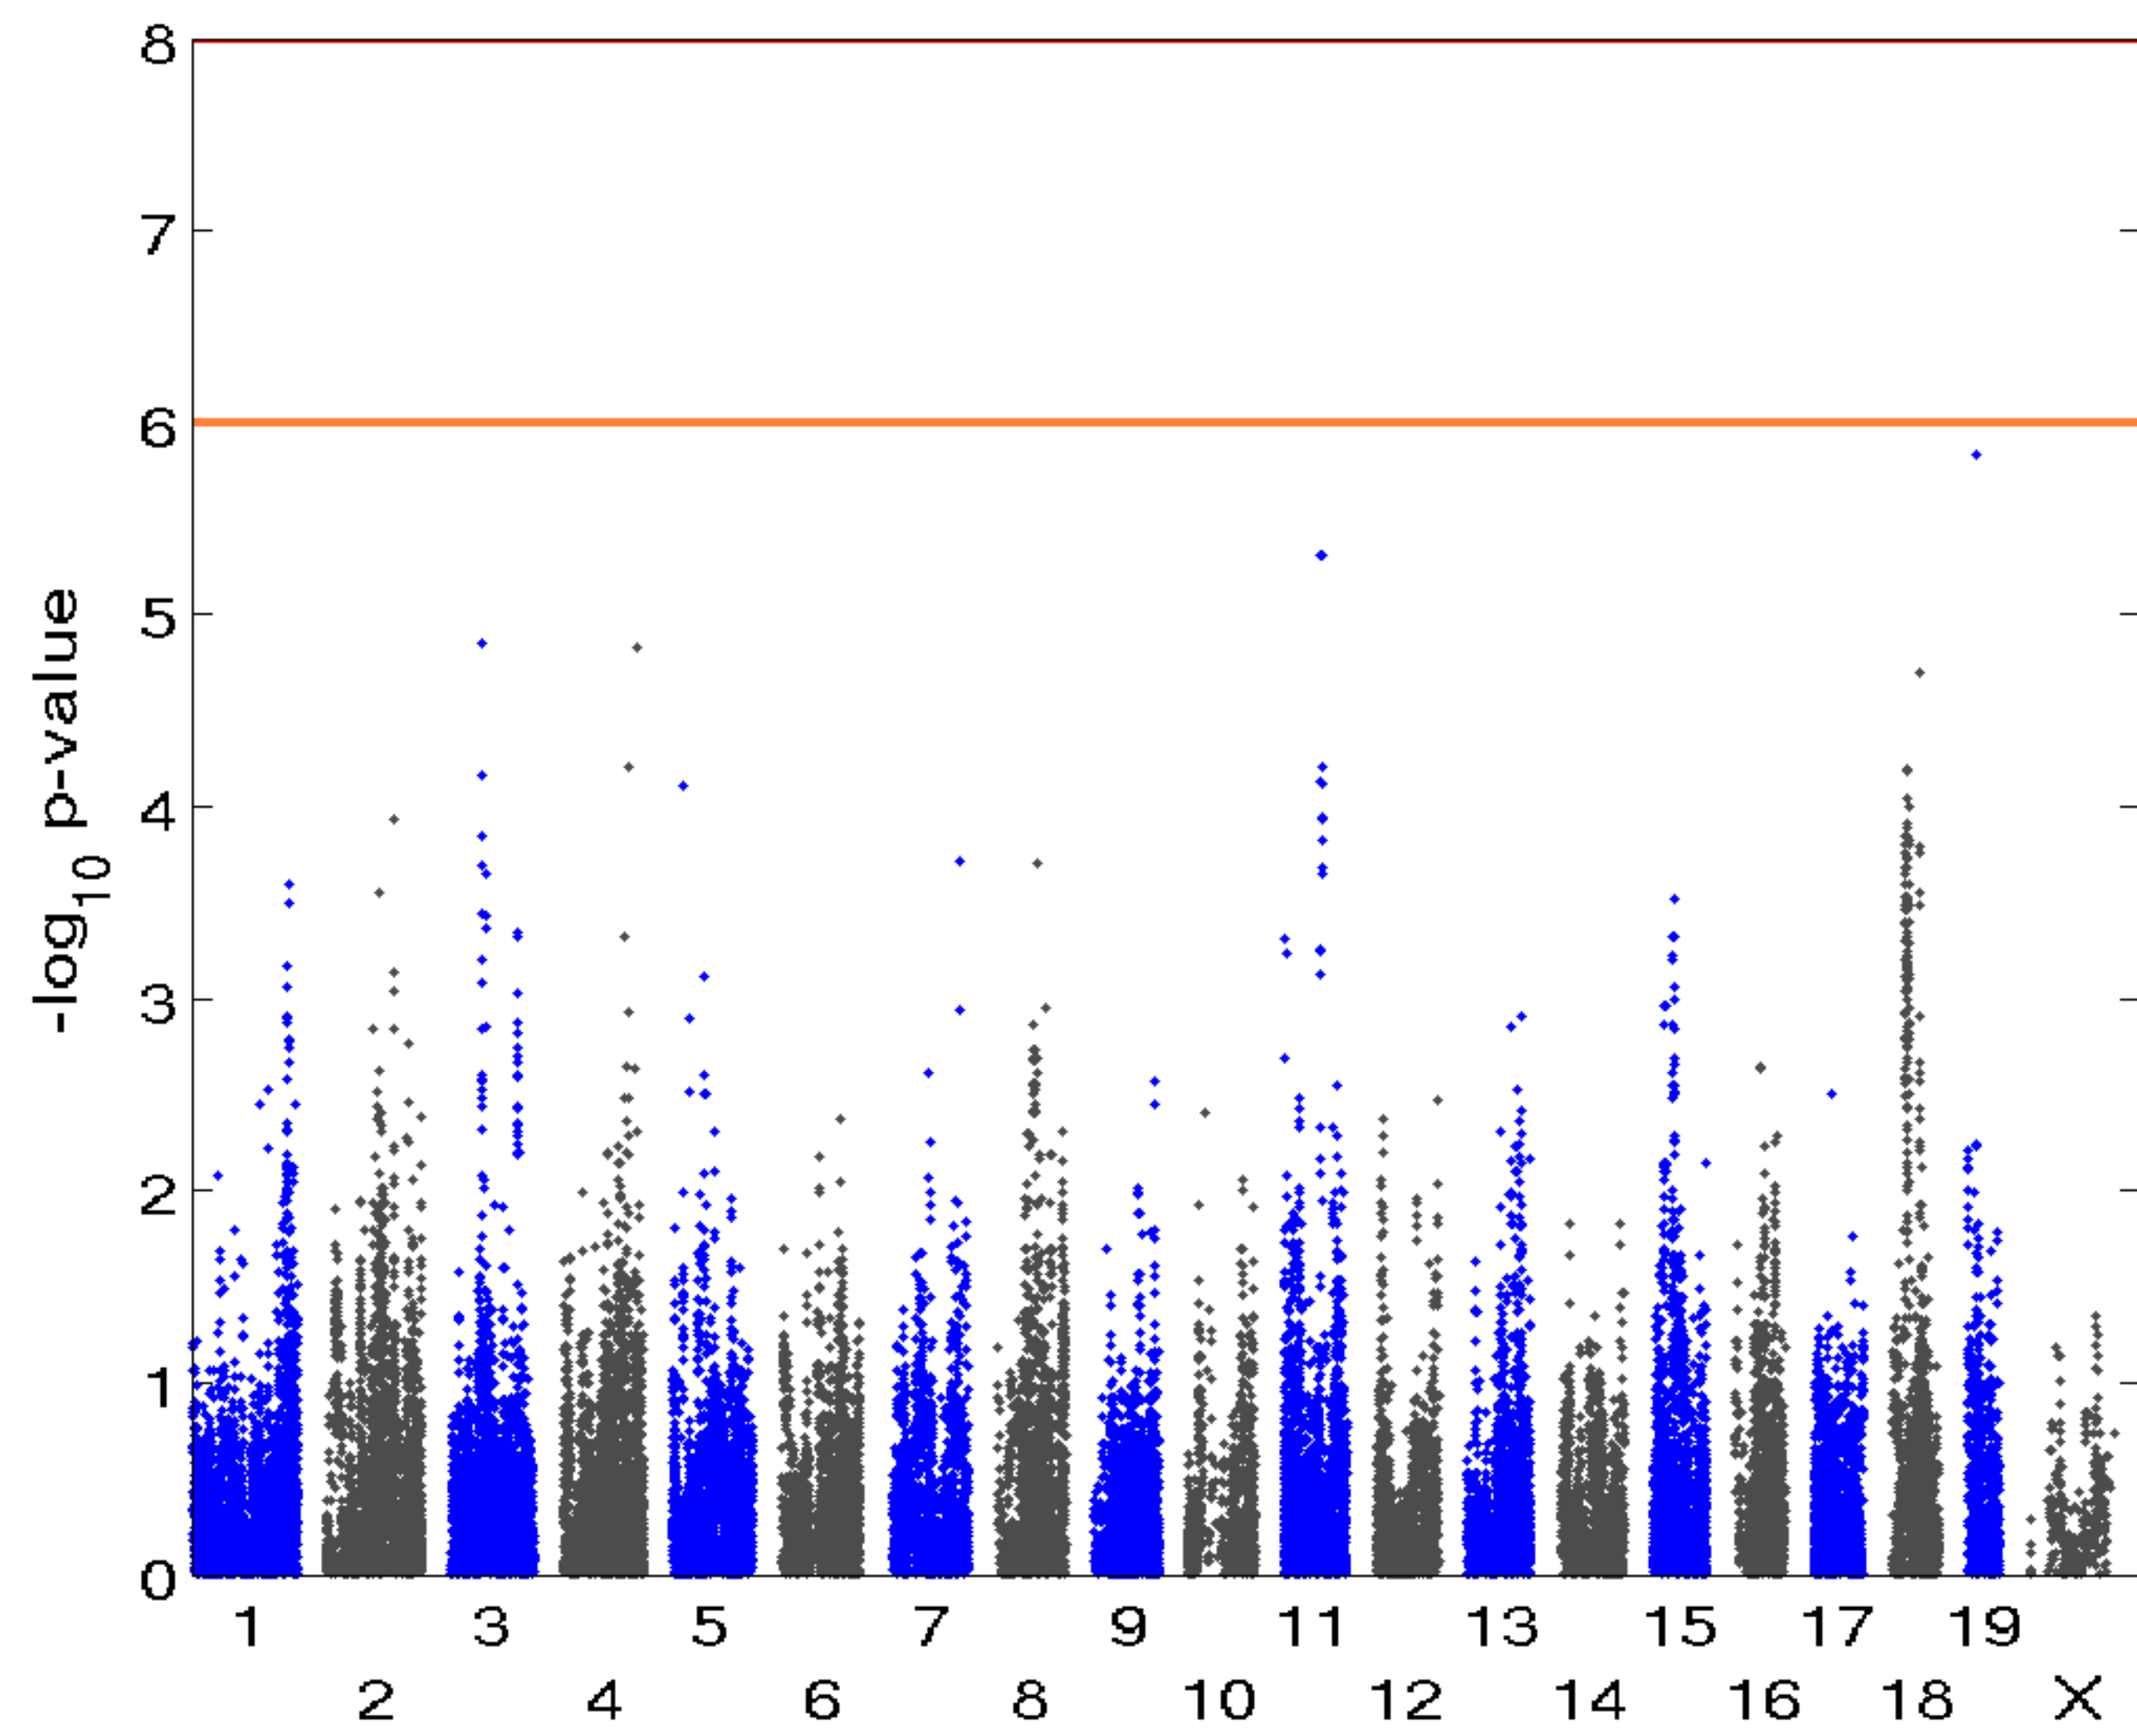

BWE - ate vs ctr

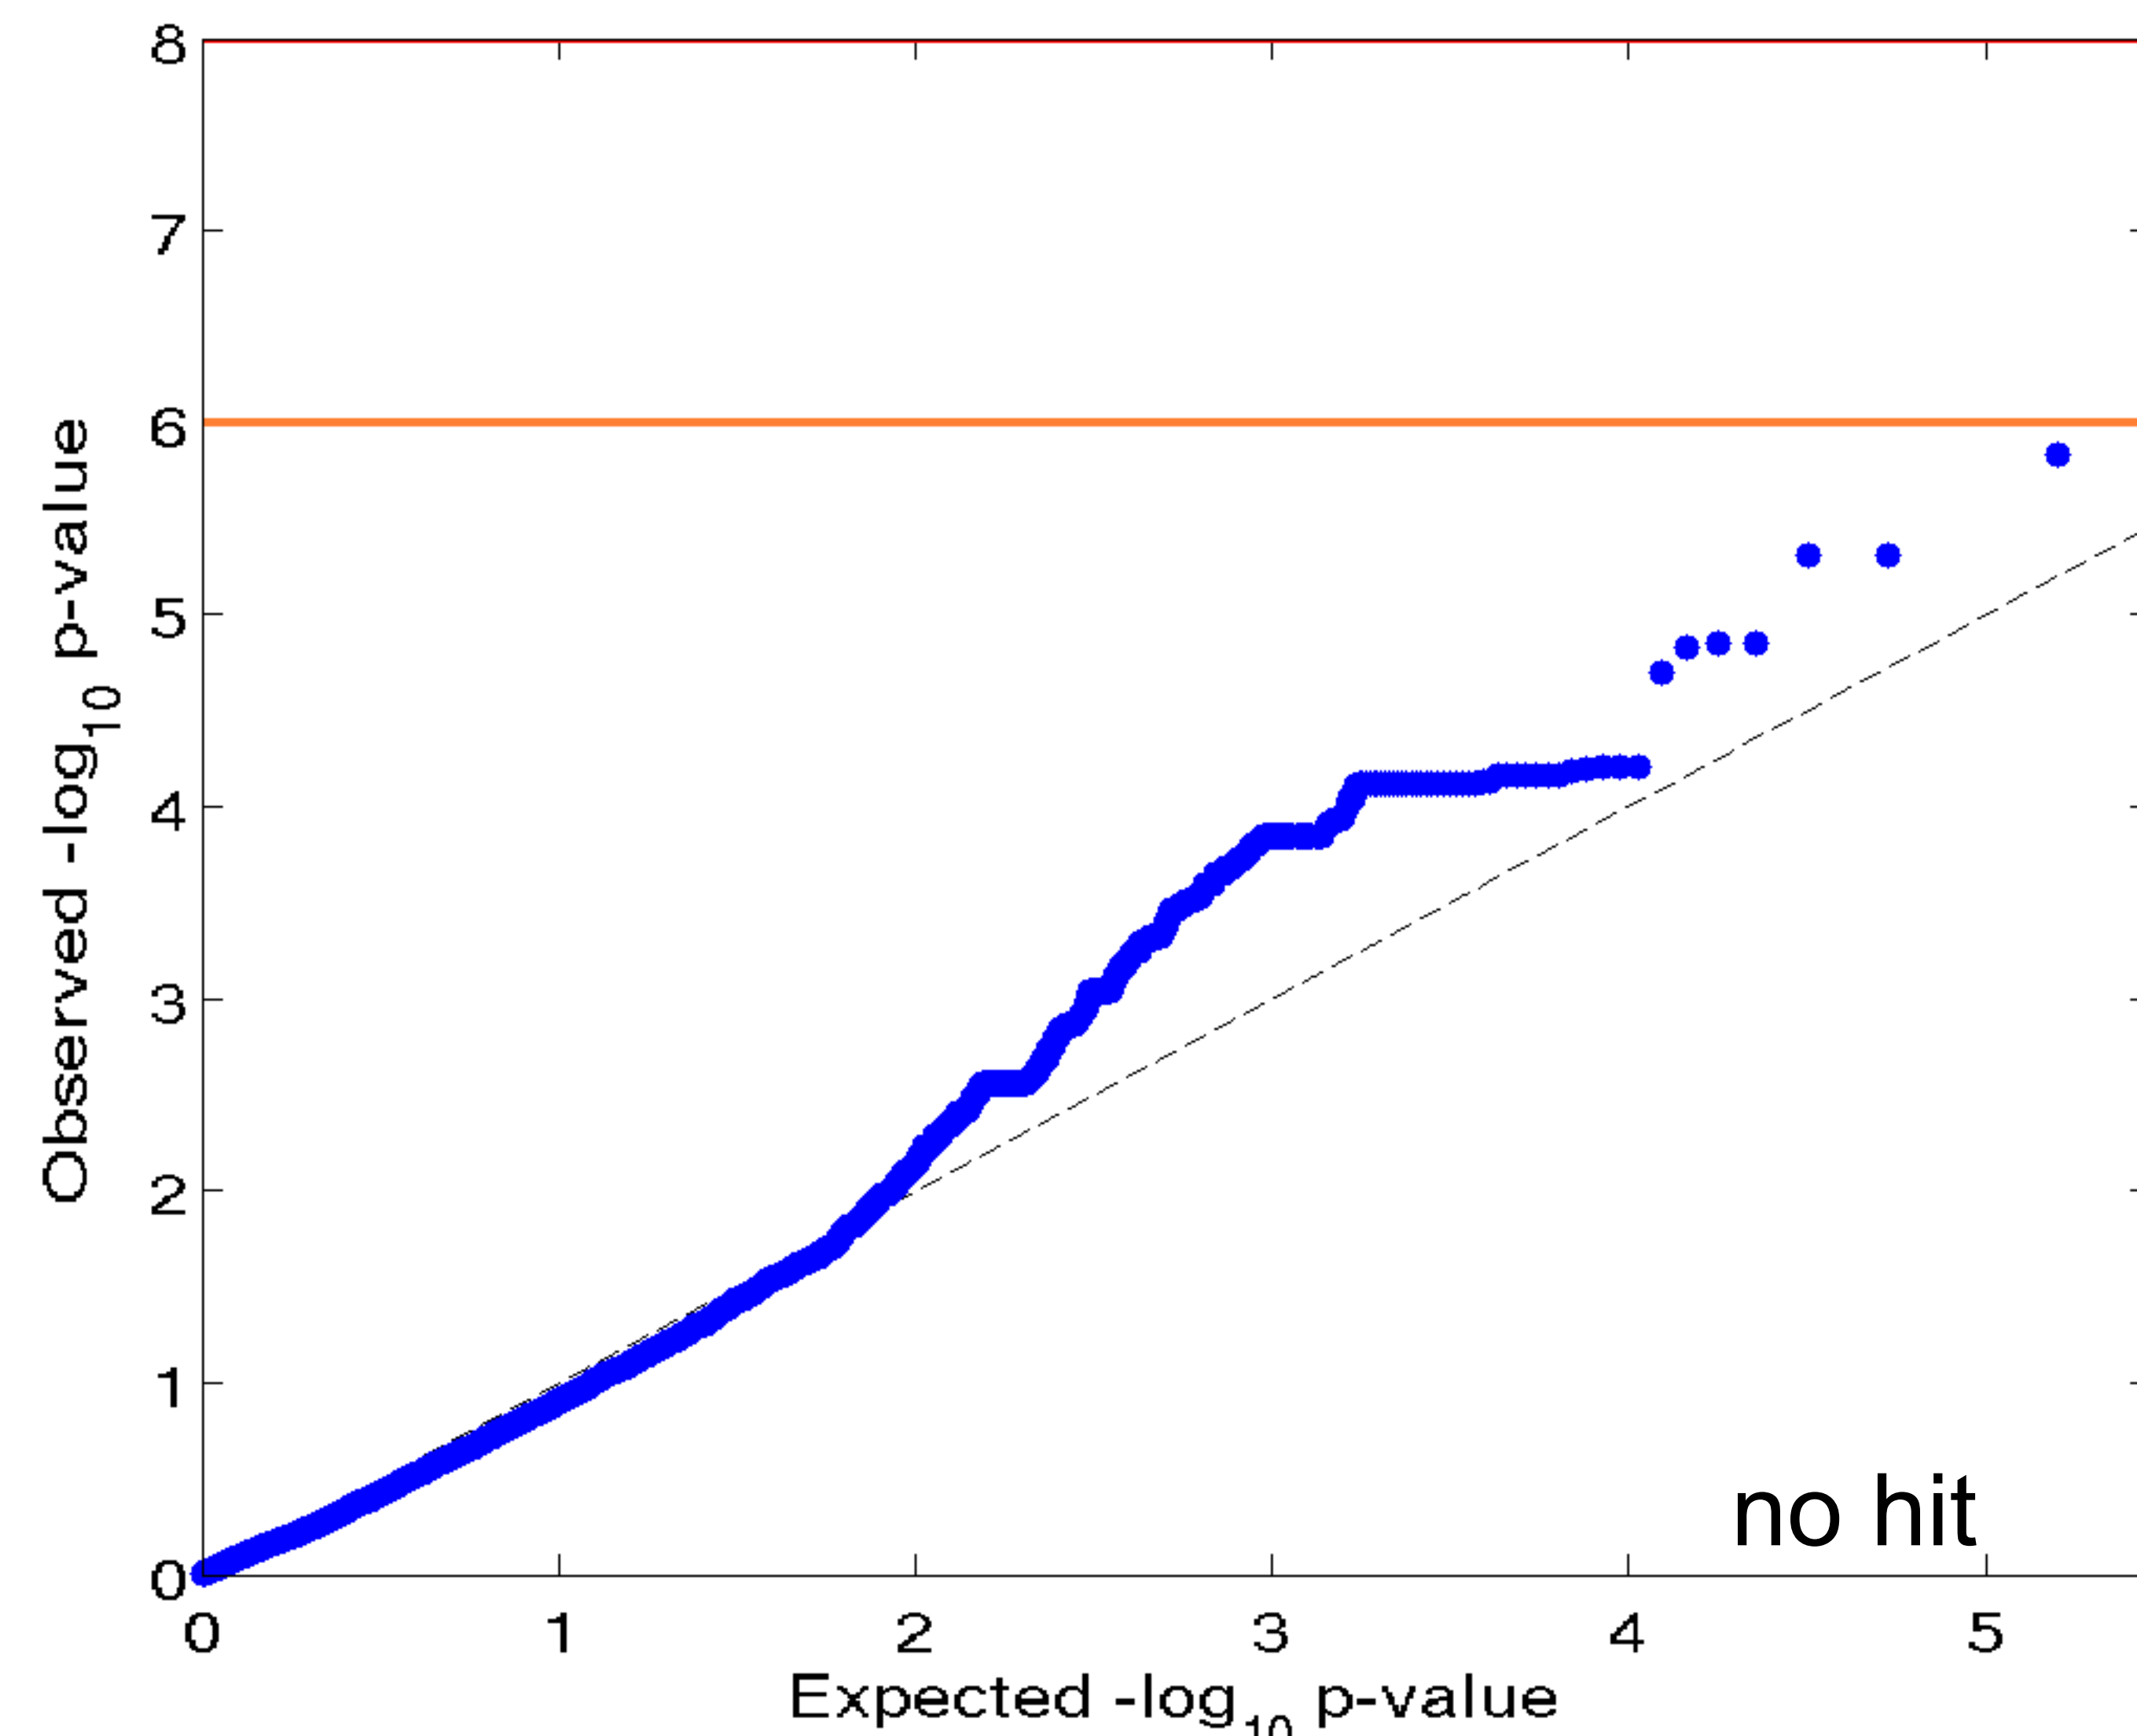



HR-ECG - ate vs ctr

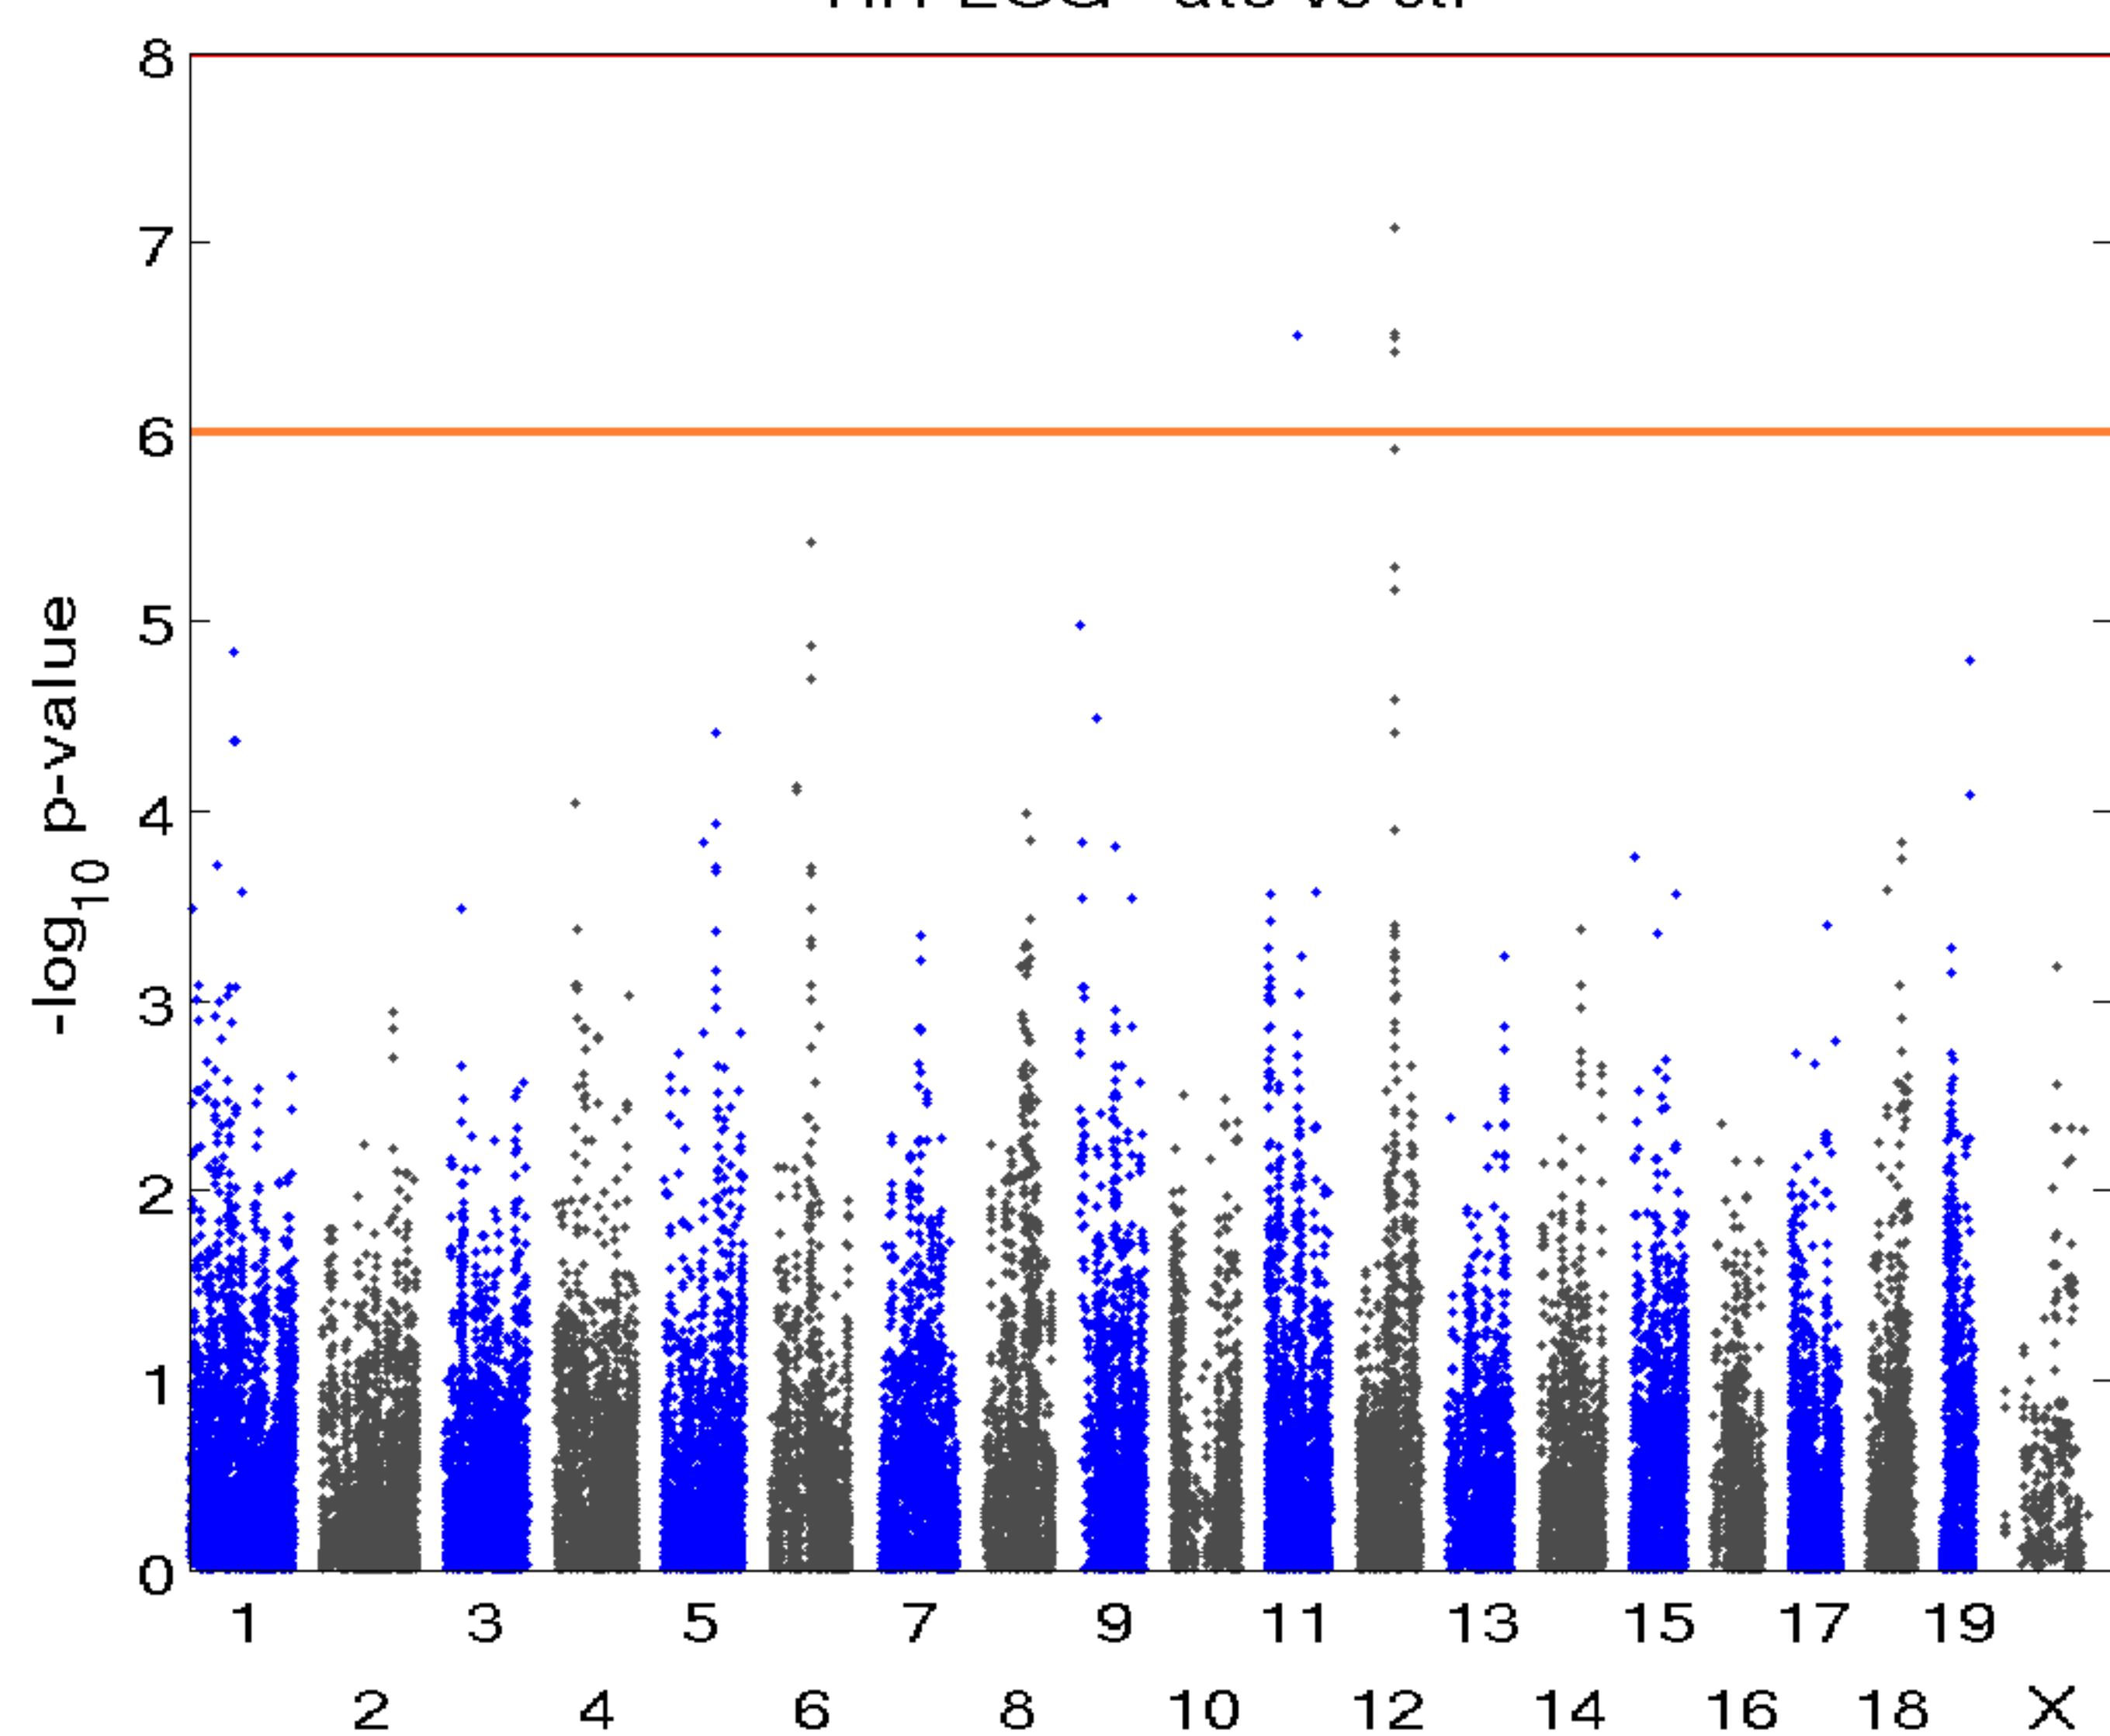

HR-ECG - ate vs ctr

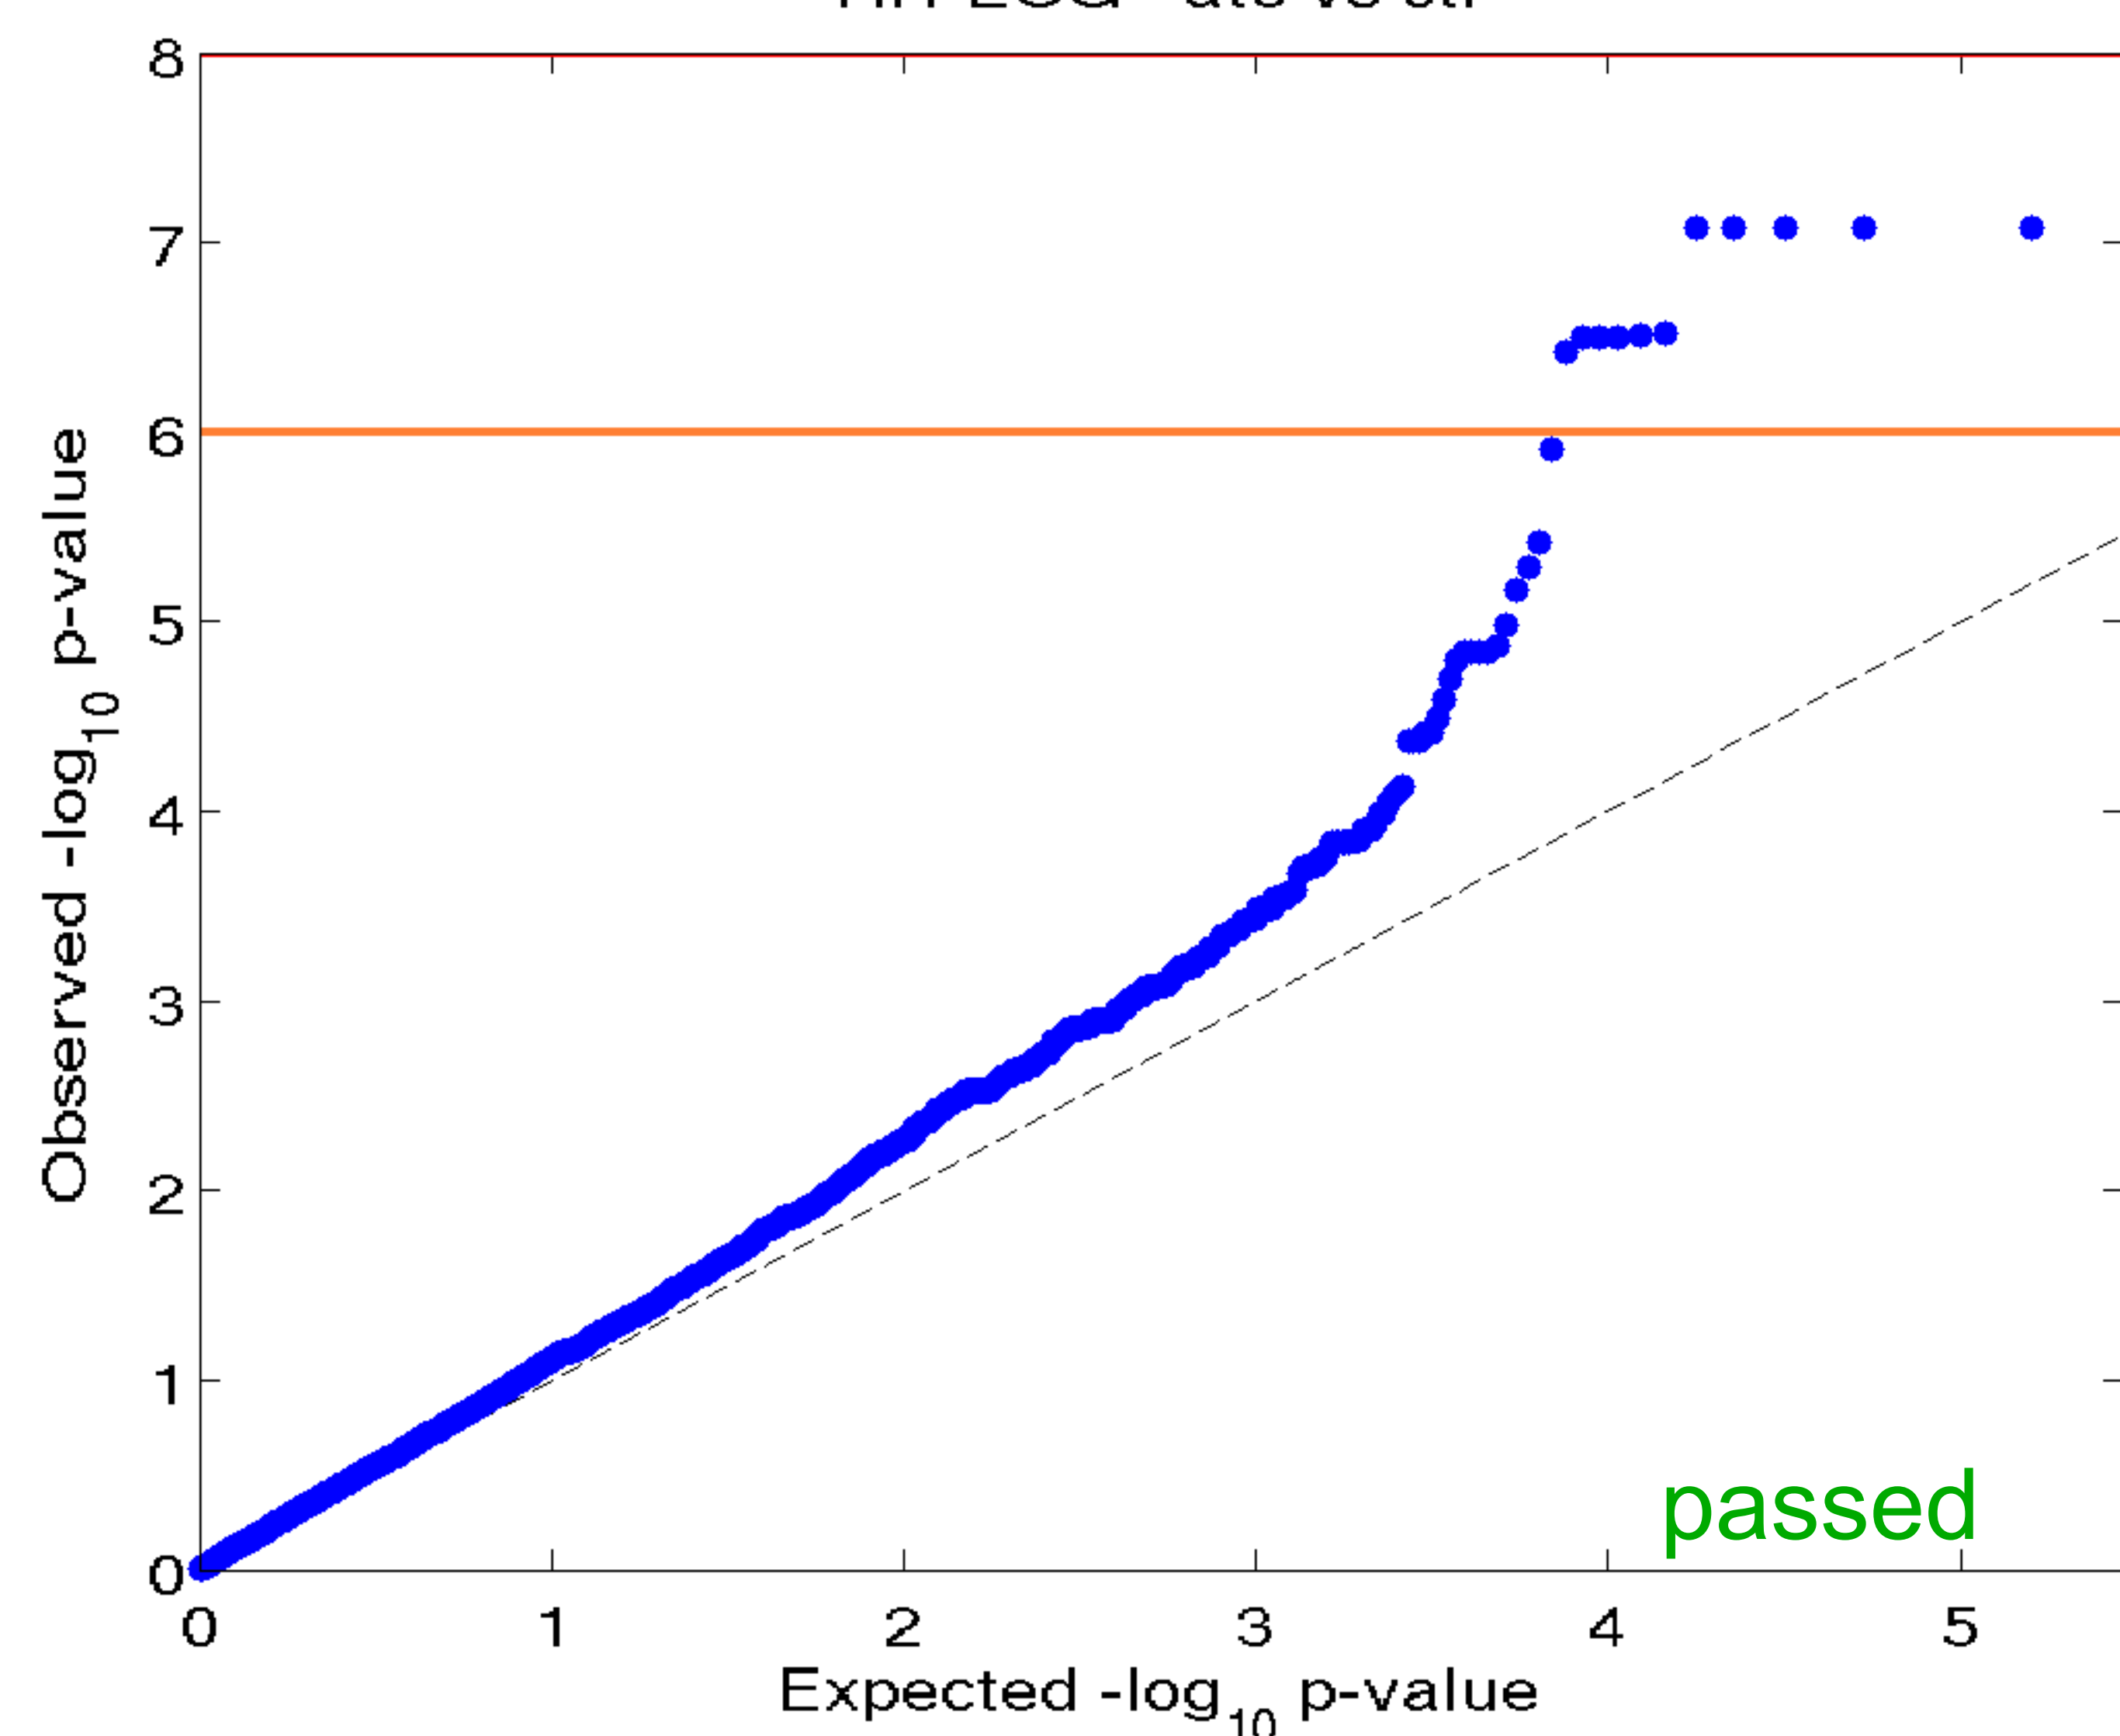

HR-TC - ate vs ctr

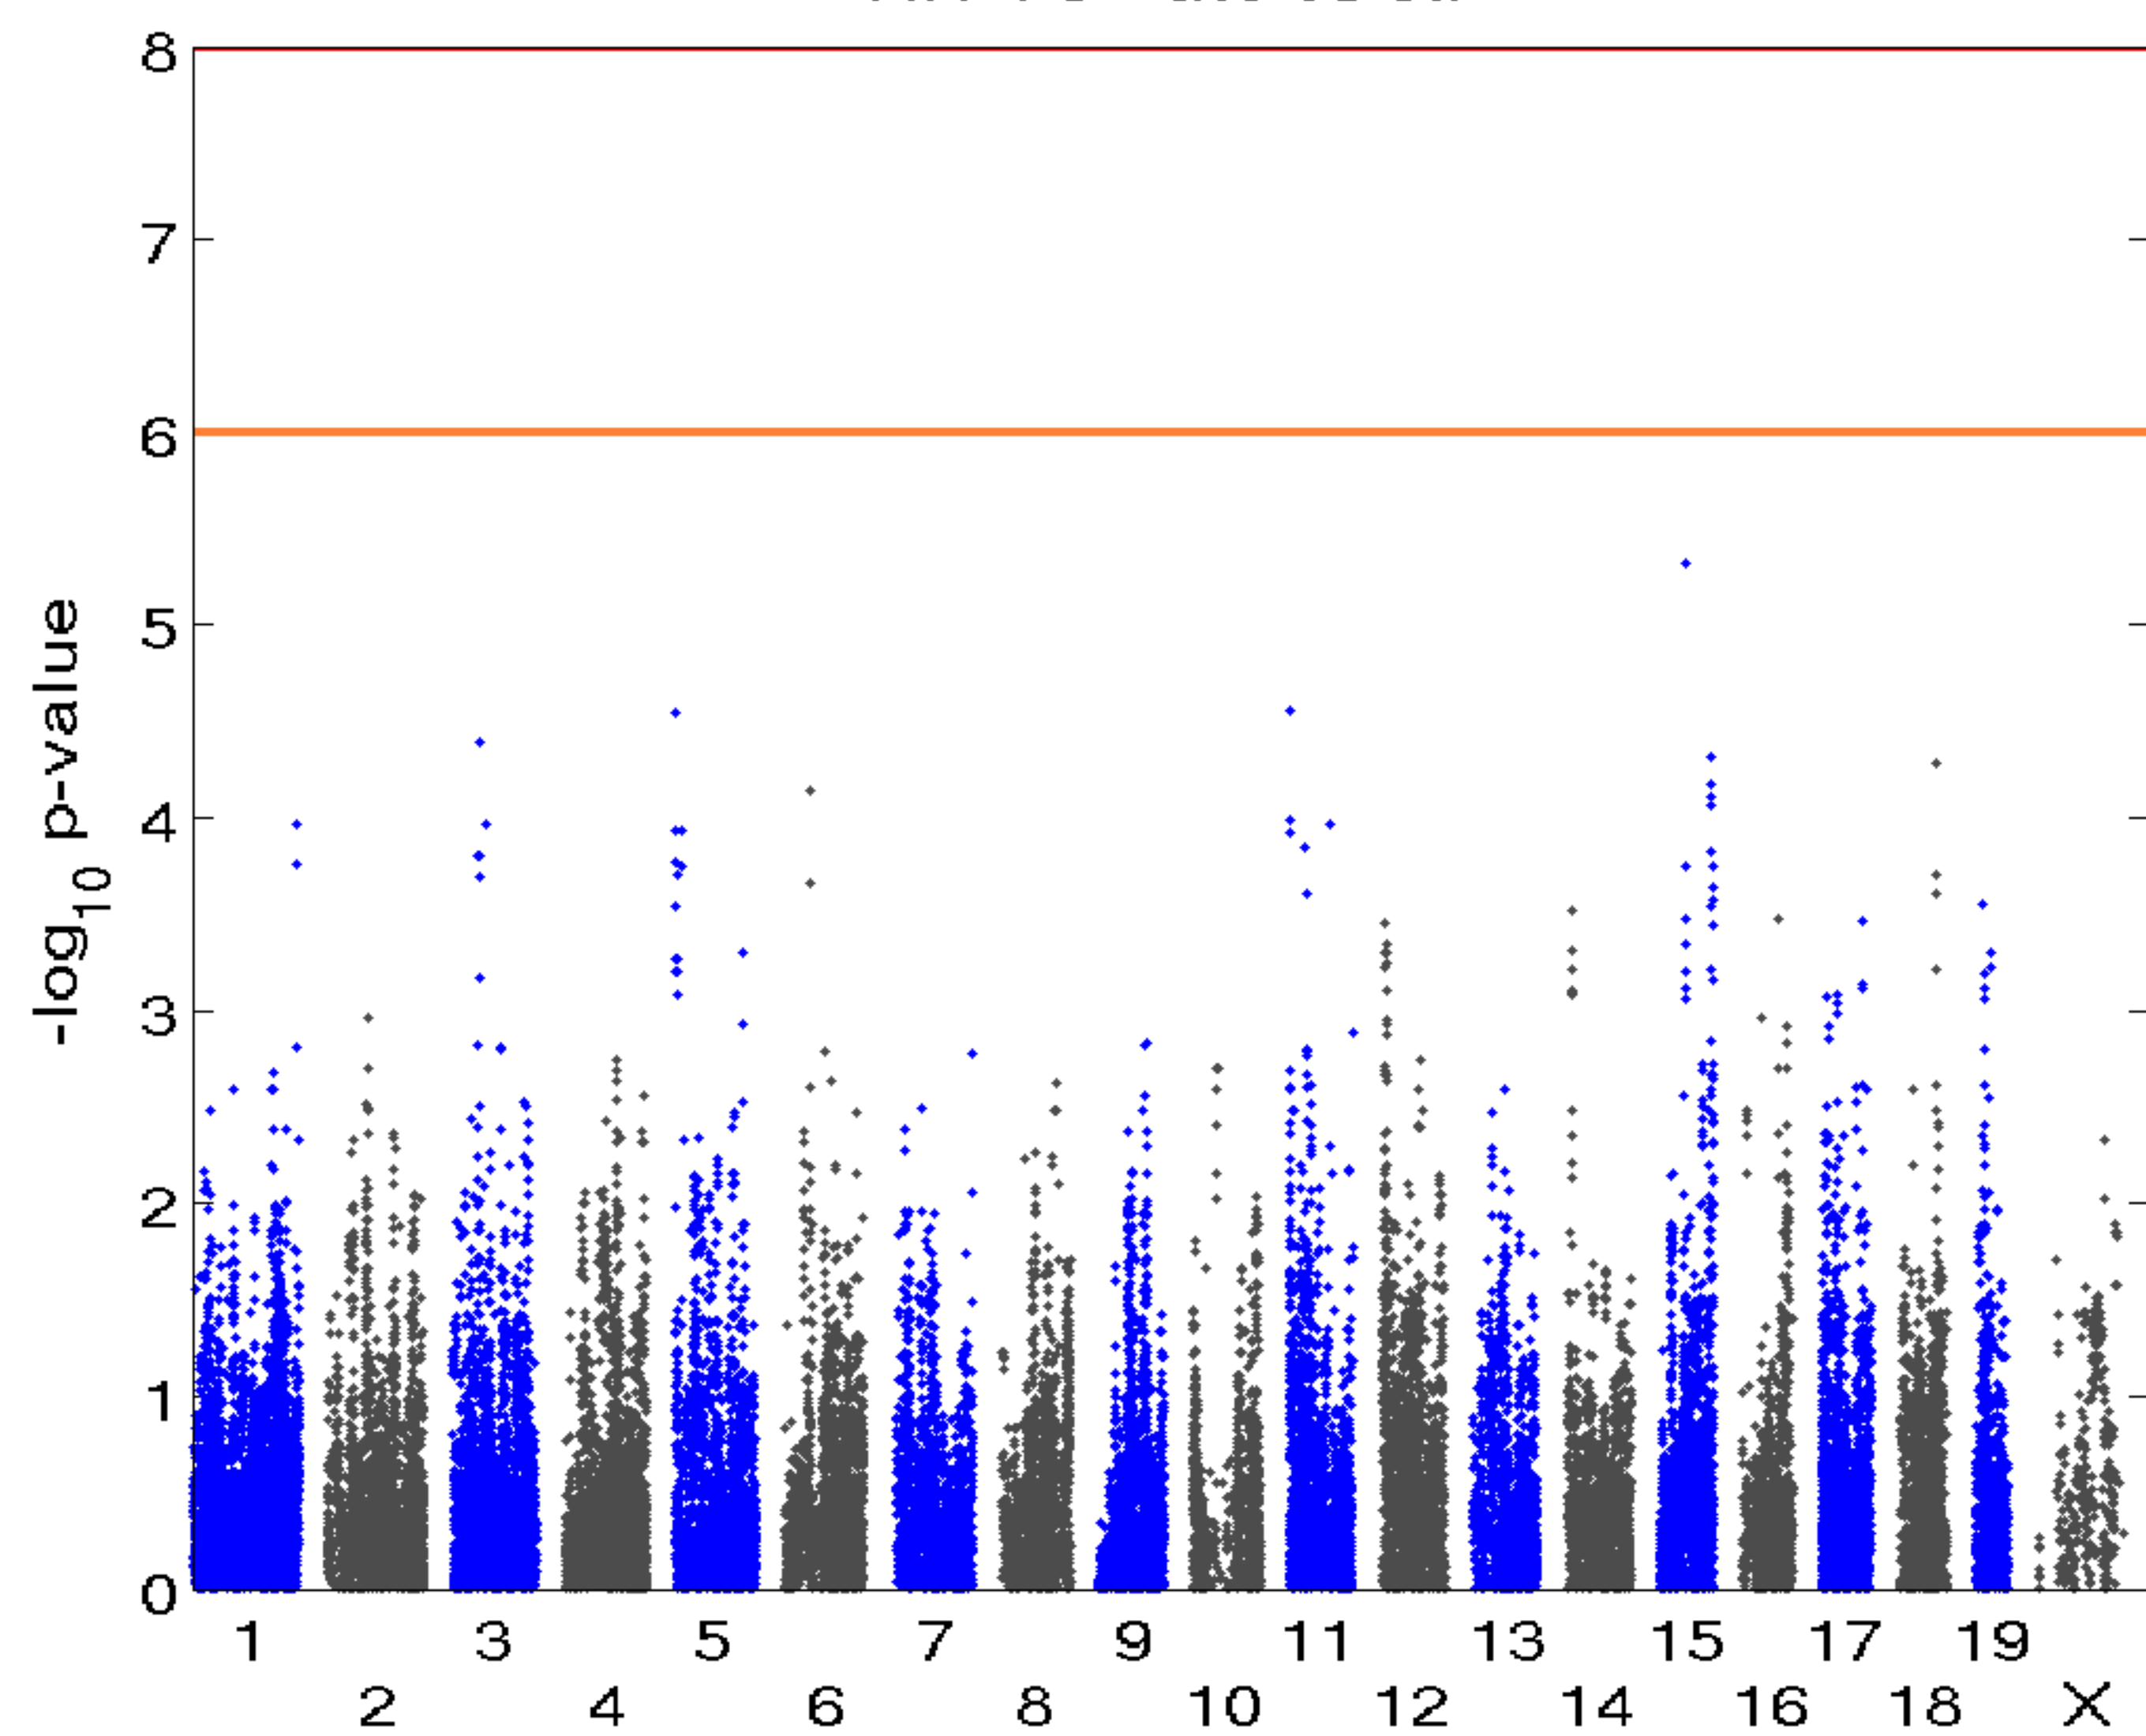

HR-TC - ate vs ctr

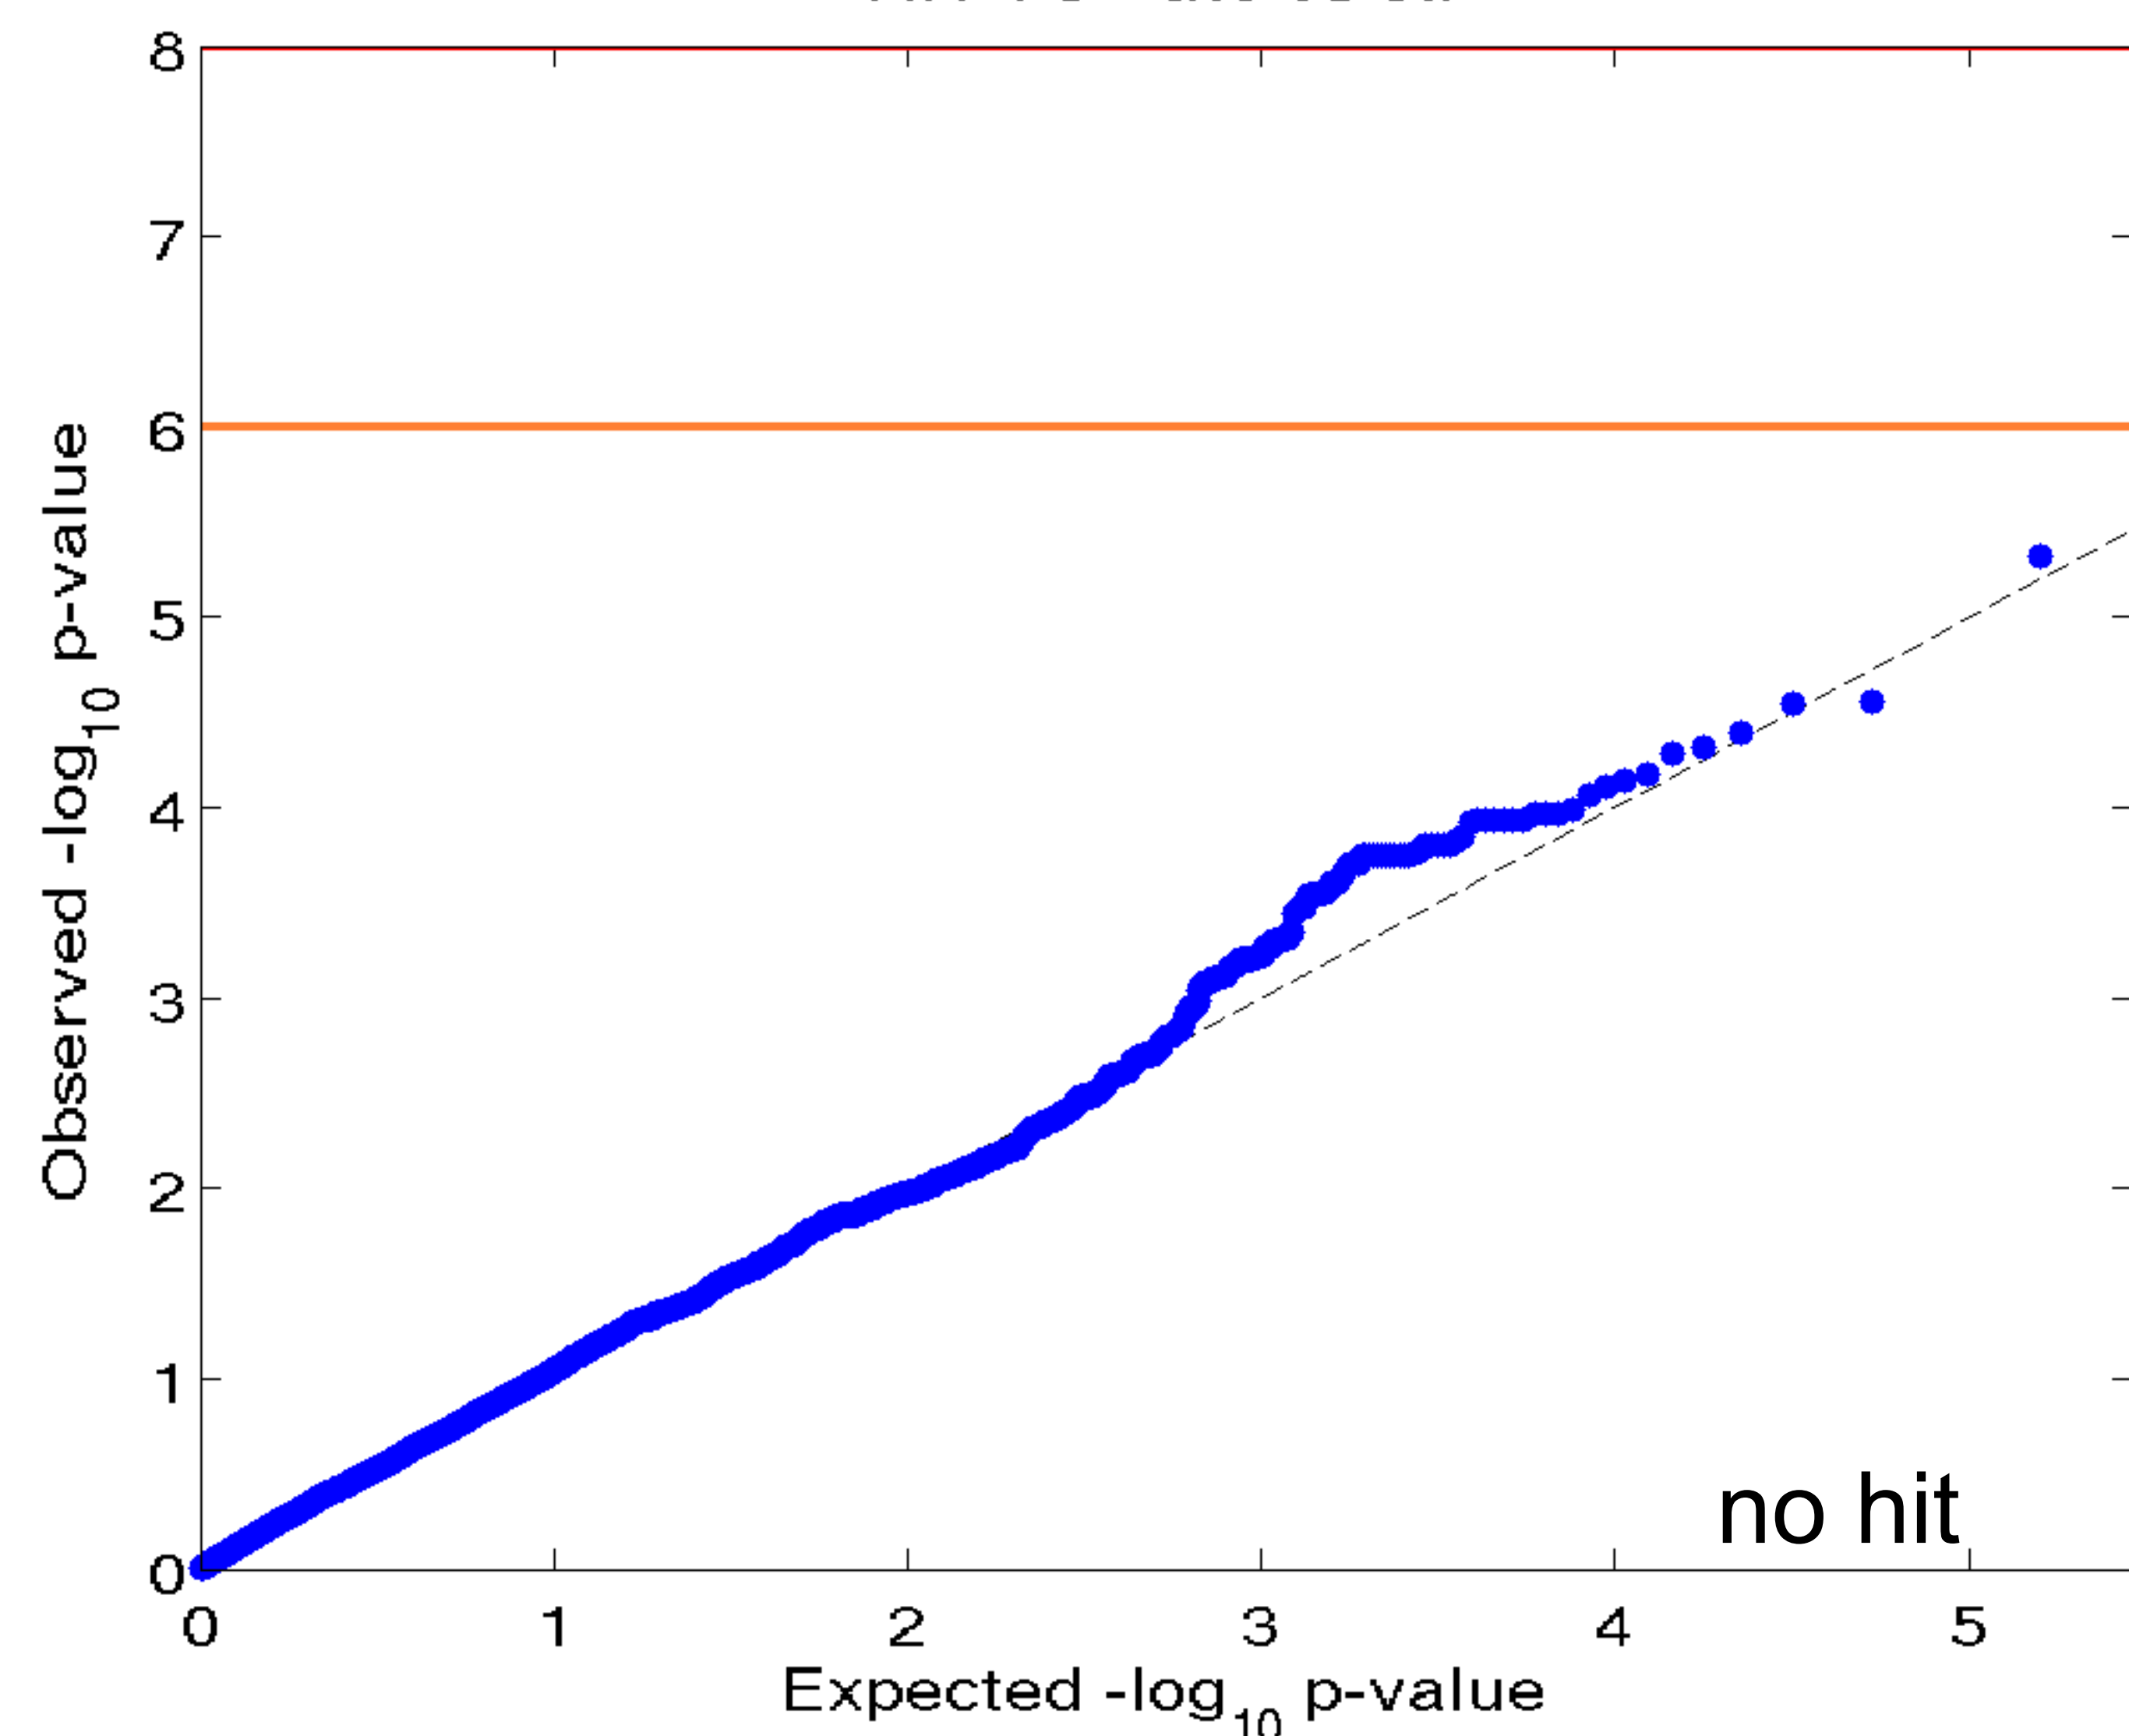

HW - ate vs ctr

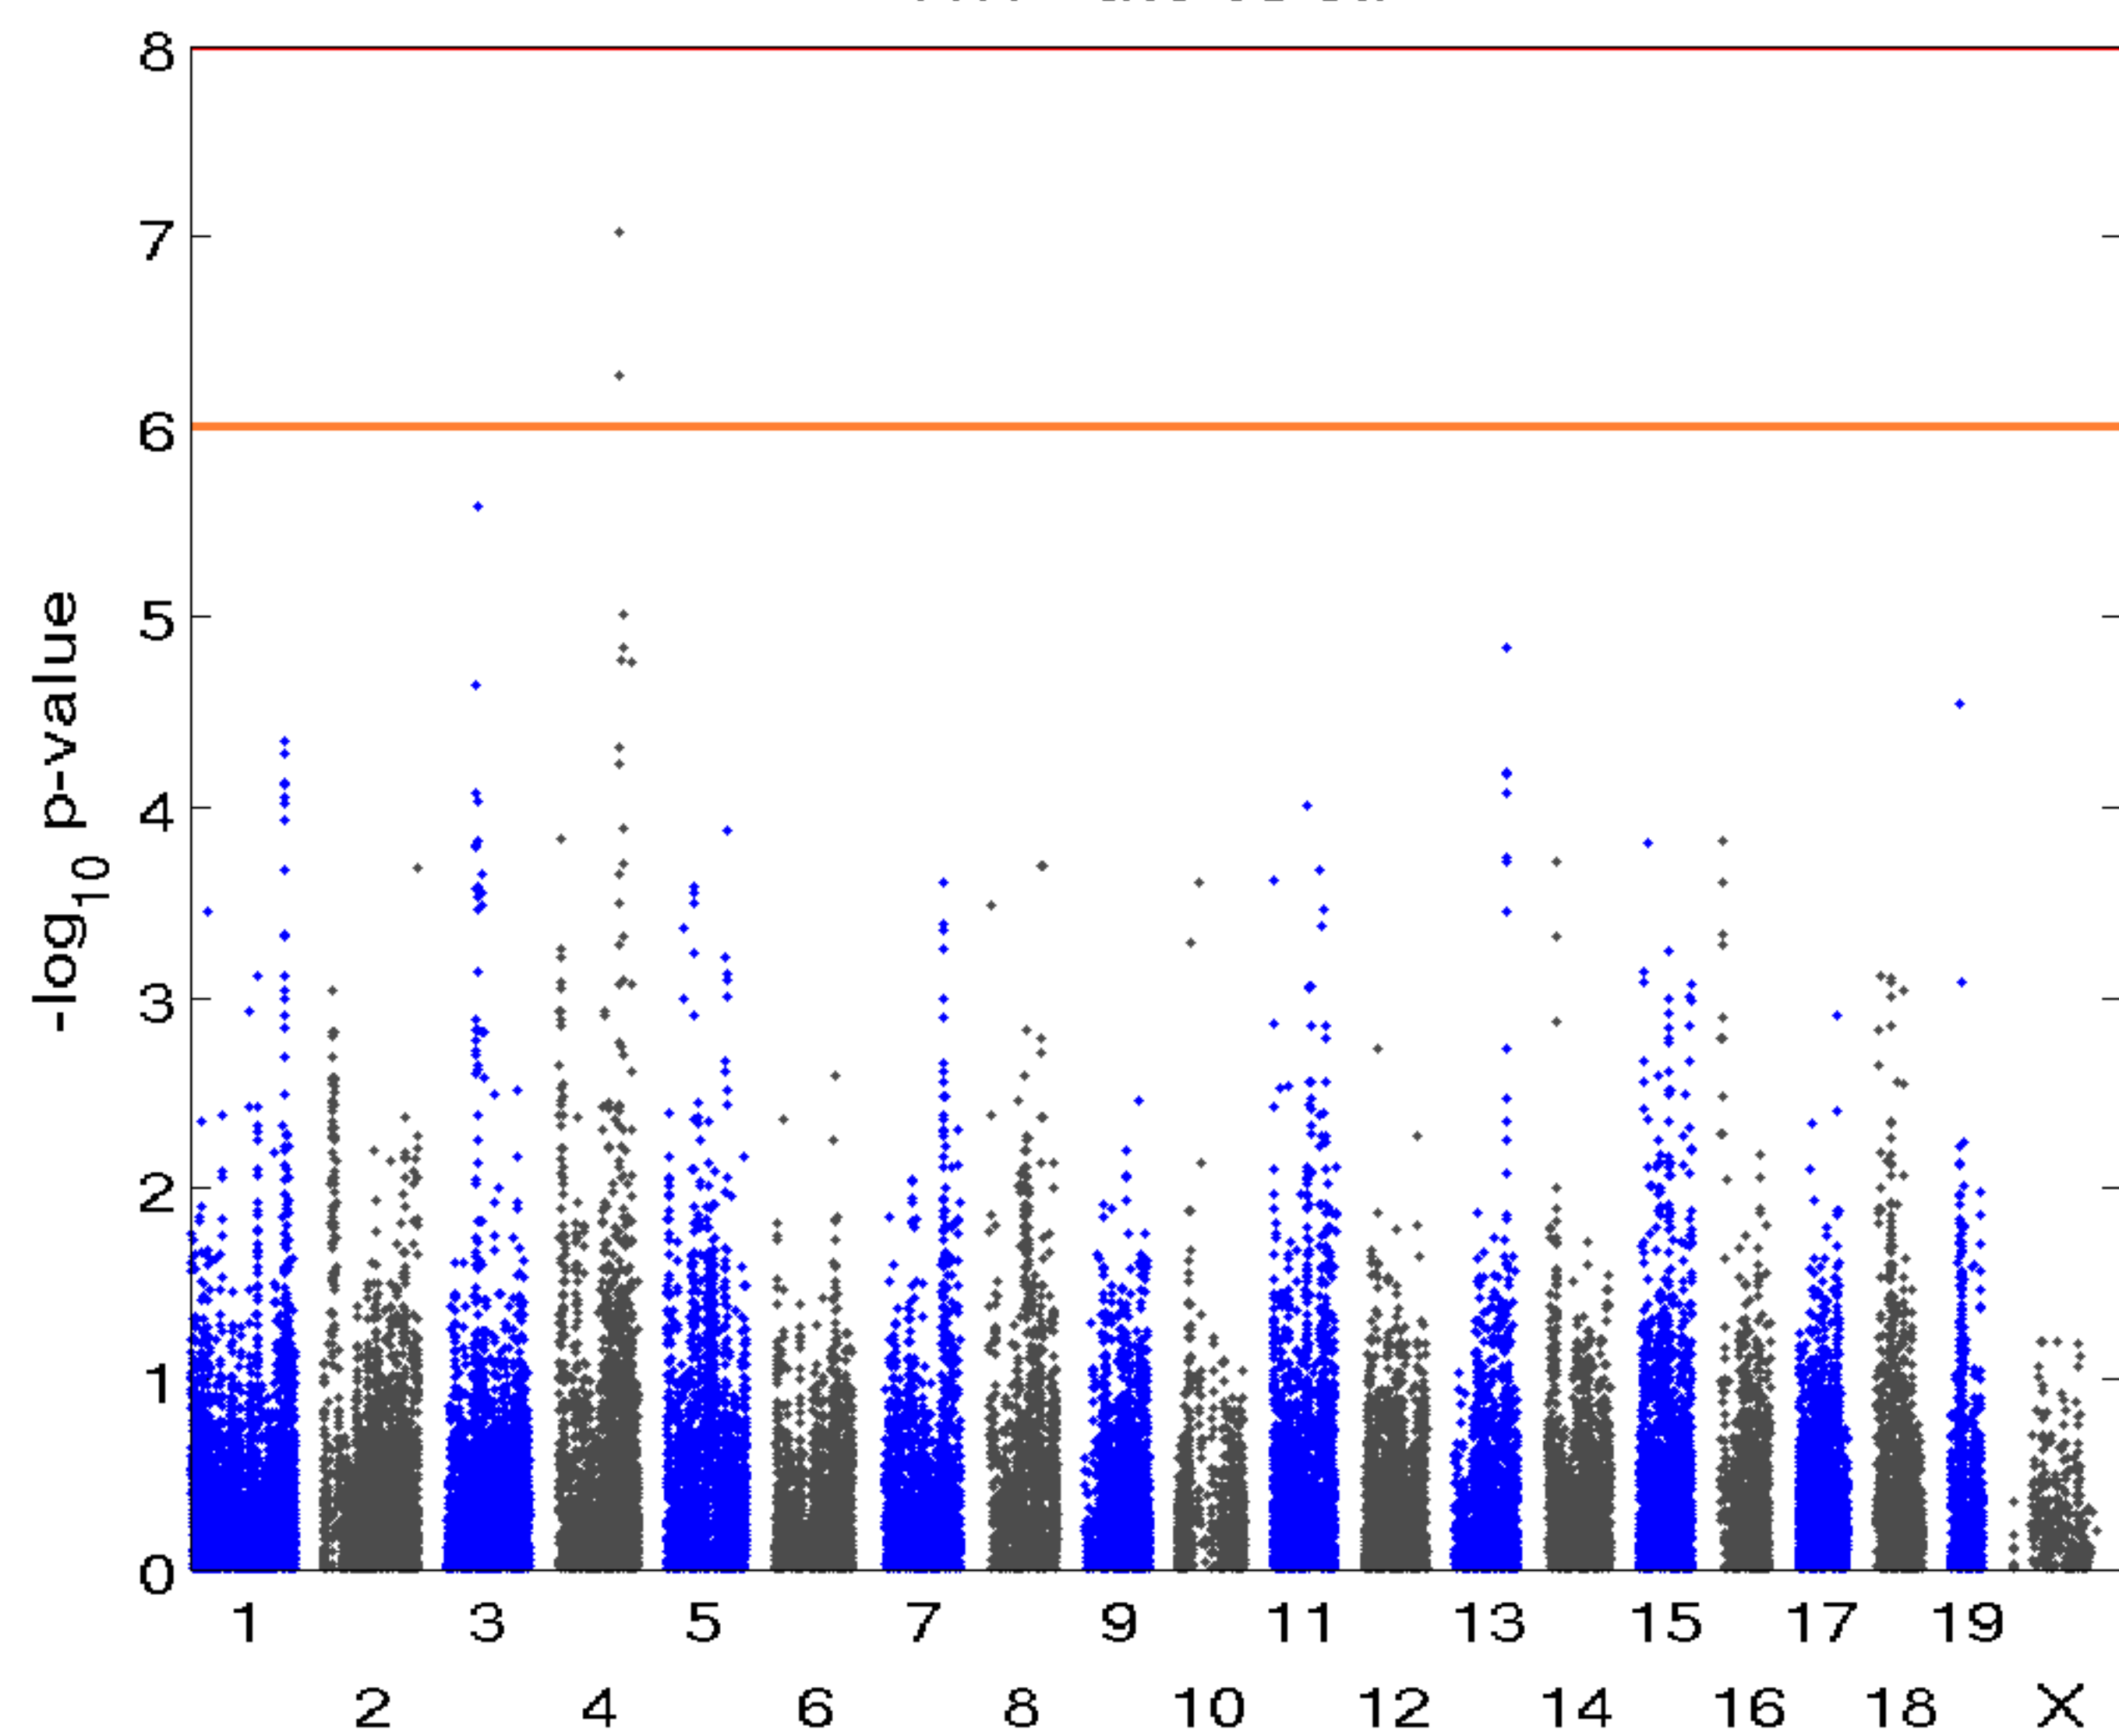

HW - ate vs ctr

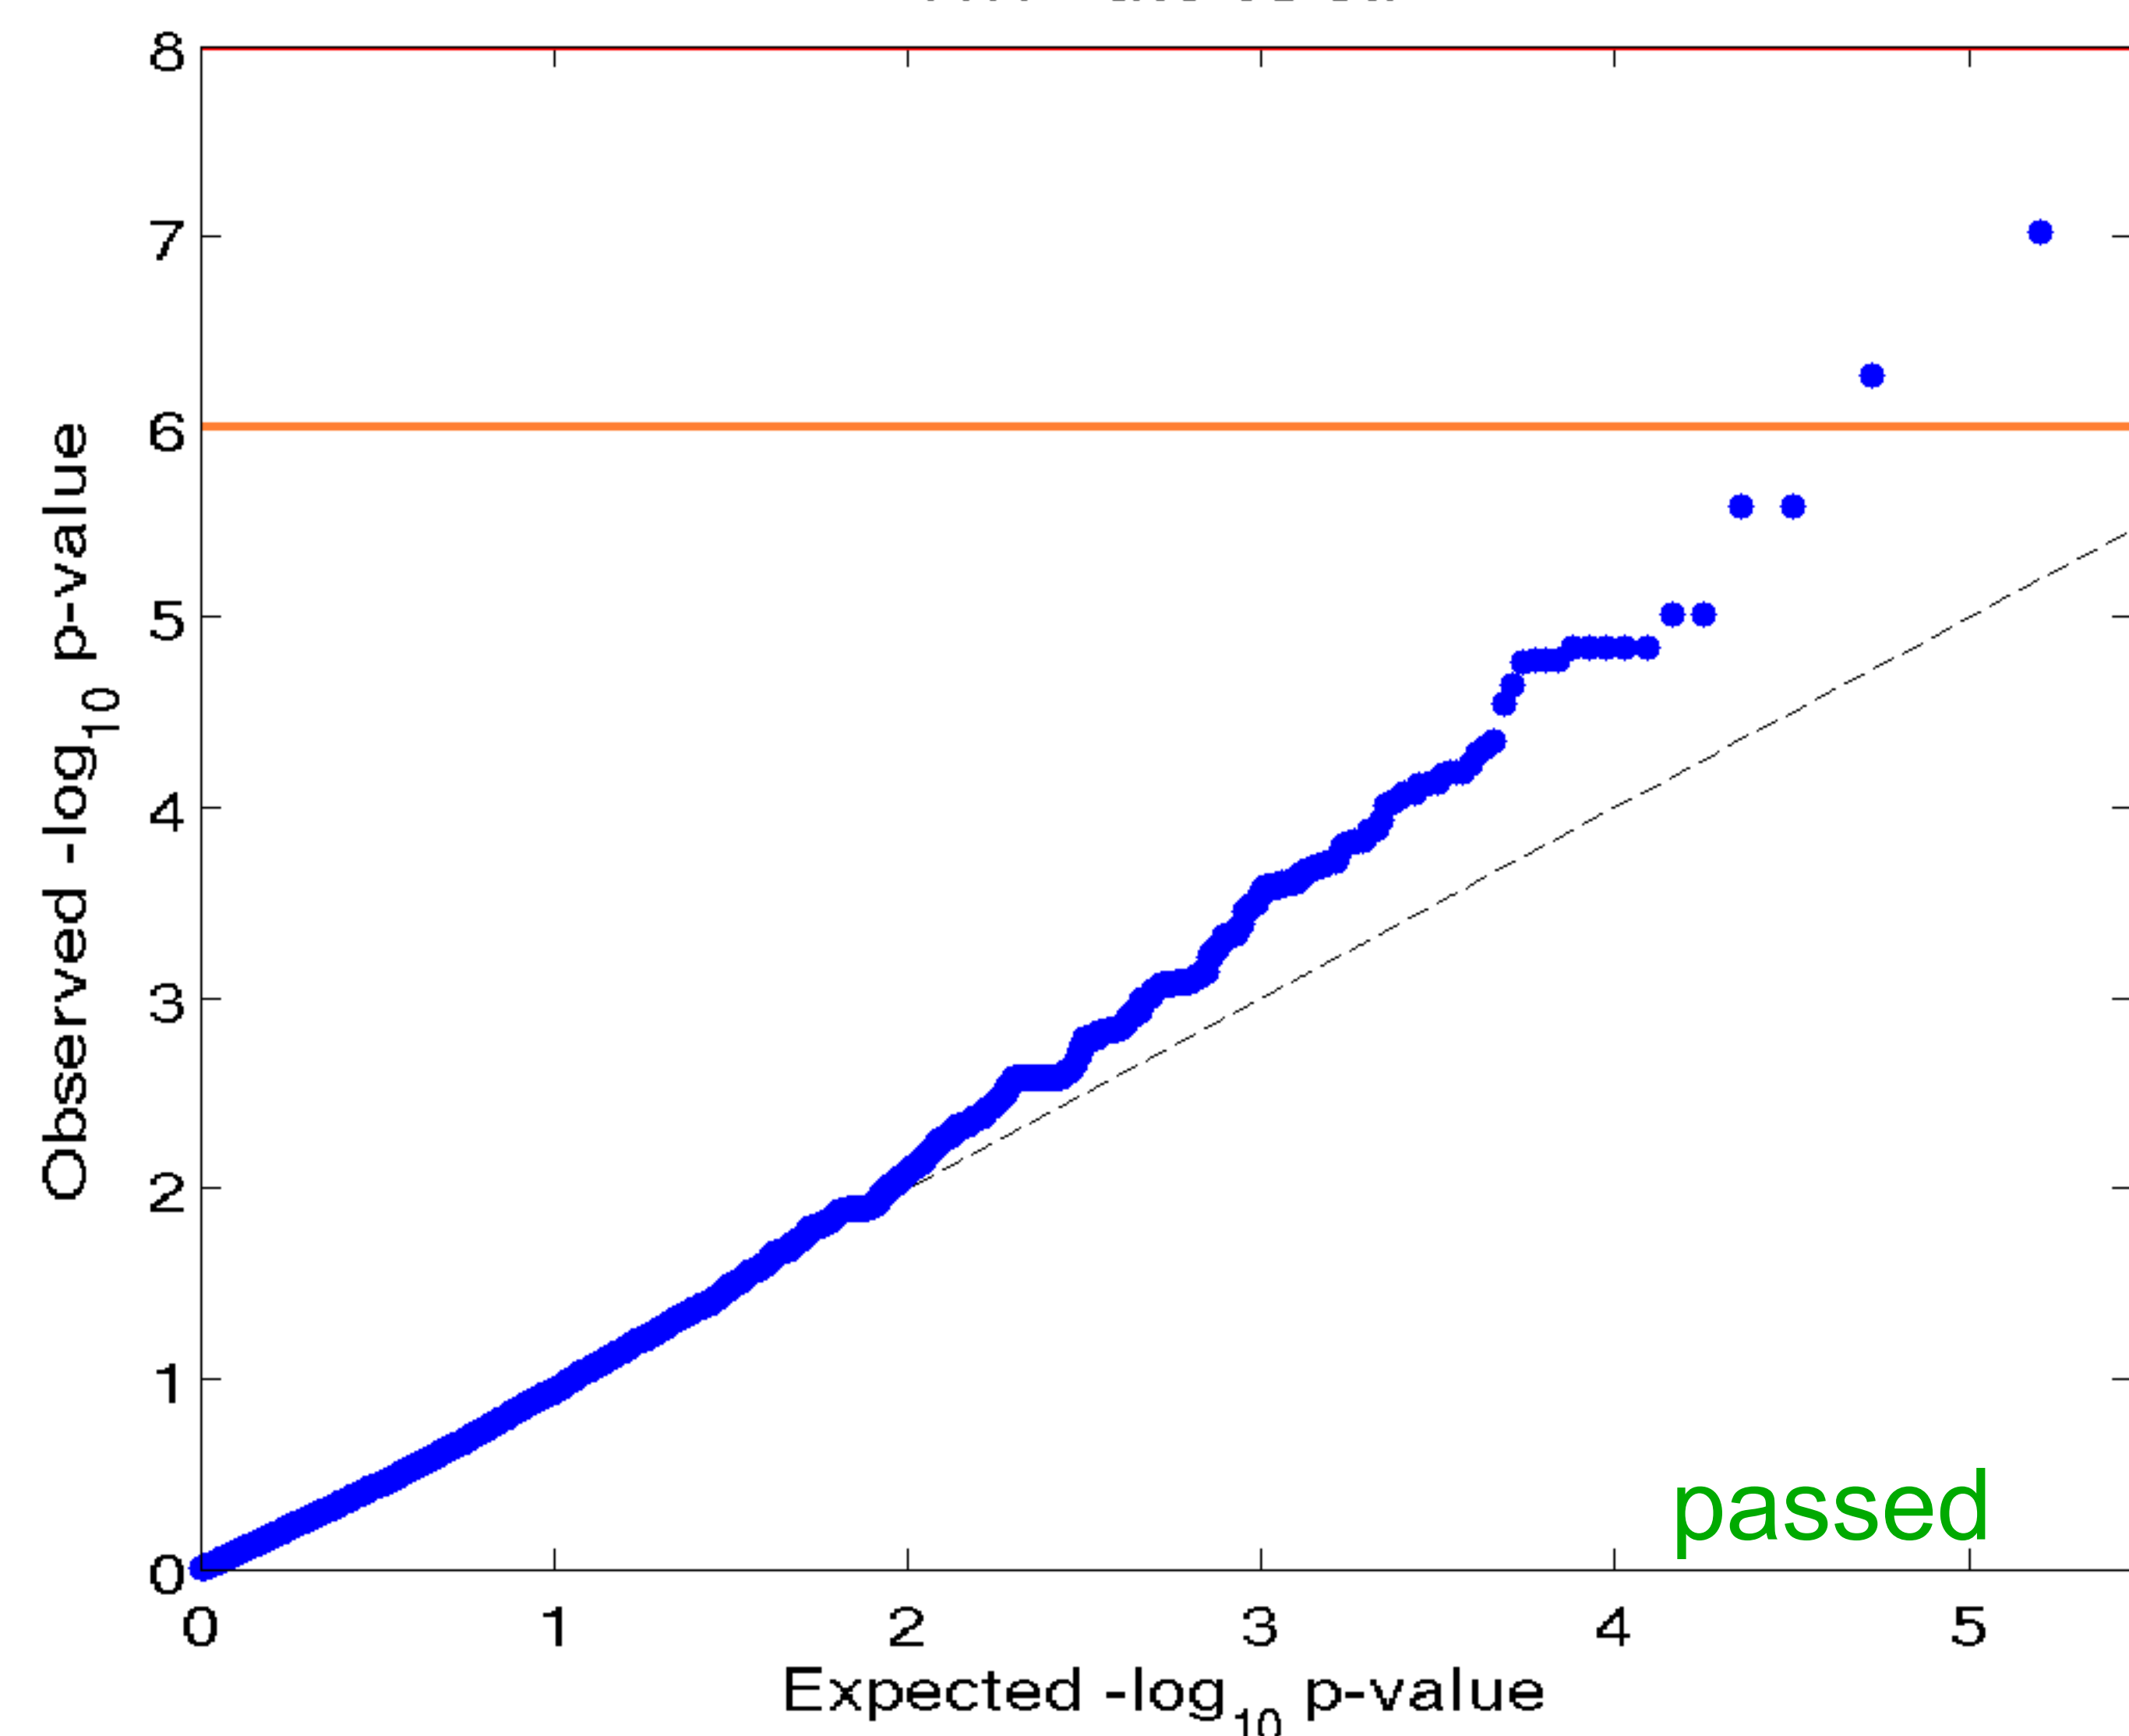

Pamp - ate vs ctr

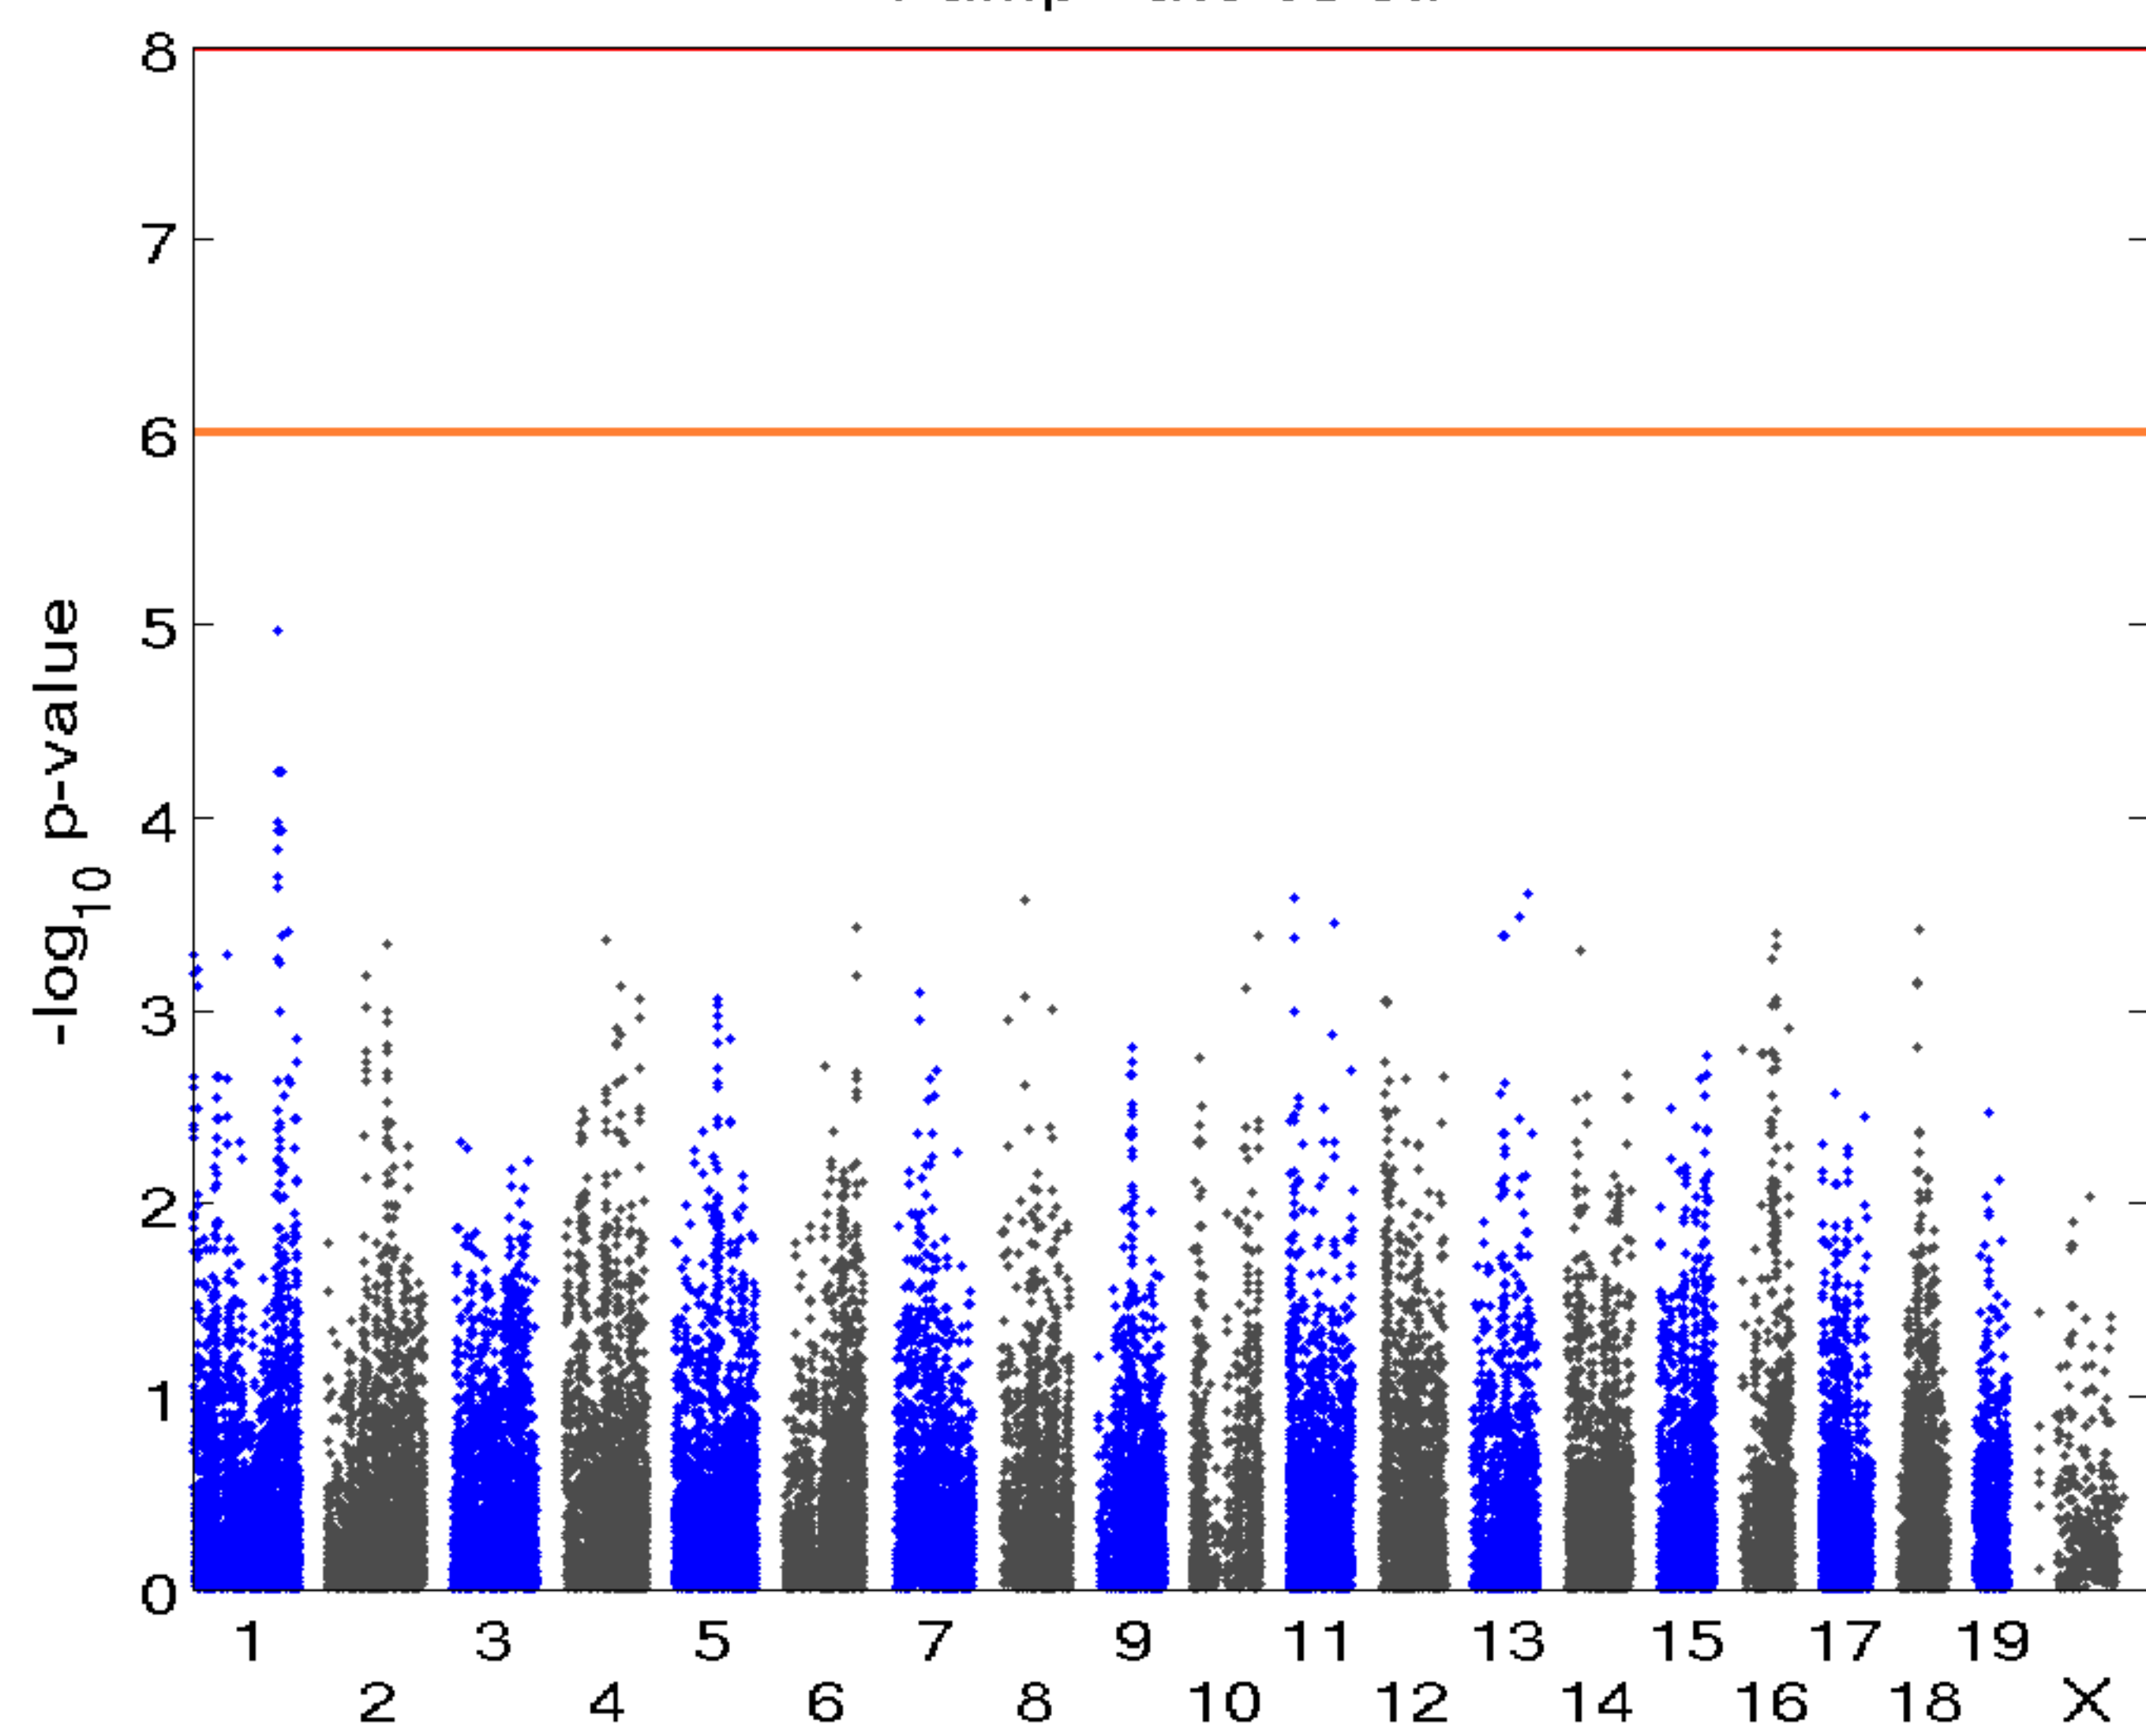

Pamp - ate vs ctr

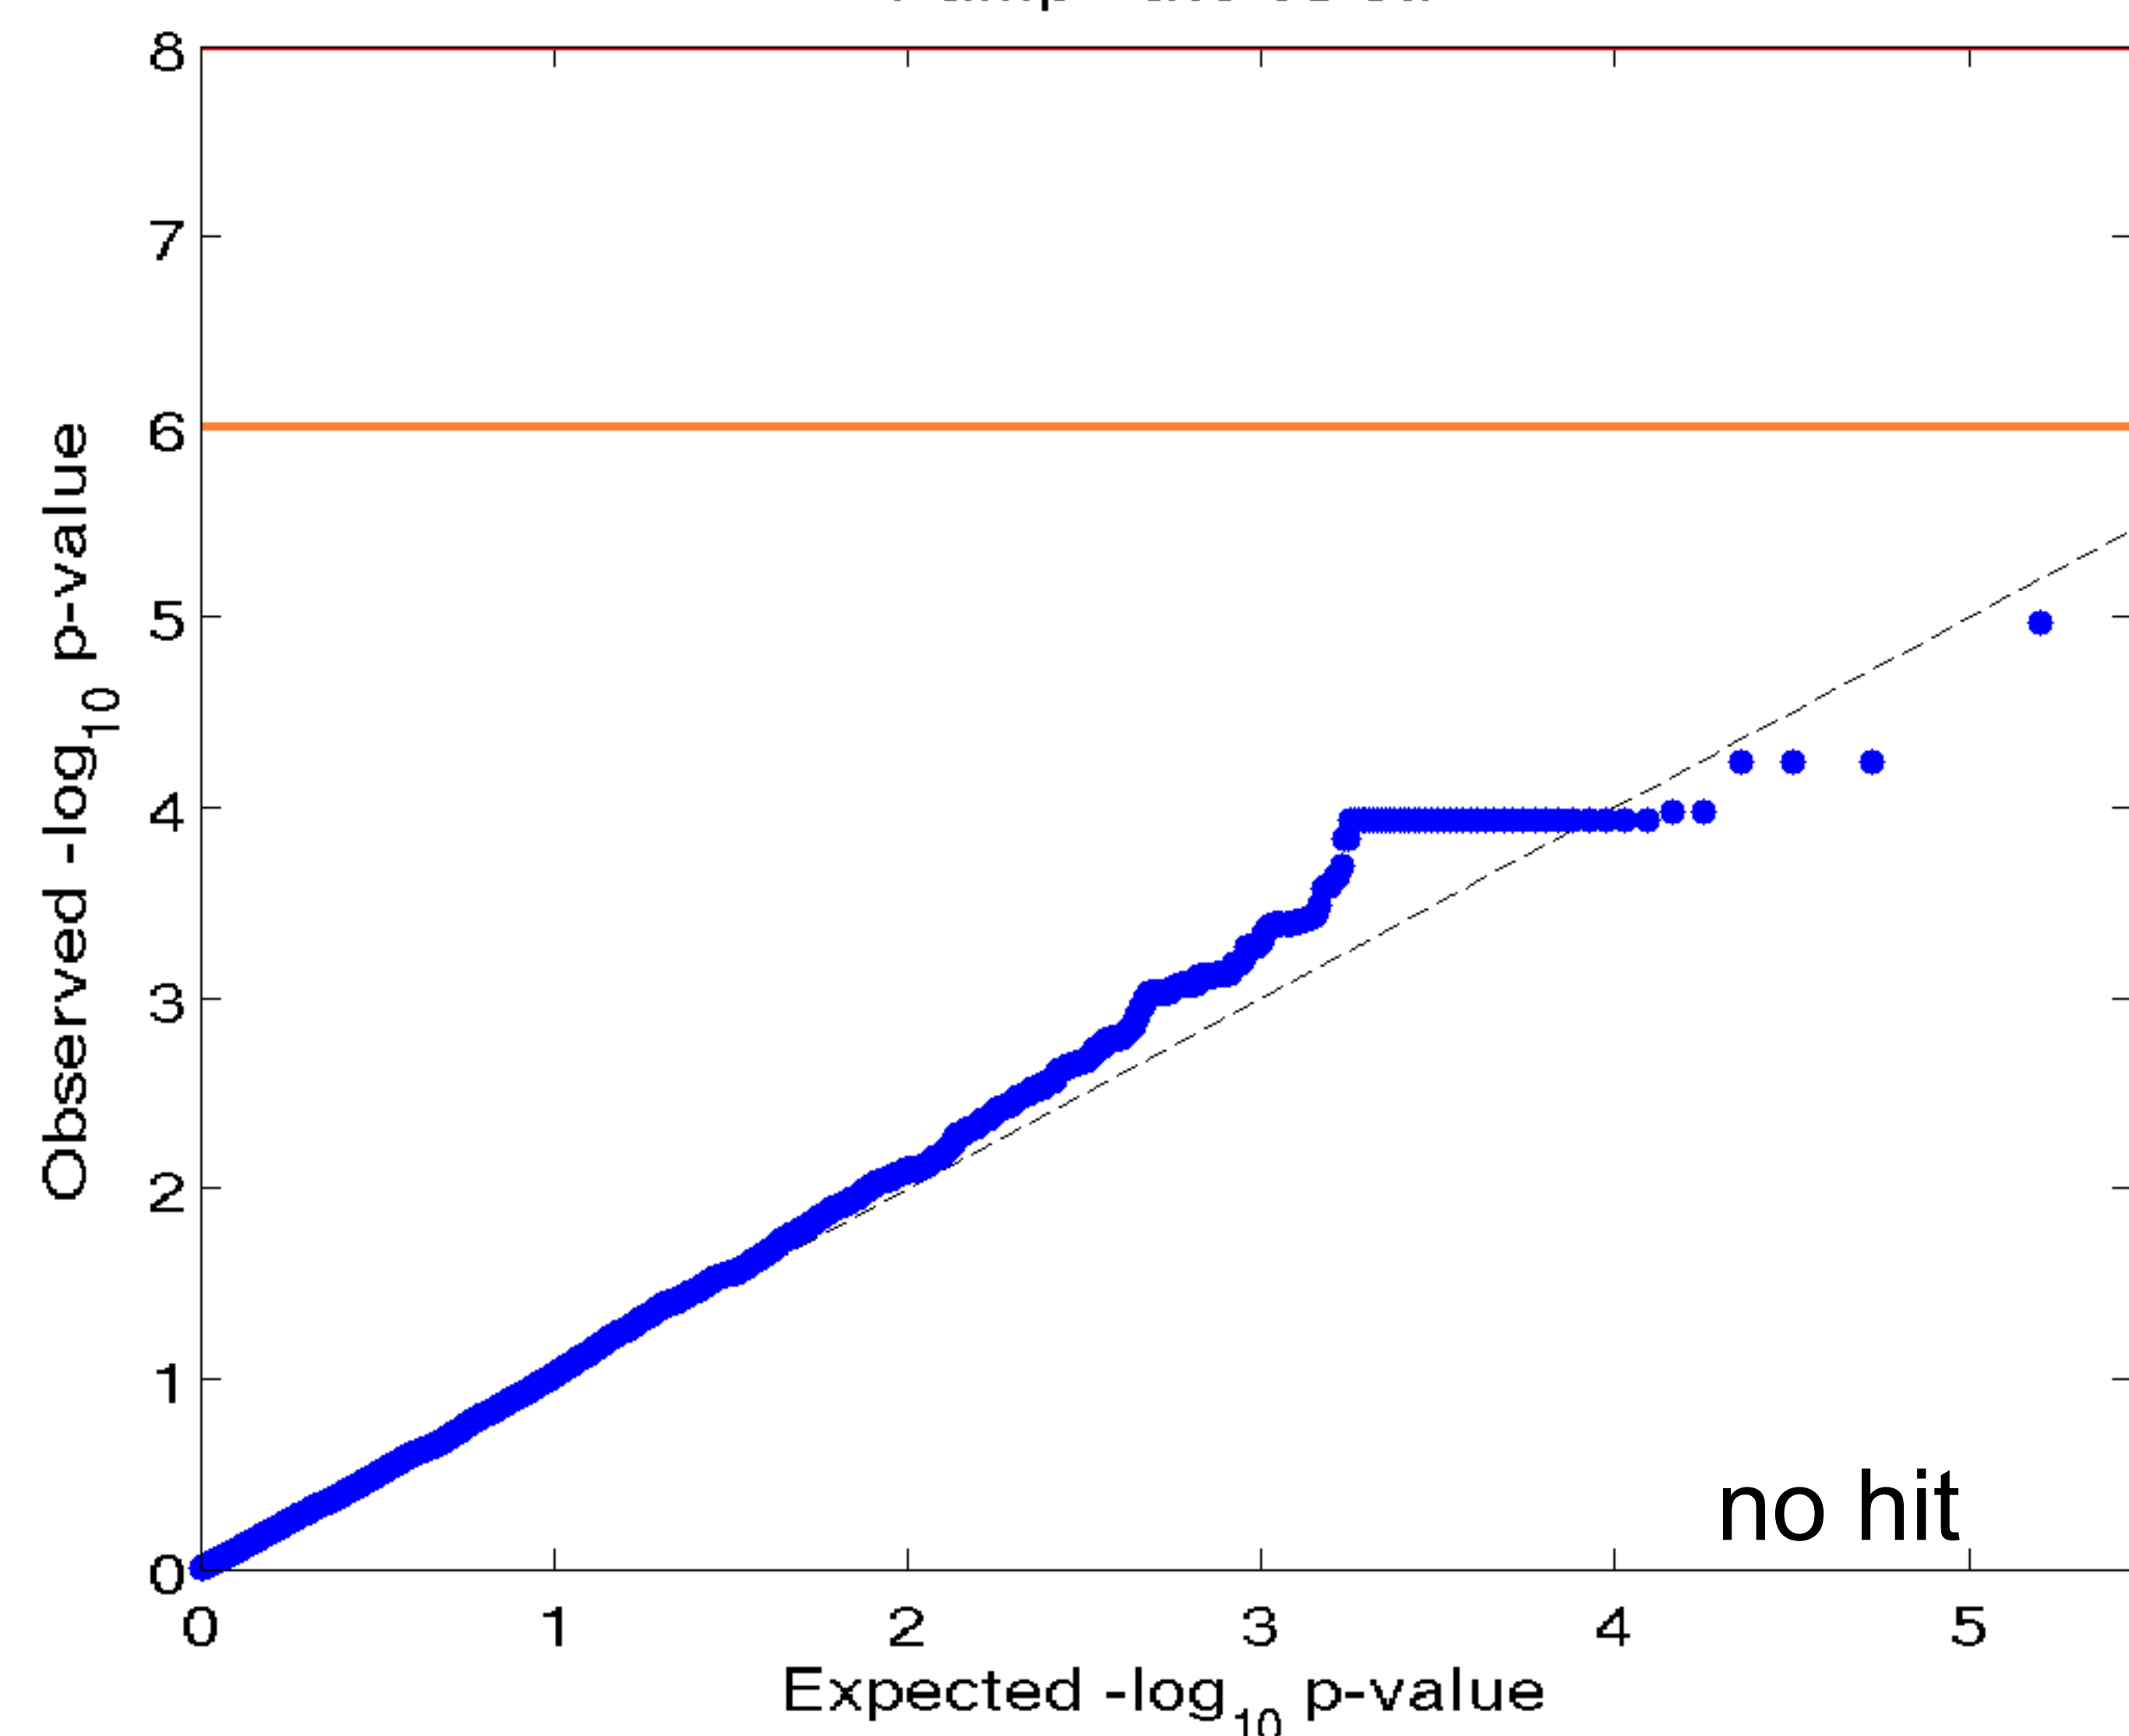



Parea - ate vs ctr

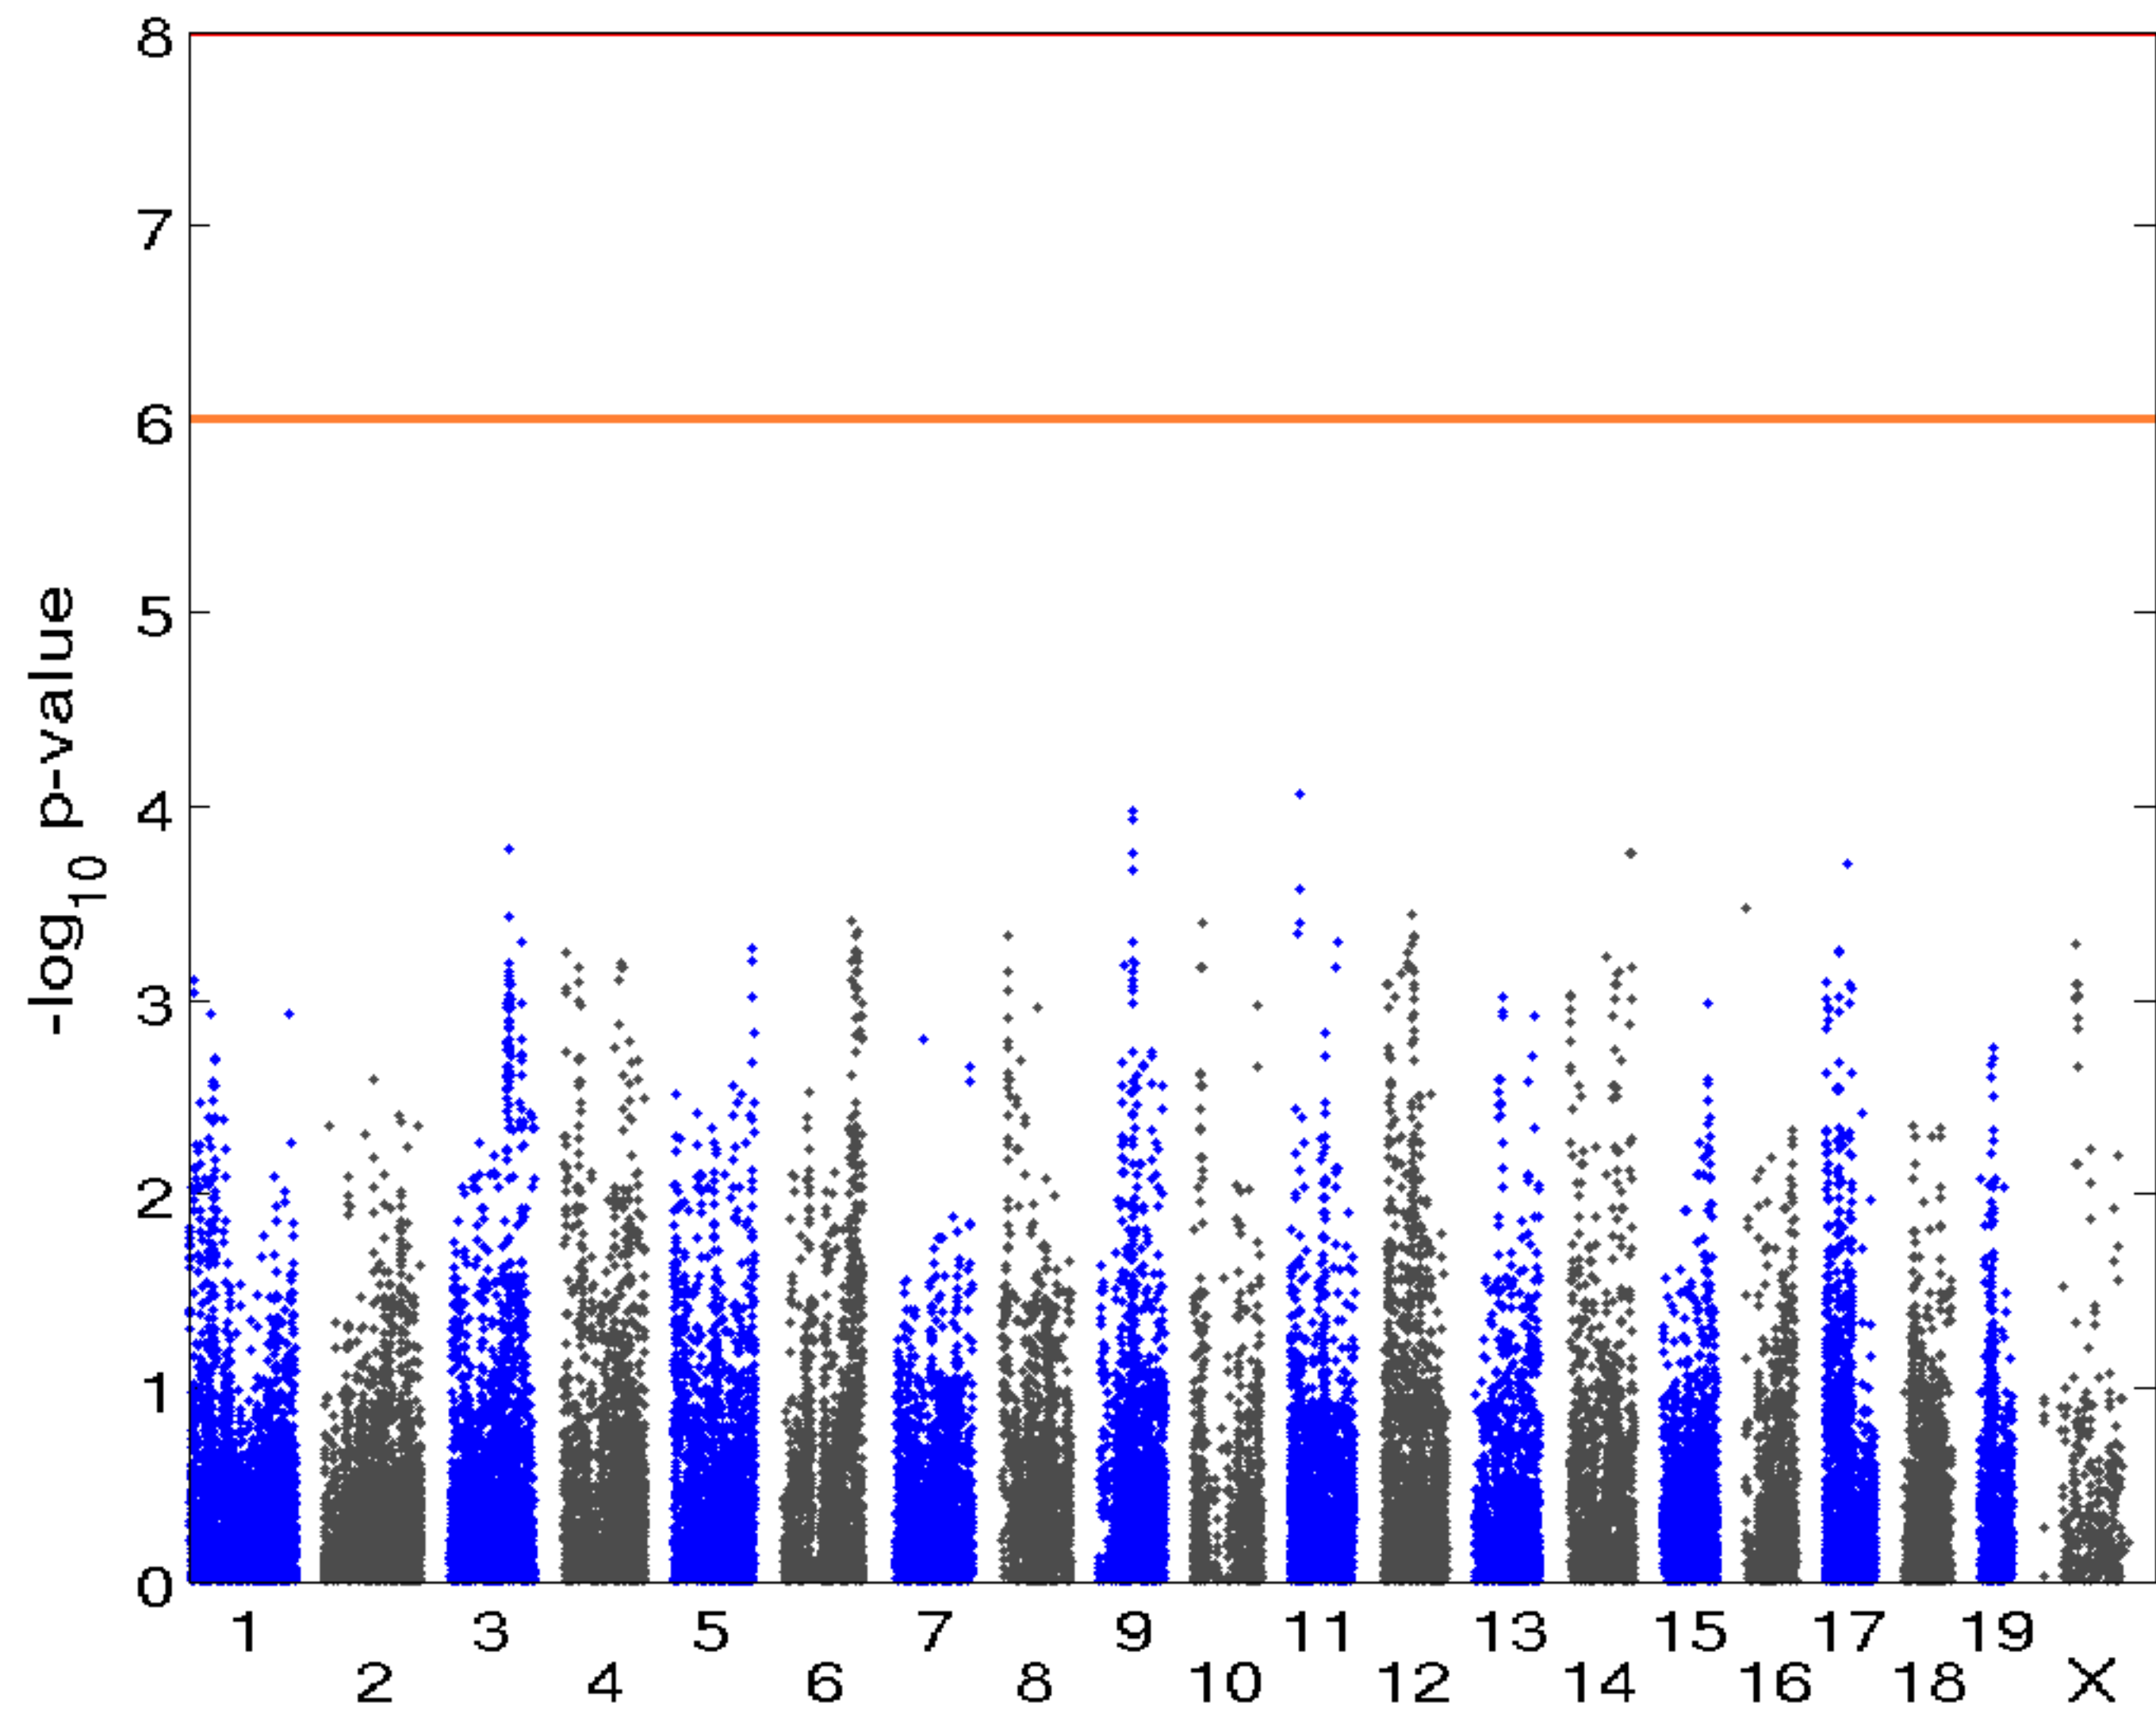

Parea - ate vs ctr

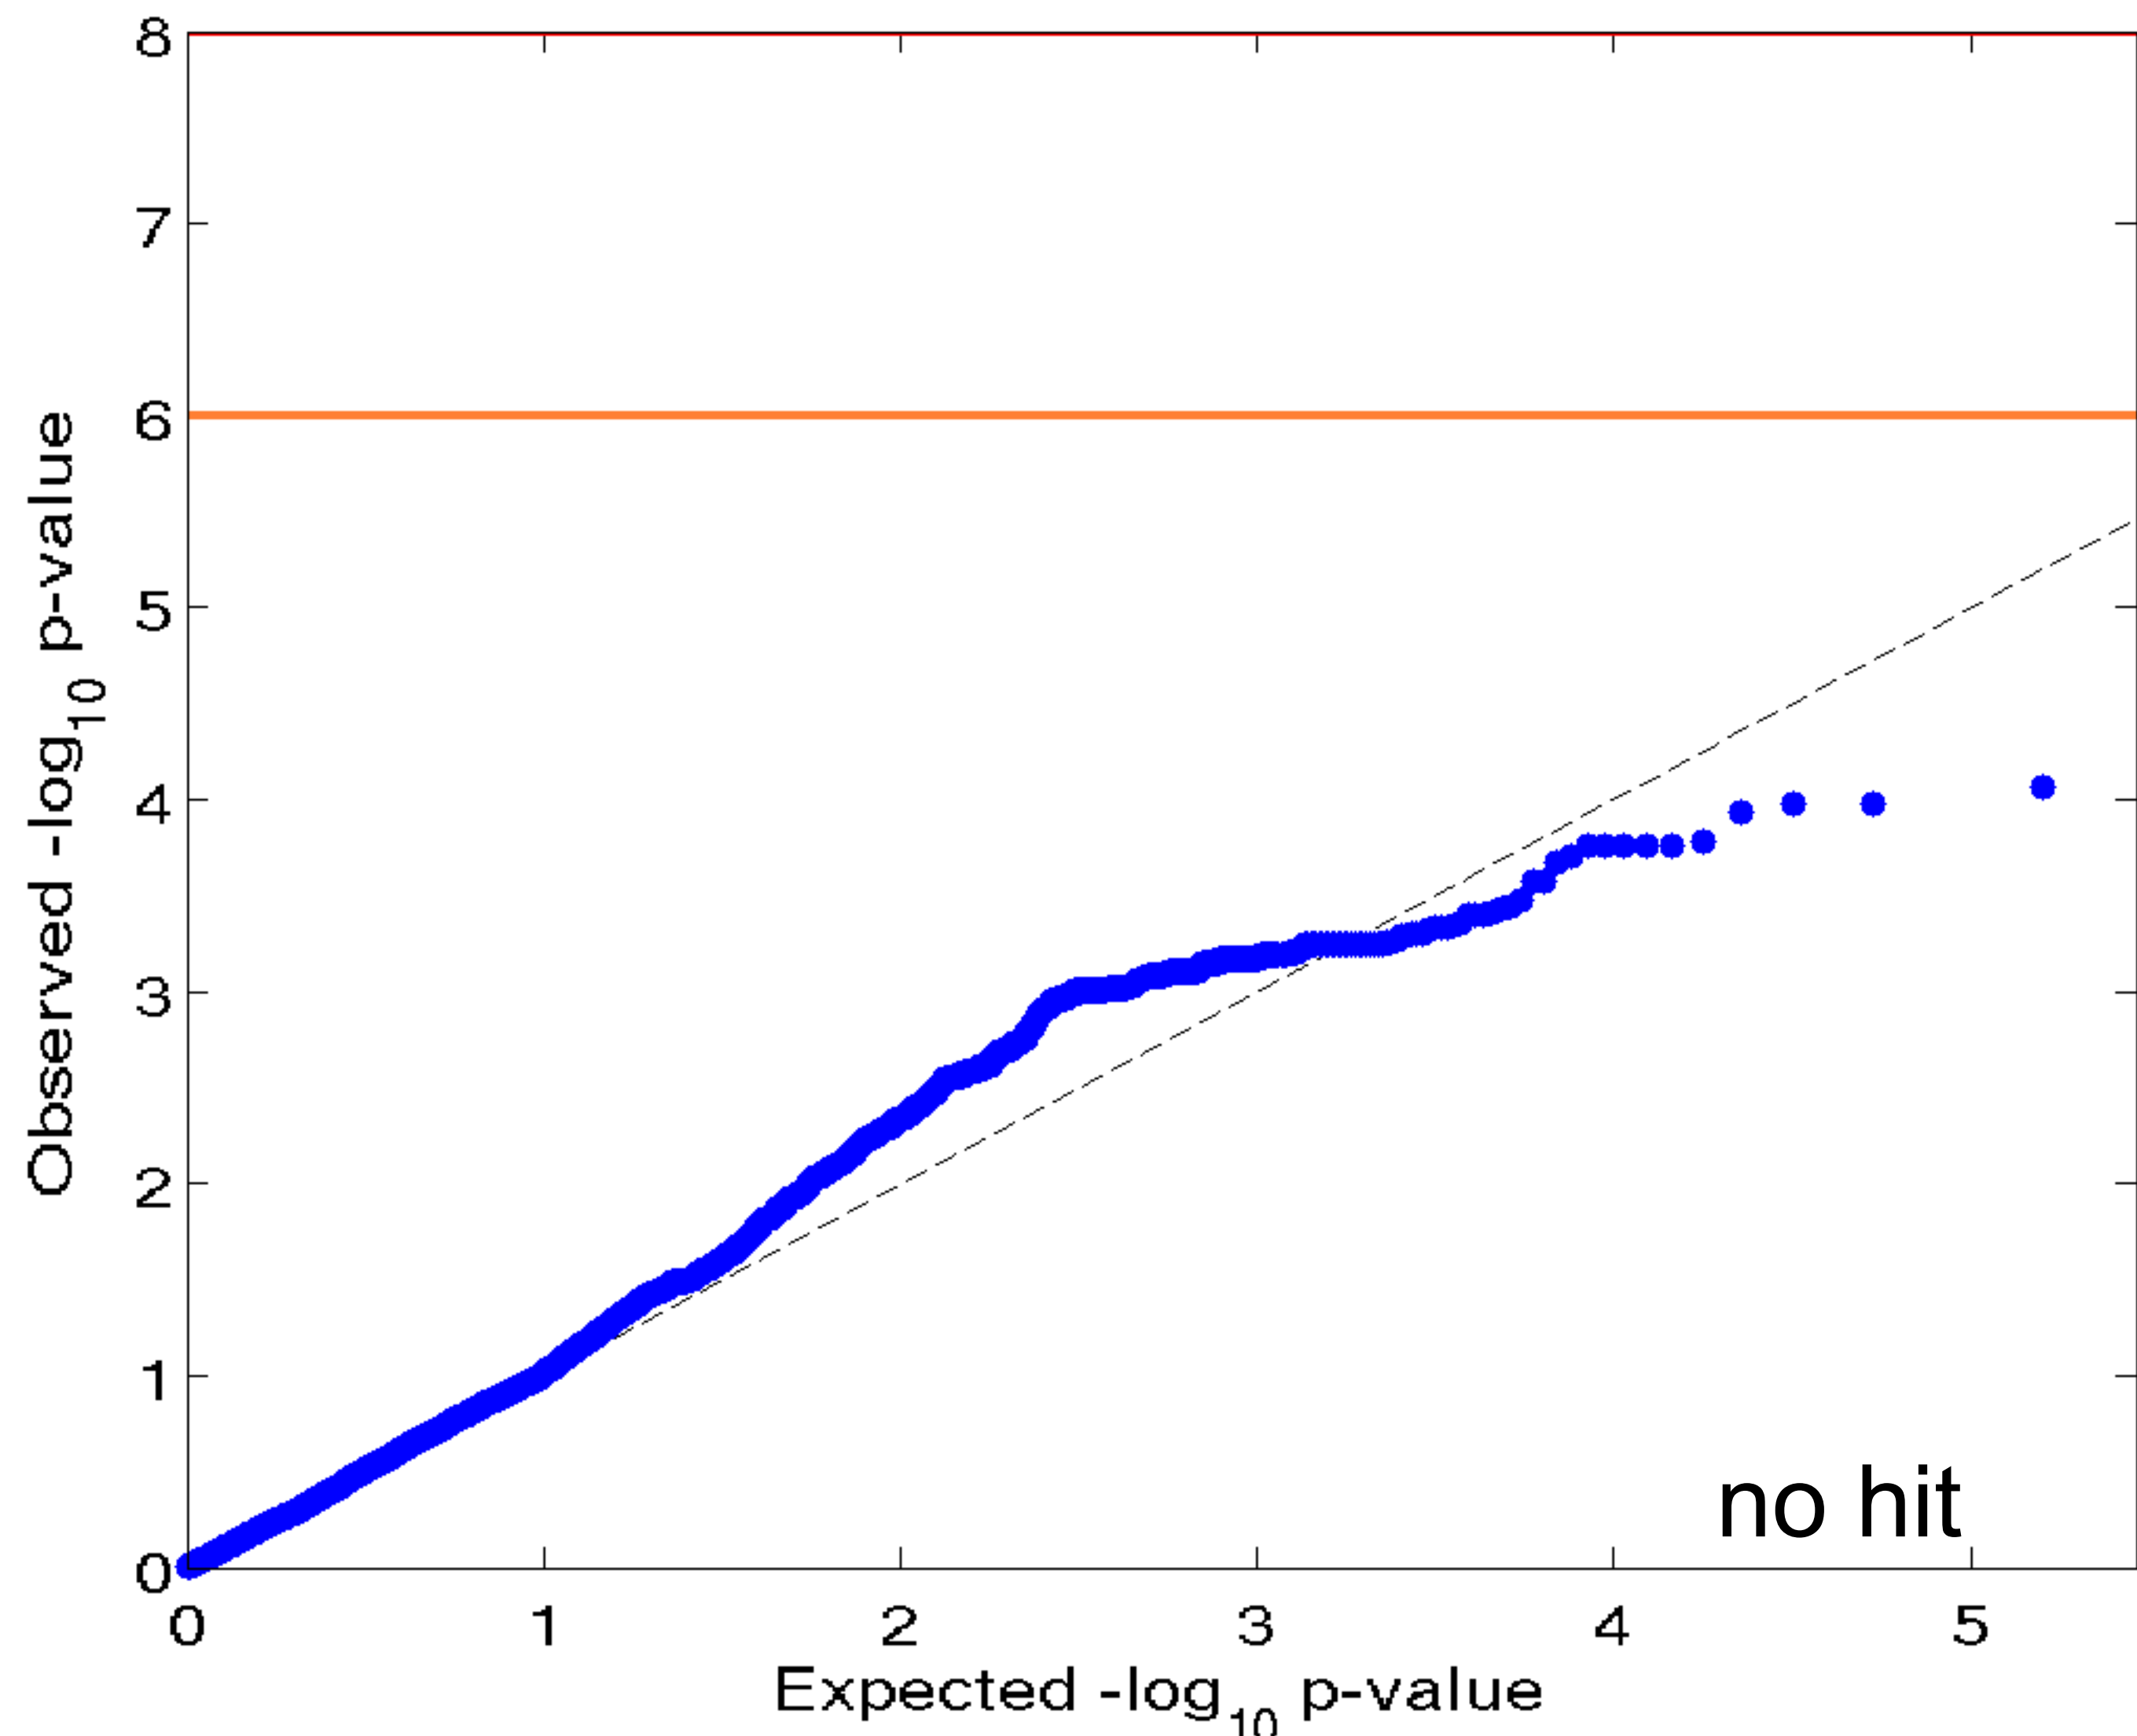

Pdur - ate vs ctr

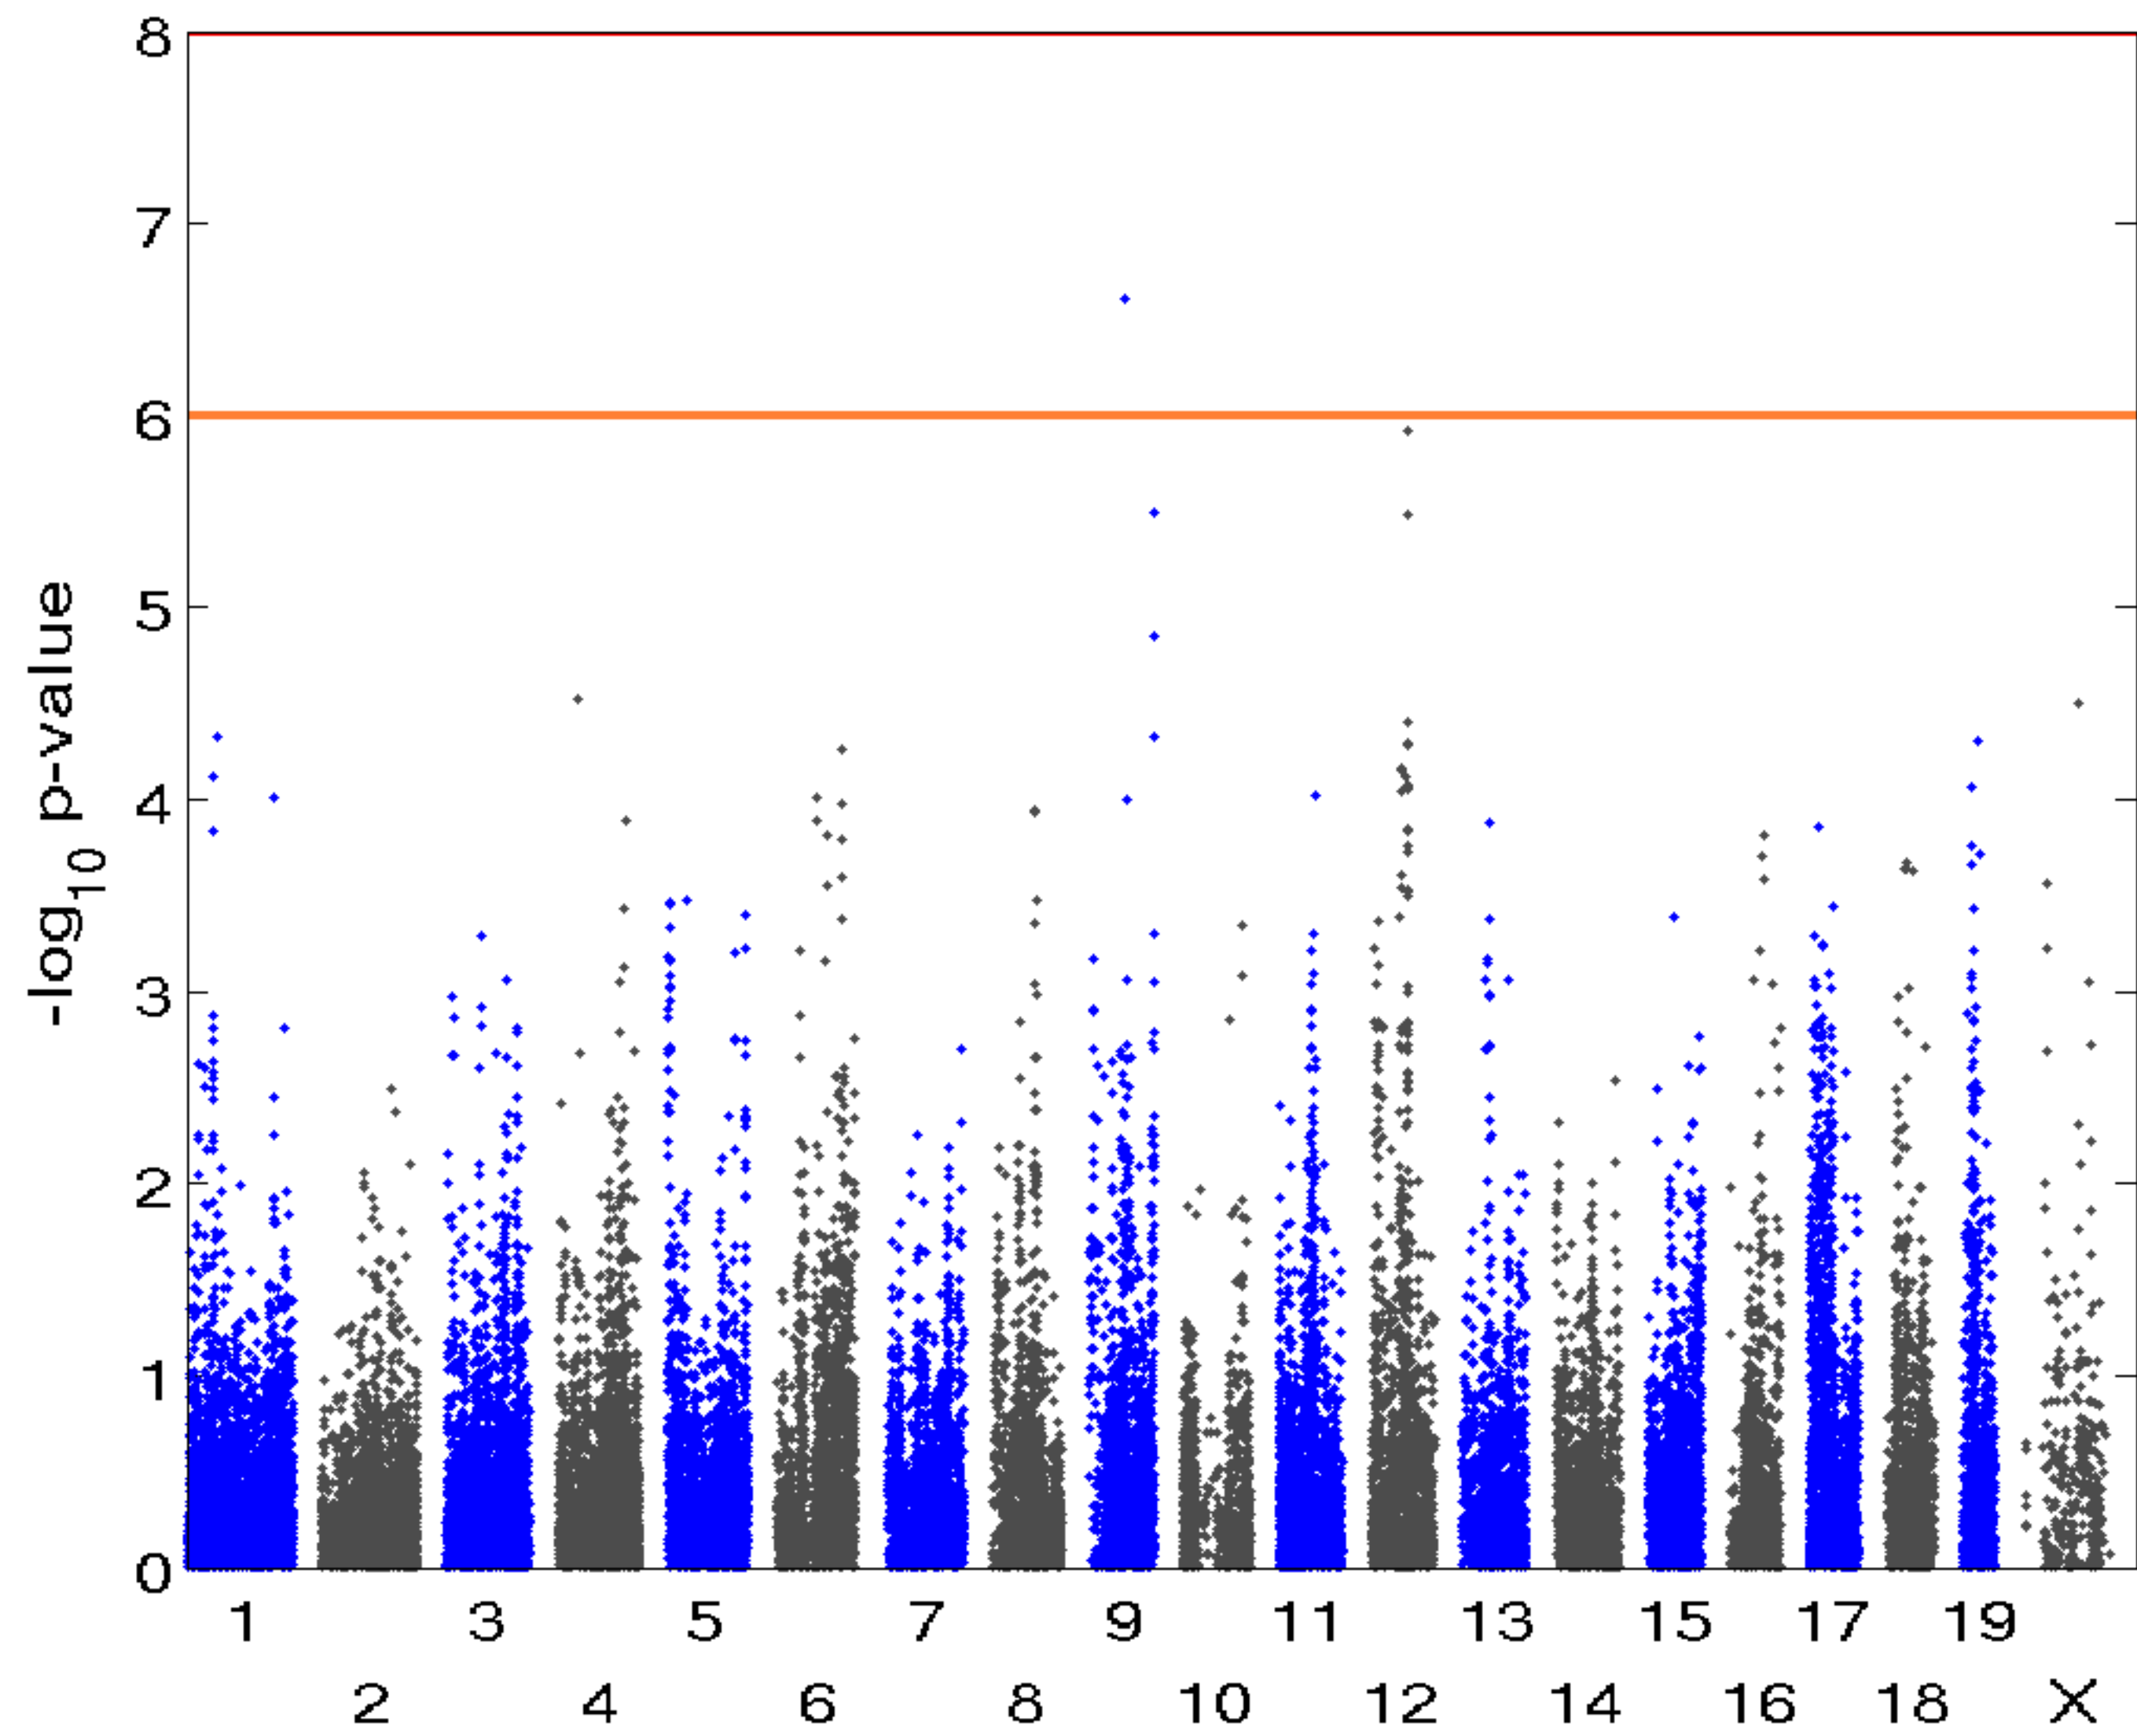

Pdur - ate vs ctr

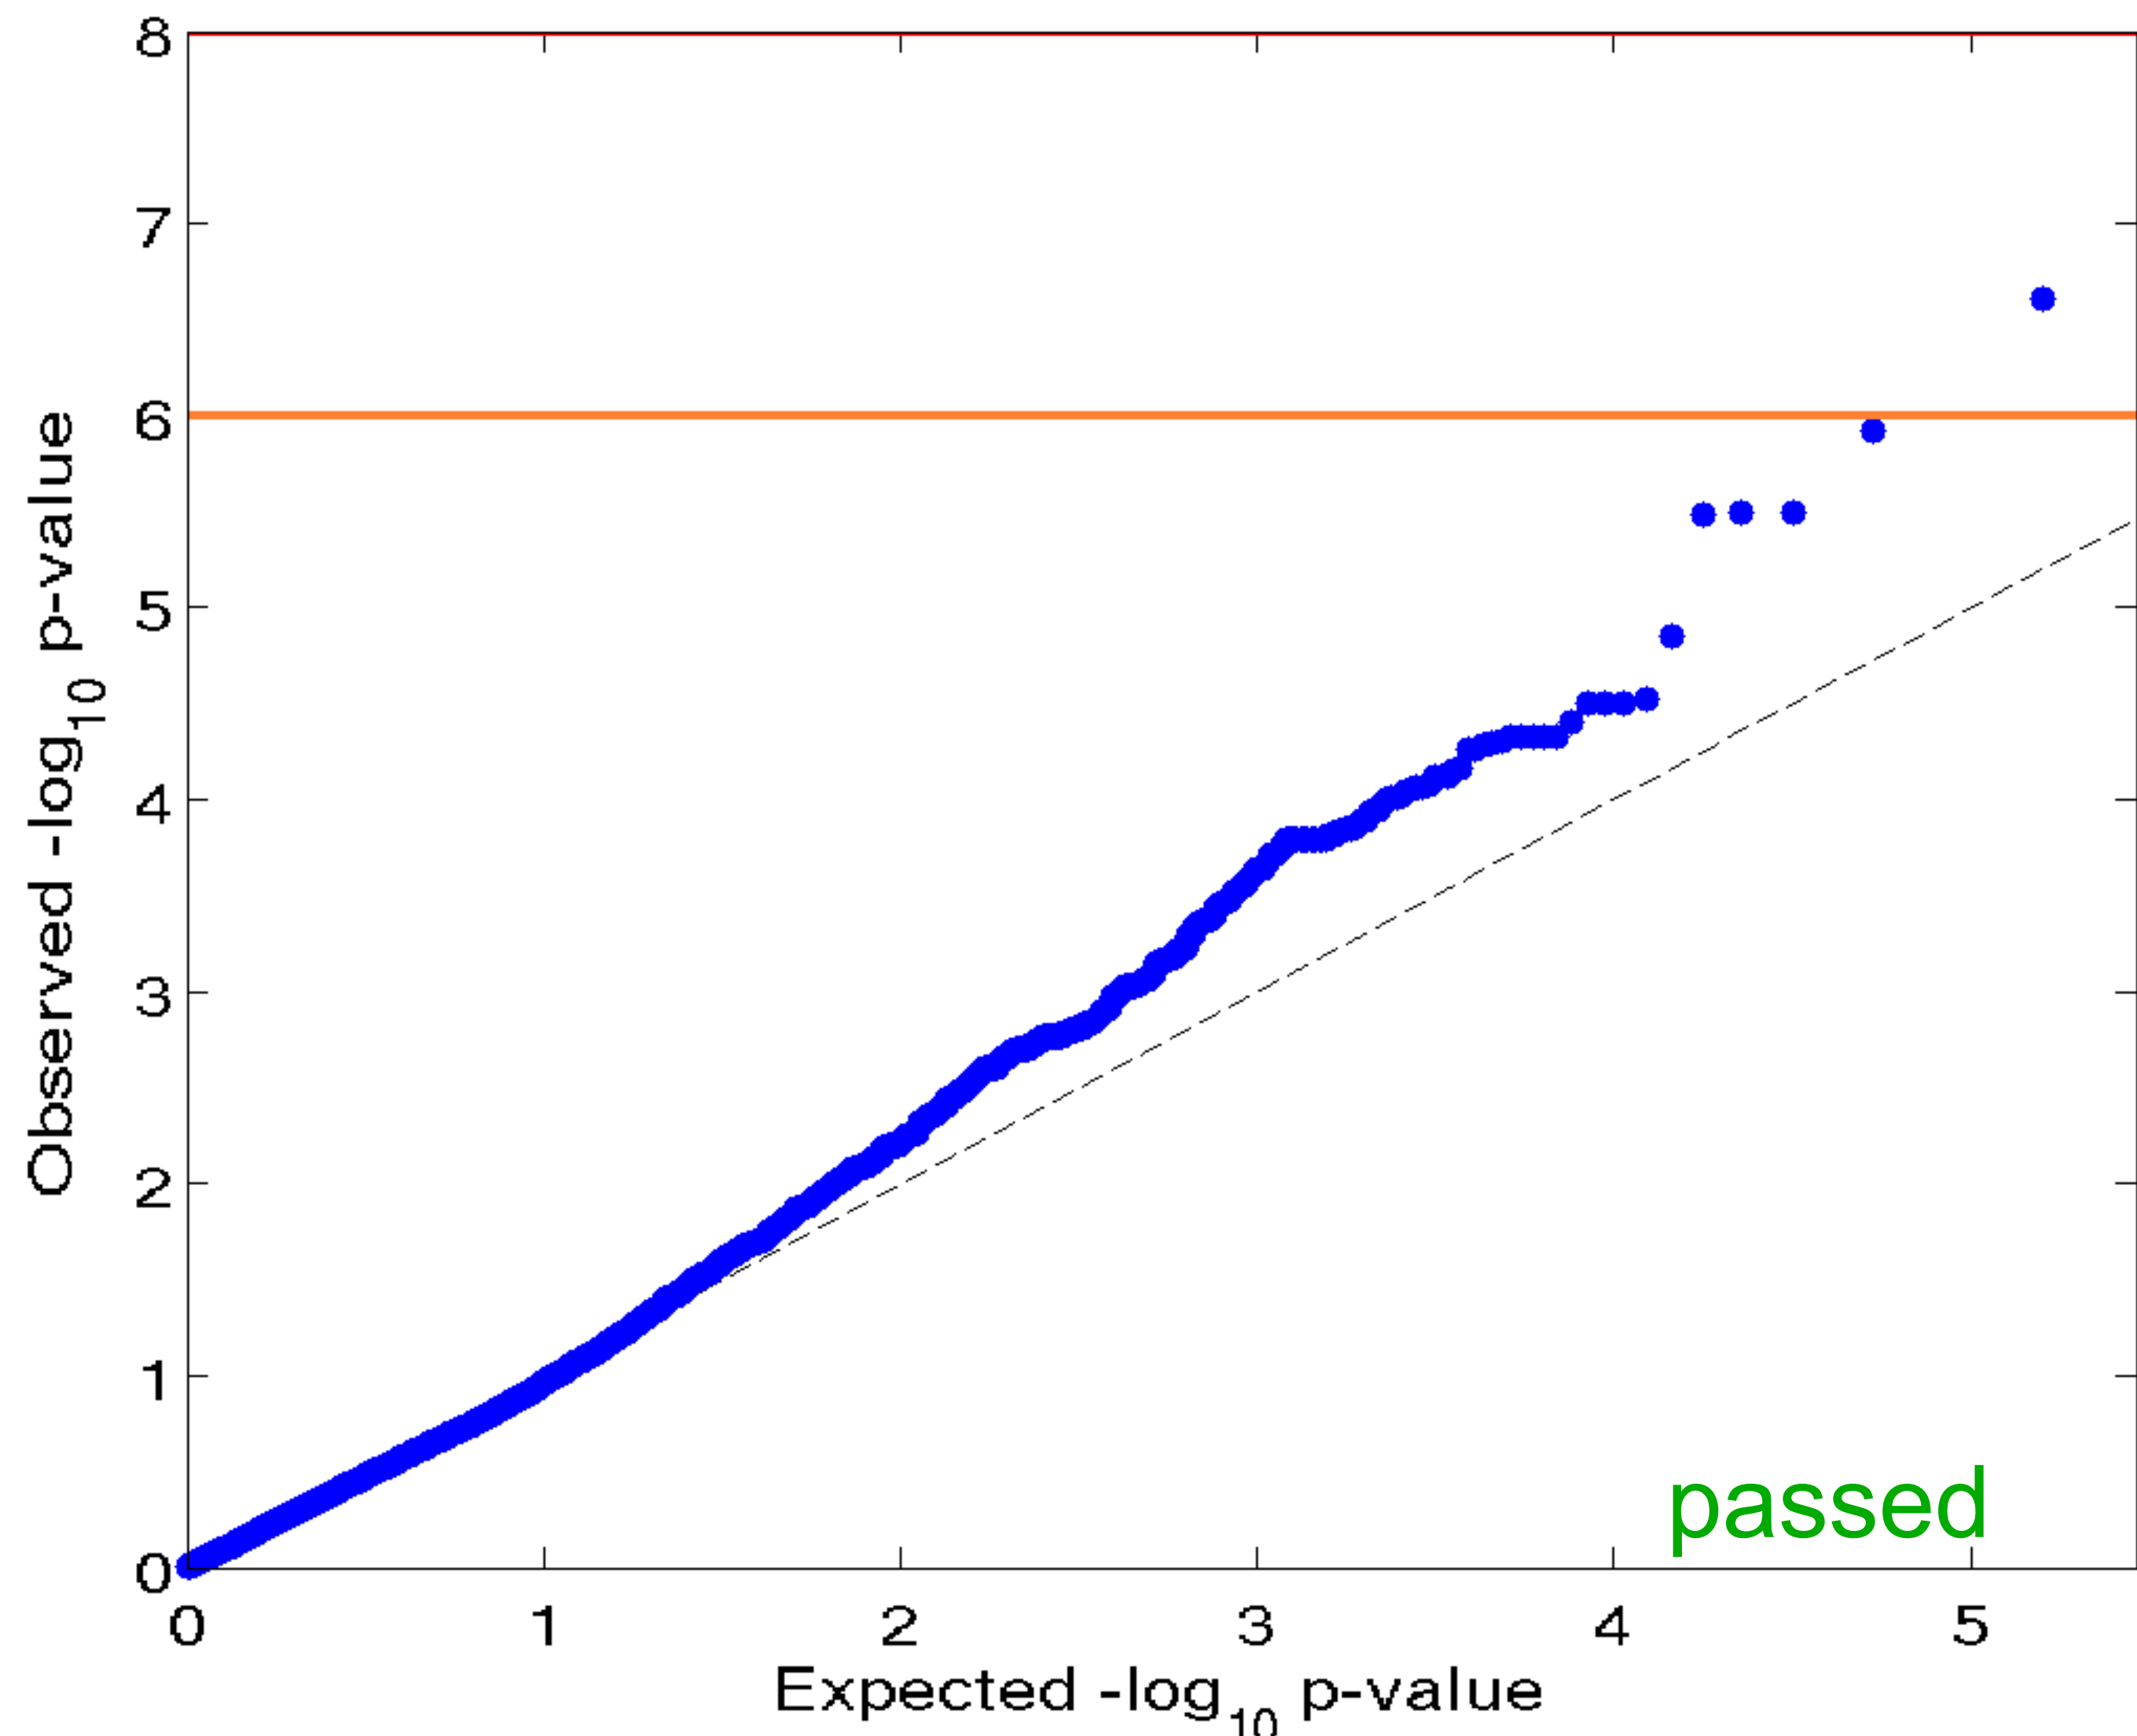

PR - ate vs ctr

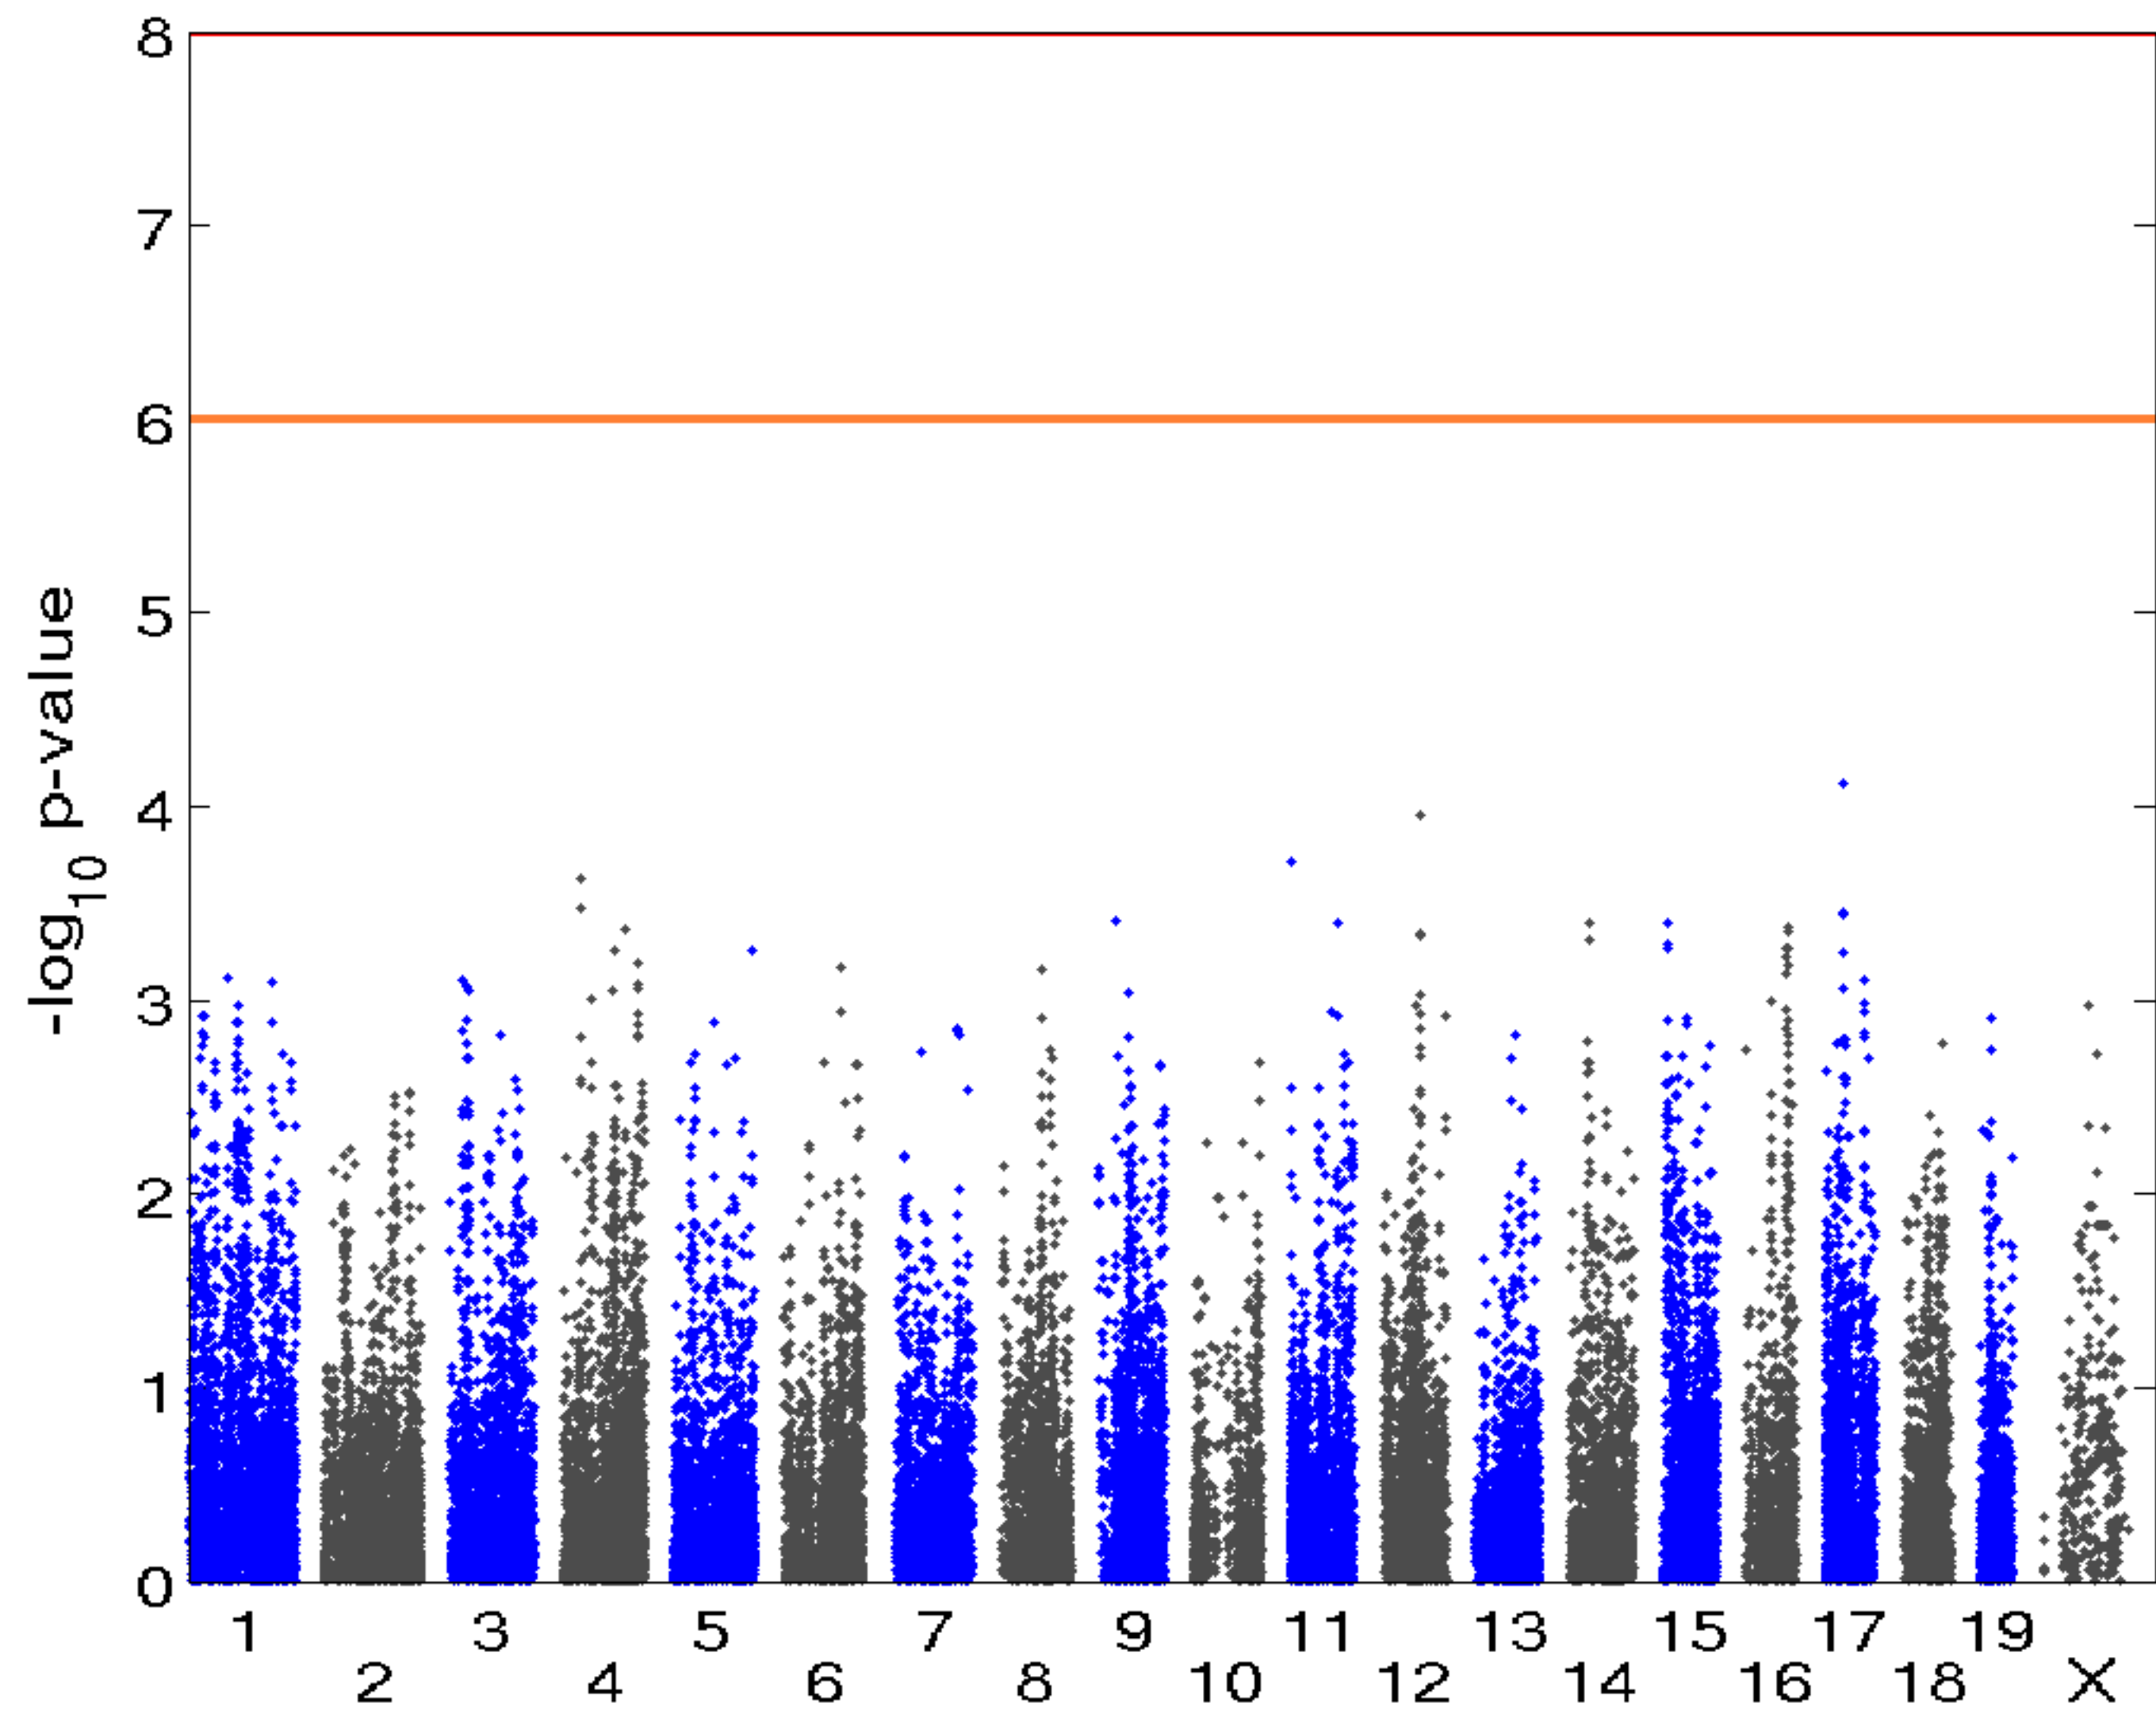

PR - ate vs ctr

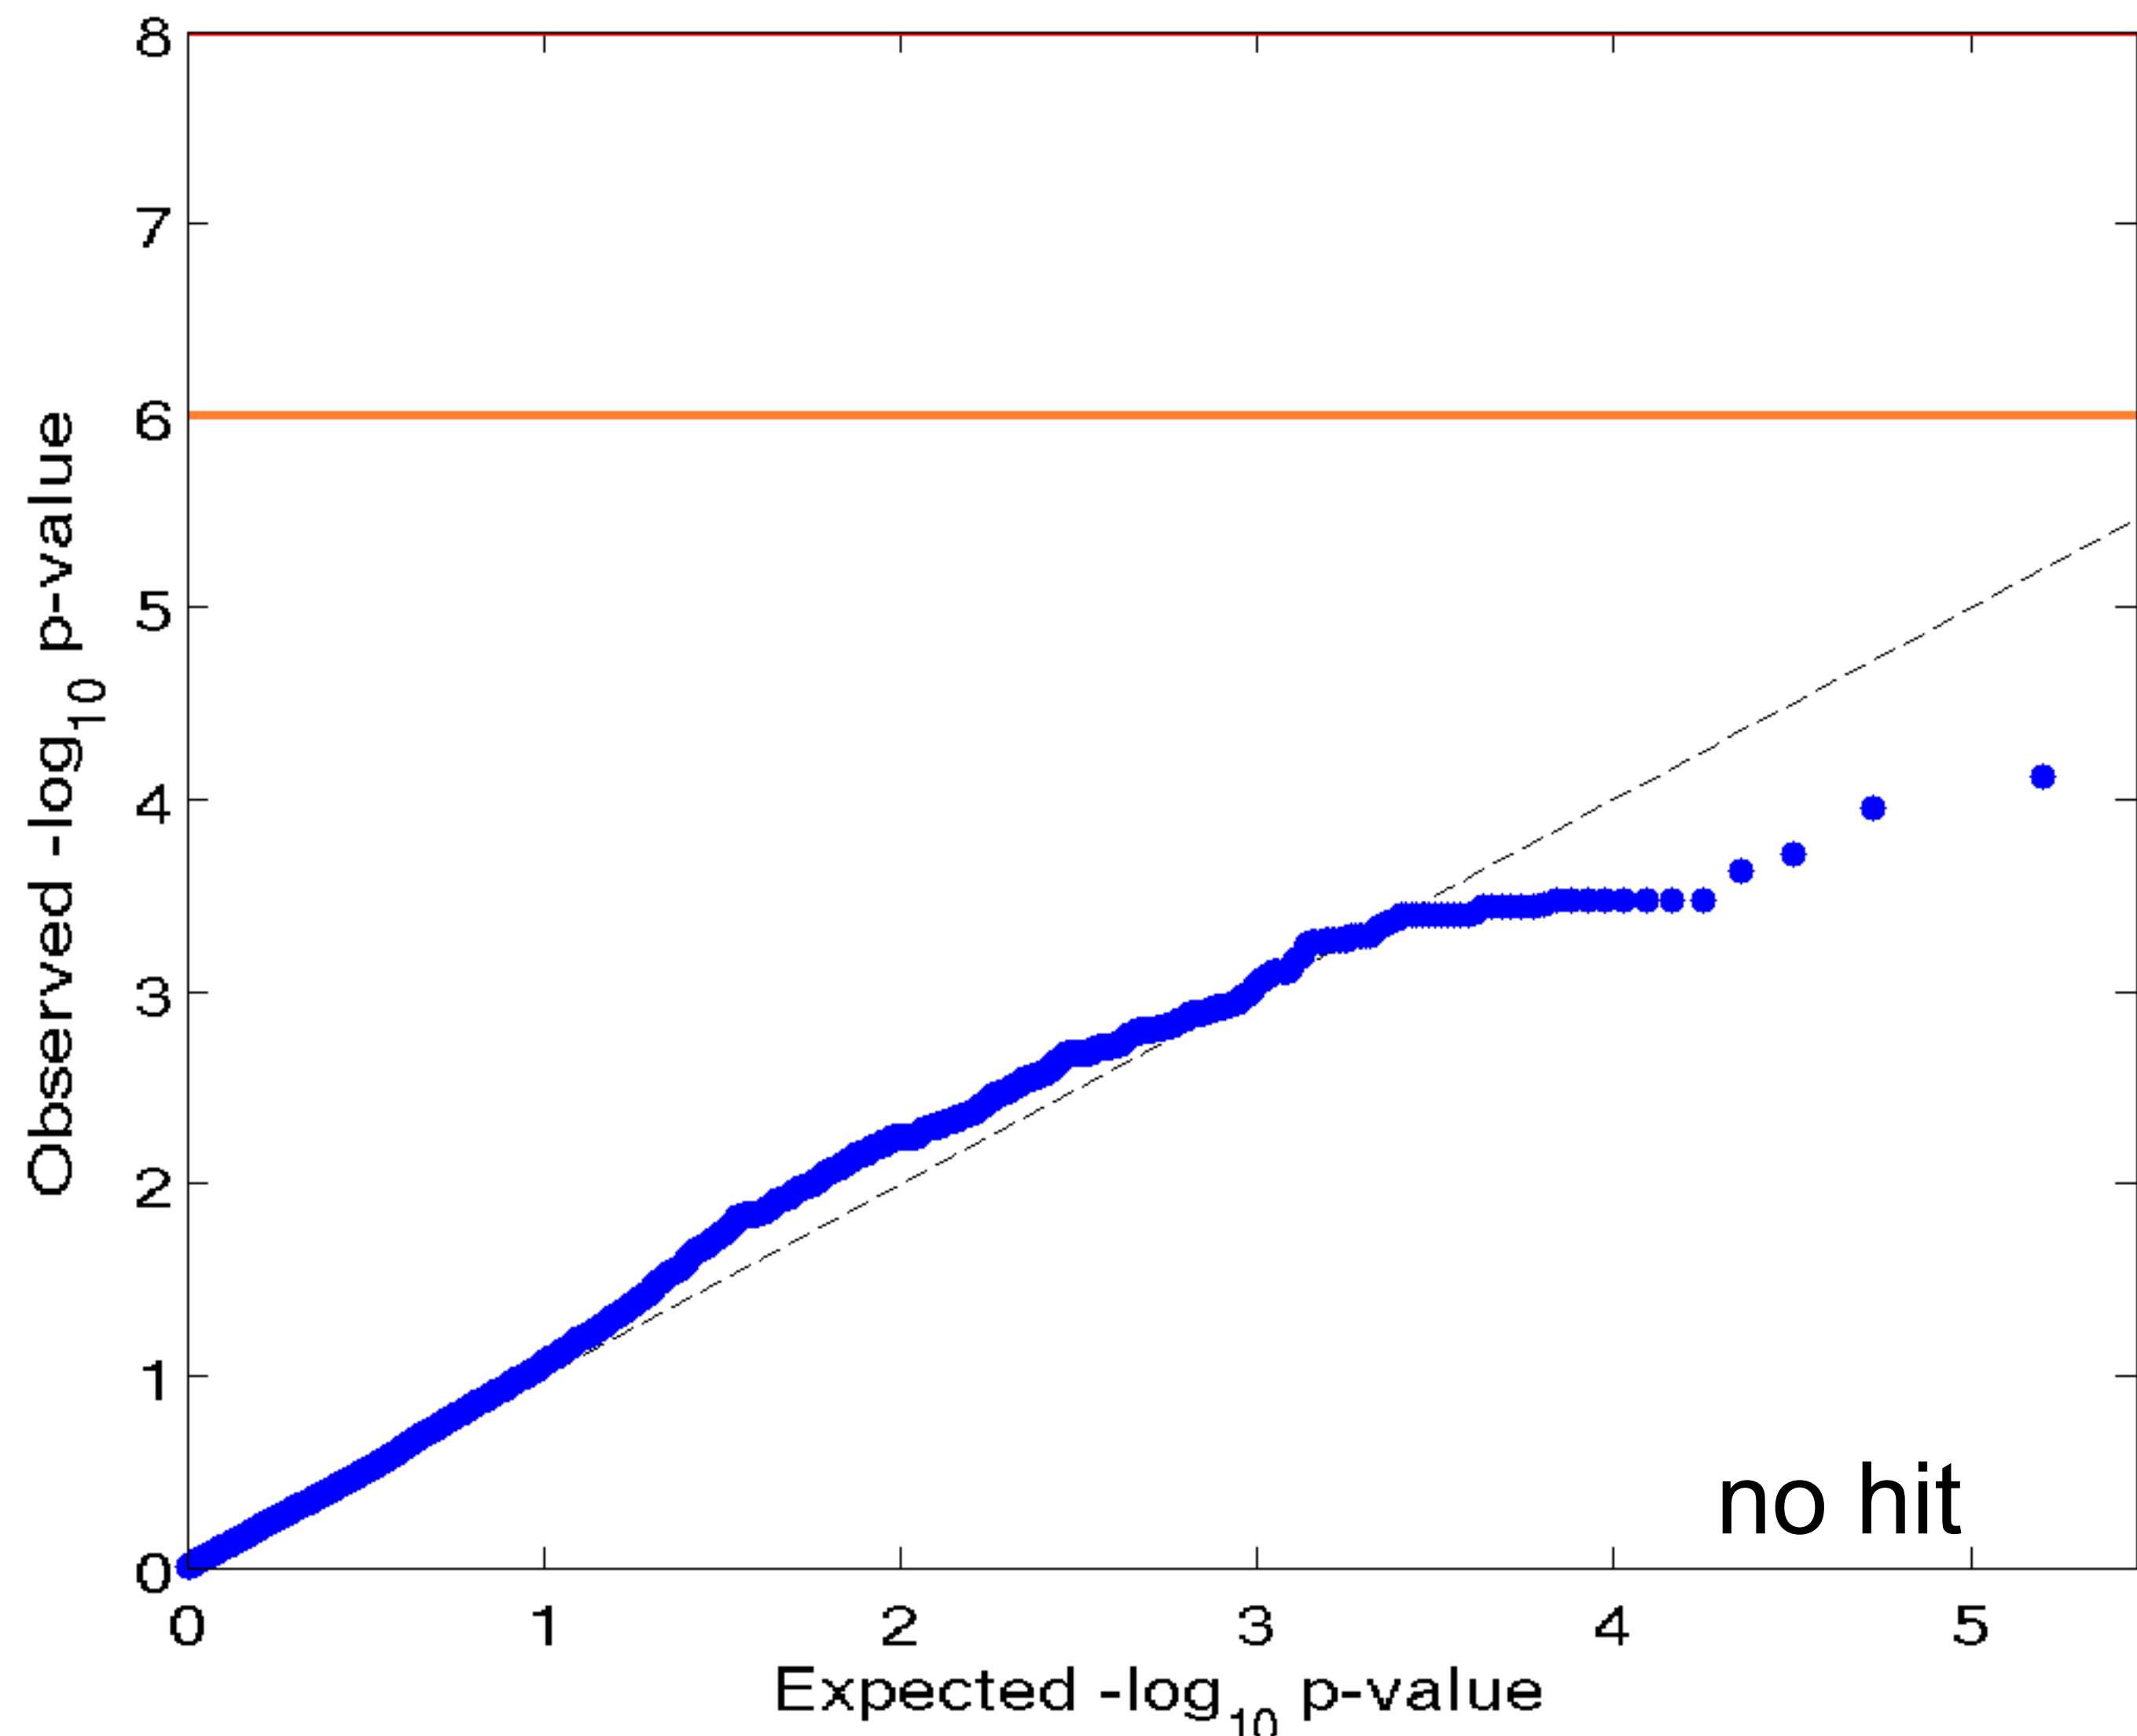

Qamp - ate vs ctr

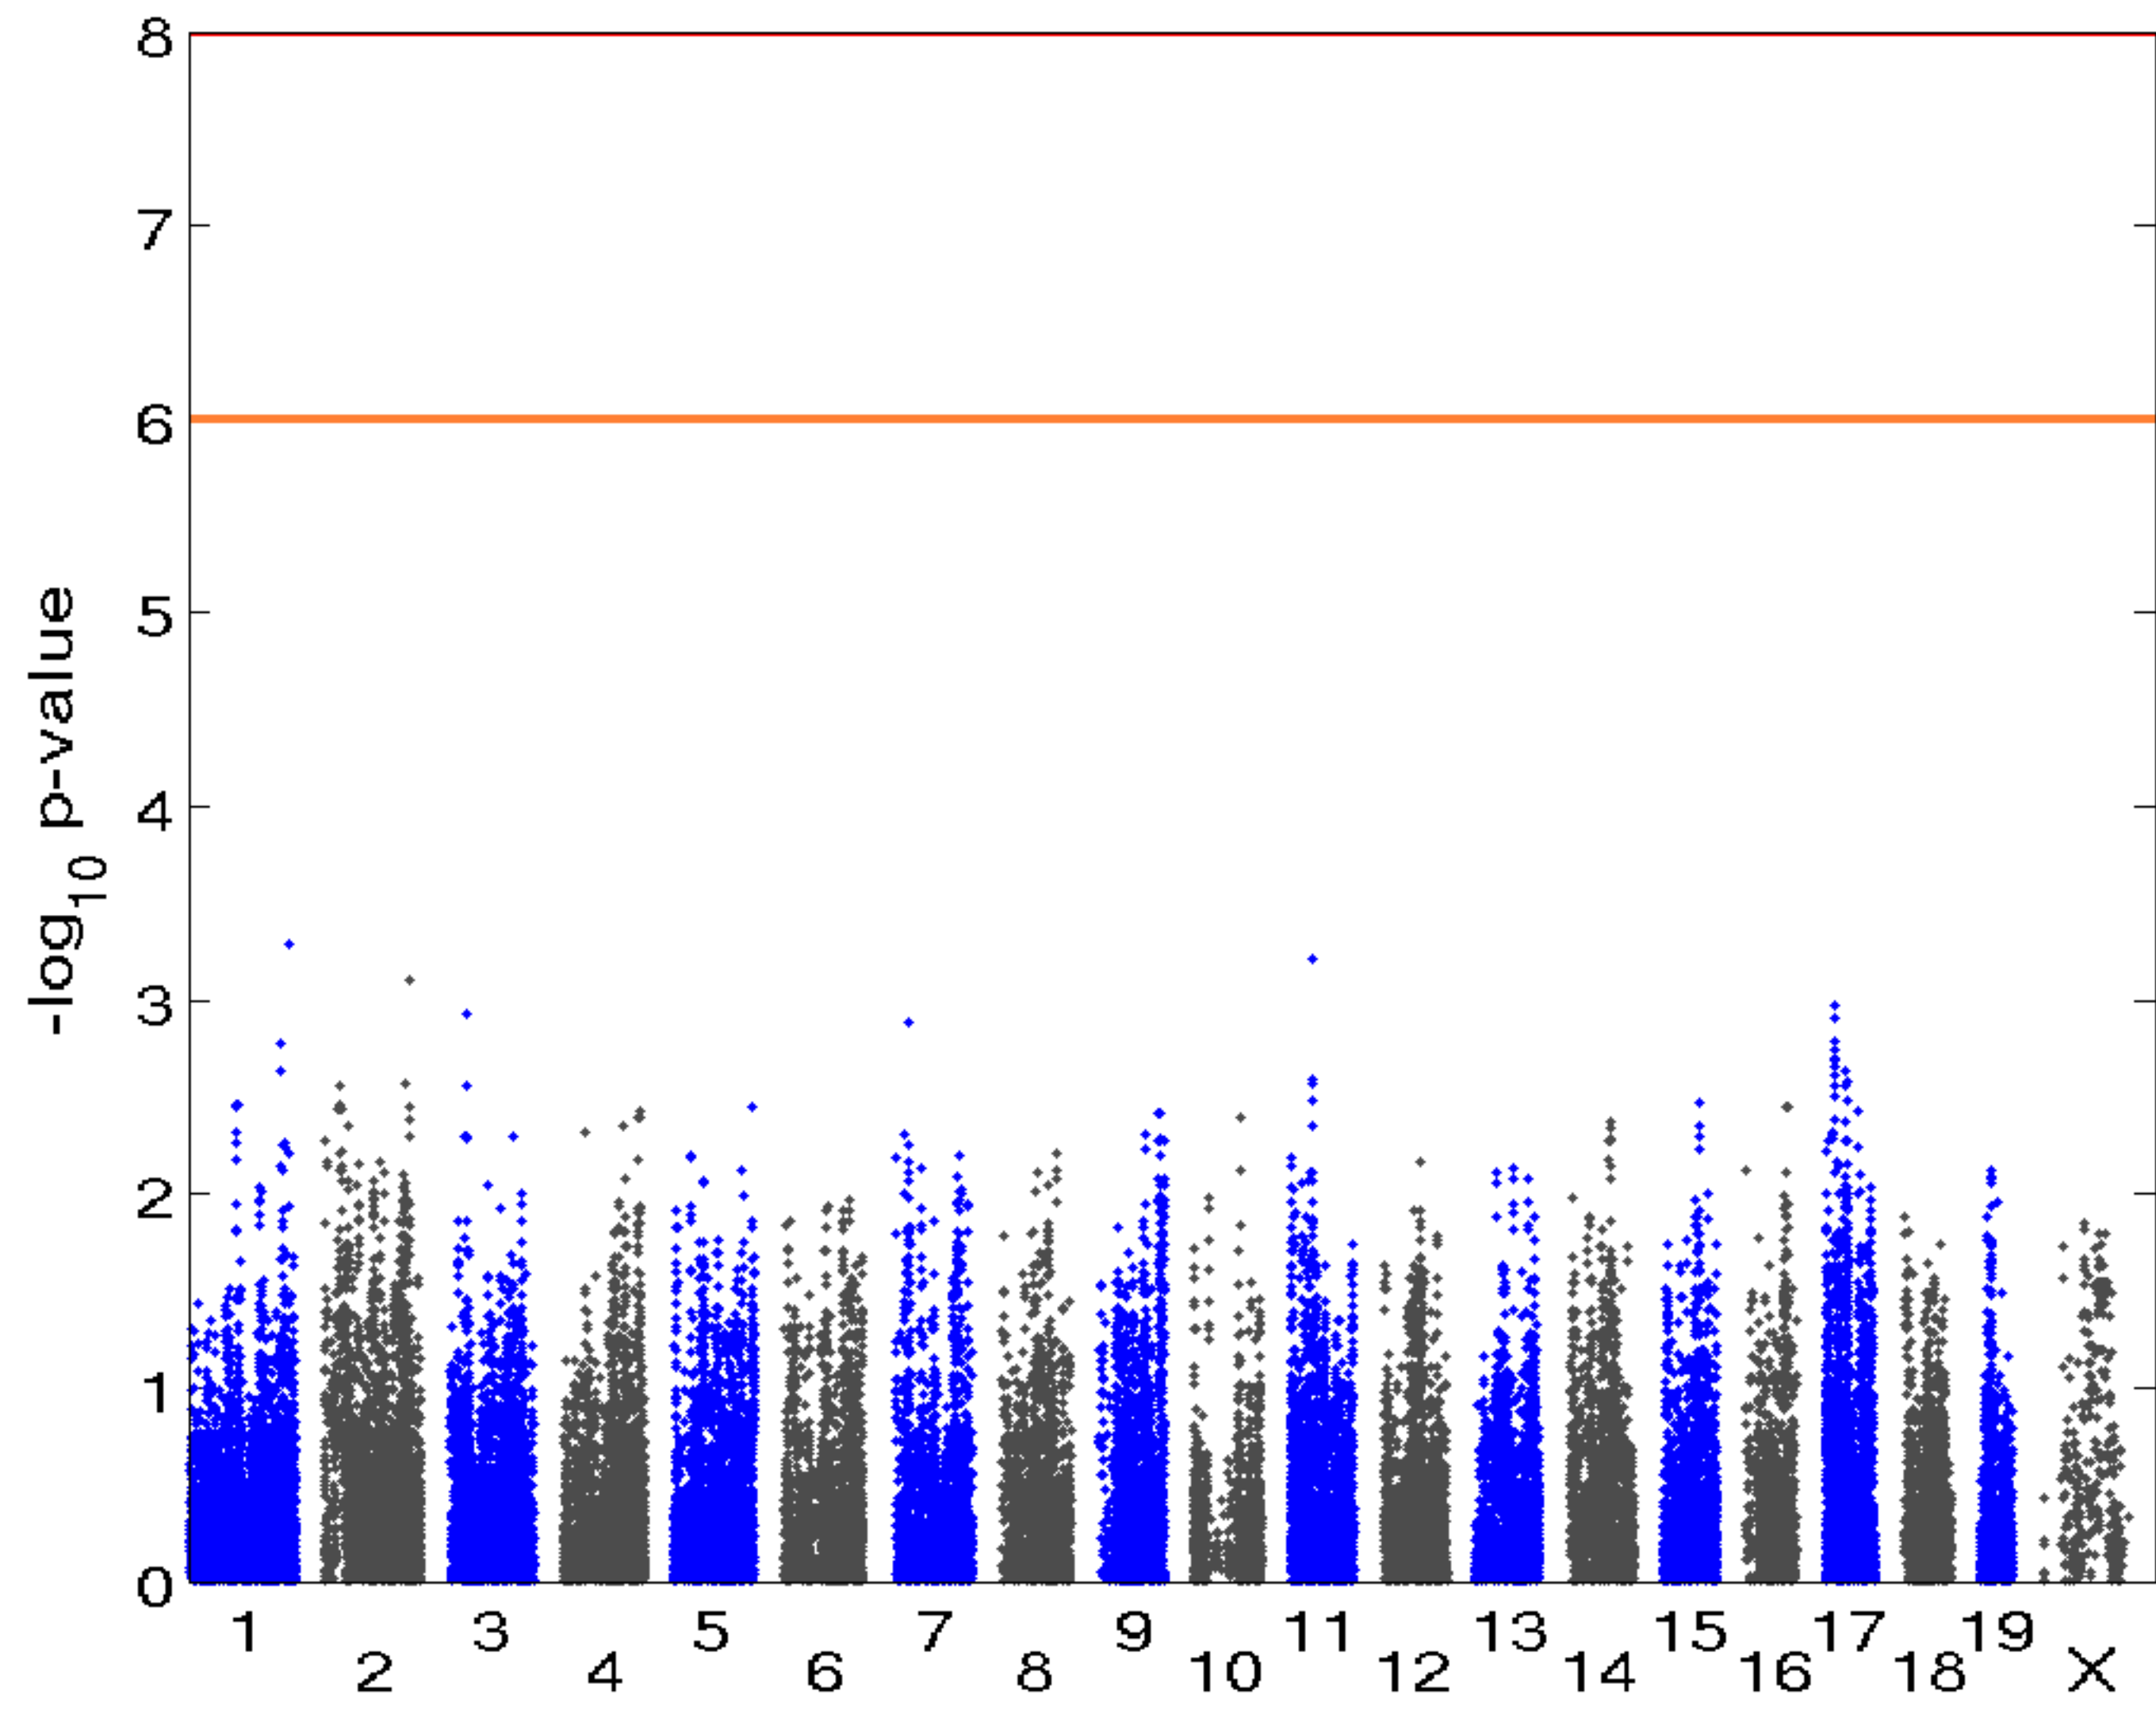

Qamp - ate vs ctr

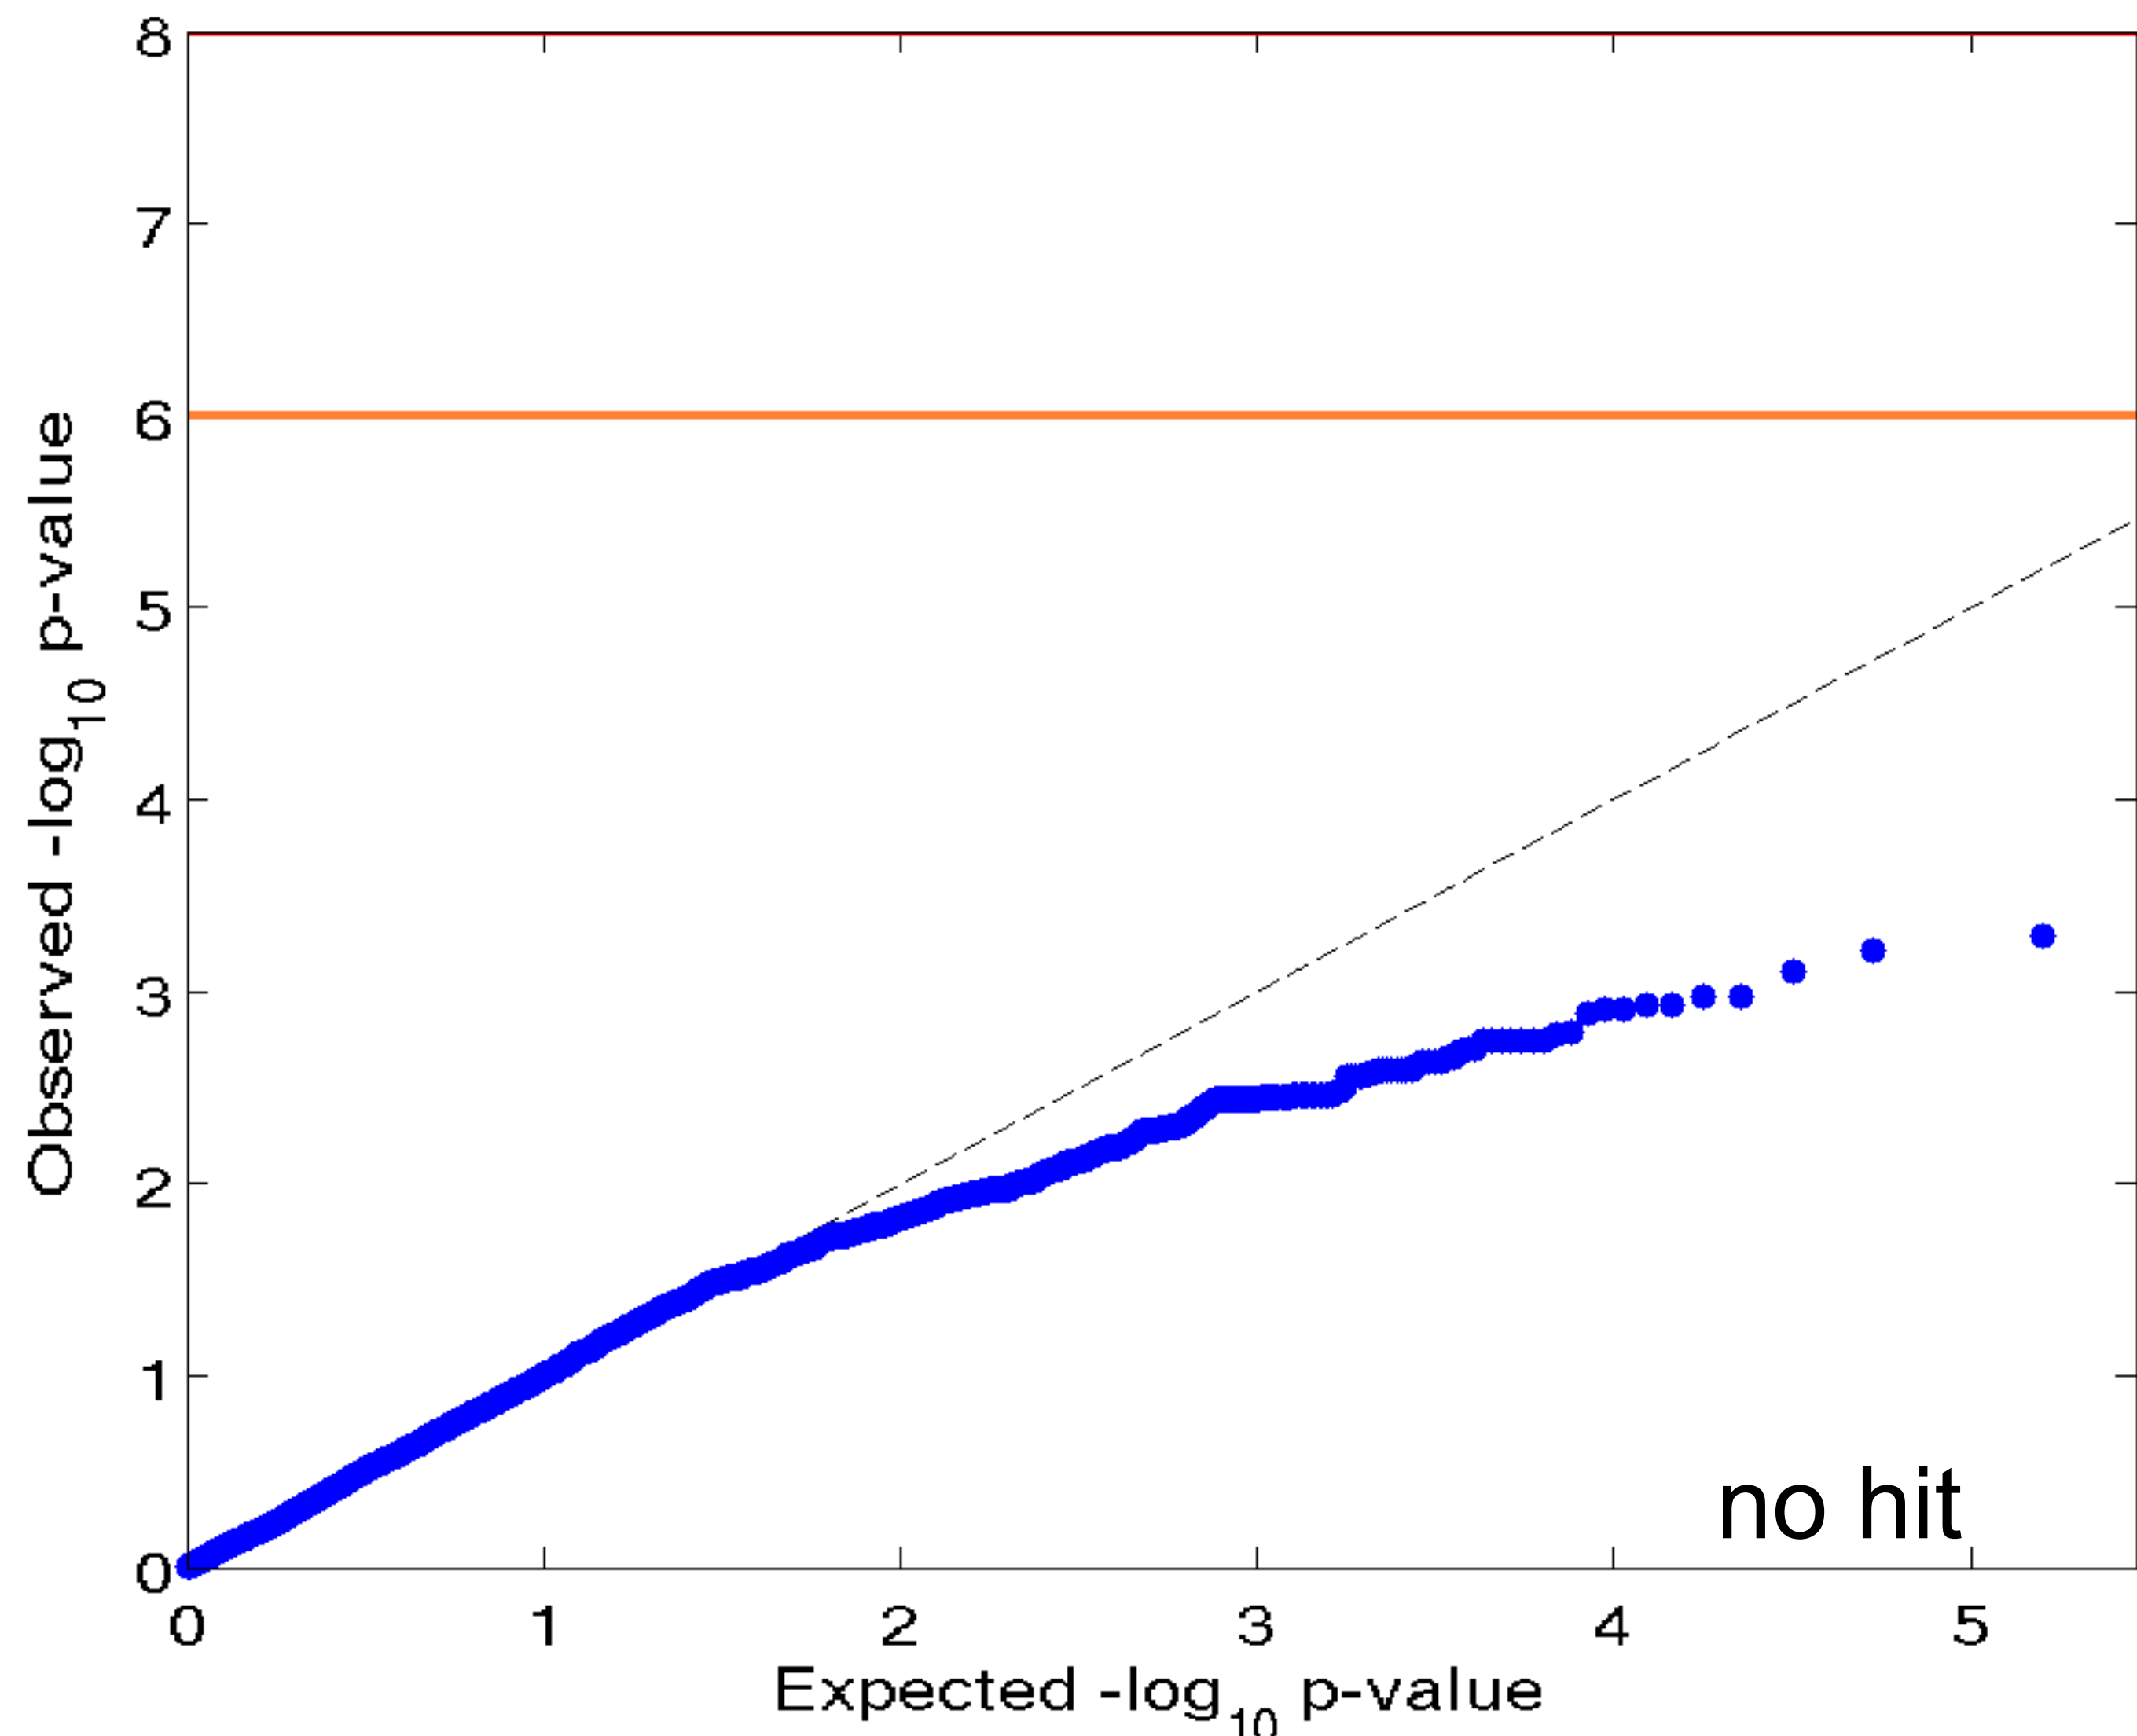



QRSarea - ate vs ctr

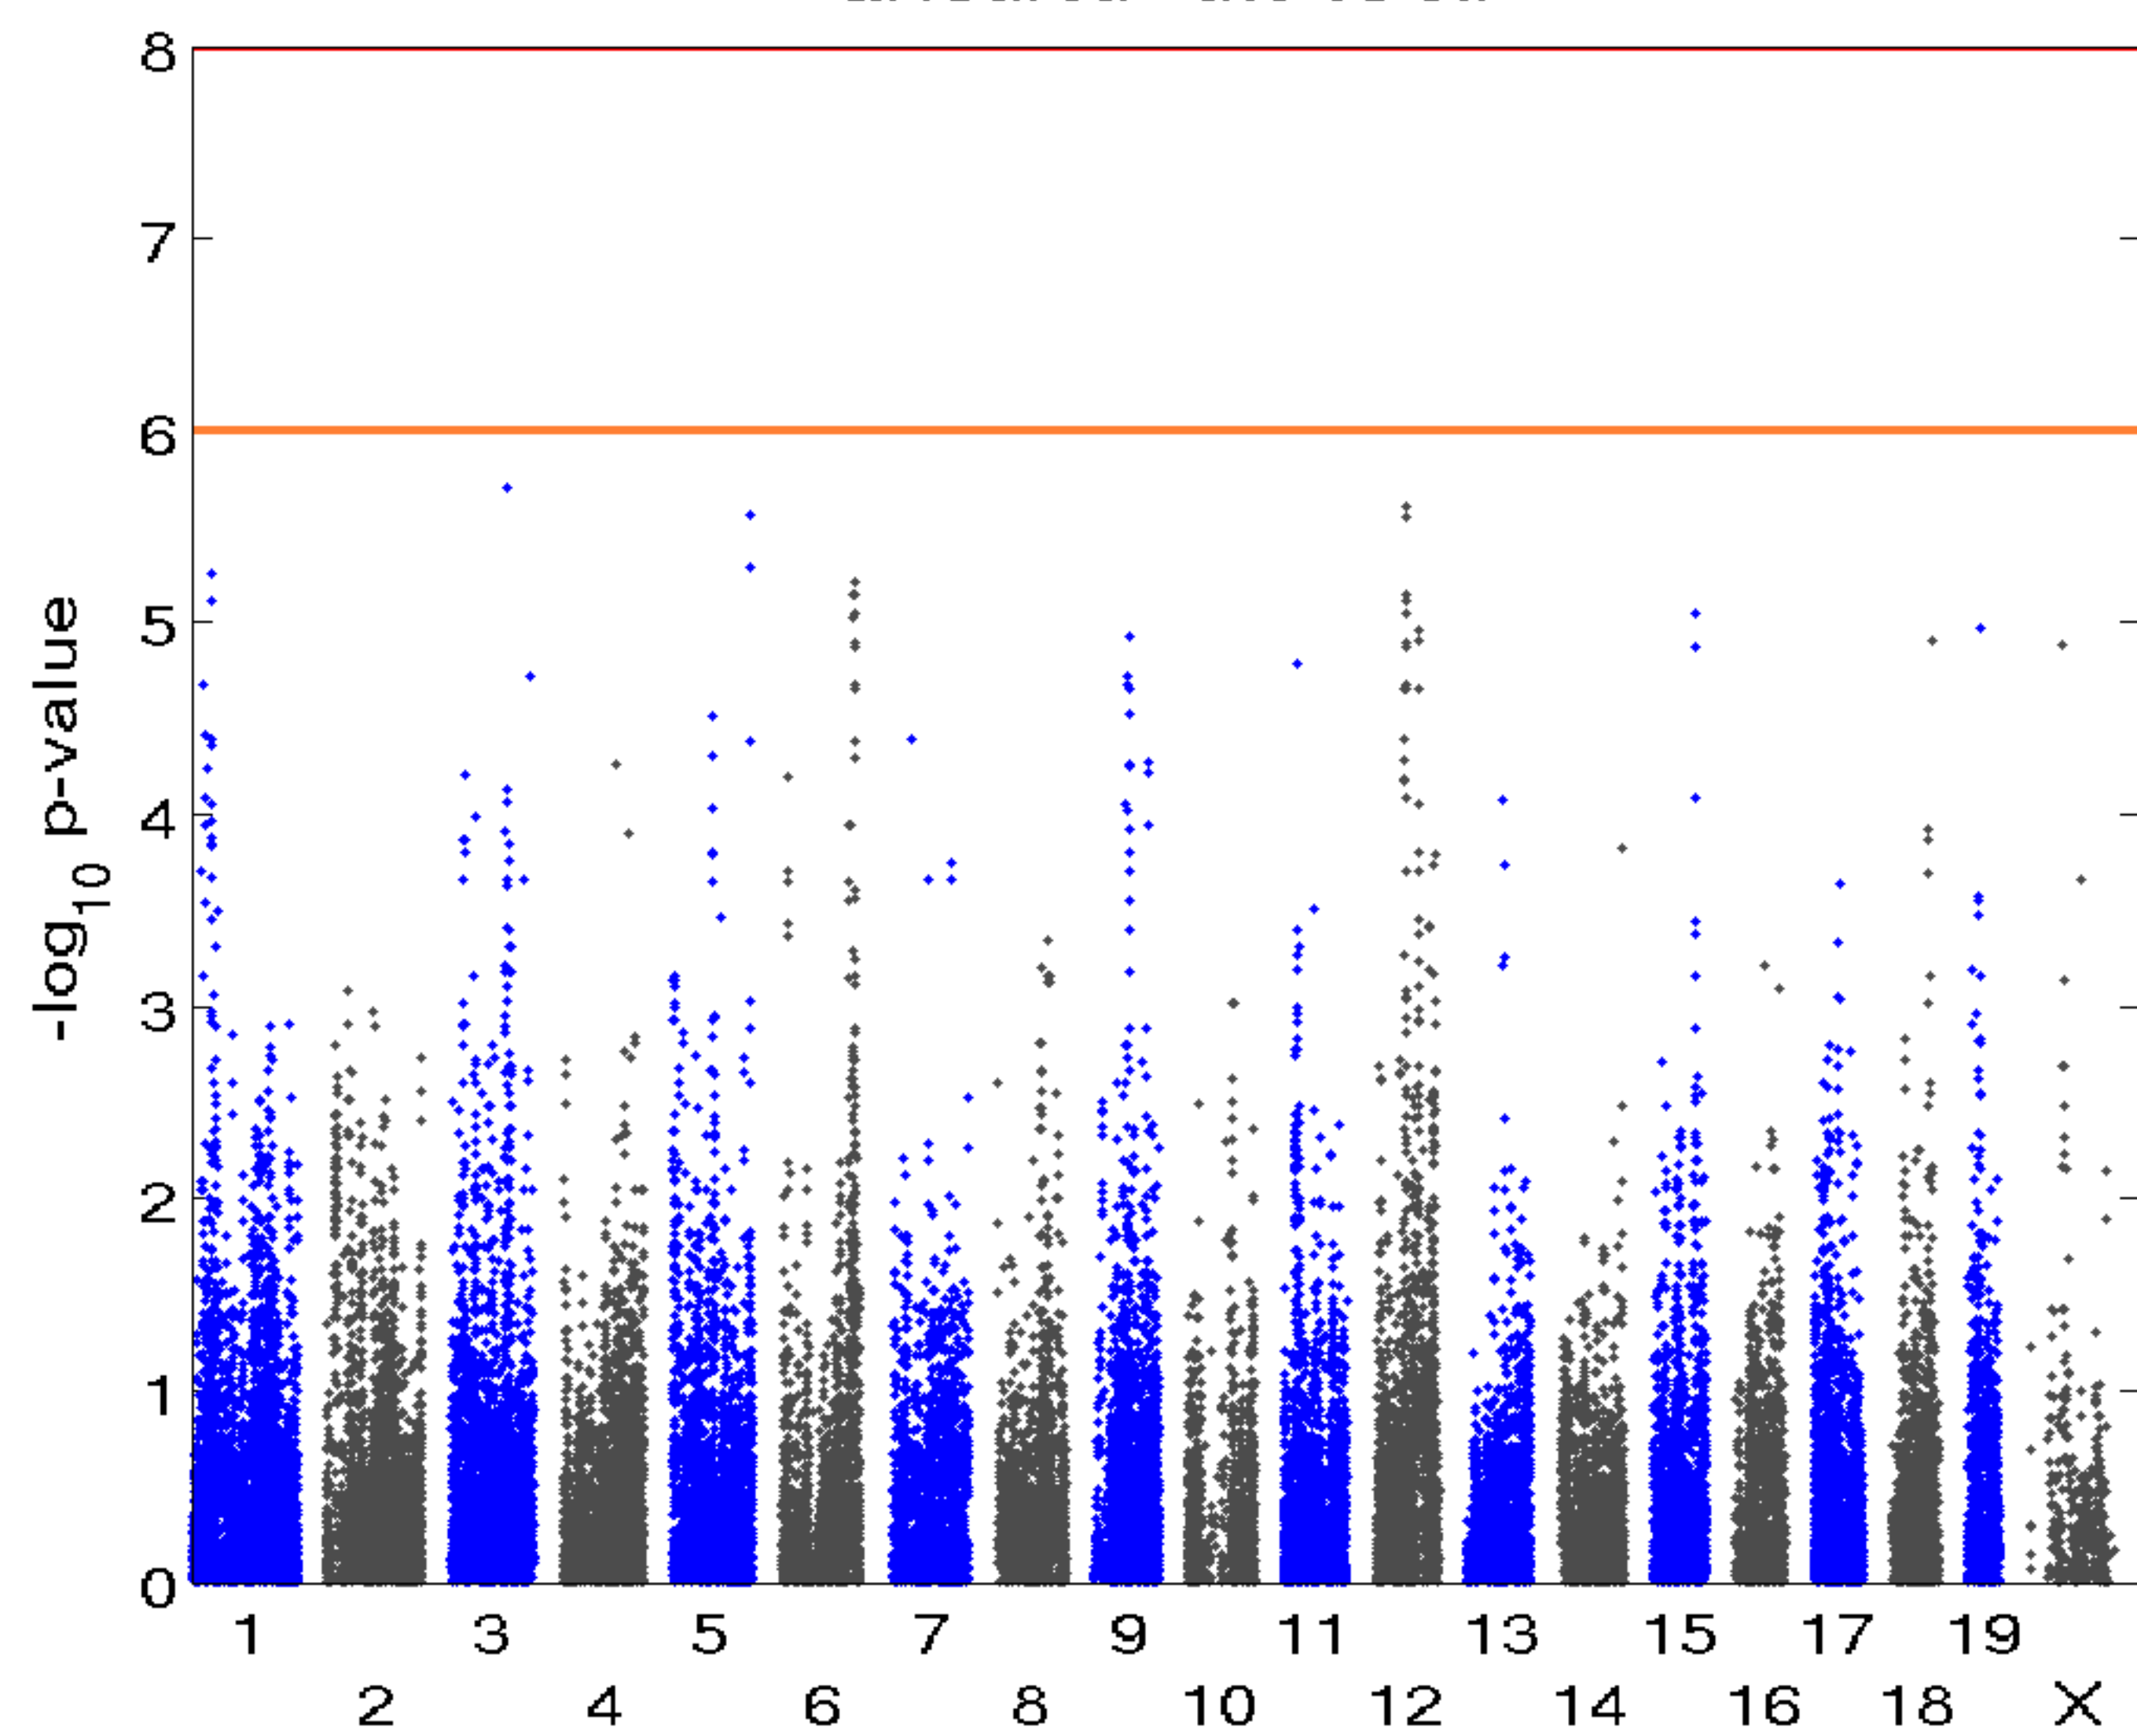

QRSarea - ate vs ctr

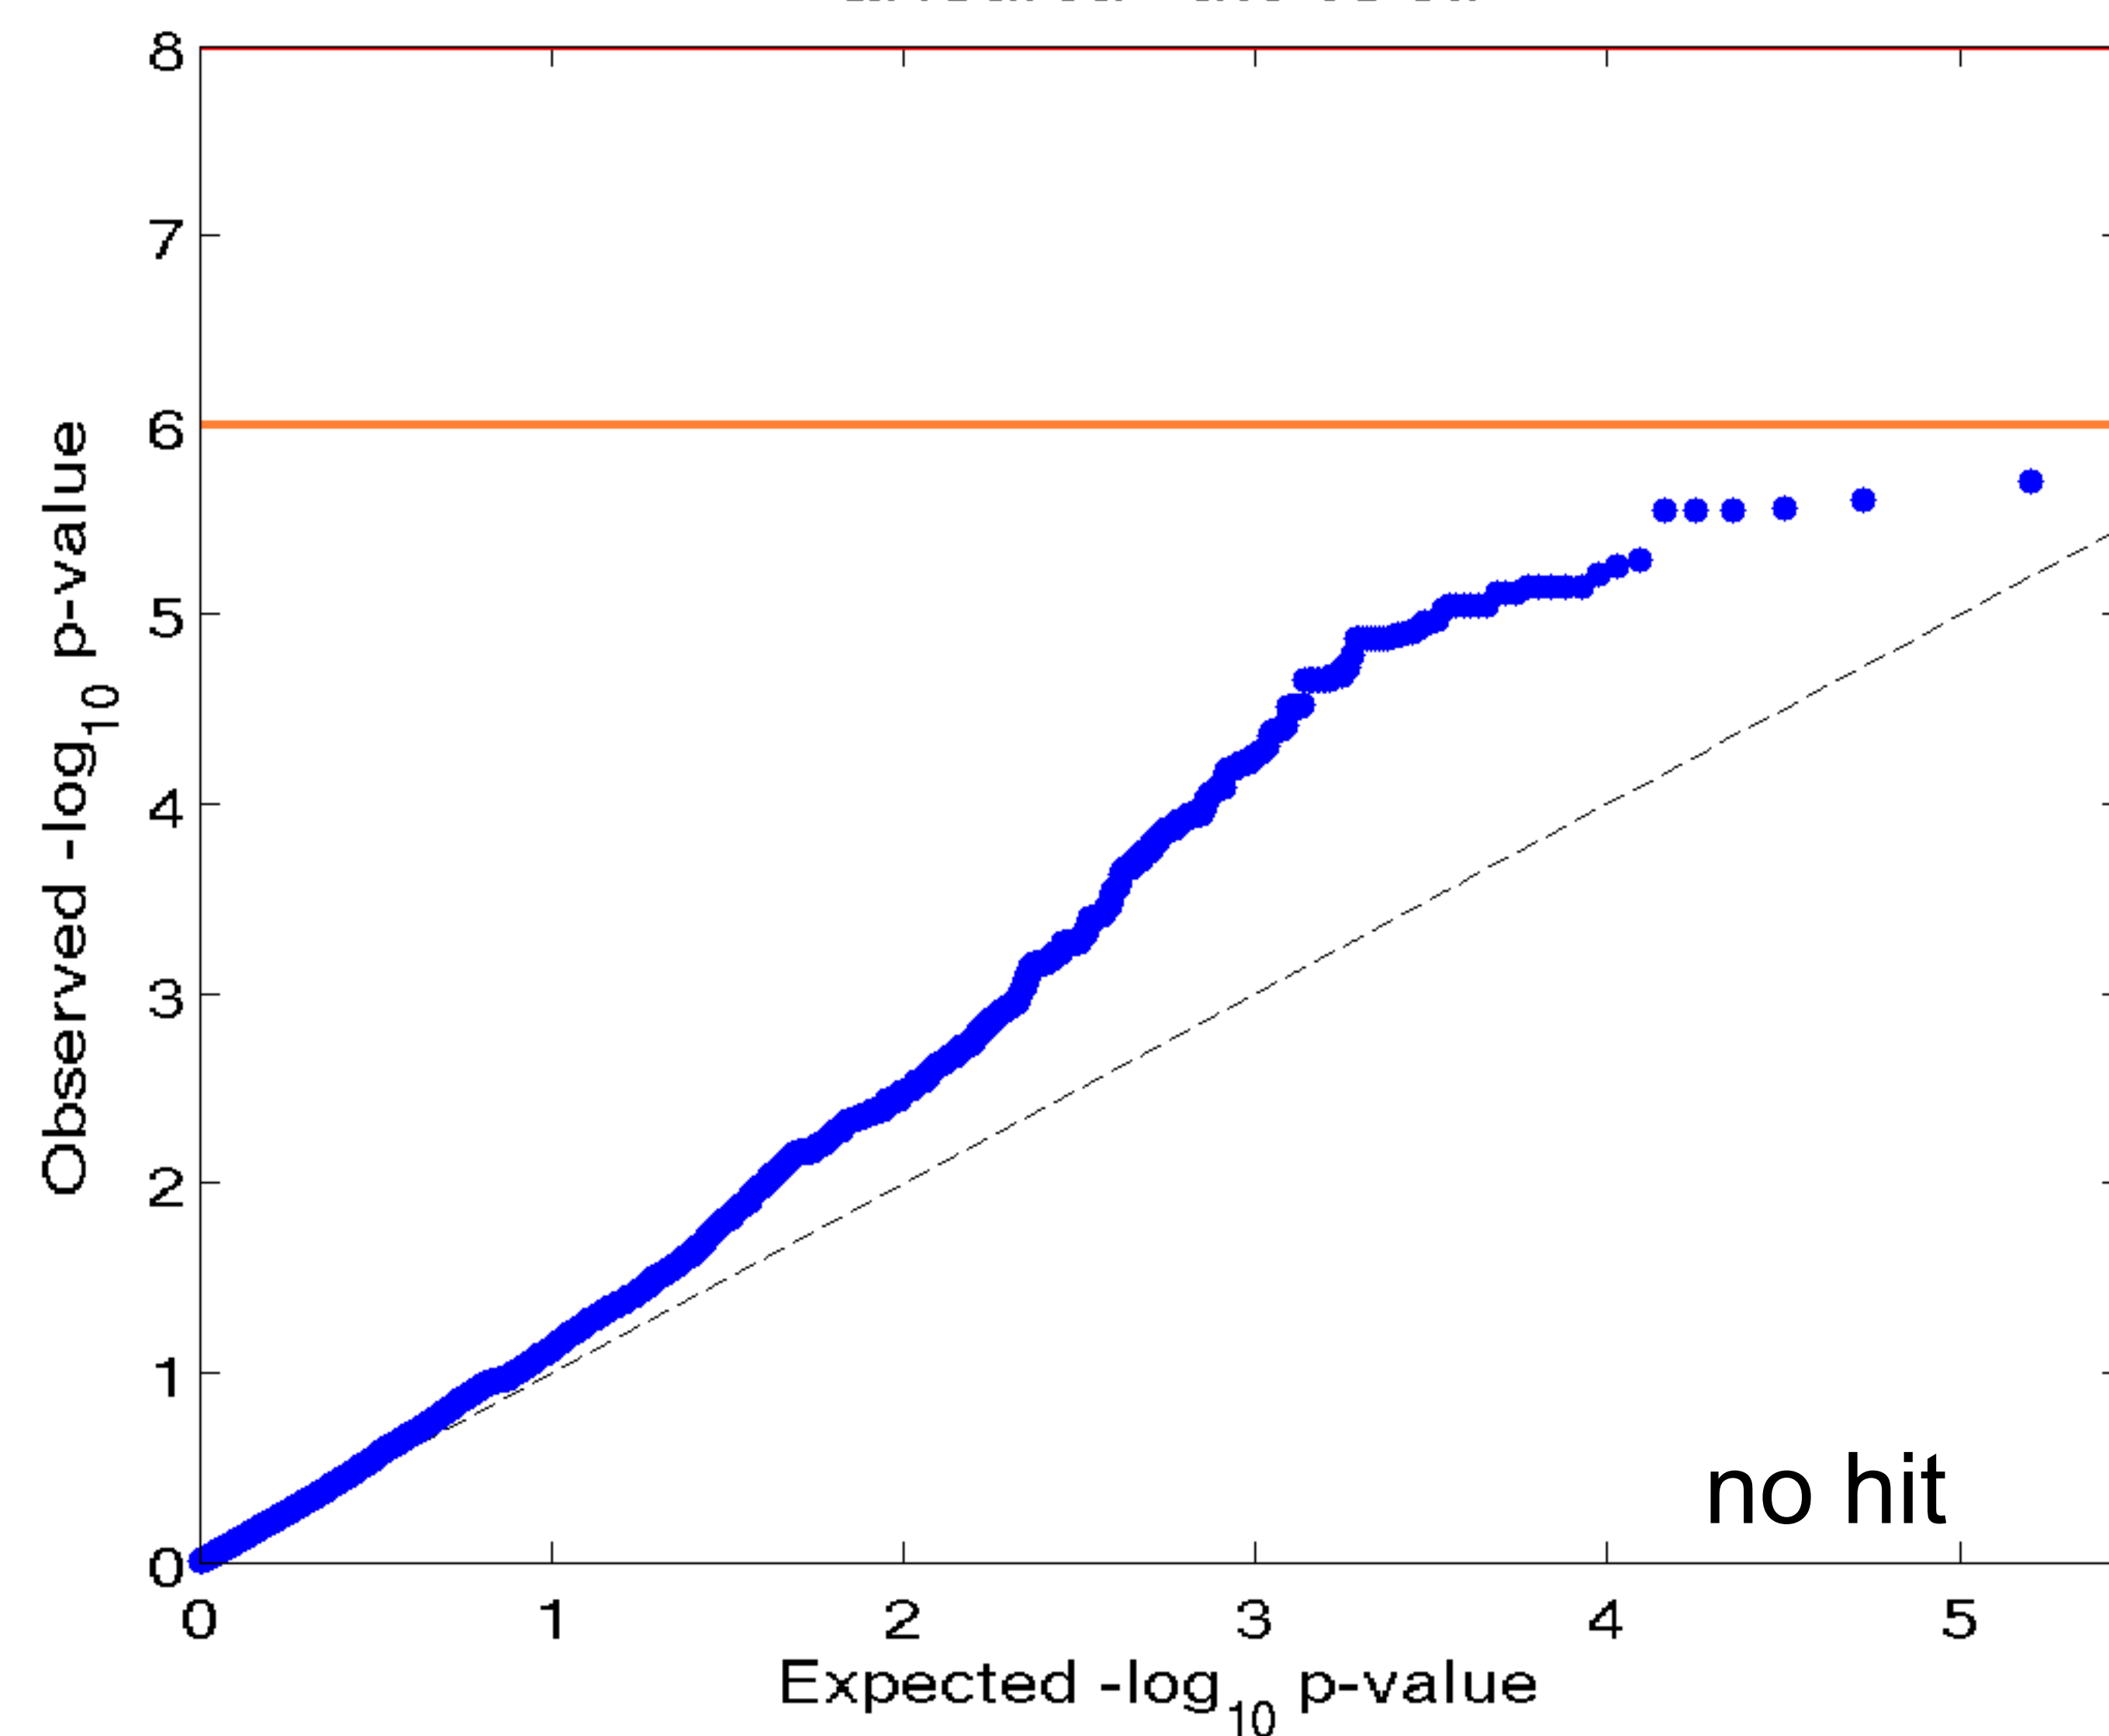

QRS - ate vs ctr

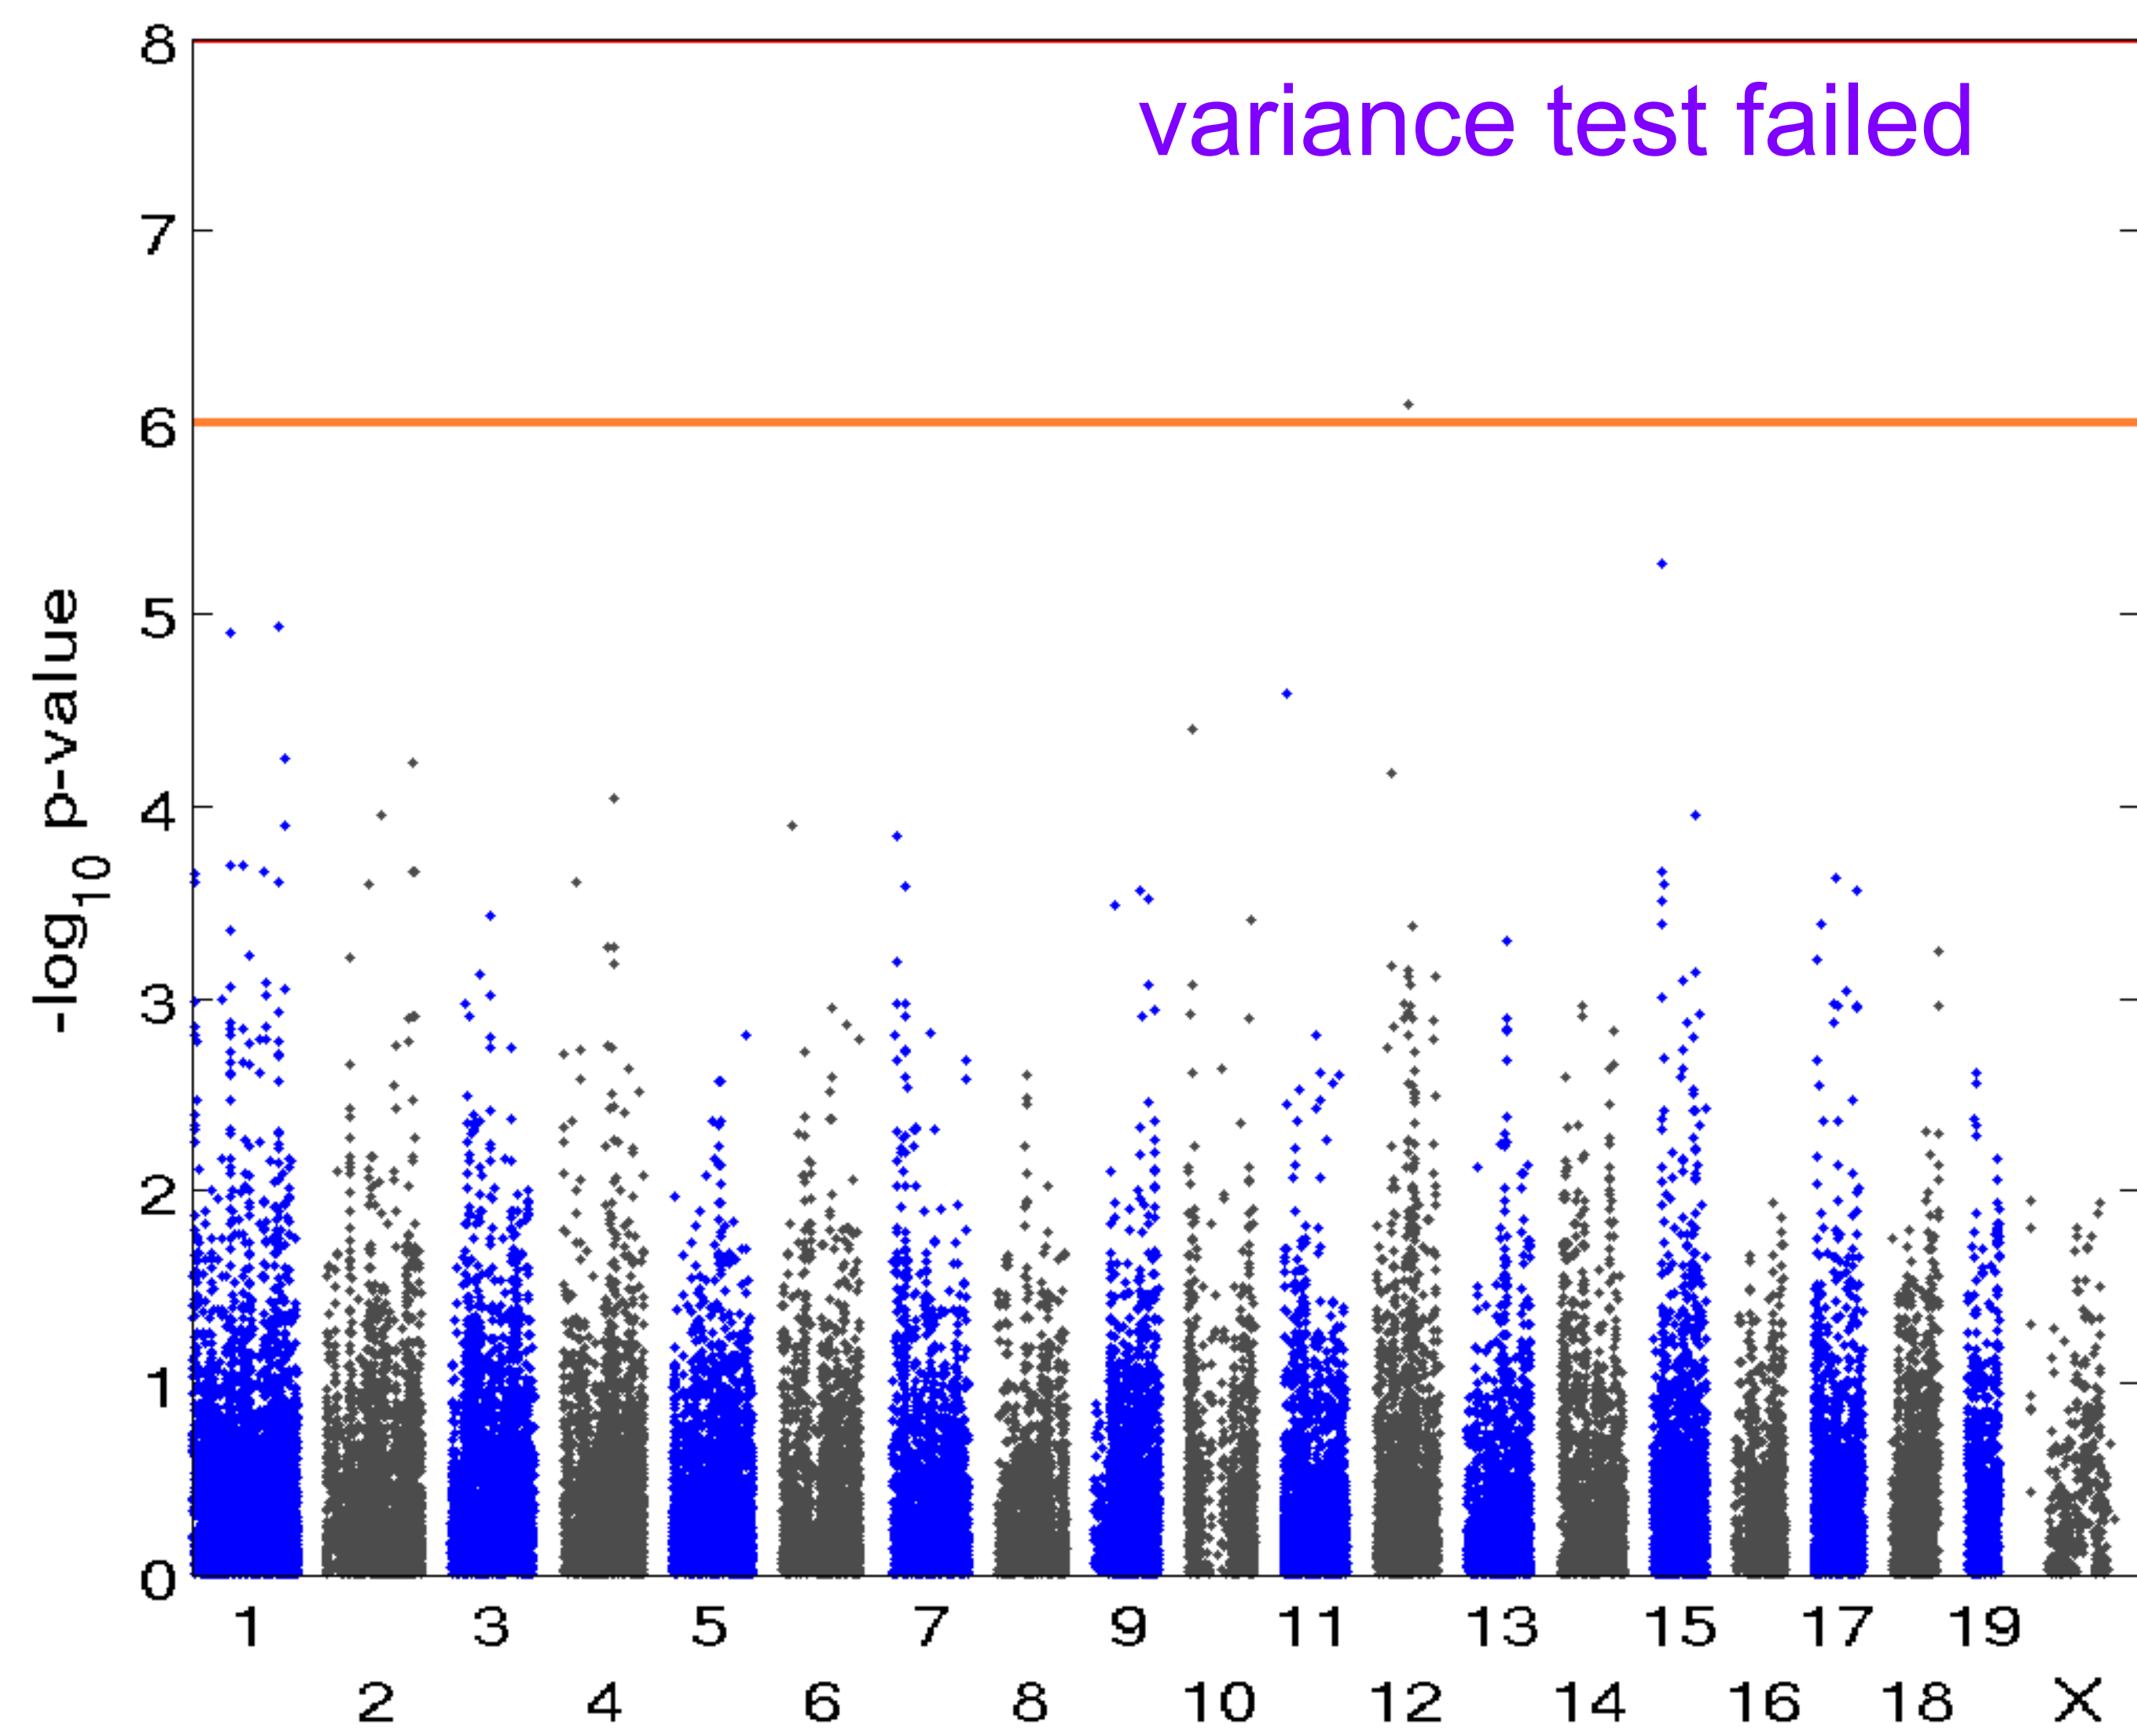

QRS - ate vs ctr

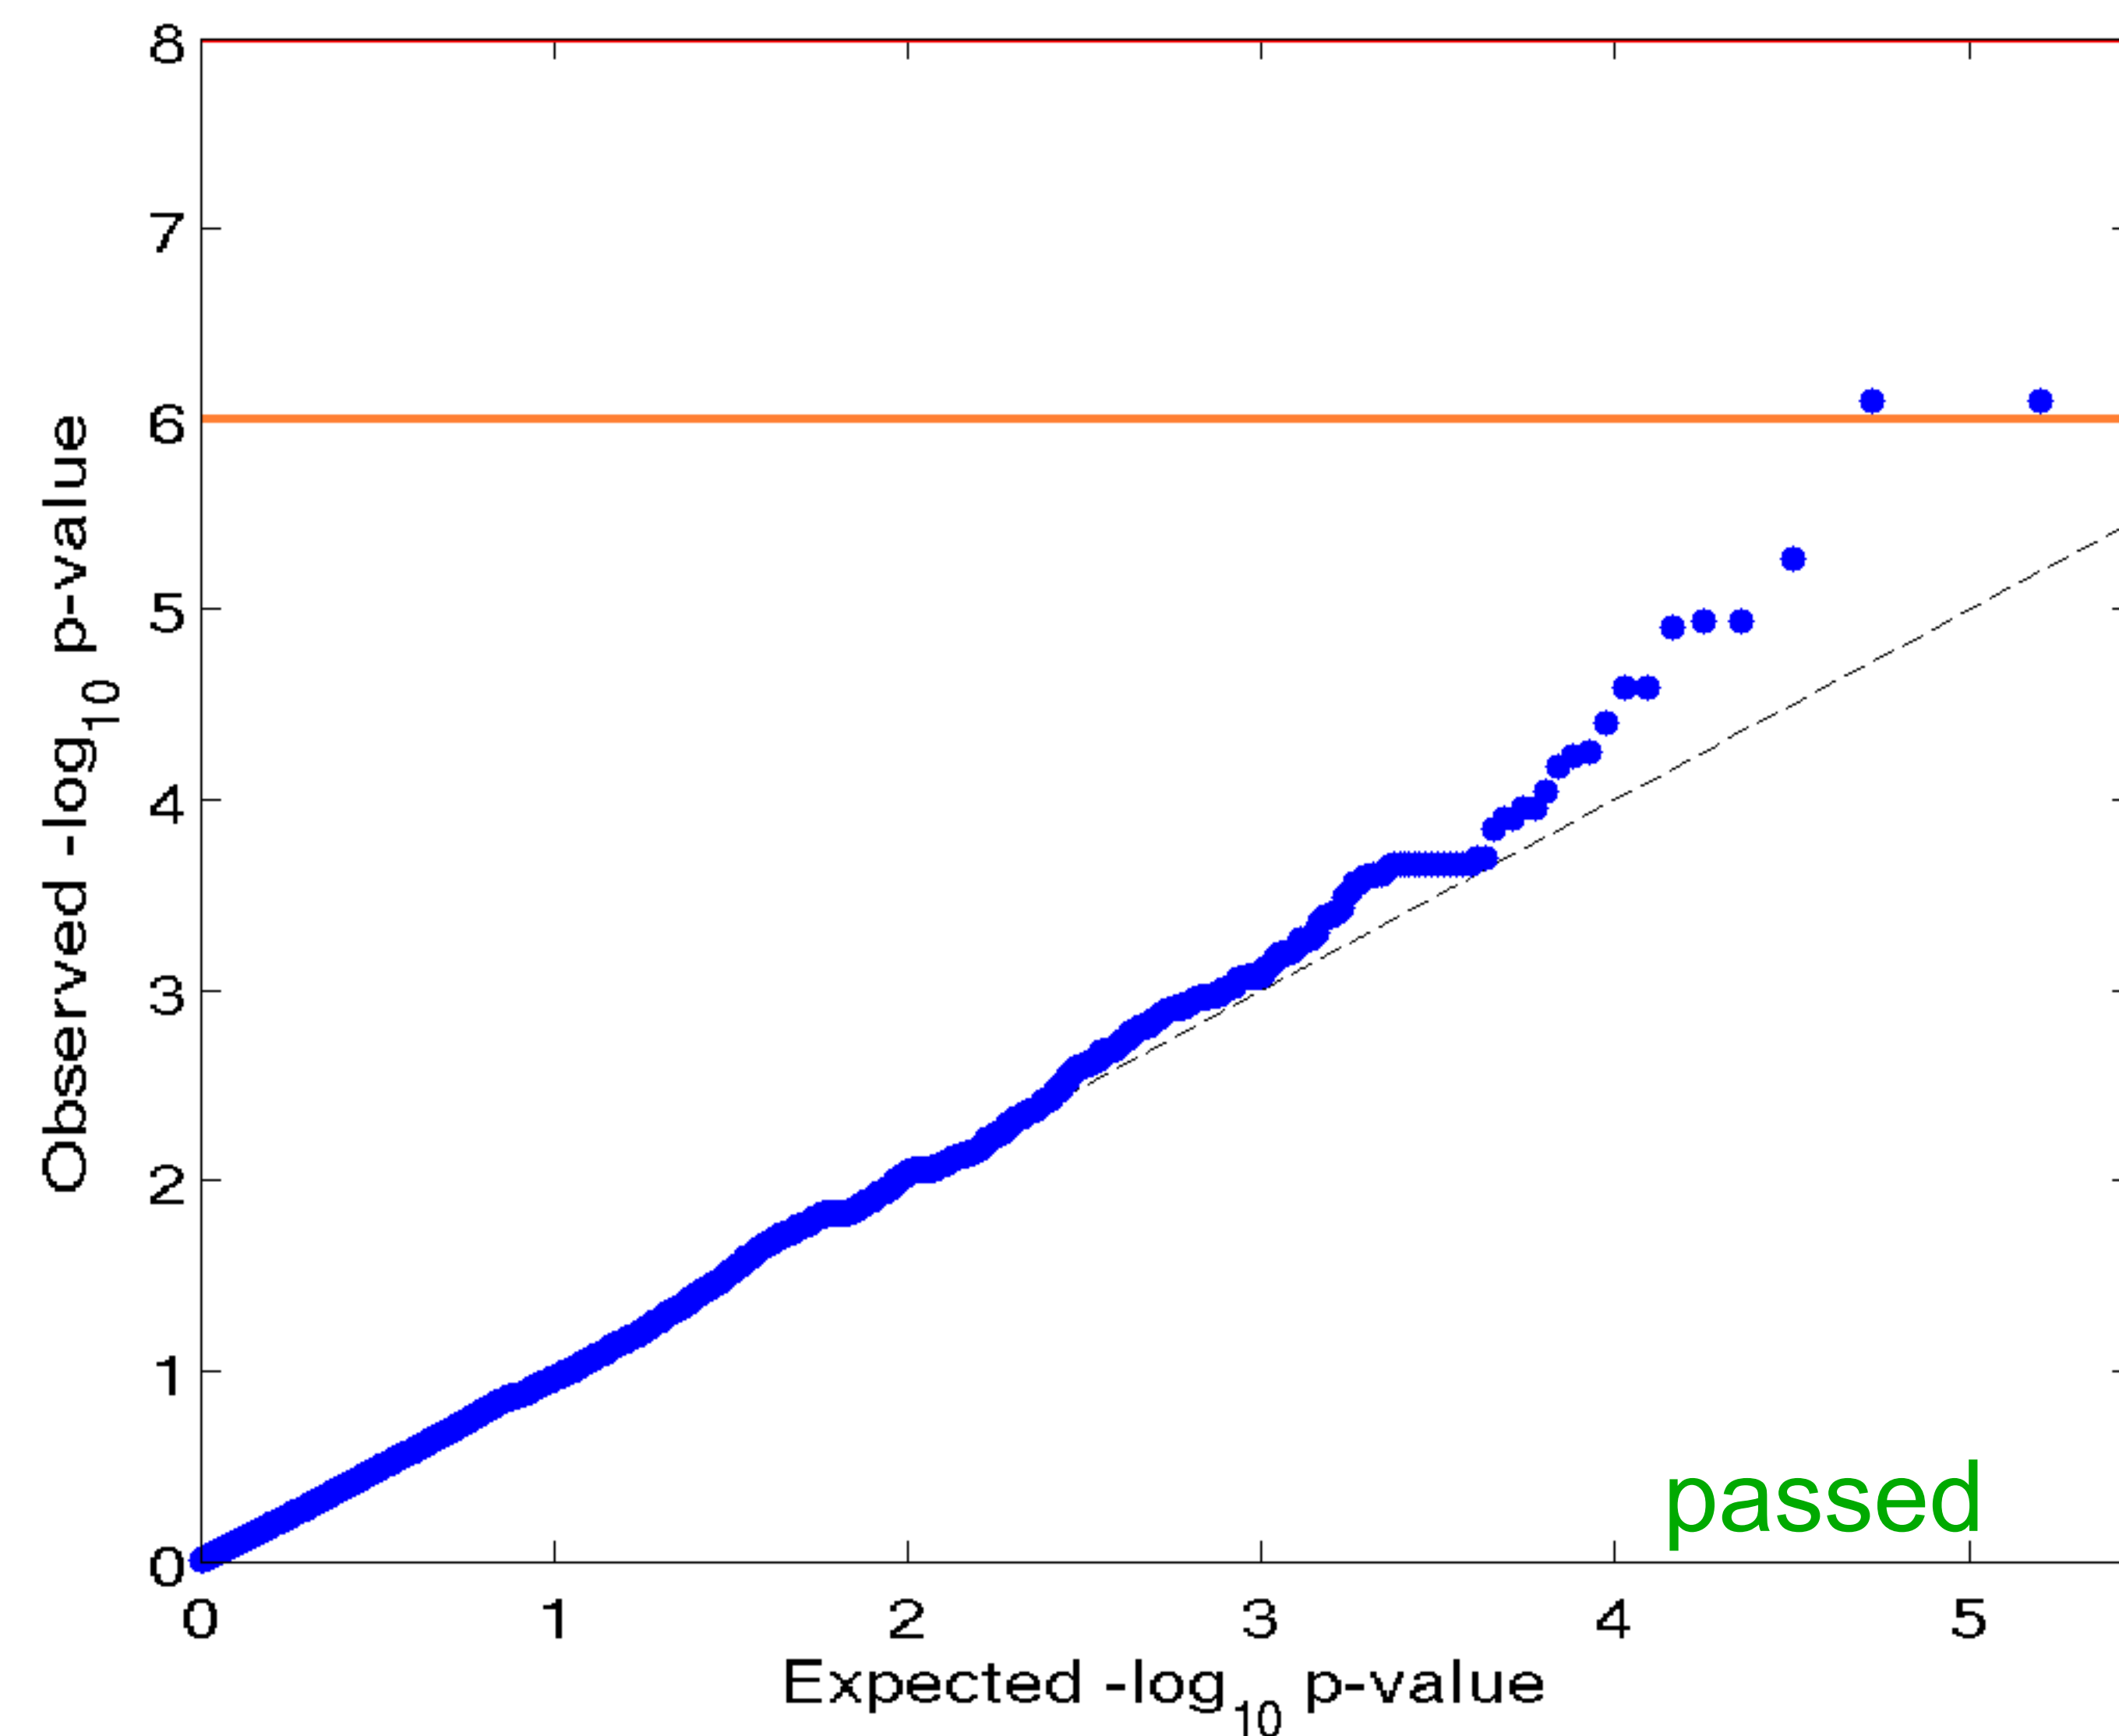

QTc - ate vs ctr

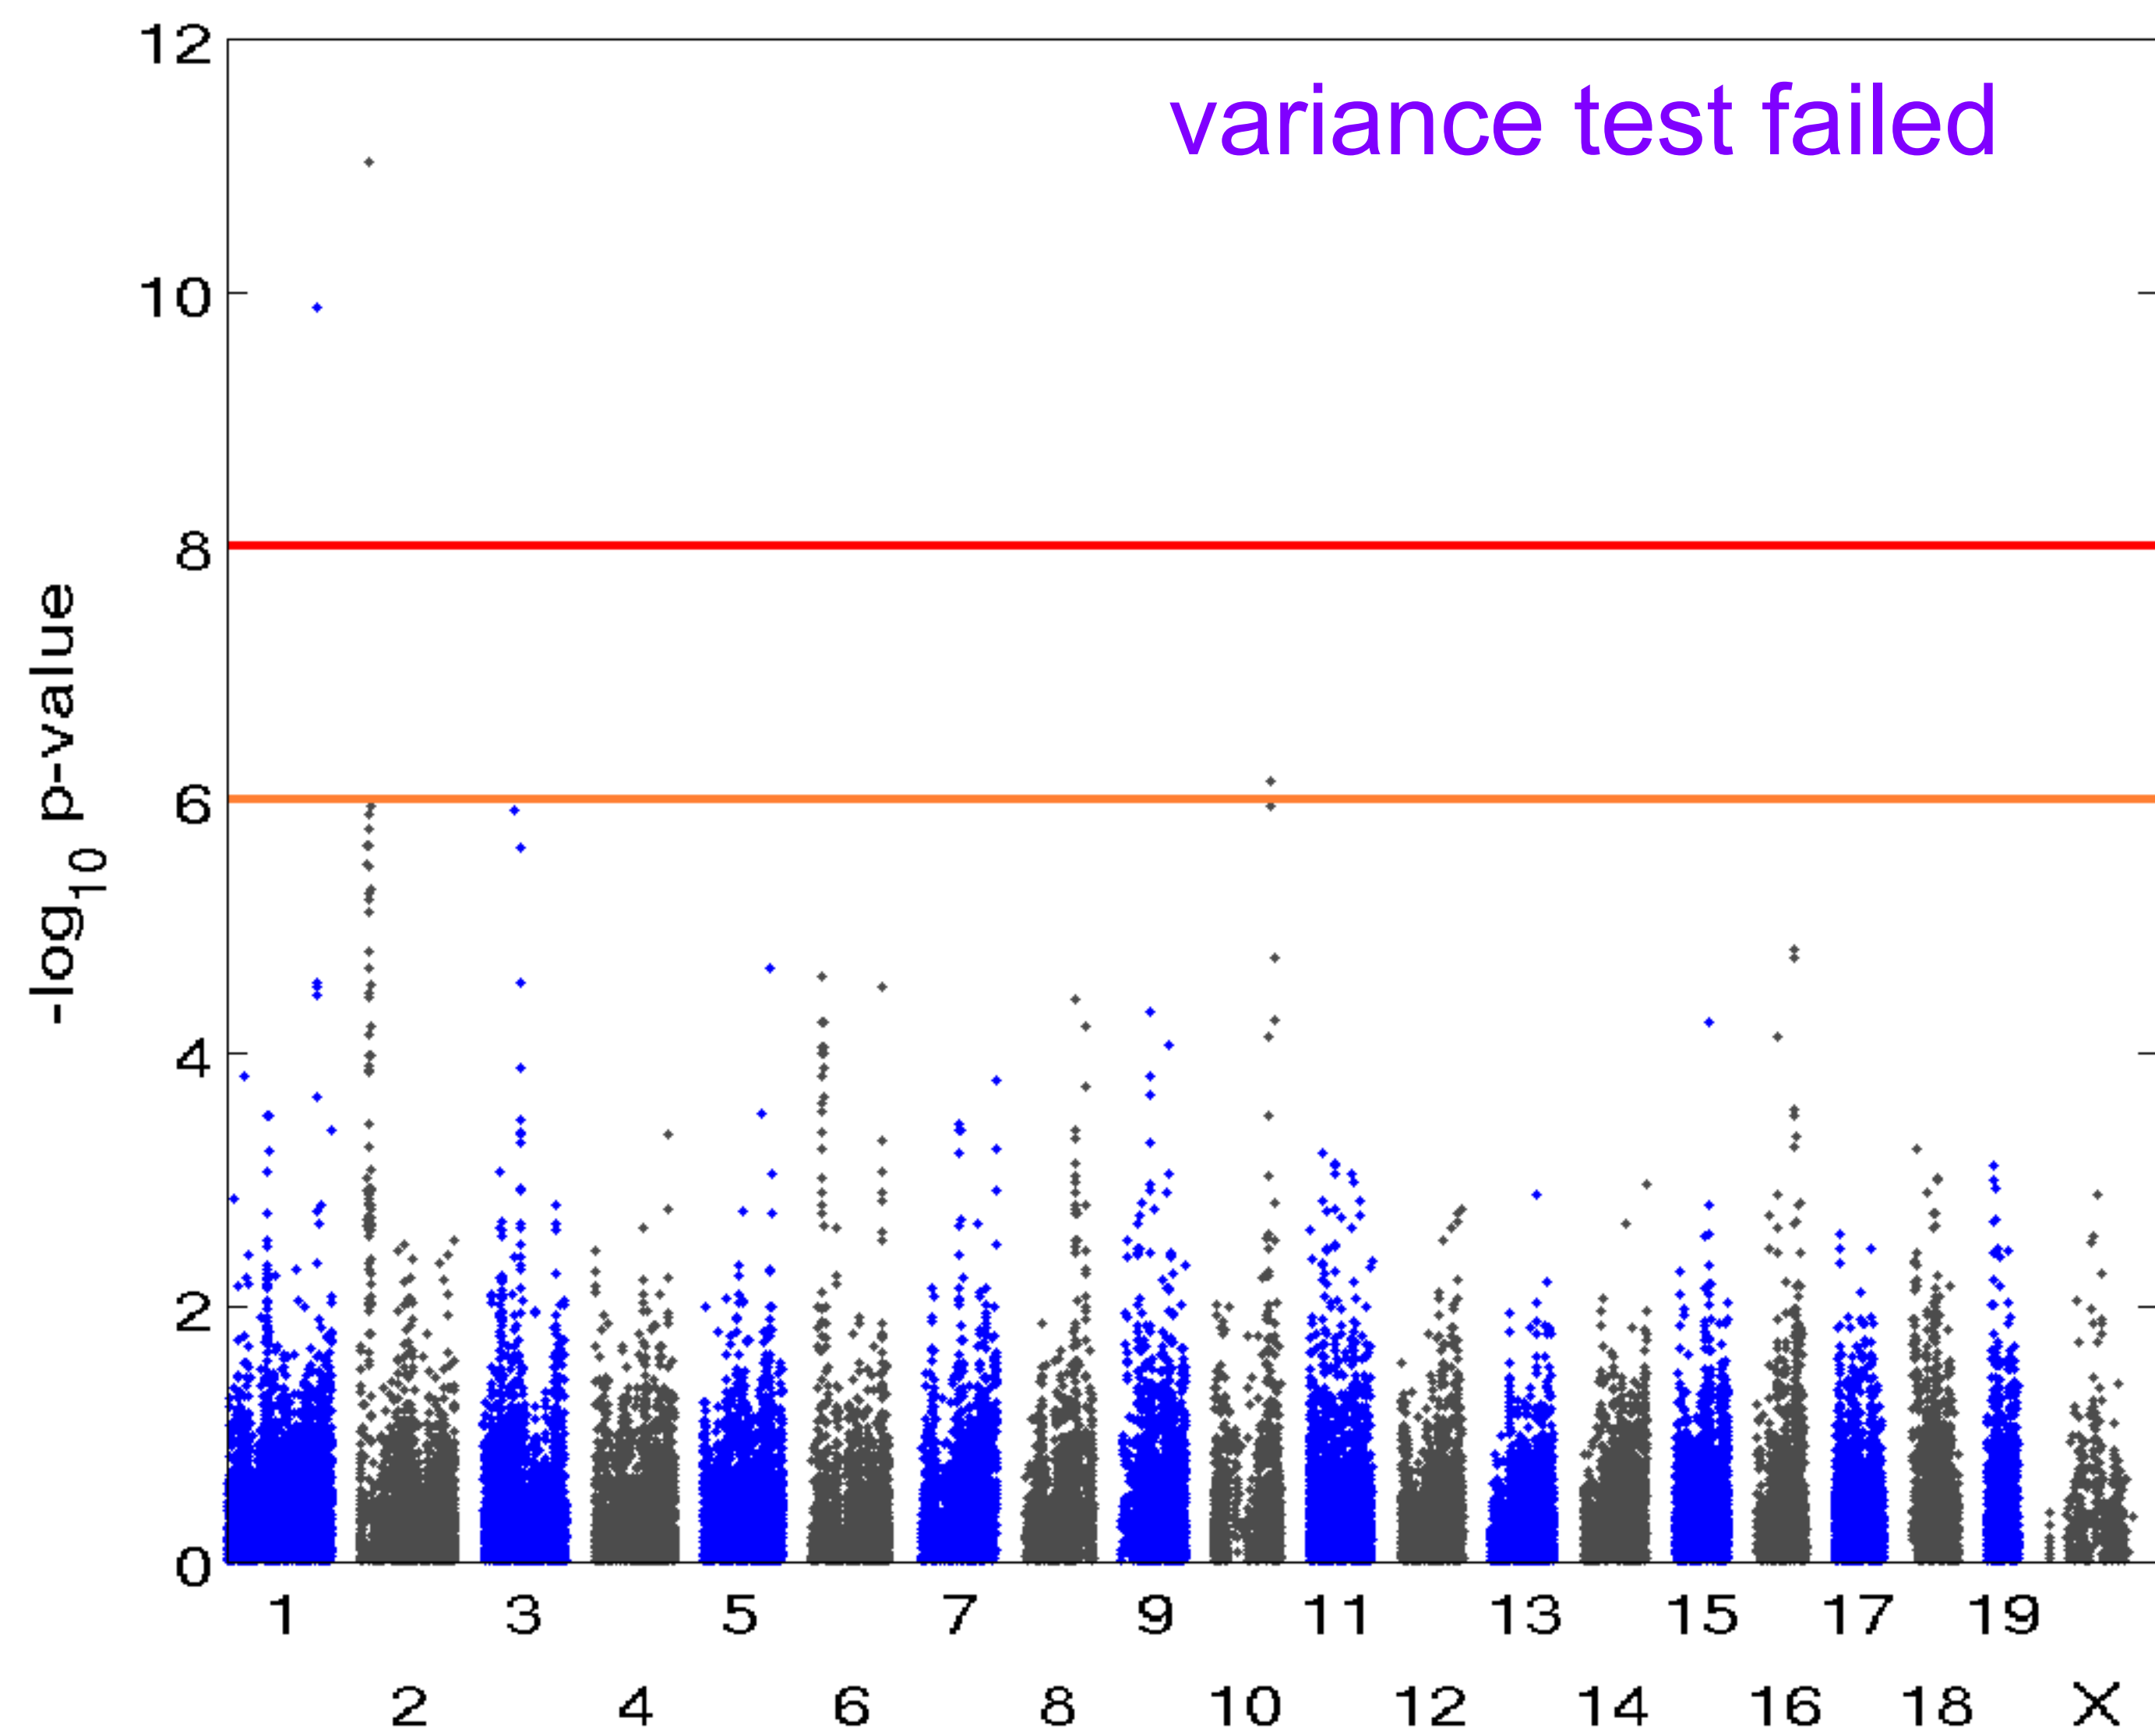

QTc - ate vs ctr

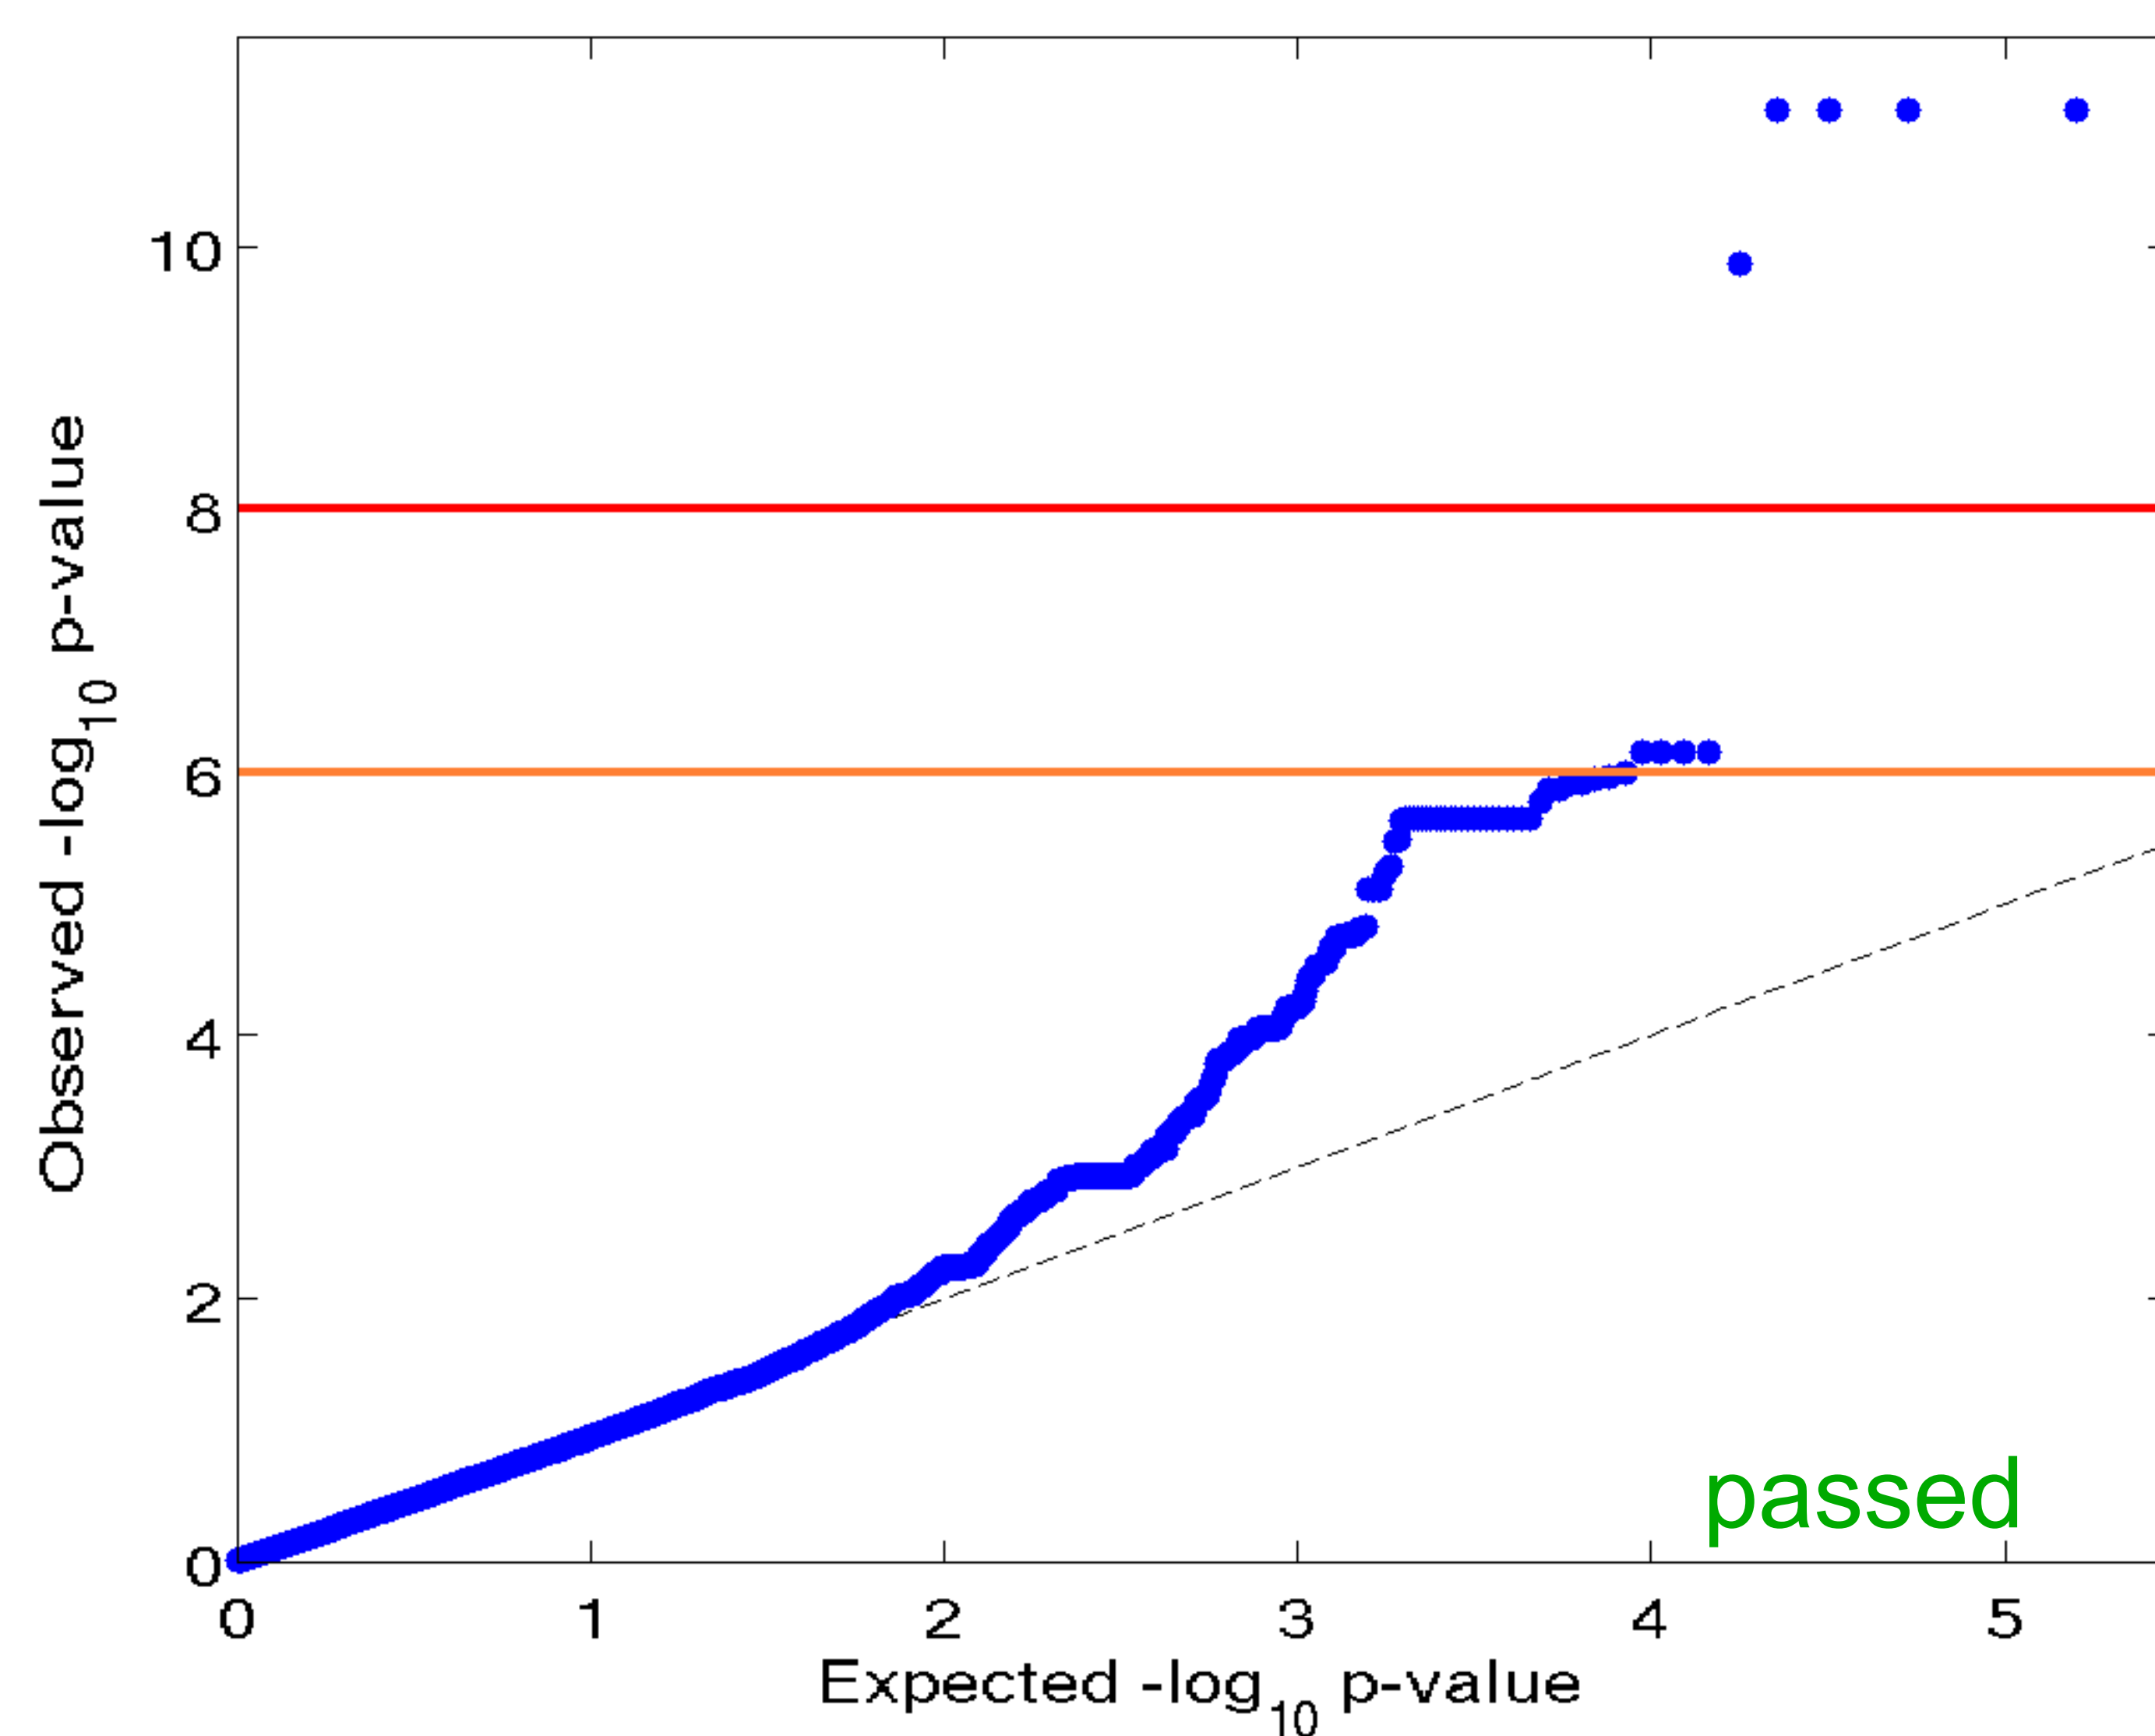

QT - ate vs ctr

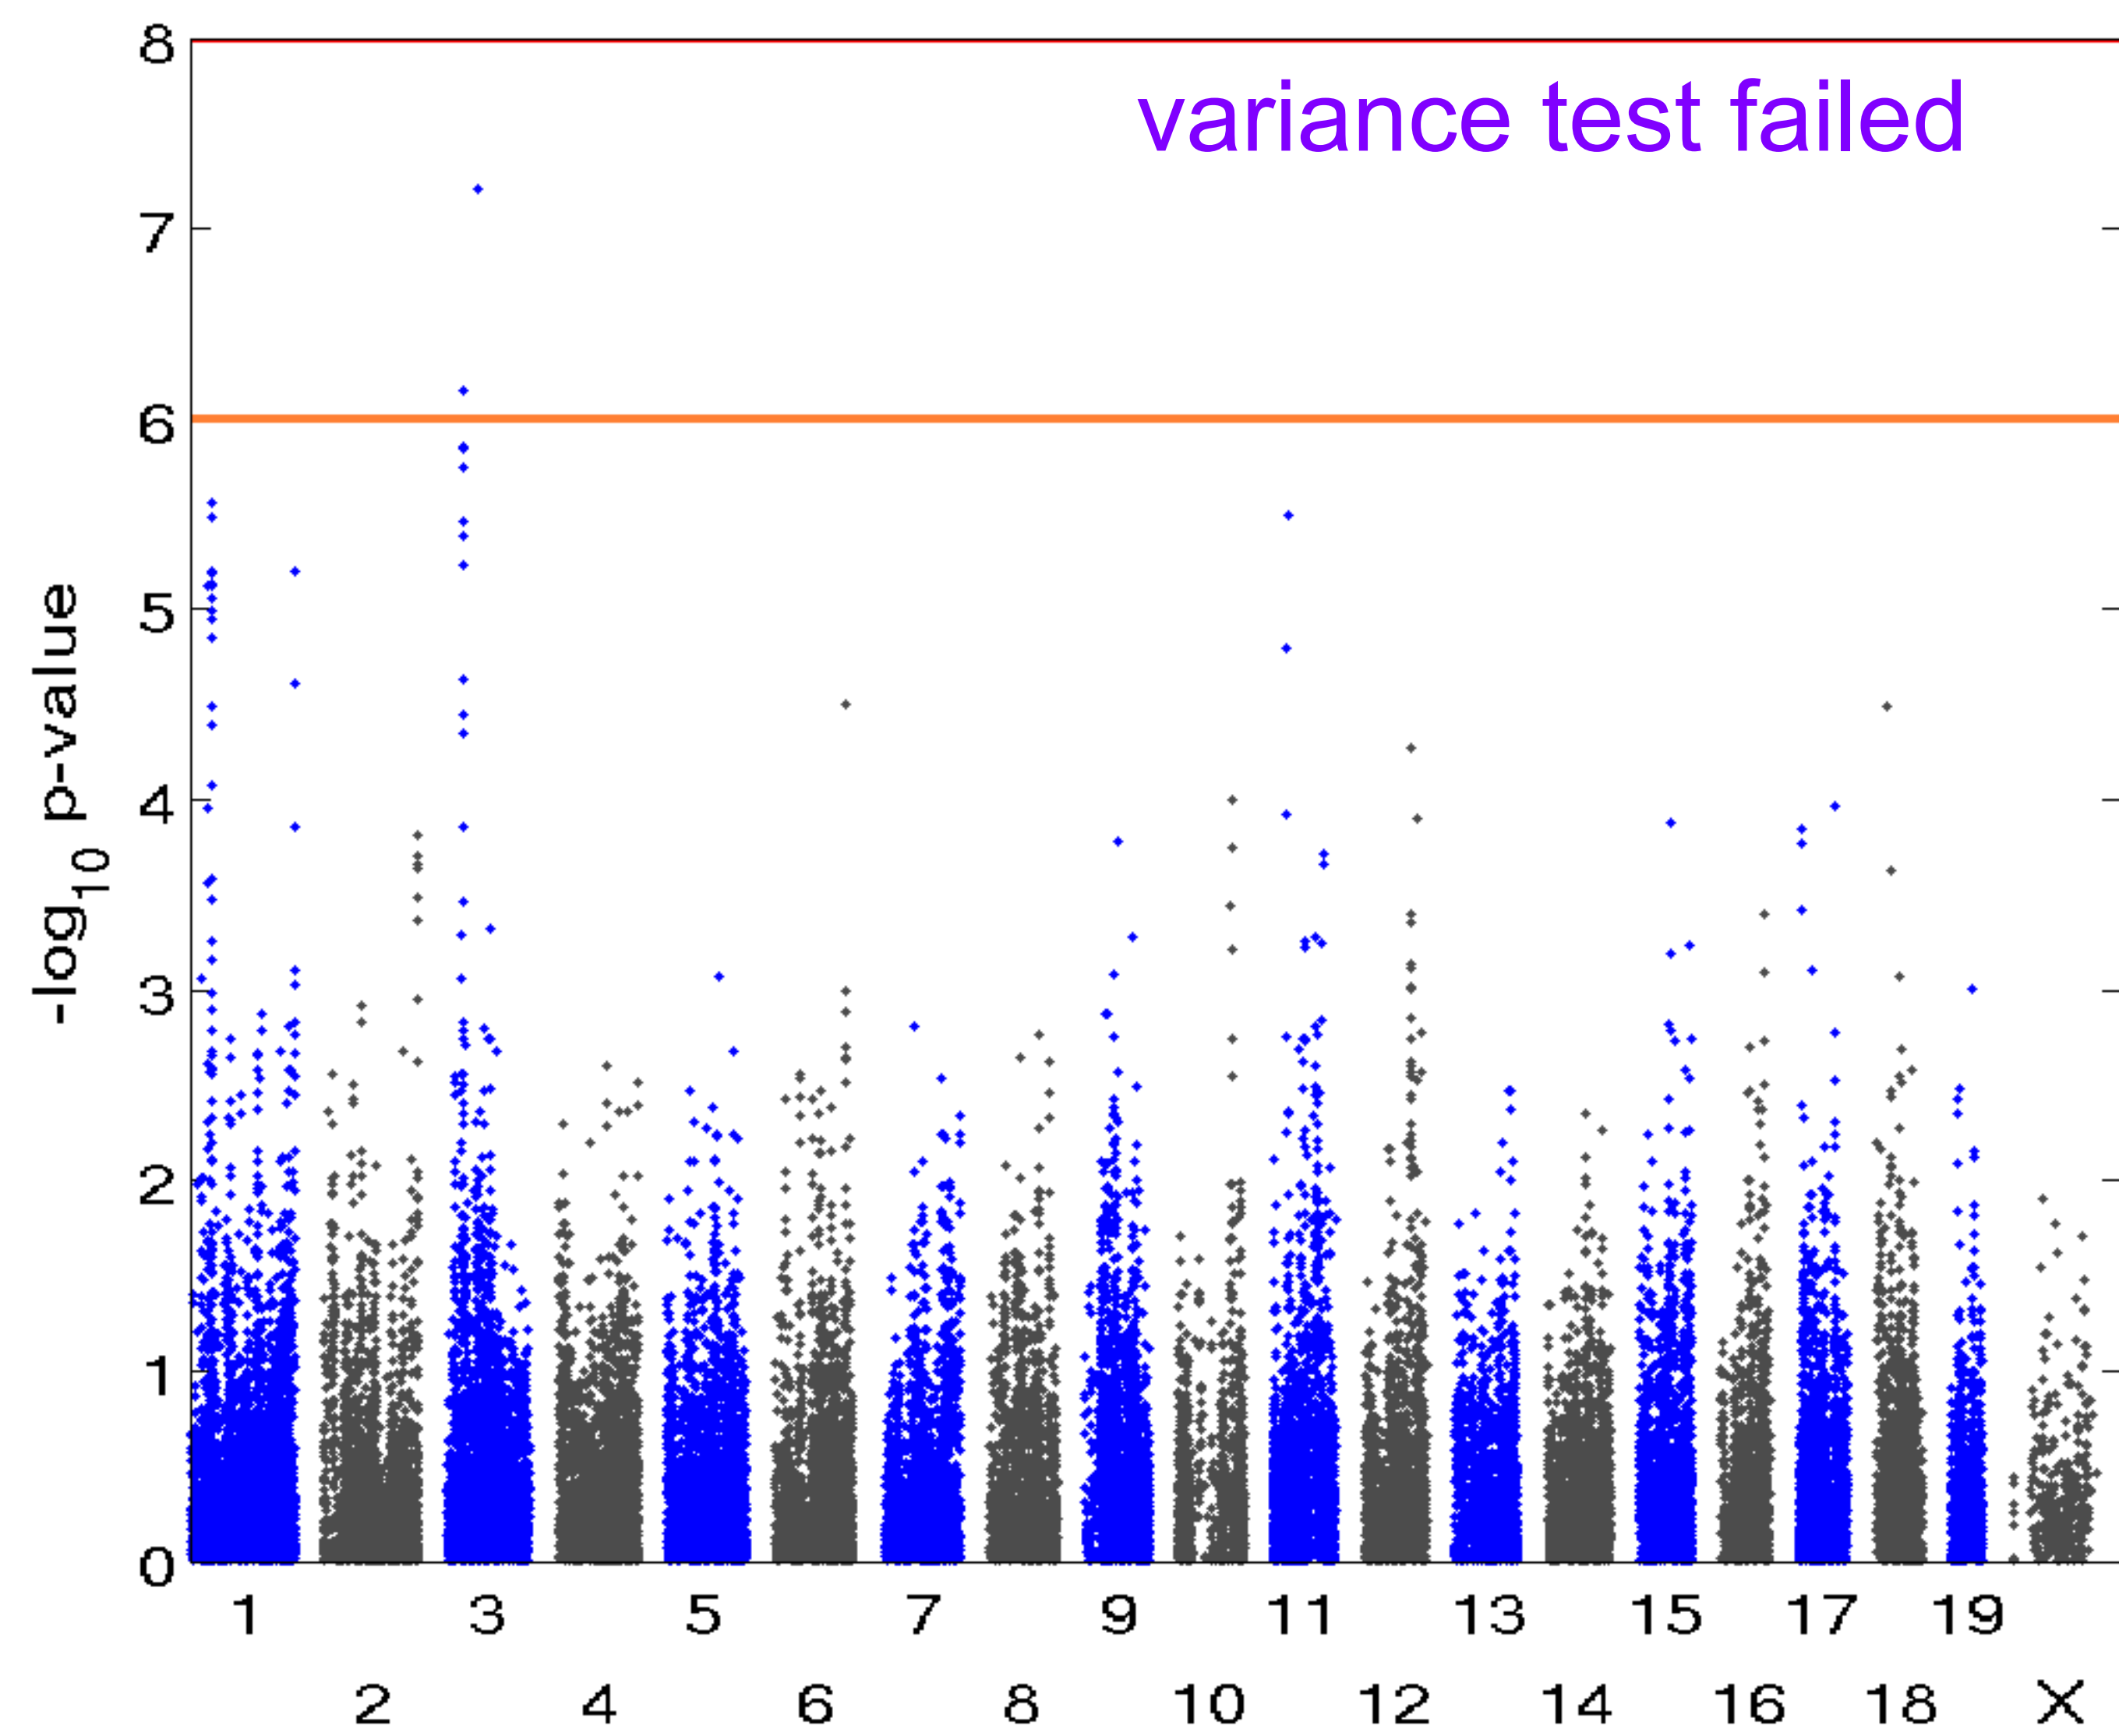

QT - ate vs ctr

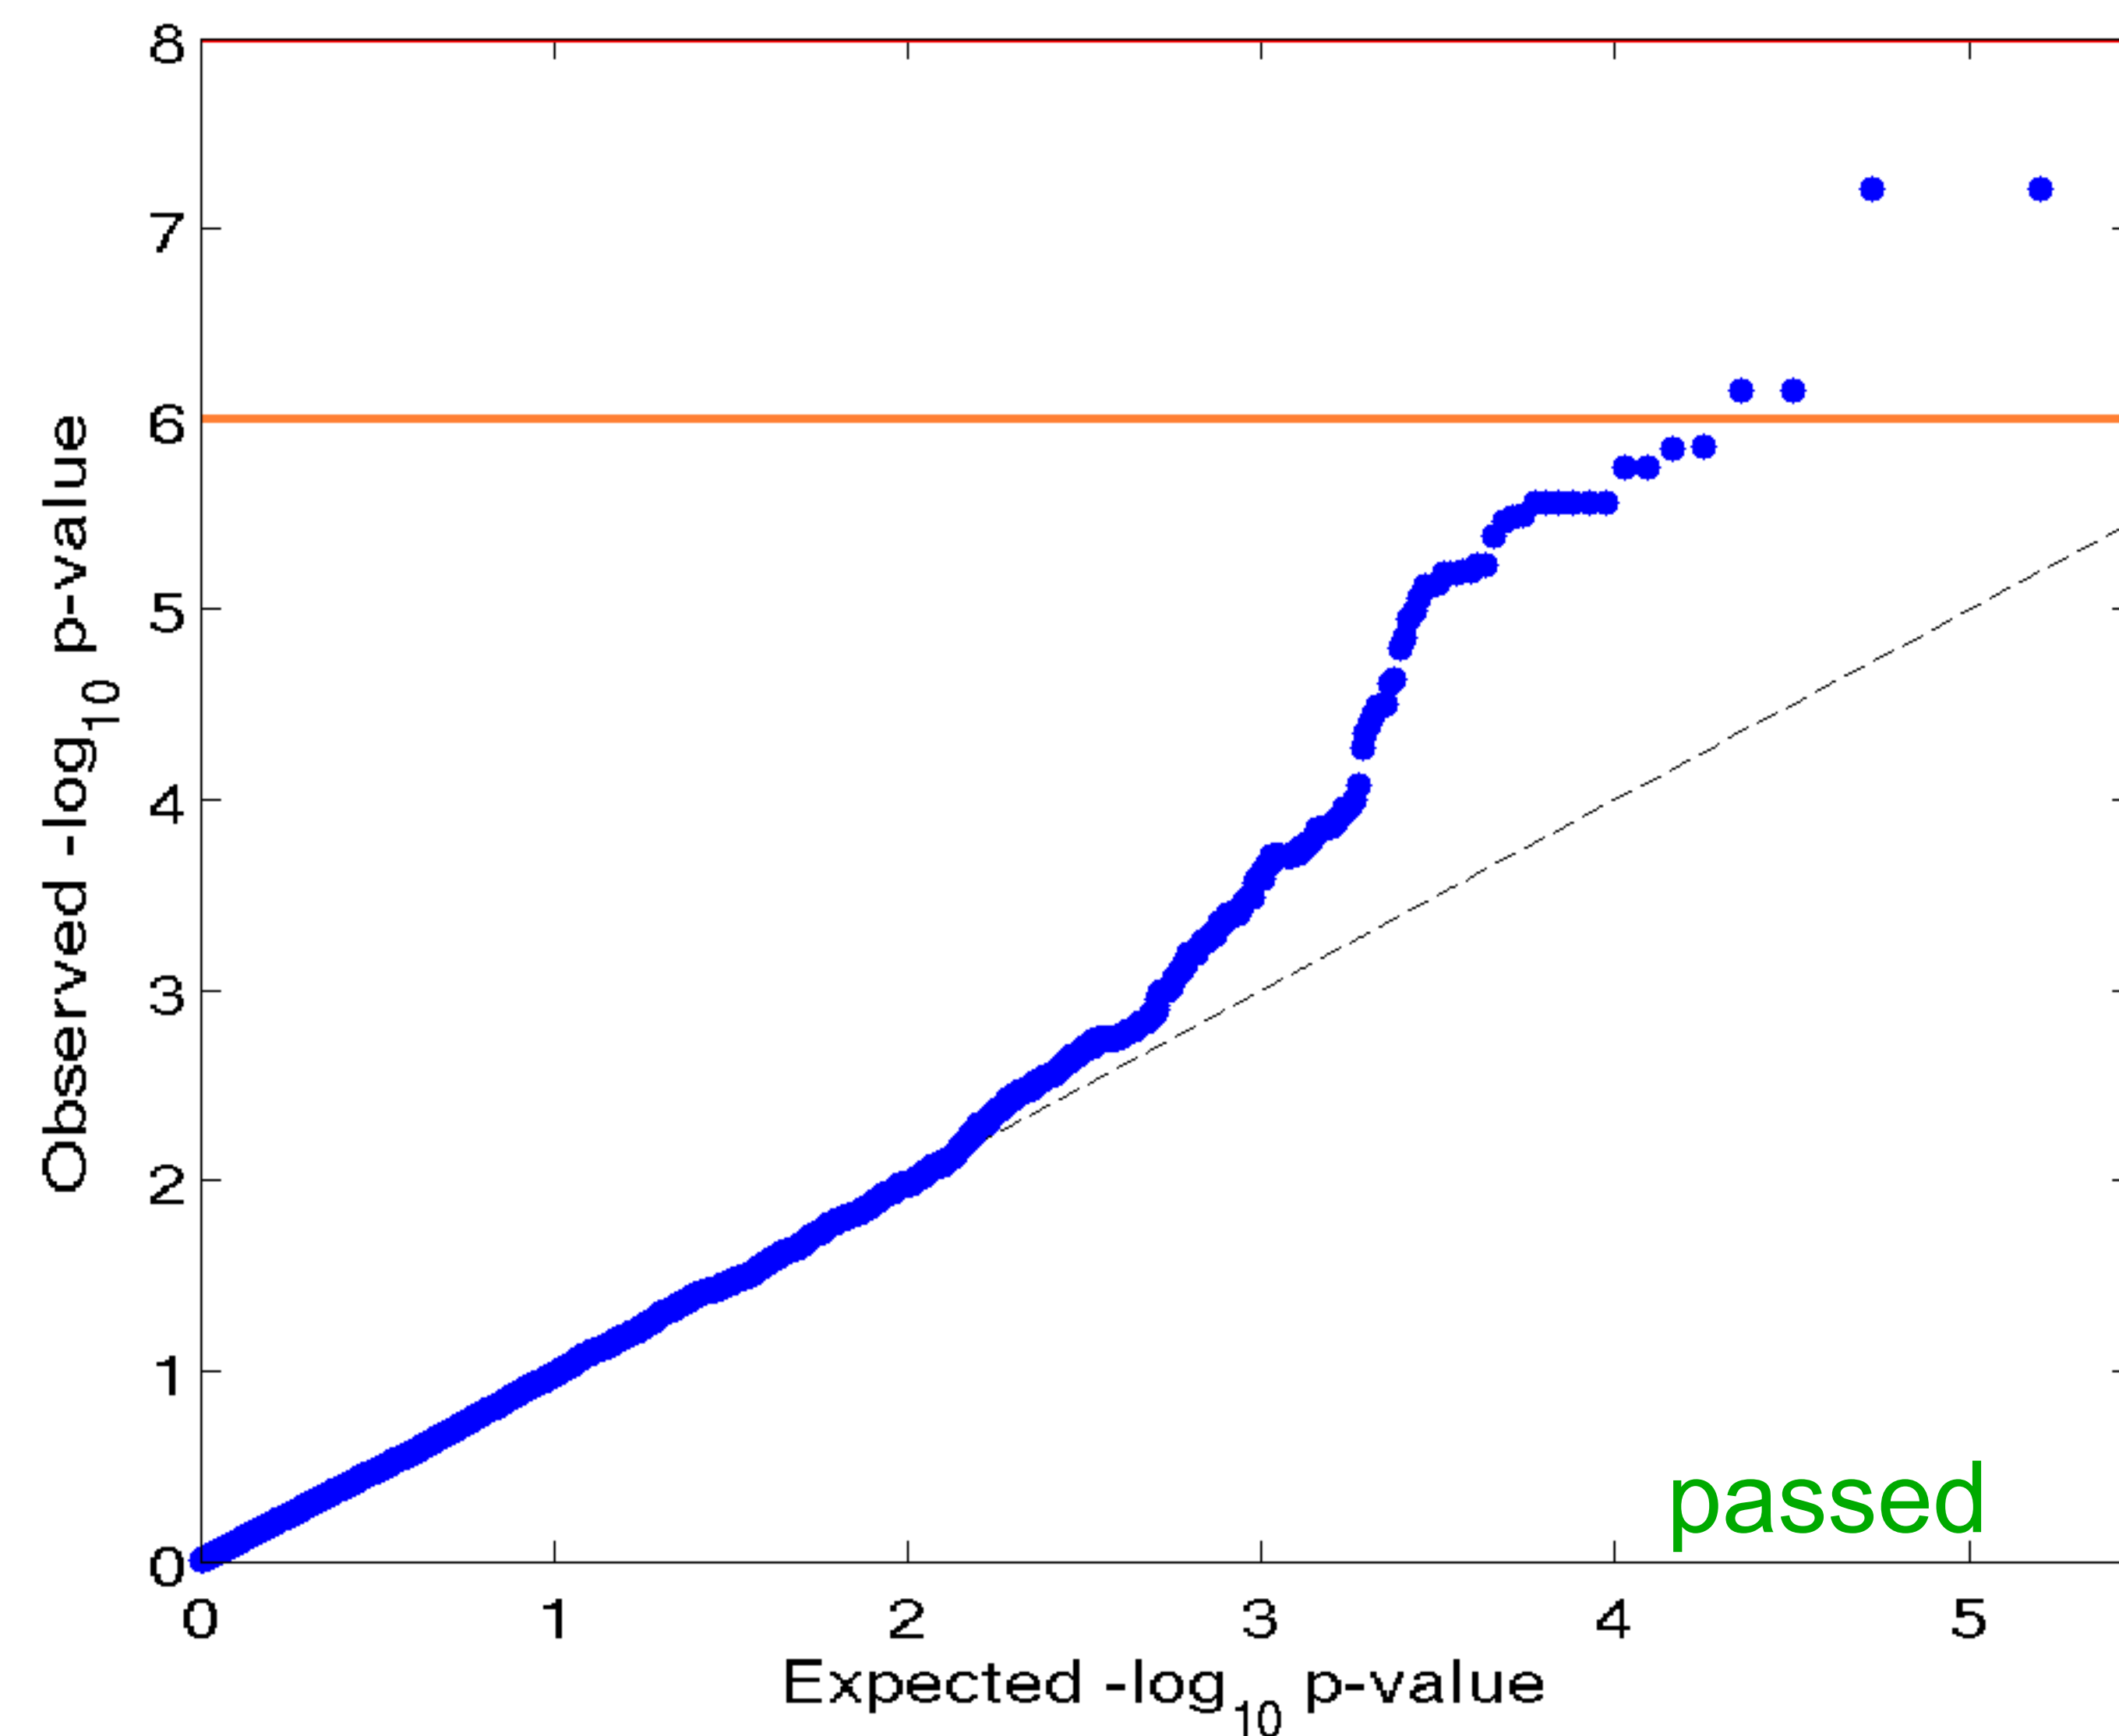



Ramp - ate vs ctr

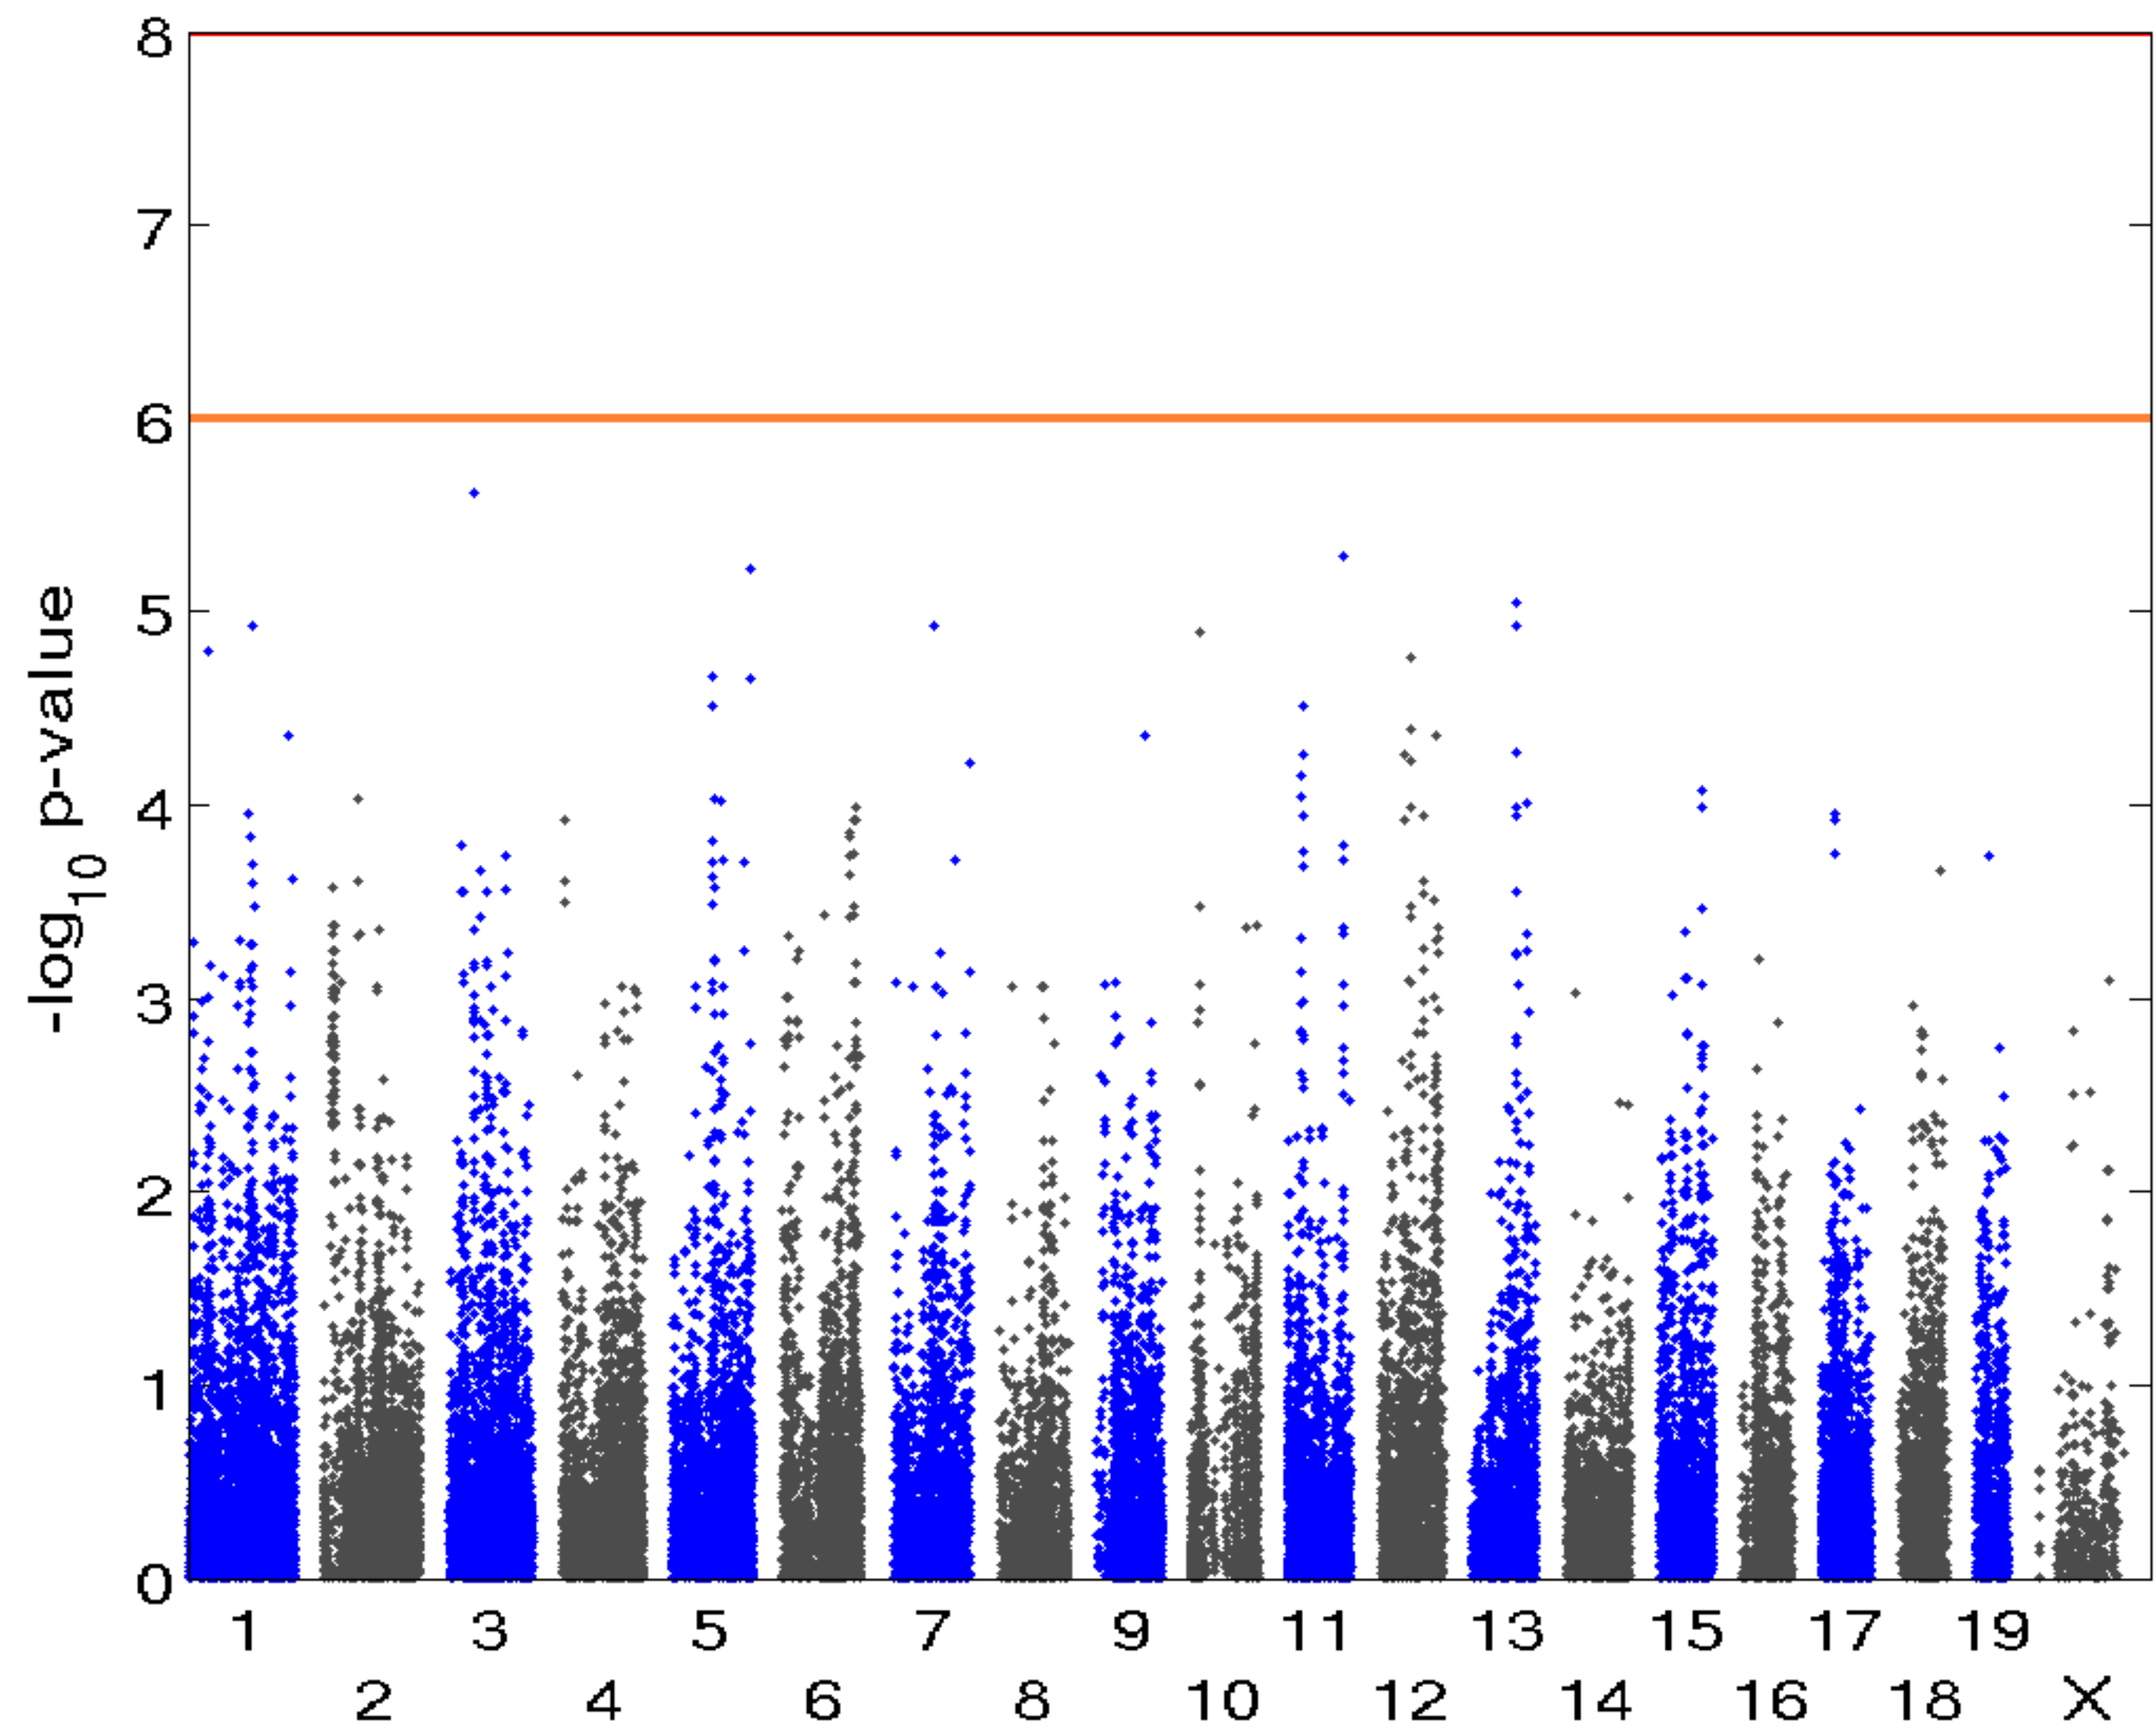

Ramp - ate vs ctr

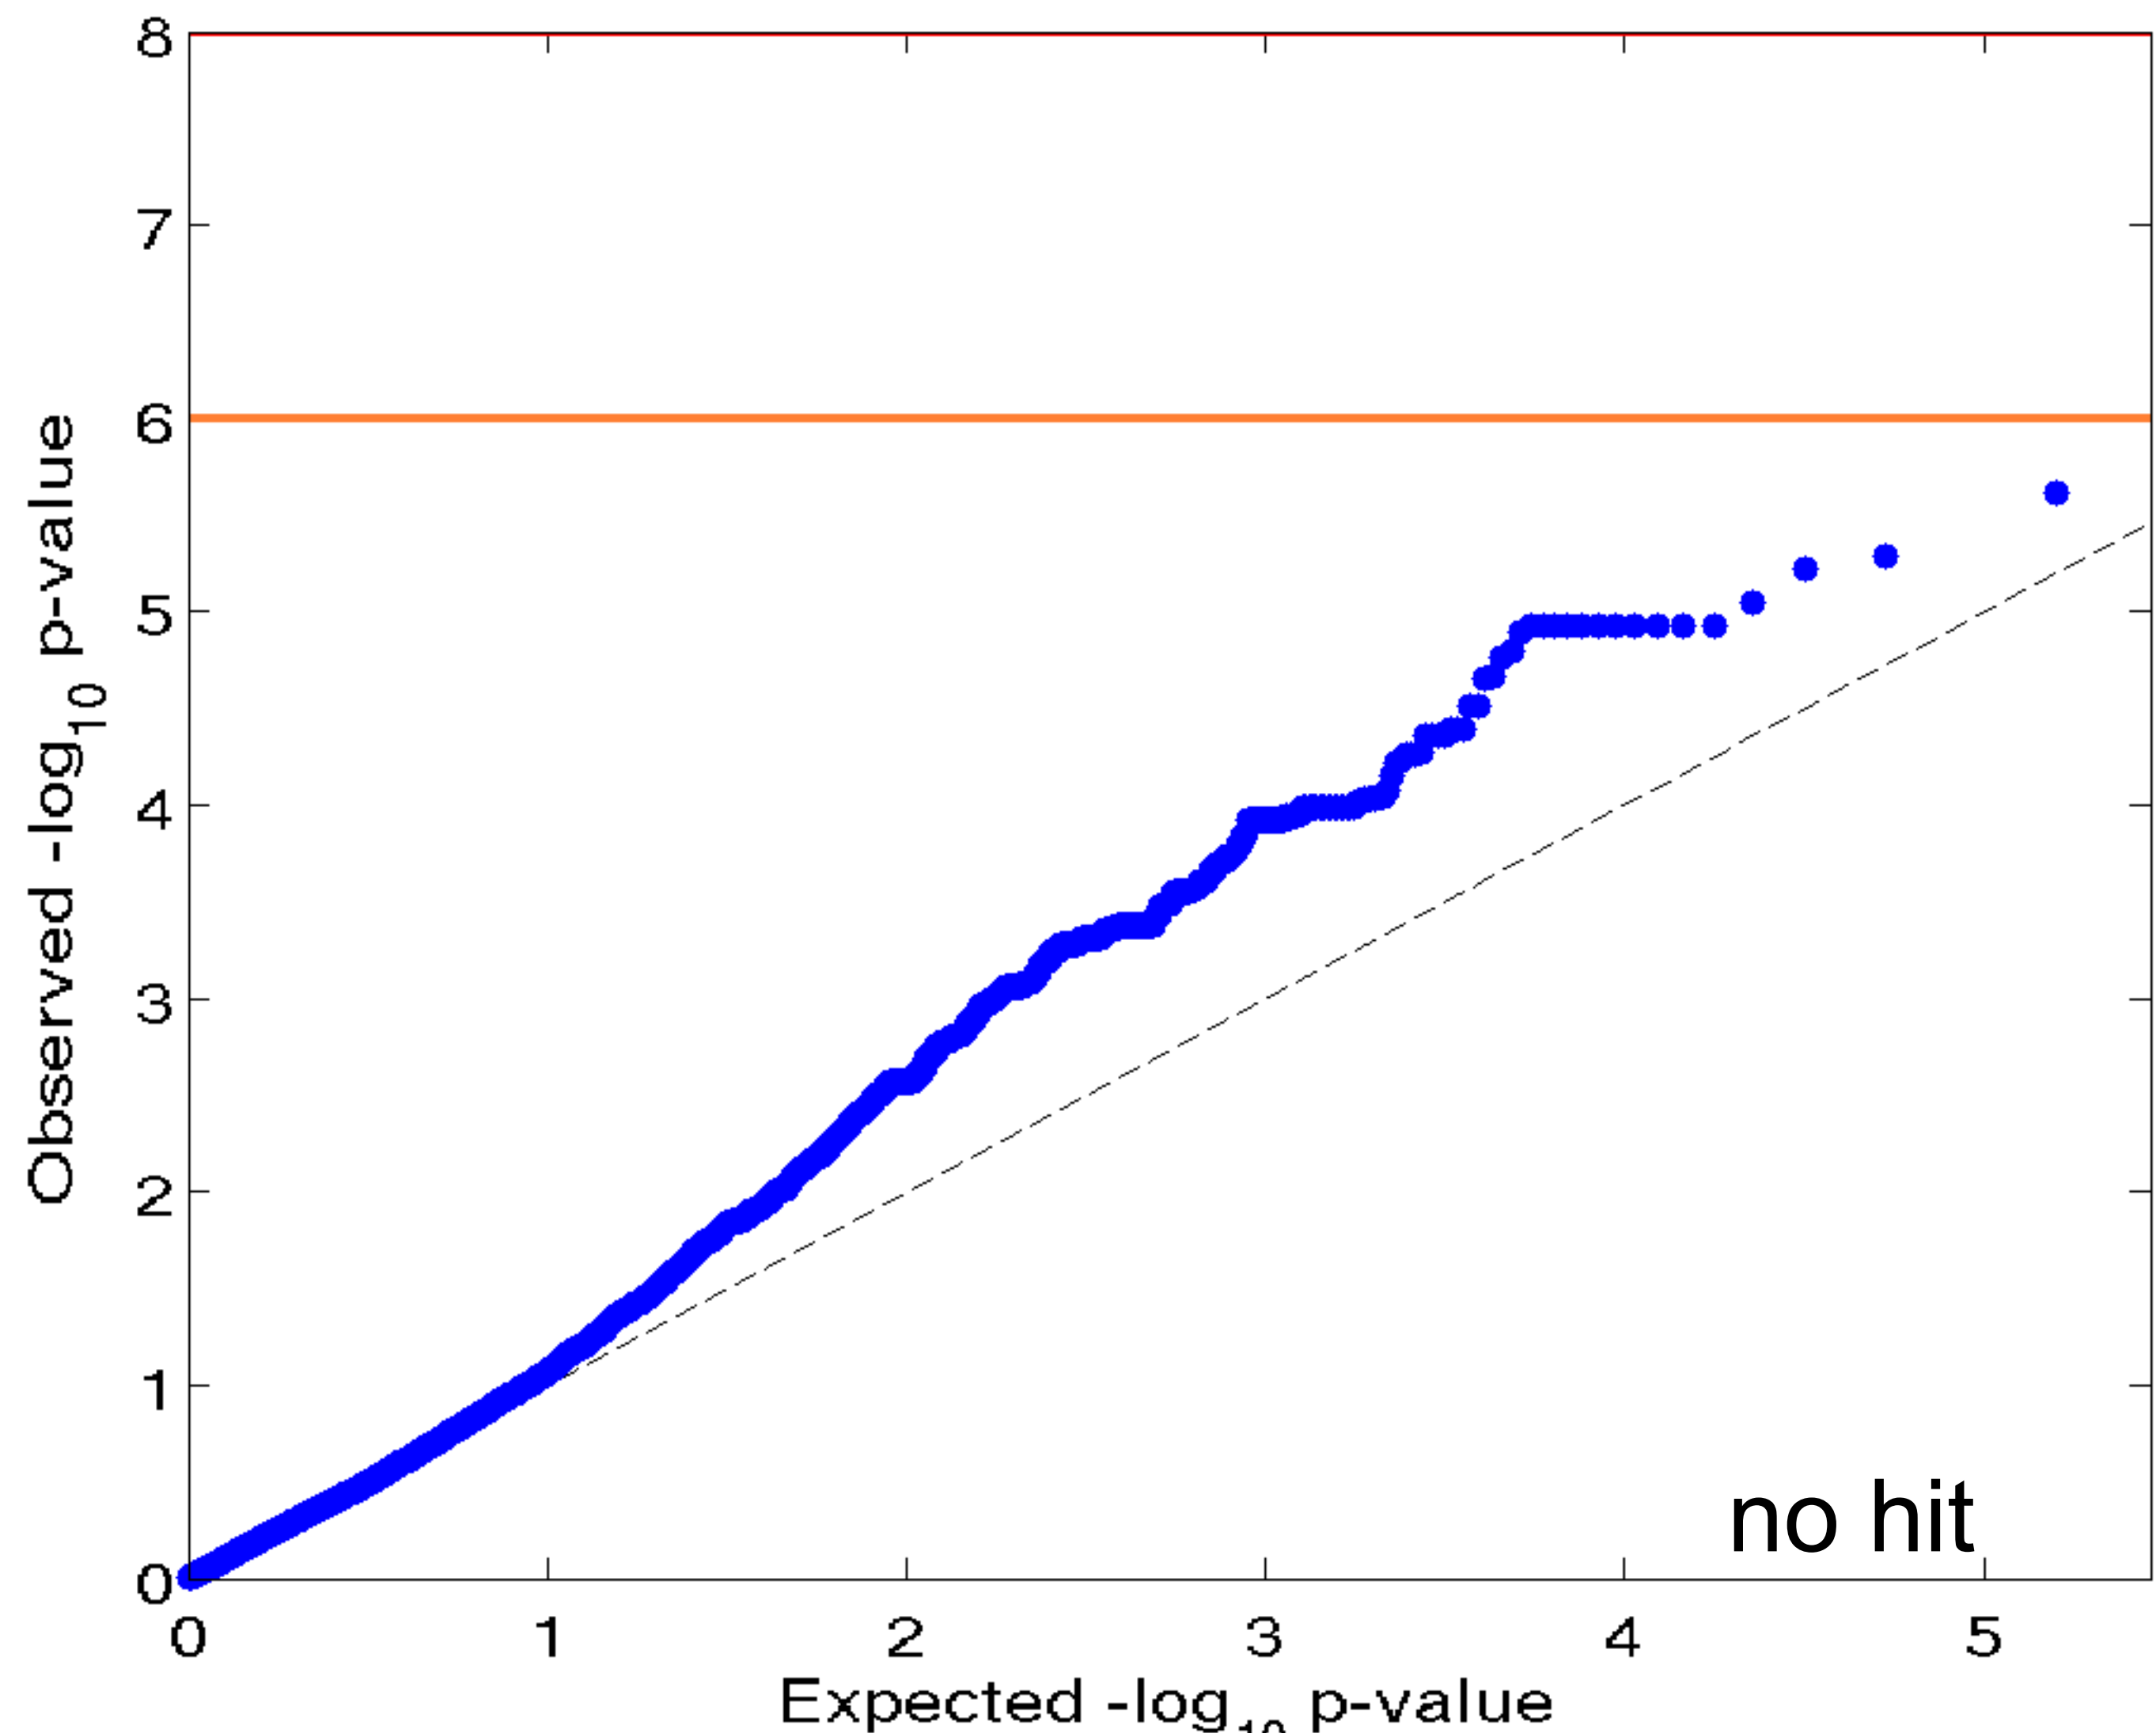

RR - ate vs ctr

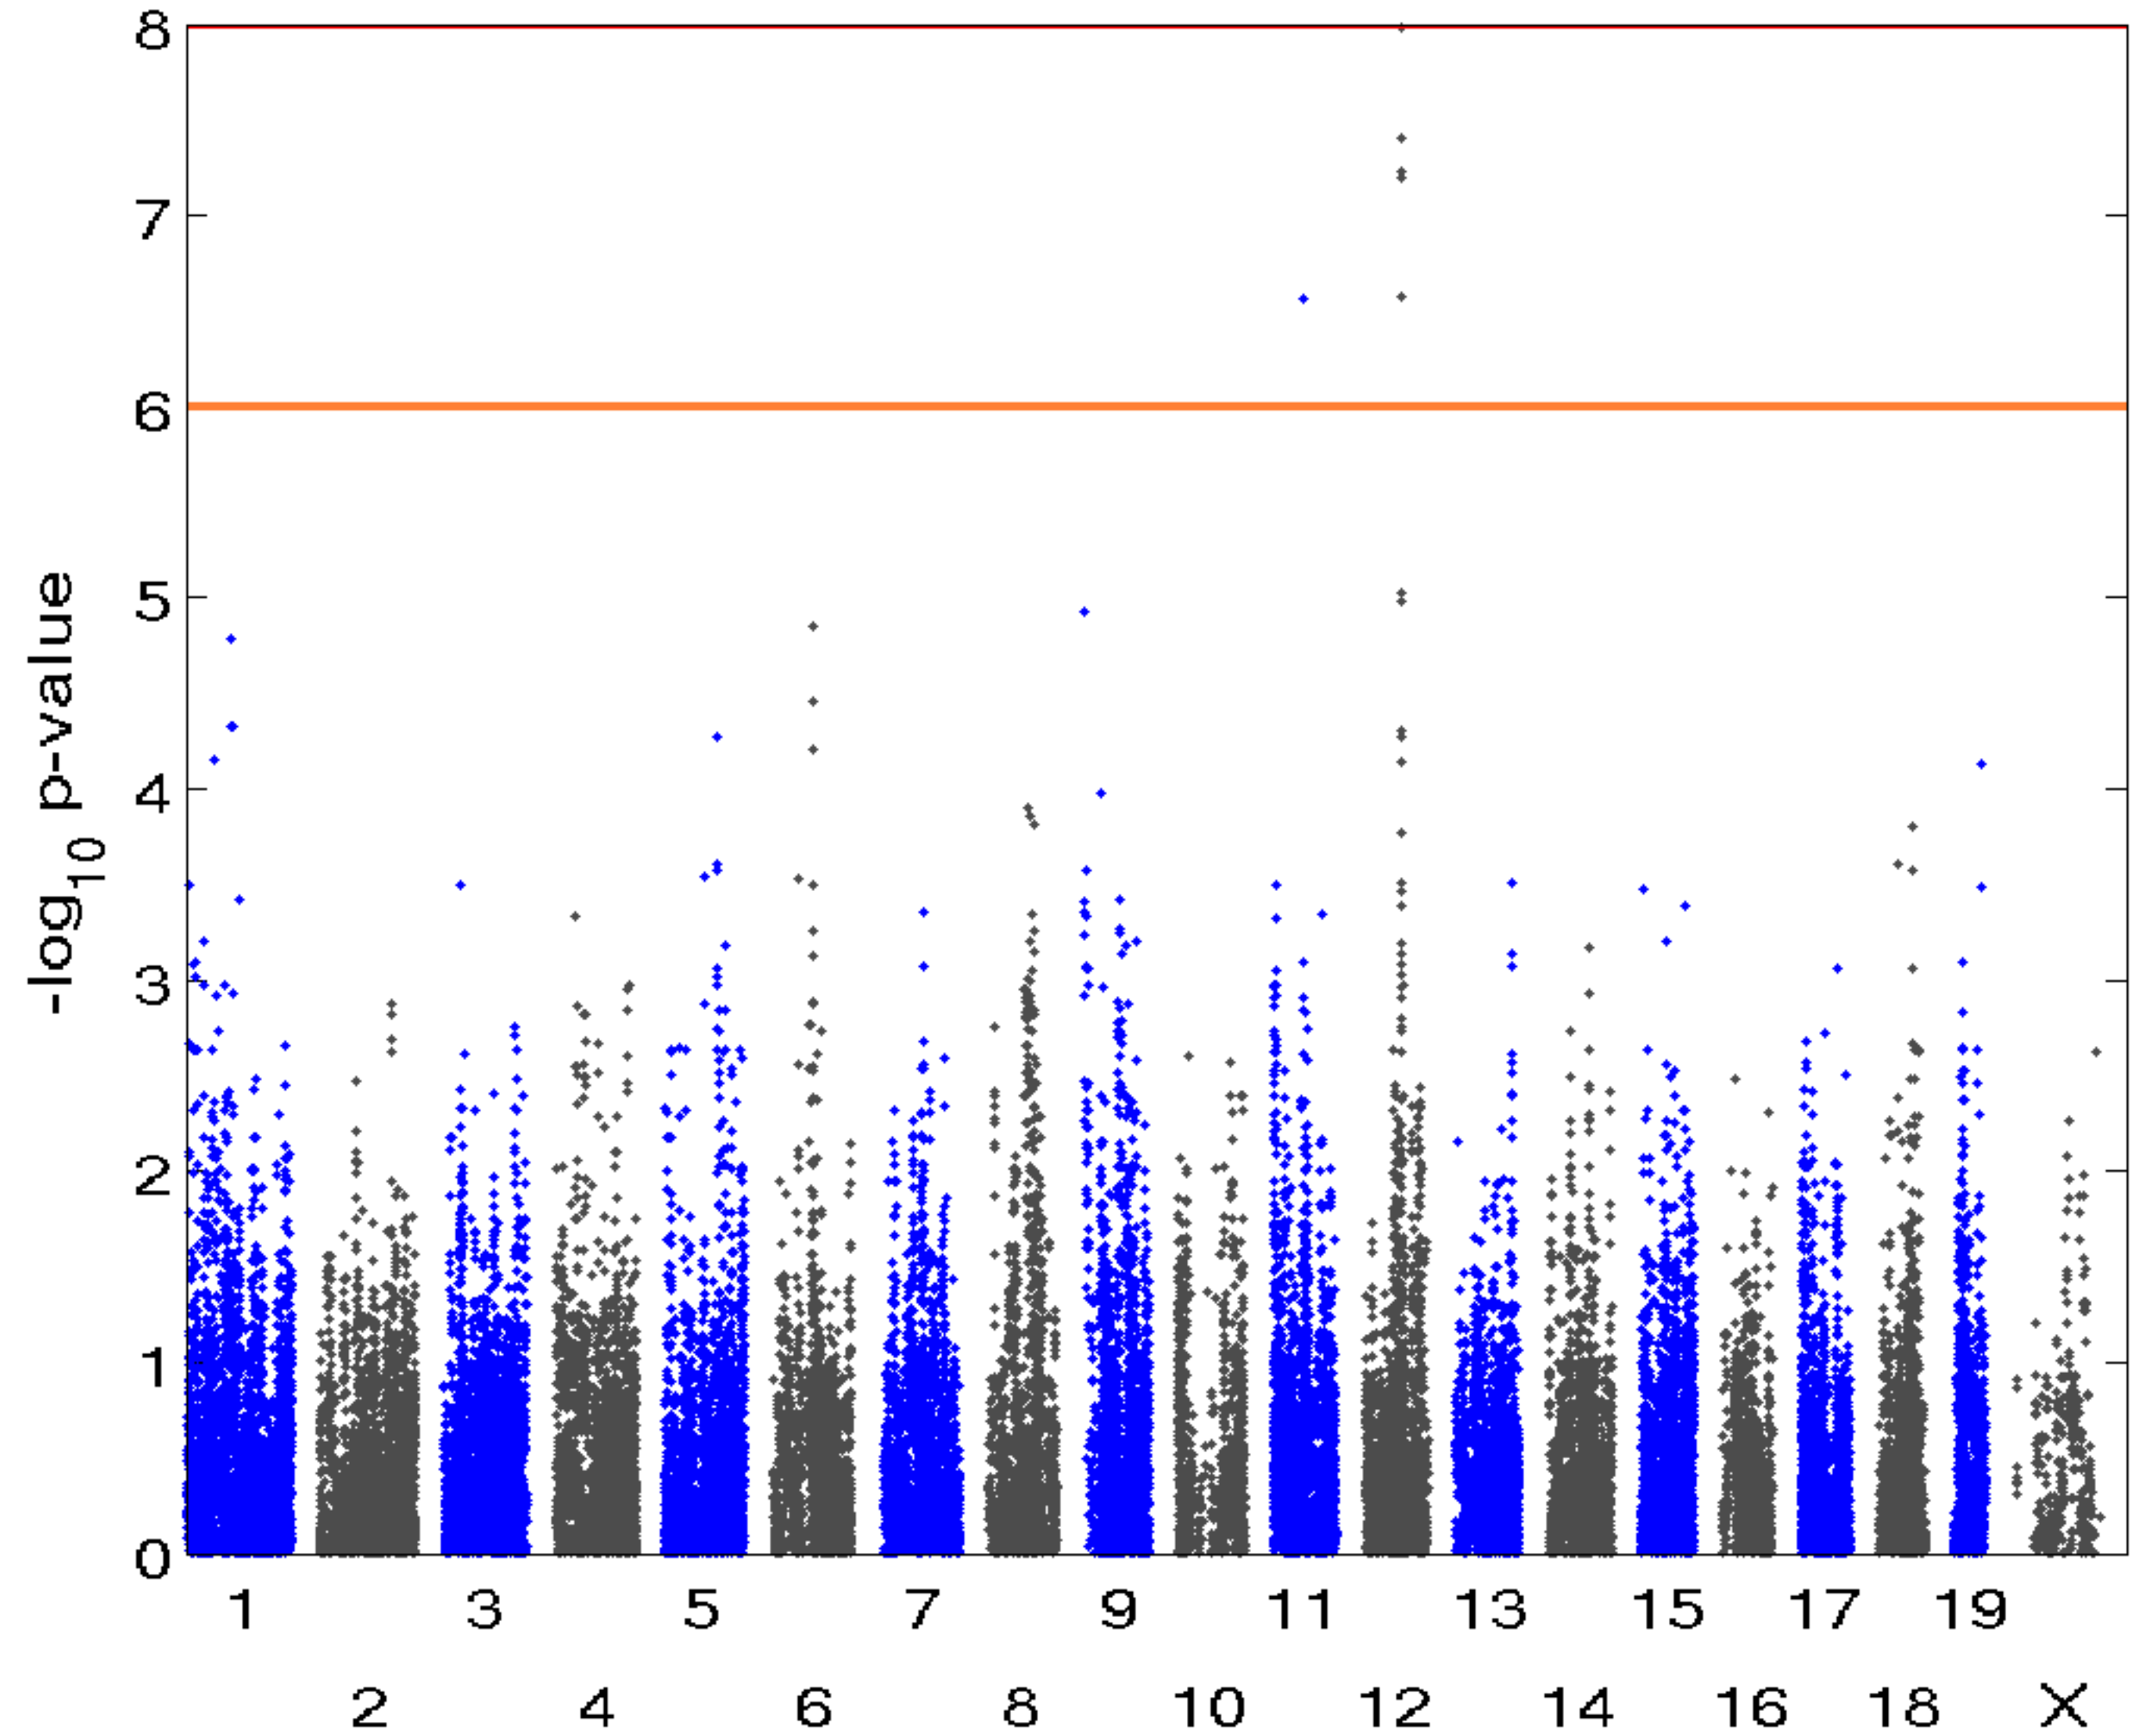

RR - ate vs ctr

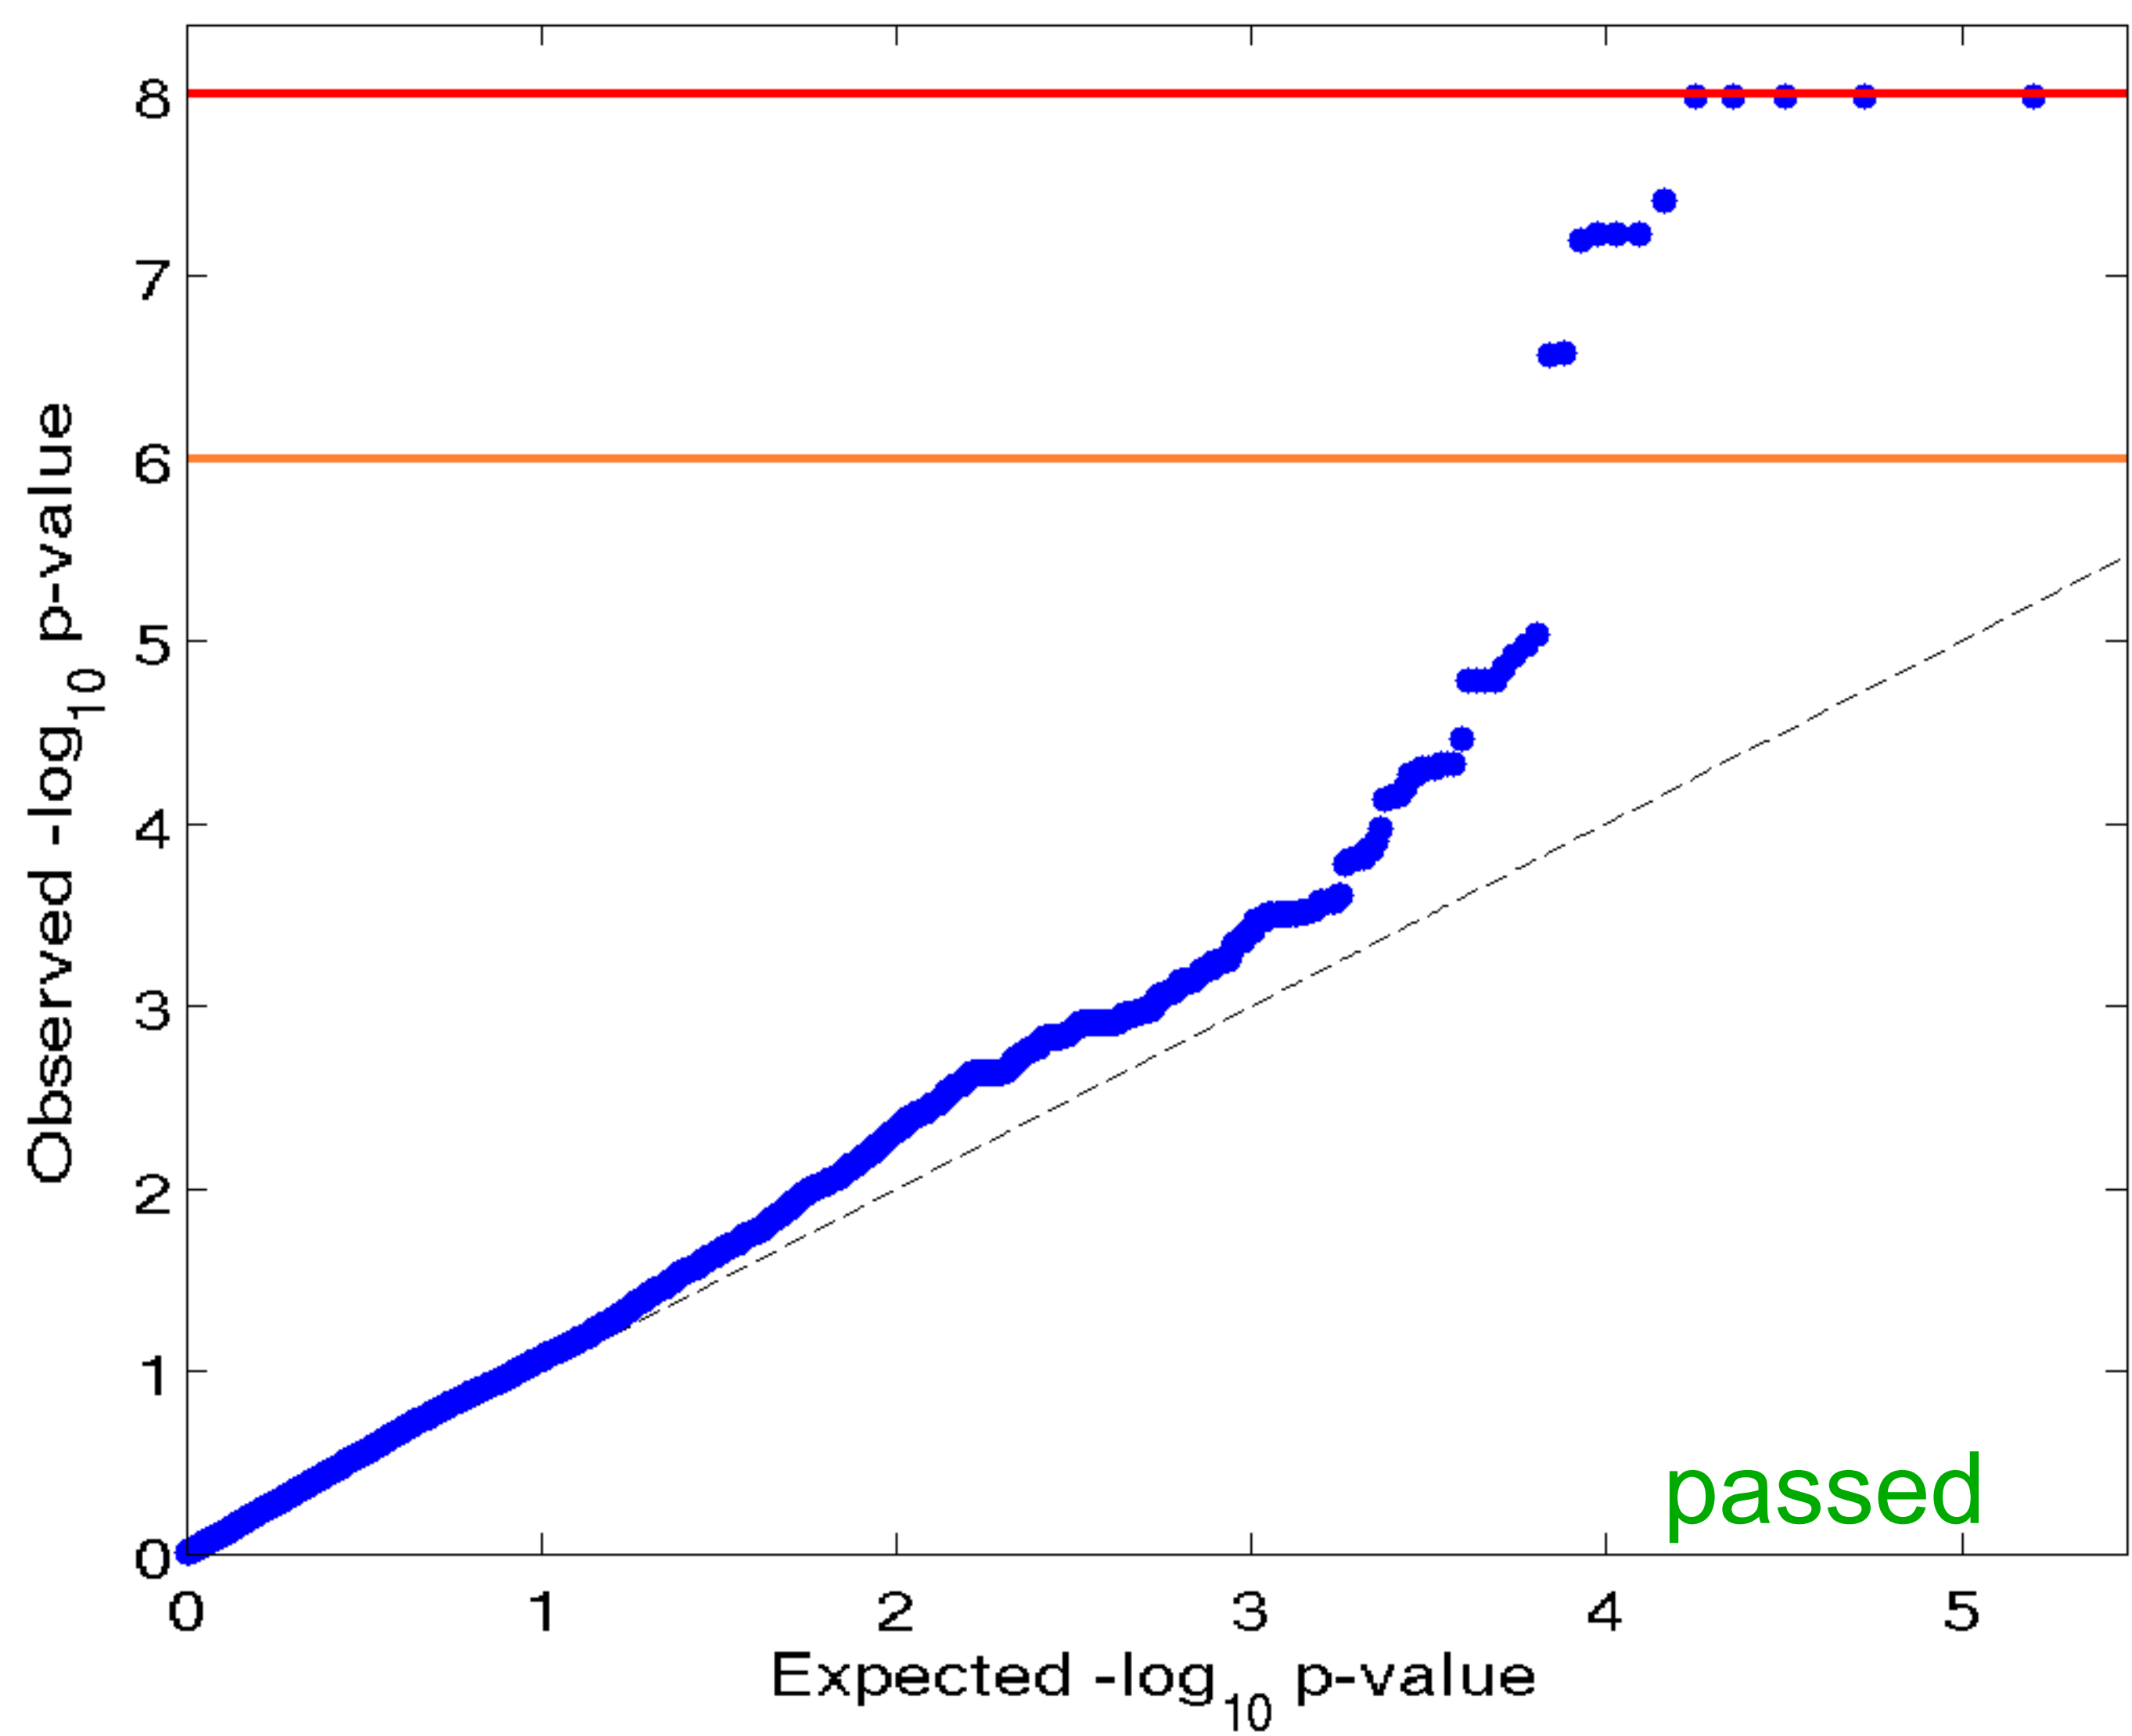

Samp - ate vs ctr

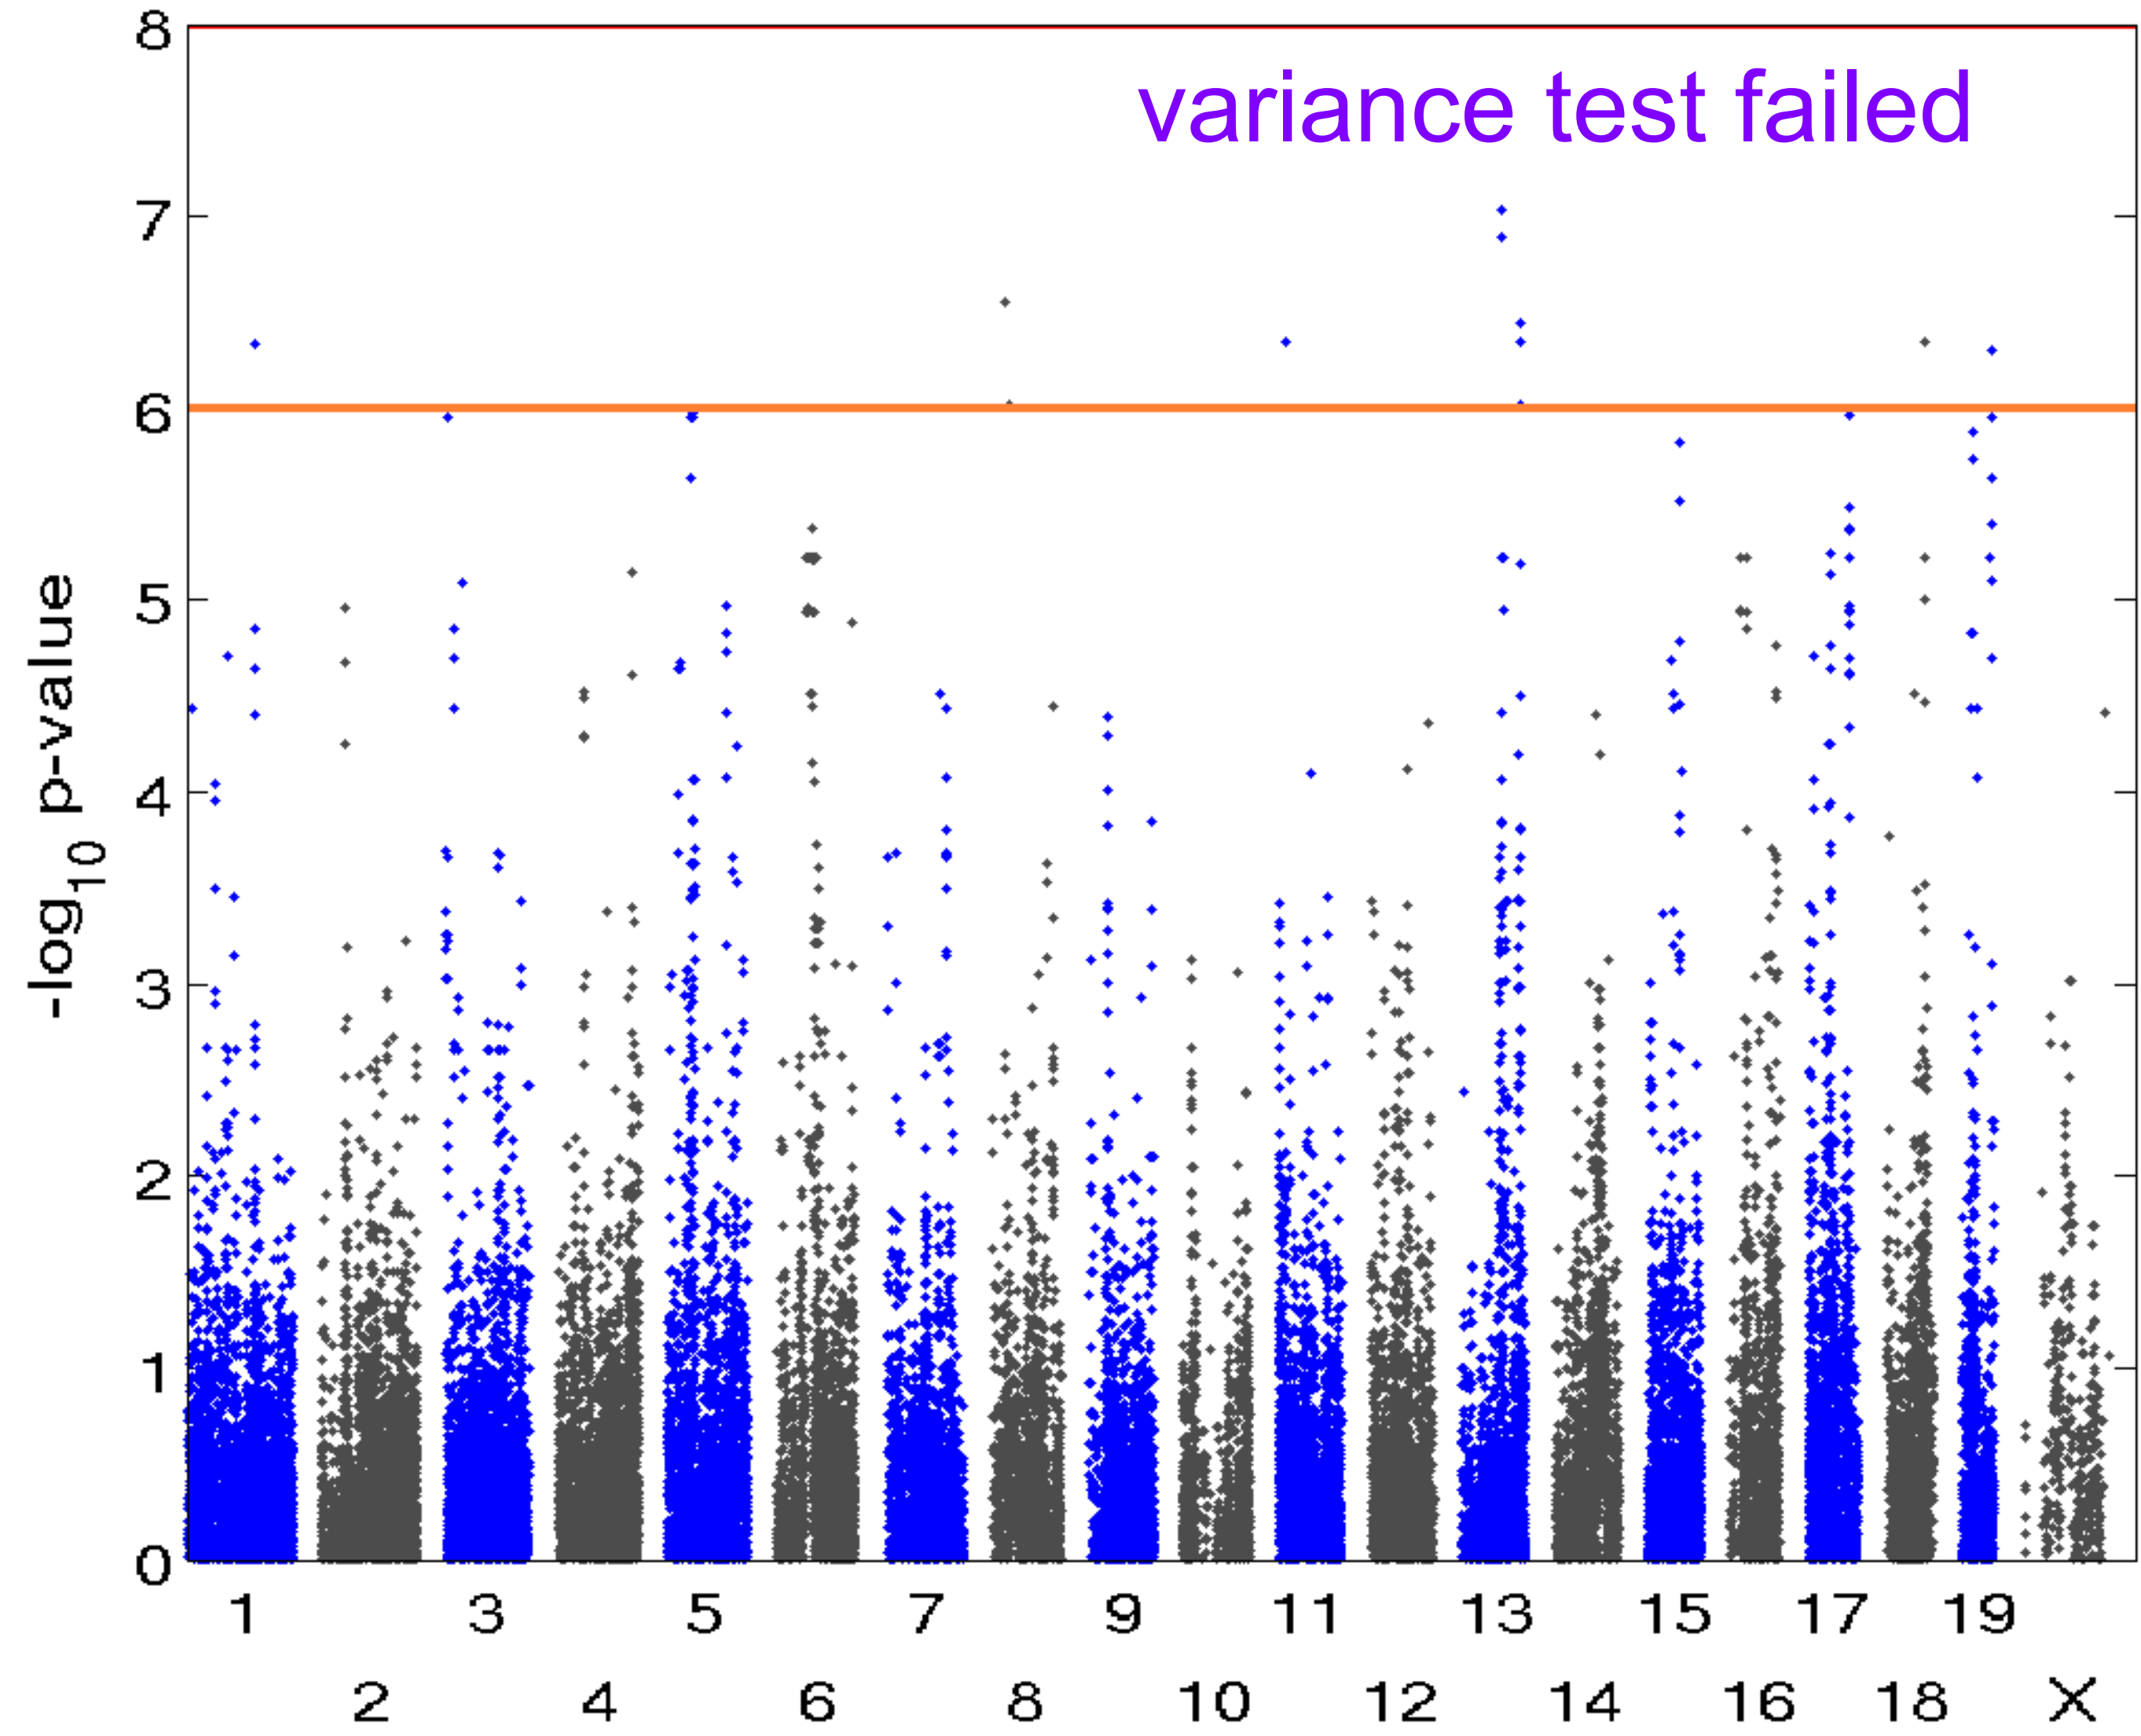

Samp - ate vs ctr

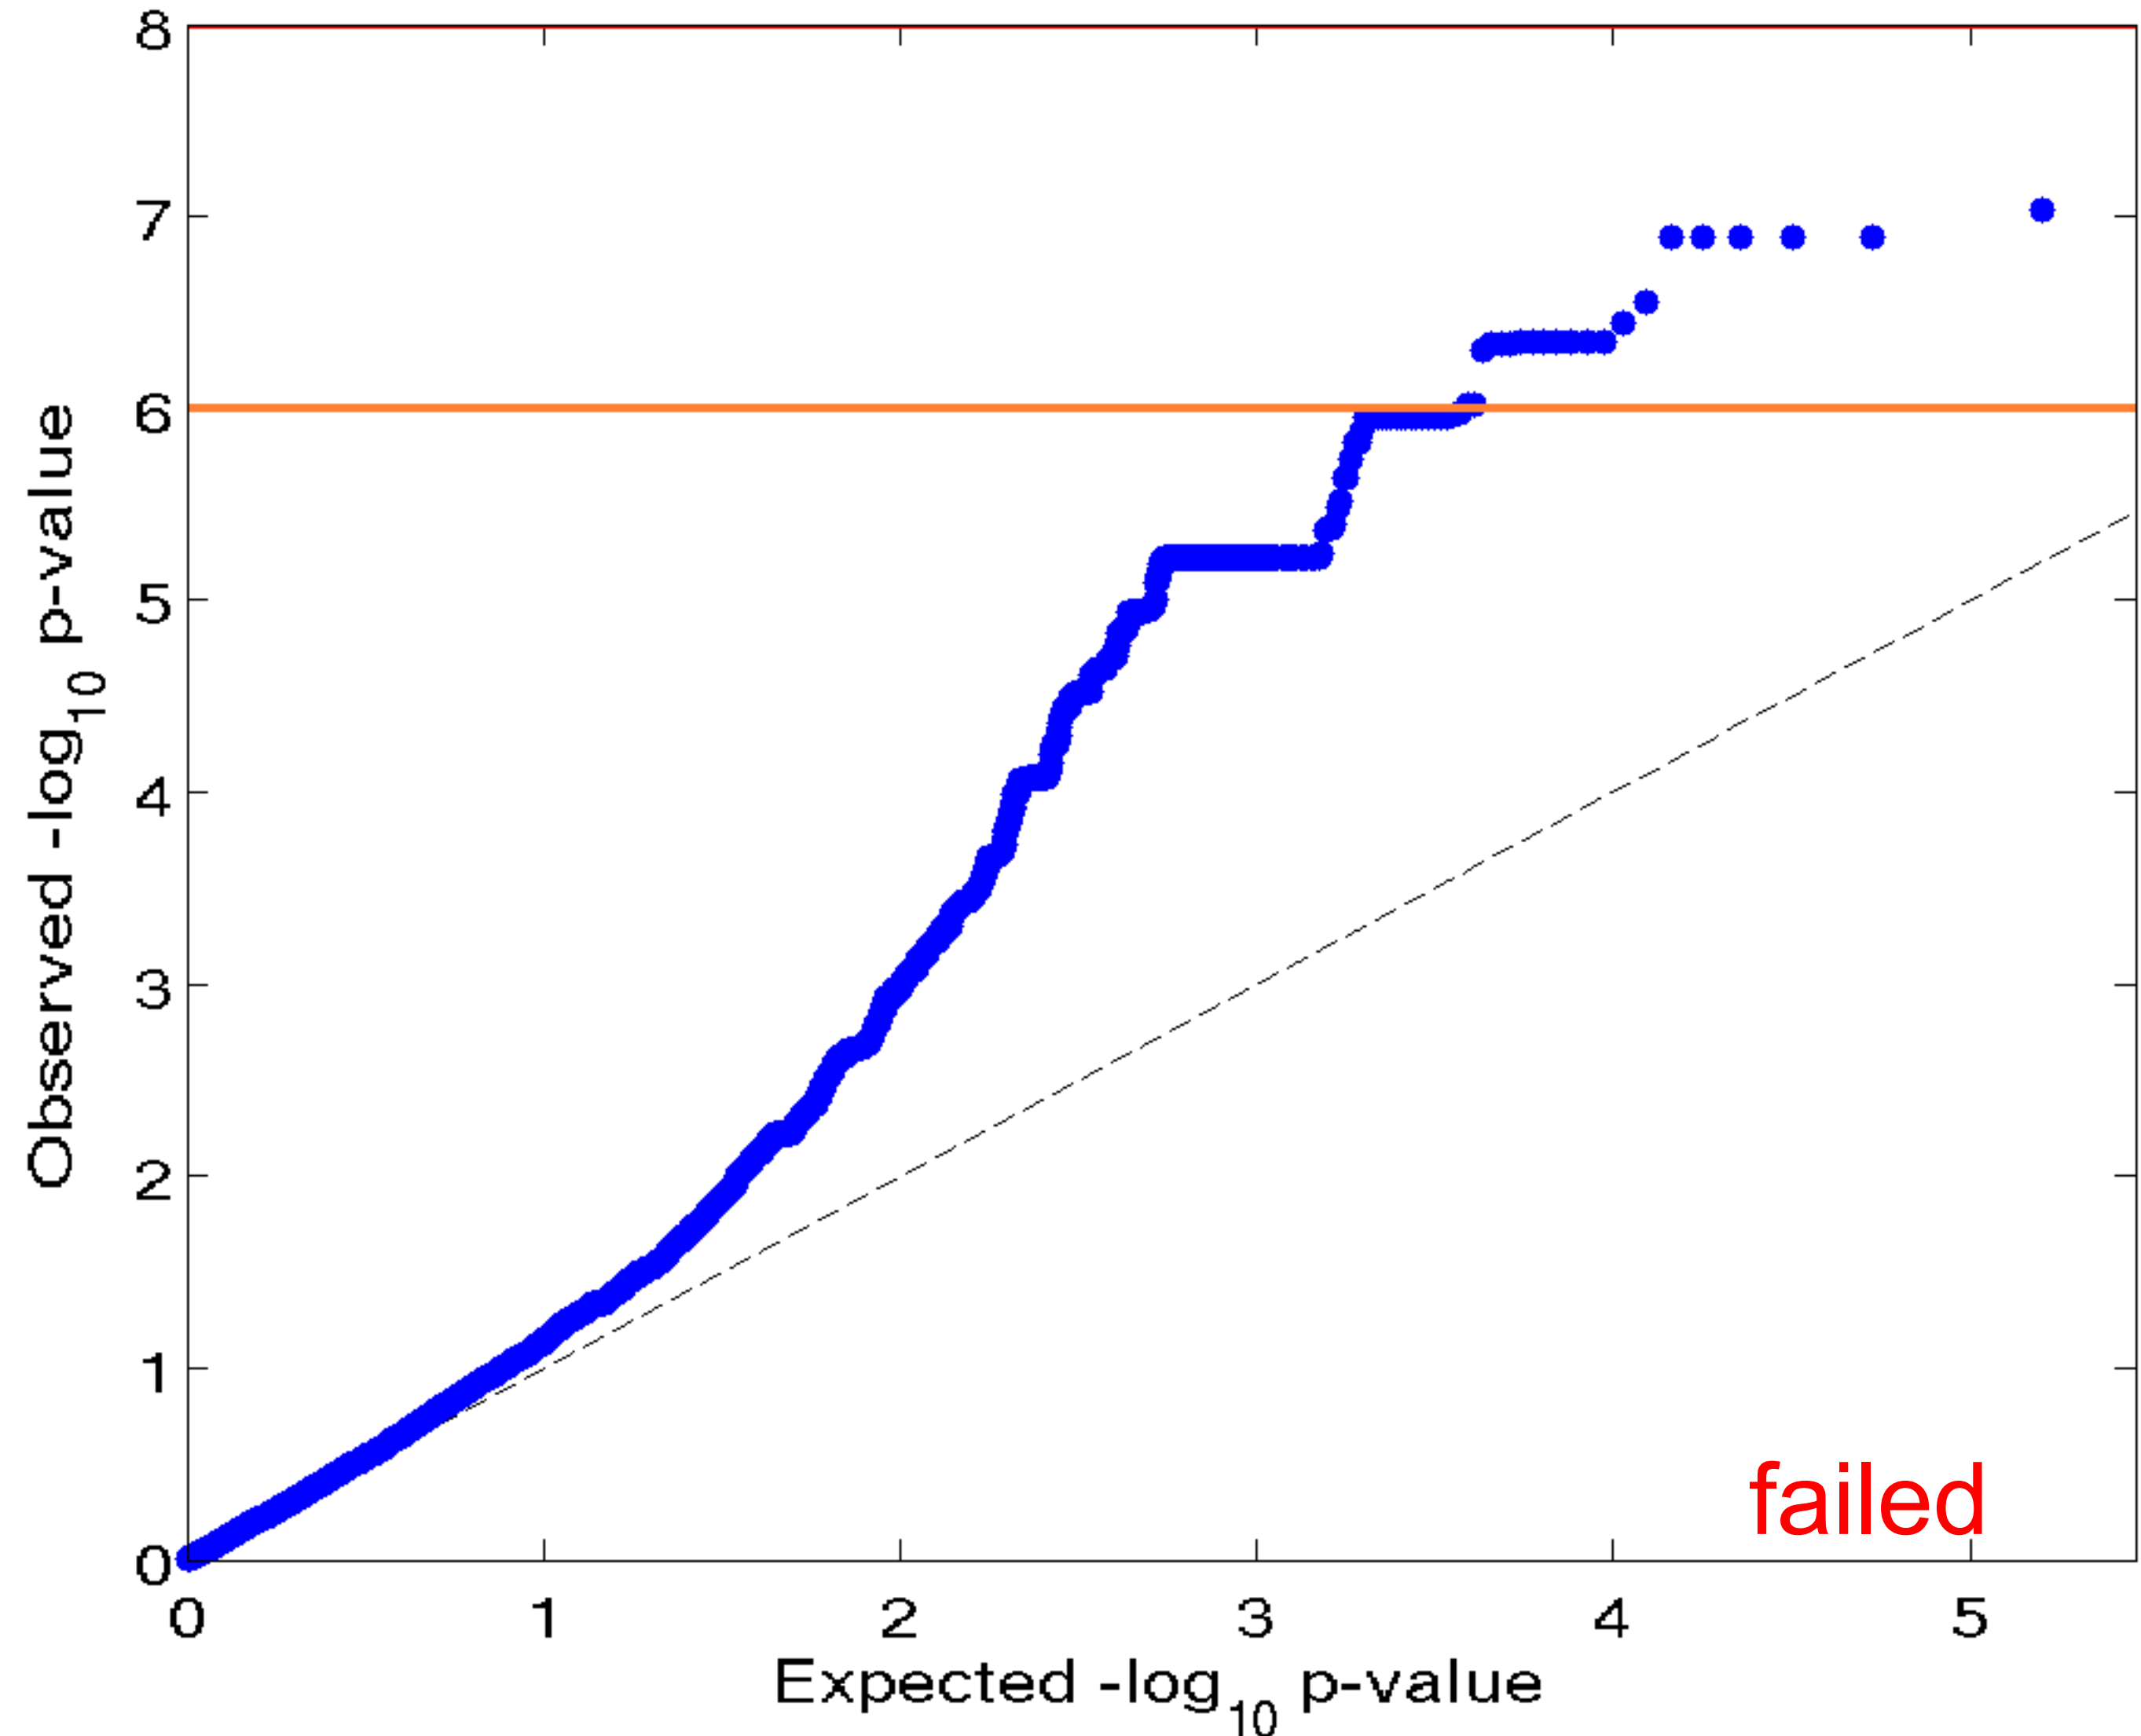

SBP - ate vs ctr

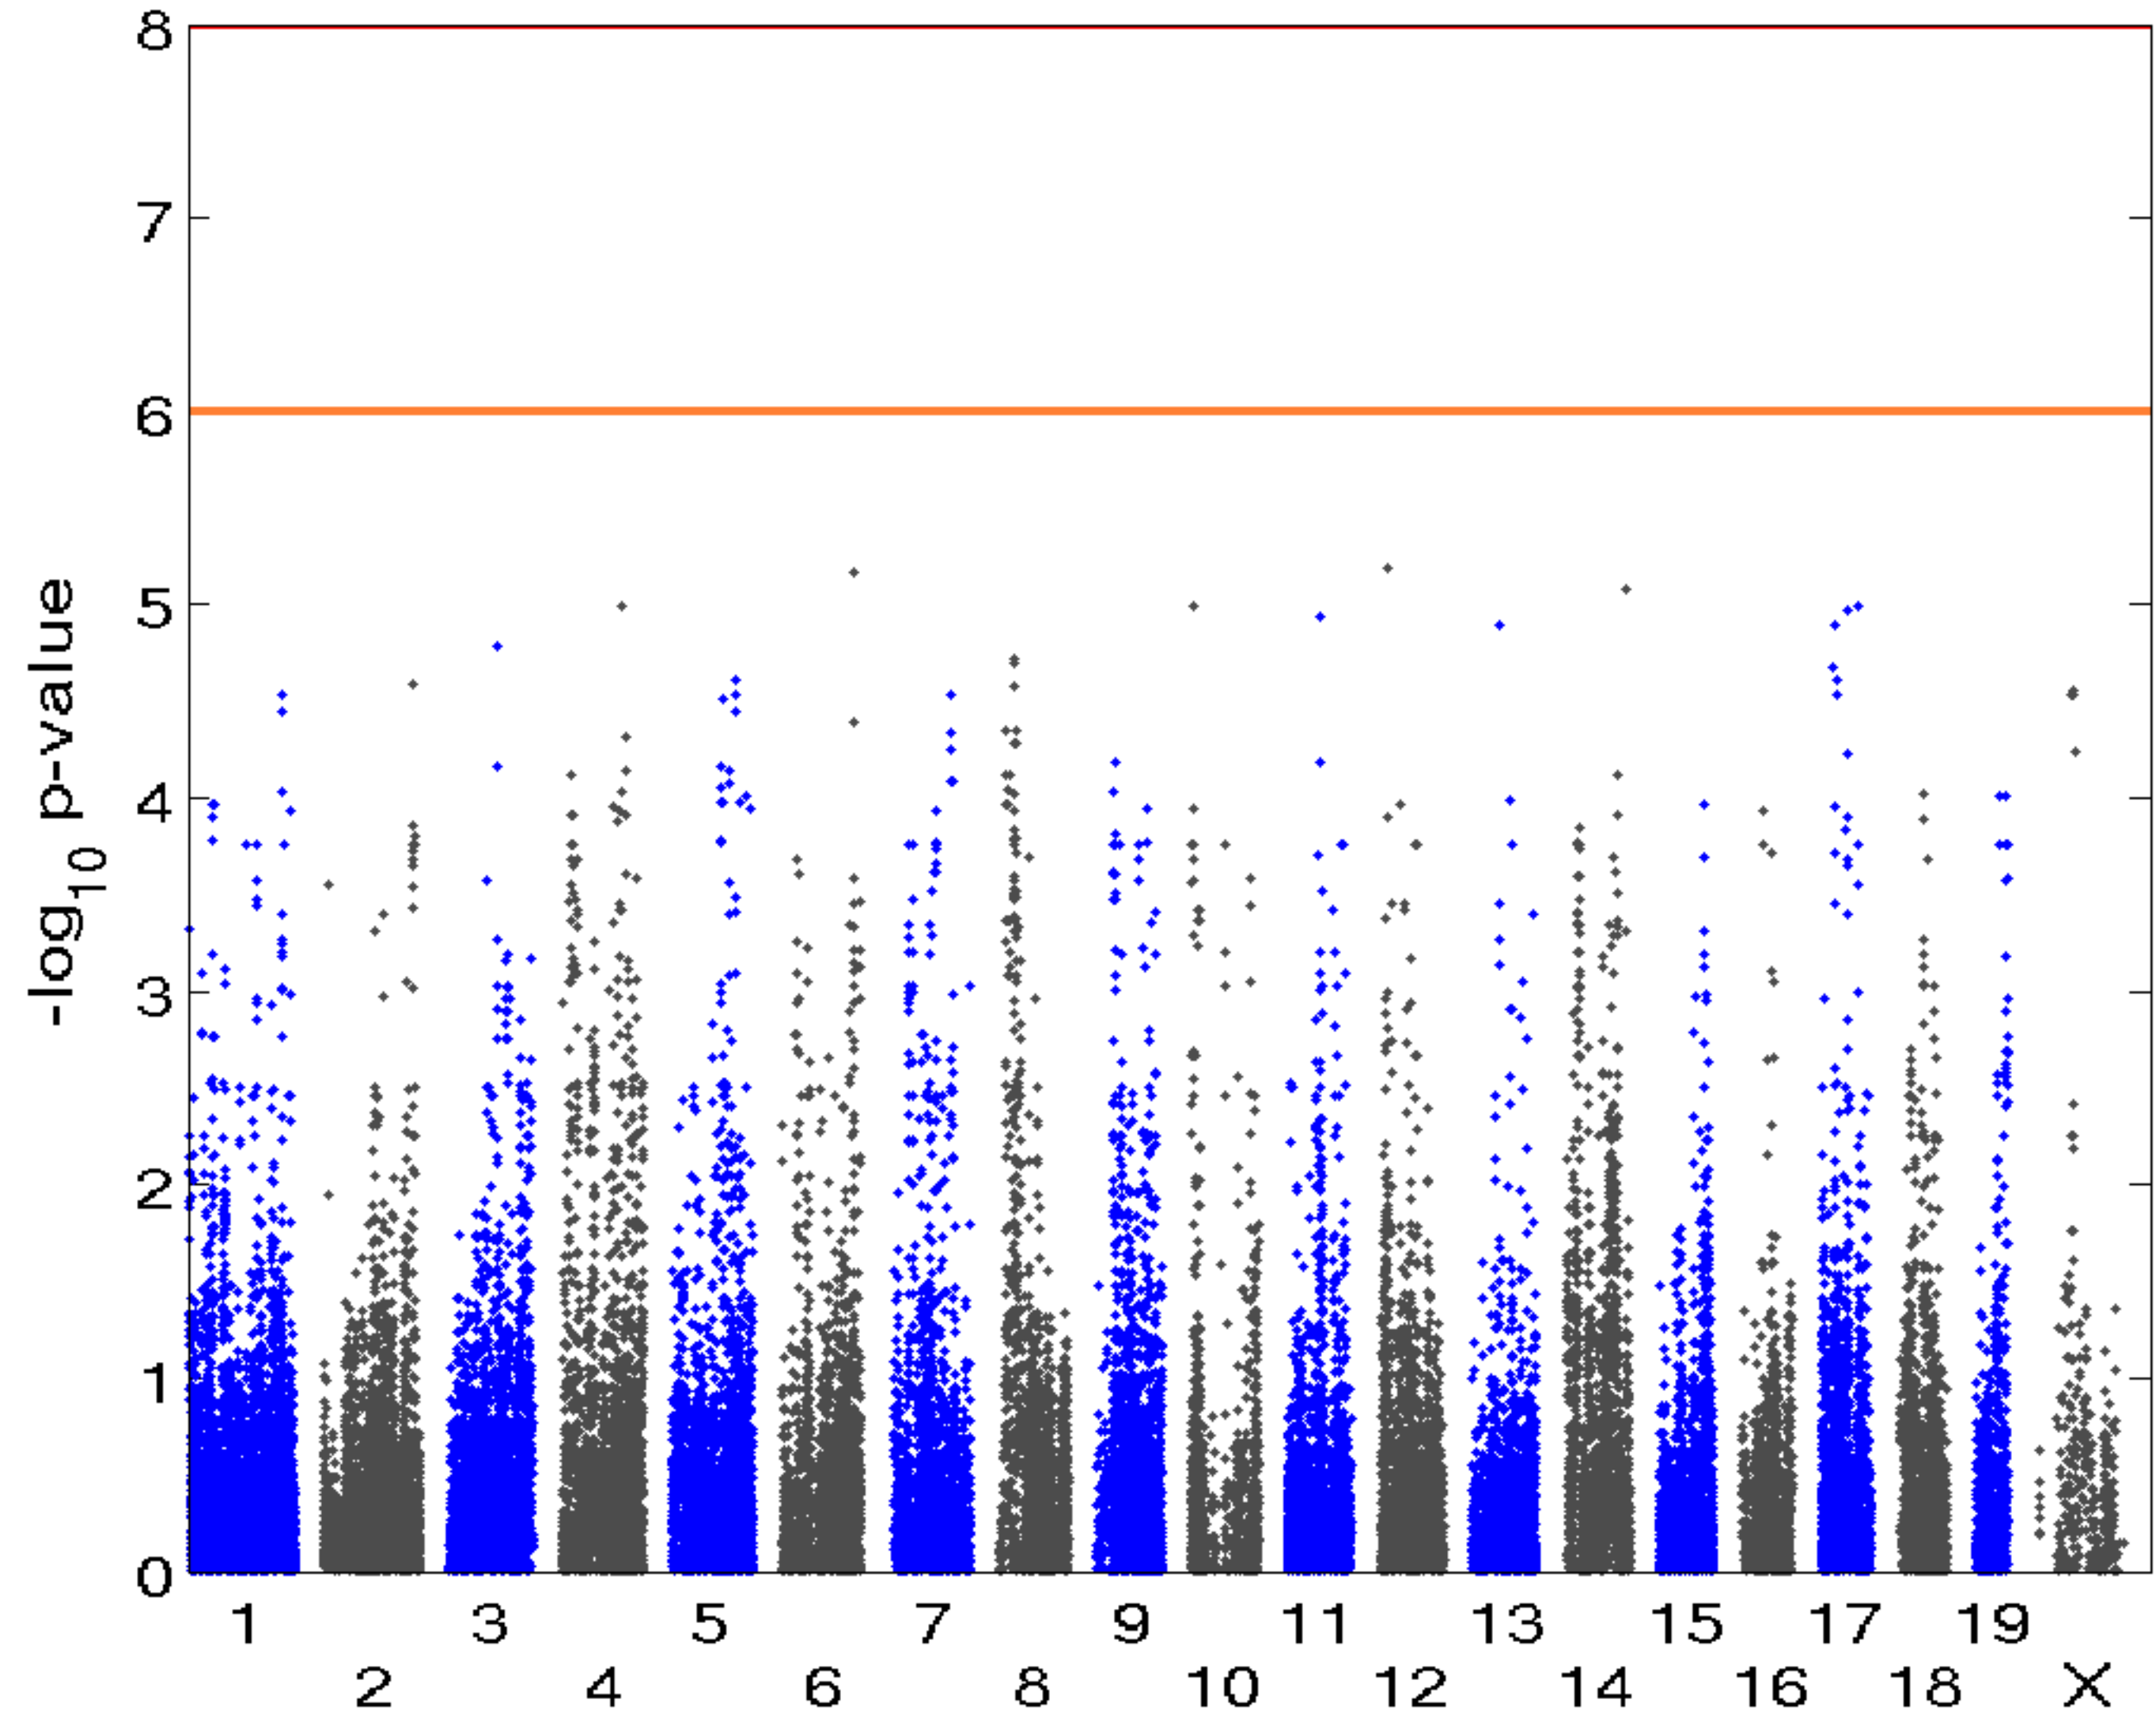

SBP - ate vs ctr

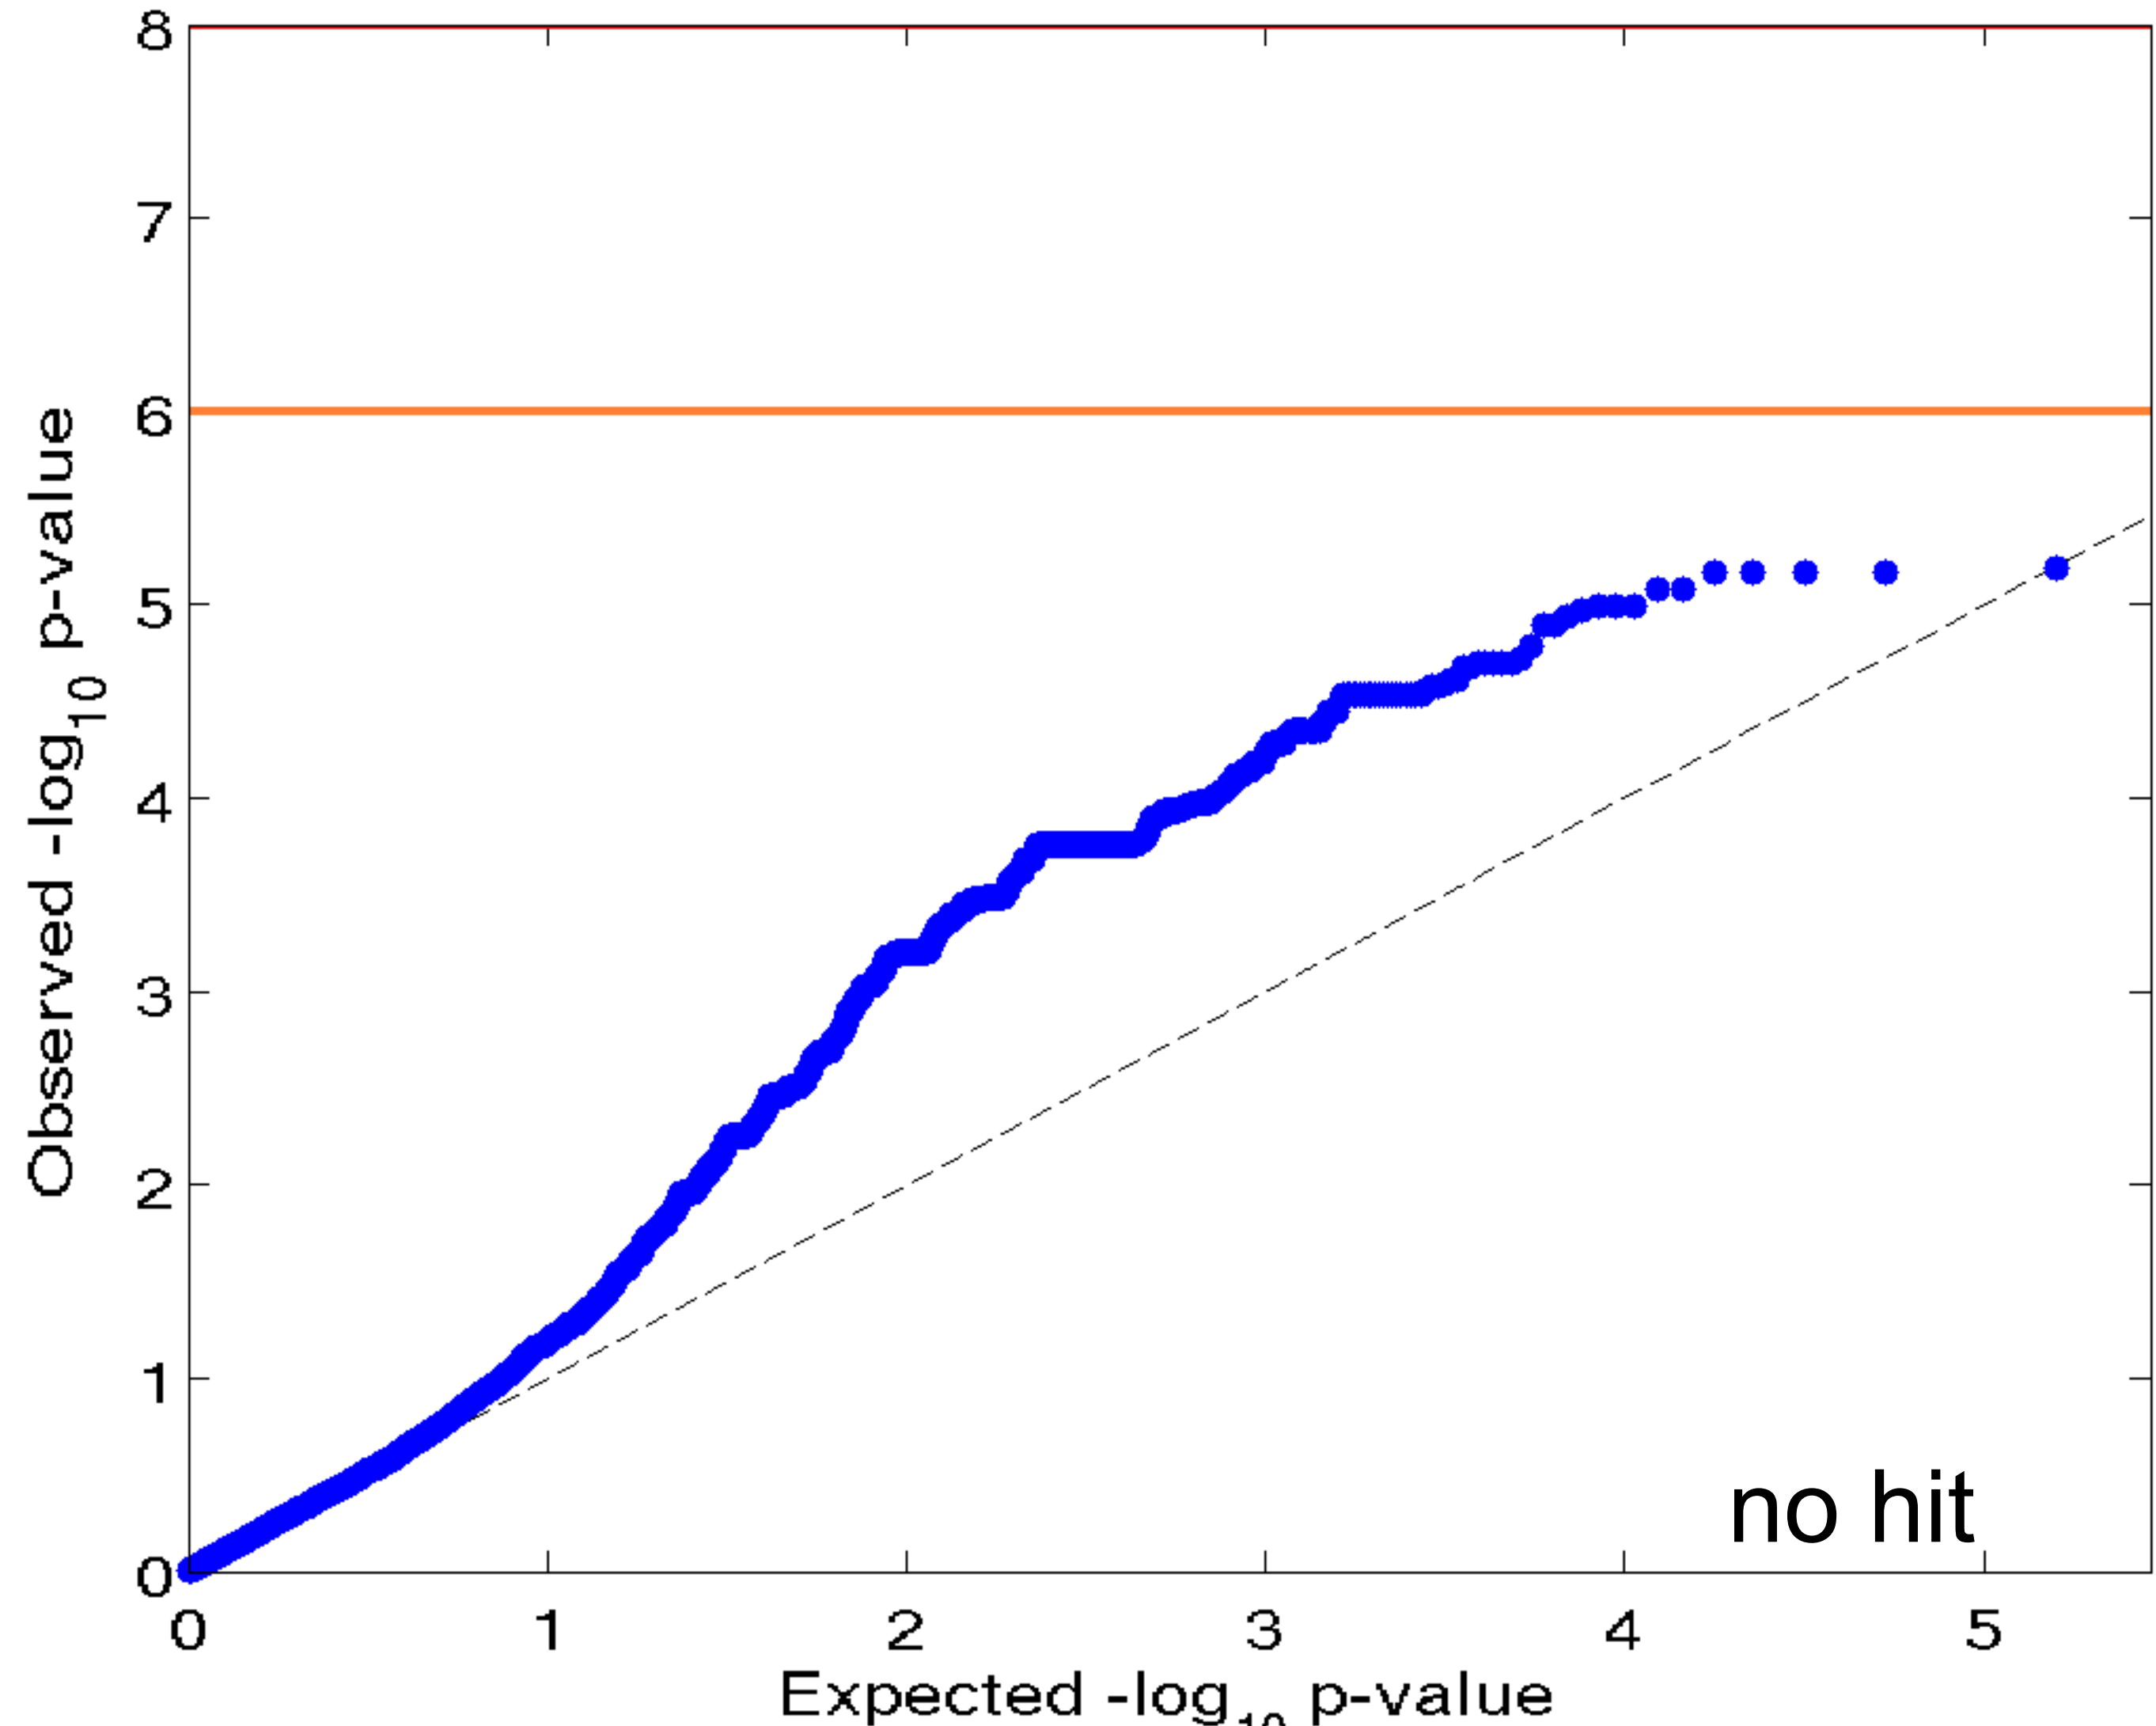



ST - ate vs ctr

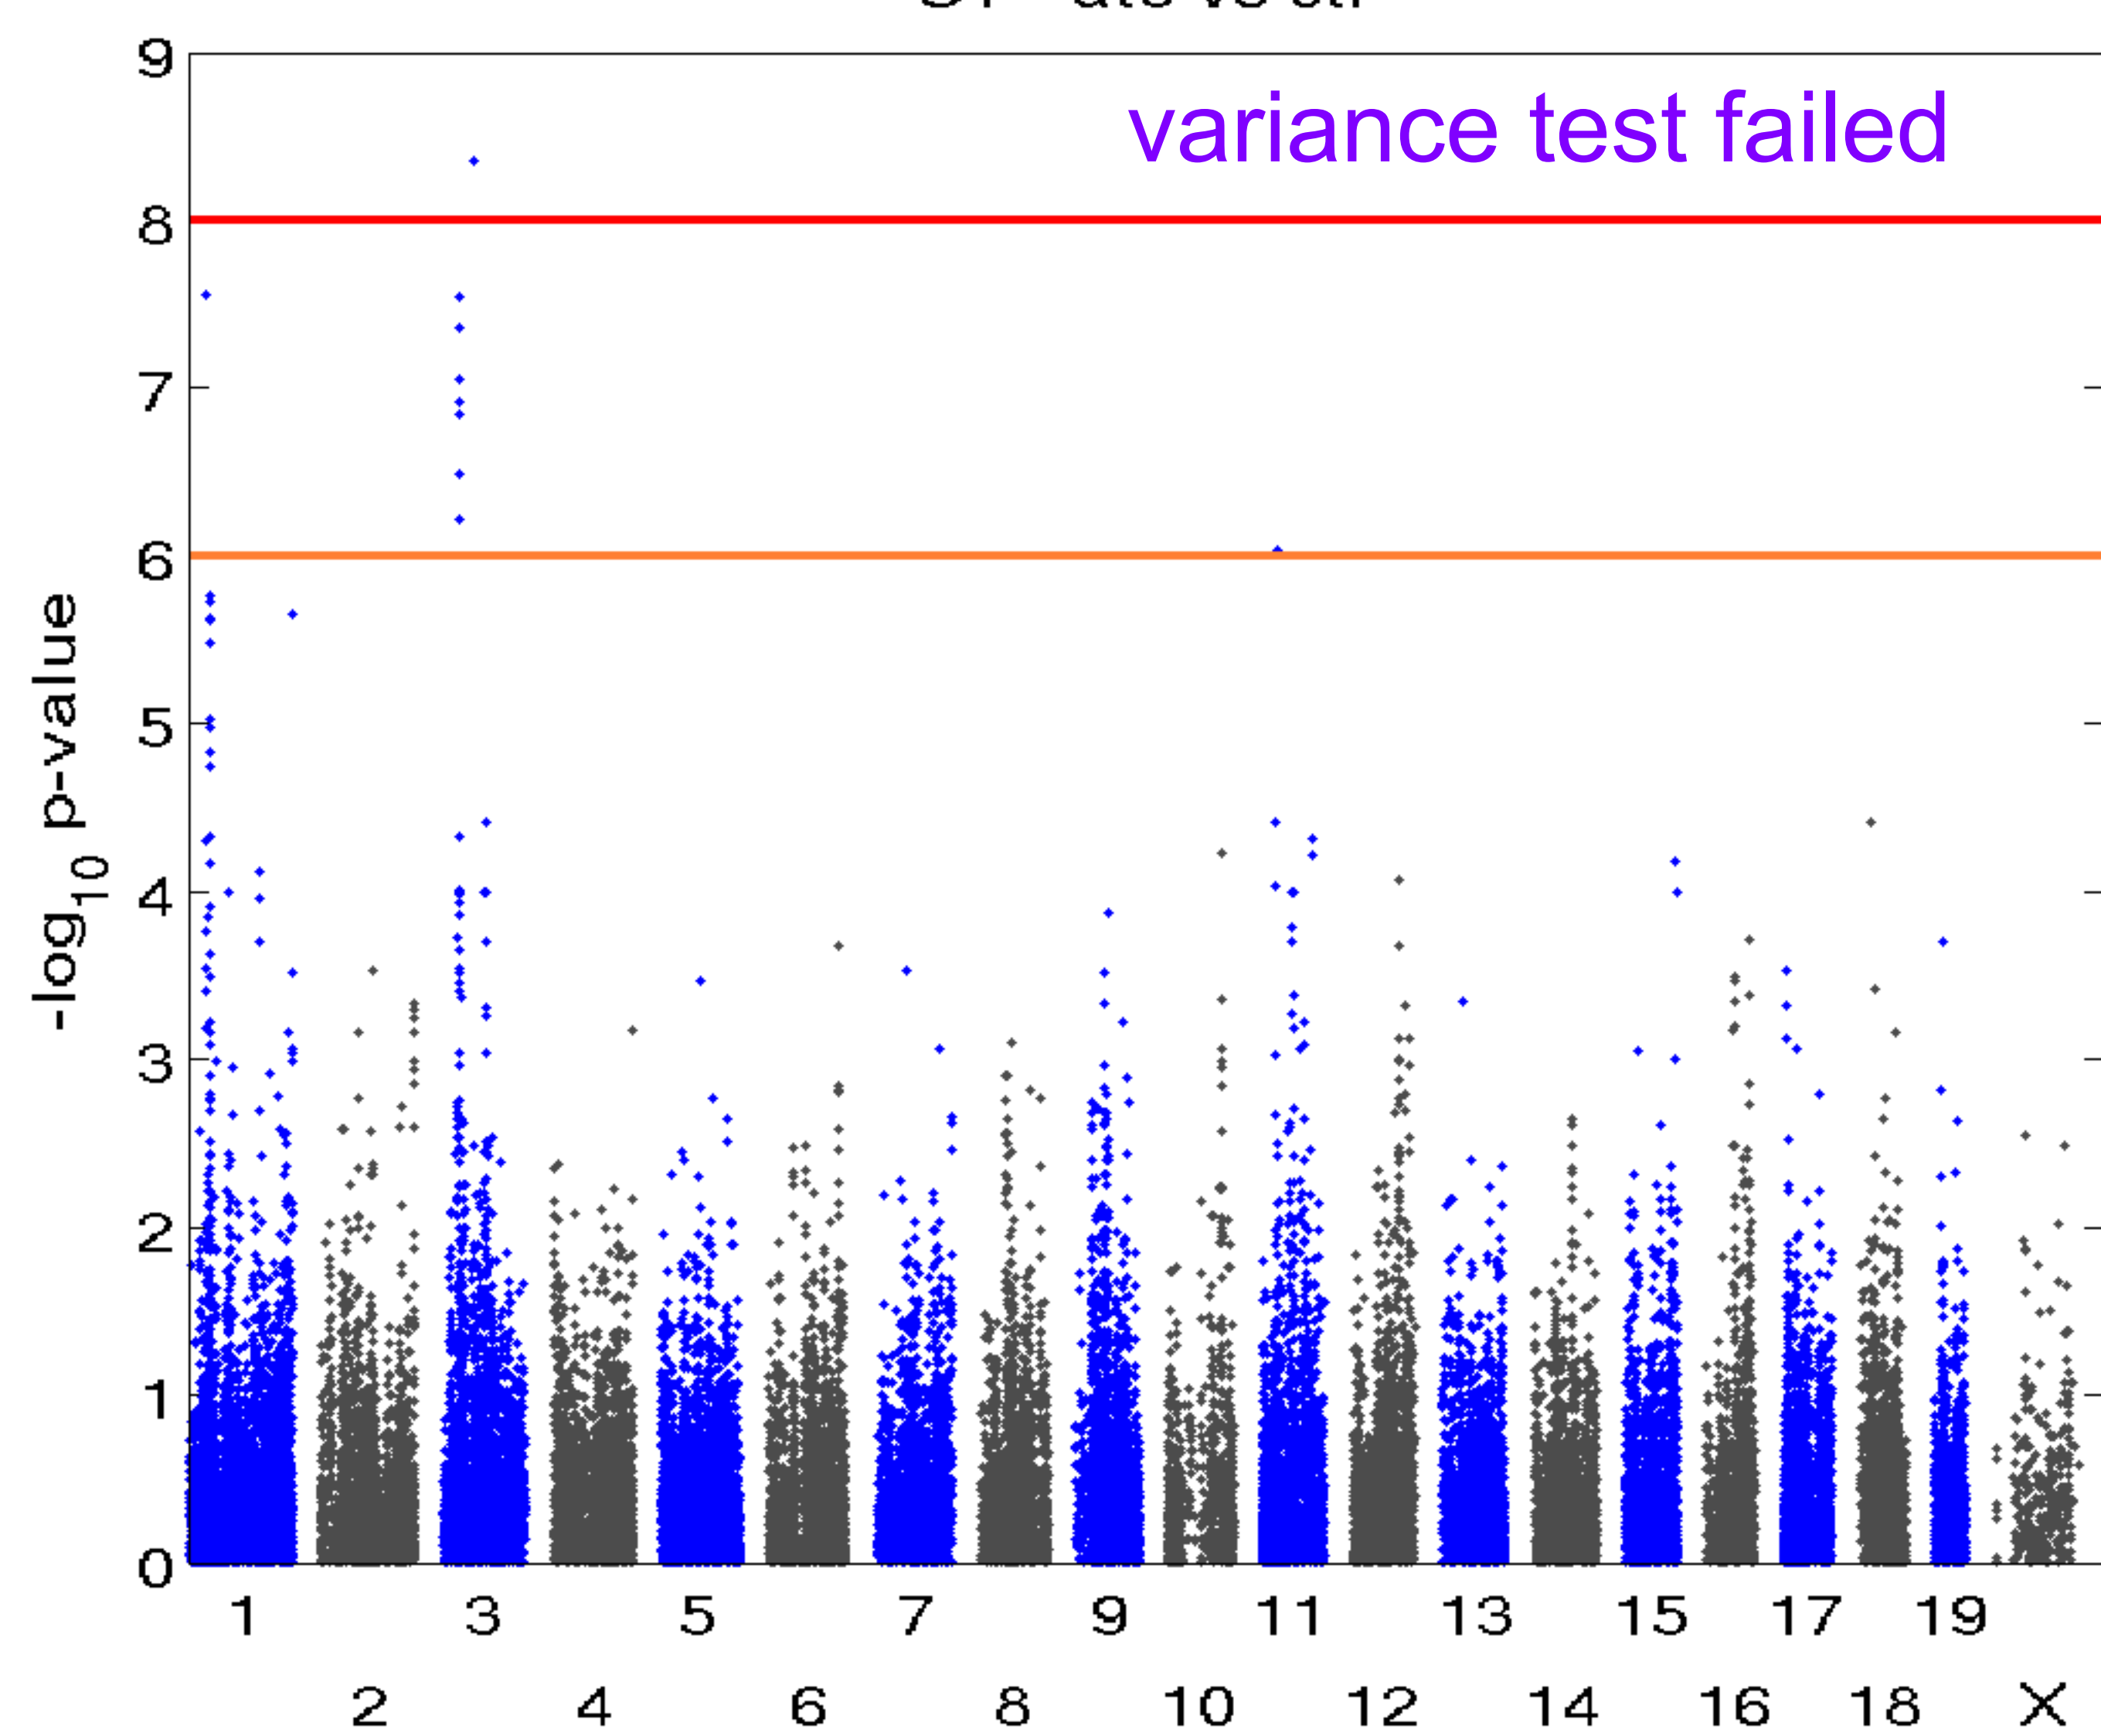

ST - ate vs ctr

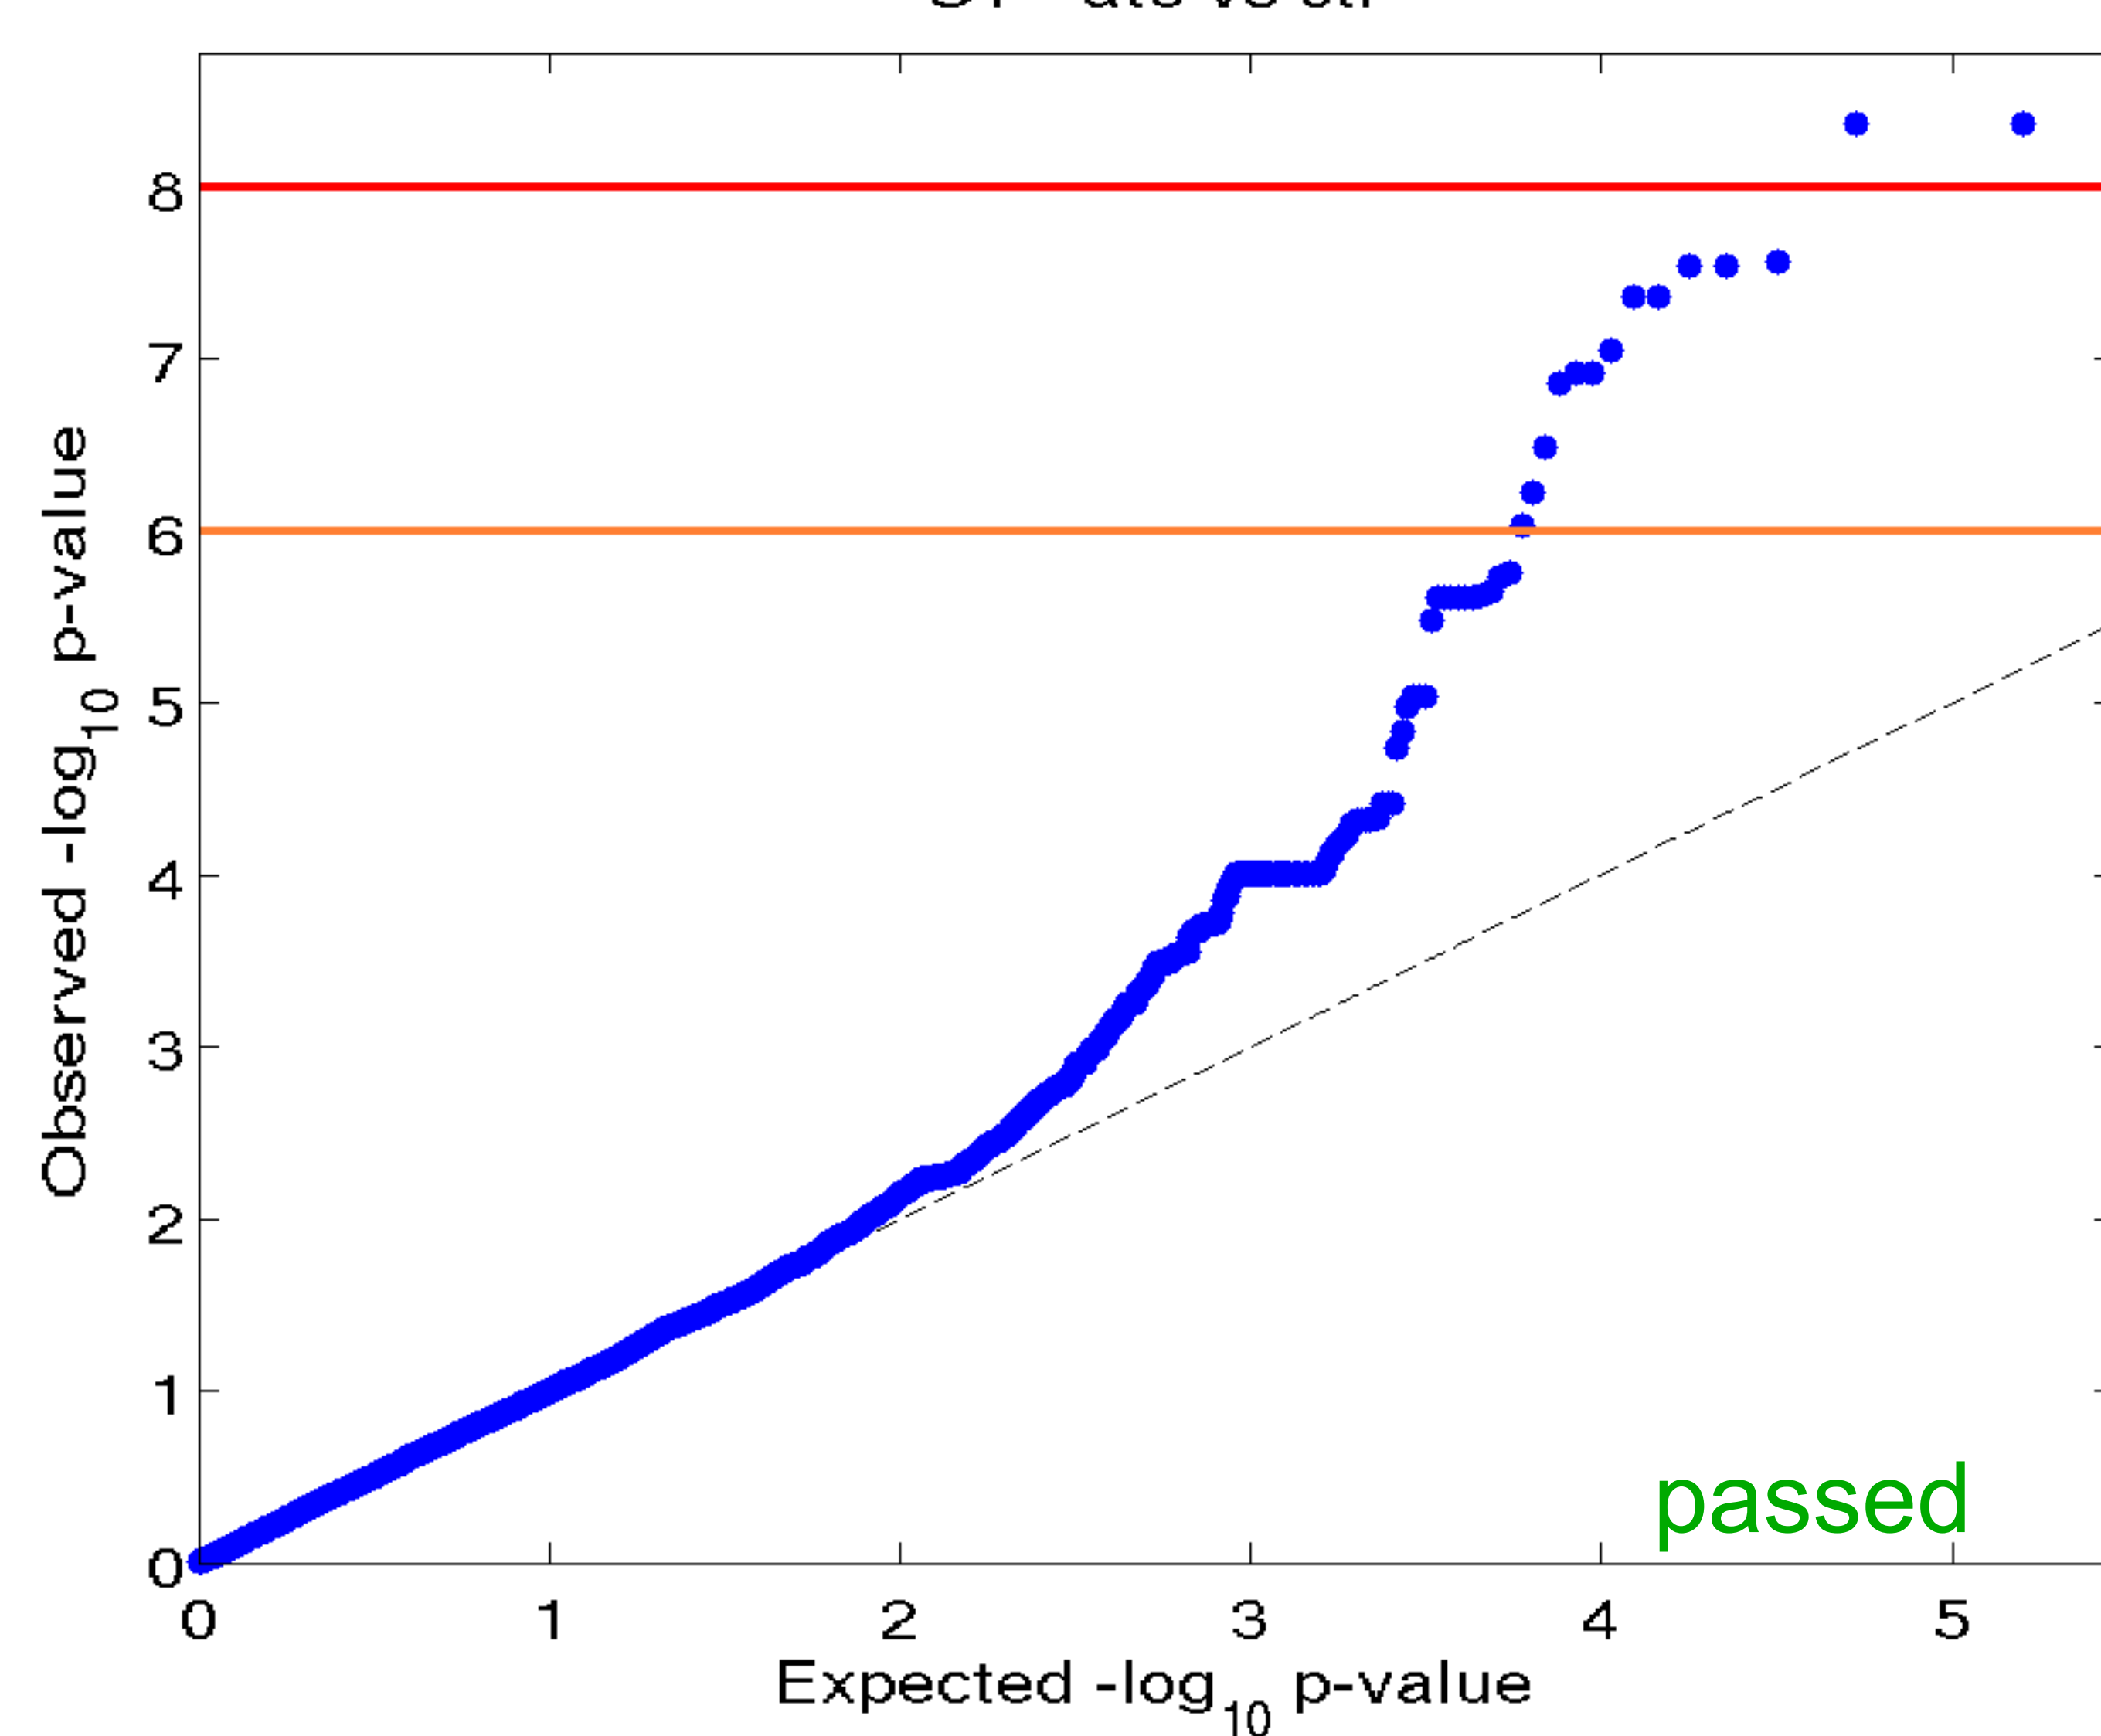

VW/AW - ate vs ctr

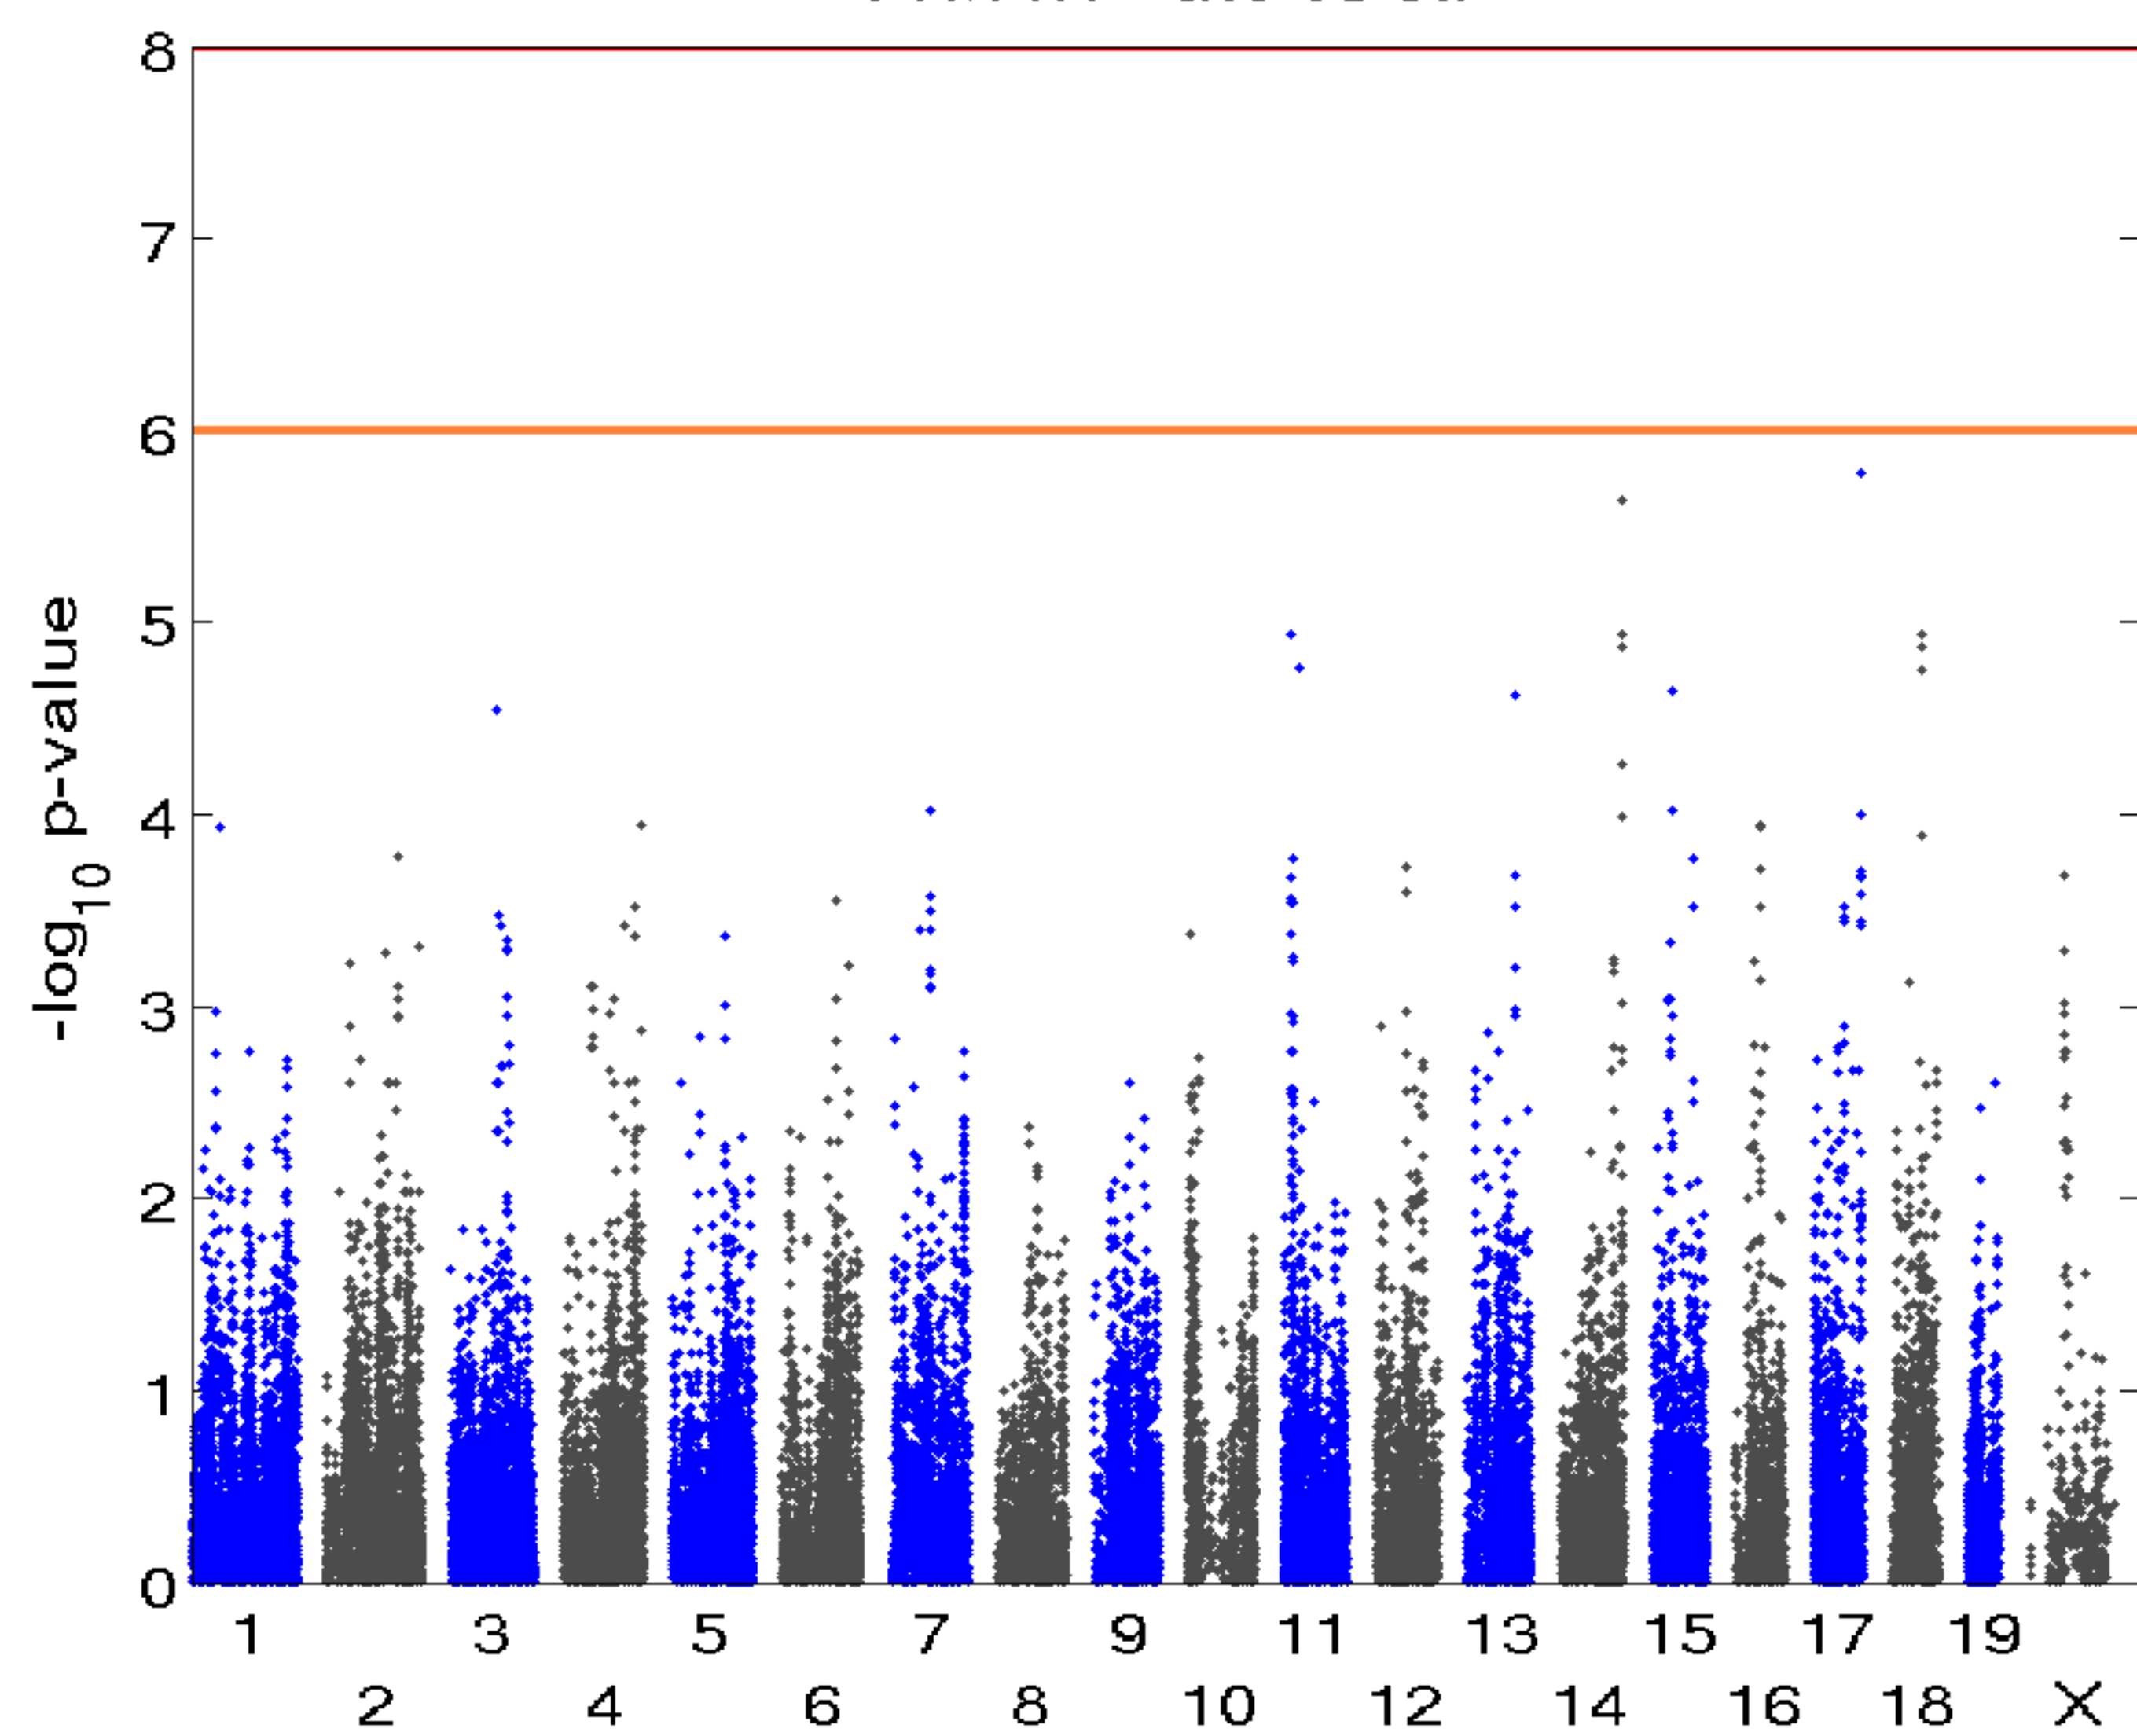

VW/AW - ate vs ctr

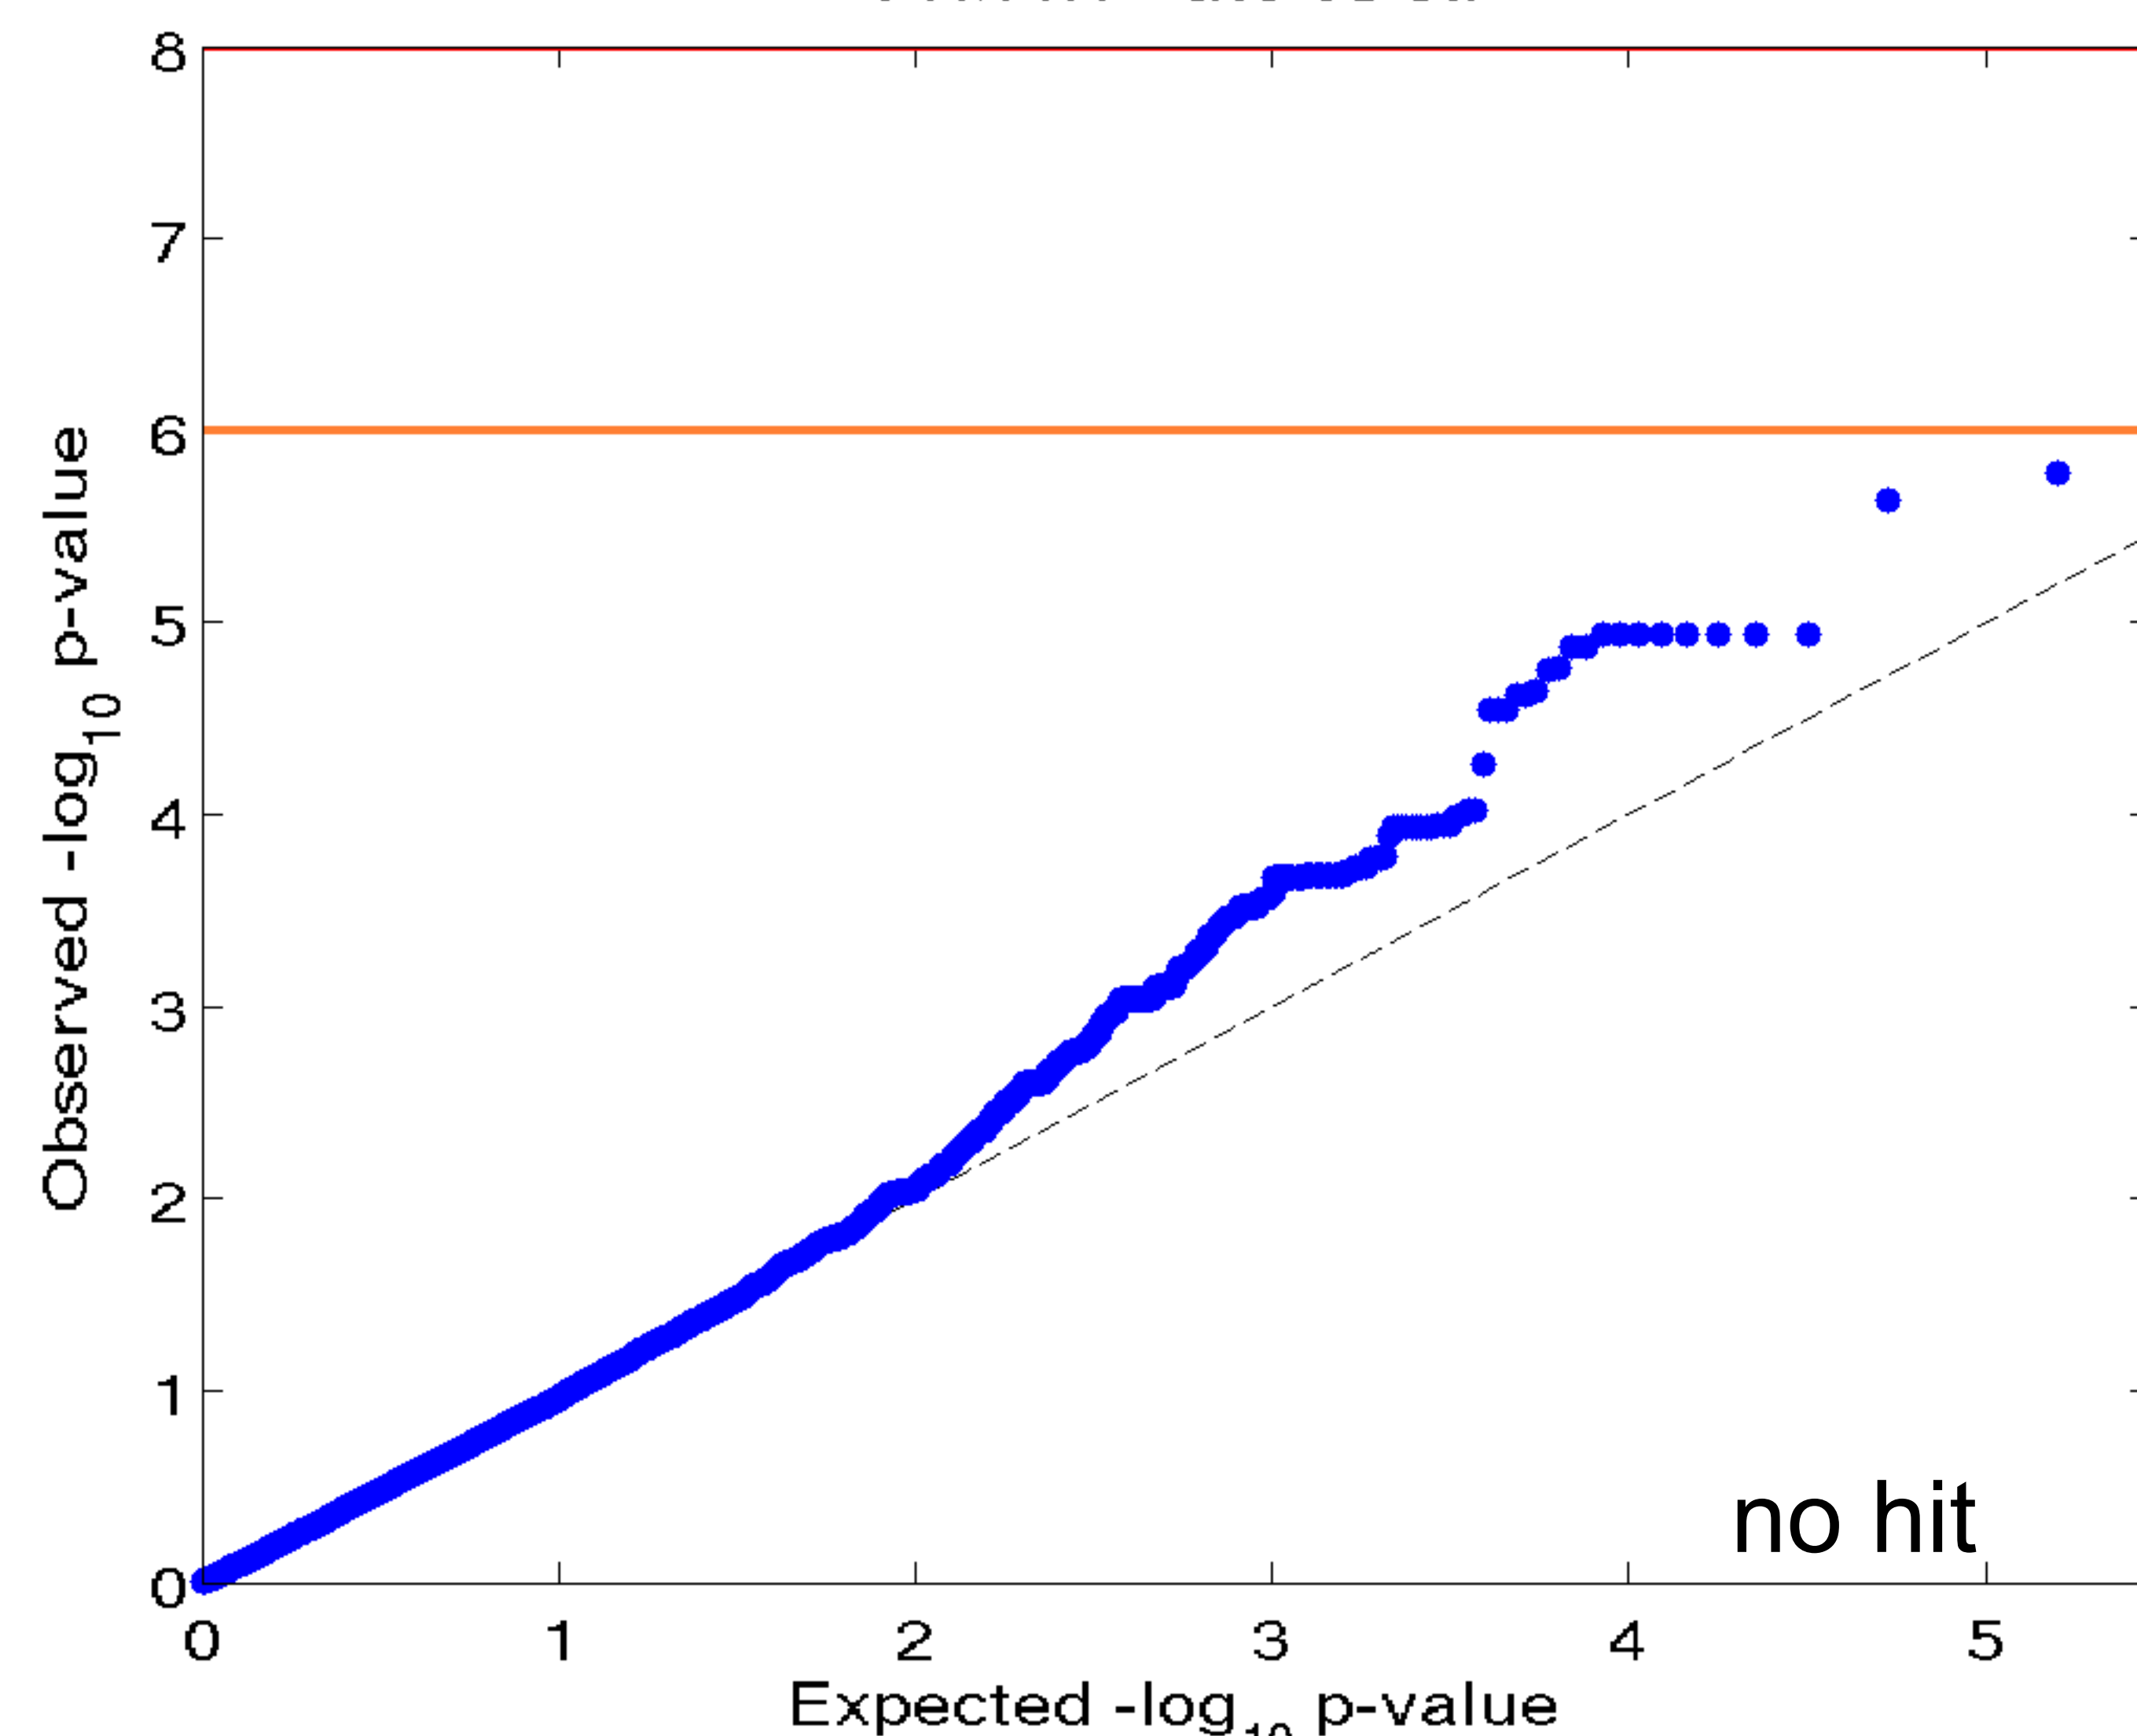

VW/BWS - ate vs ctr

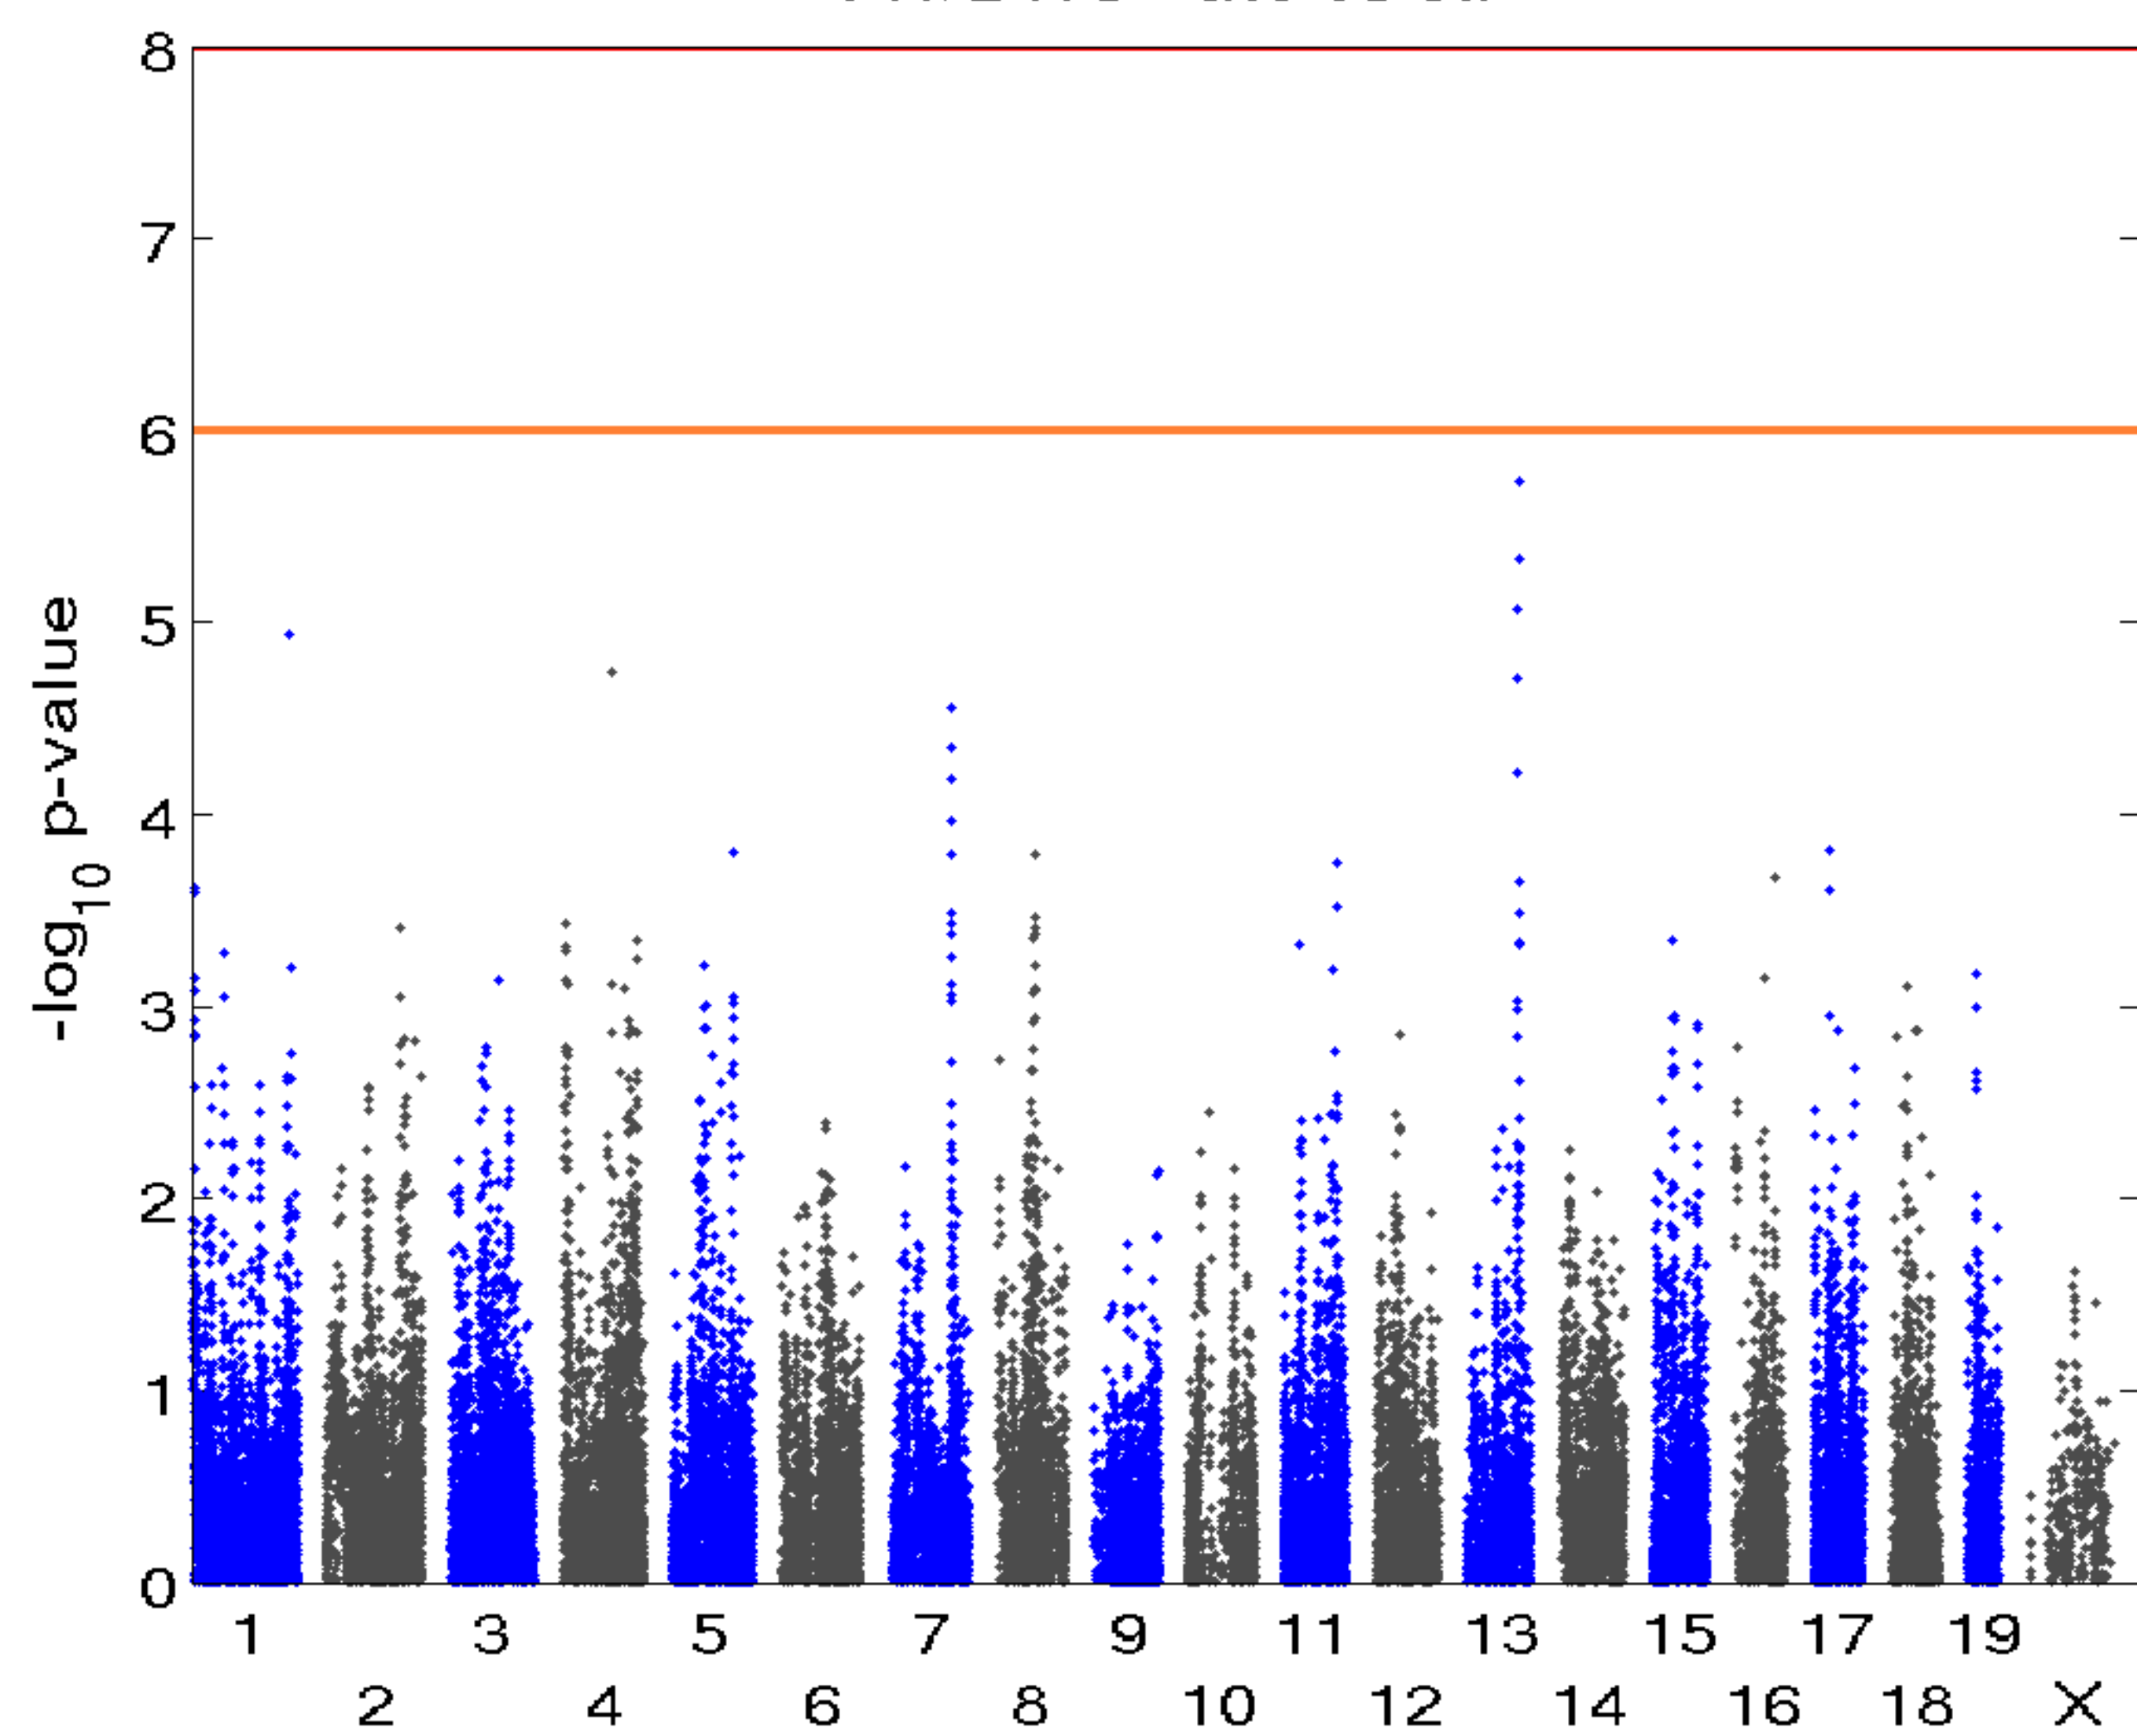

VW/BWS - ate vs ctr

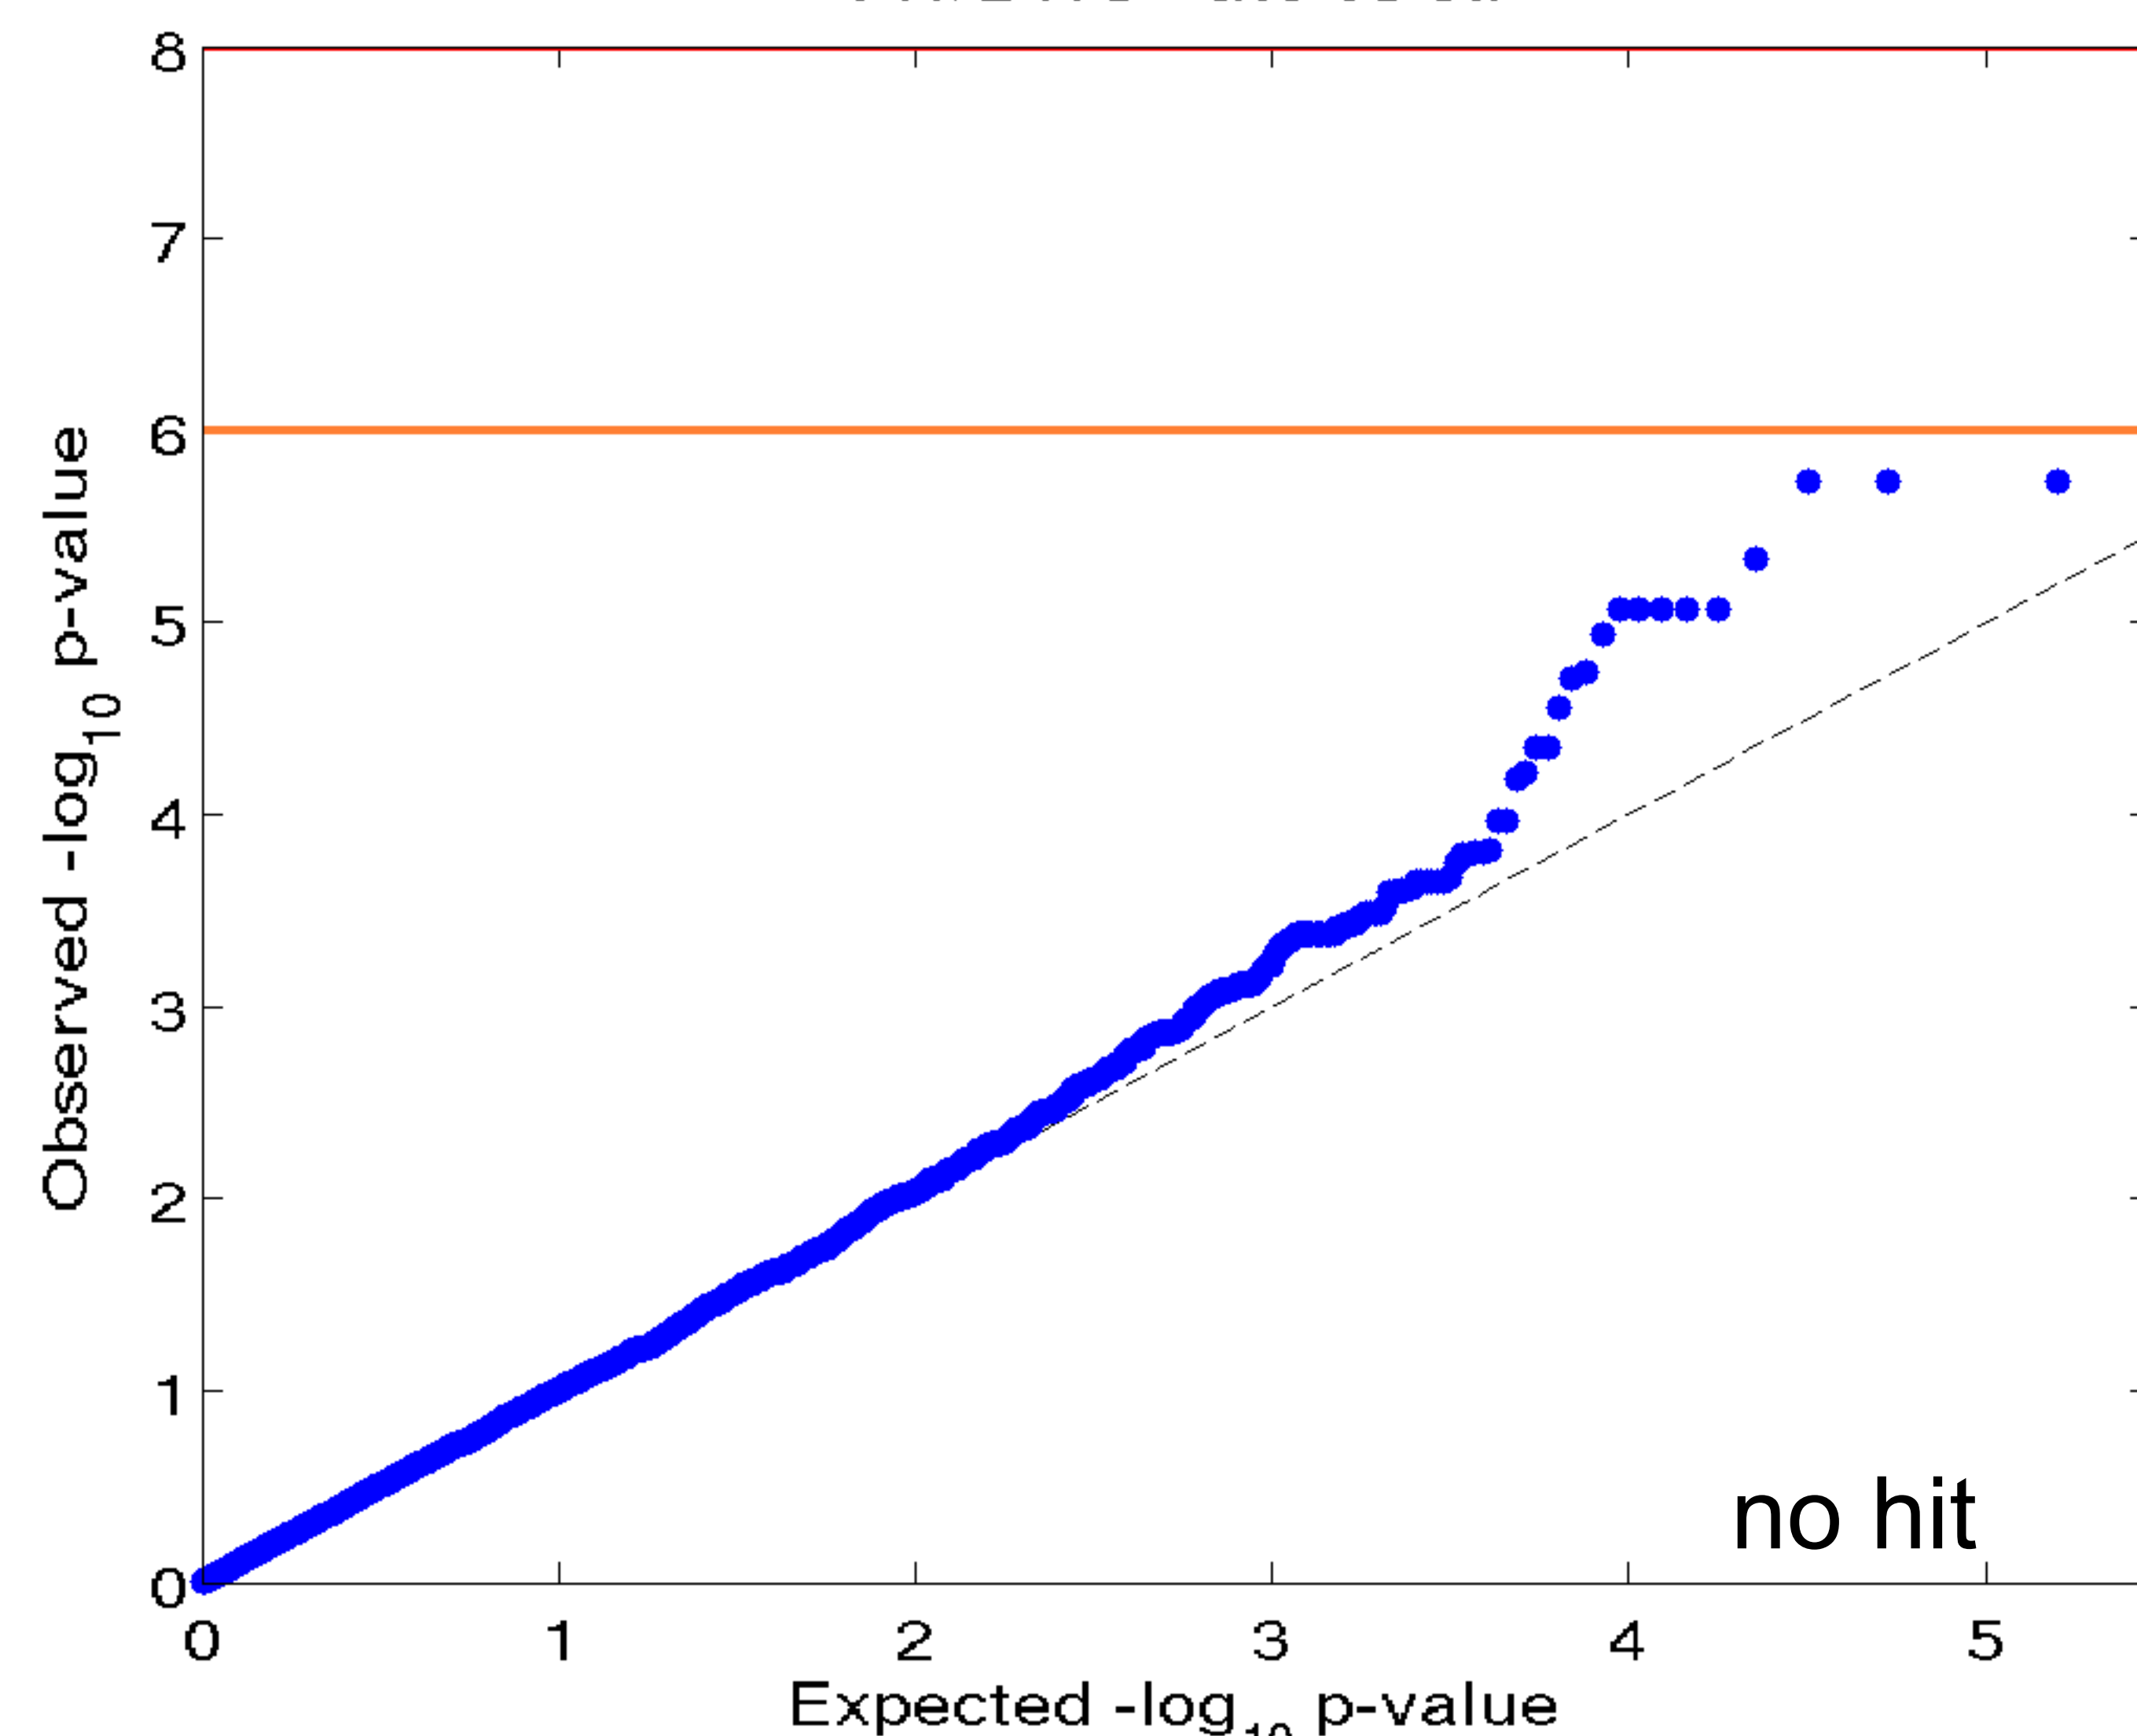

VWI - ate vs ctr

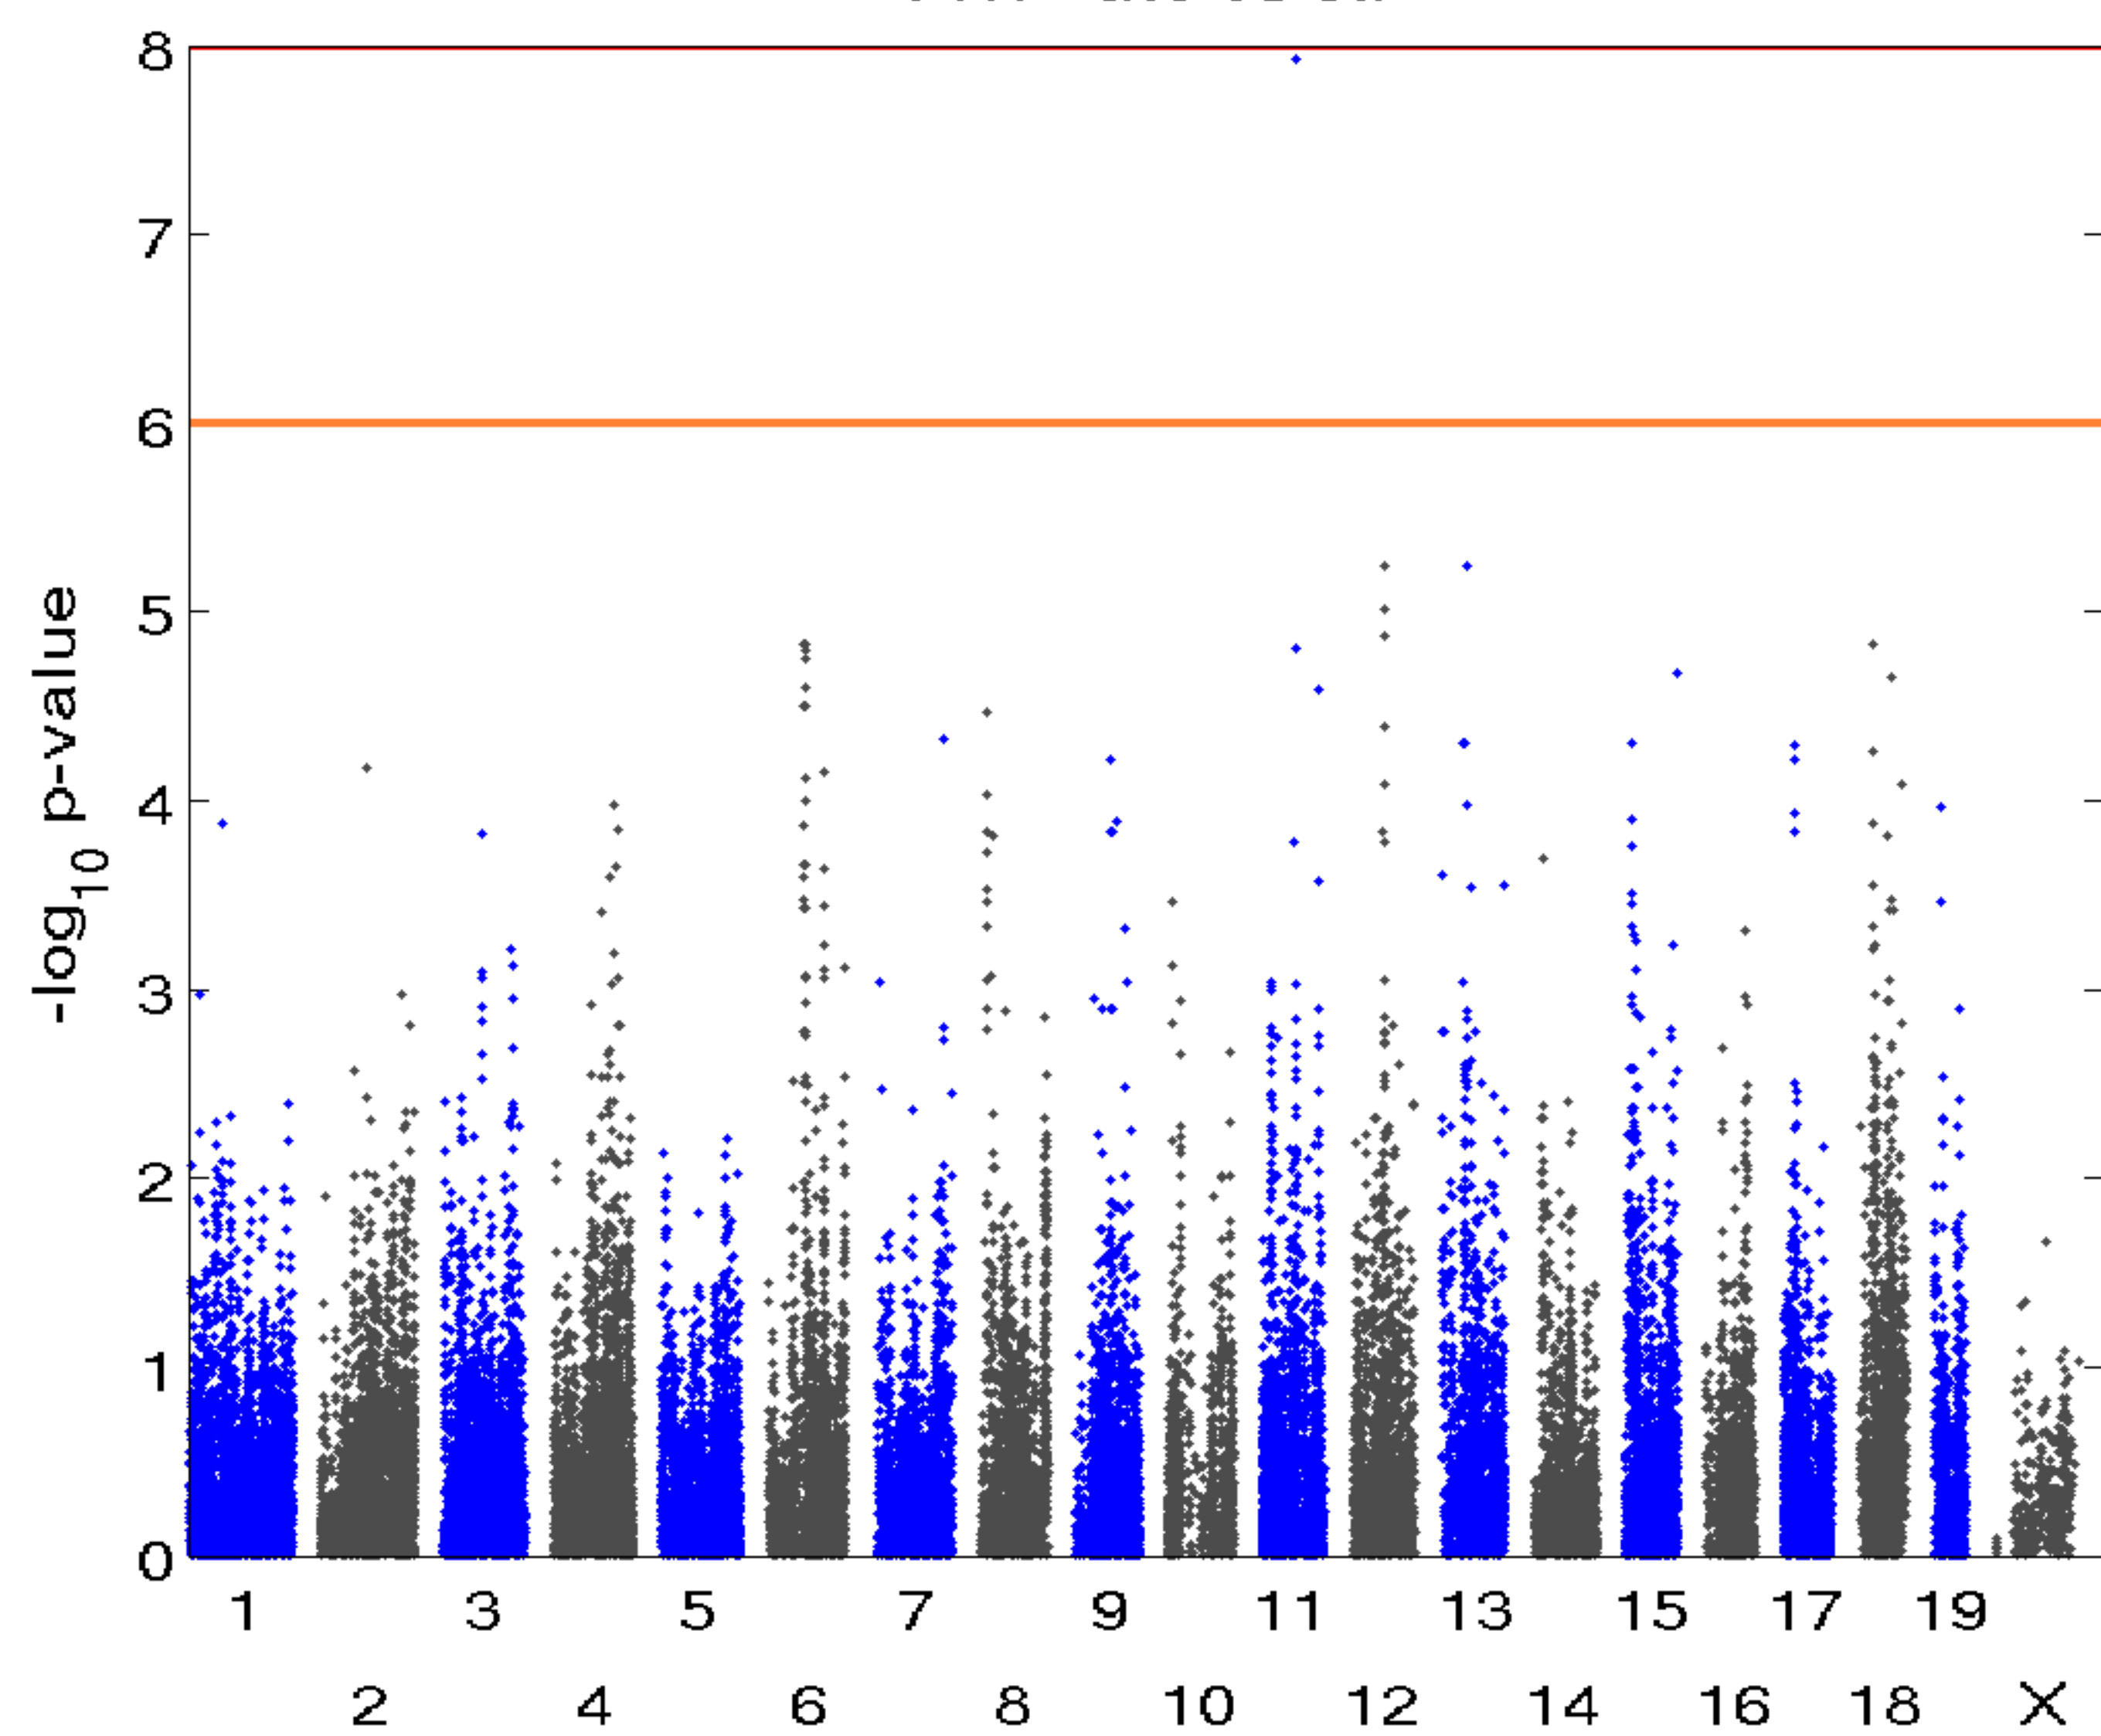

VWI - ate vs ctr

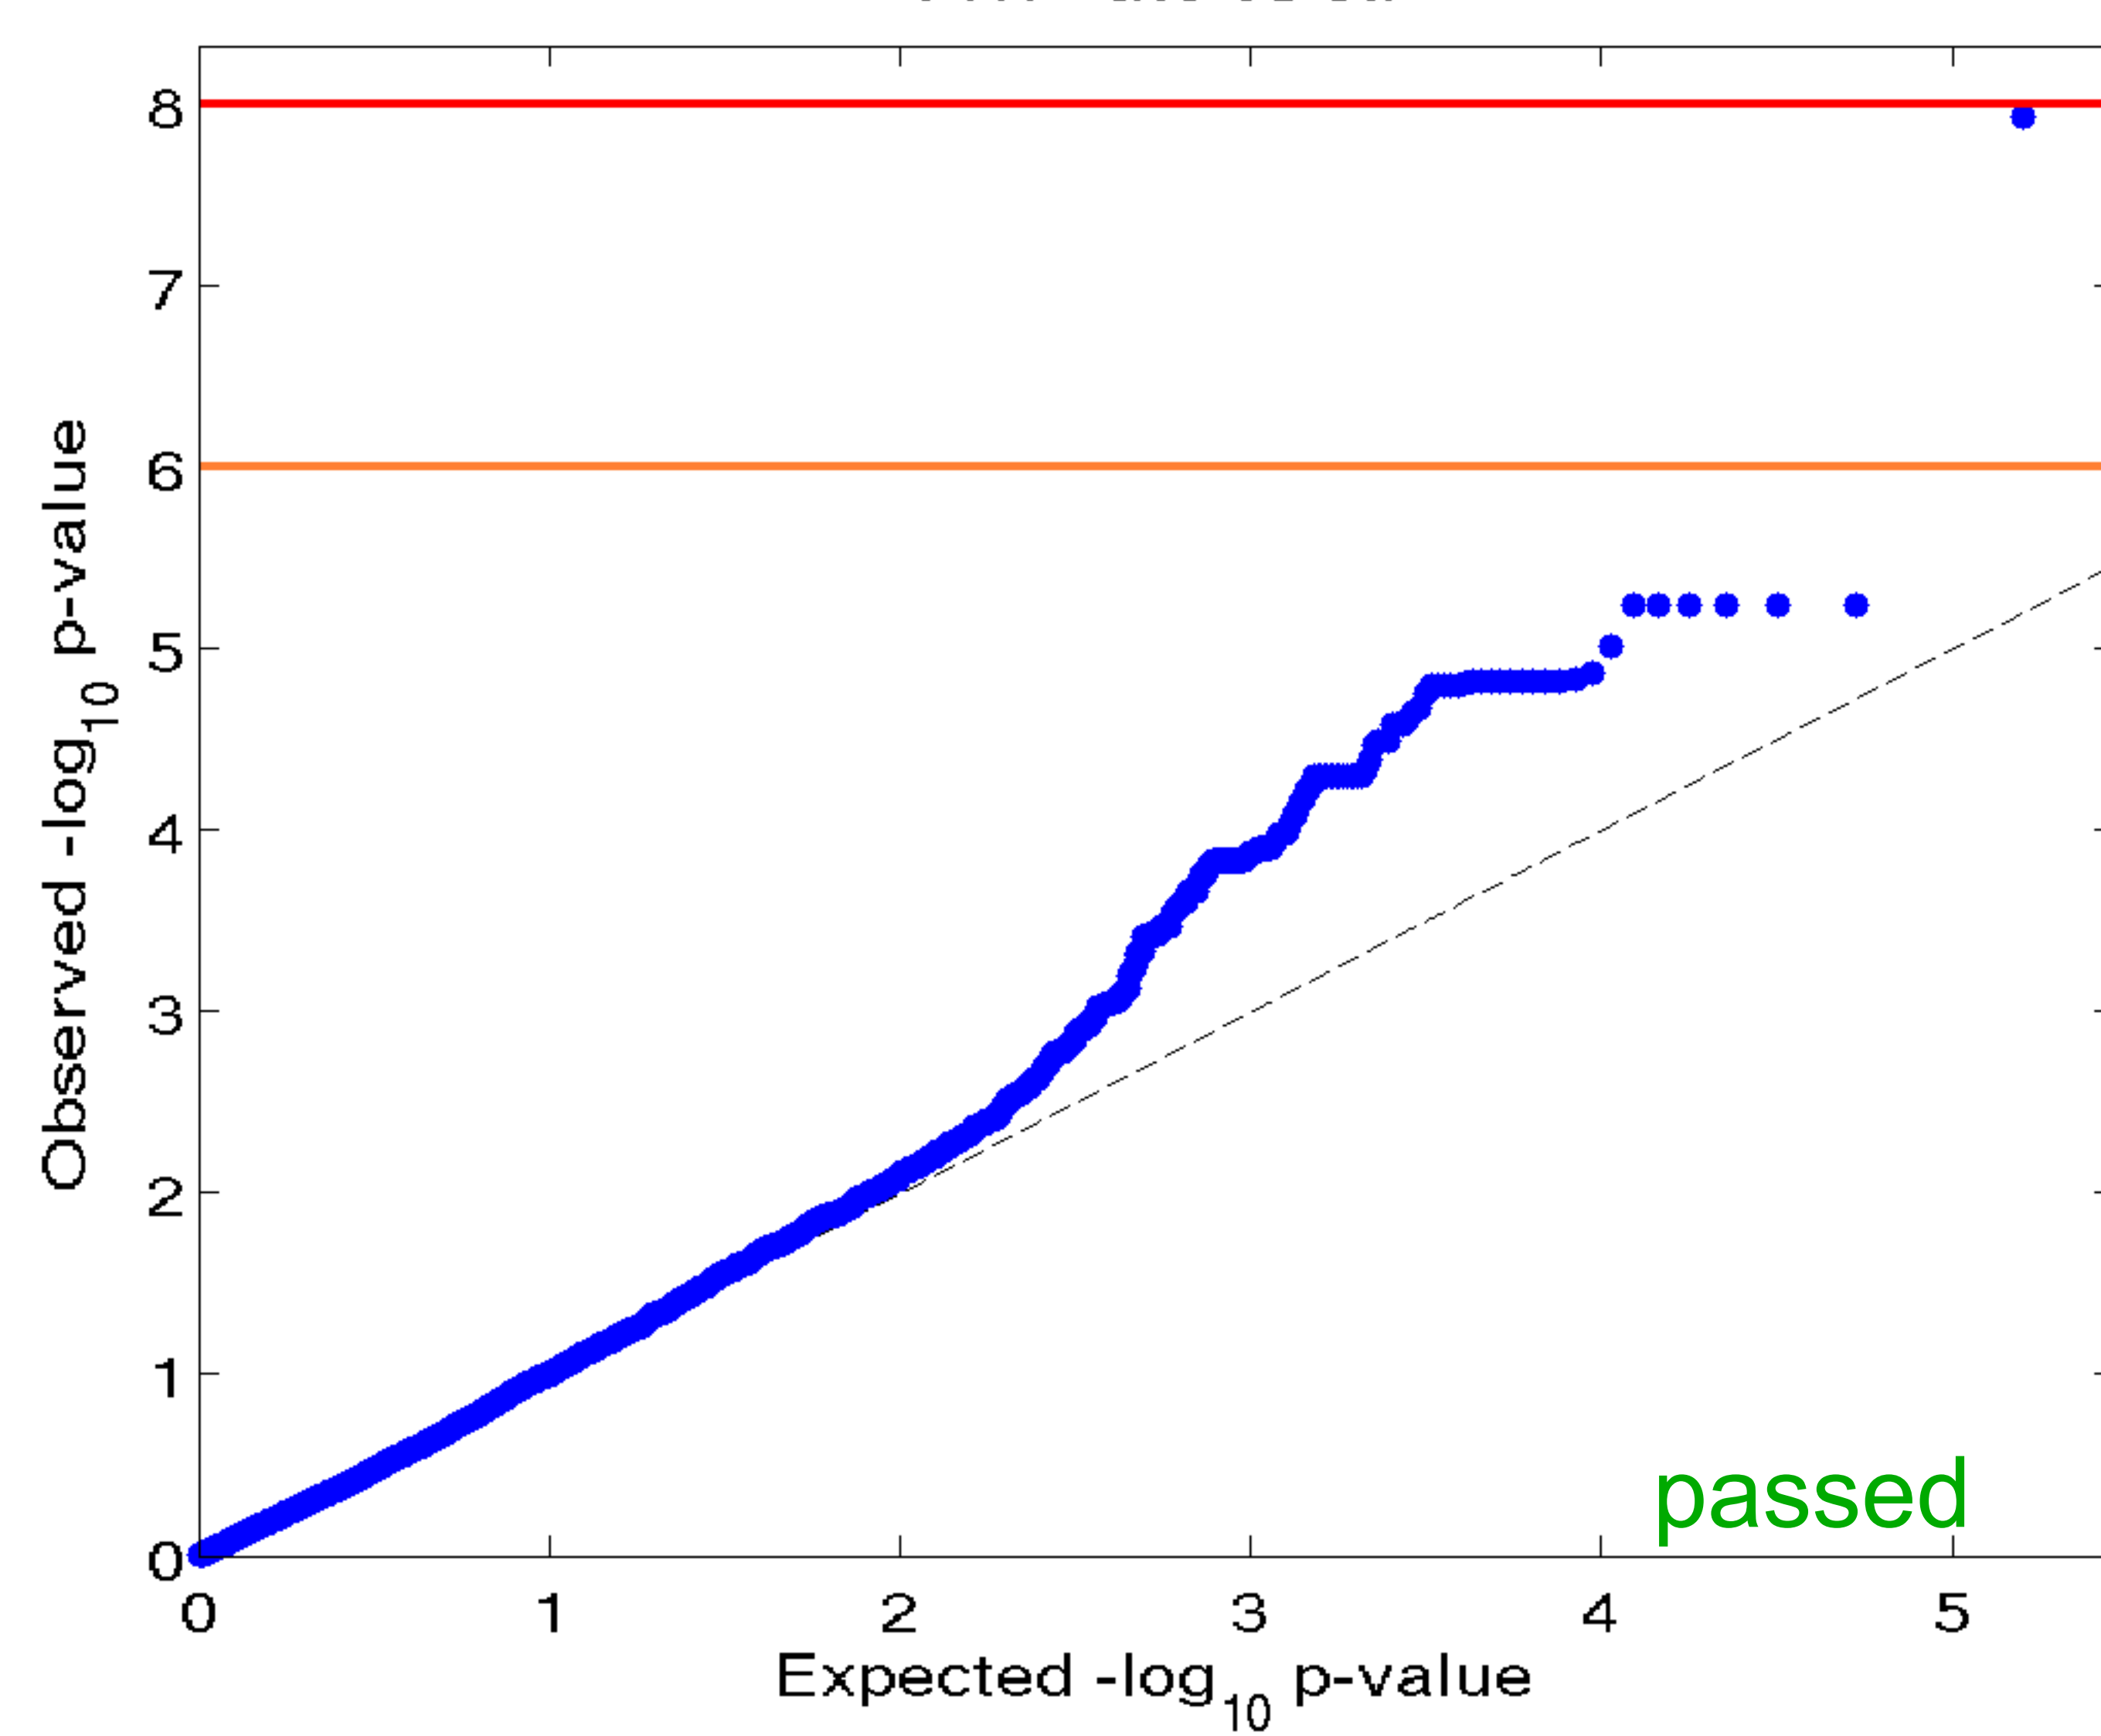

VW - ate vs ctr

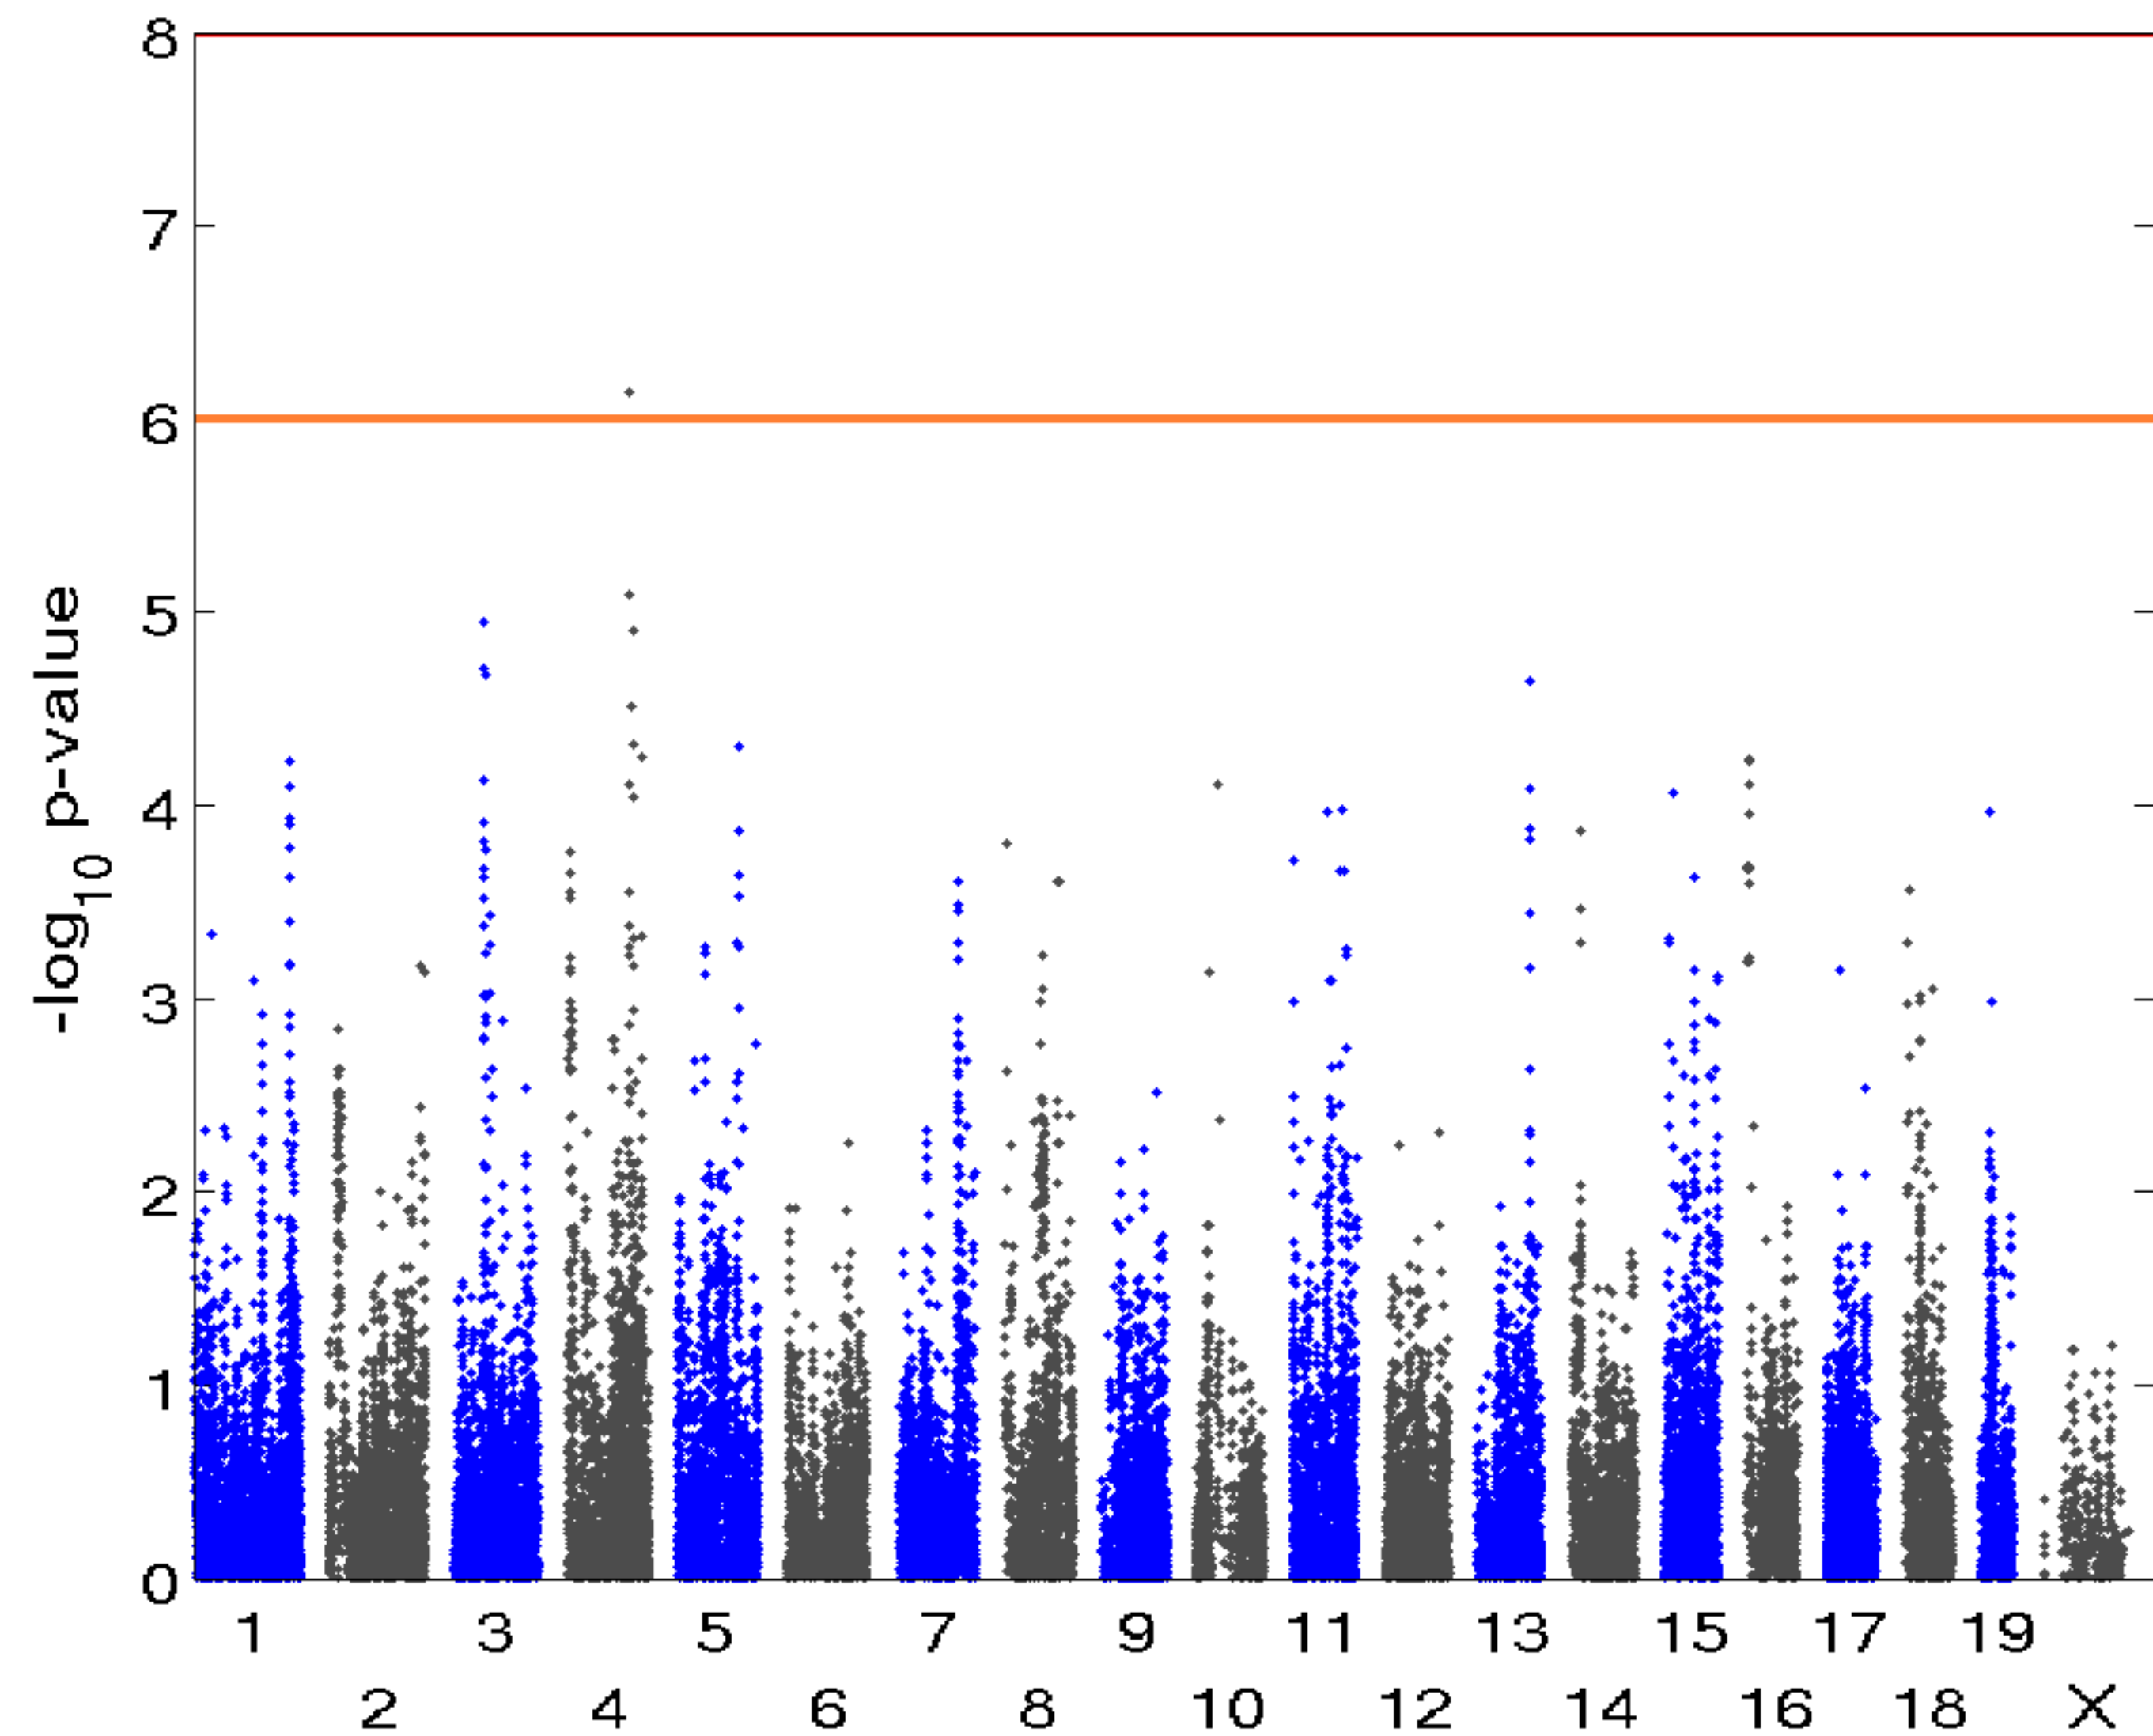

VW - ate vs ctr

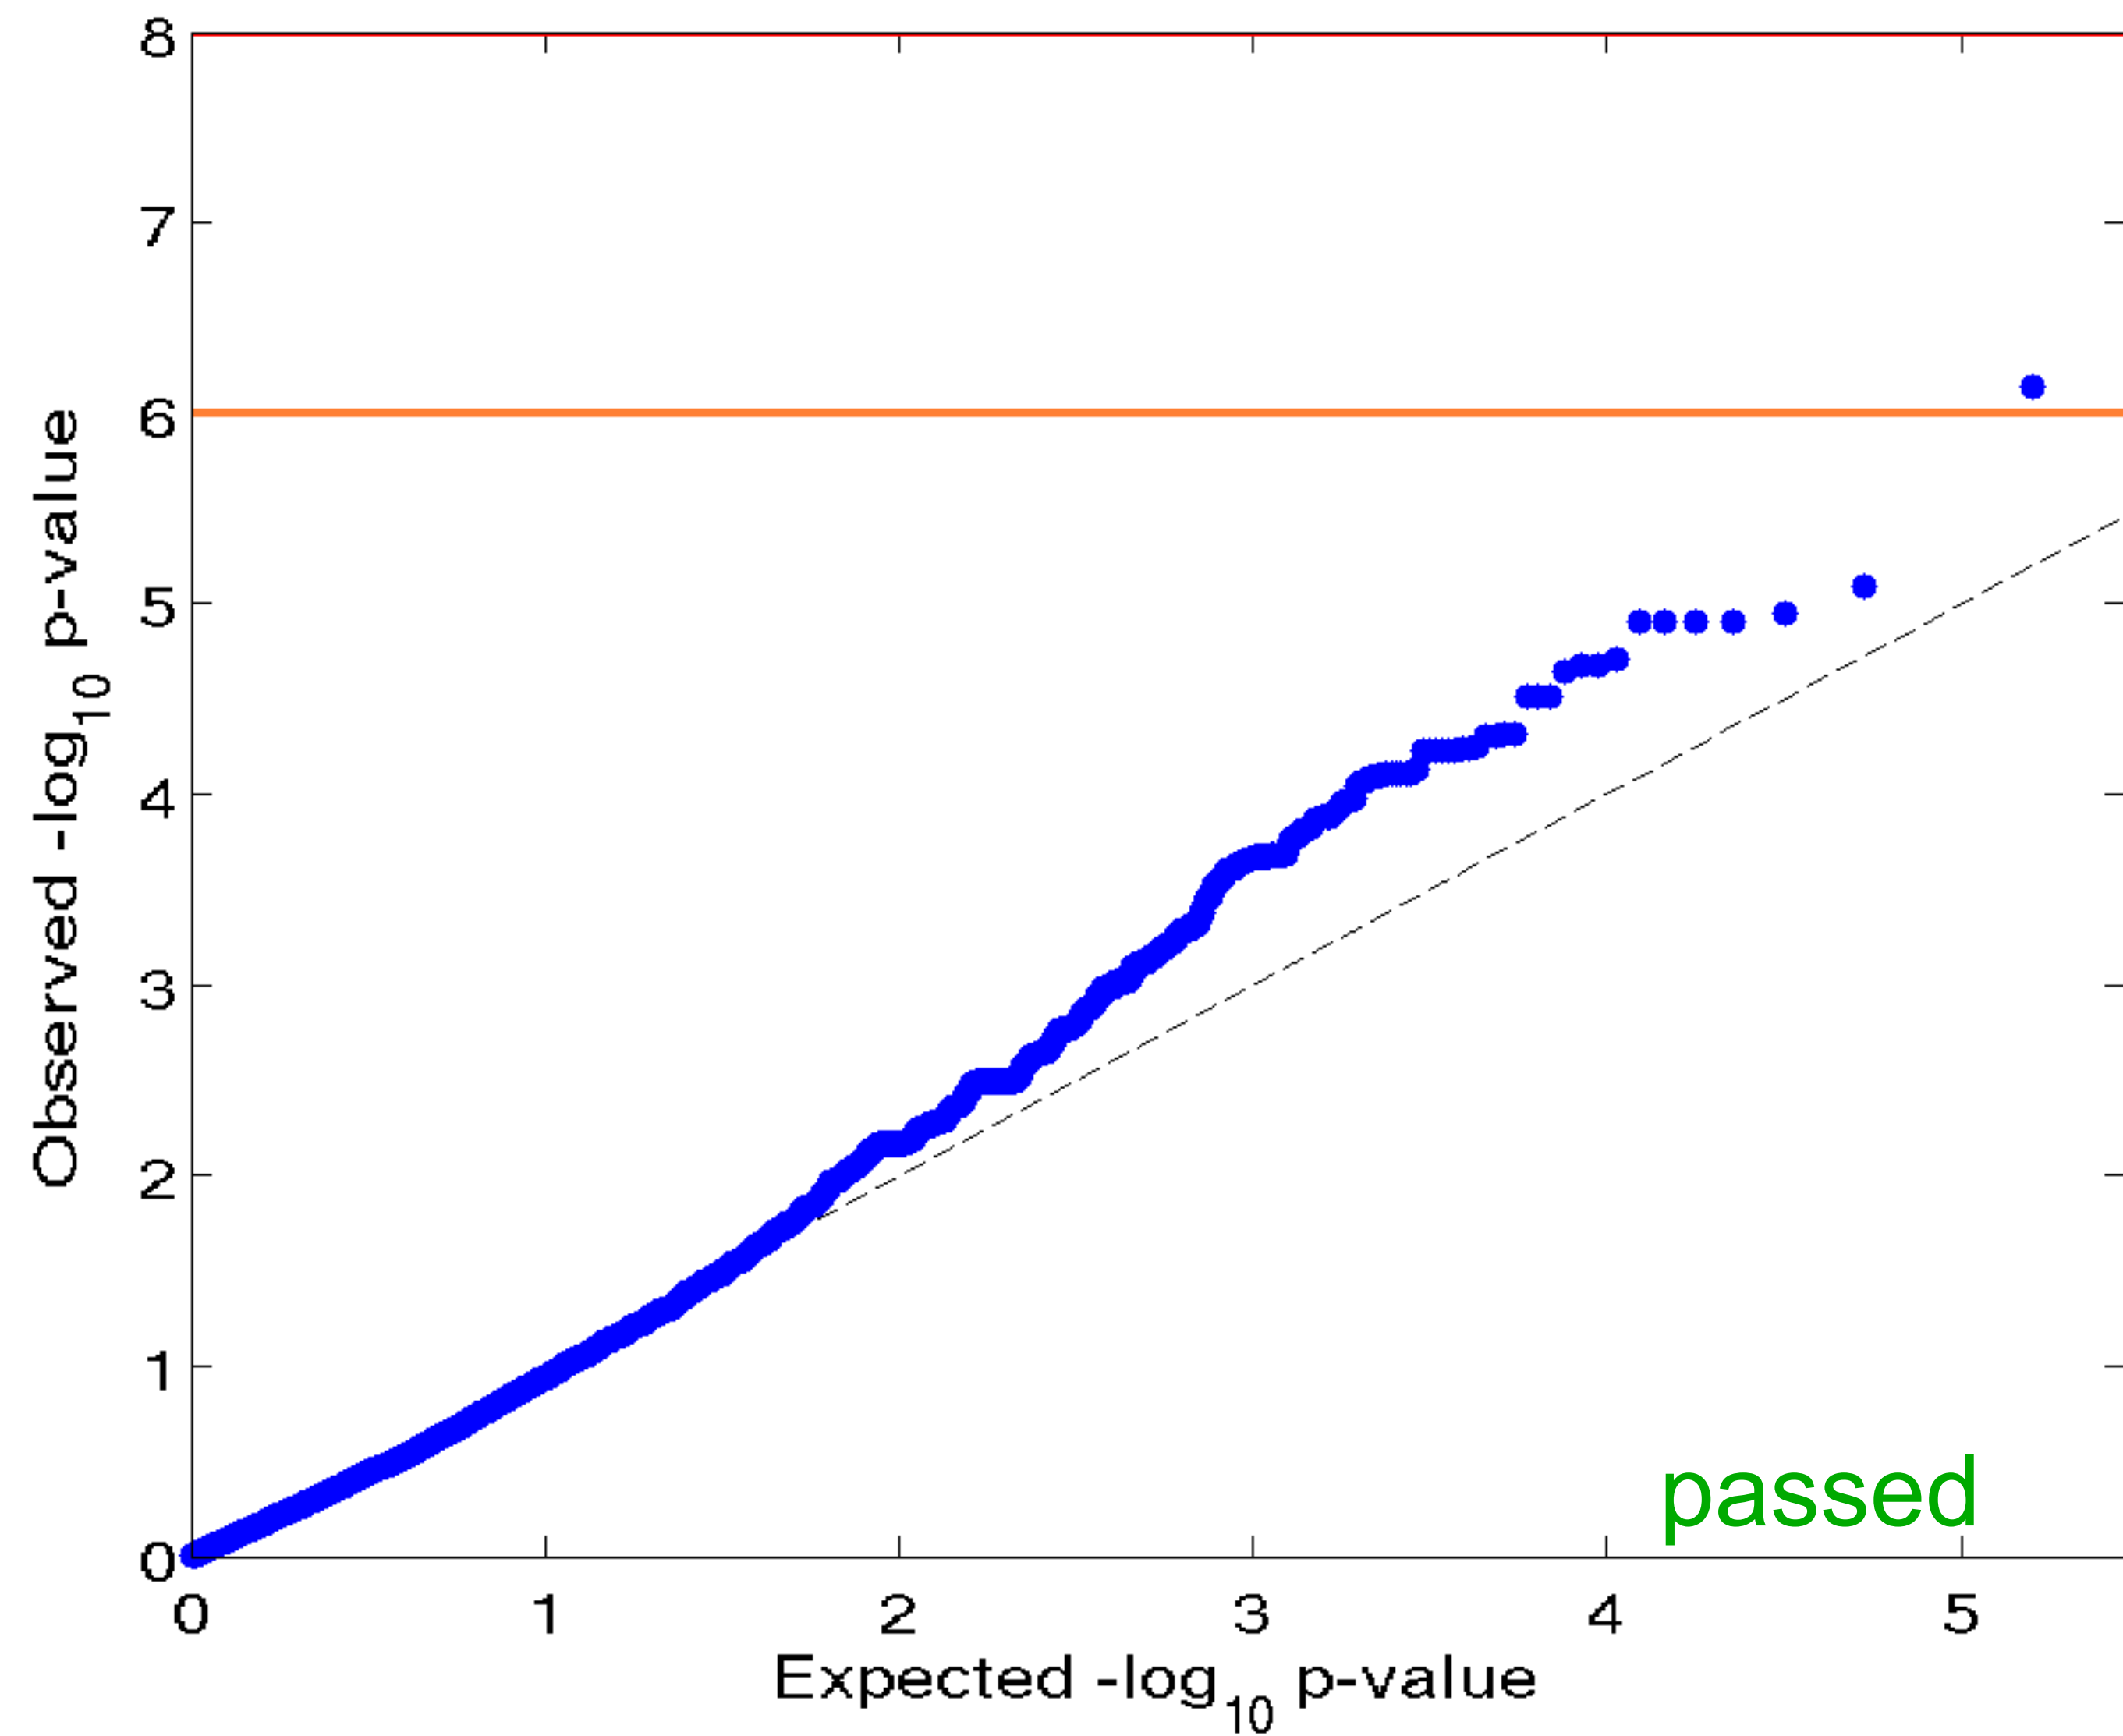

Supplement: S5 (10.1371/journal.pone.0041032.s005) [file journal.pone.0041032.s005]
