# Supplementary material for: Mapping Genetic Variants Associated with Beta-Adrenergic Responses in Inbred Mice
Source: PLOS journal article supplement (doi:10.1371/journal.pone.0041032), 2012-07-31

AW/BWS - iso10 vs ctr

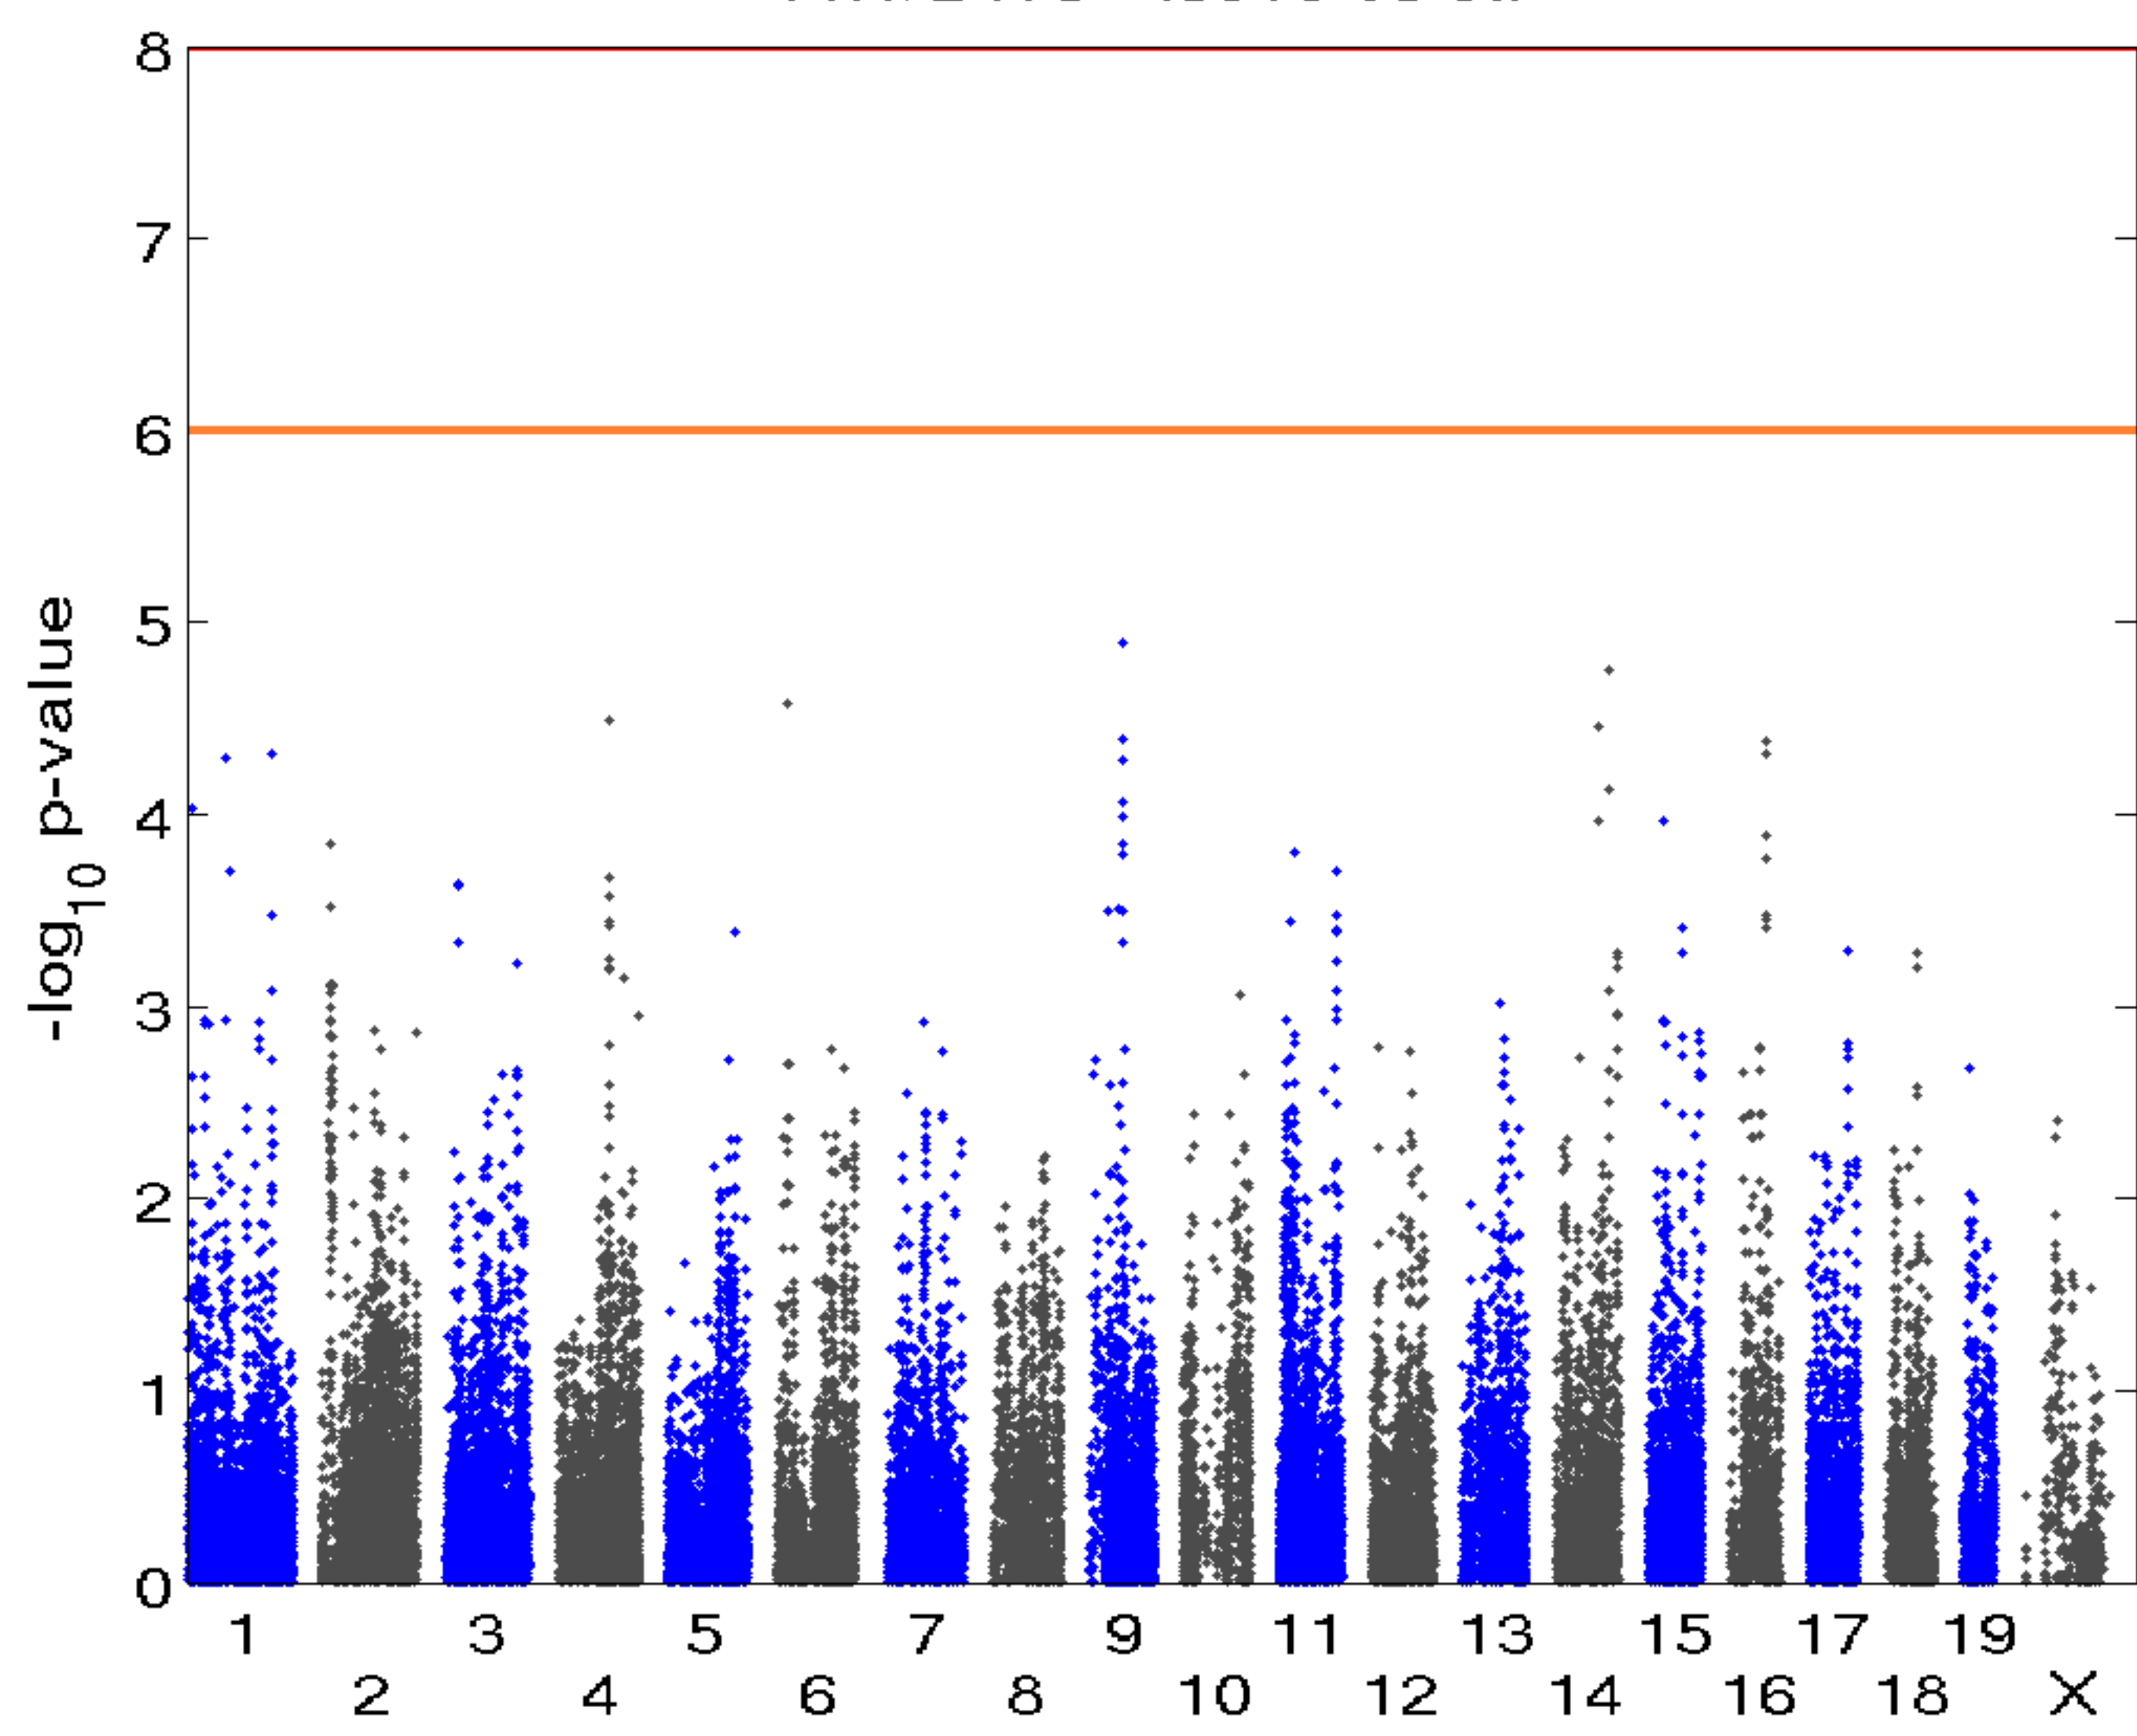

AW/BWS - iso10 vs ctr

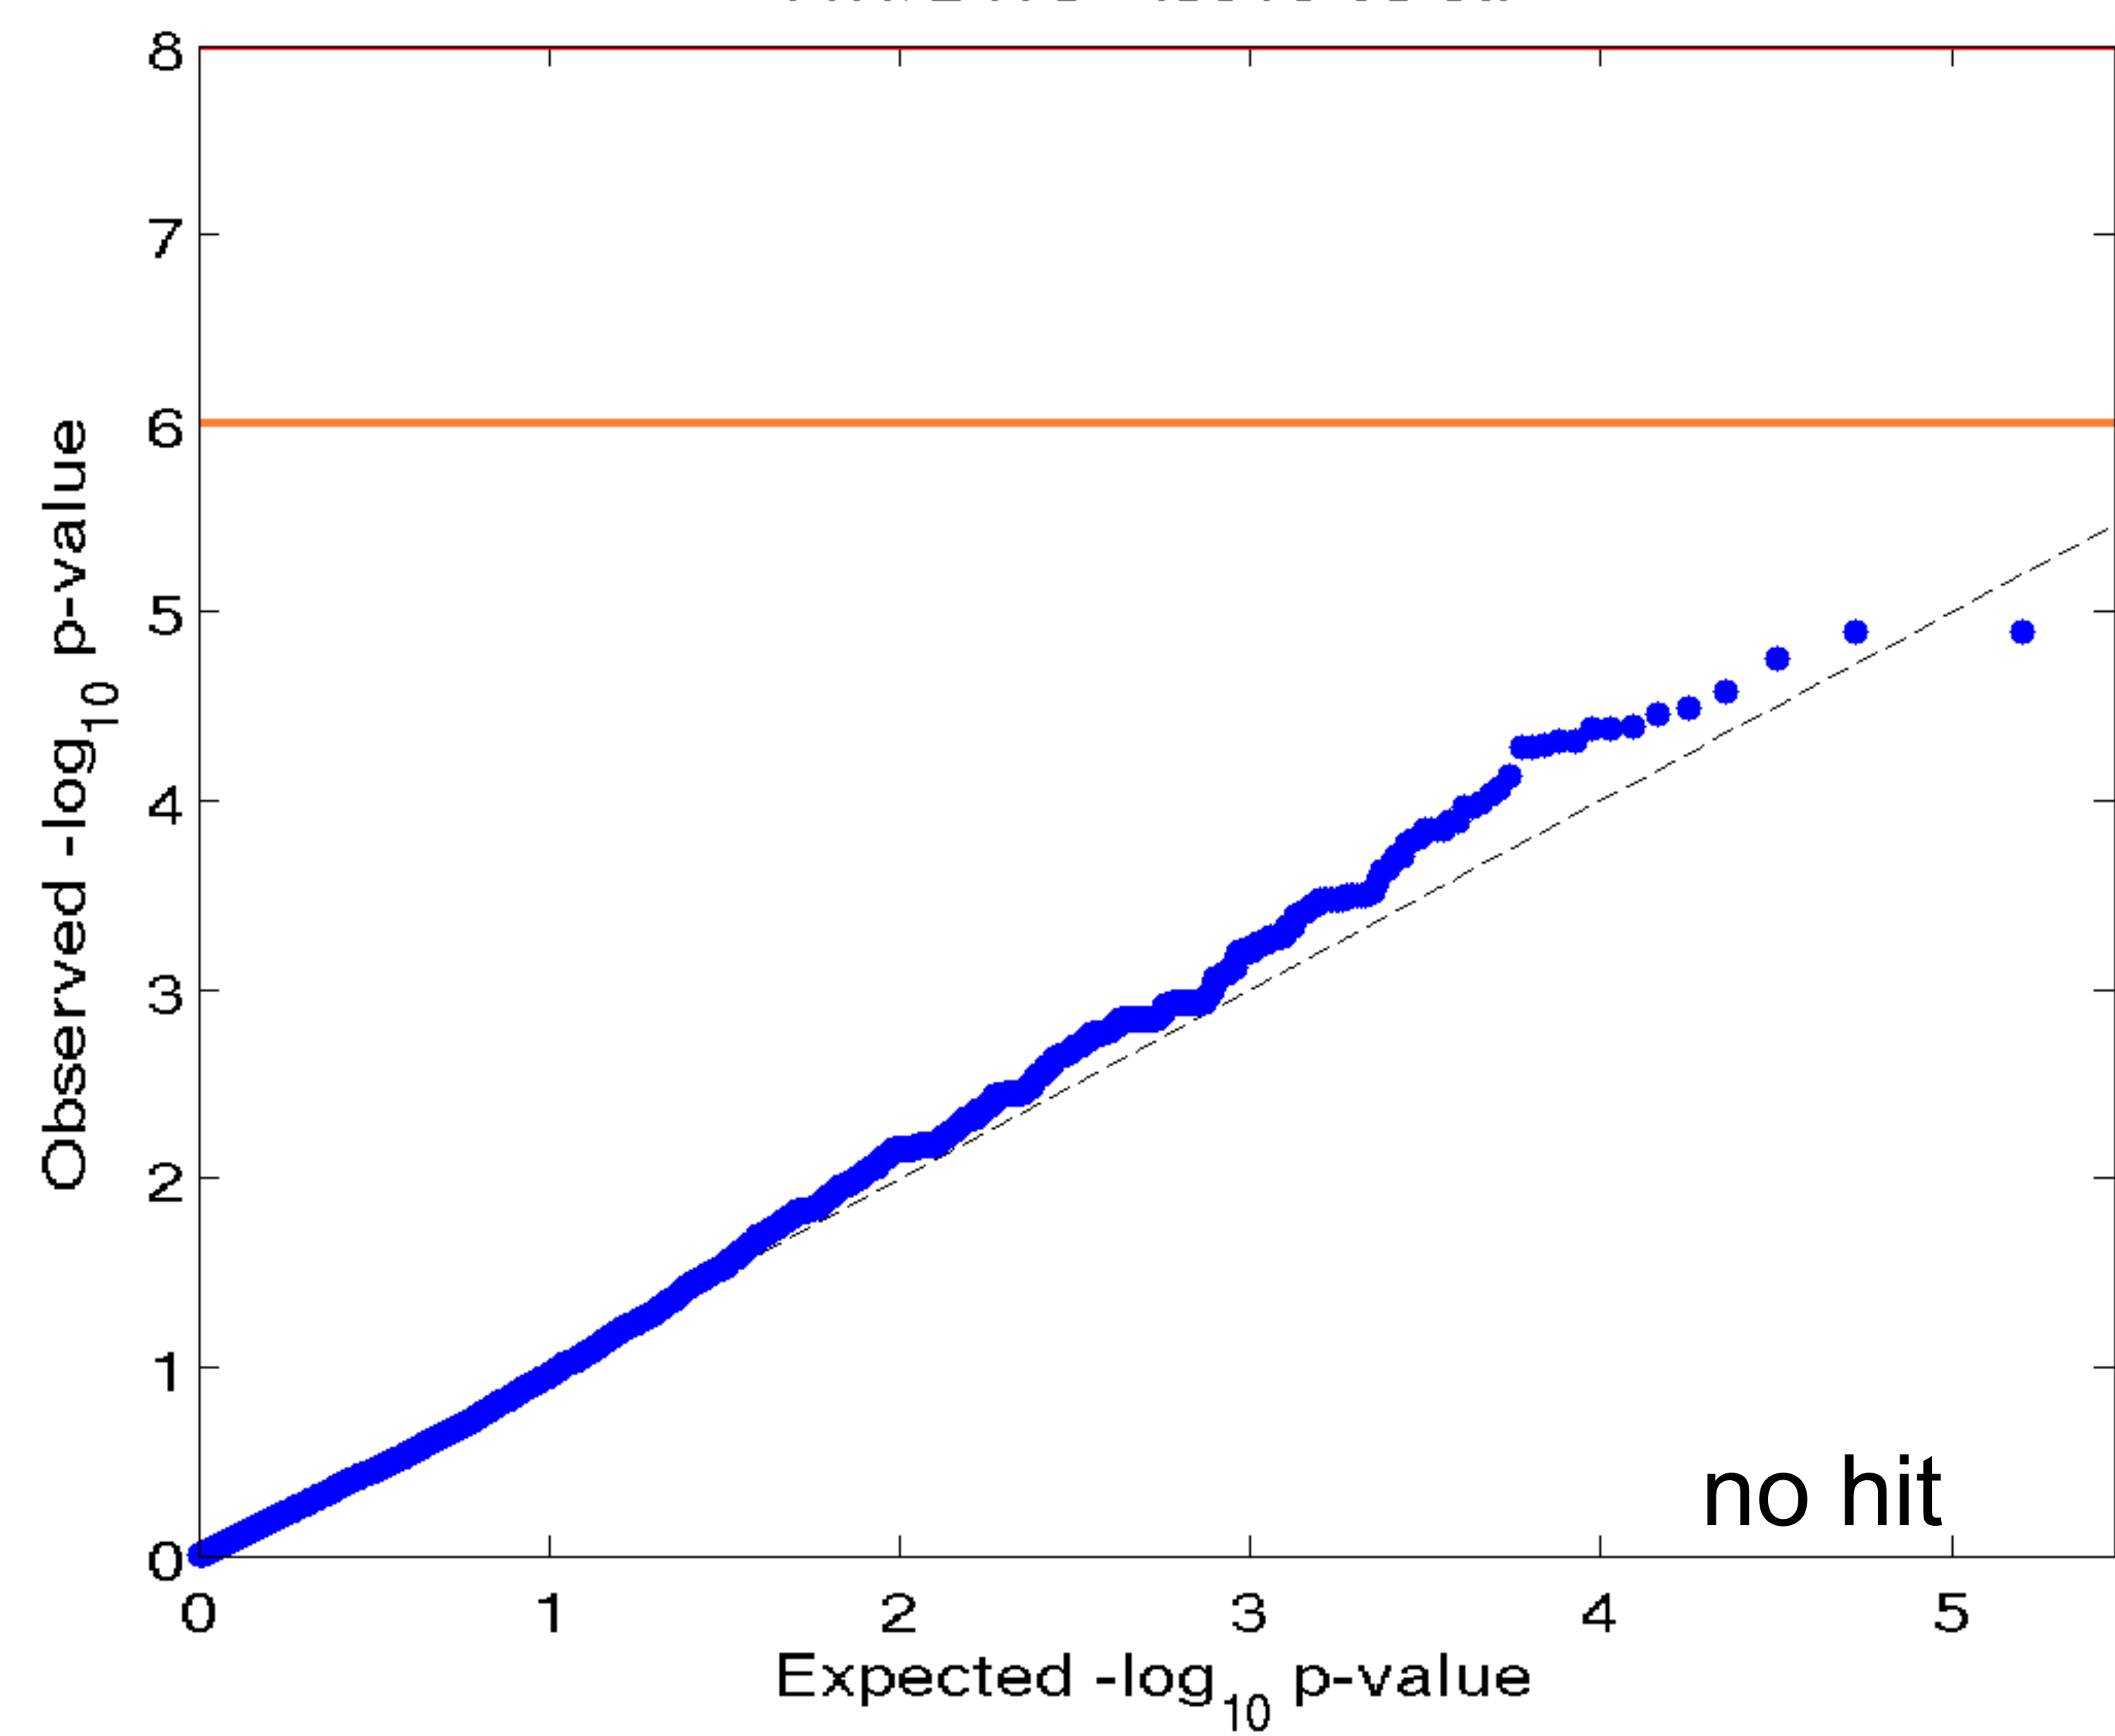

AWI - iso10 vs ctr

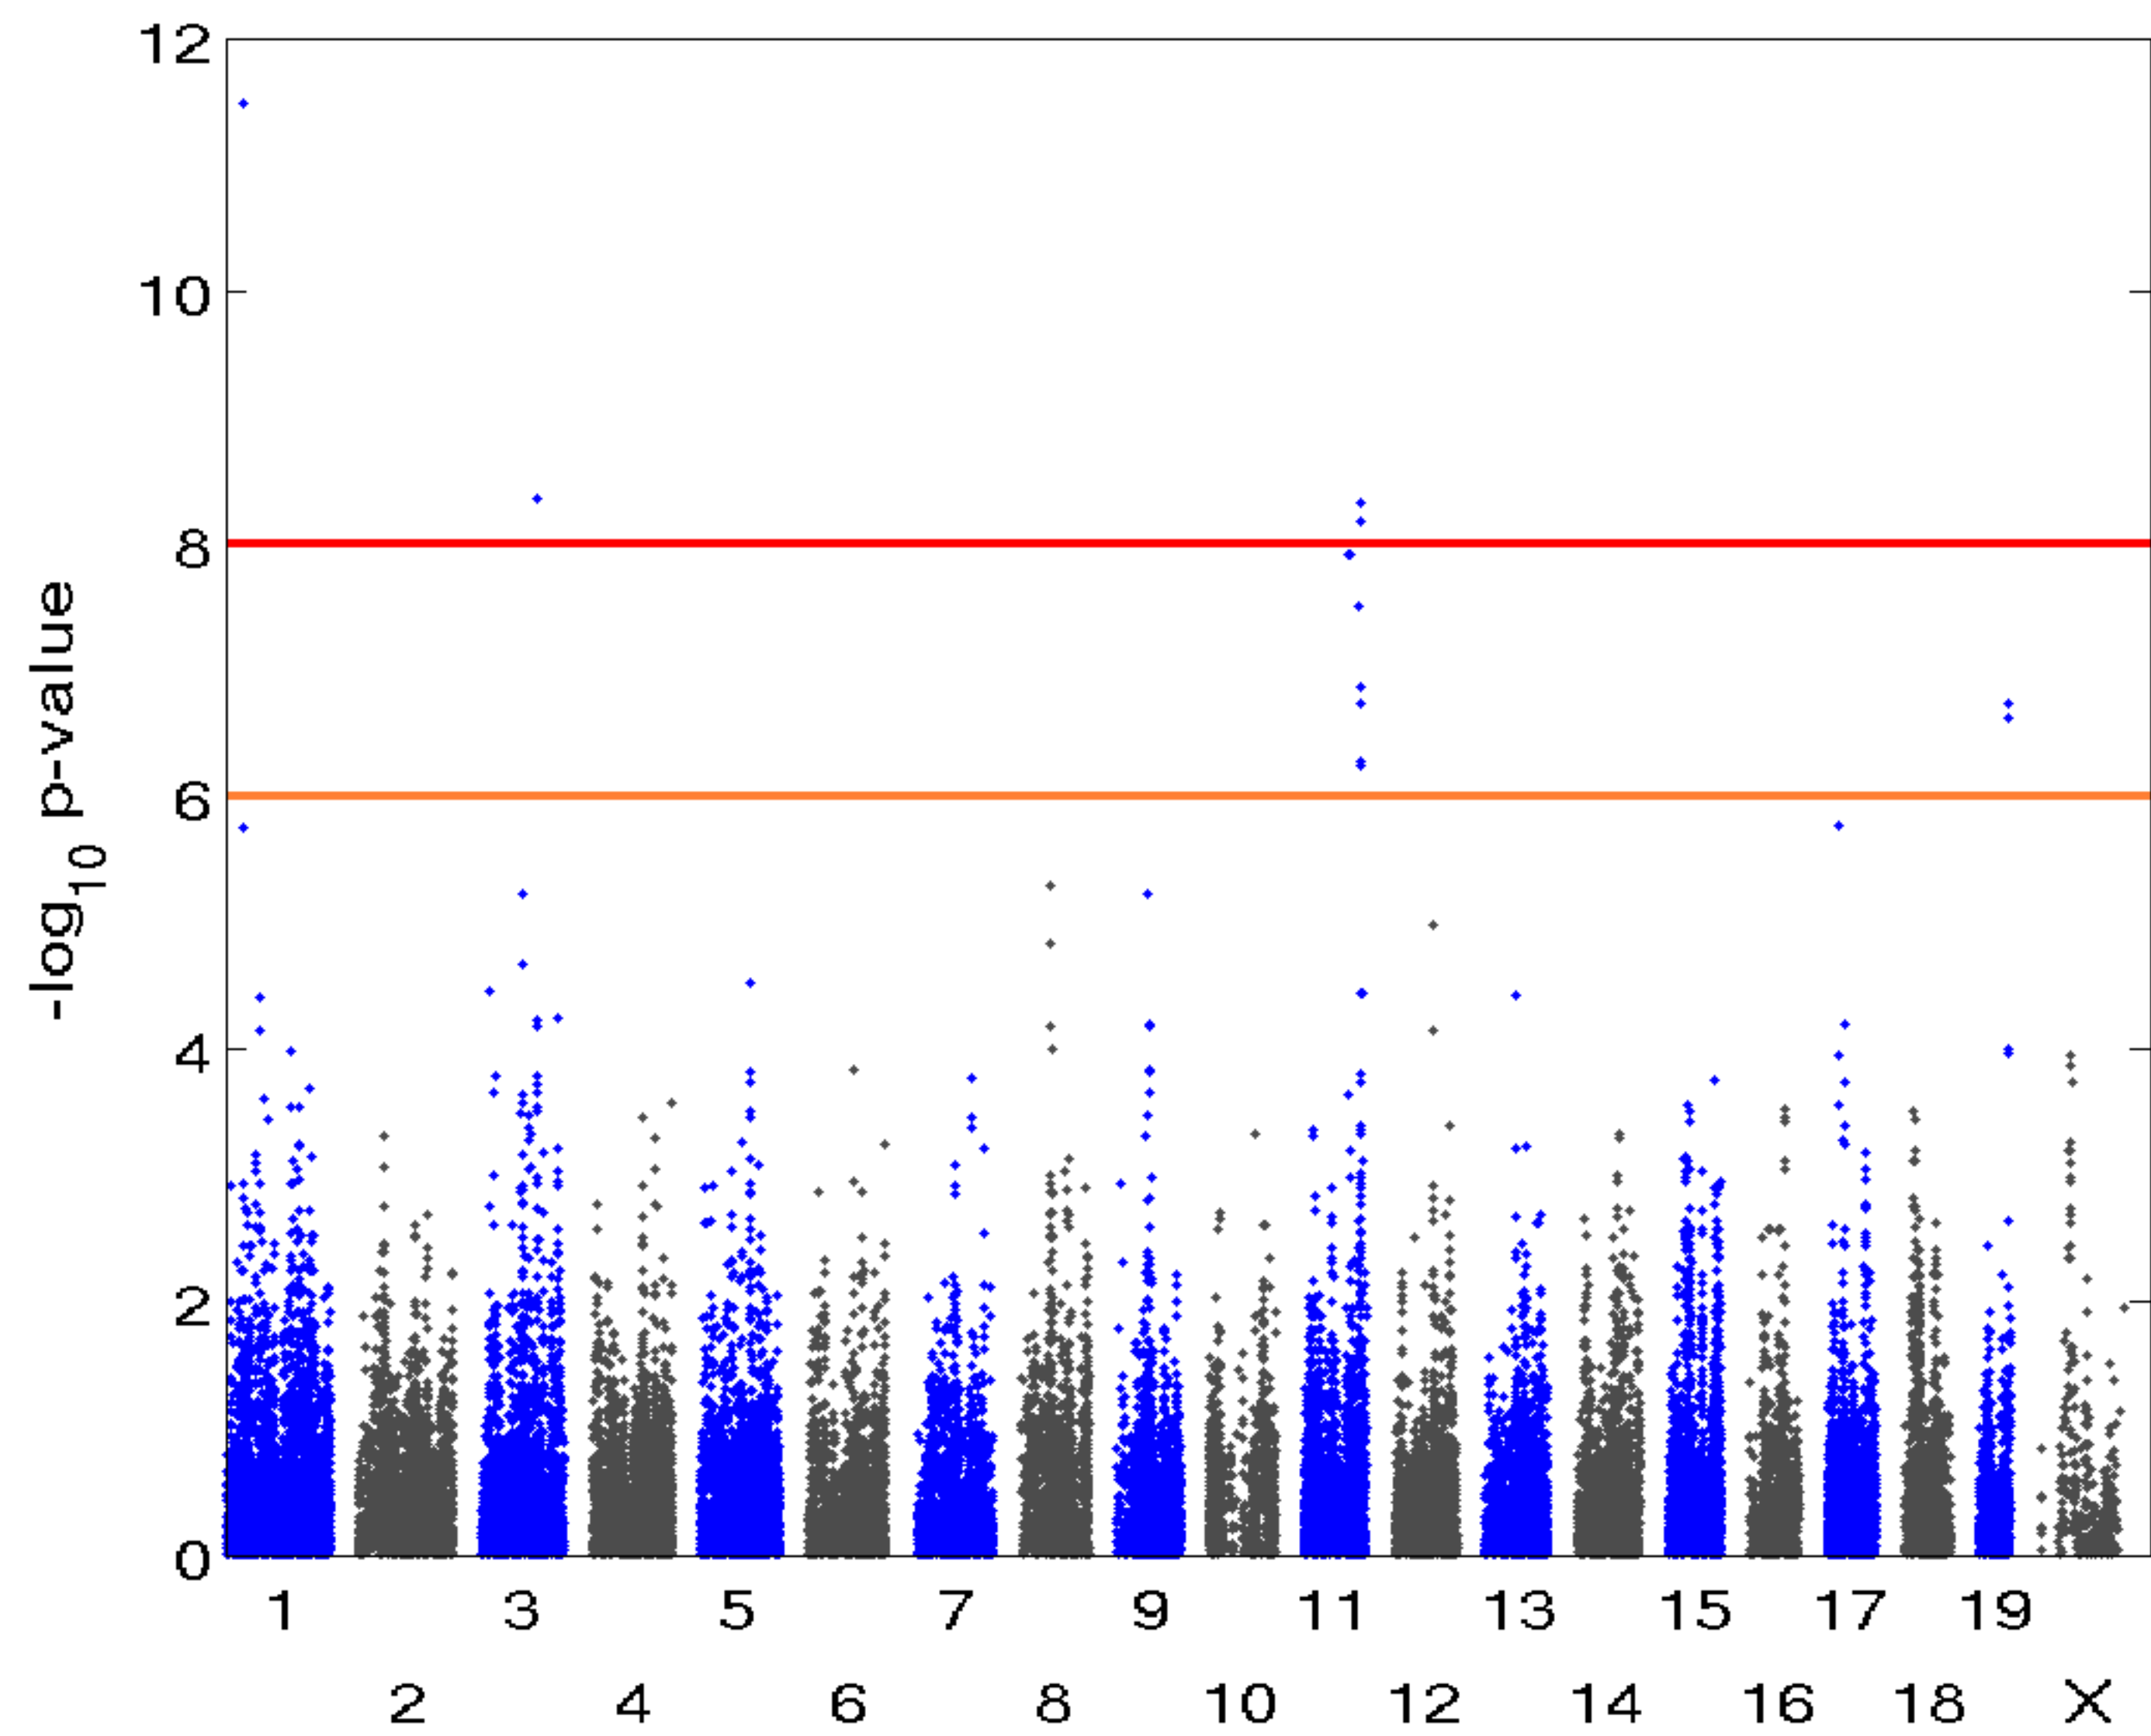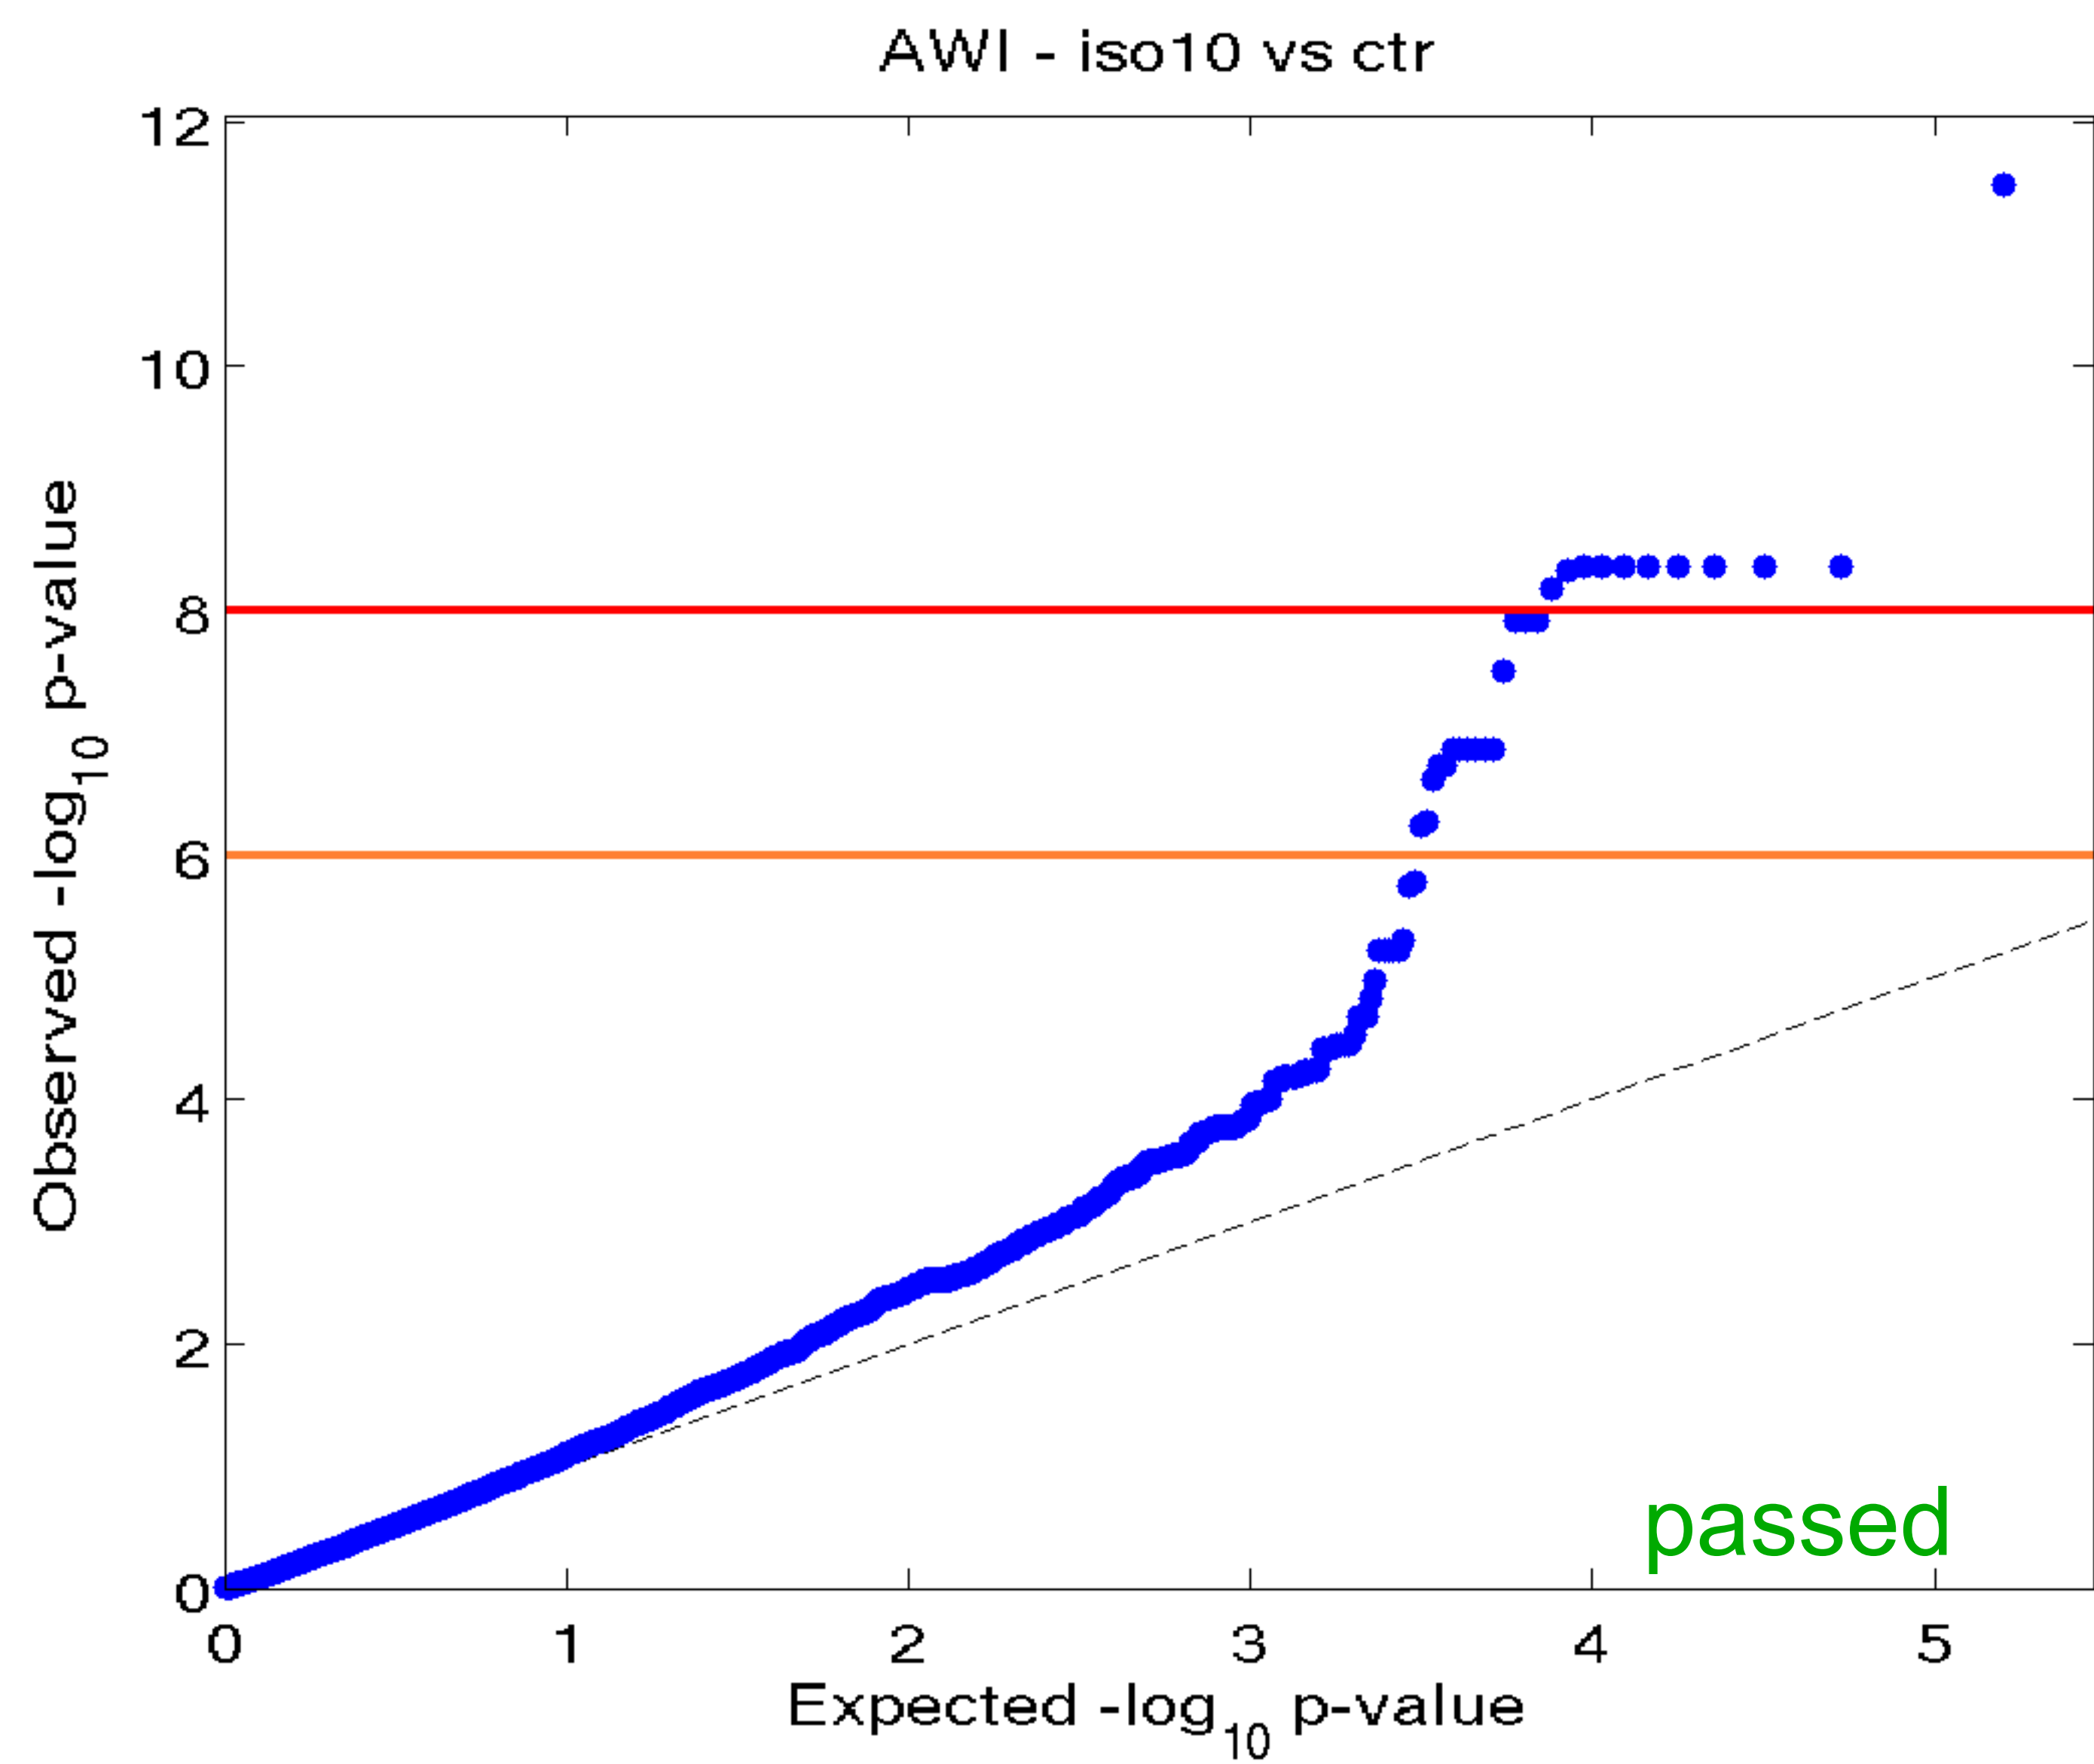

AW - iso10 vs ctr

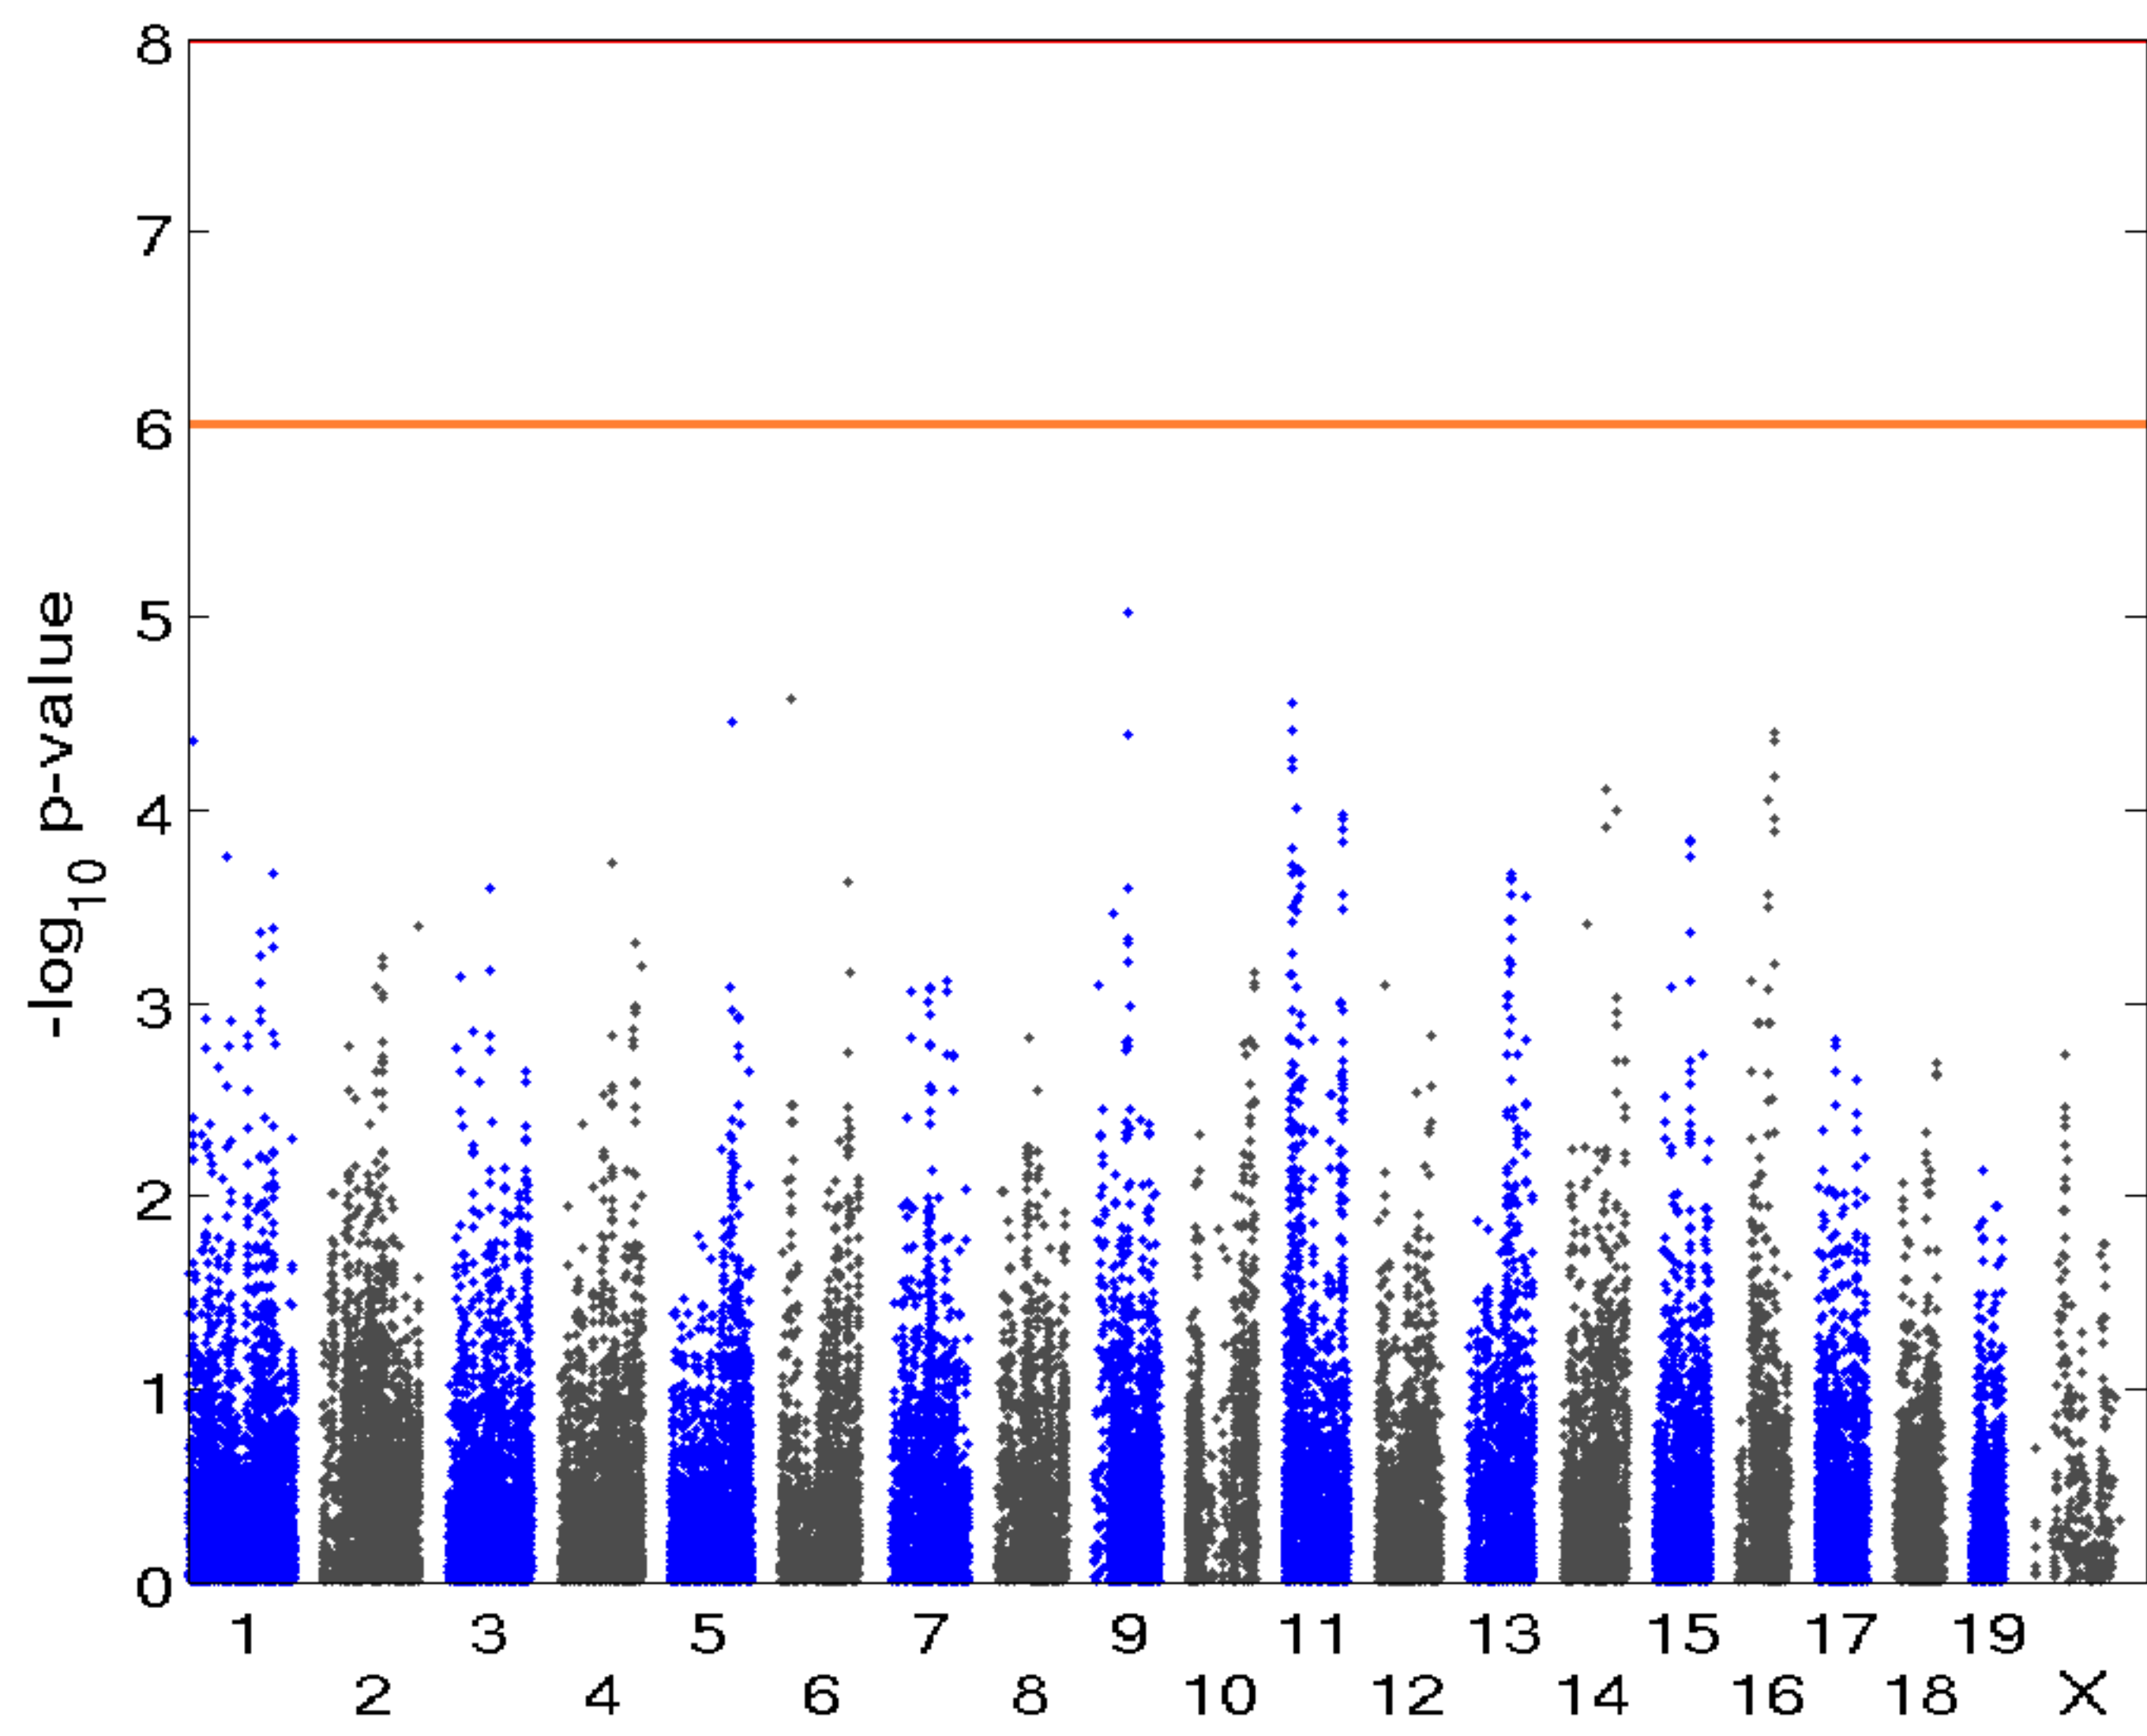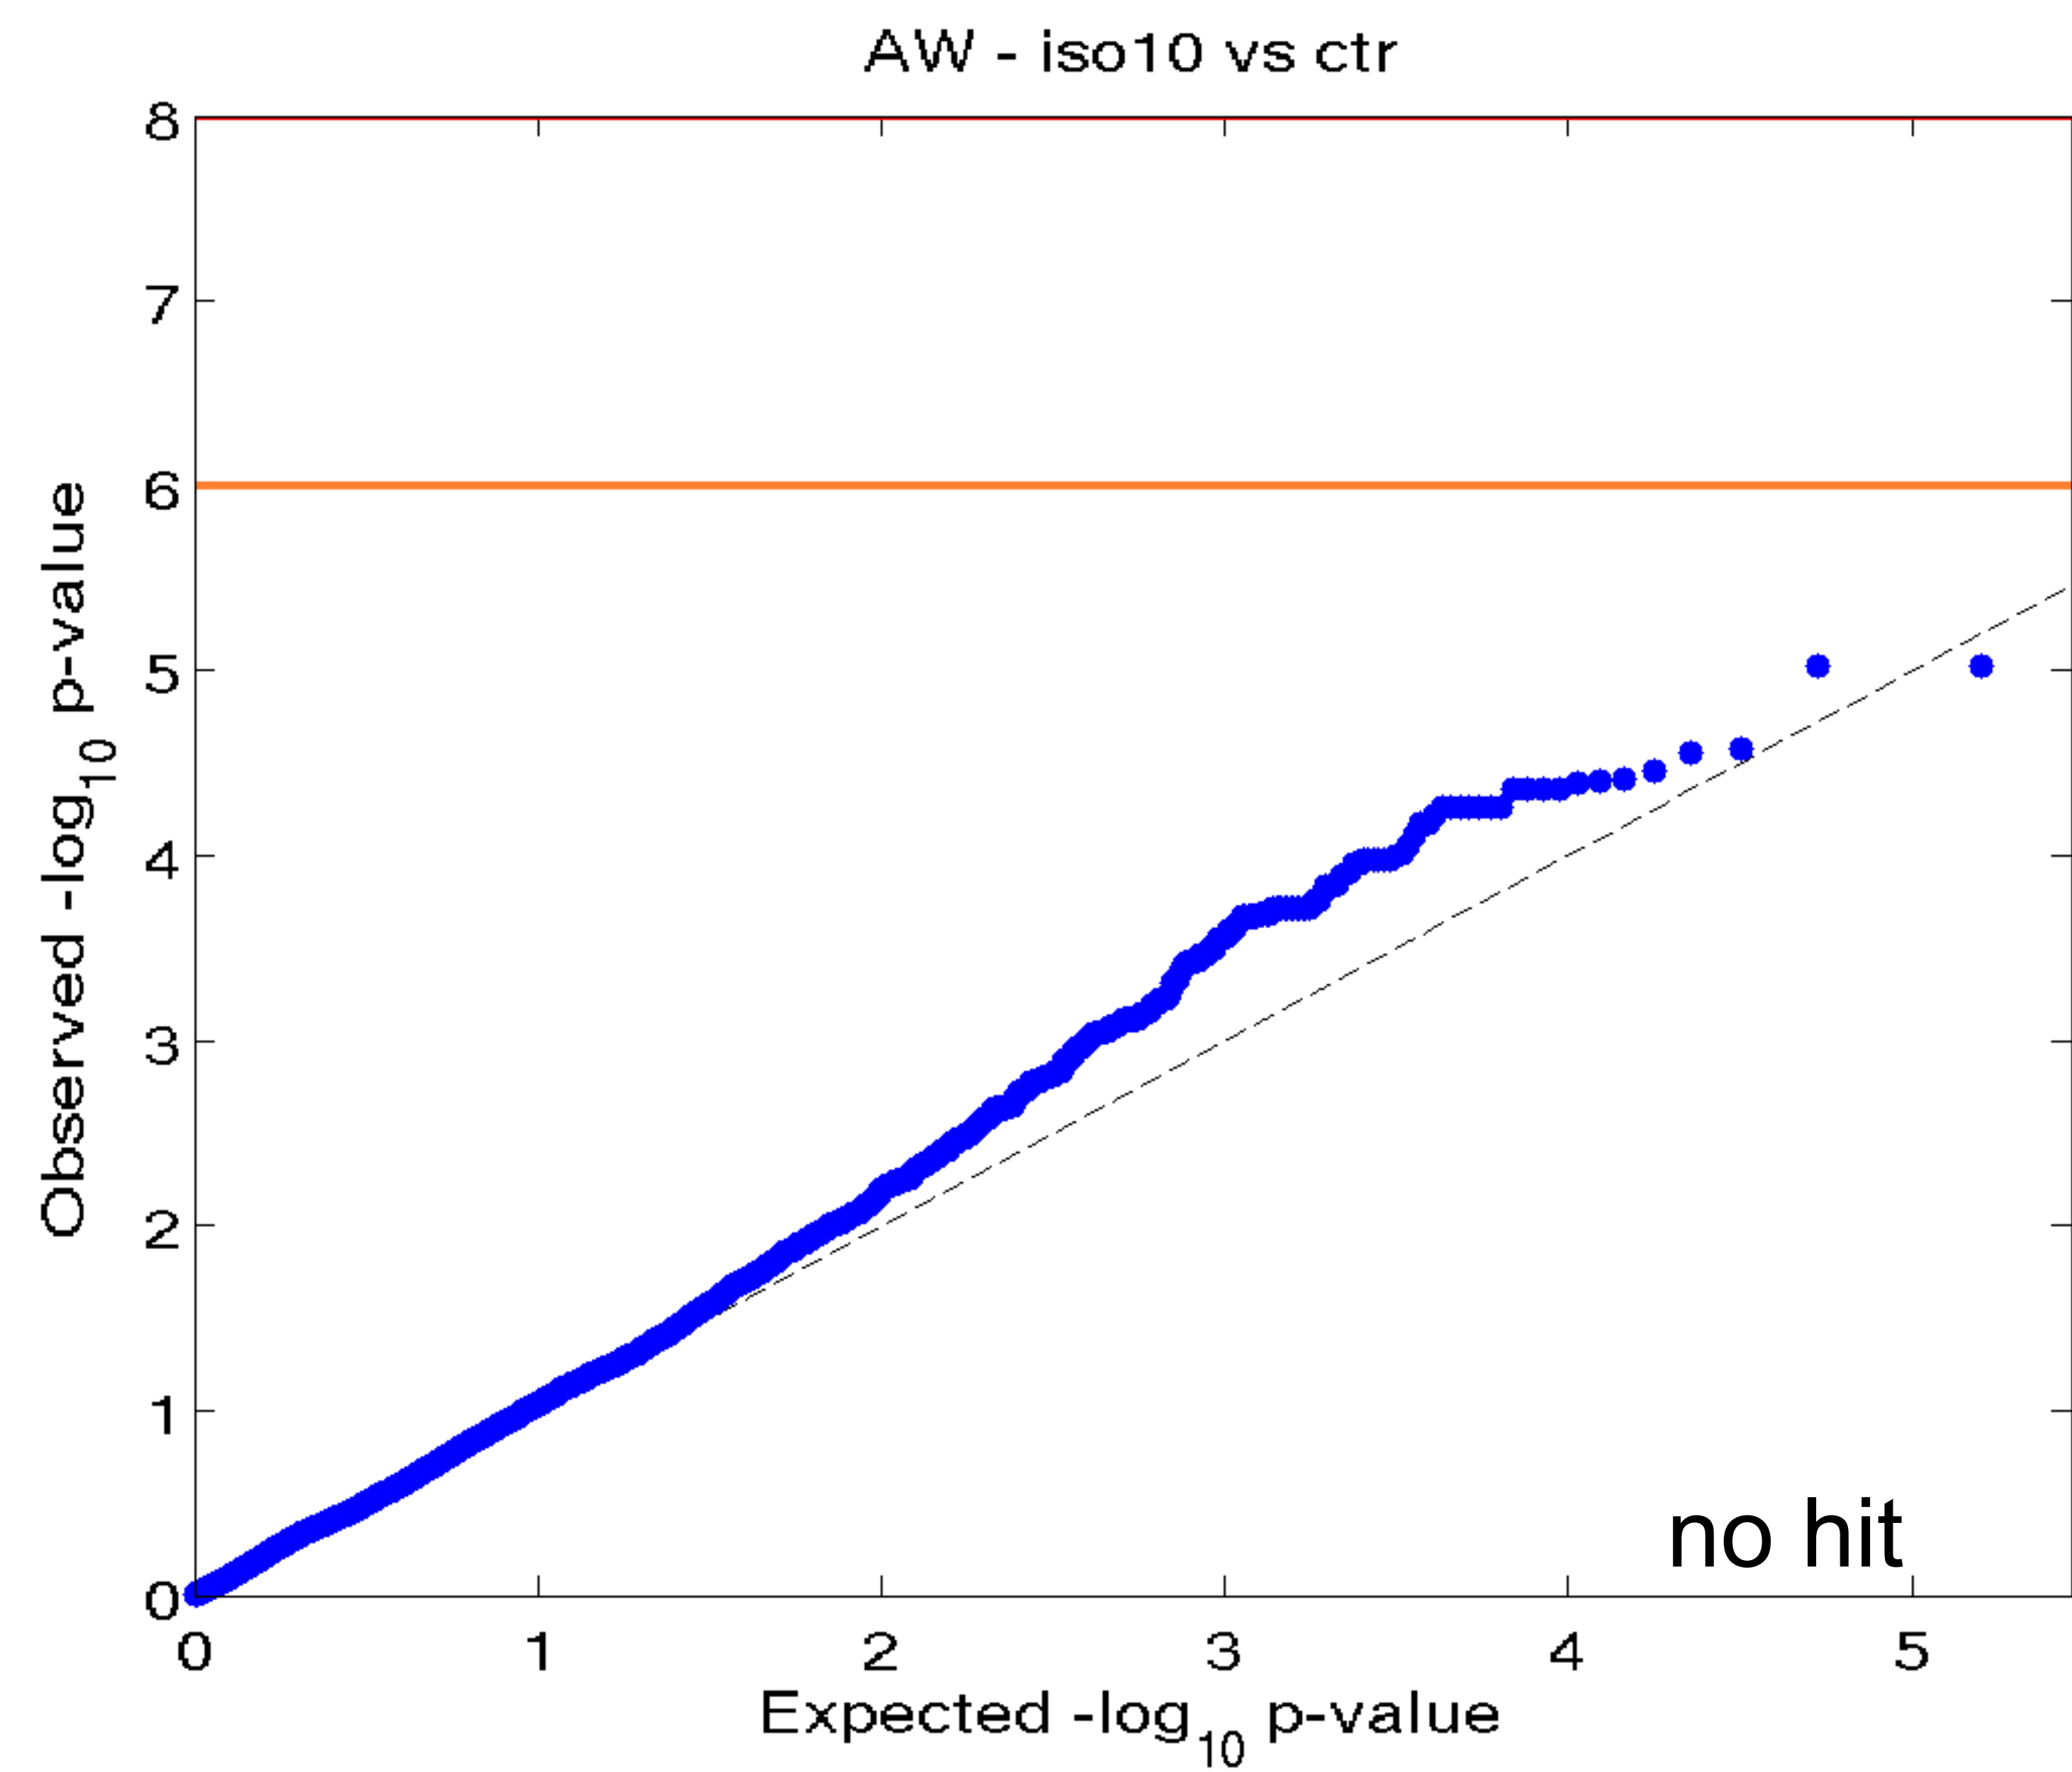

BWE - iso10 vs ctr

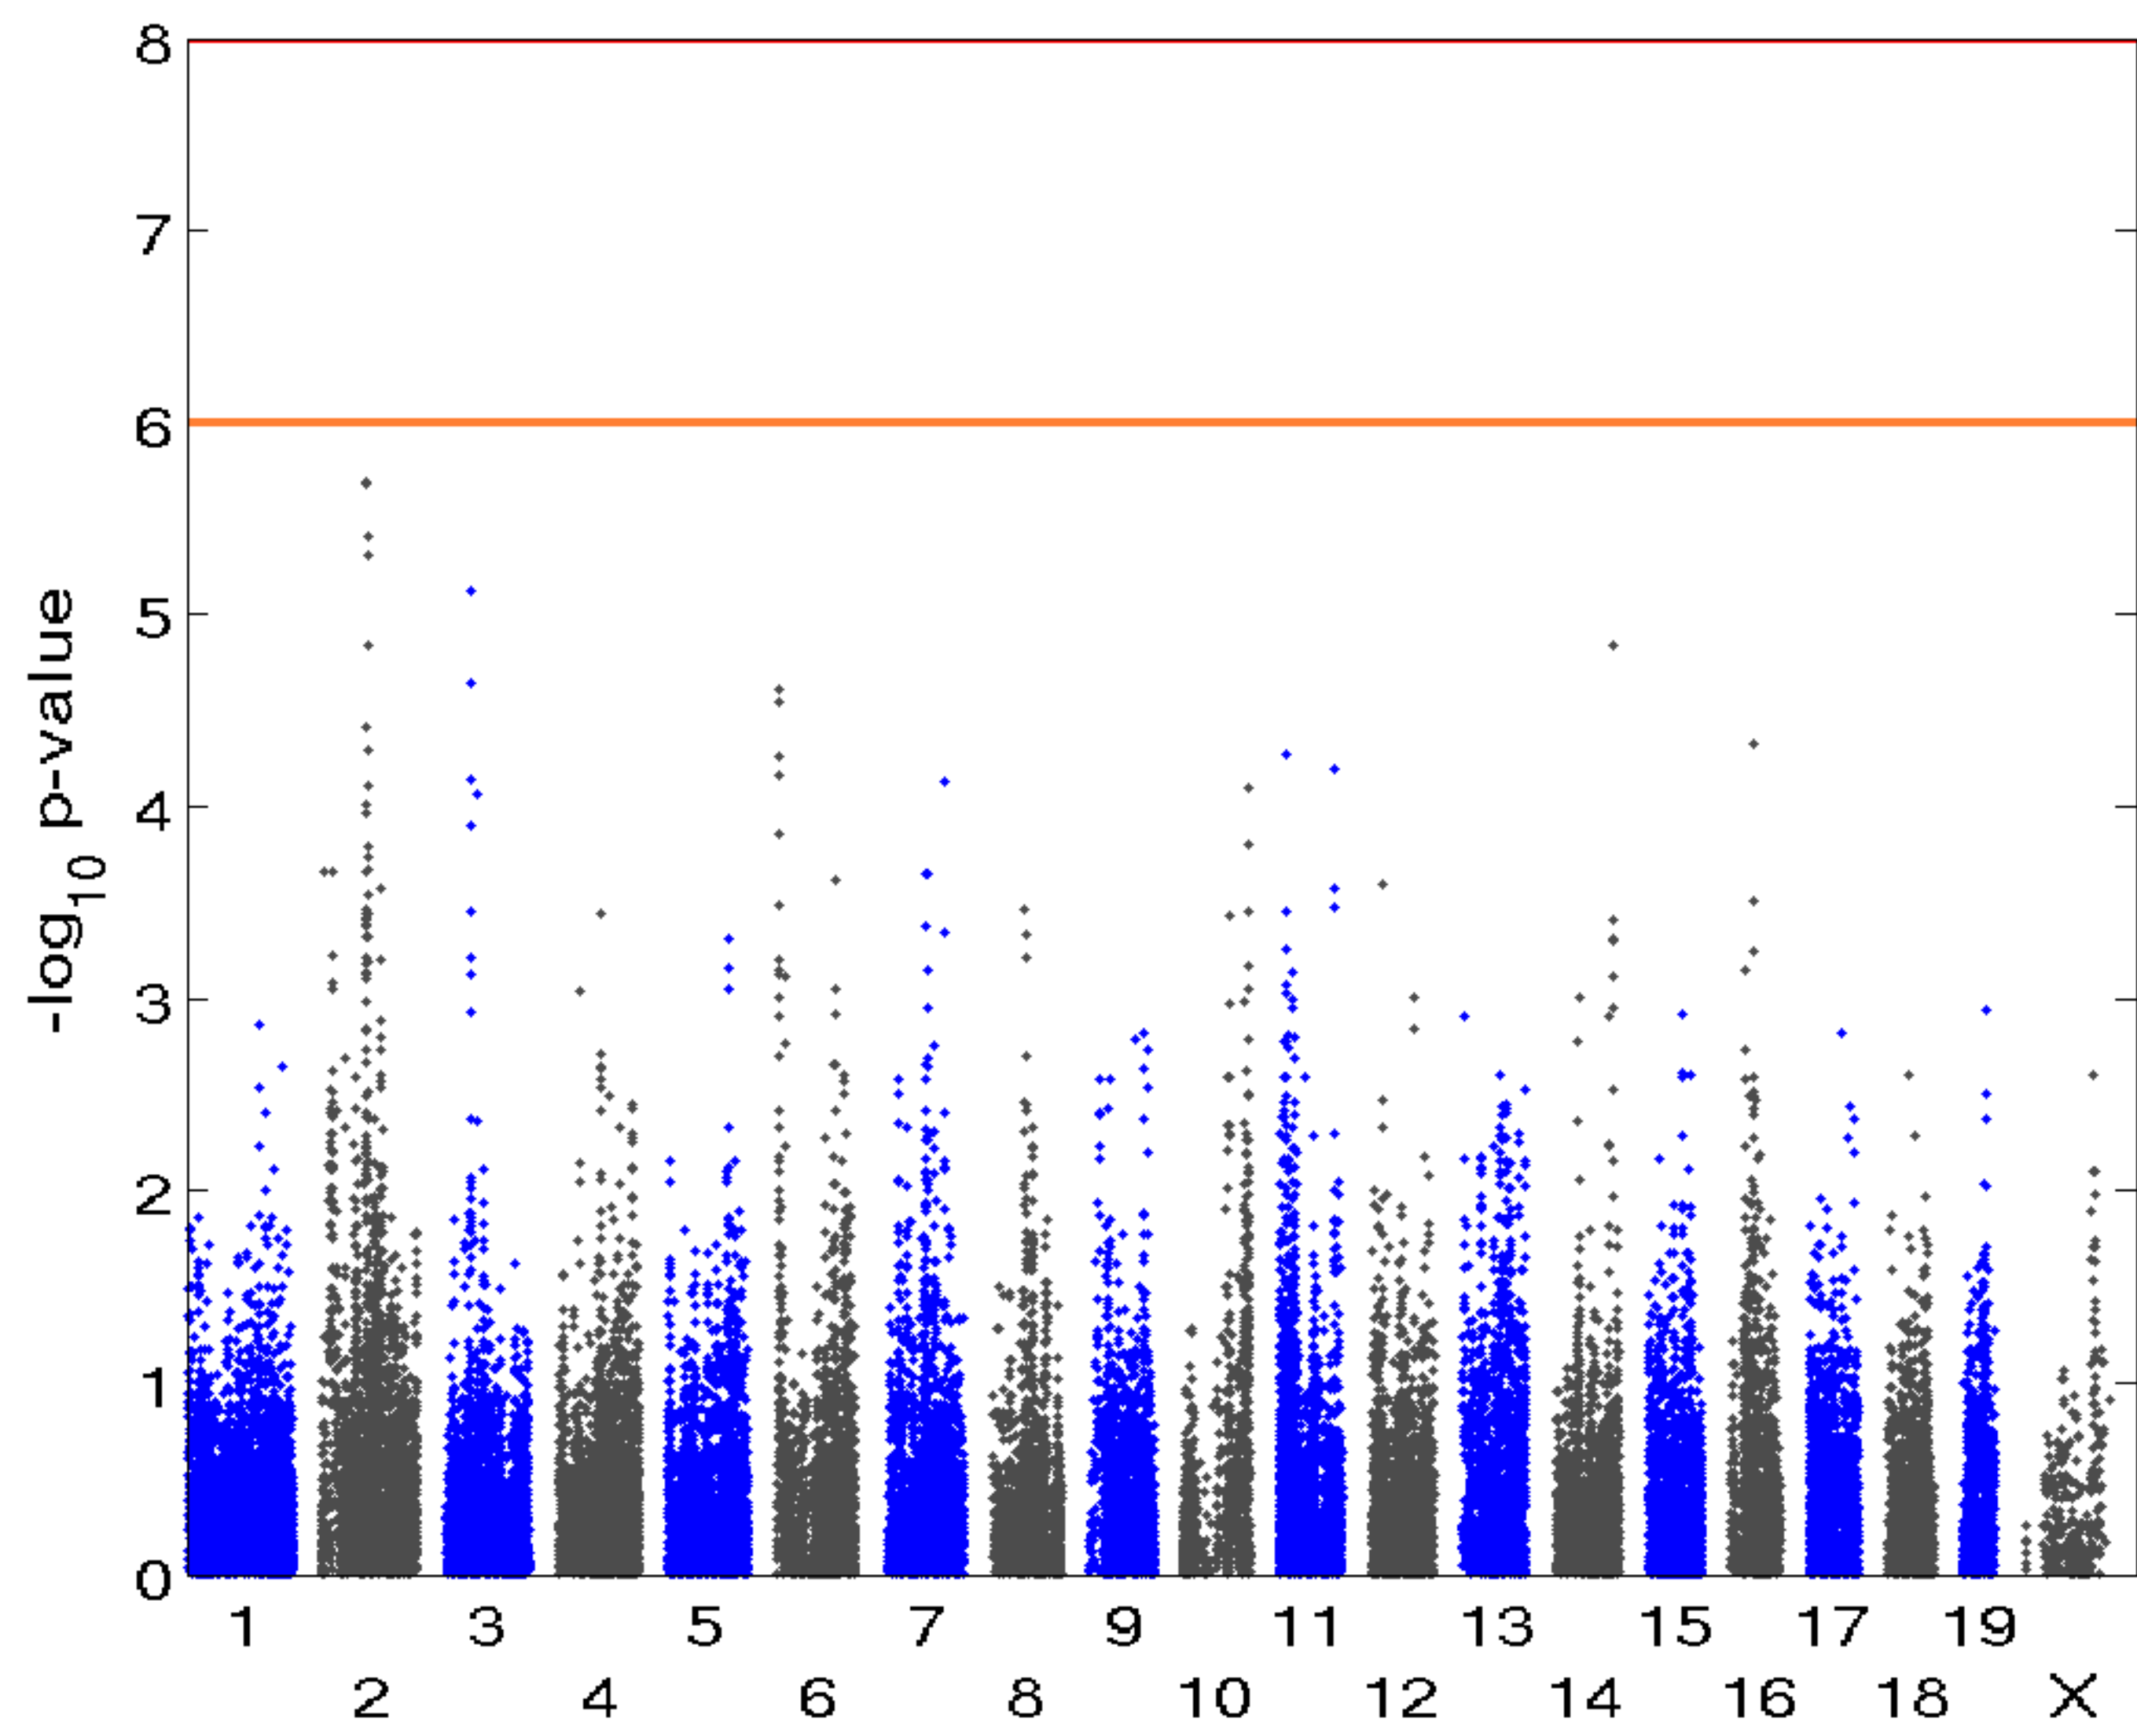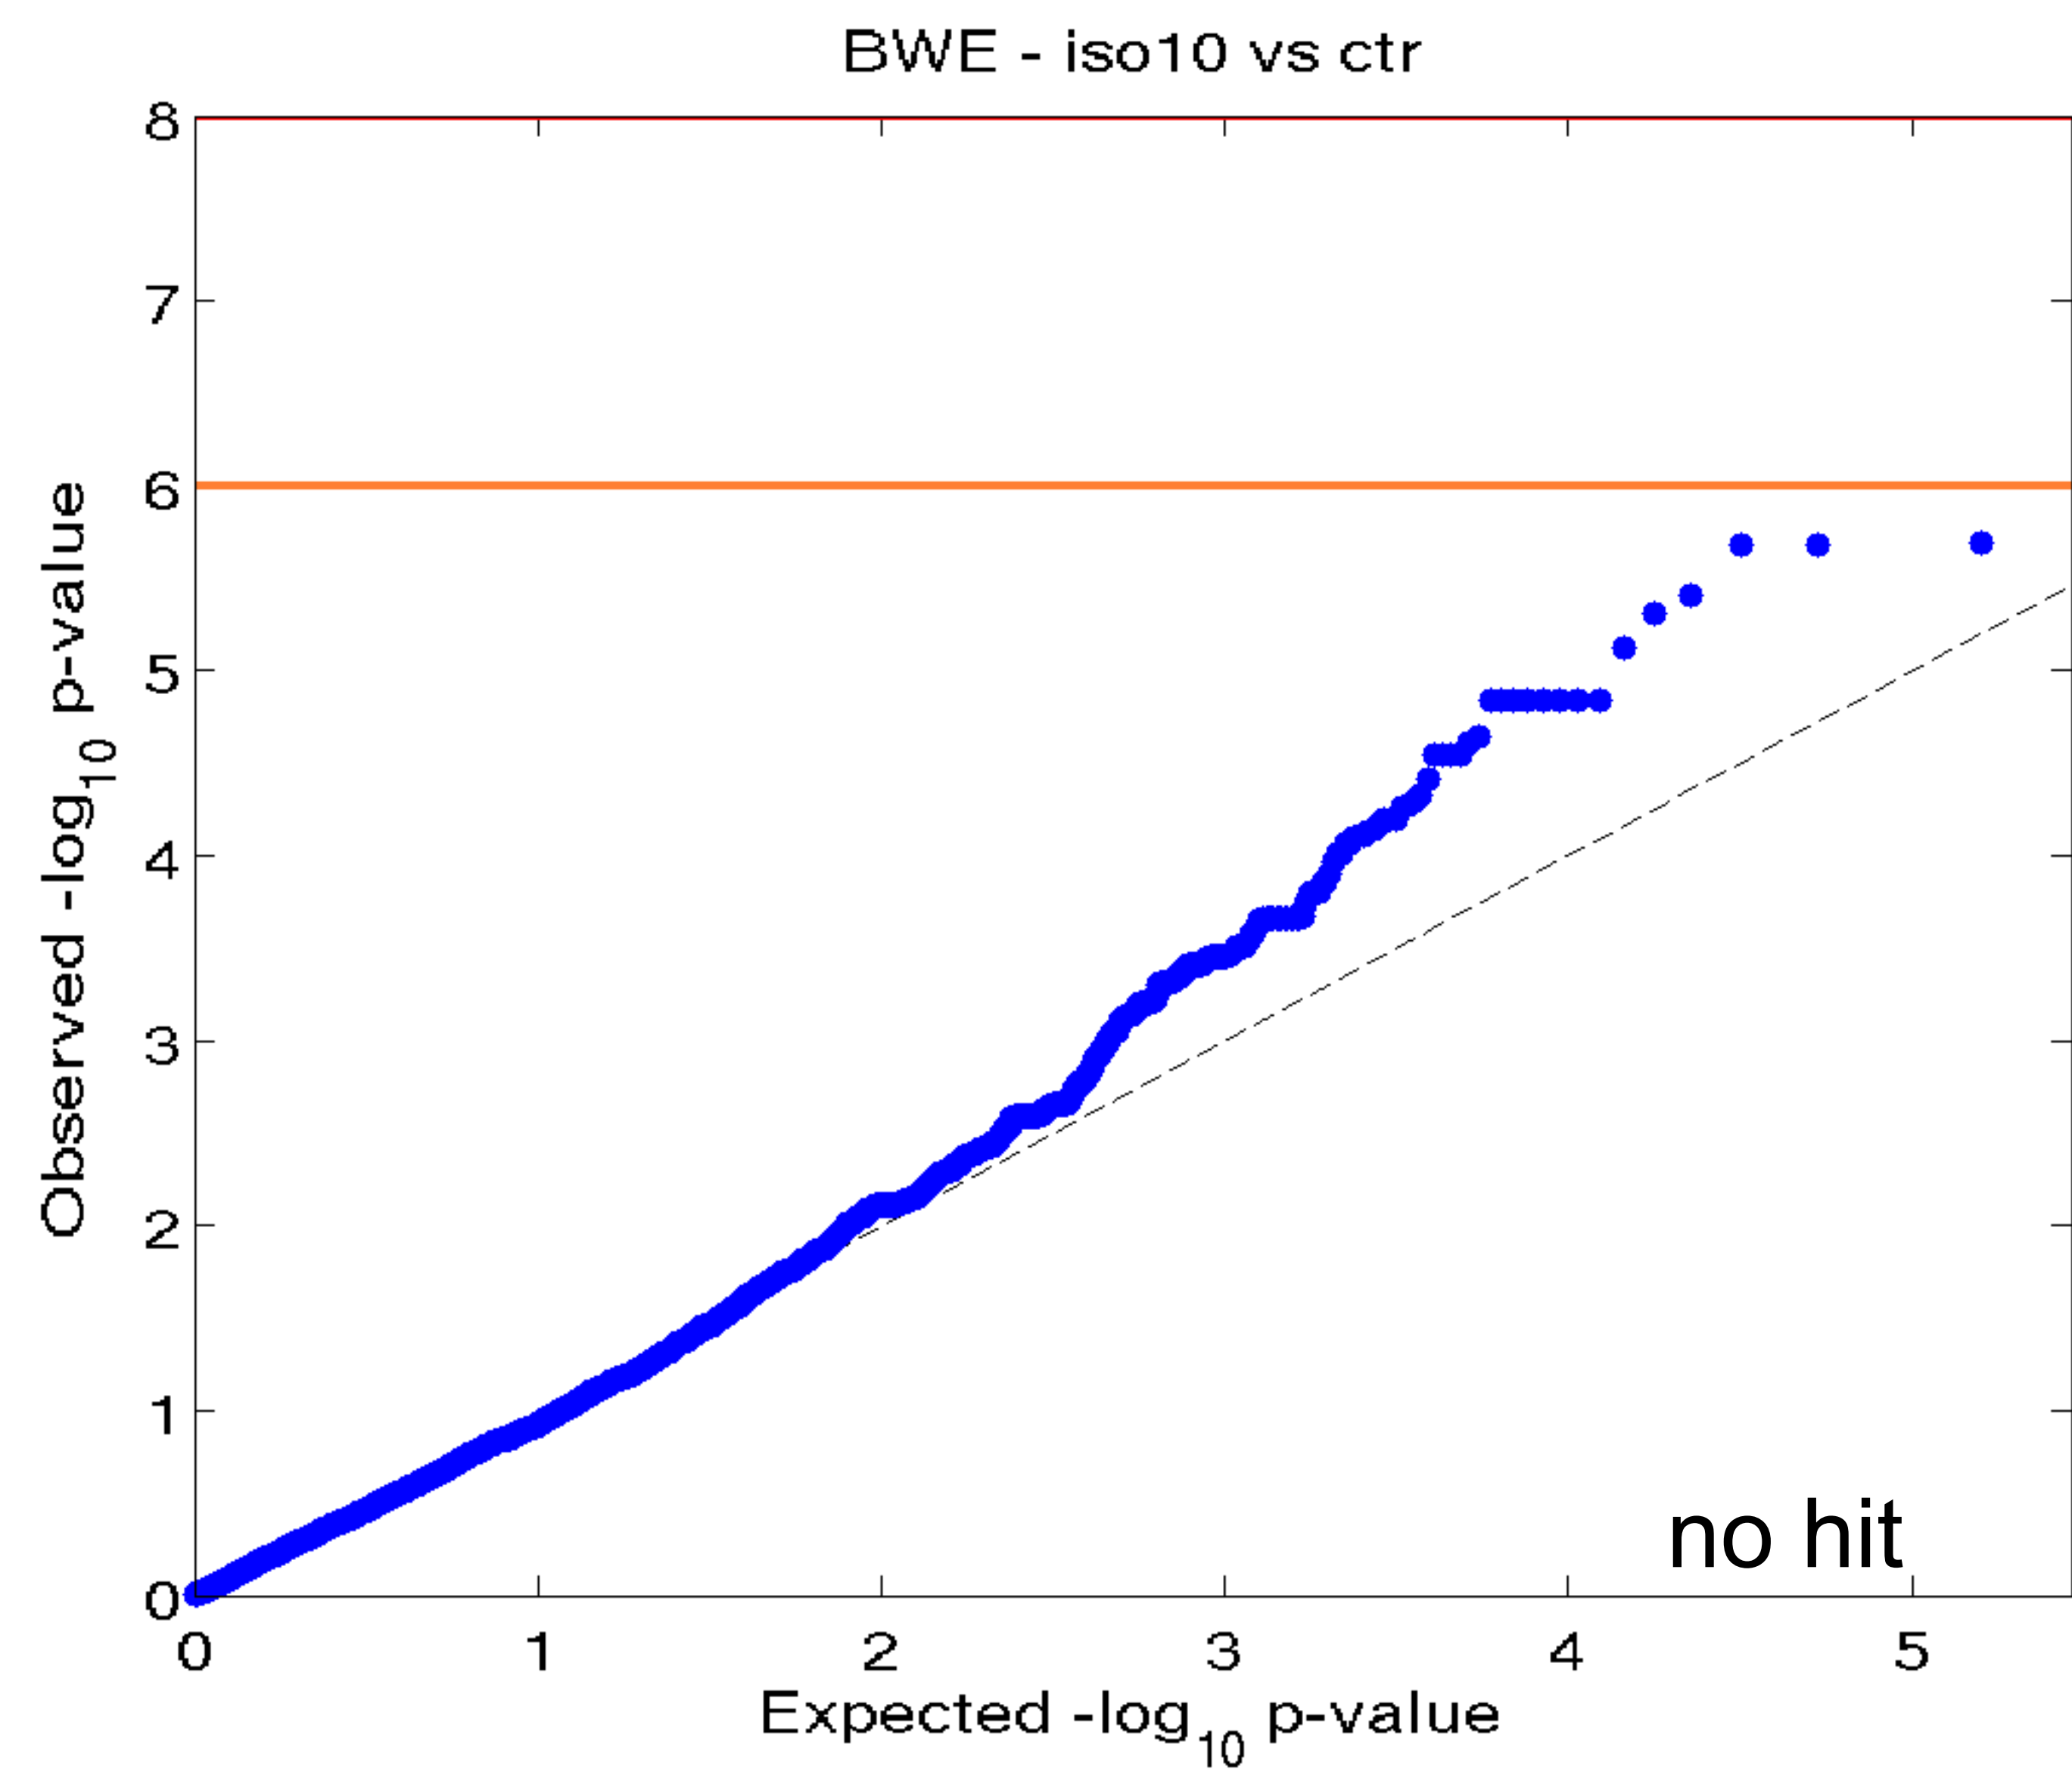



HR-ECG - iso10 vs ctr

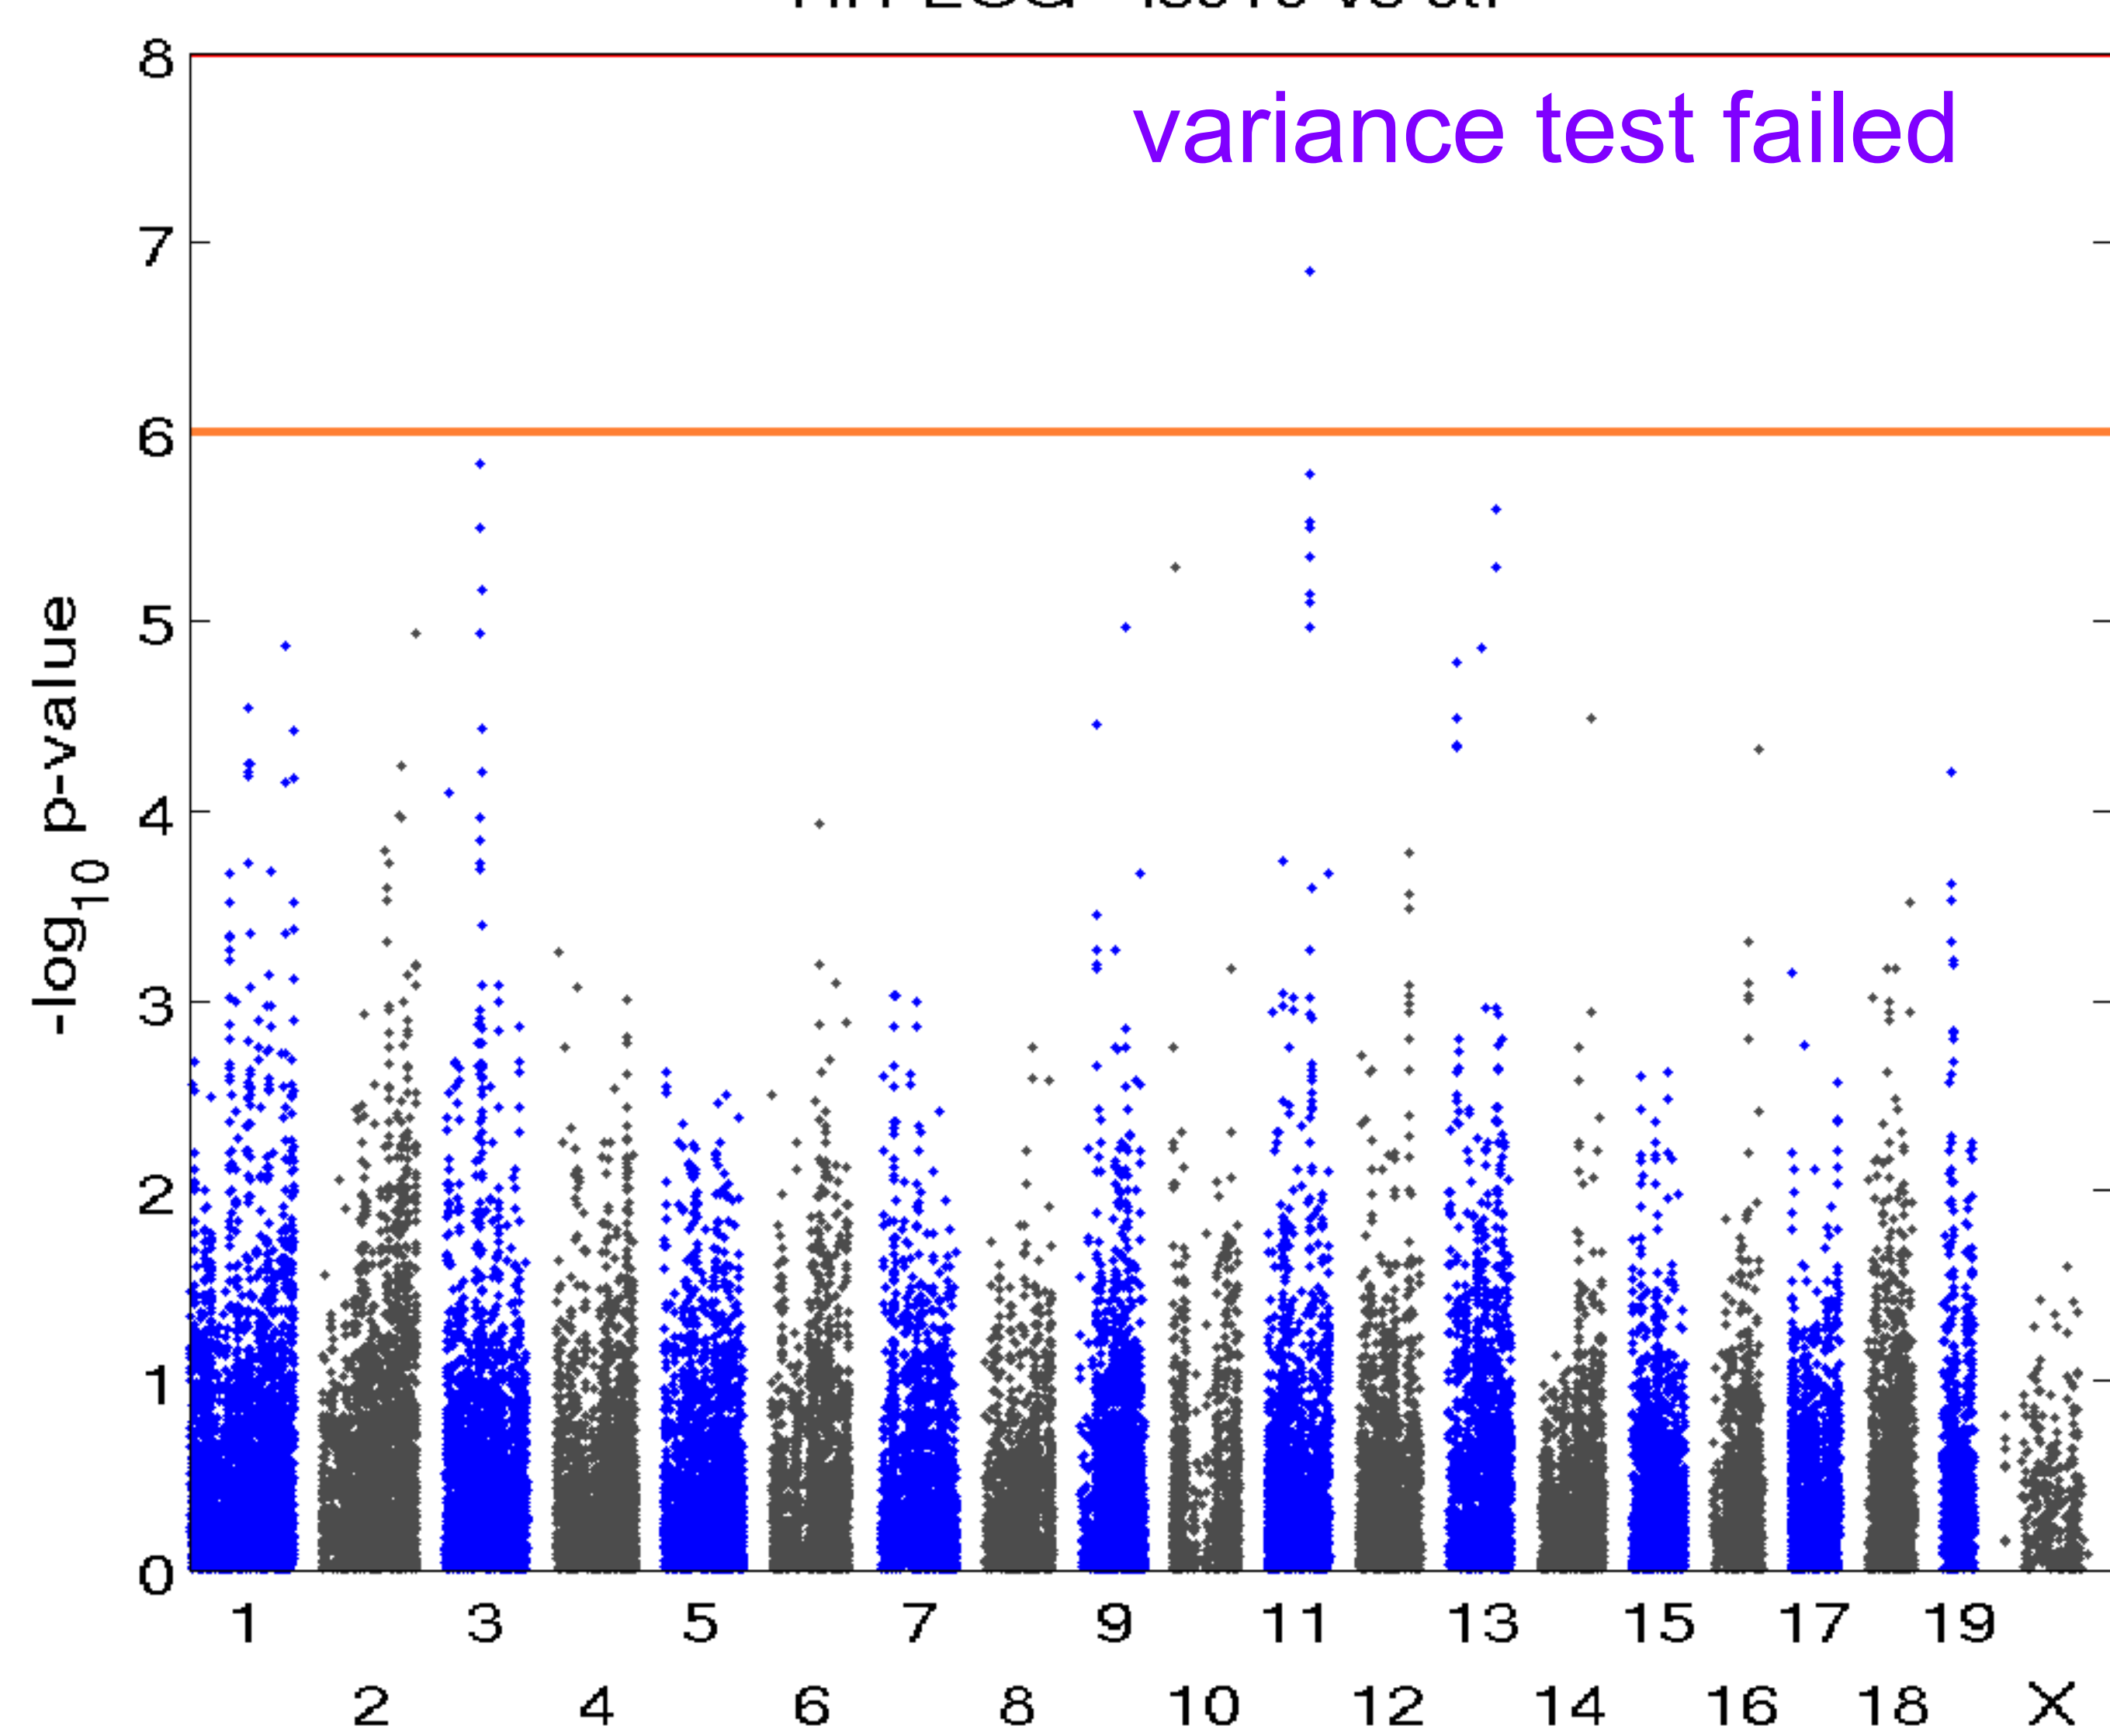

HR-ECG - iso10 vs ctr

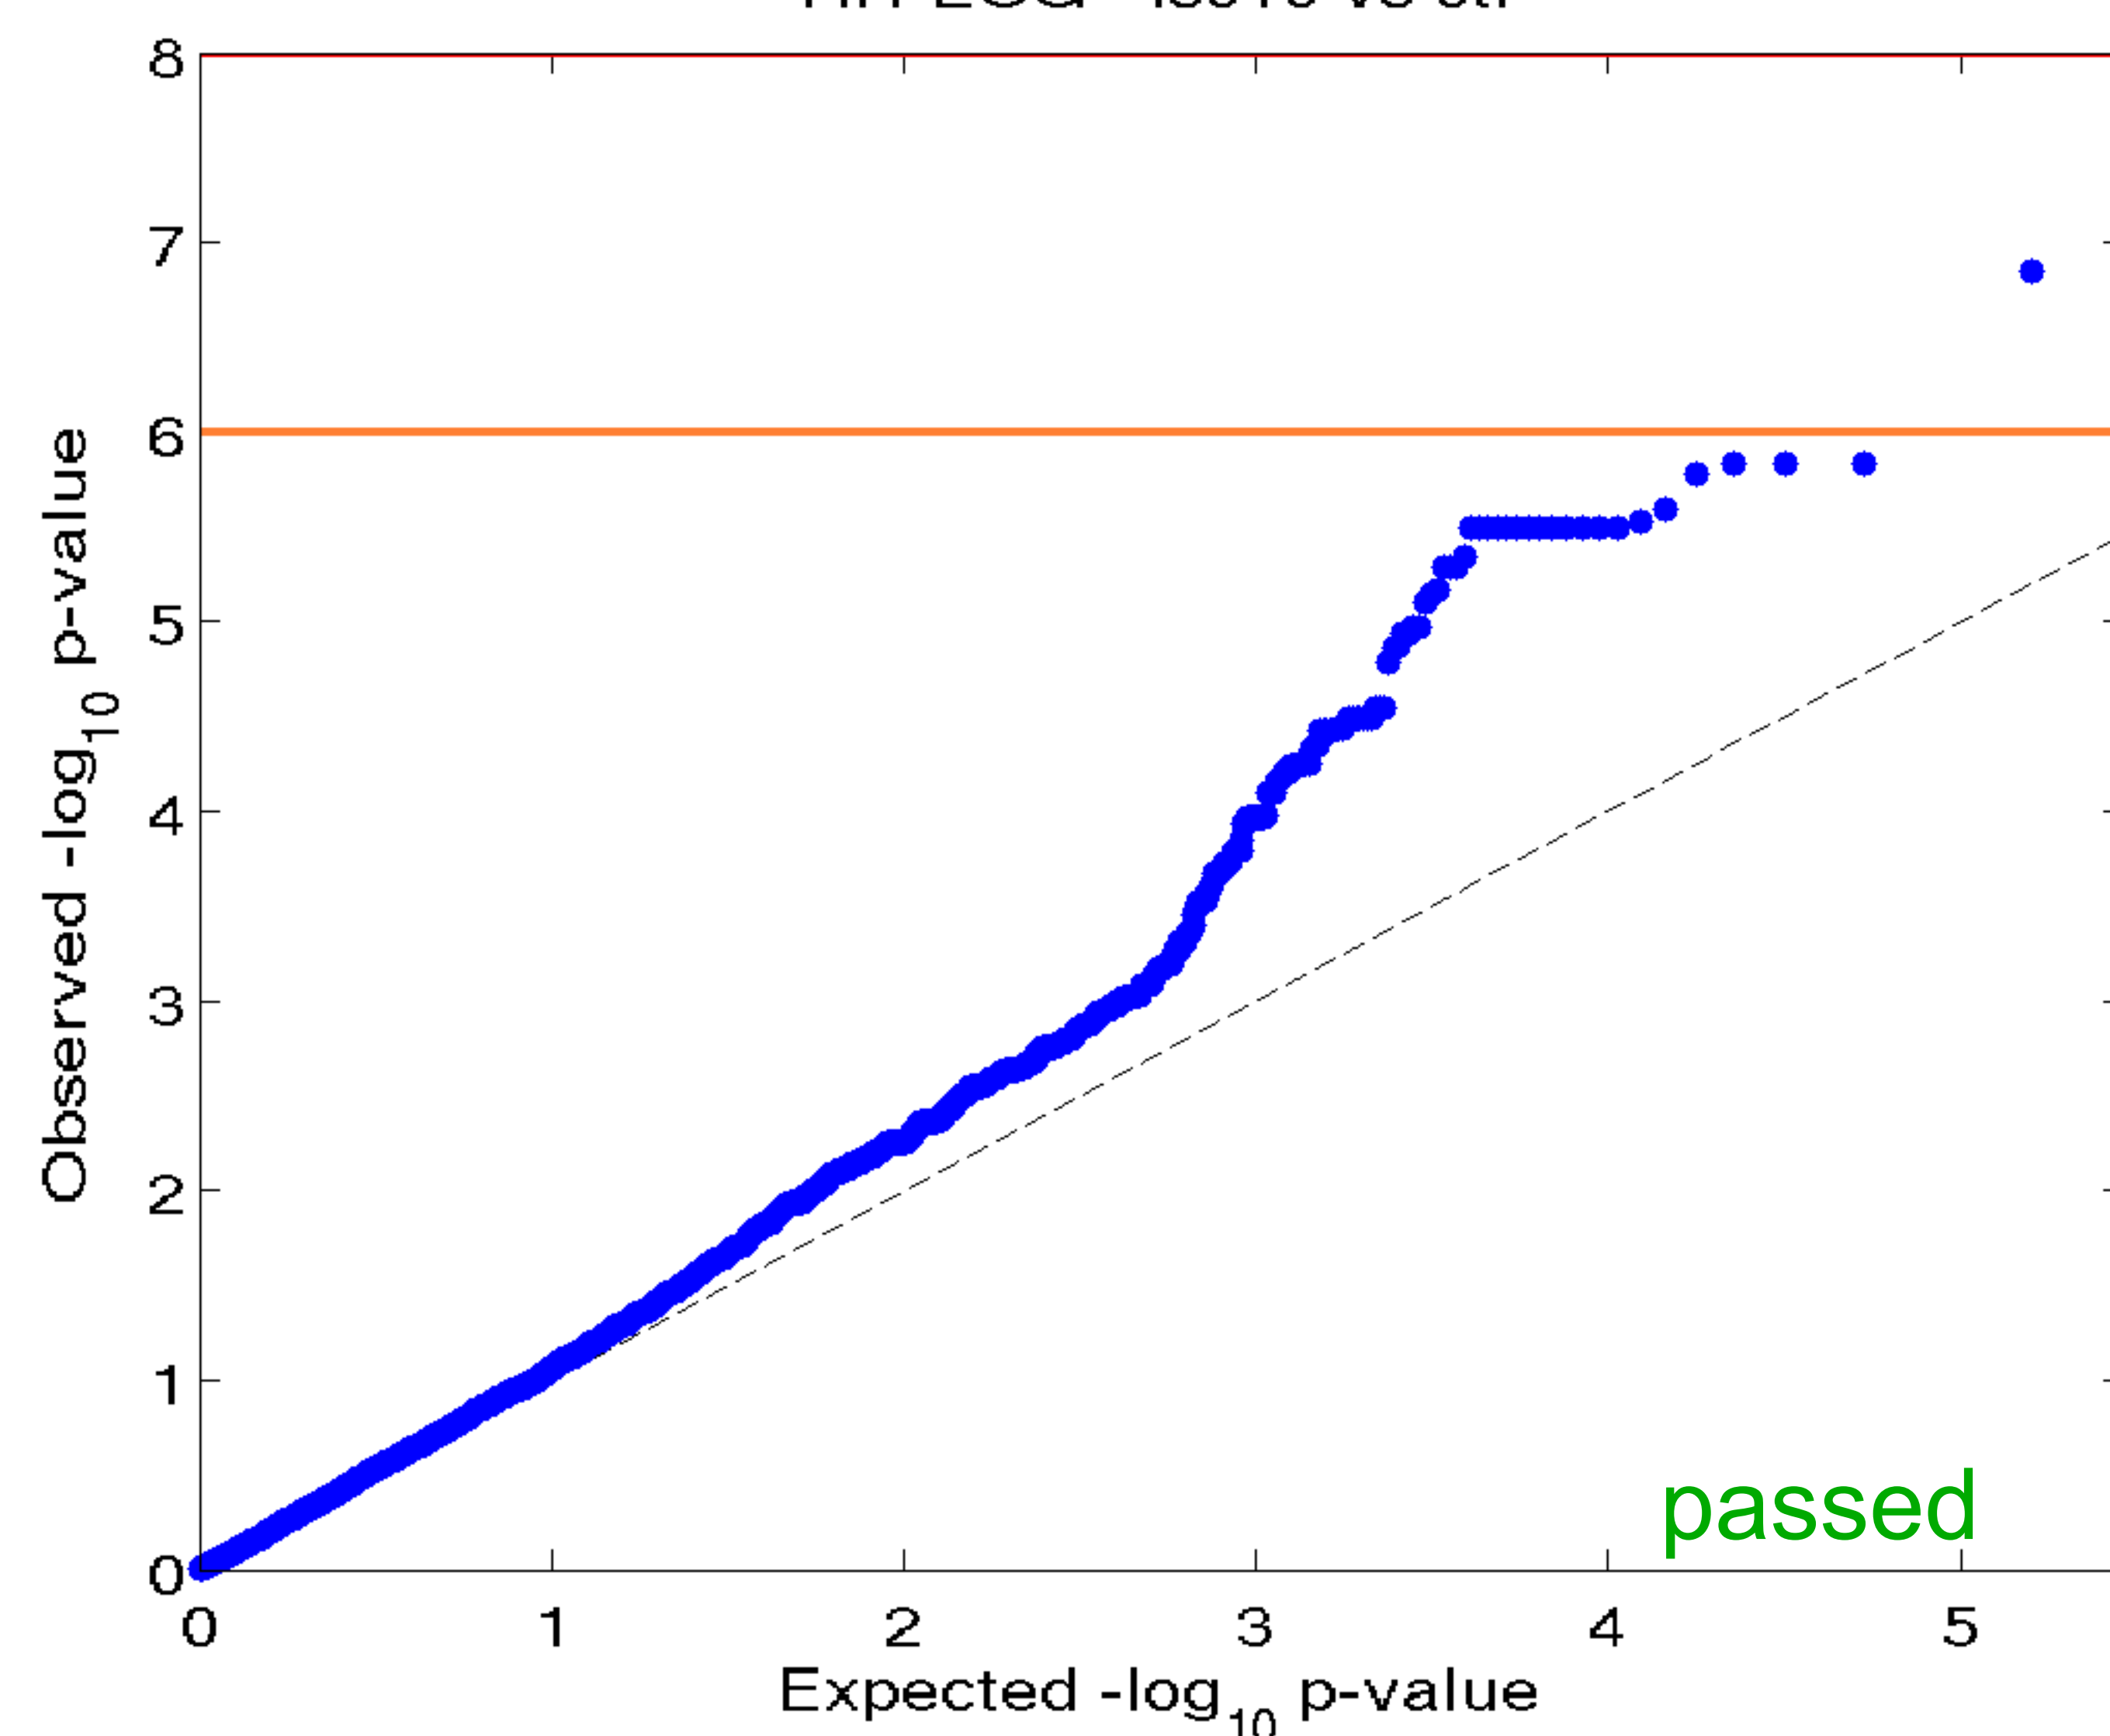

HR-TC - iso10 vs ctr

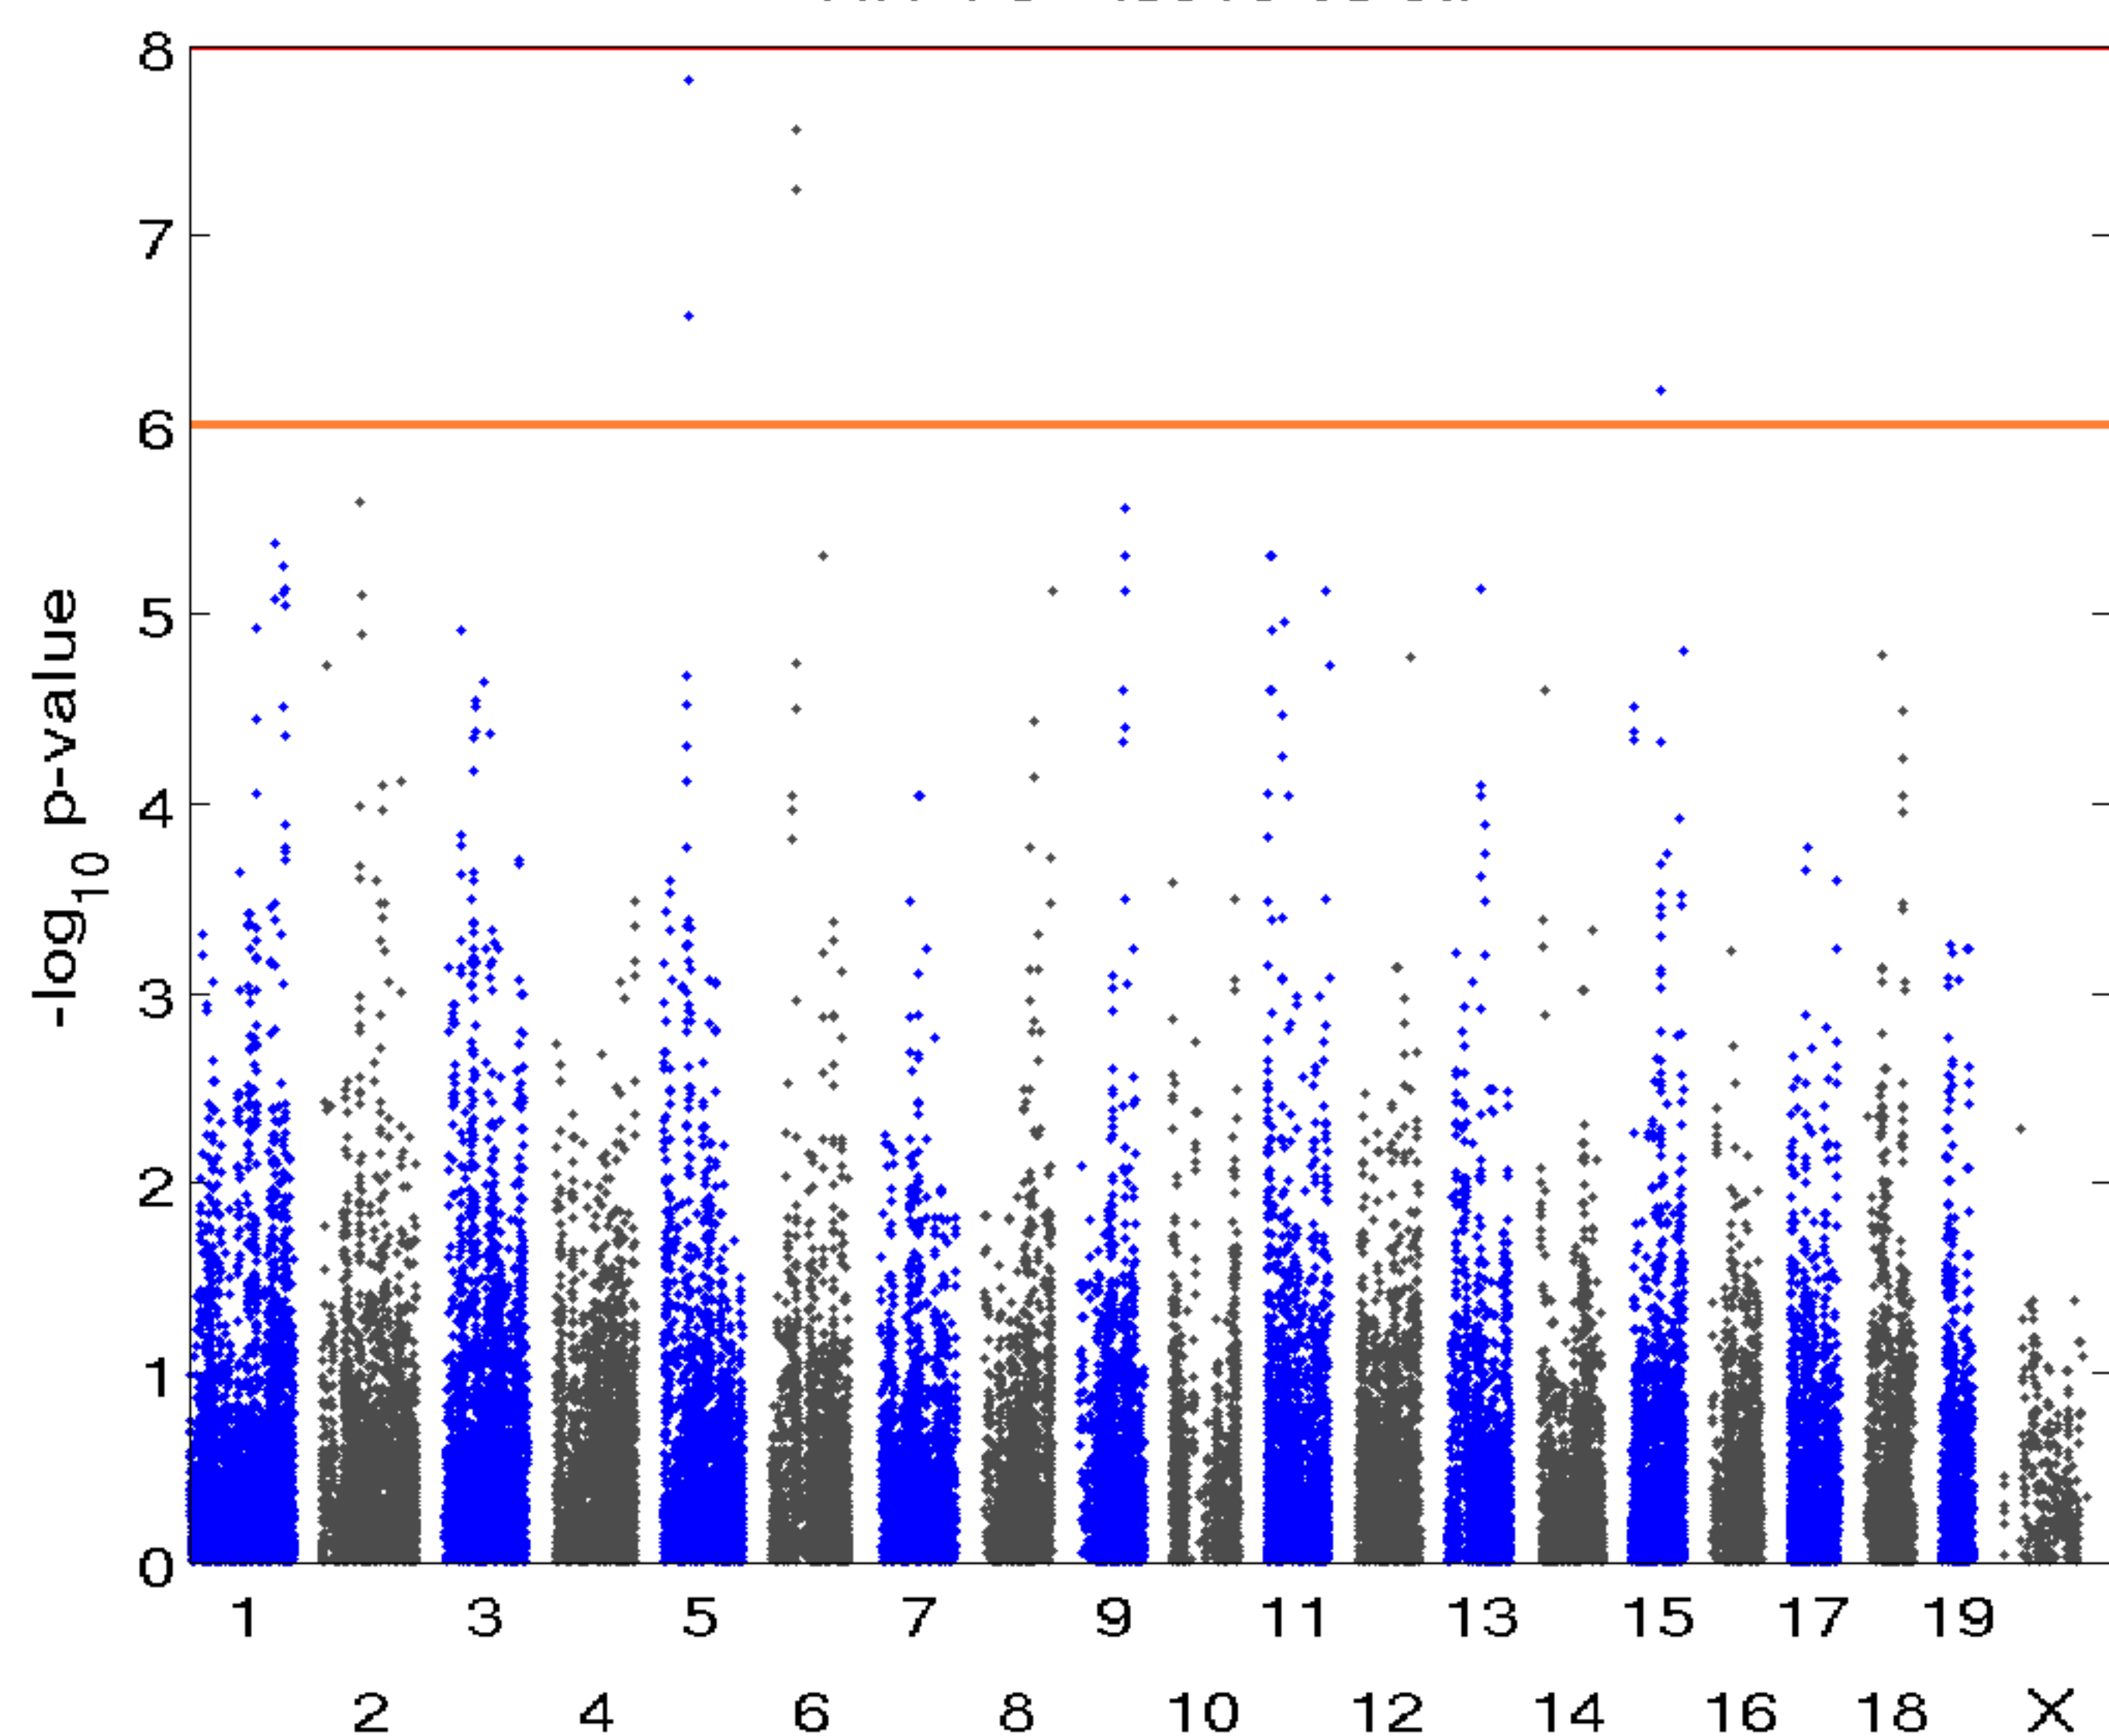

HR-TC - iso10 vs ctr

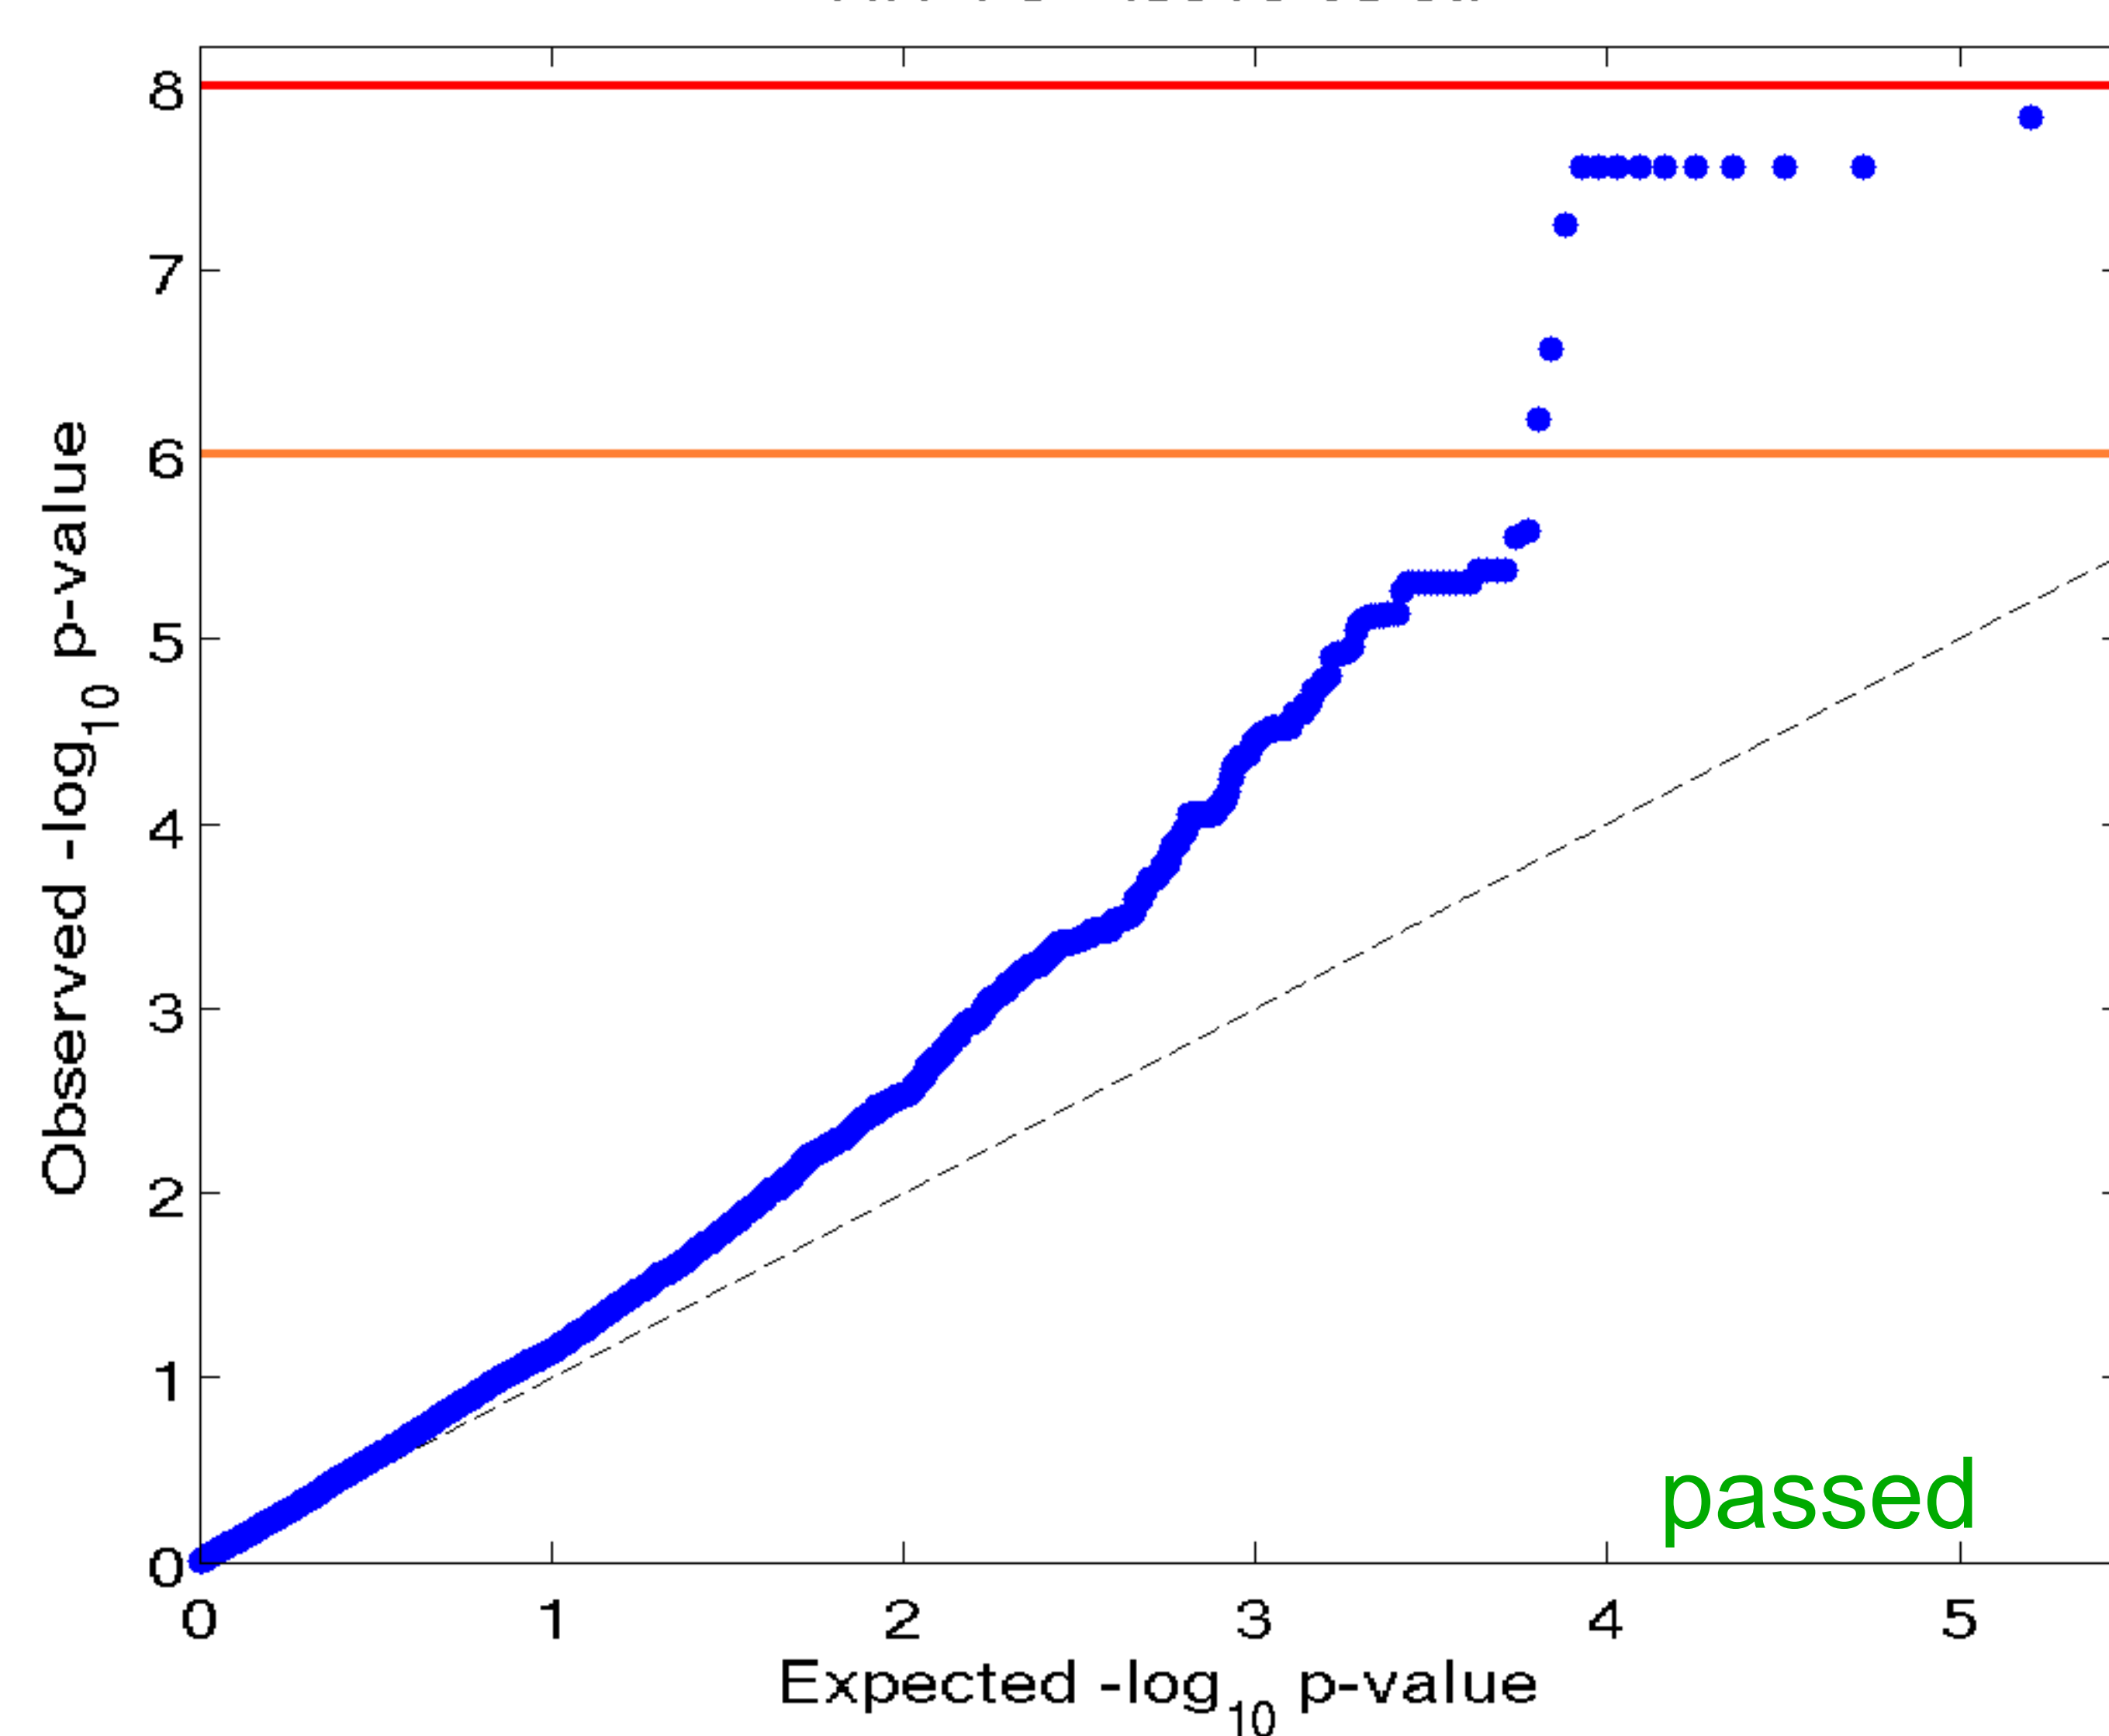

HW - iso10 vs ctr

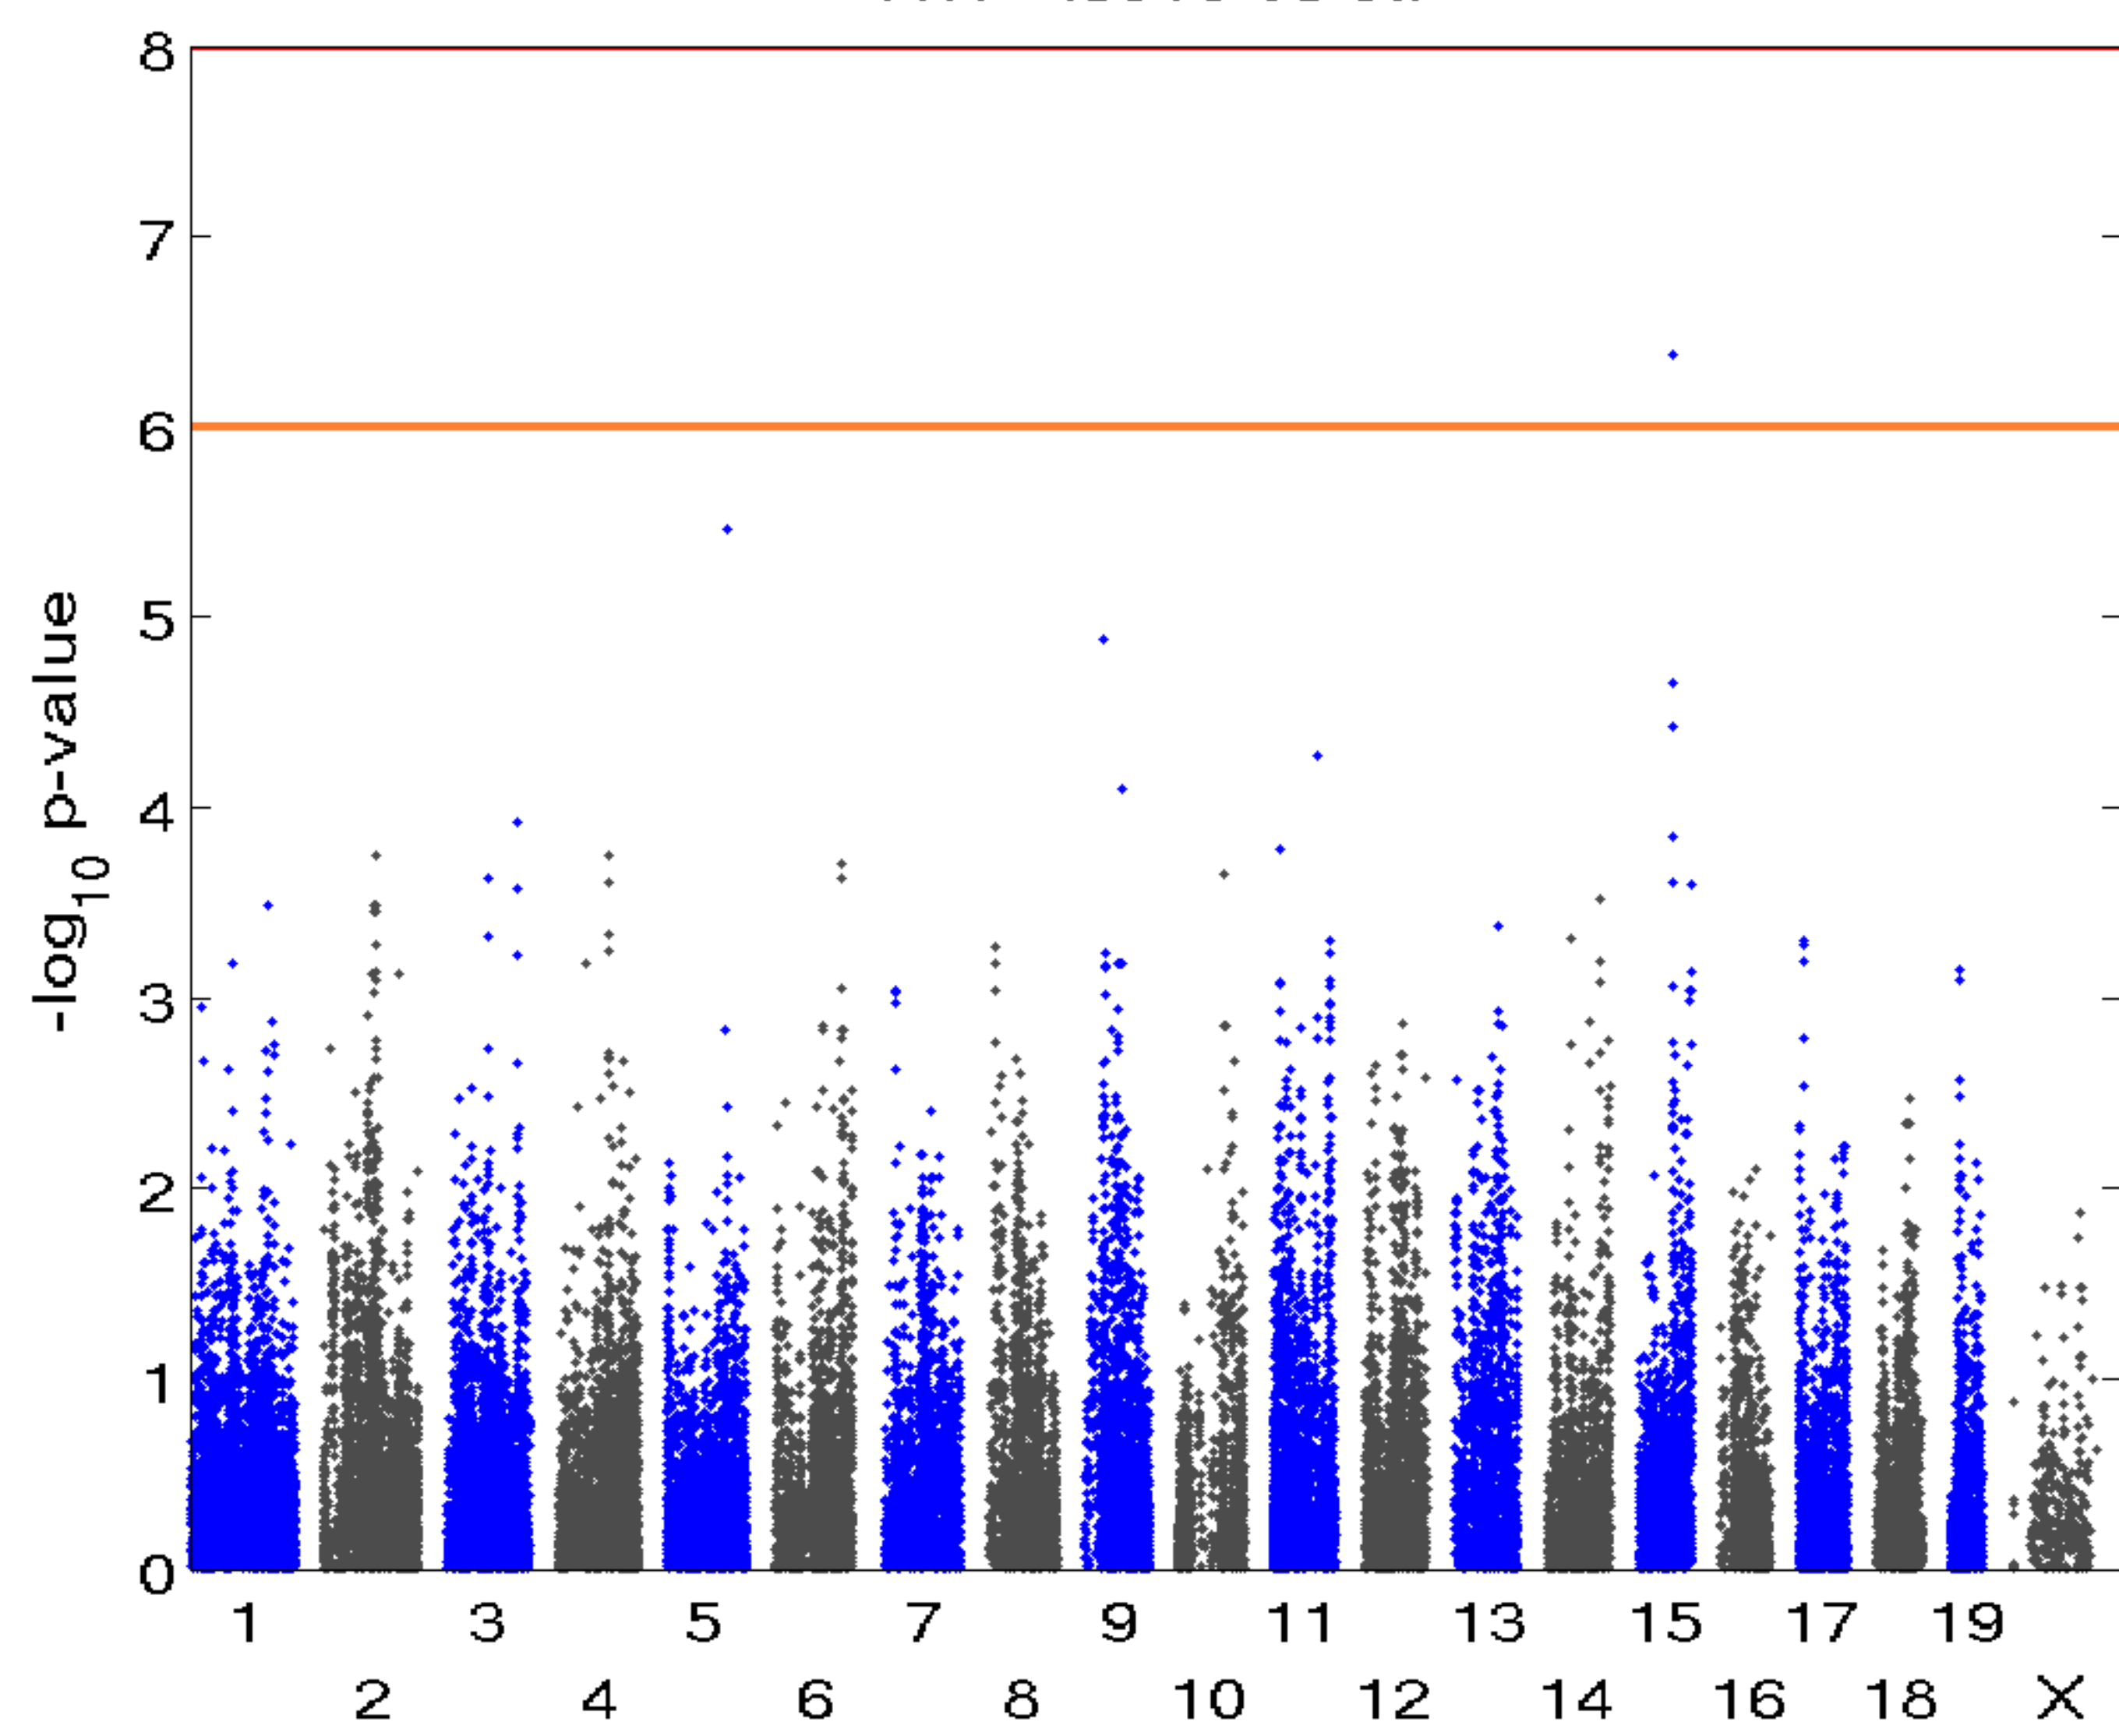

HW - iso10 vs ctr

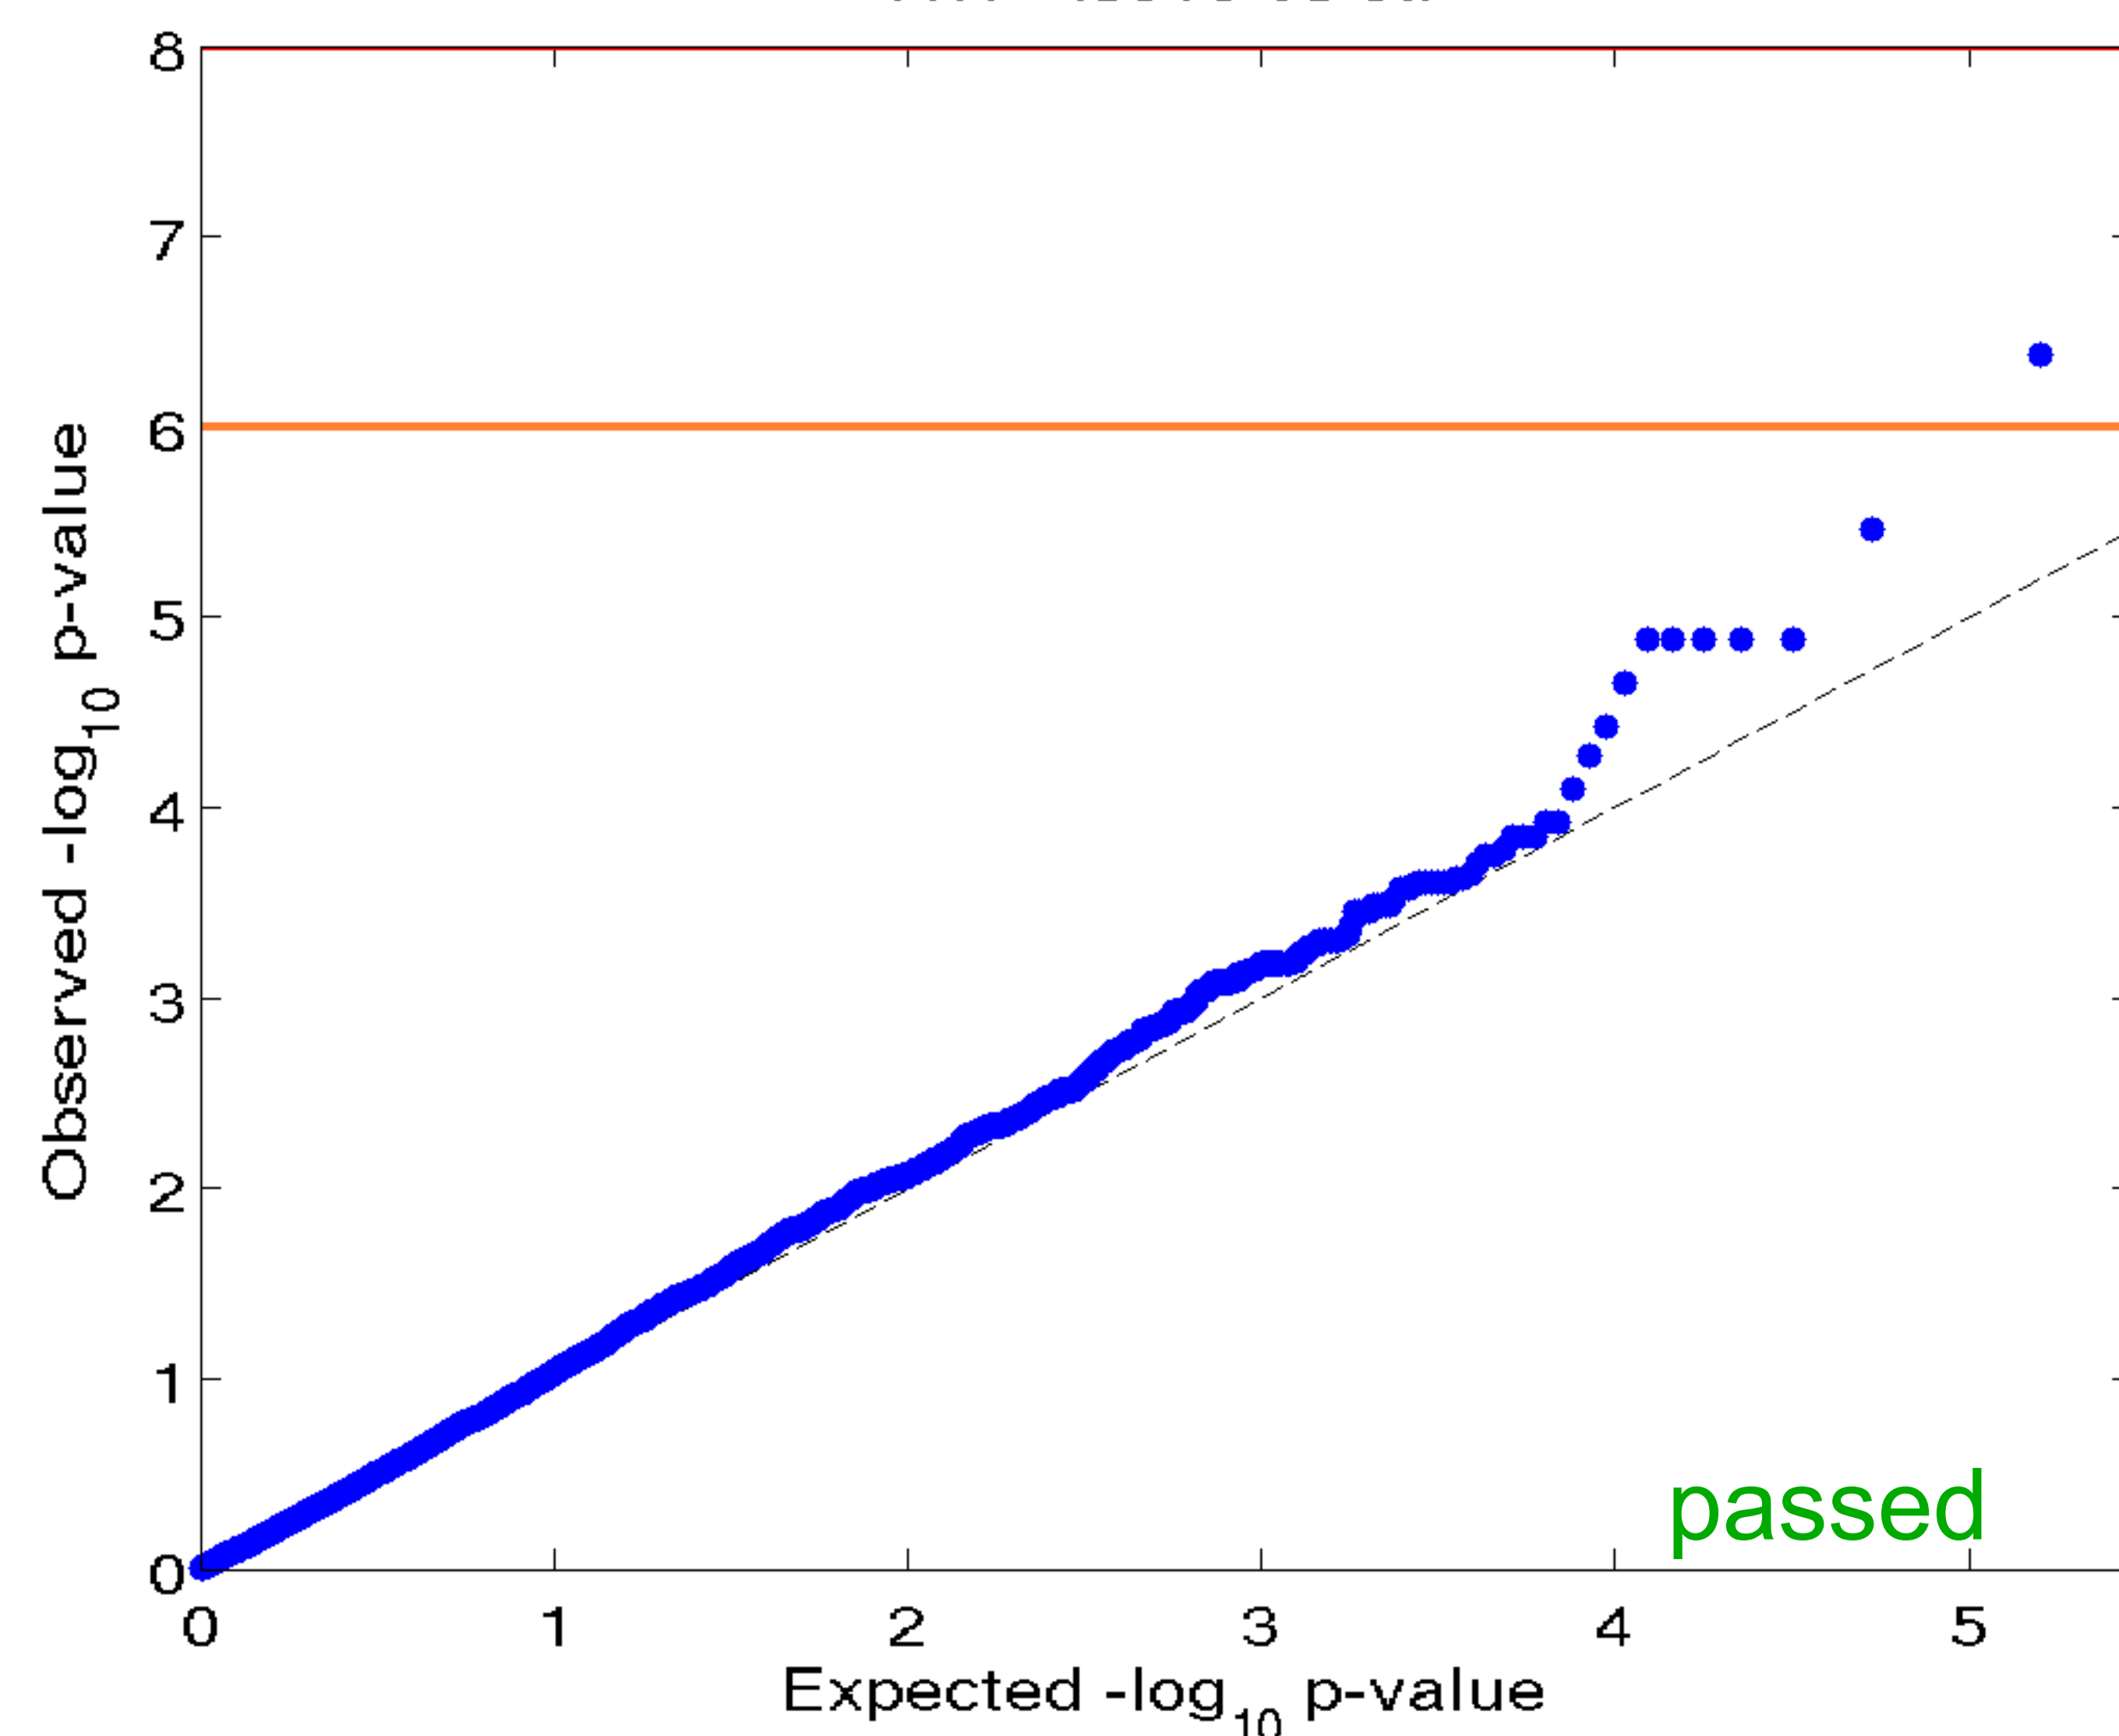

Pamp - iso10 vs ctr

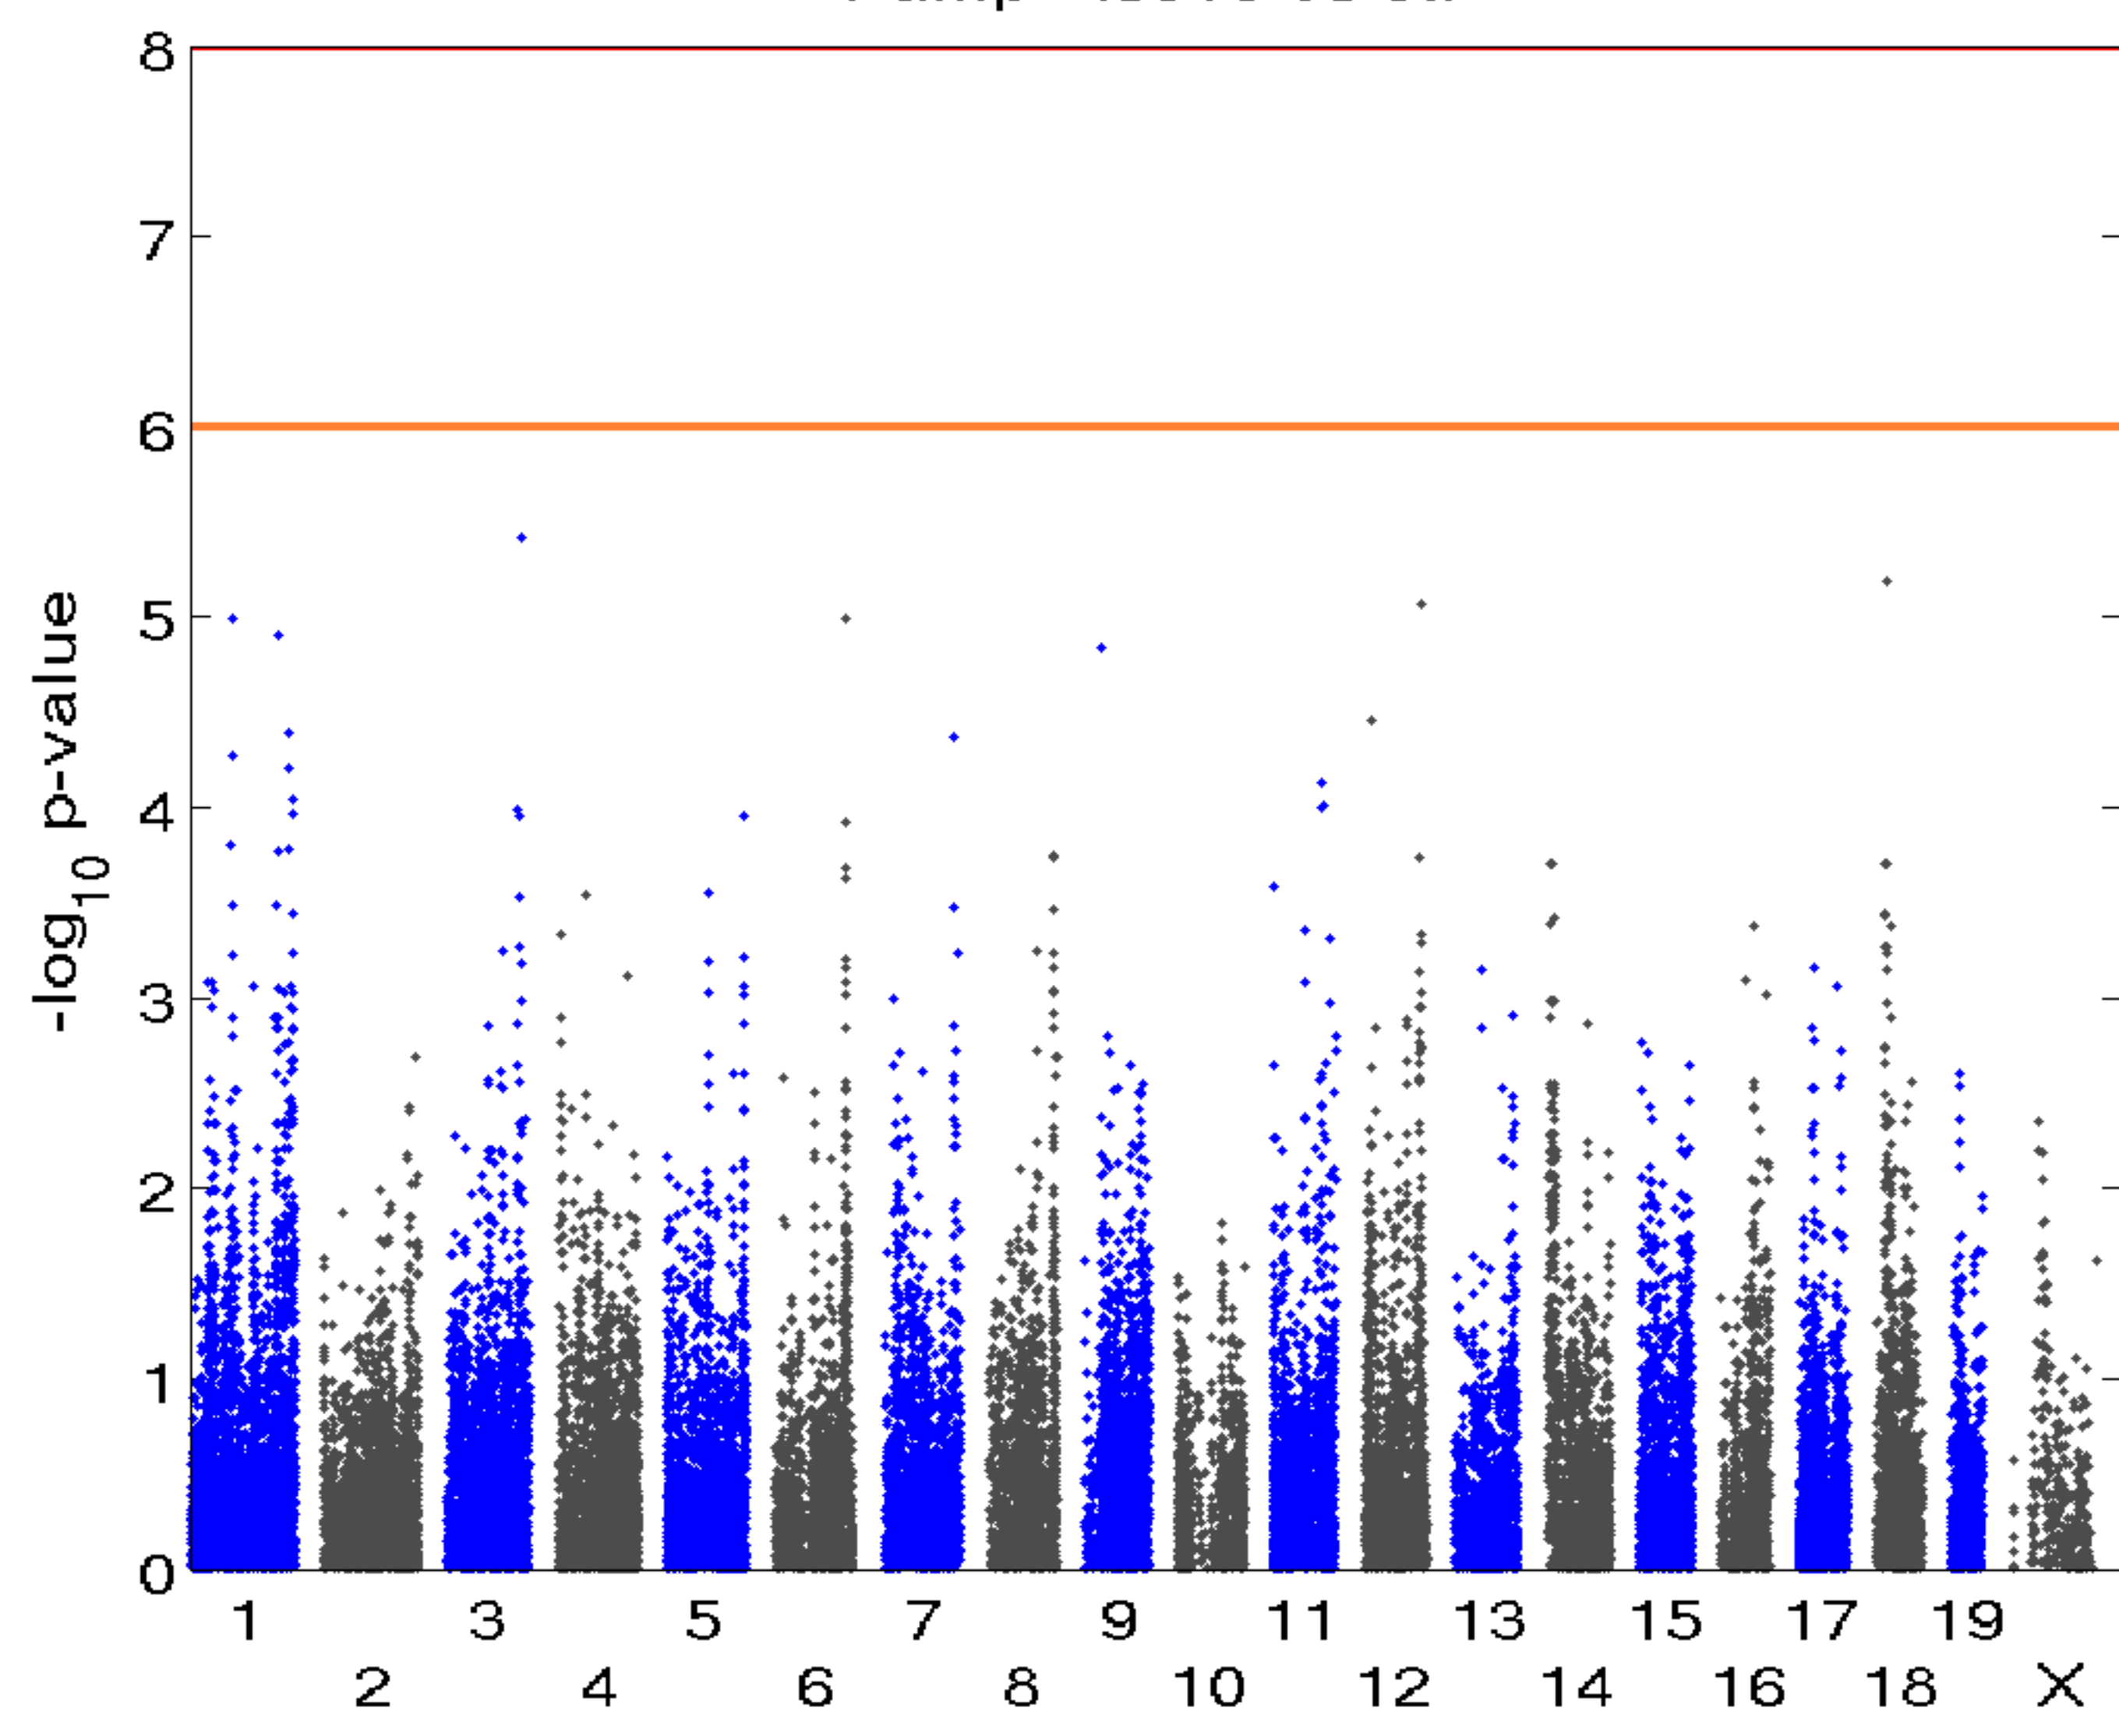

Pamp - iso10 vs ctr

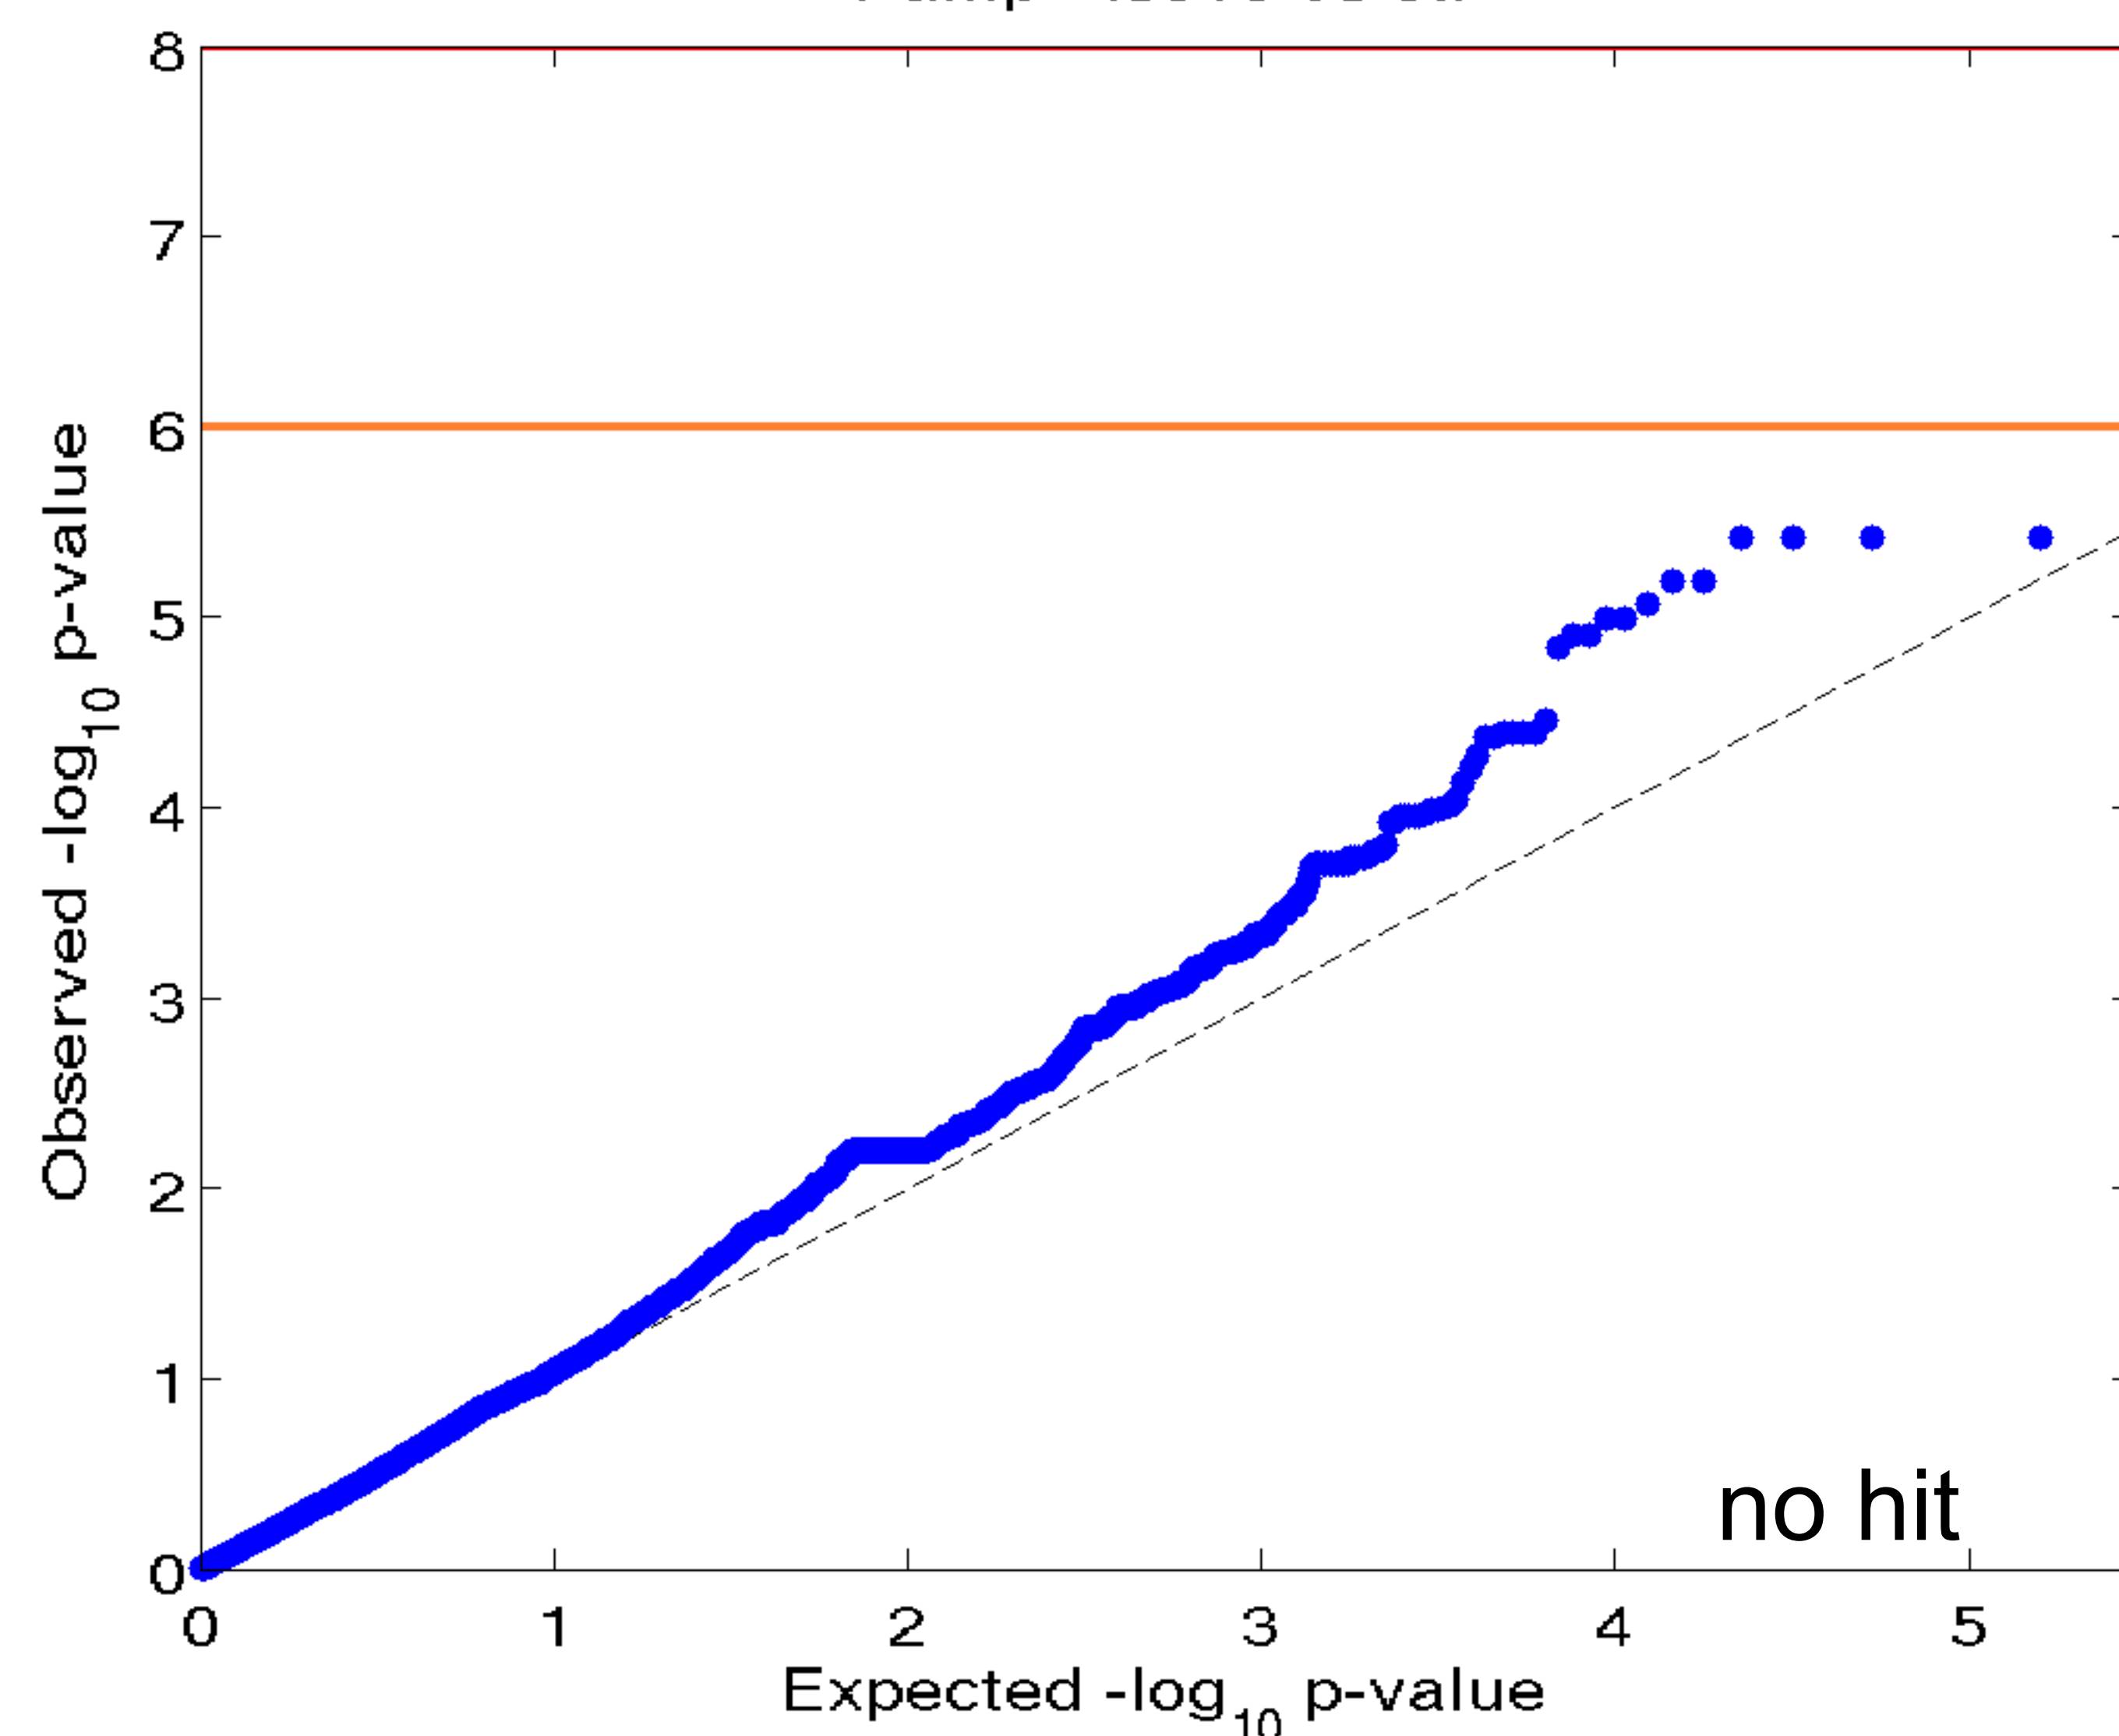



Parea - iso10 vs ctr

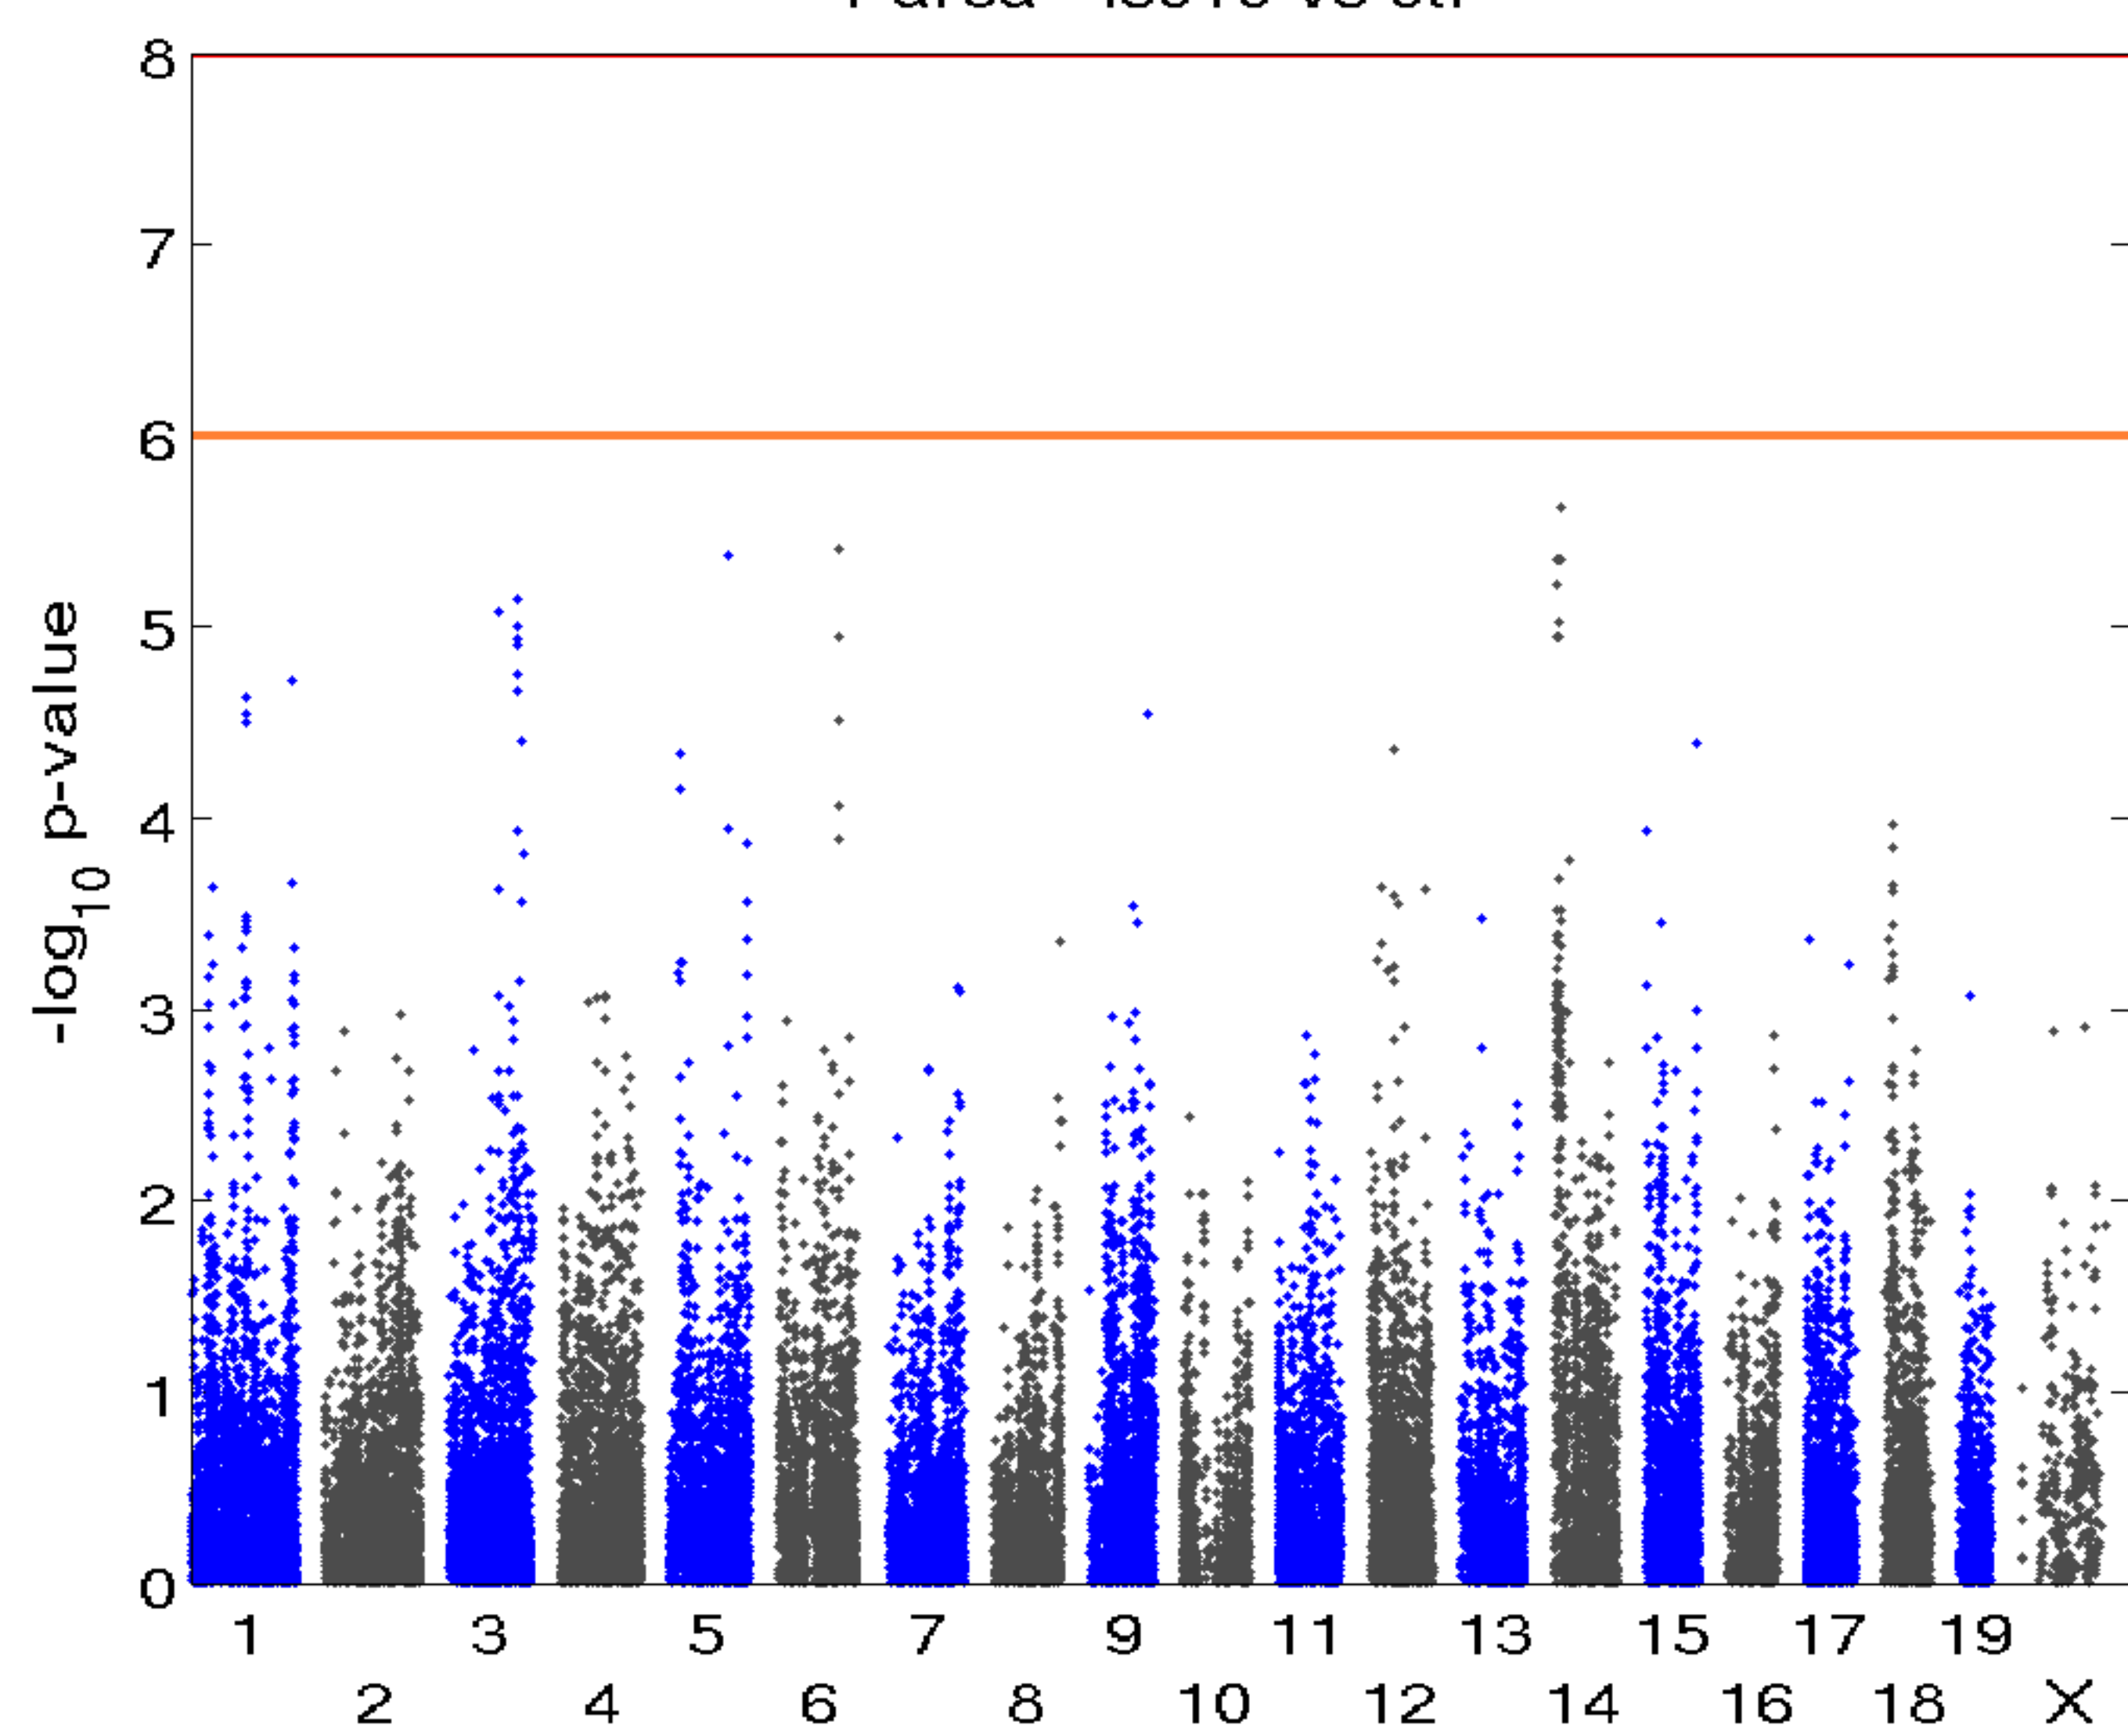

Parea - iso10 vs ctr

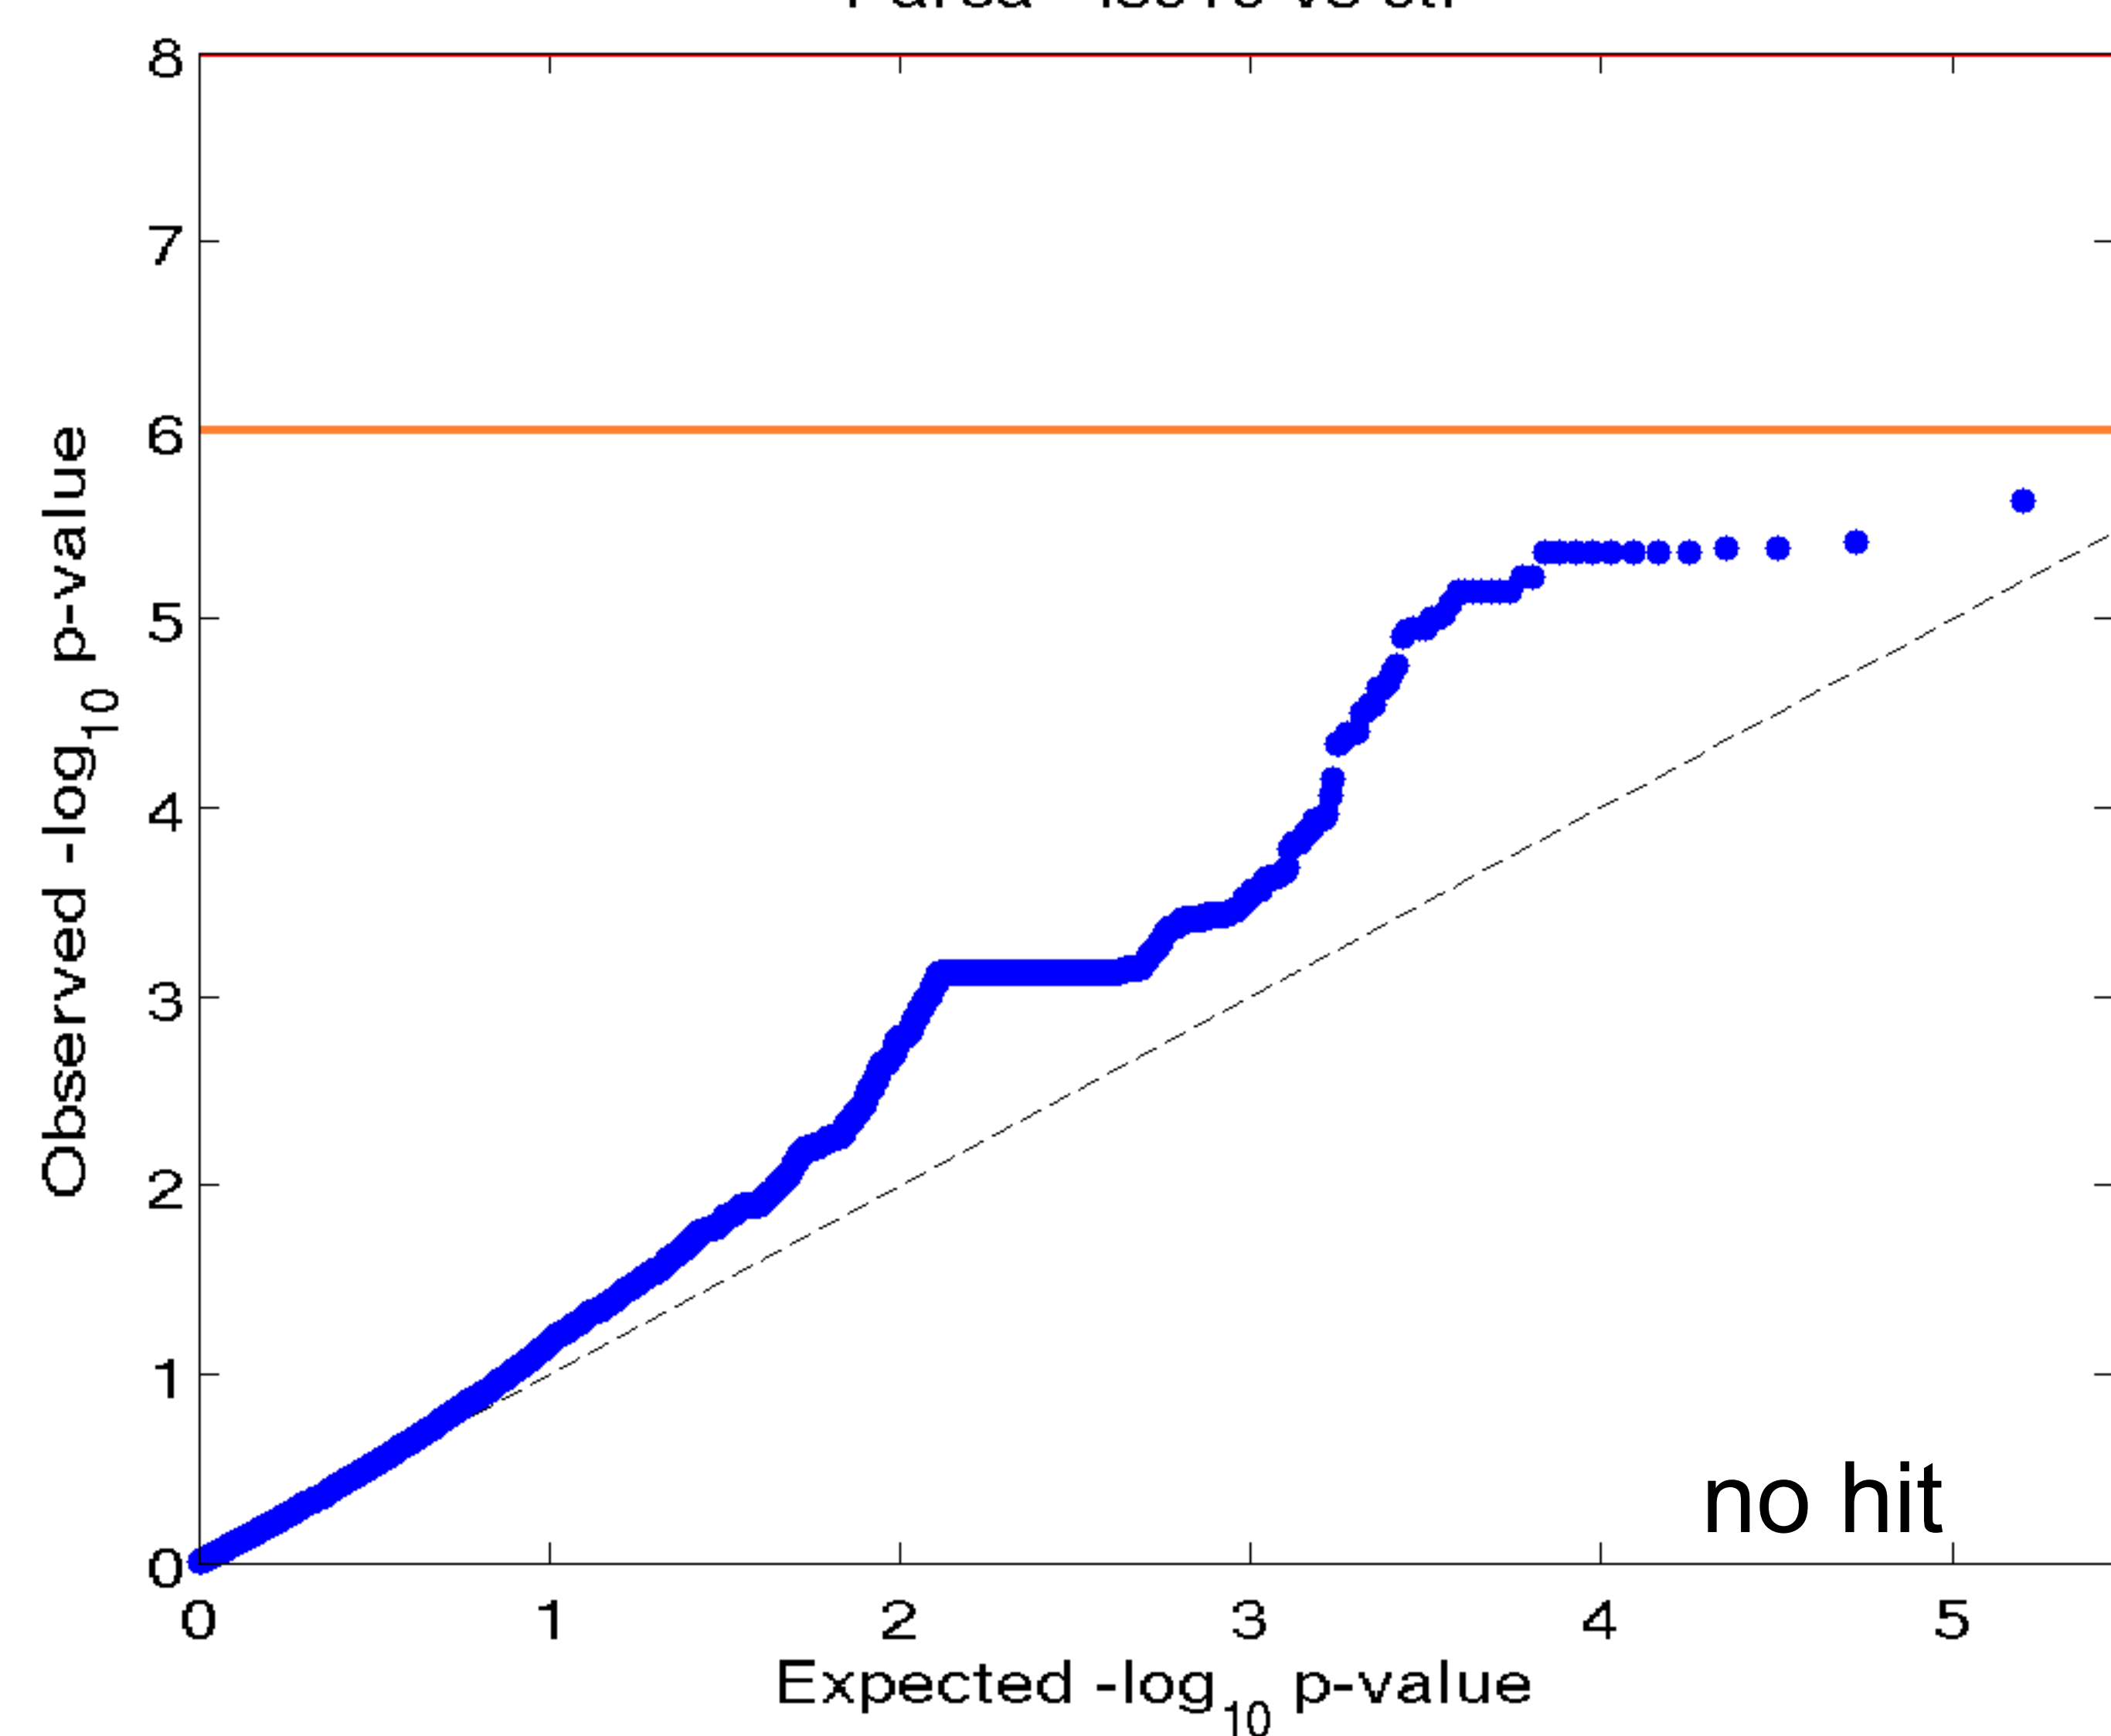

Pdur - iso10 vs ctr

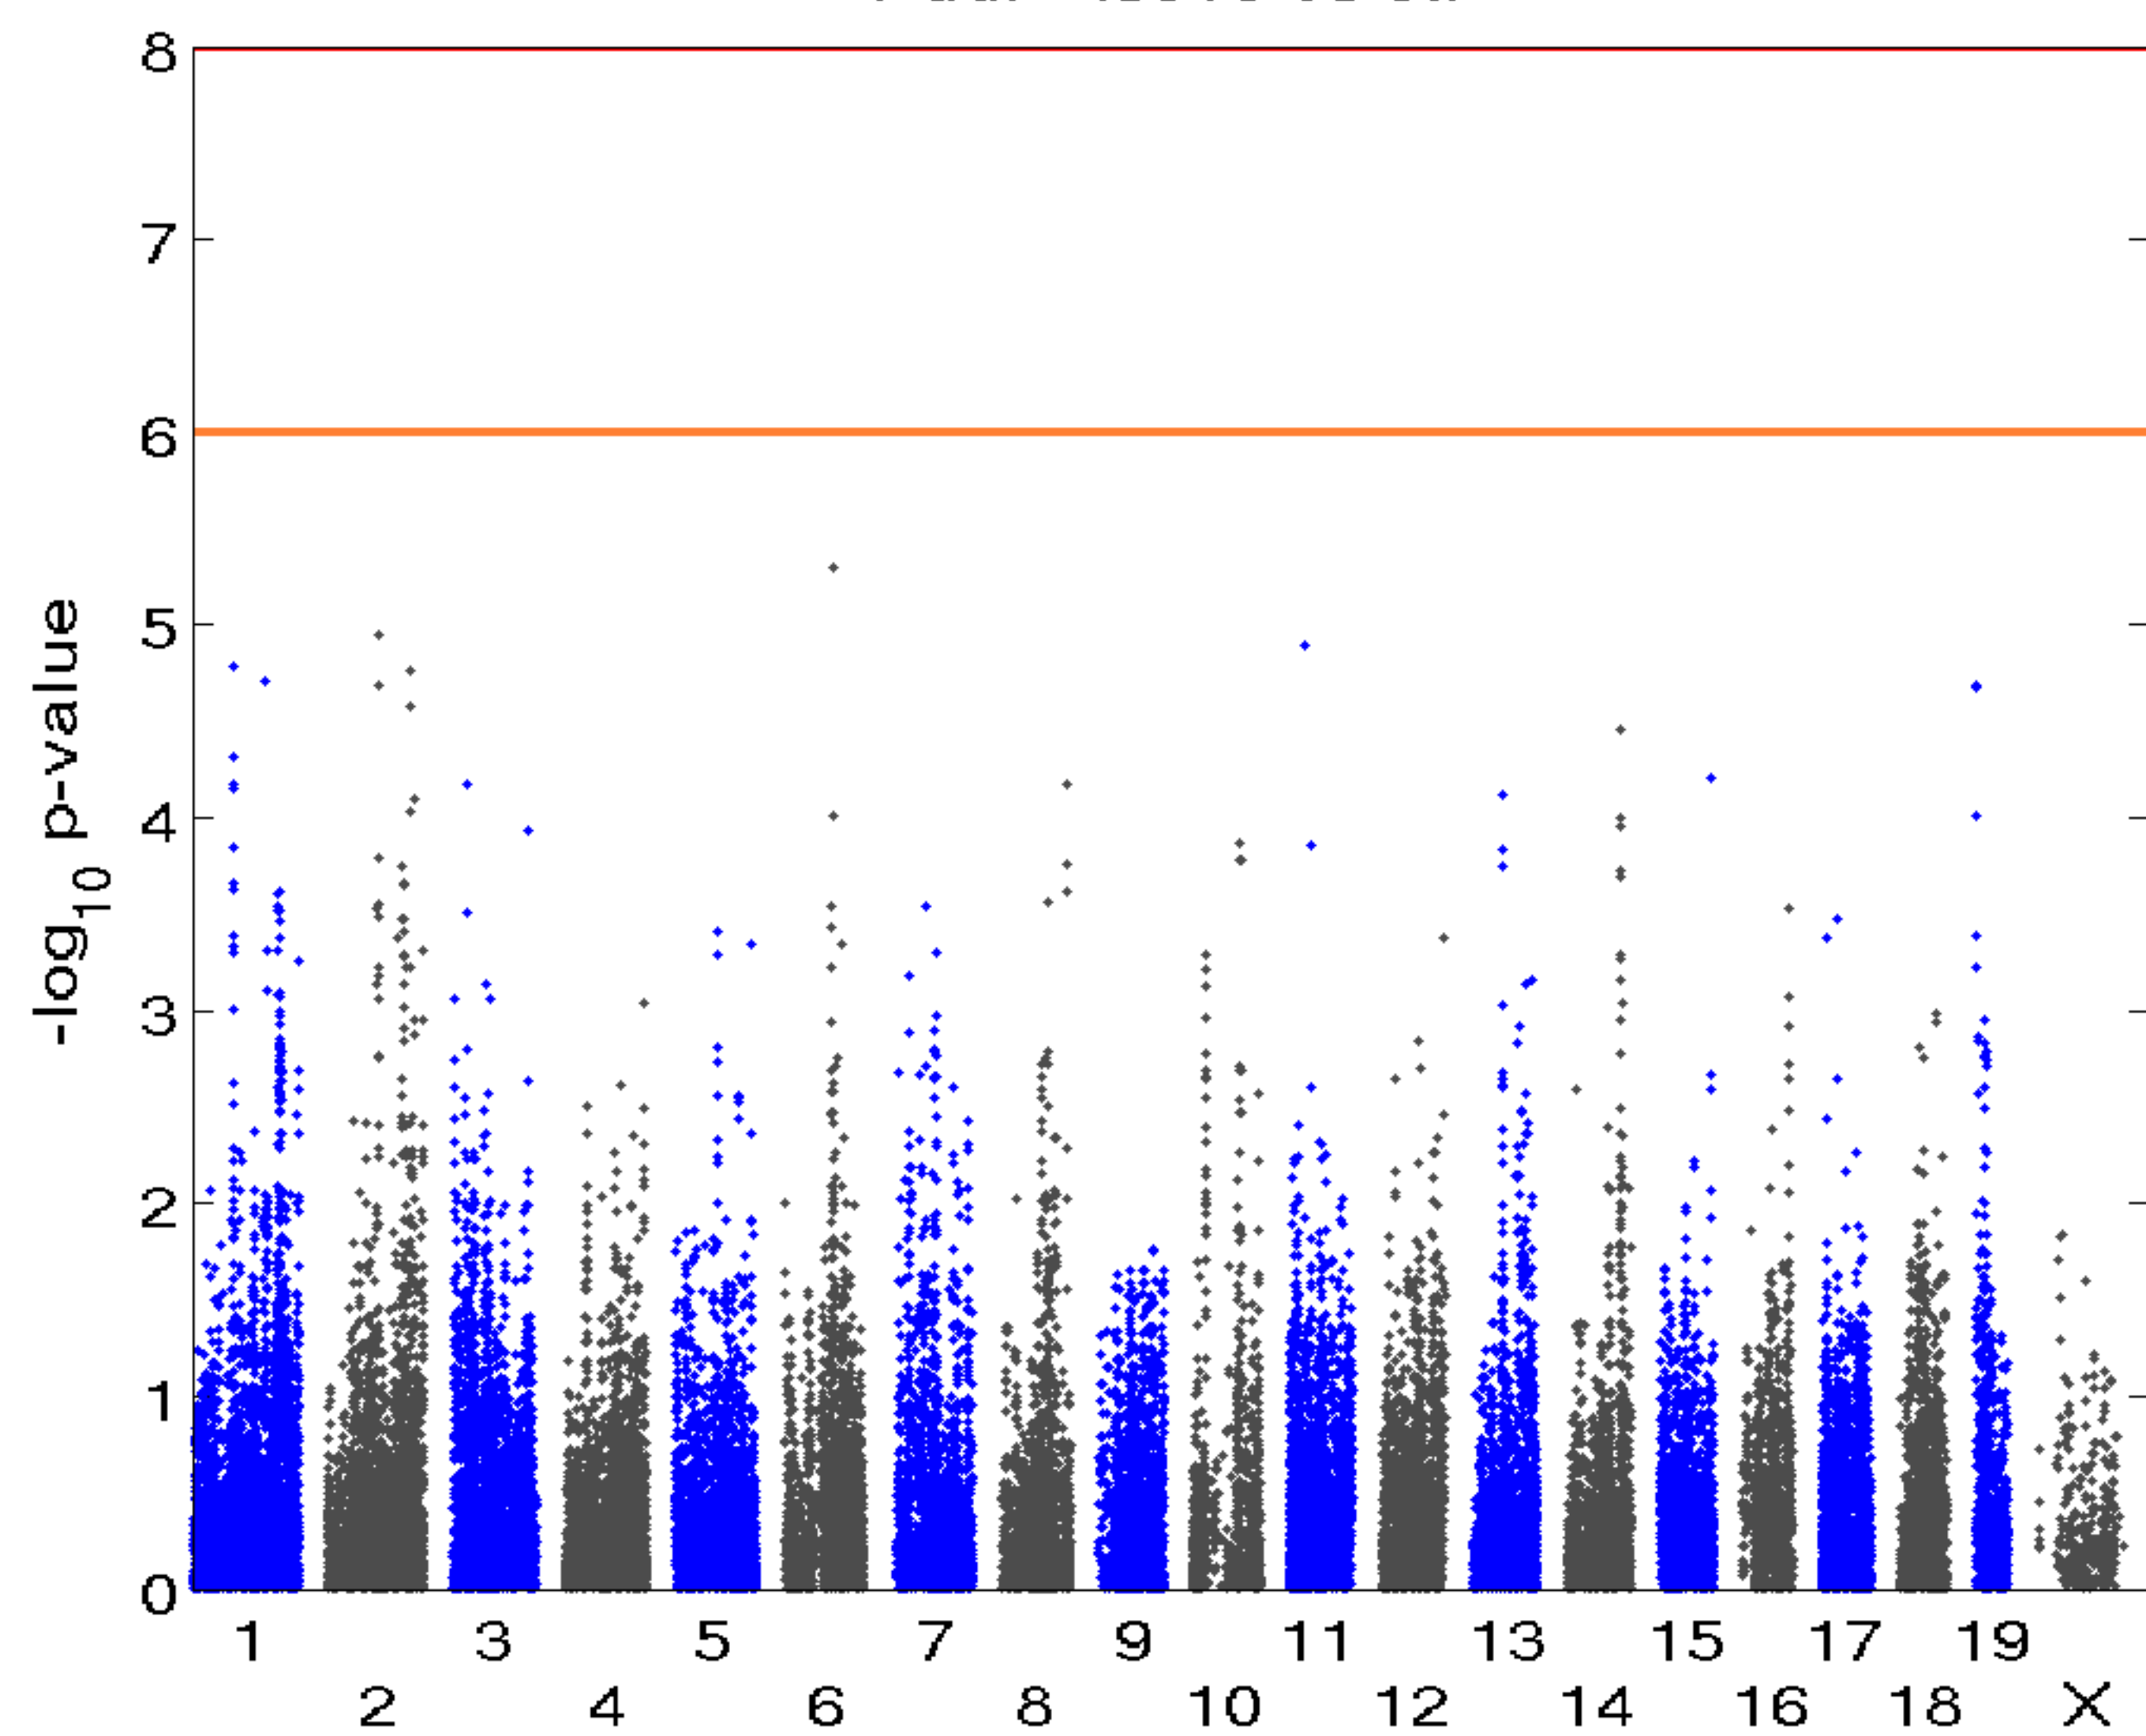

Pdur - iso10 vs ctr

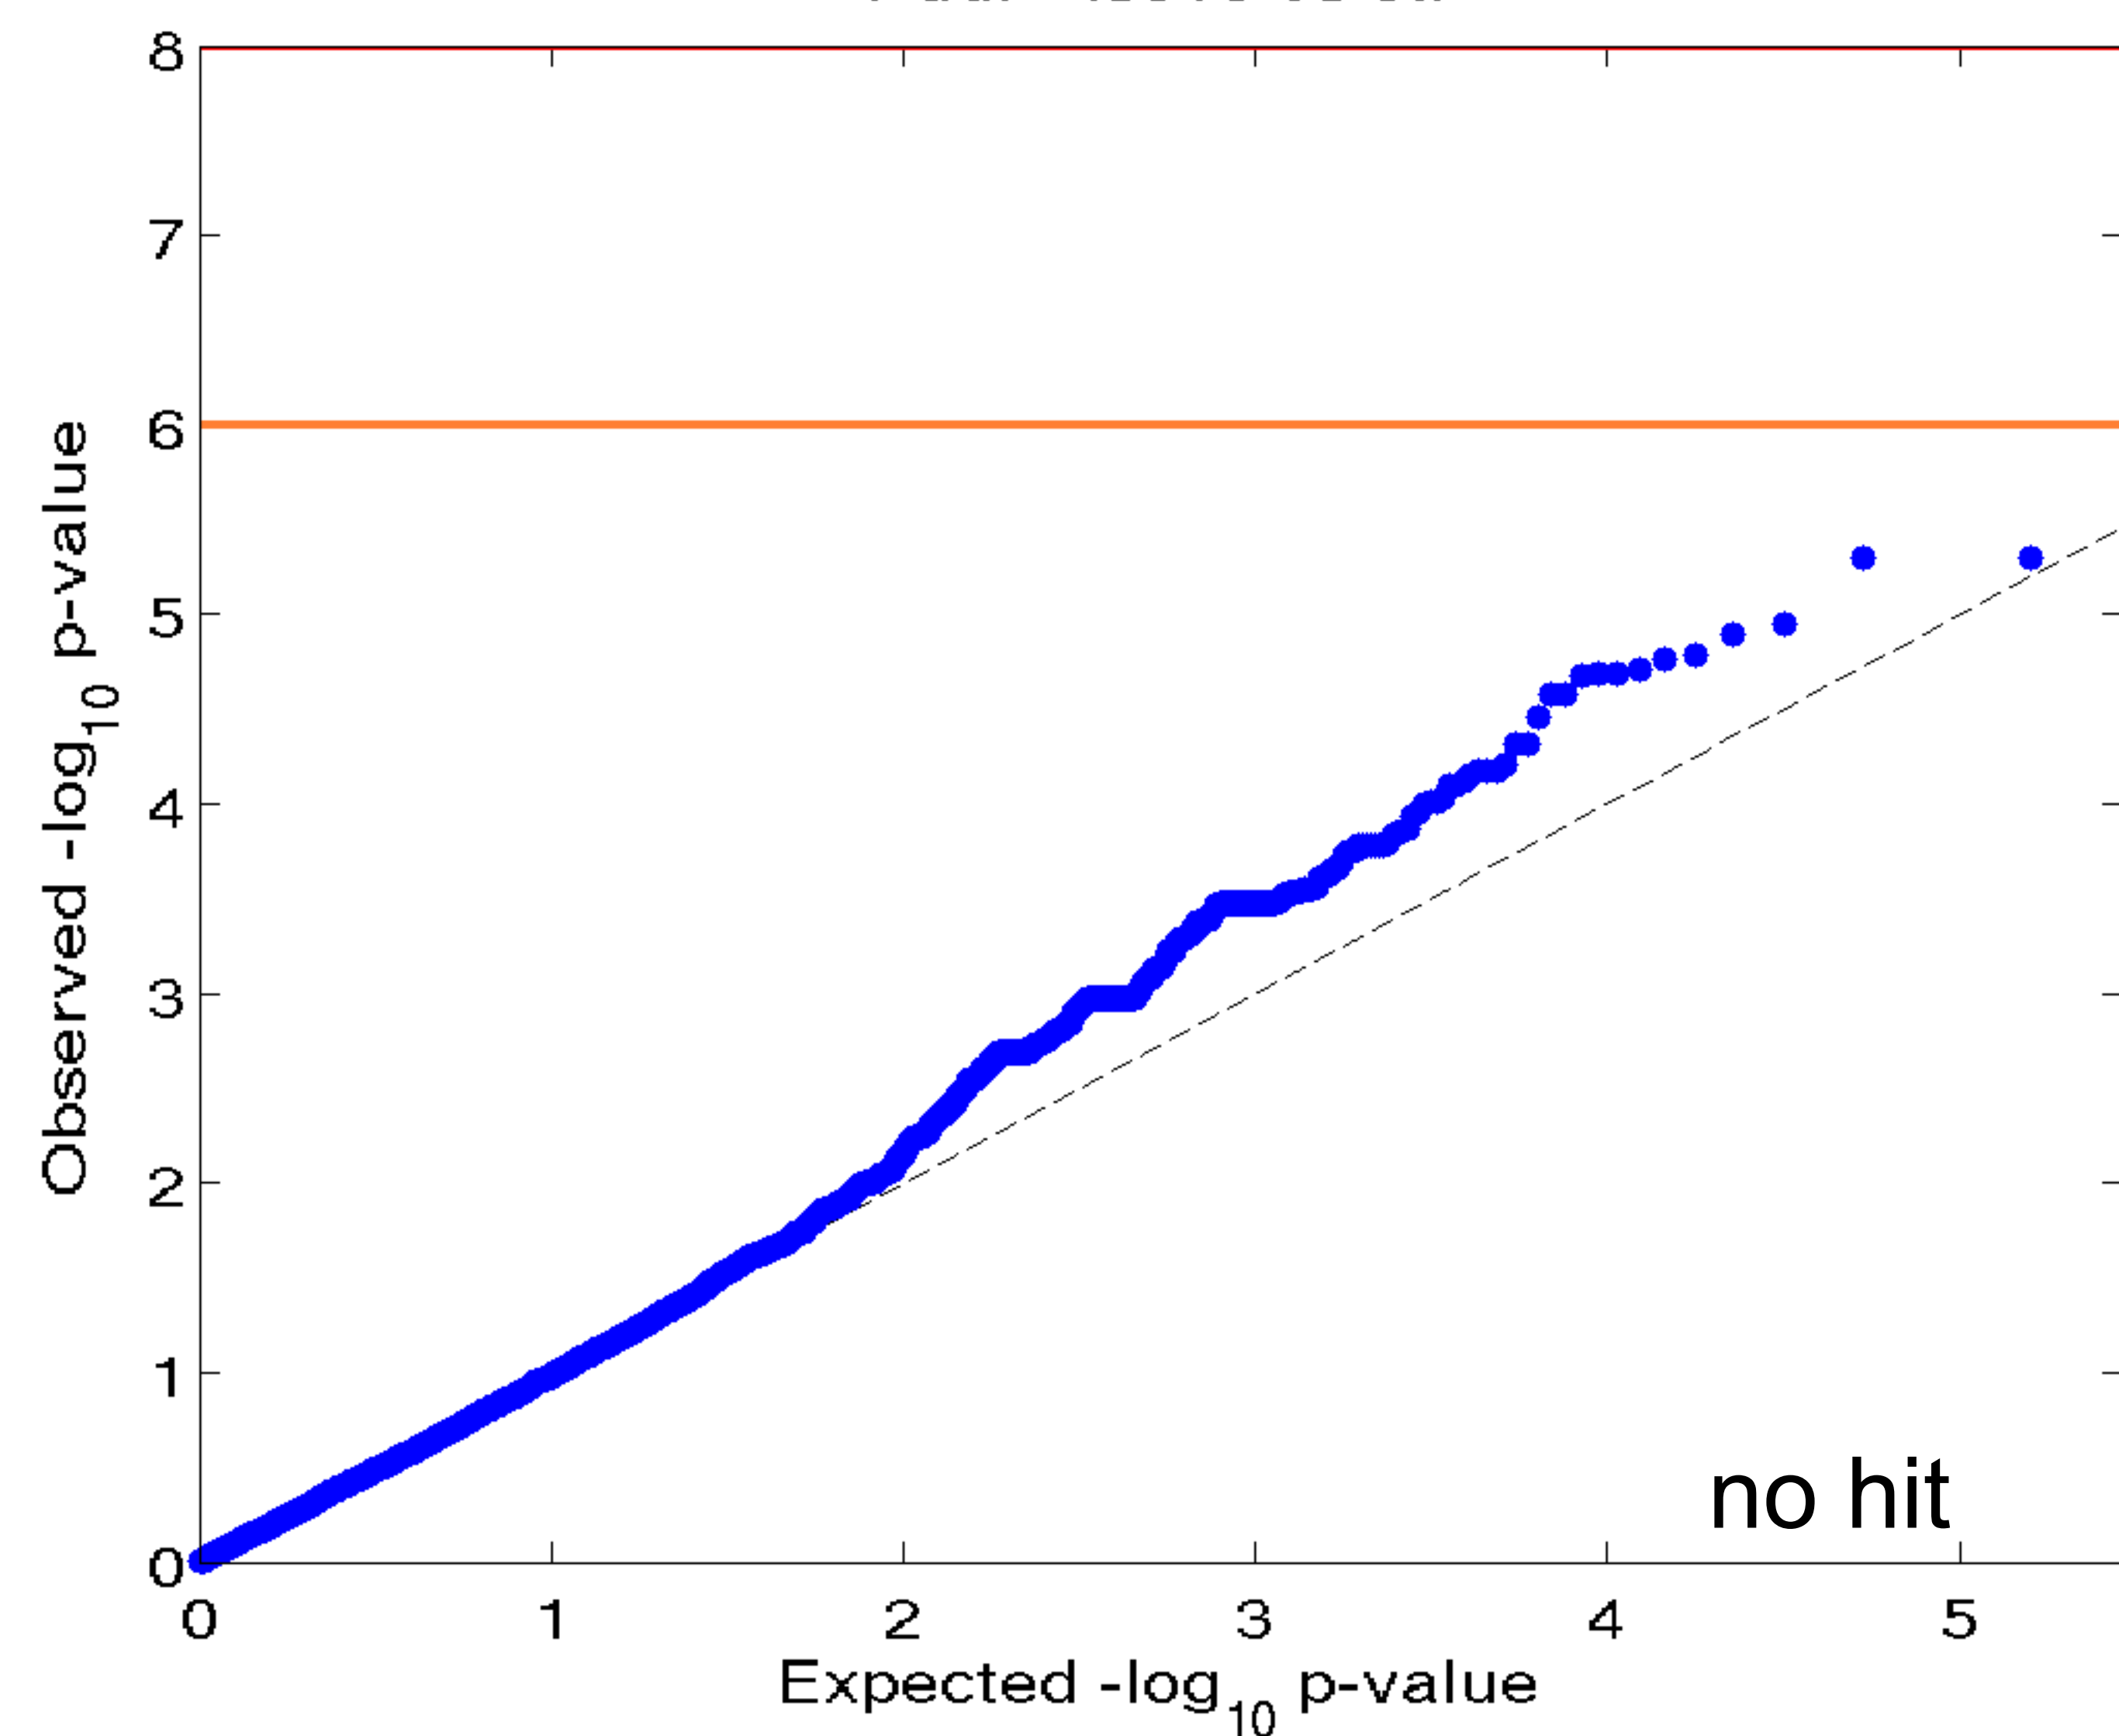

PR - iso10 vs ctr

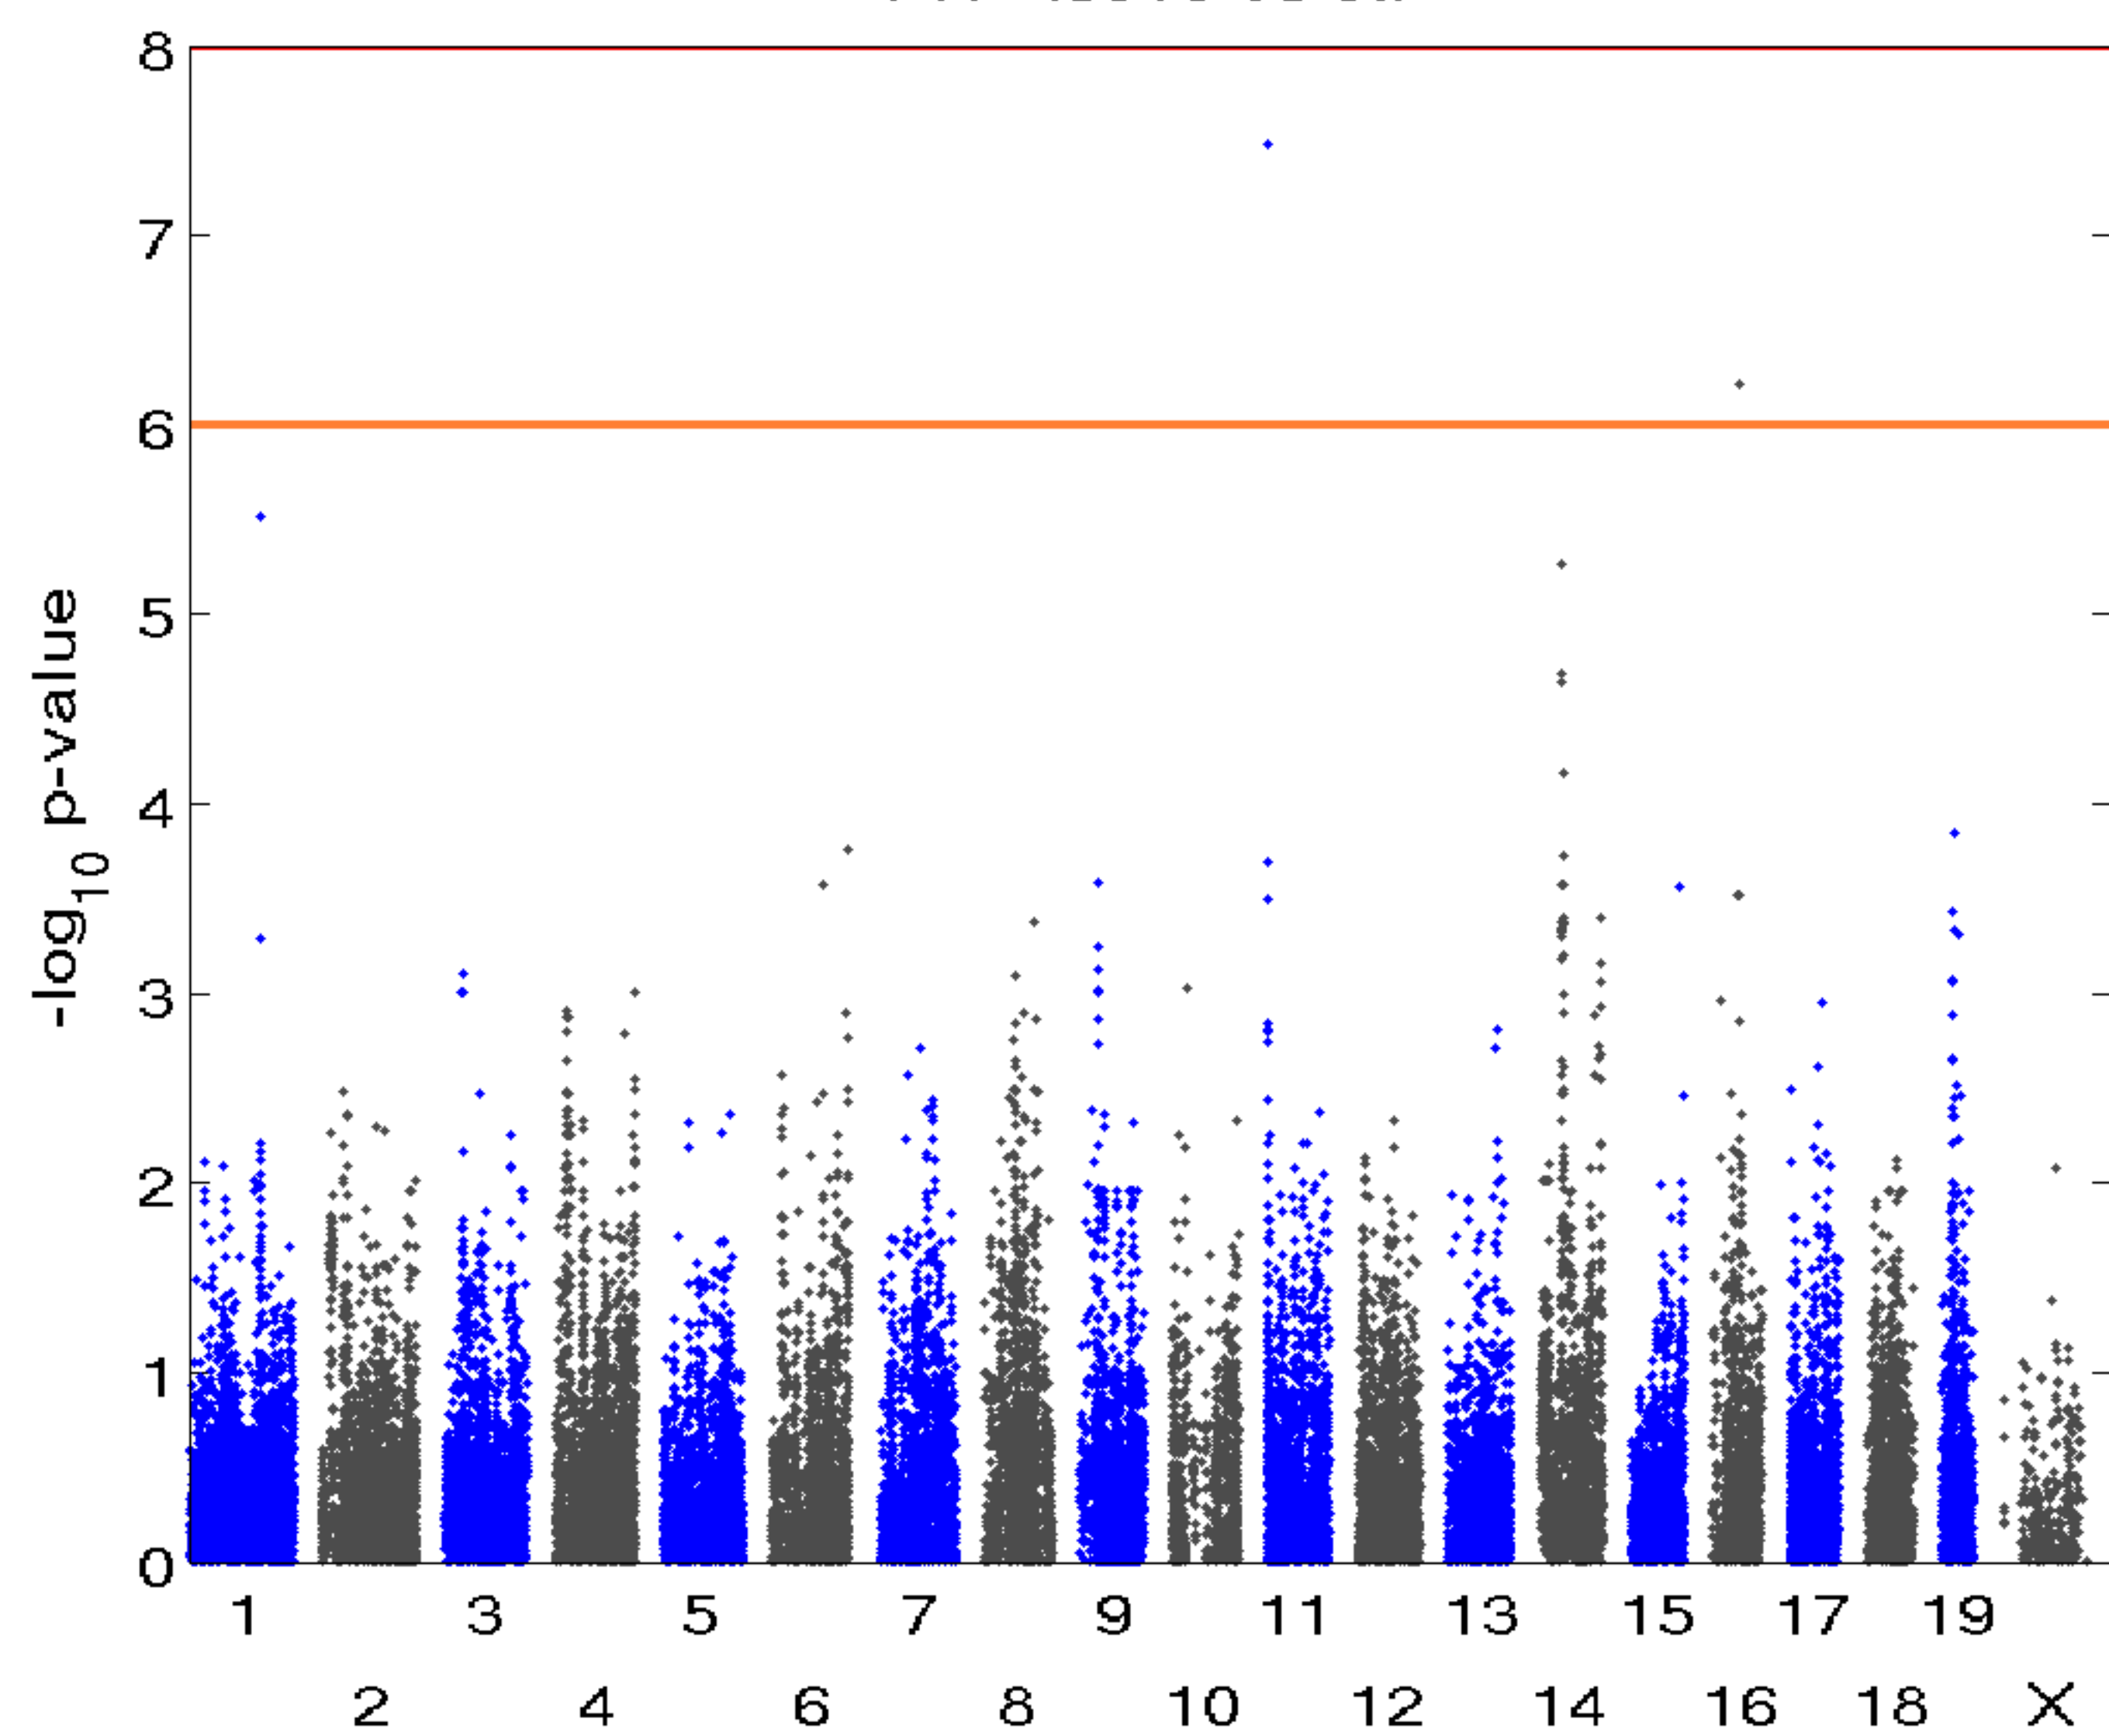

PR - iso10 vs ctr

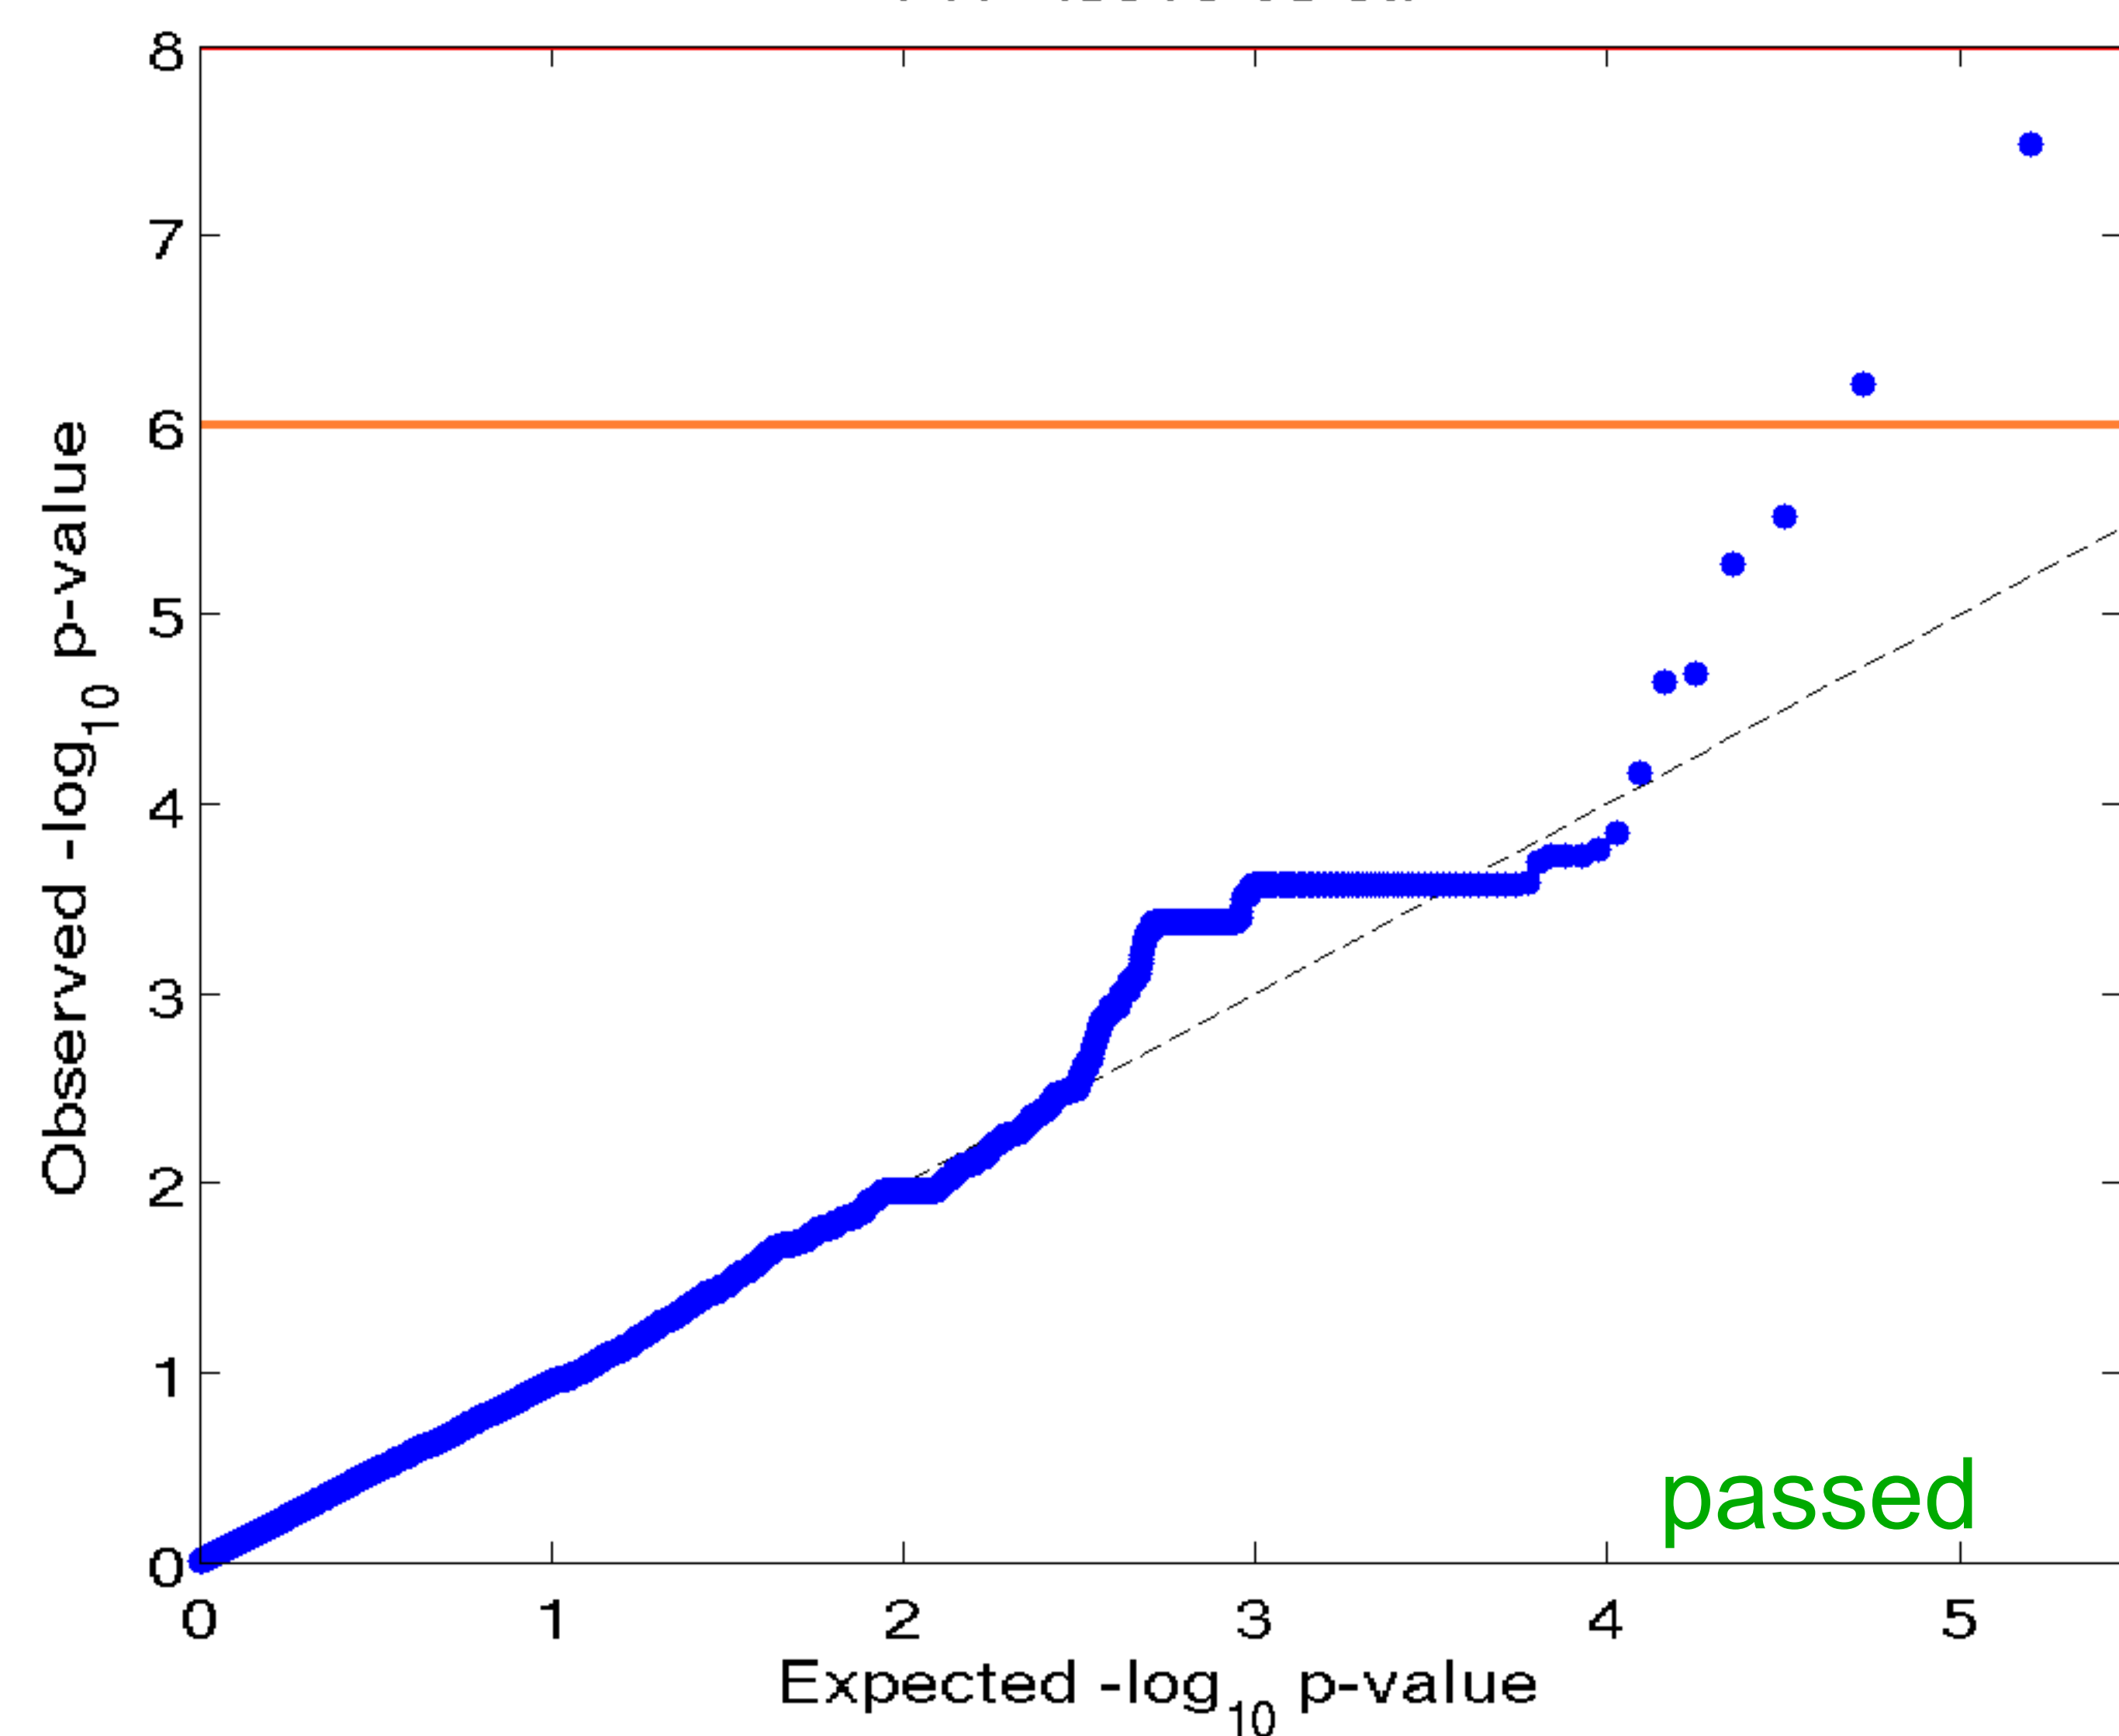

Qamp - iso10 vs ctr

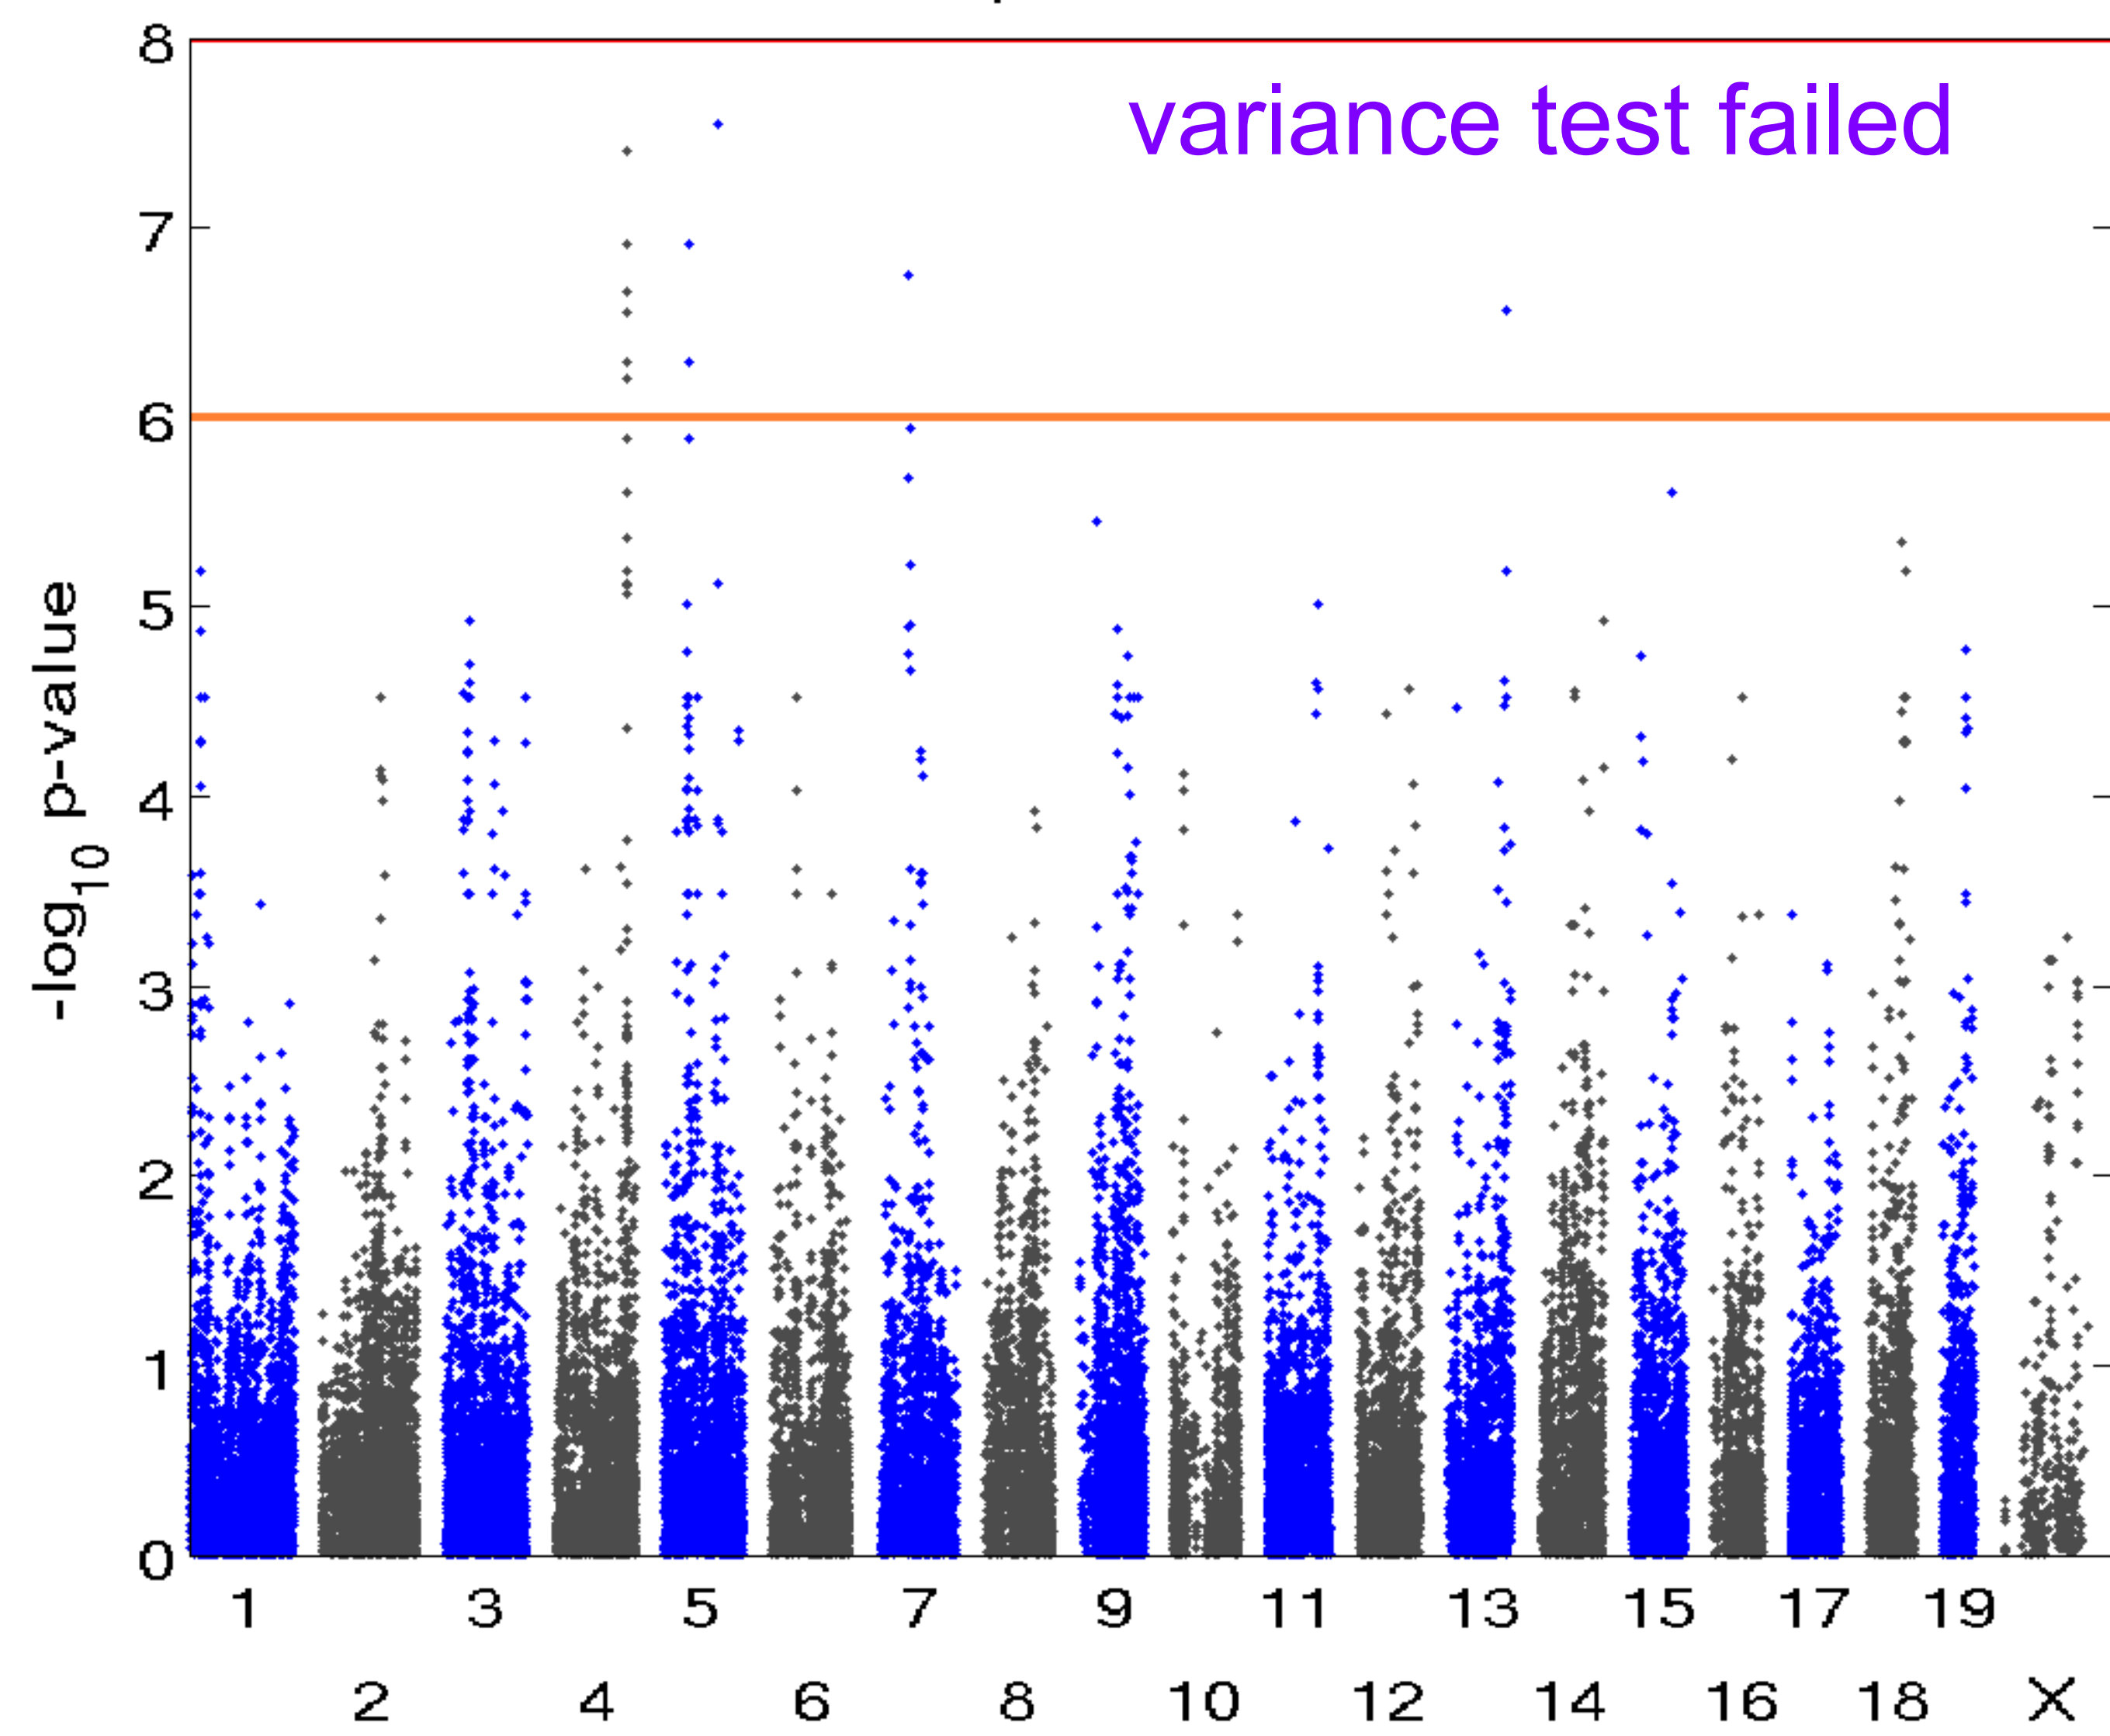

Qamp - iso10 vs ctr

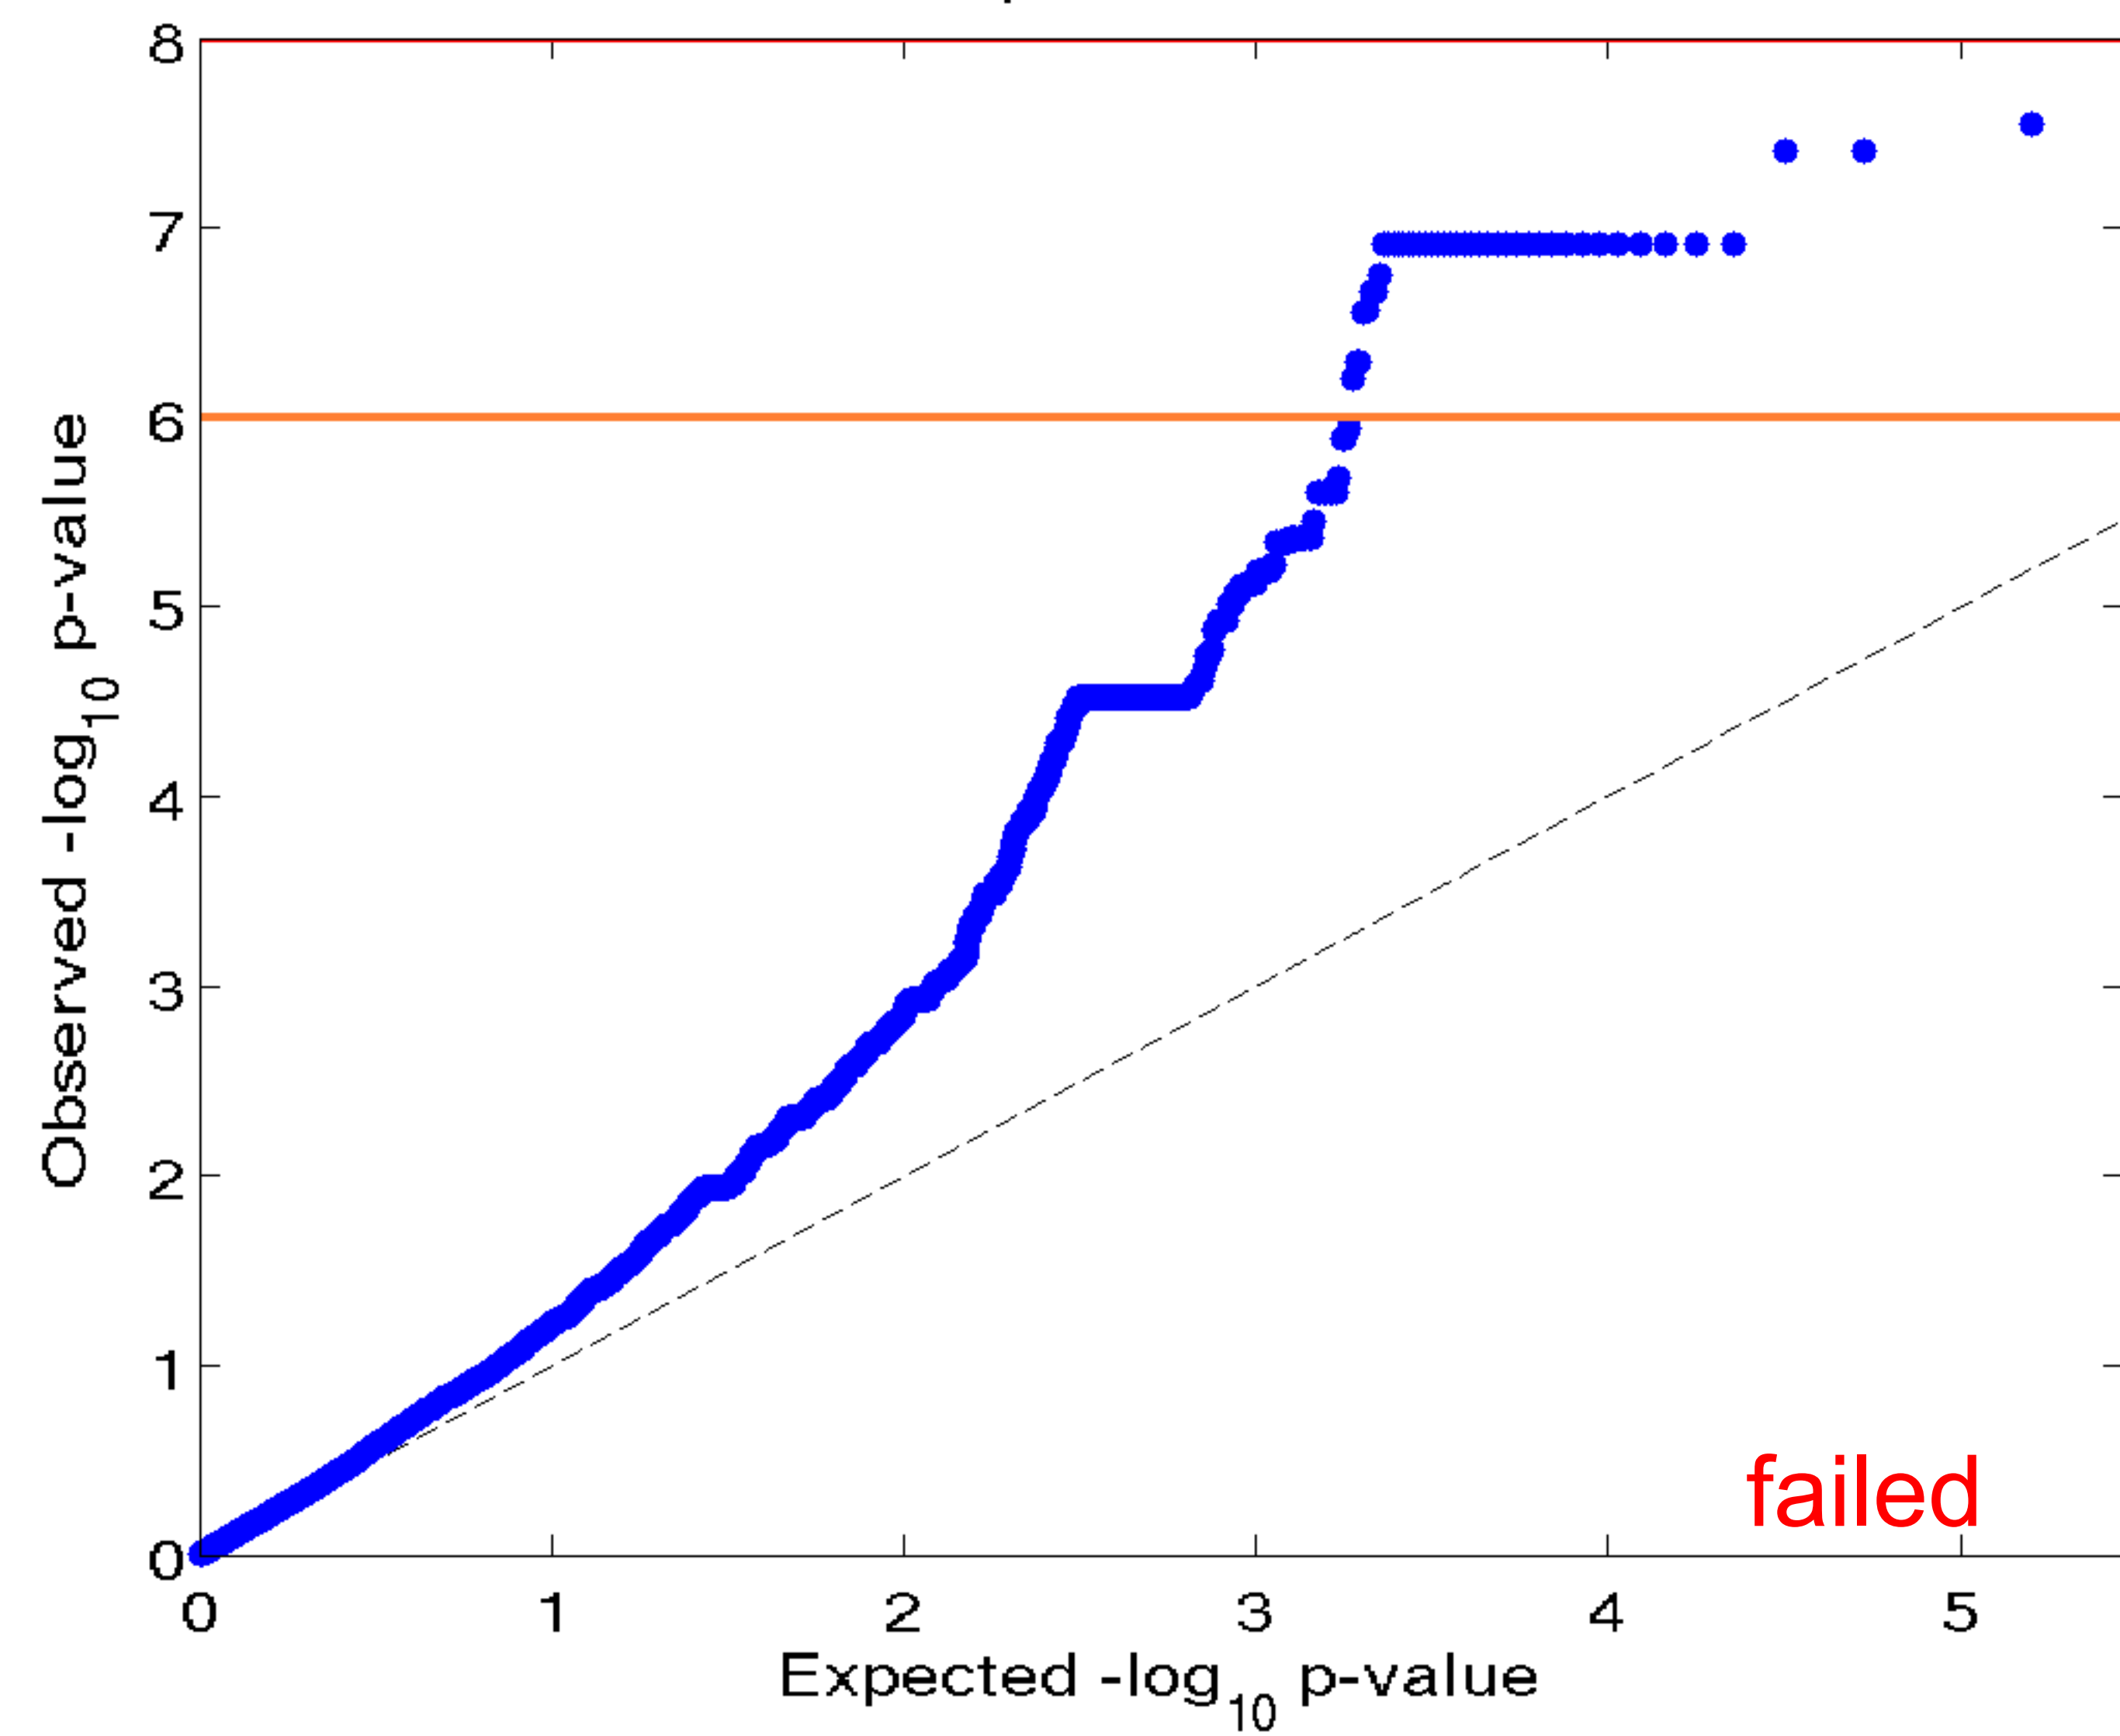



QRSarea - iso10 vs ctr

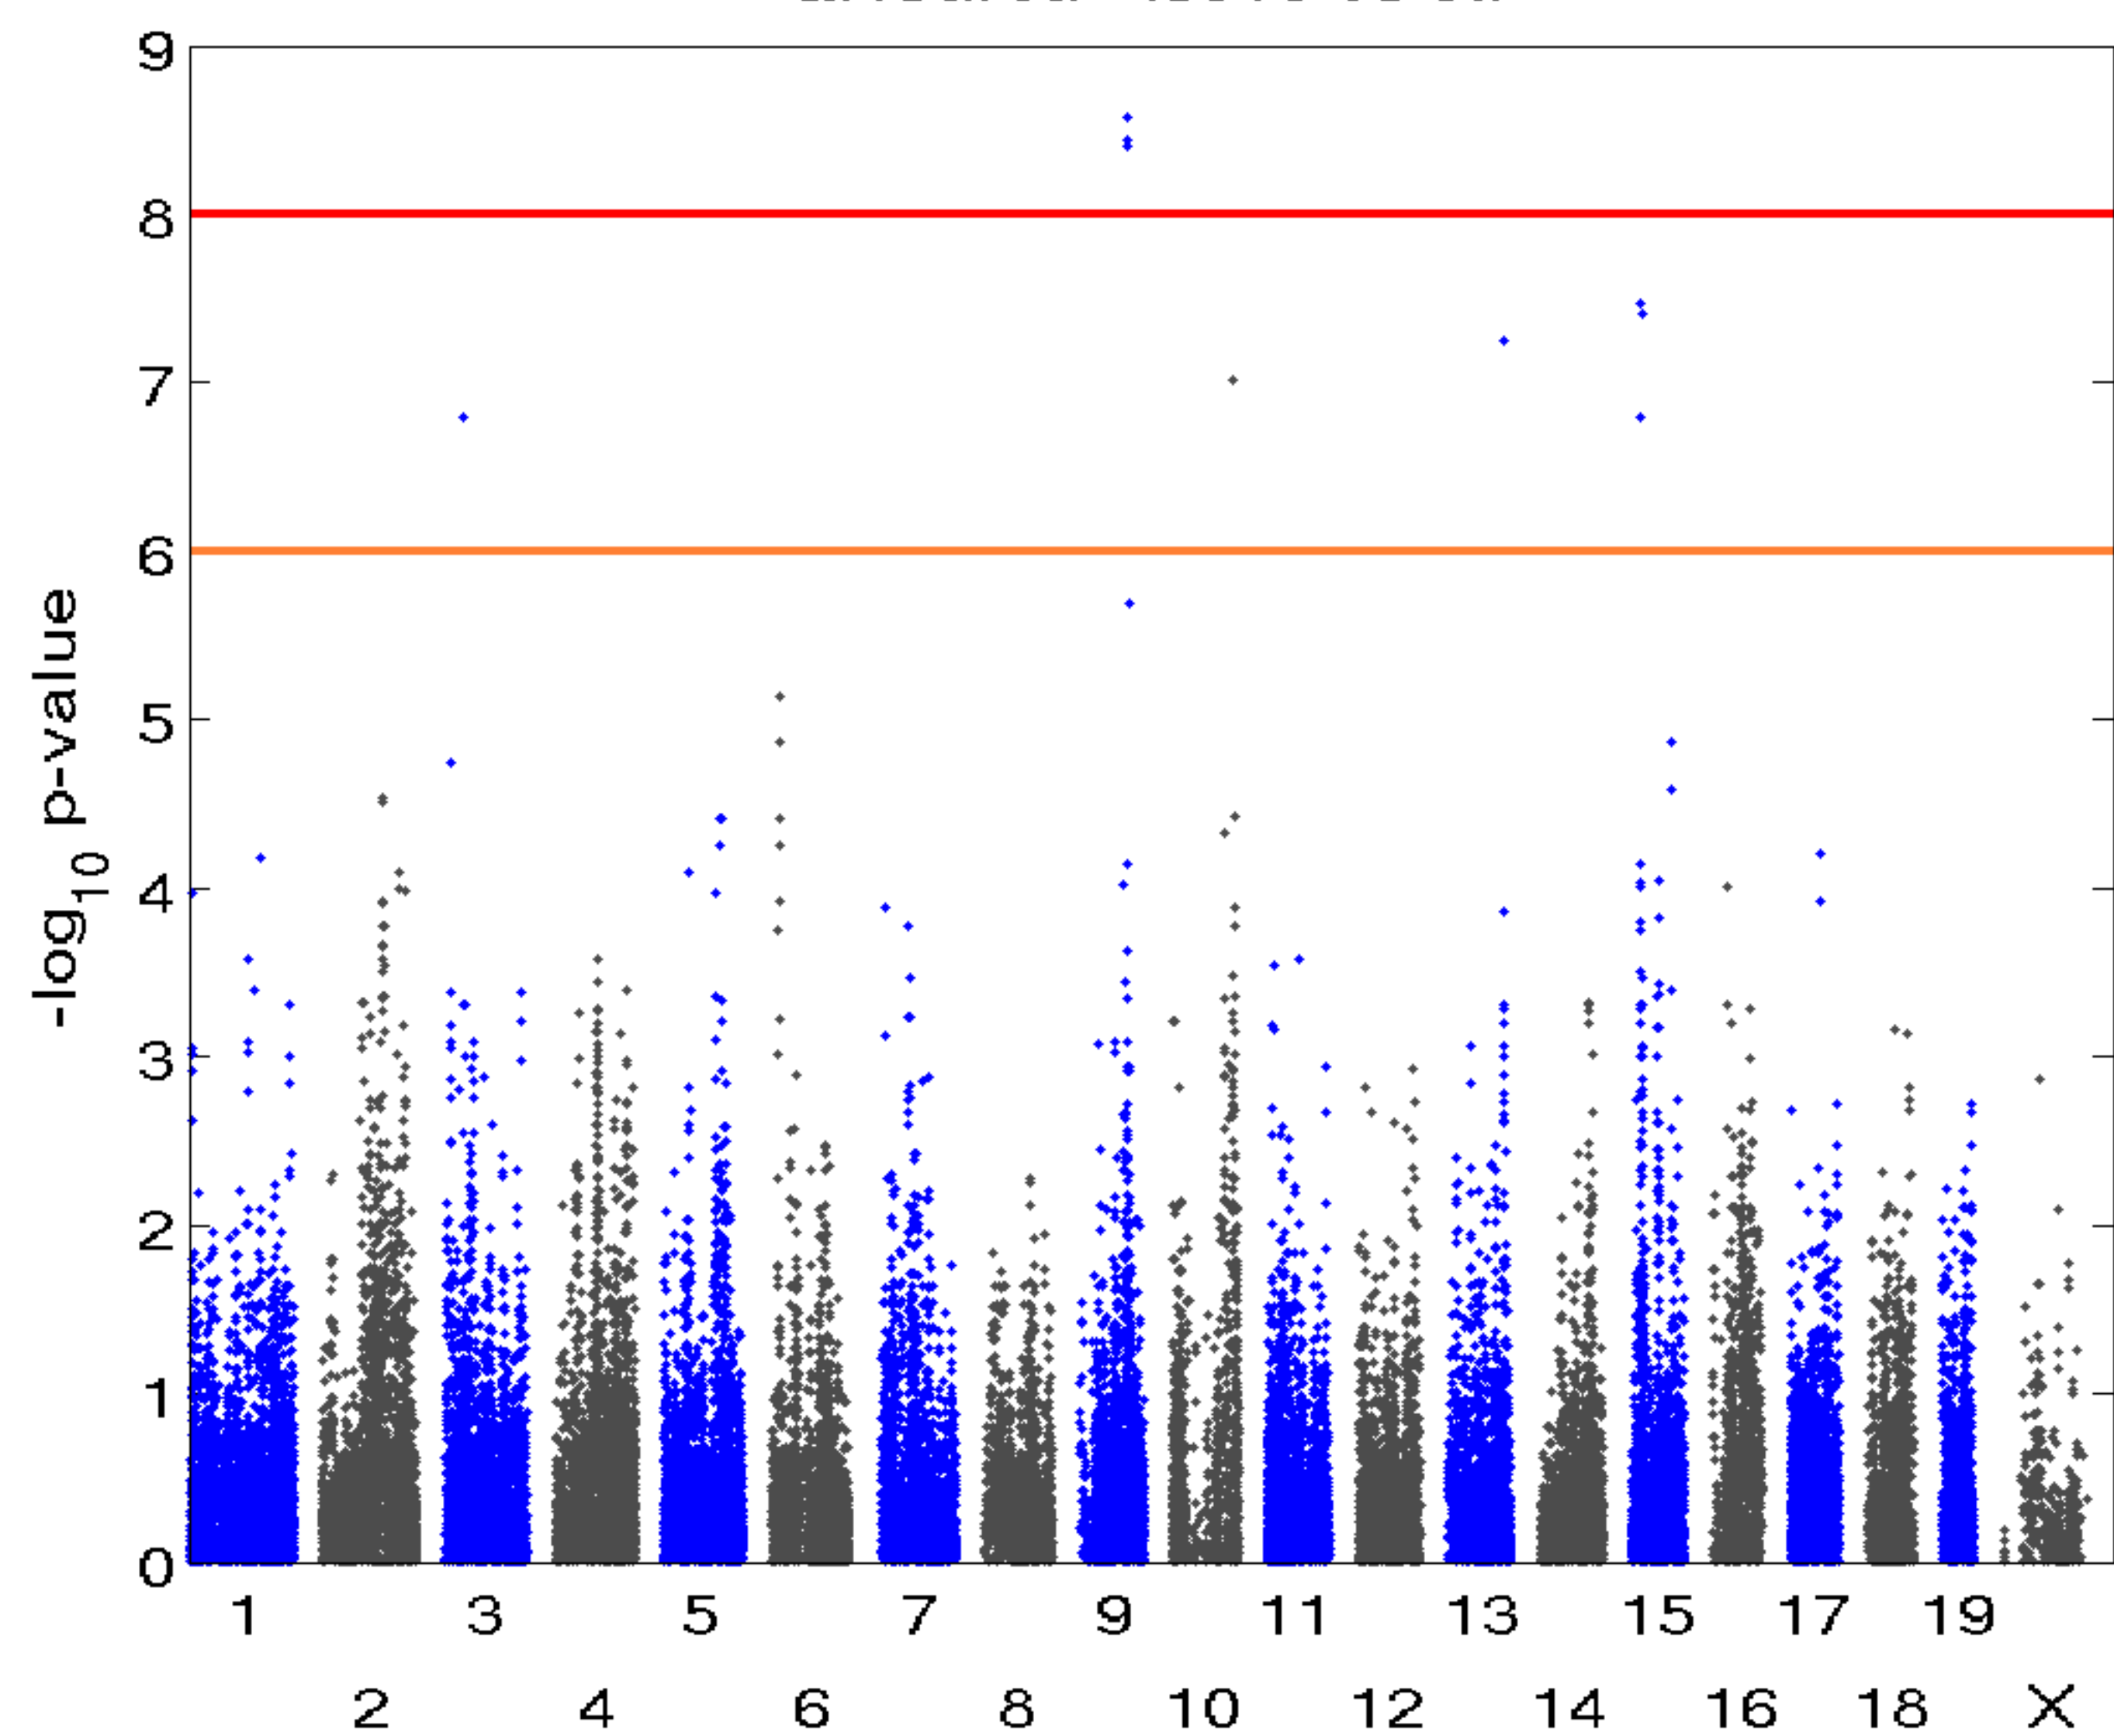

QRSarea - iso10 vs ctr

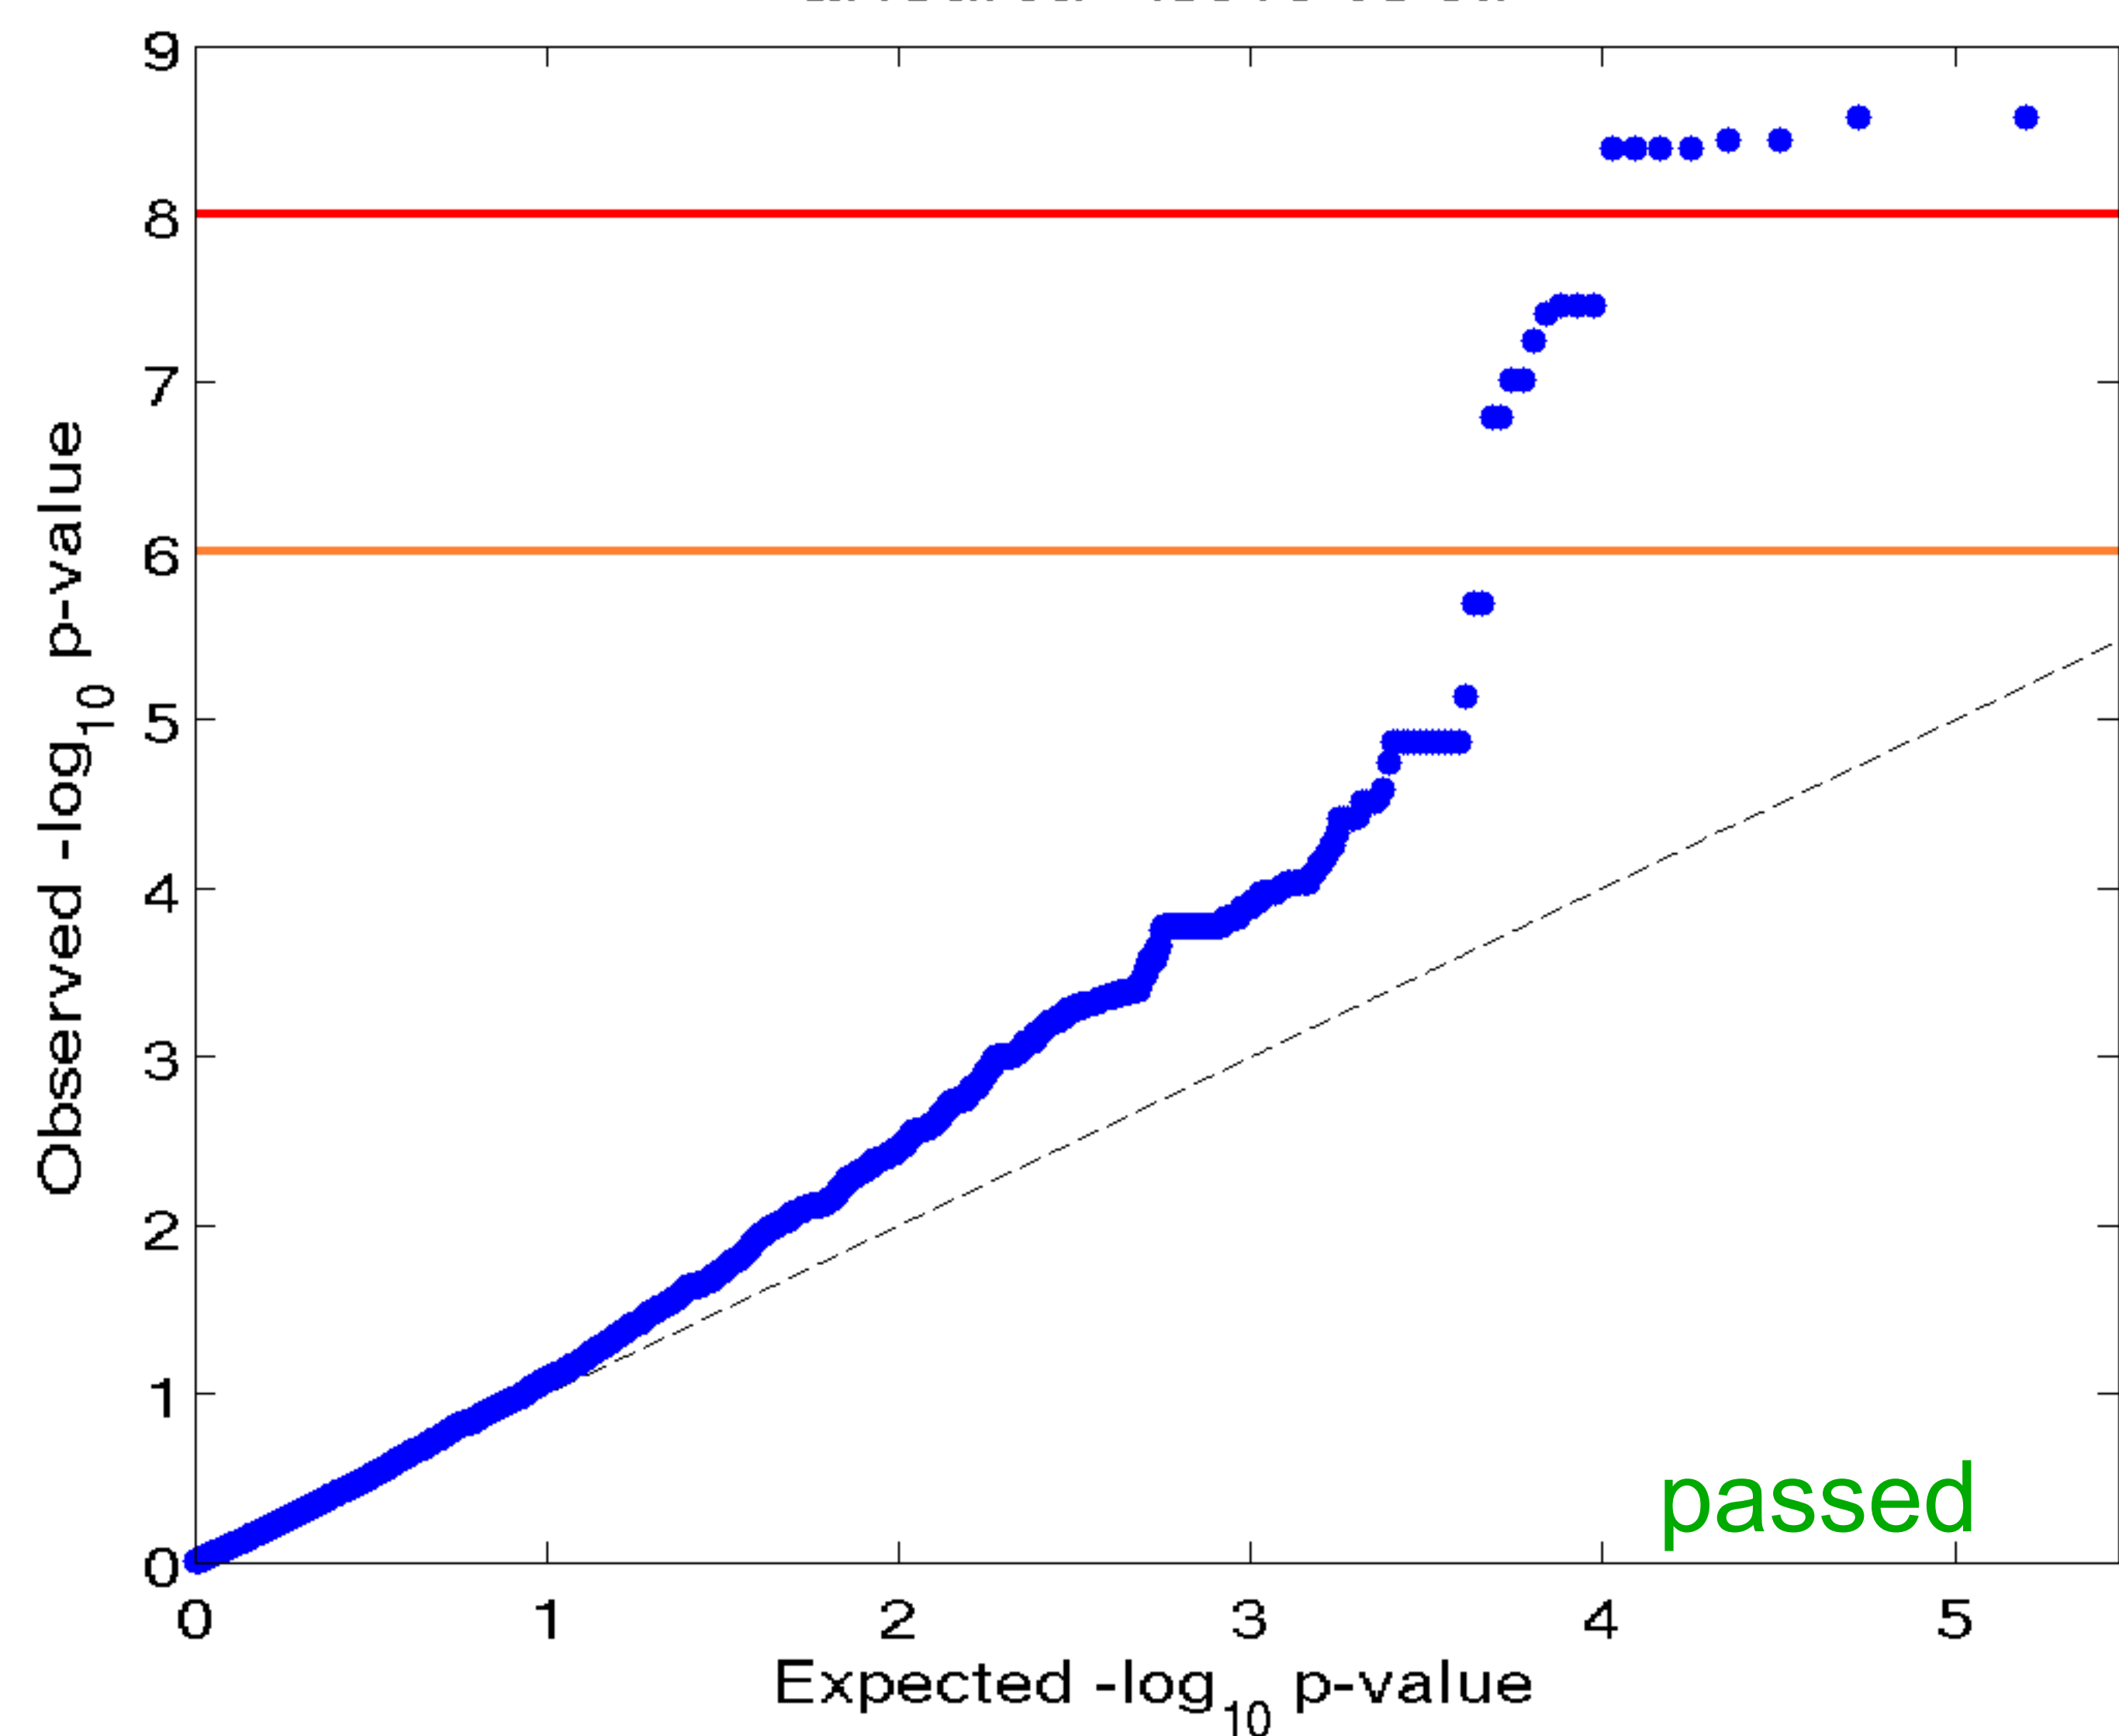

QRS - iso10 vs ctr

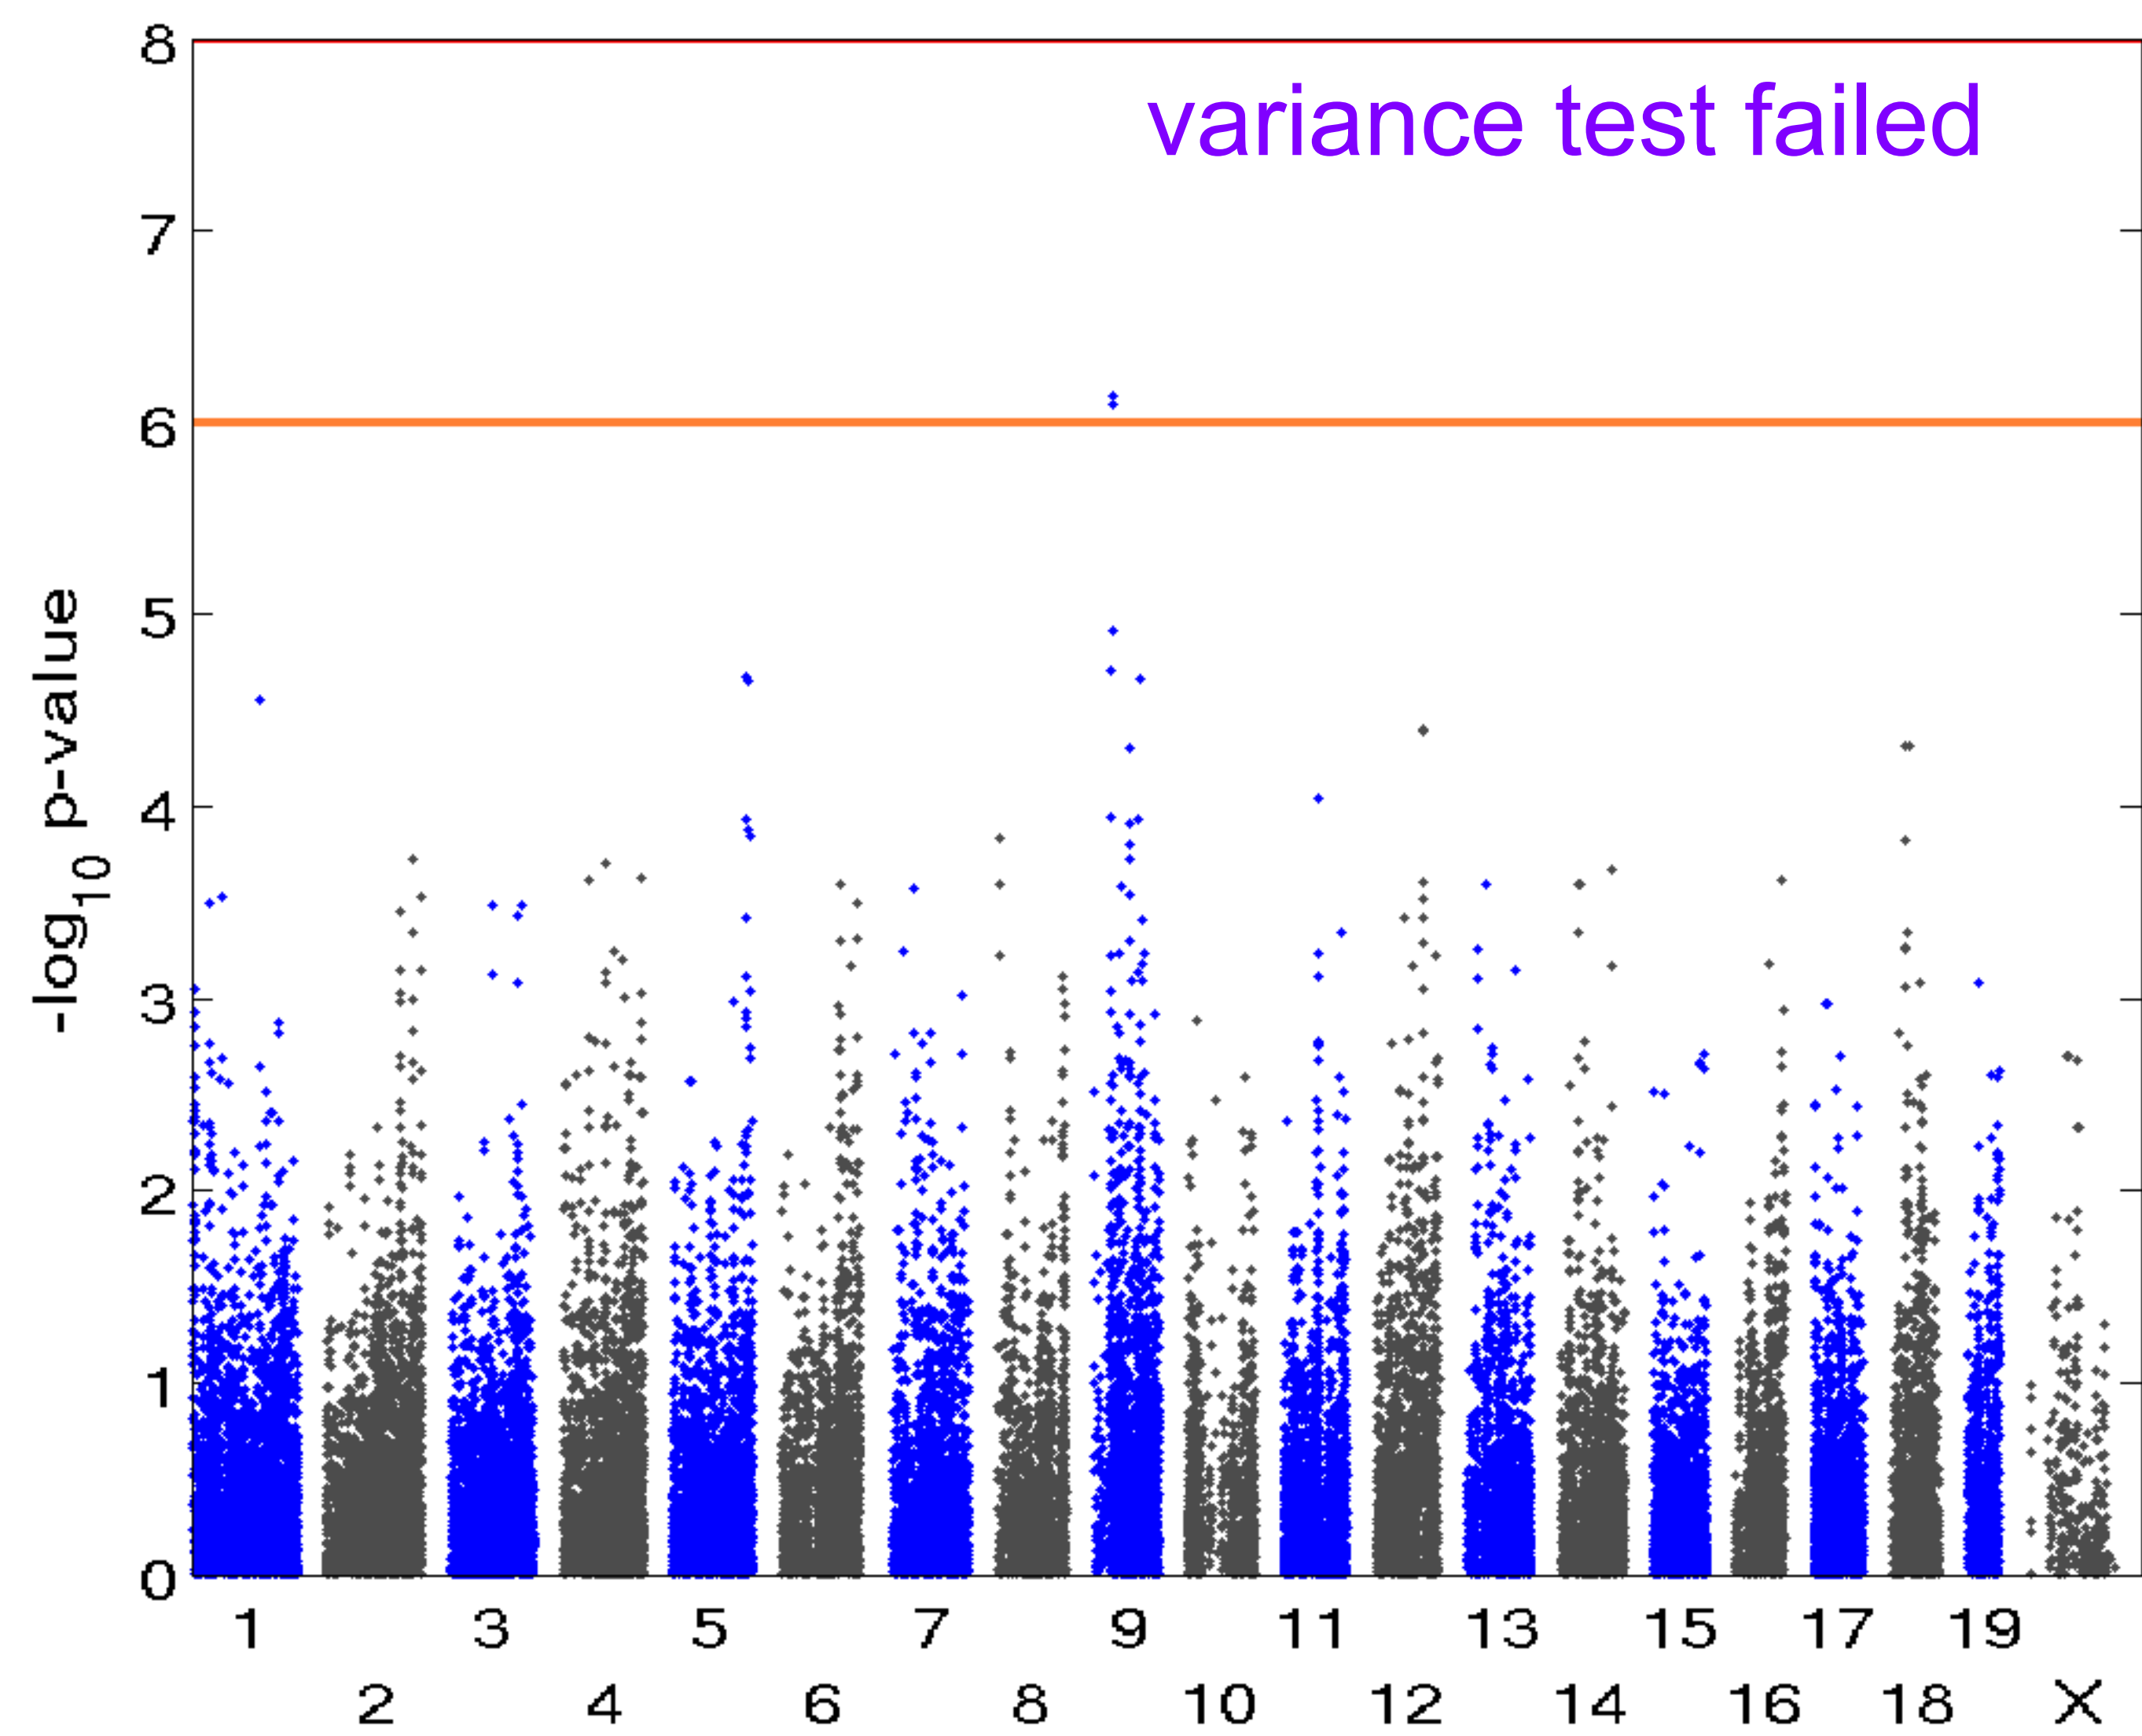

QRS - iso10 vs ctr

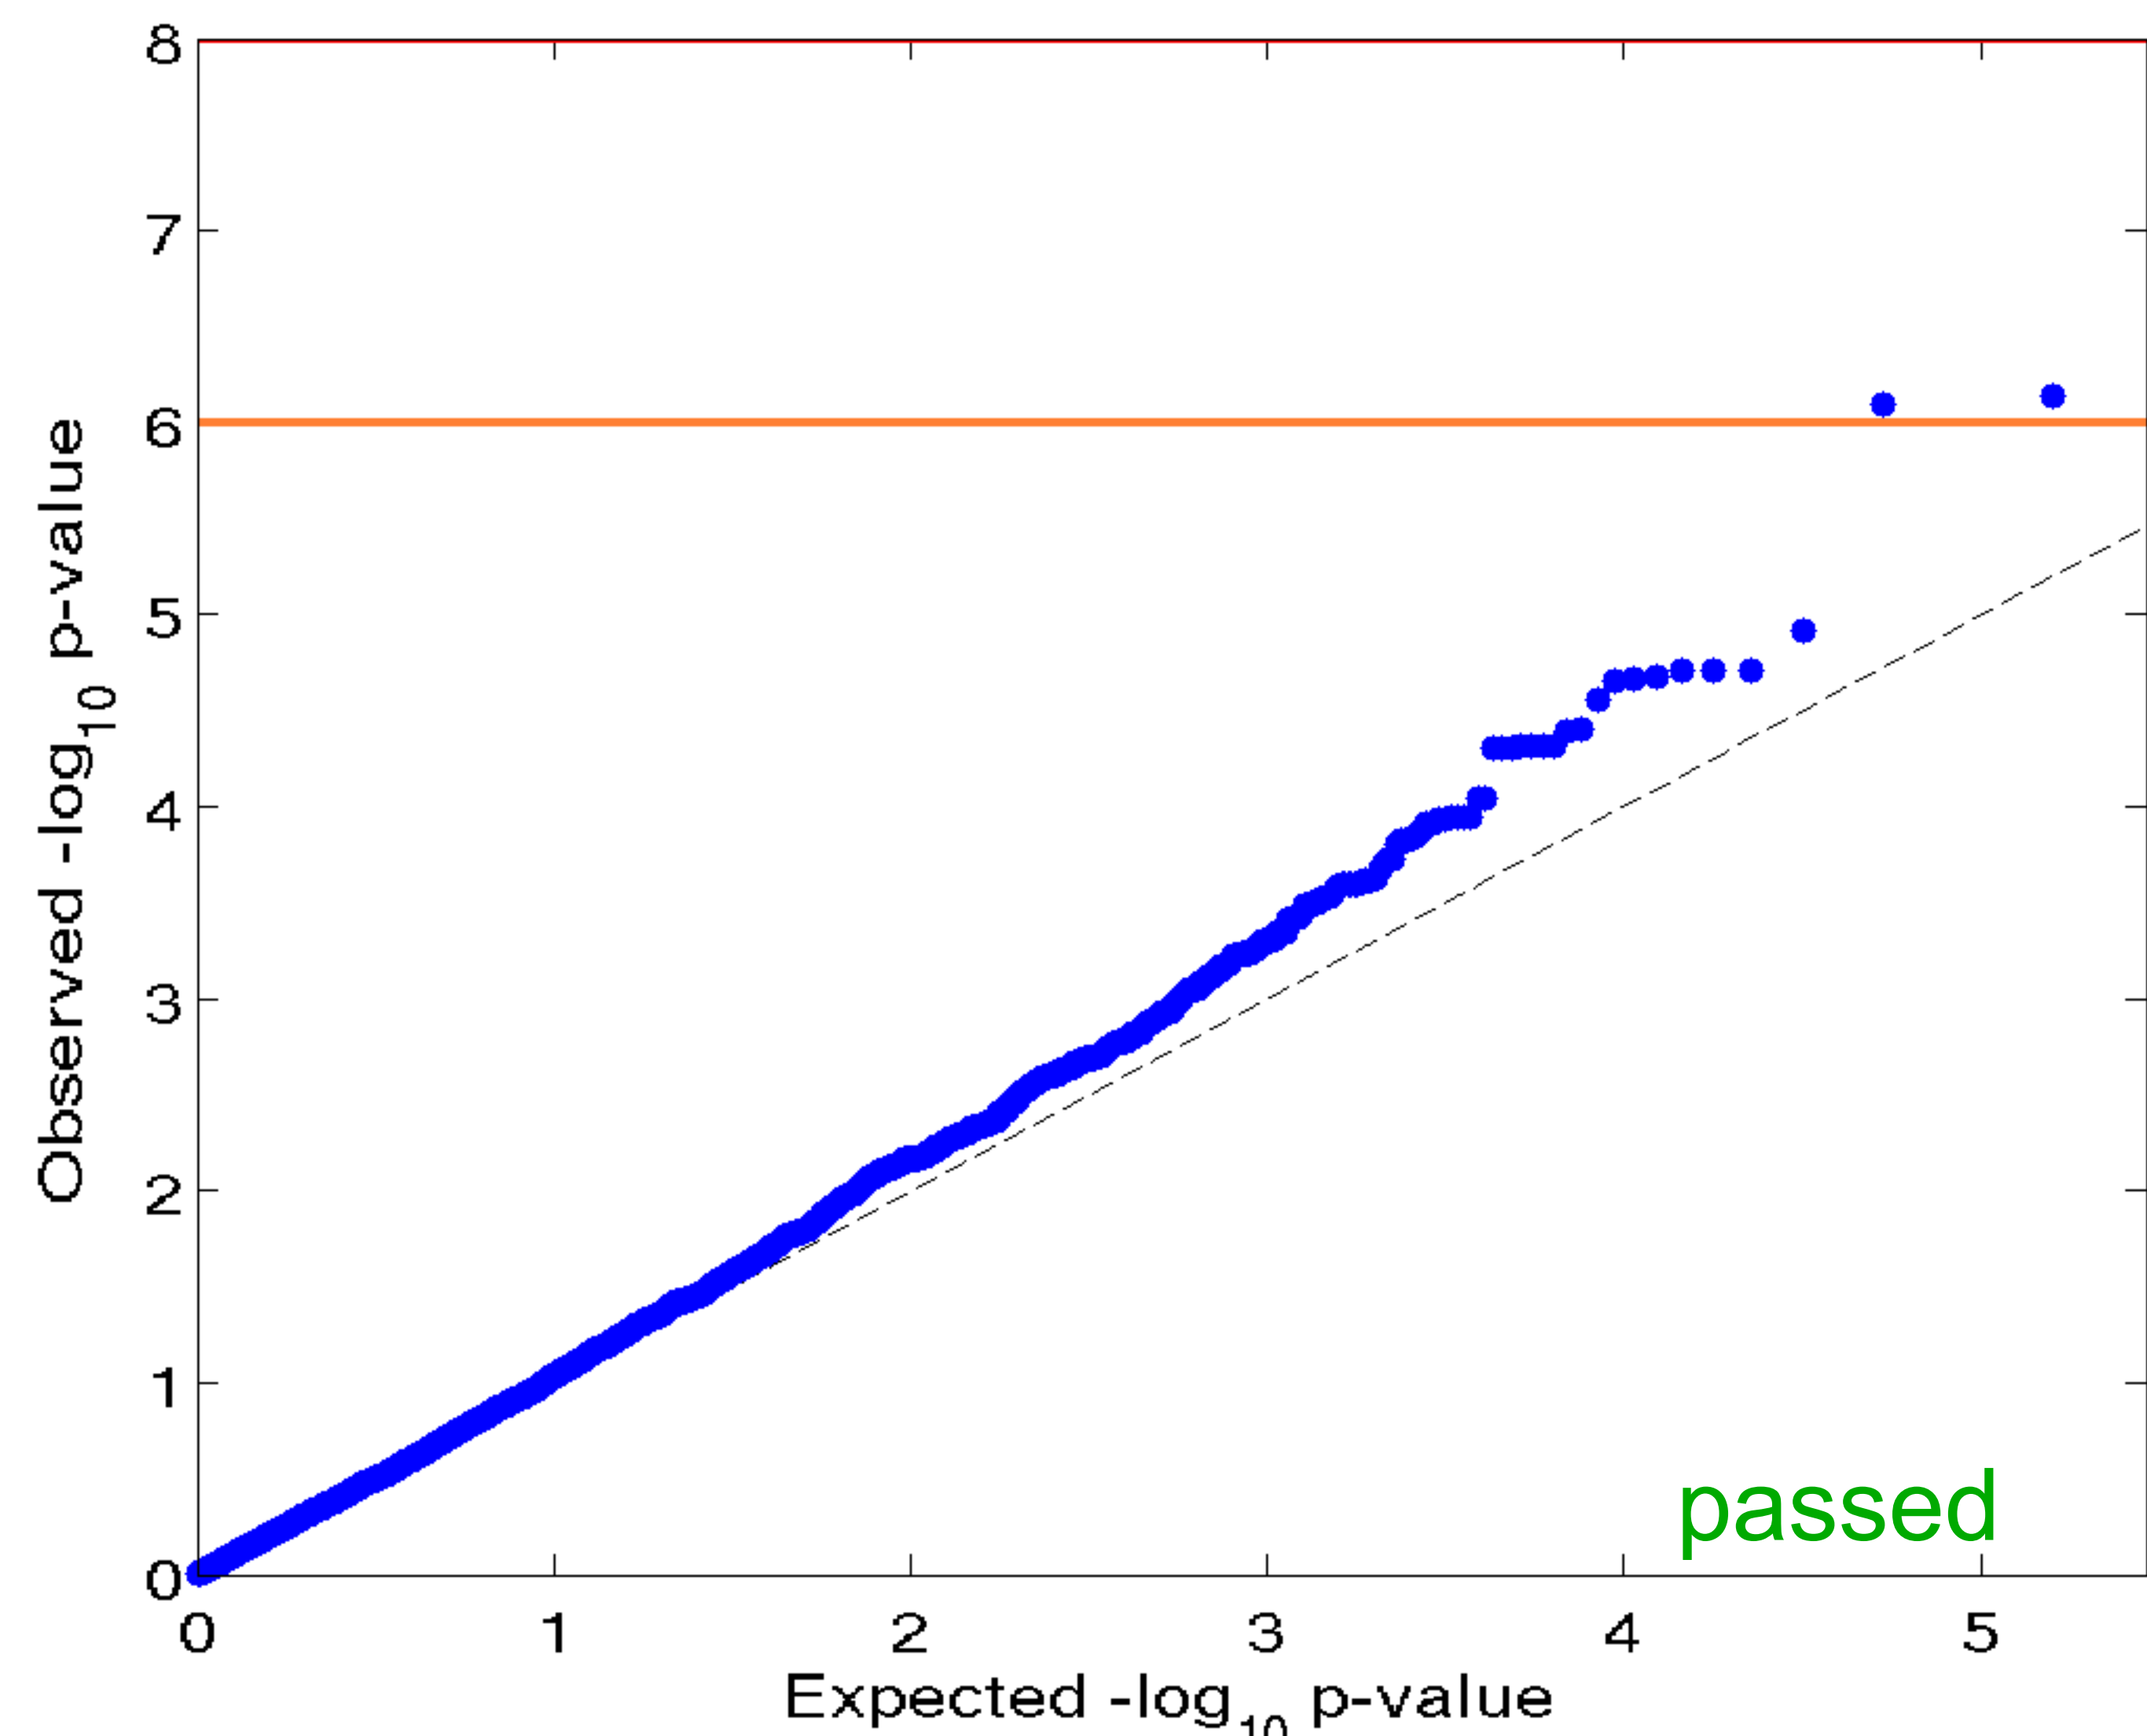

QTc - iso10 vs ctr

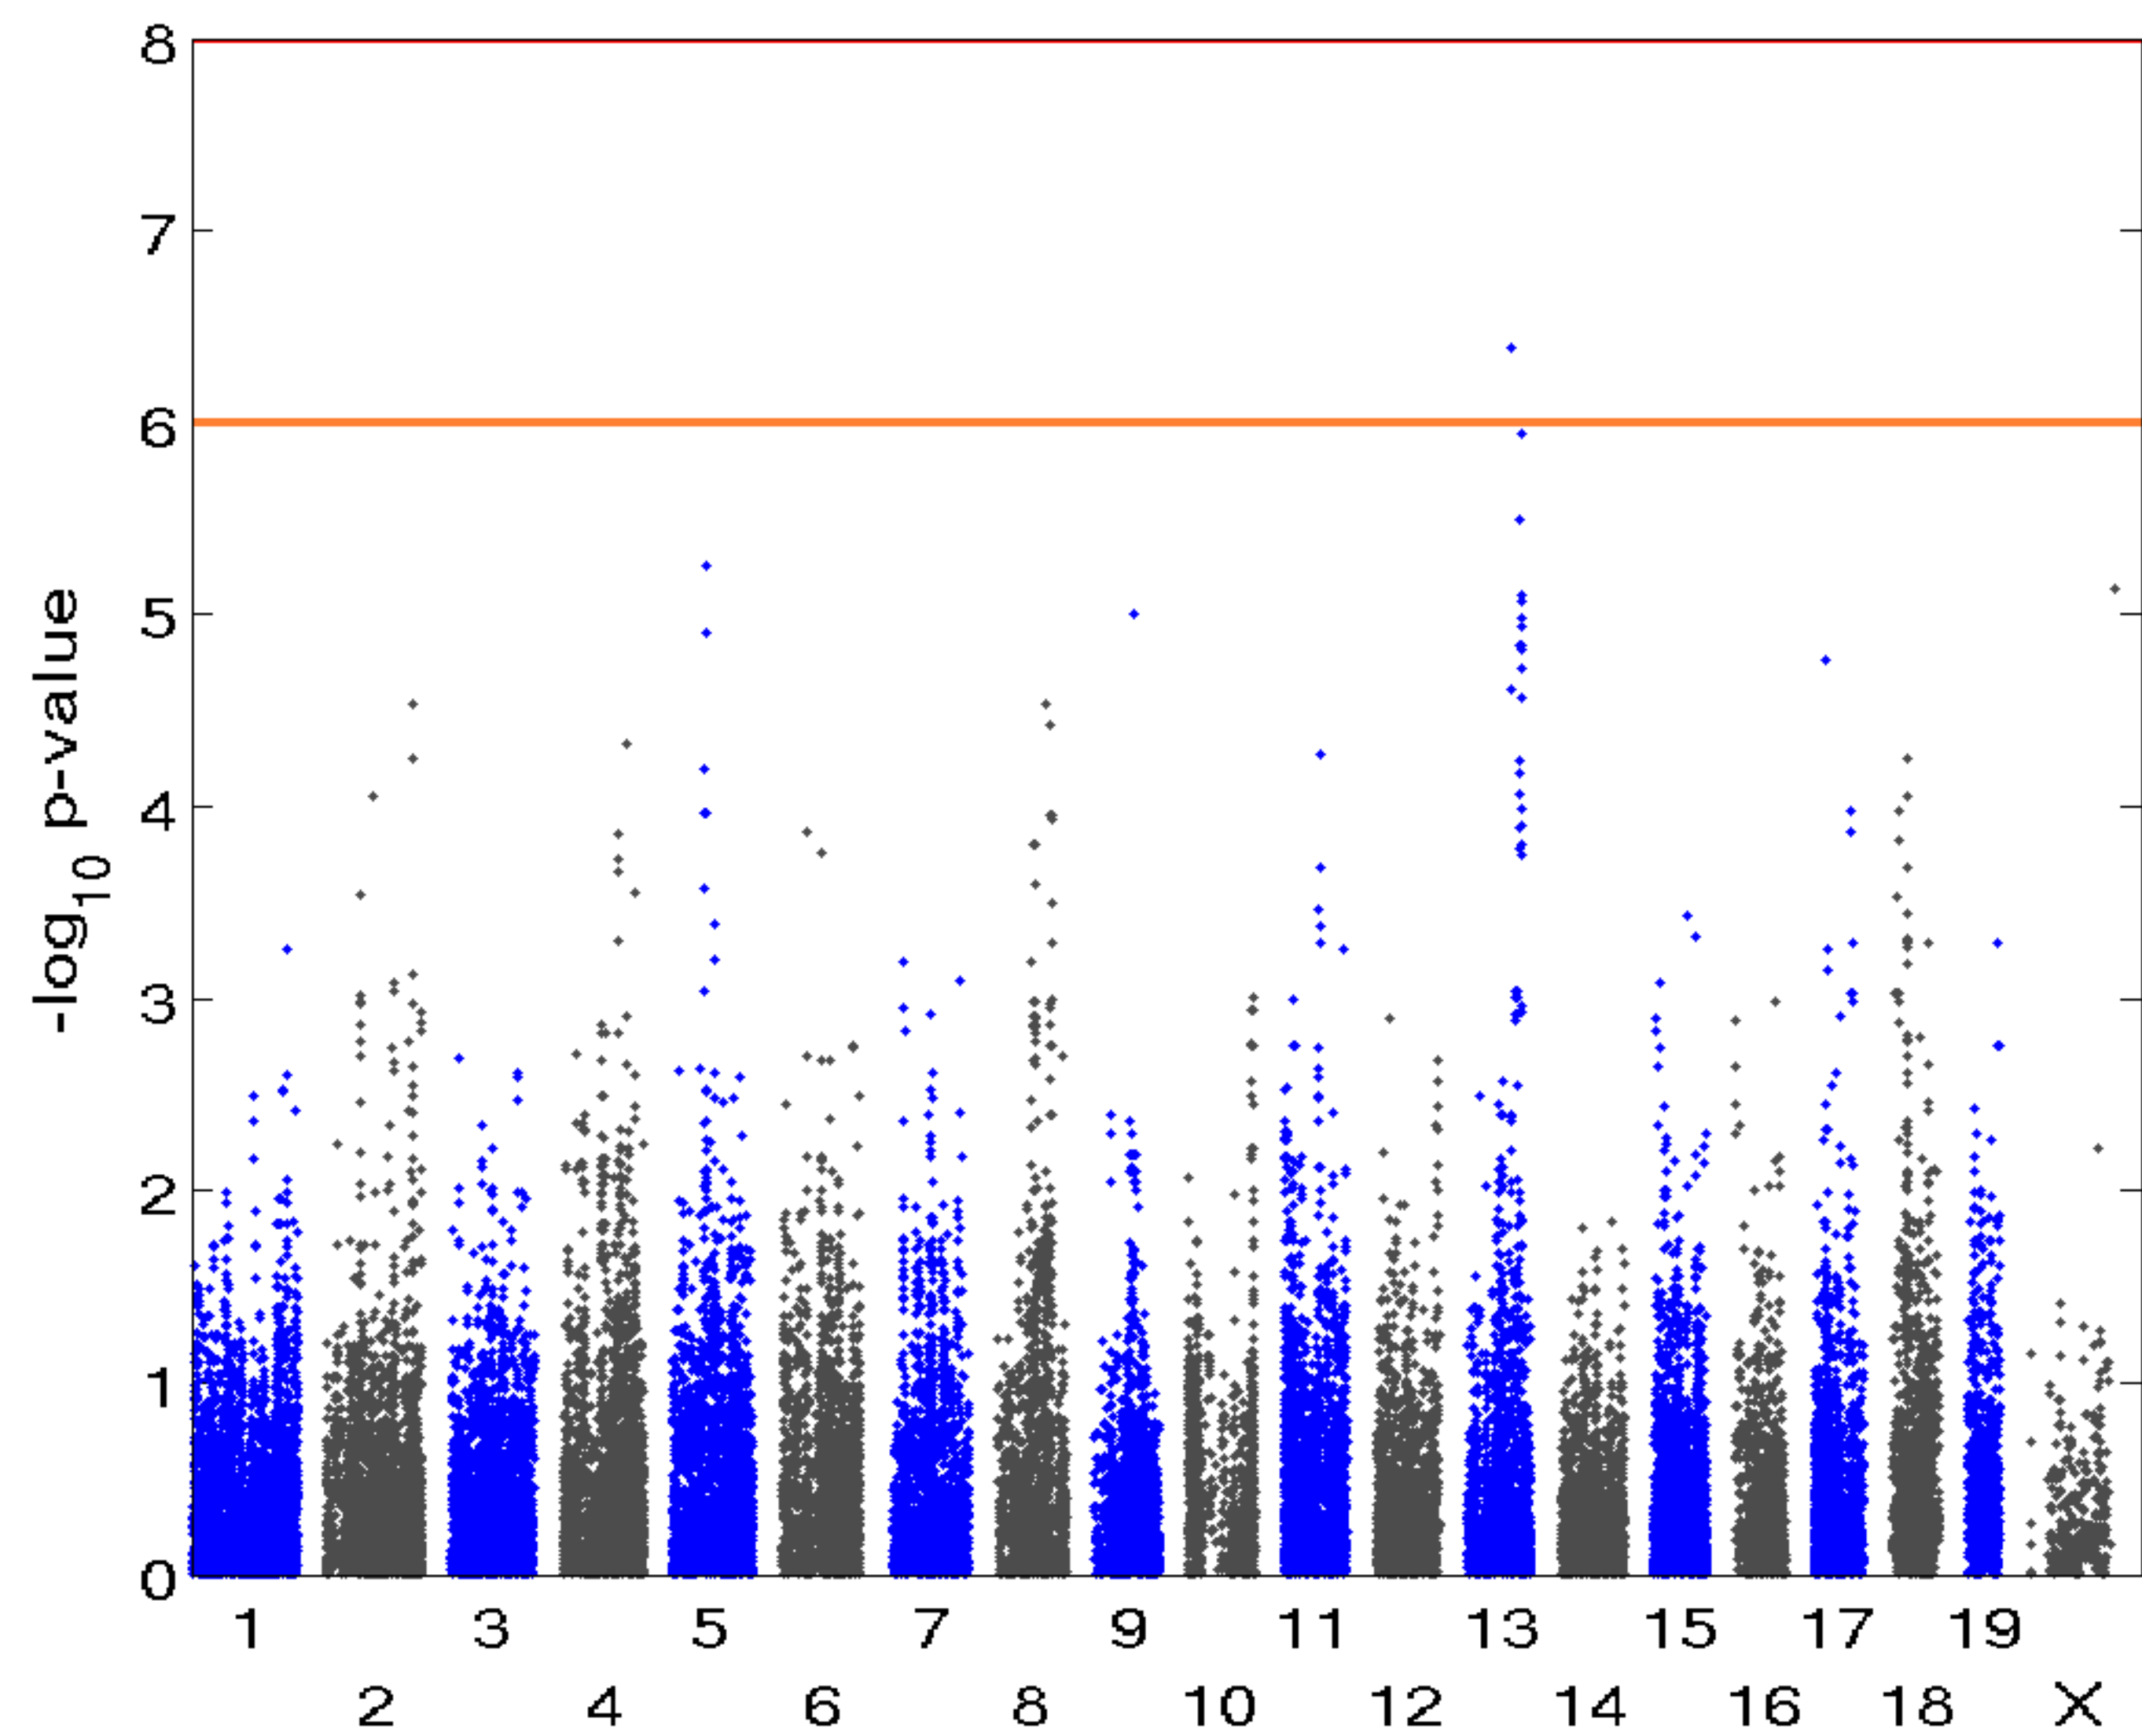

QTc - iso10 vs ctr

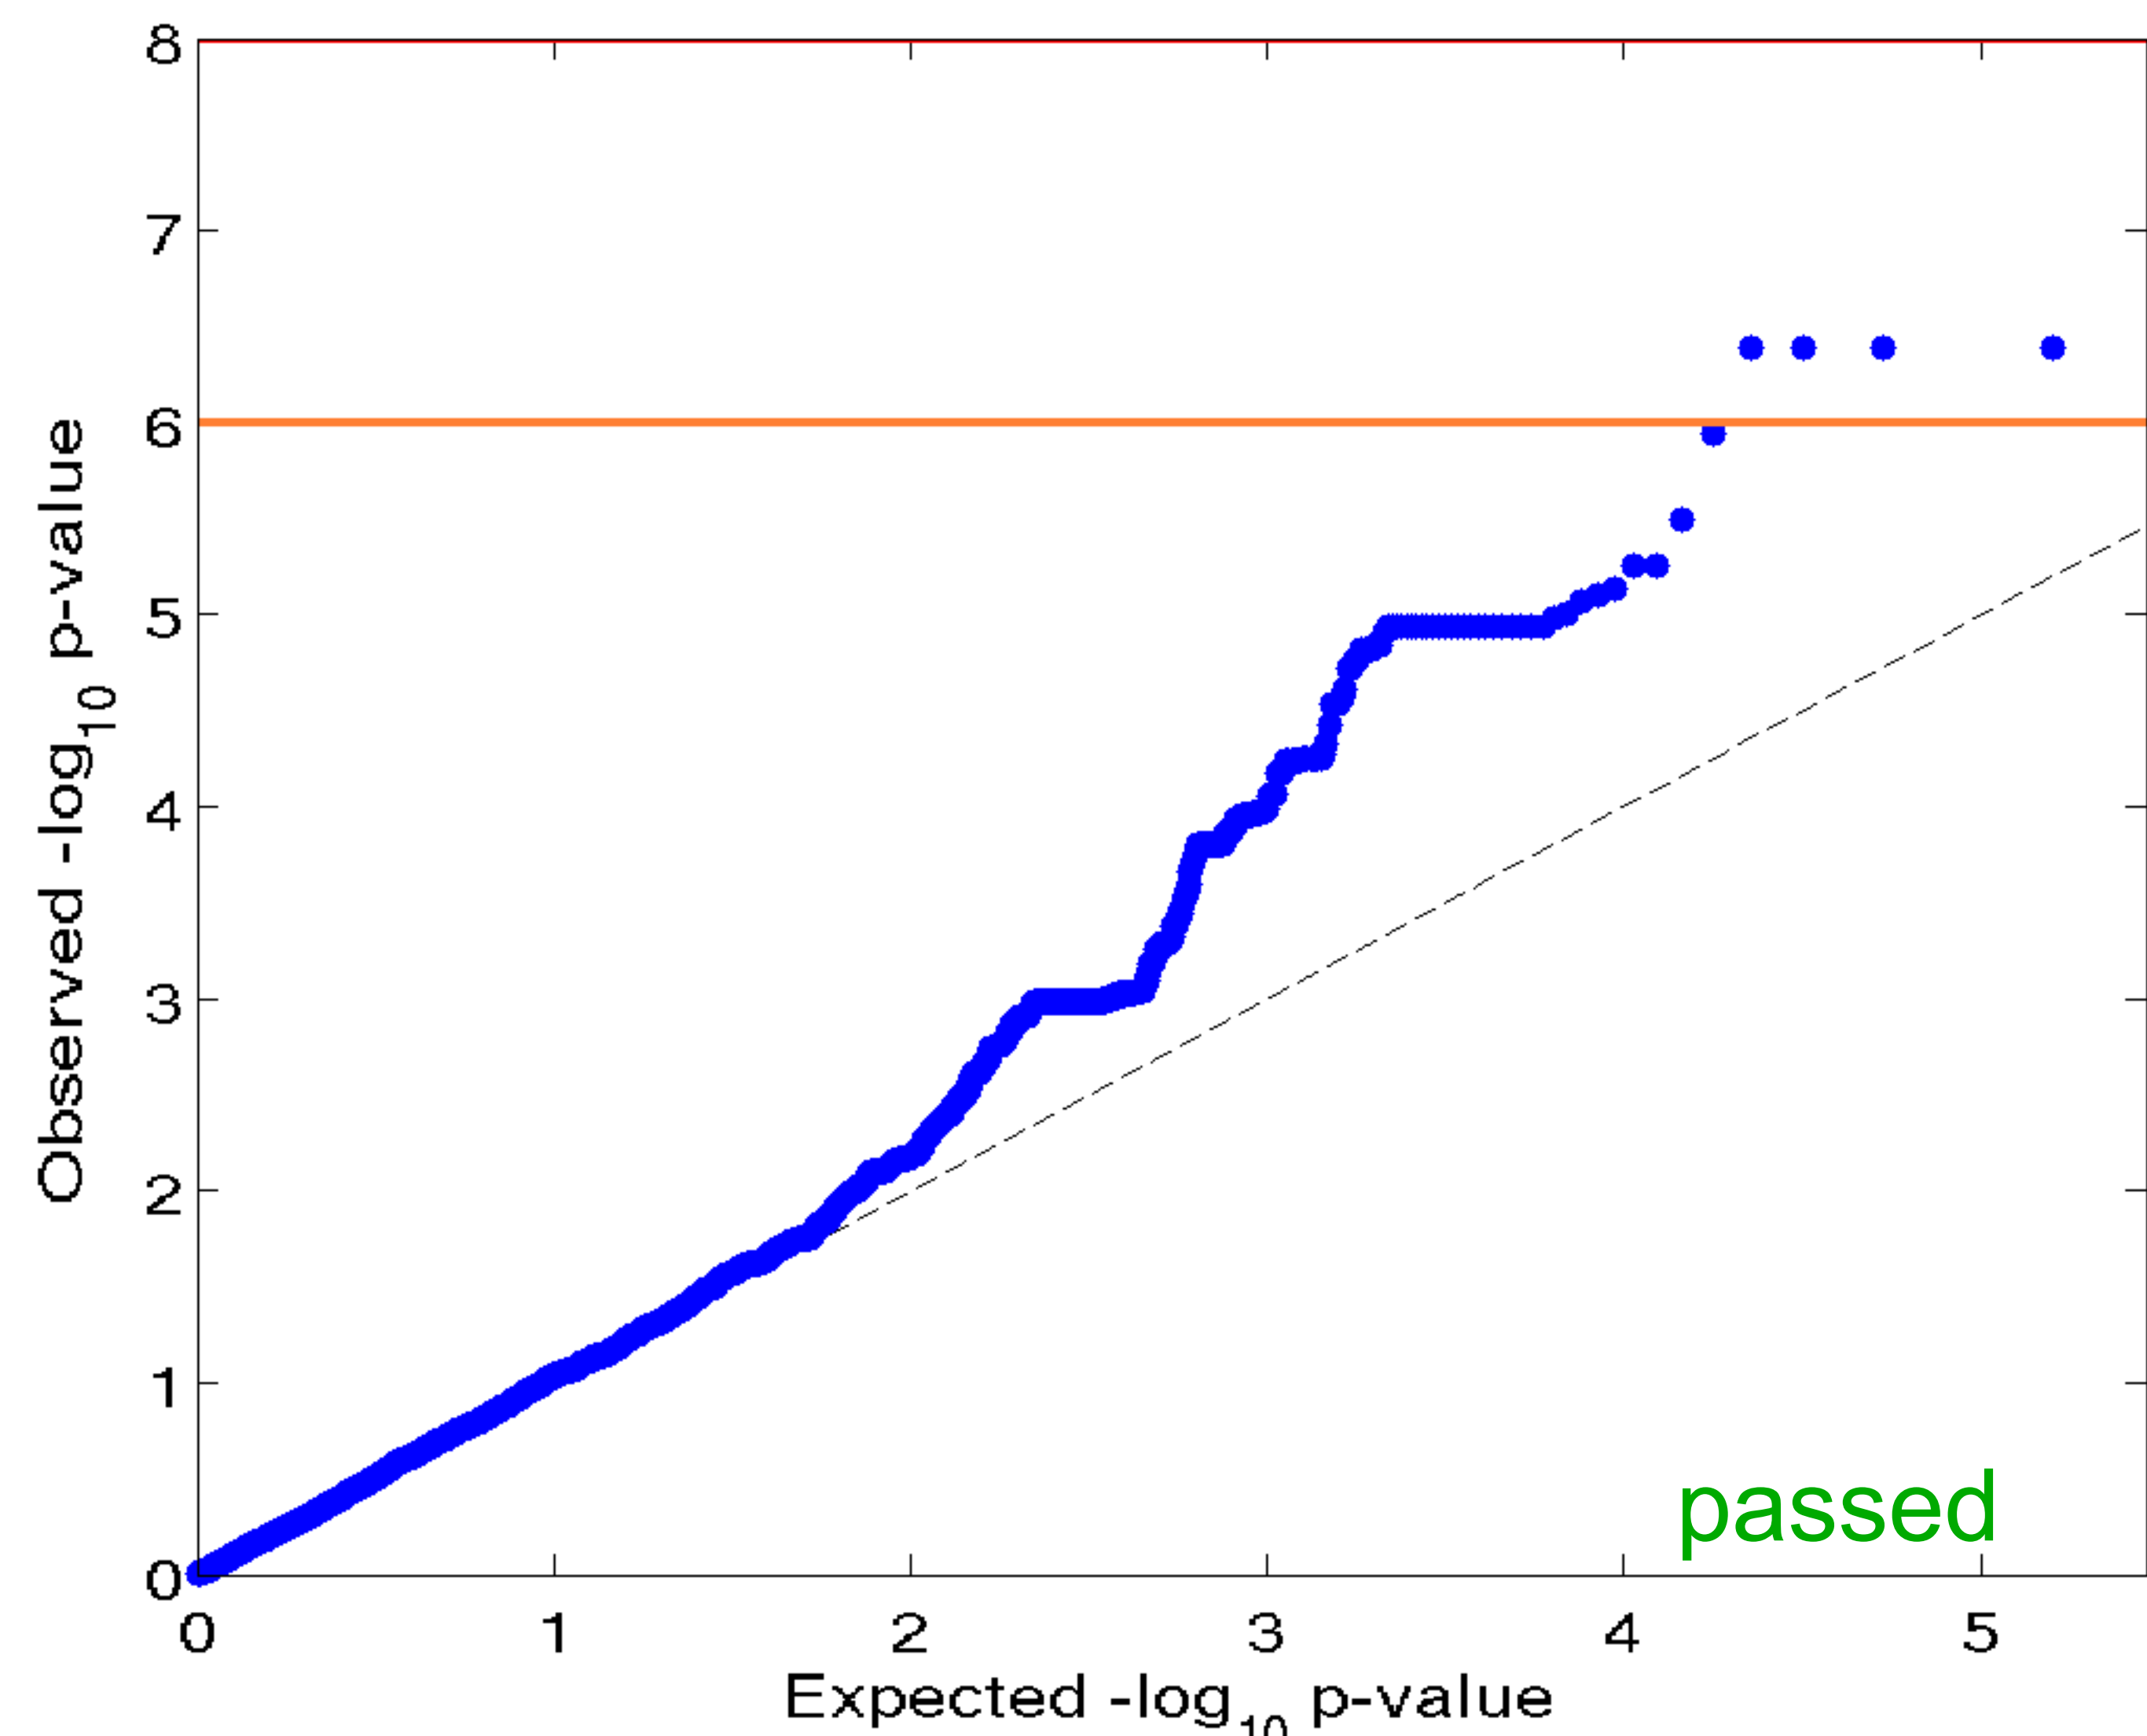

QT - iso10 vs ctr

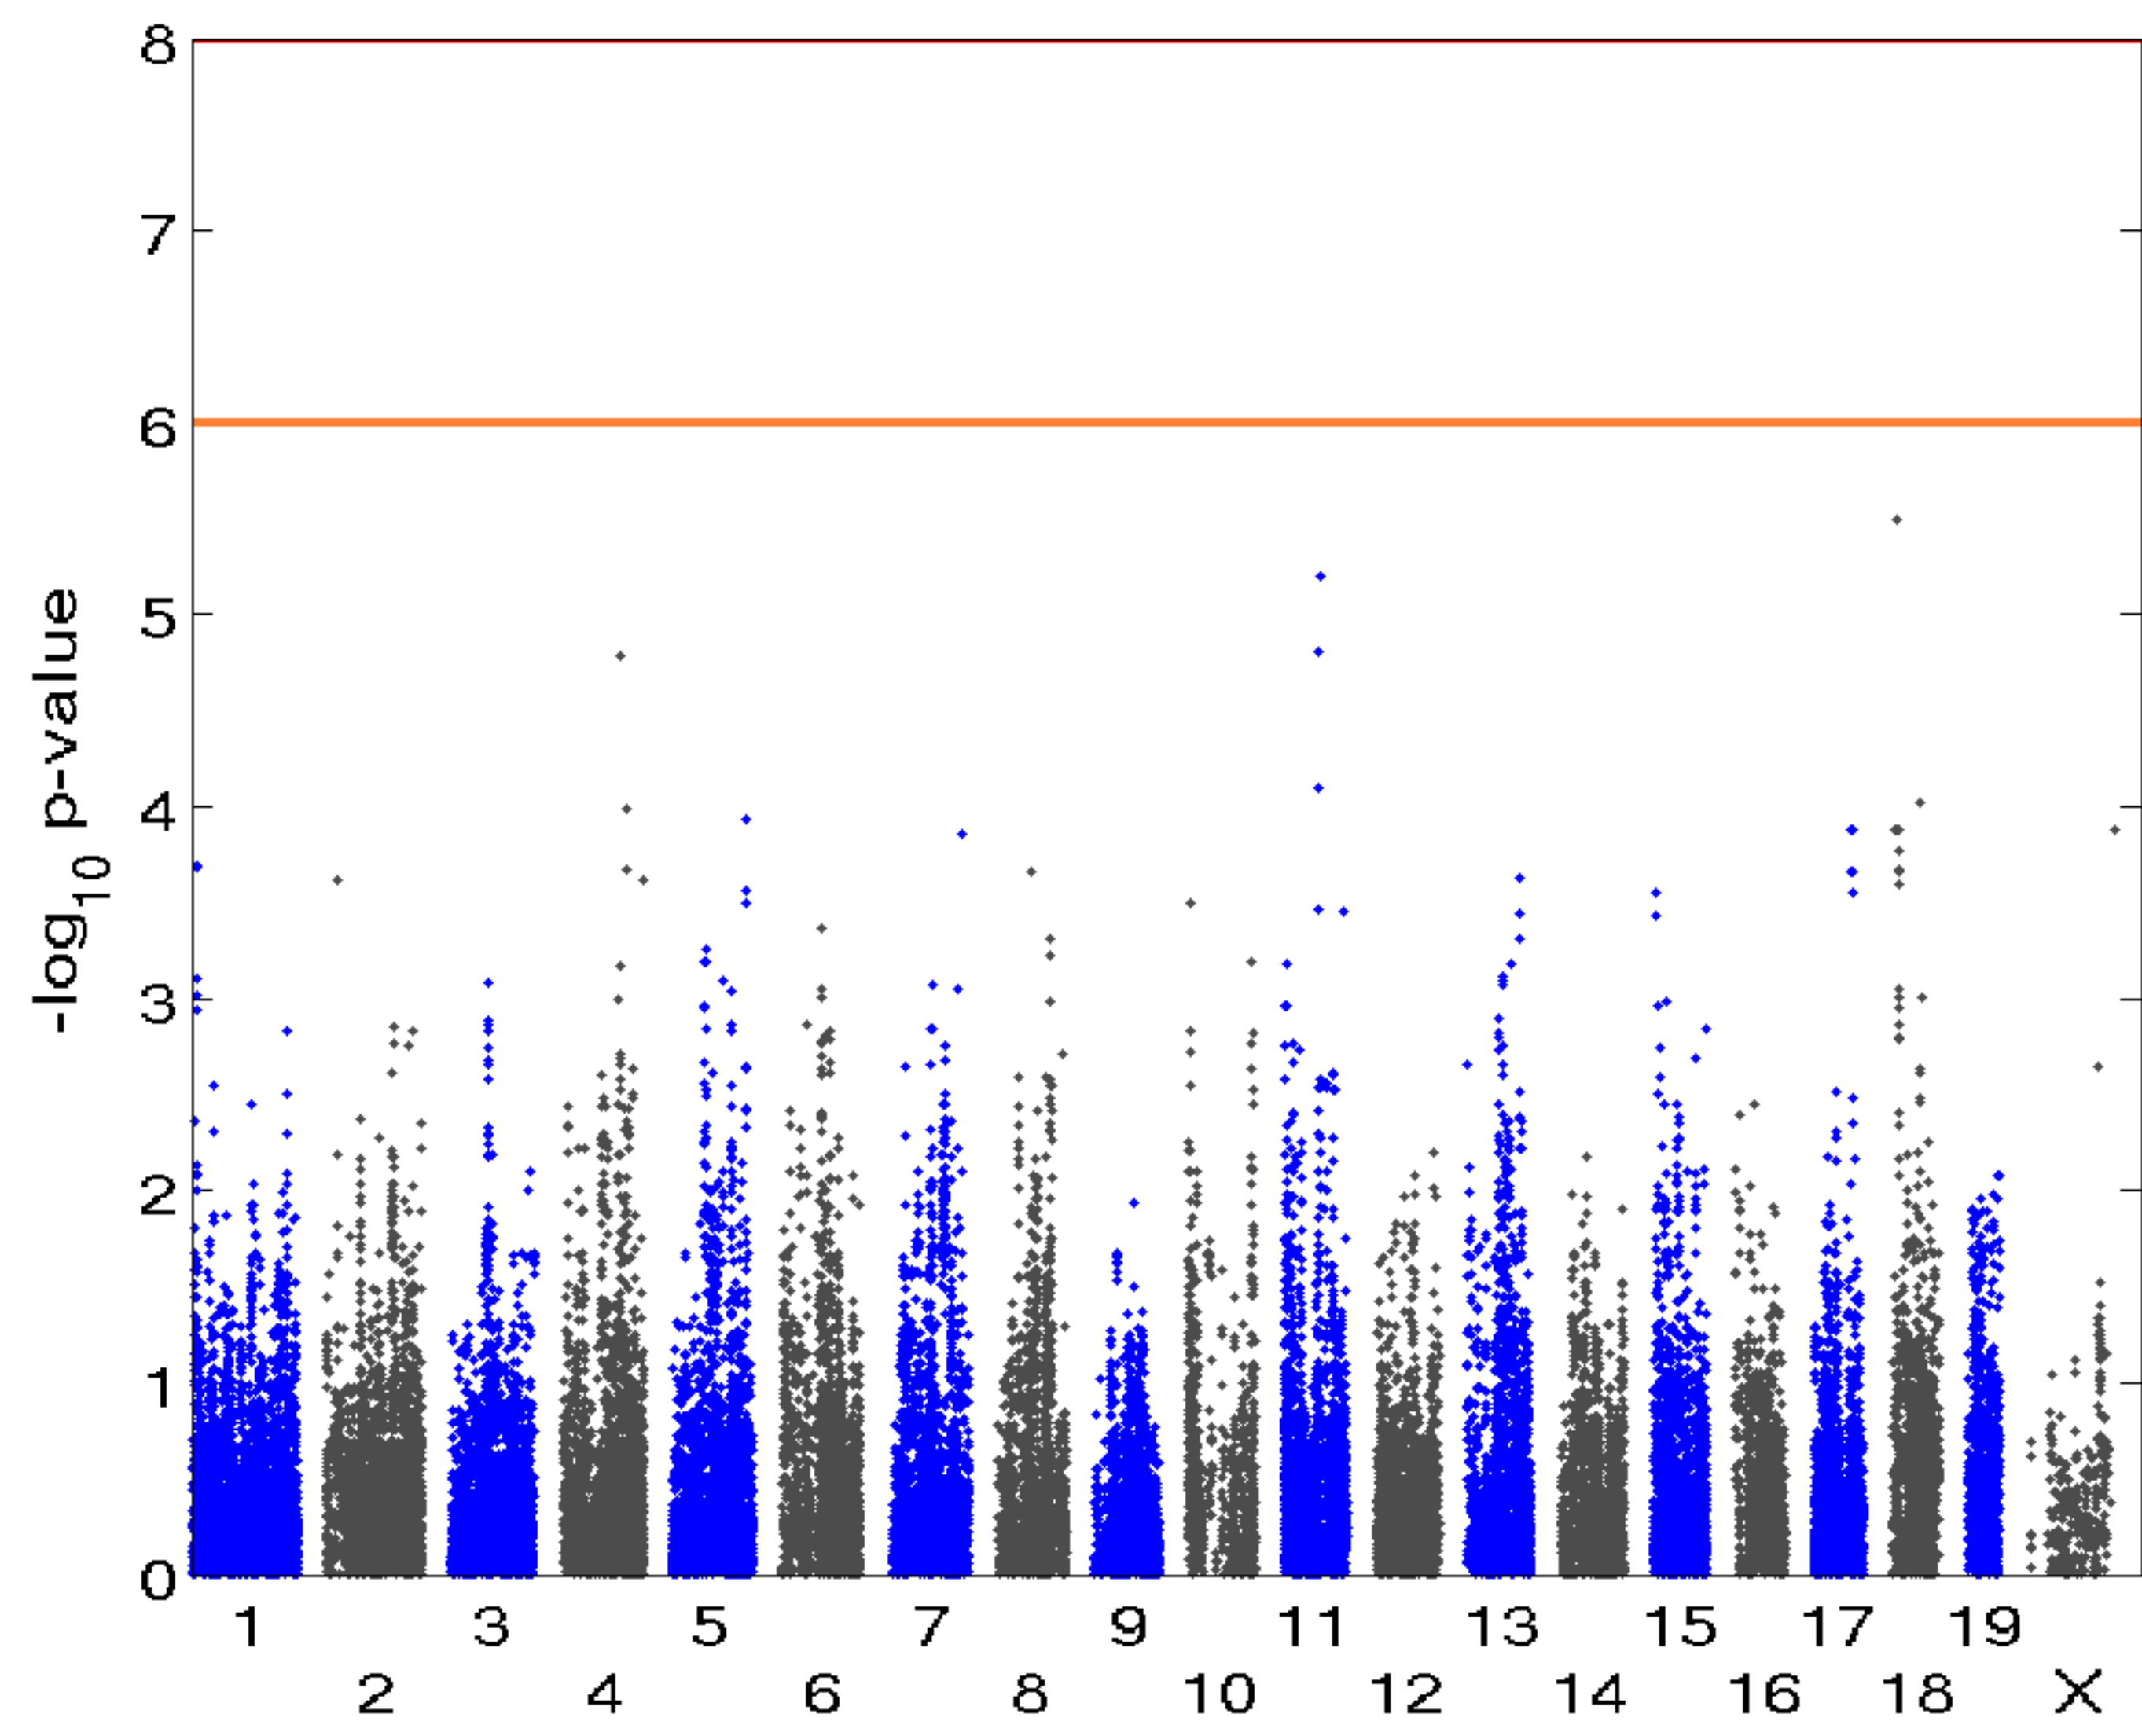

QT - iso10 vs ctr

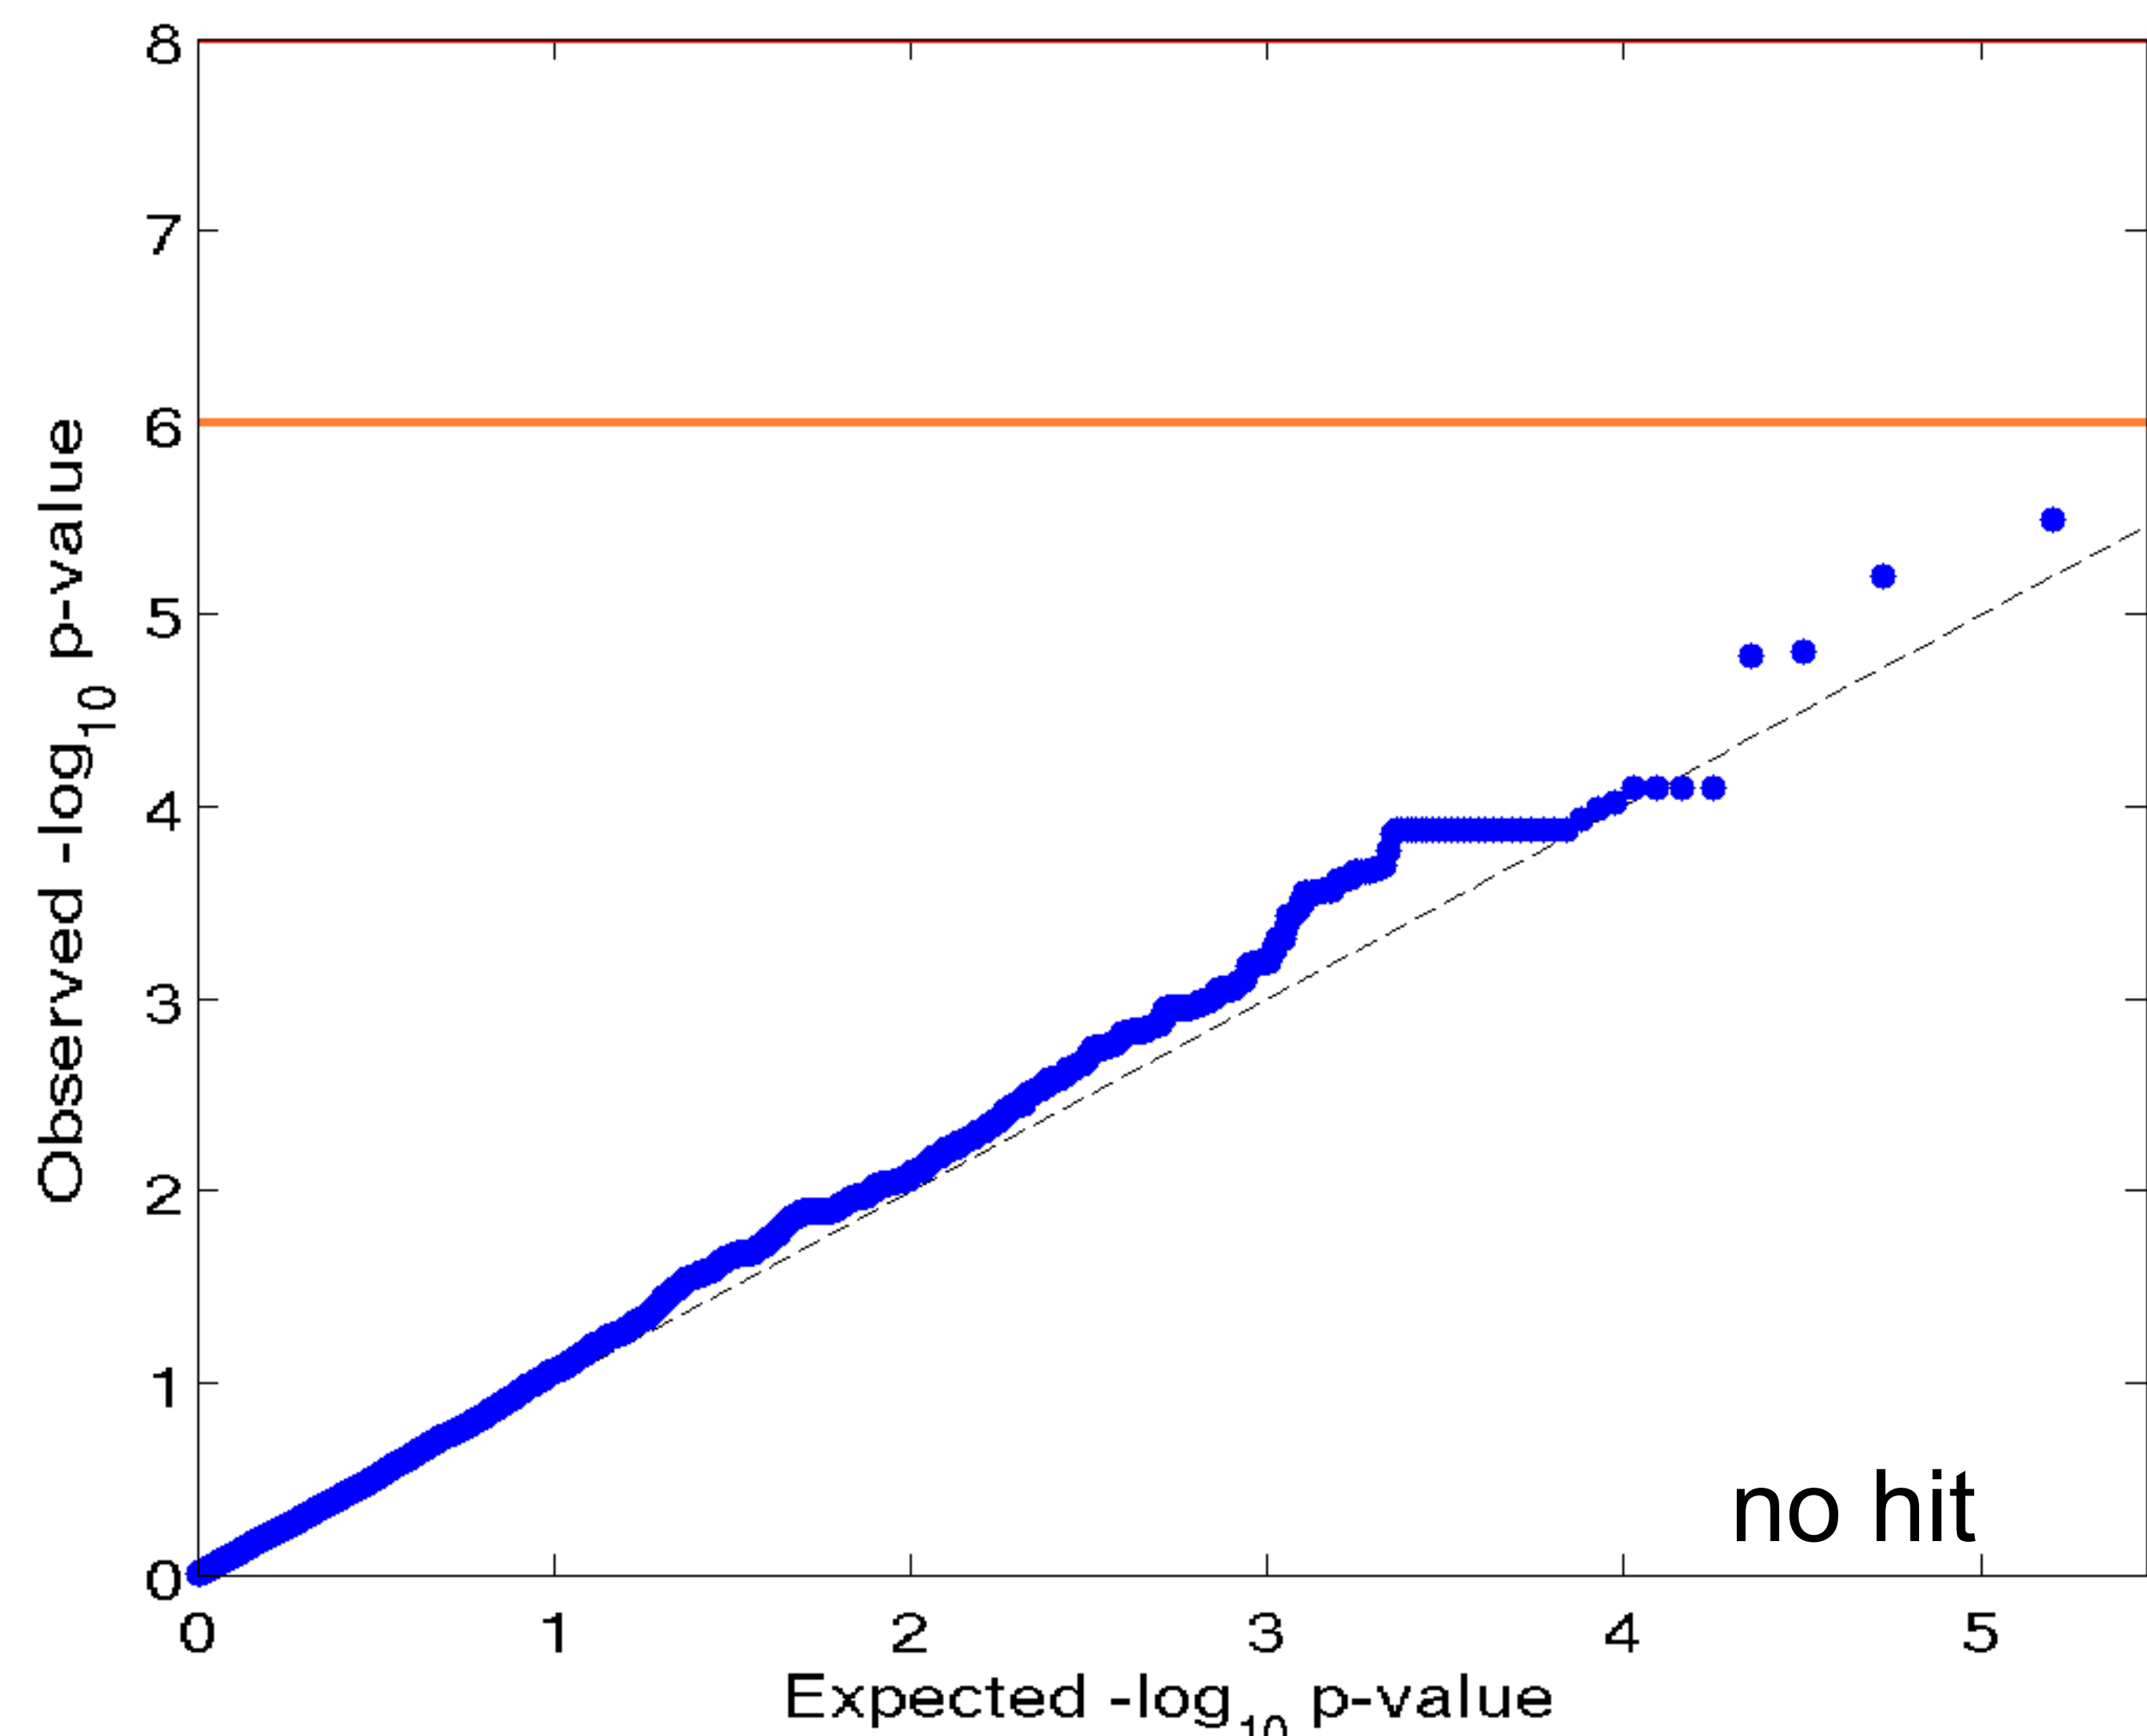



Ramp - iso10 vs ctr

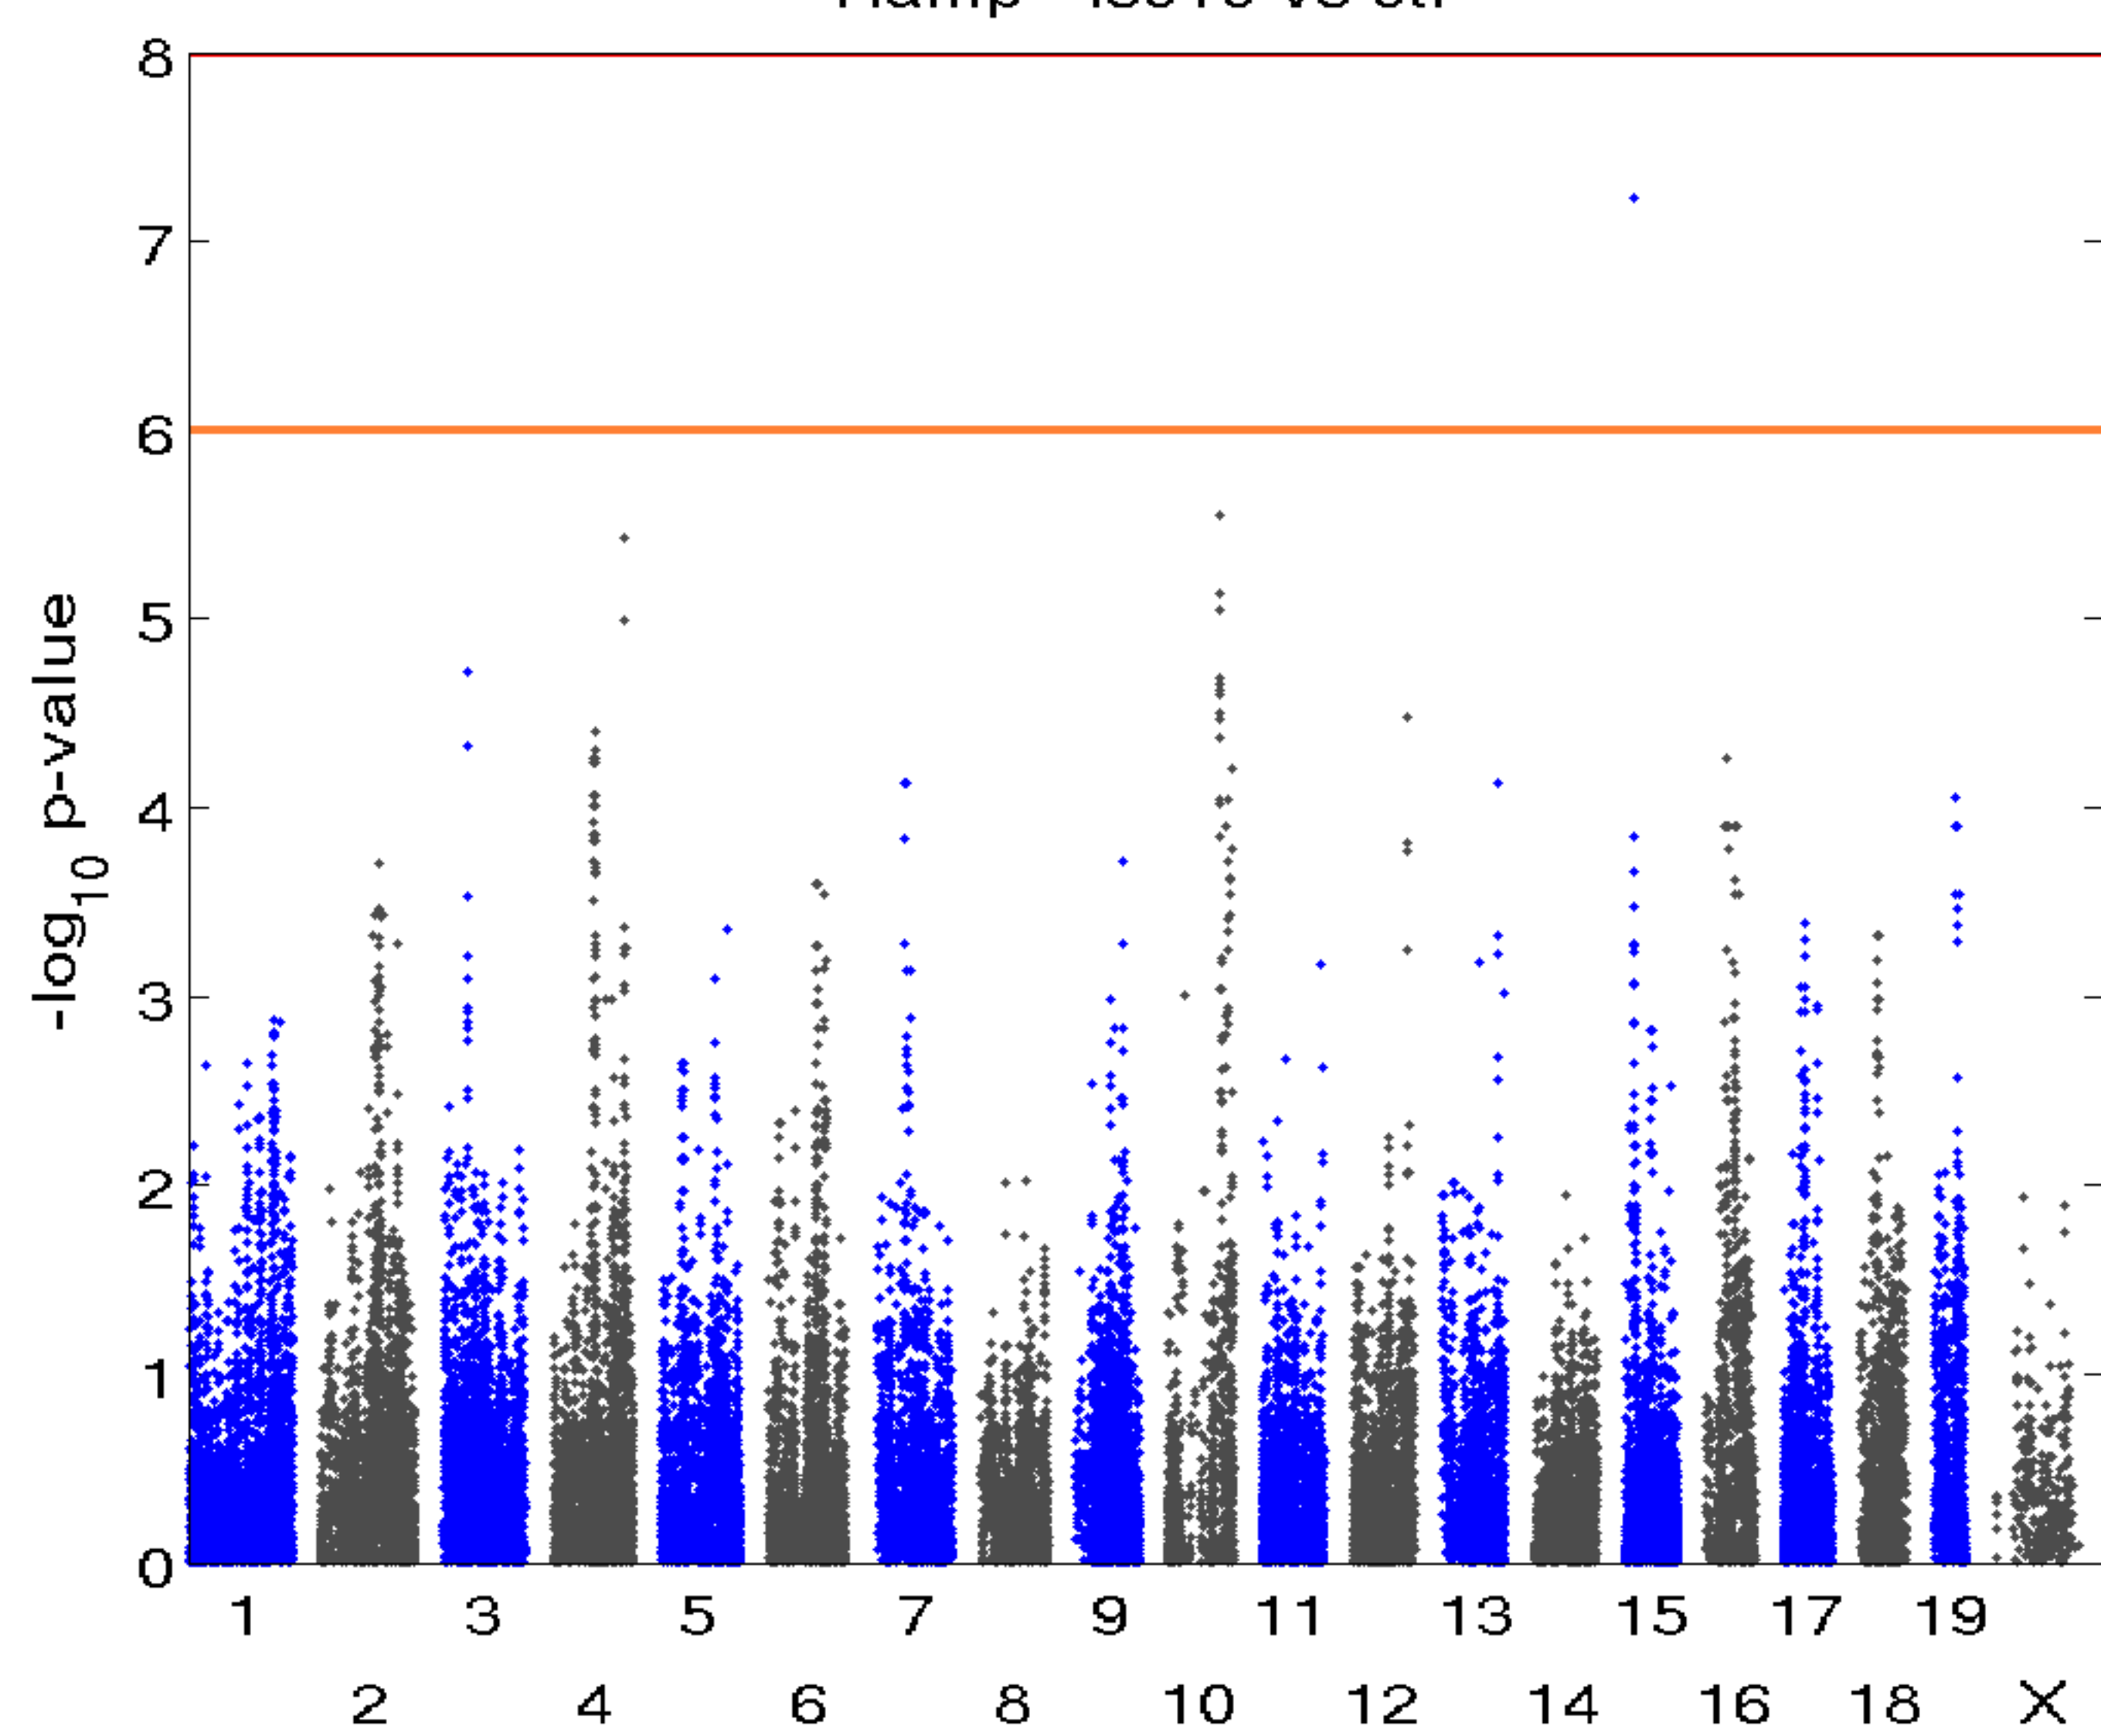

Ramp - iso10 vs ctr

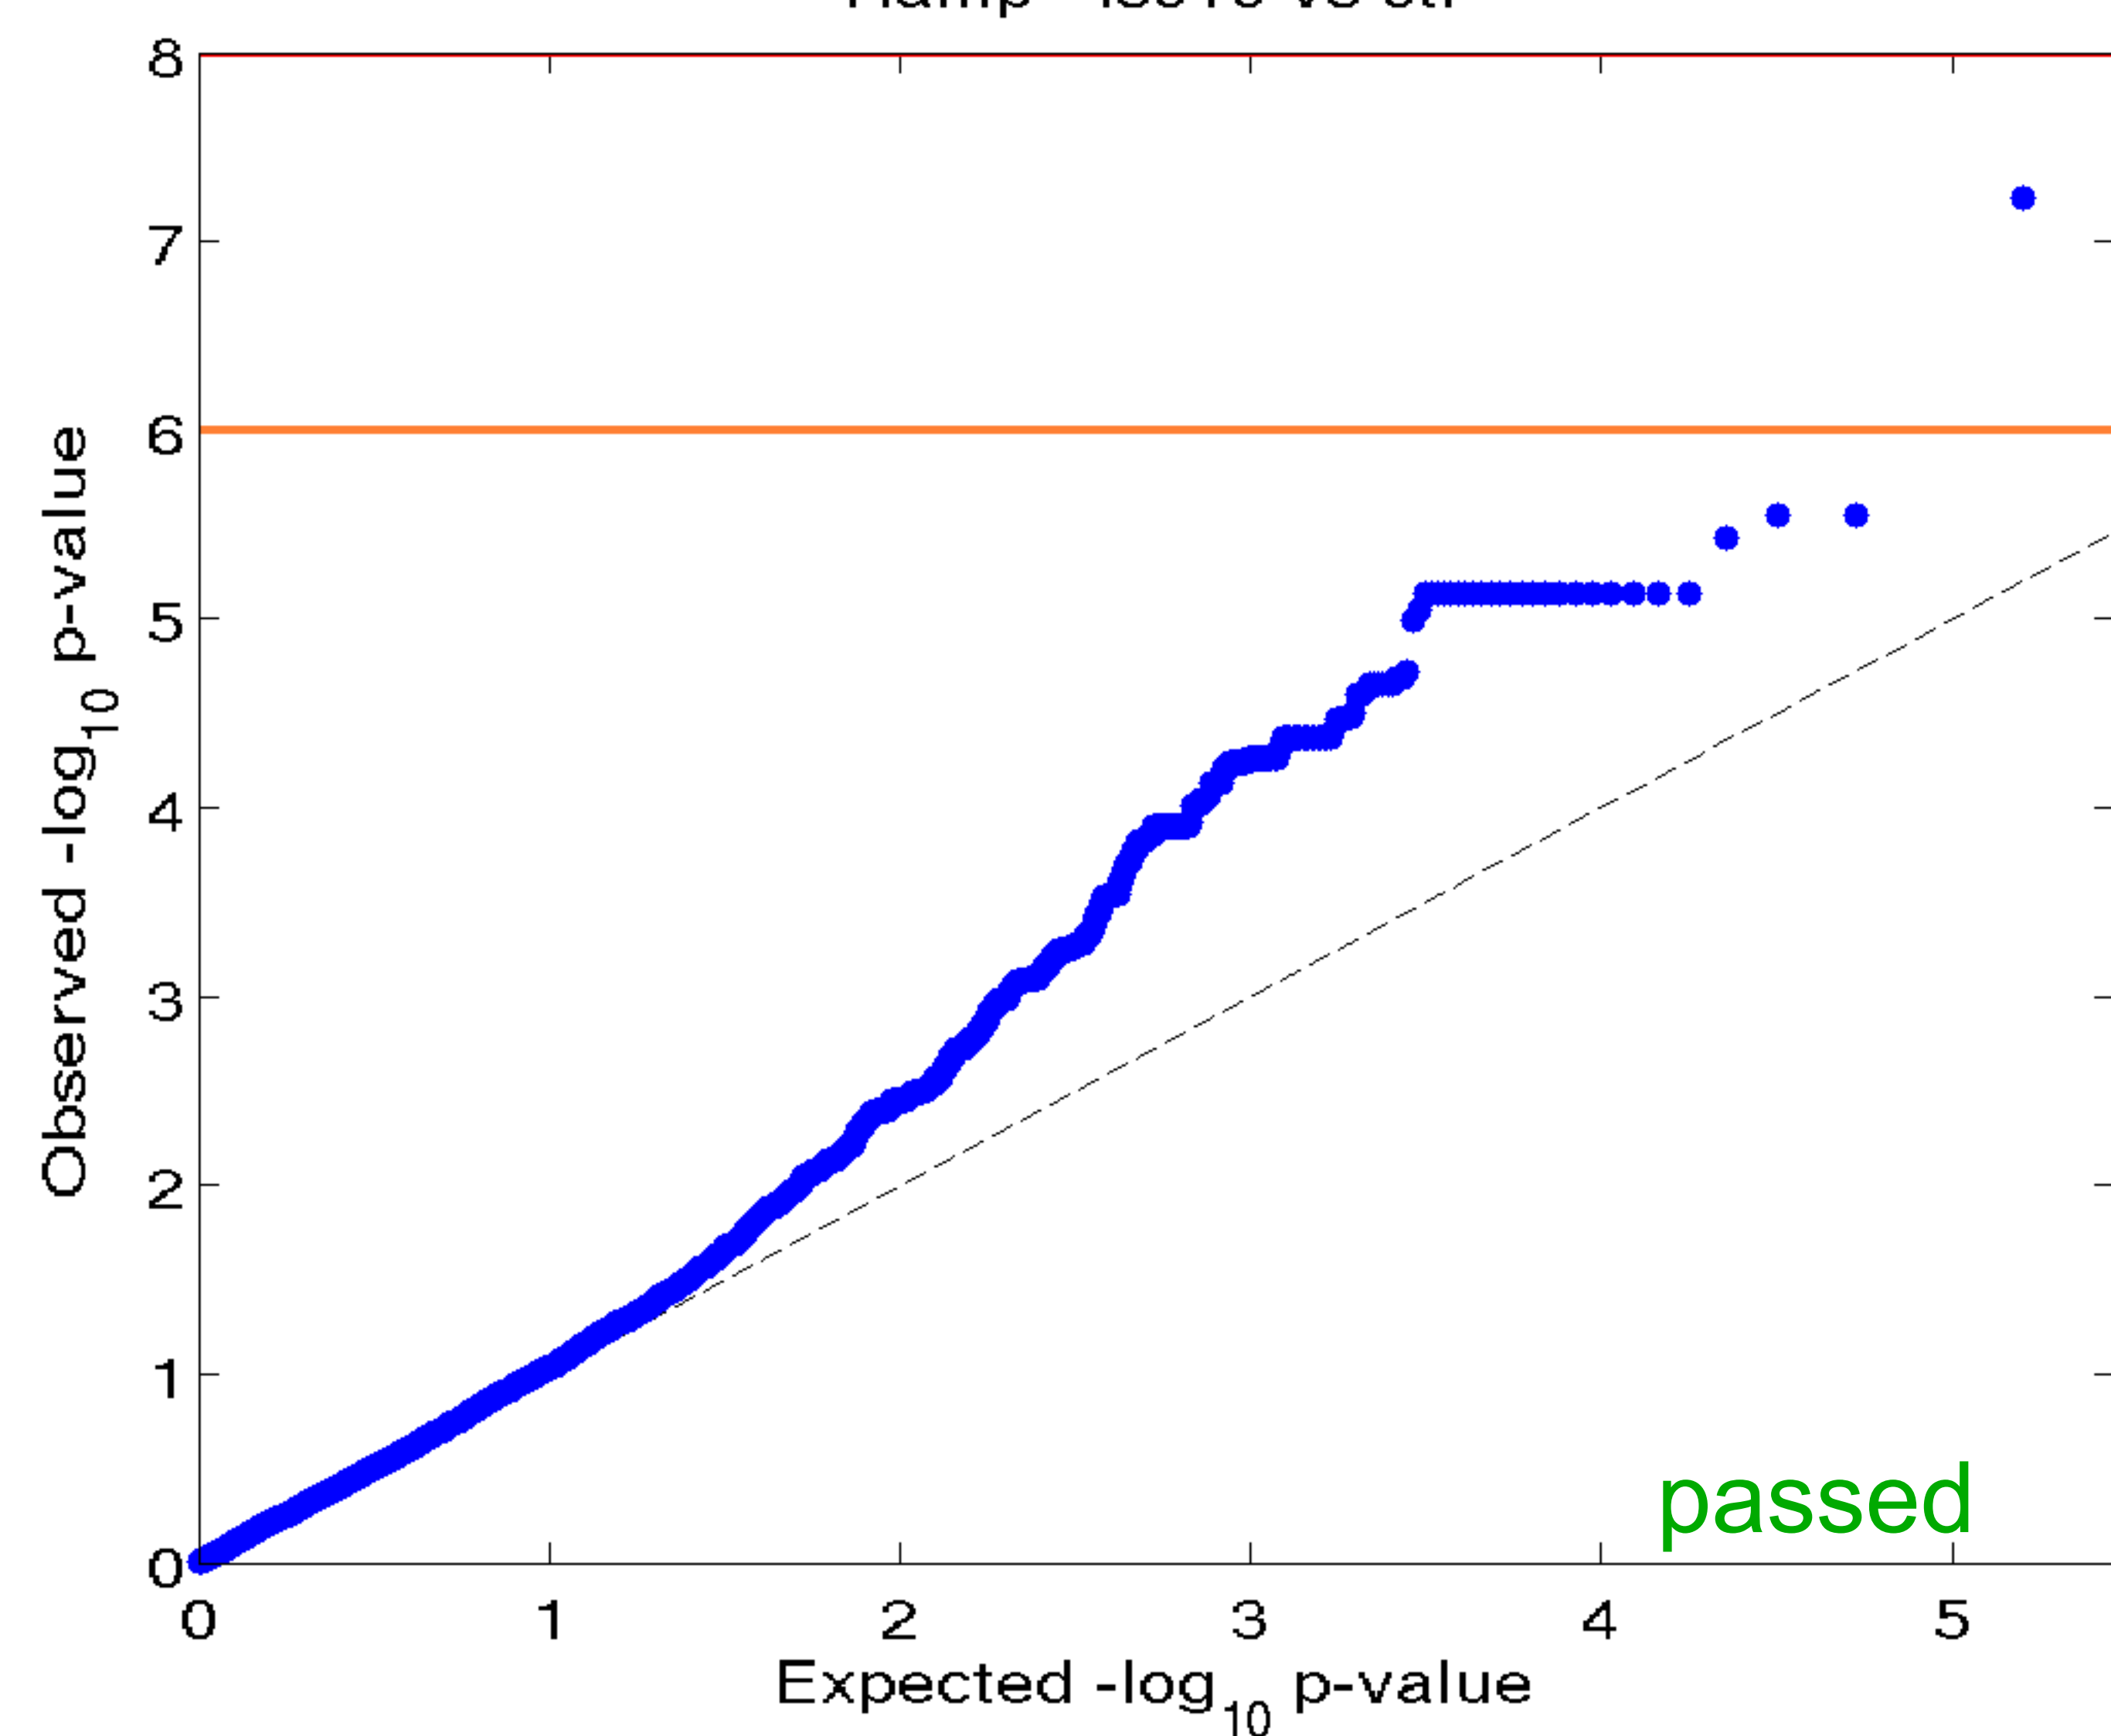

RR - iso10 vs ctr

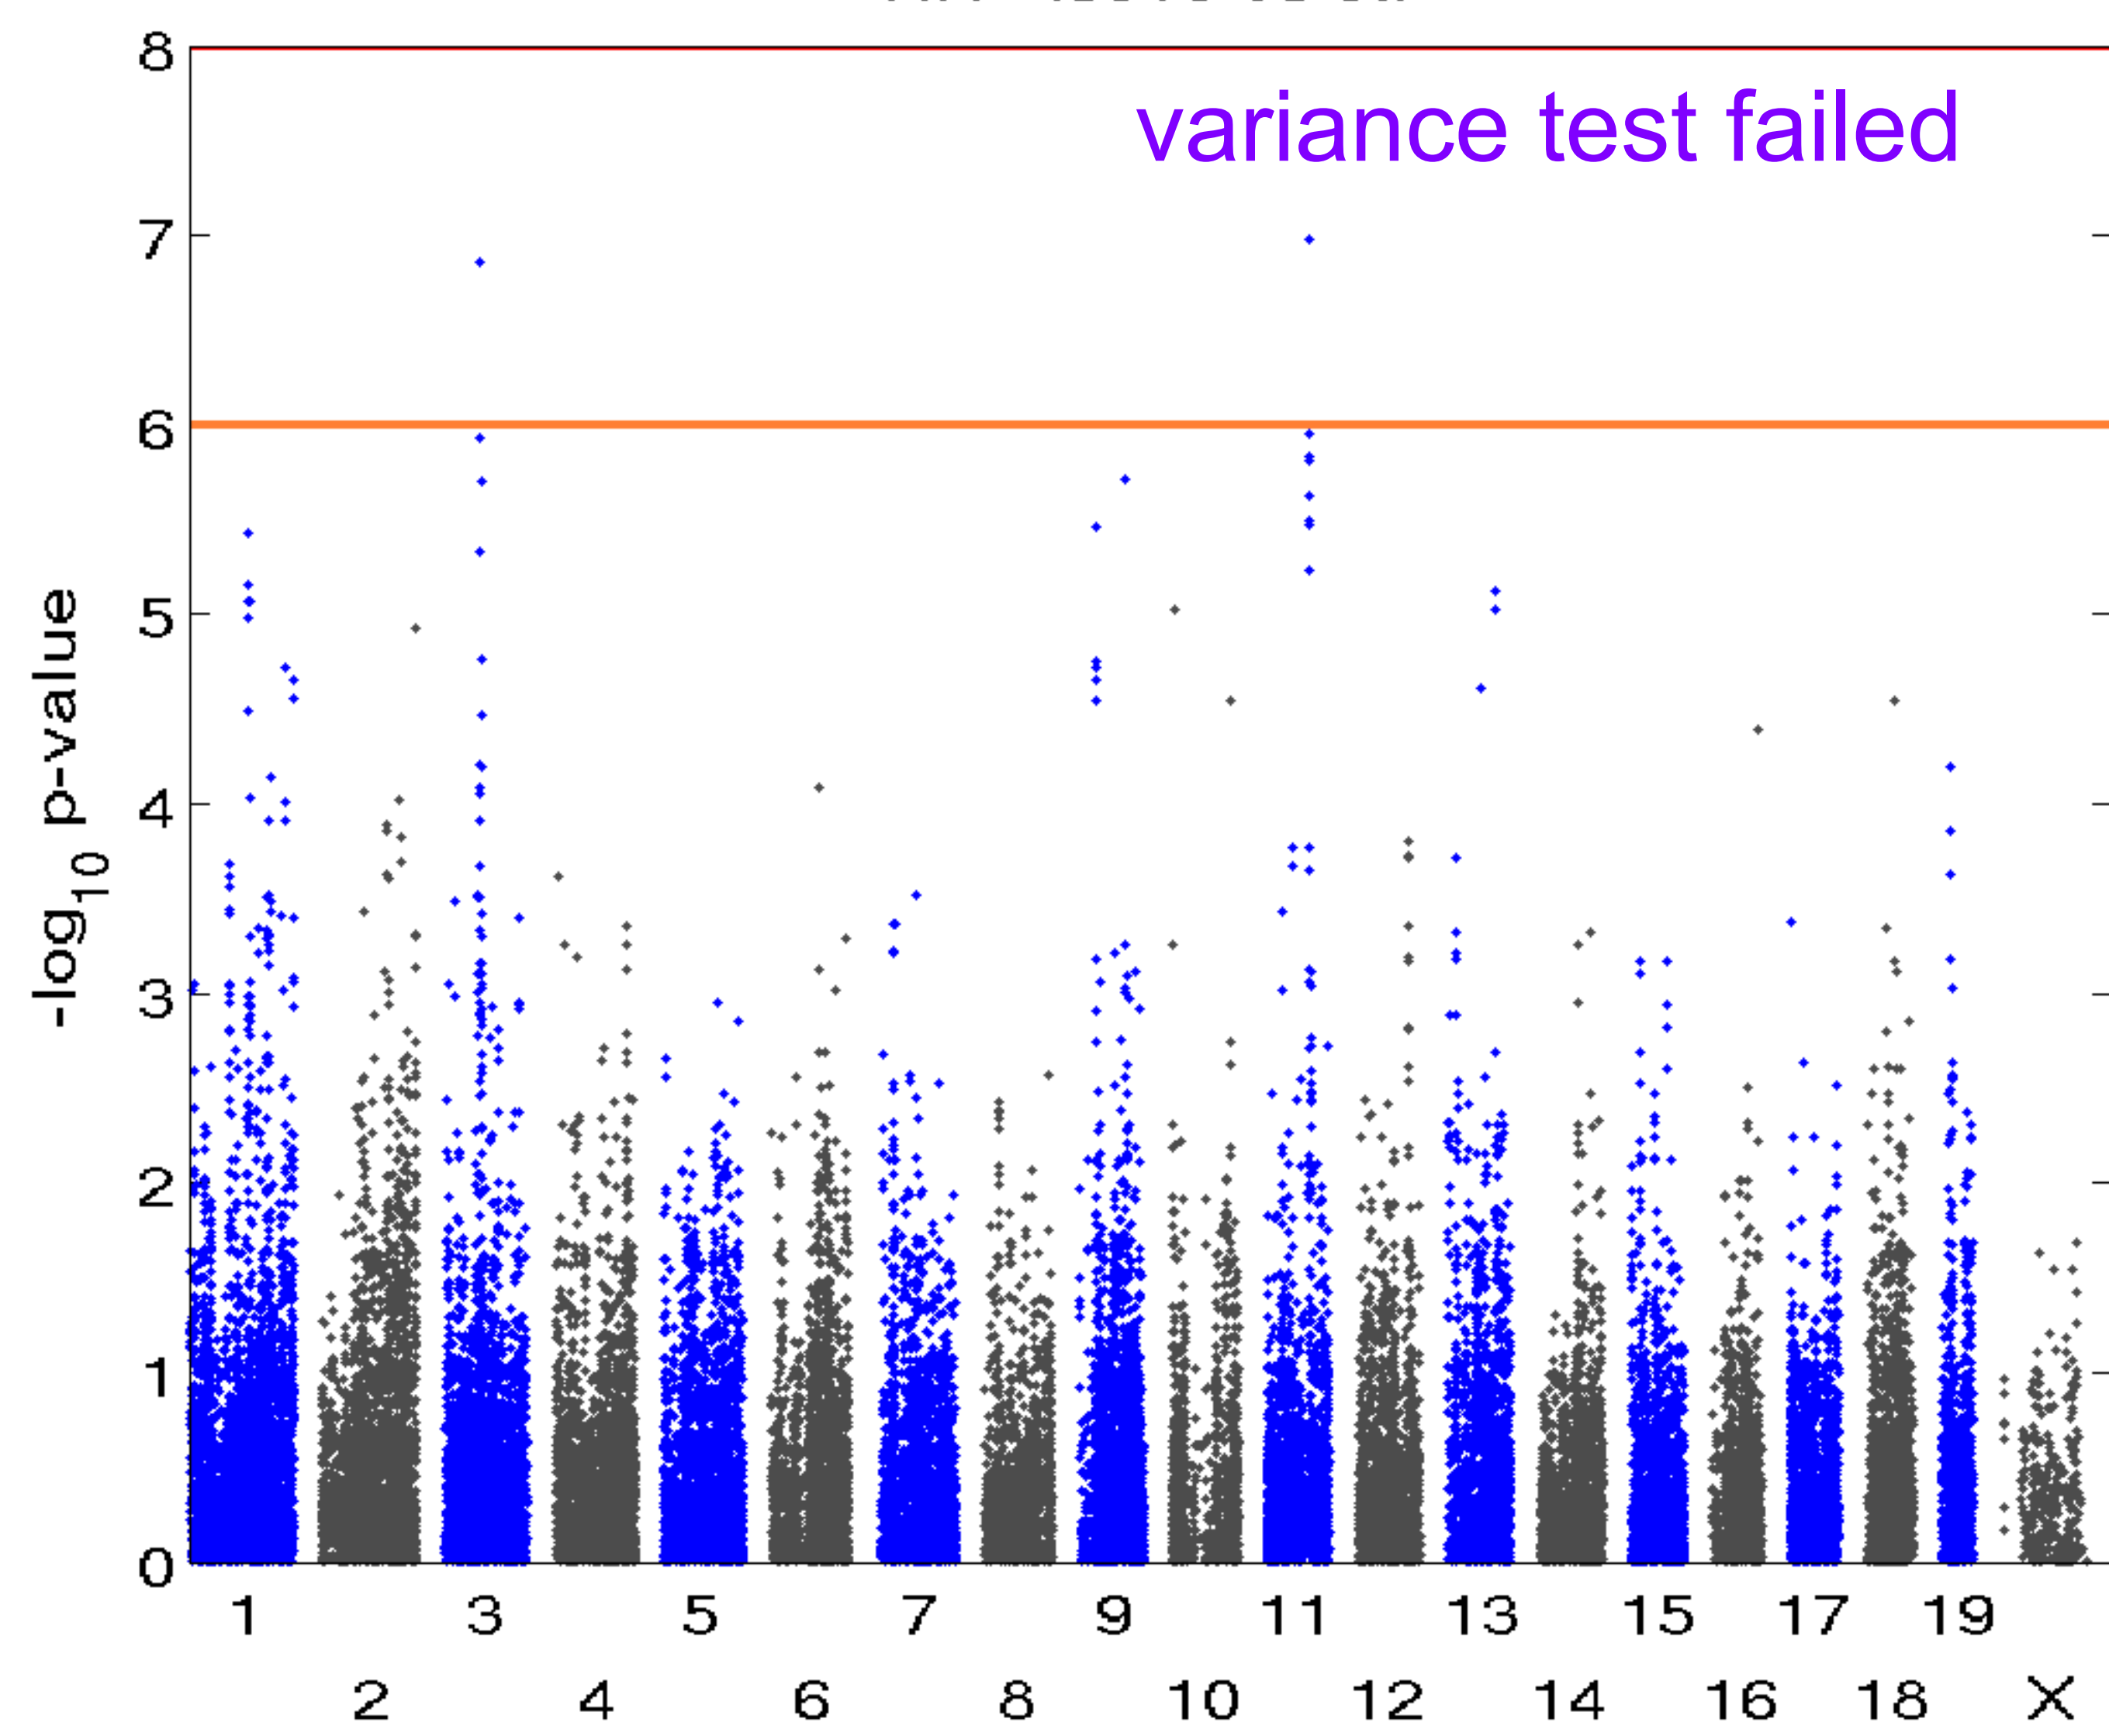

RR - iso10 vs ctr

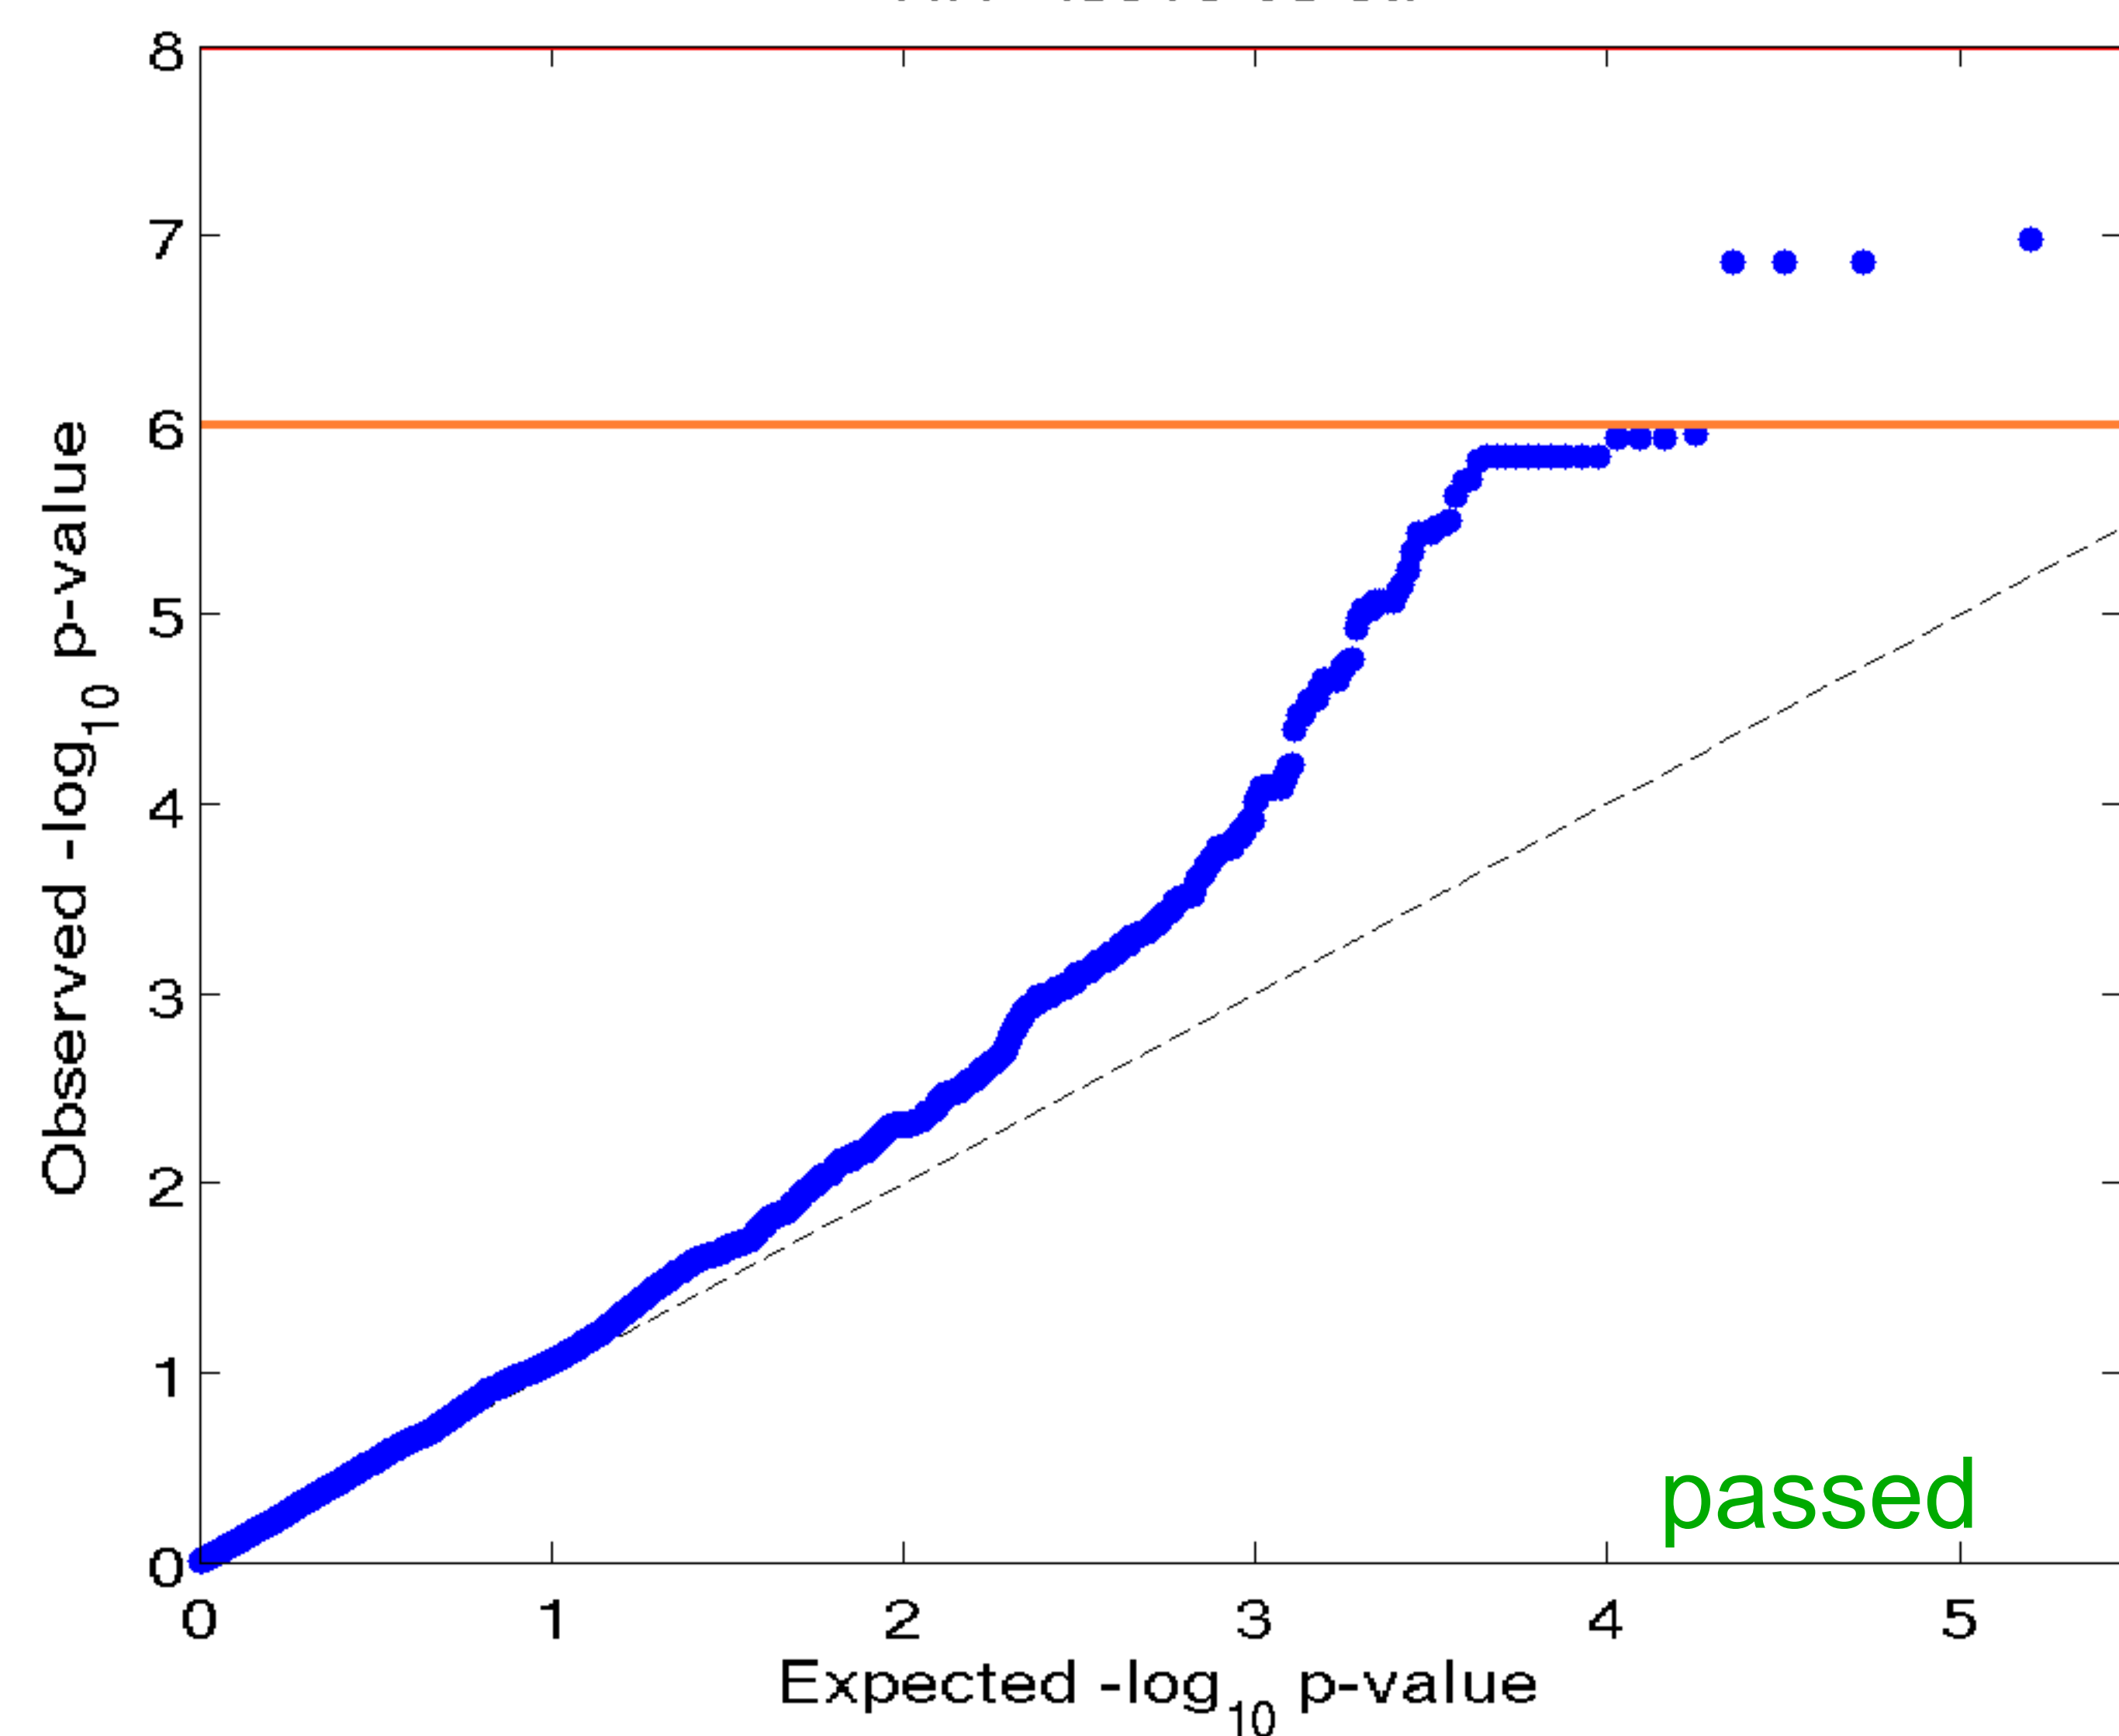

Samp - iso10 vs ctr

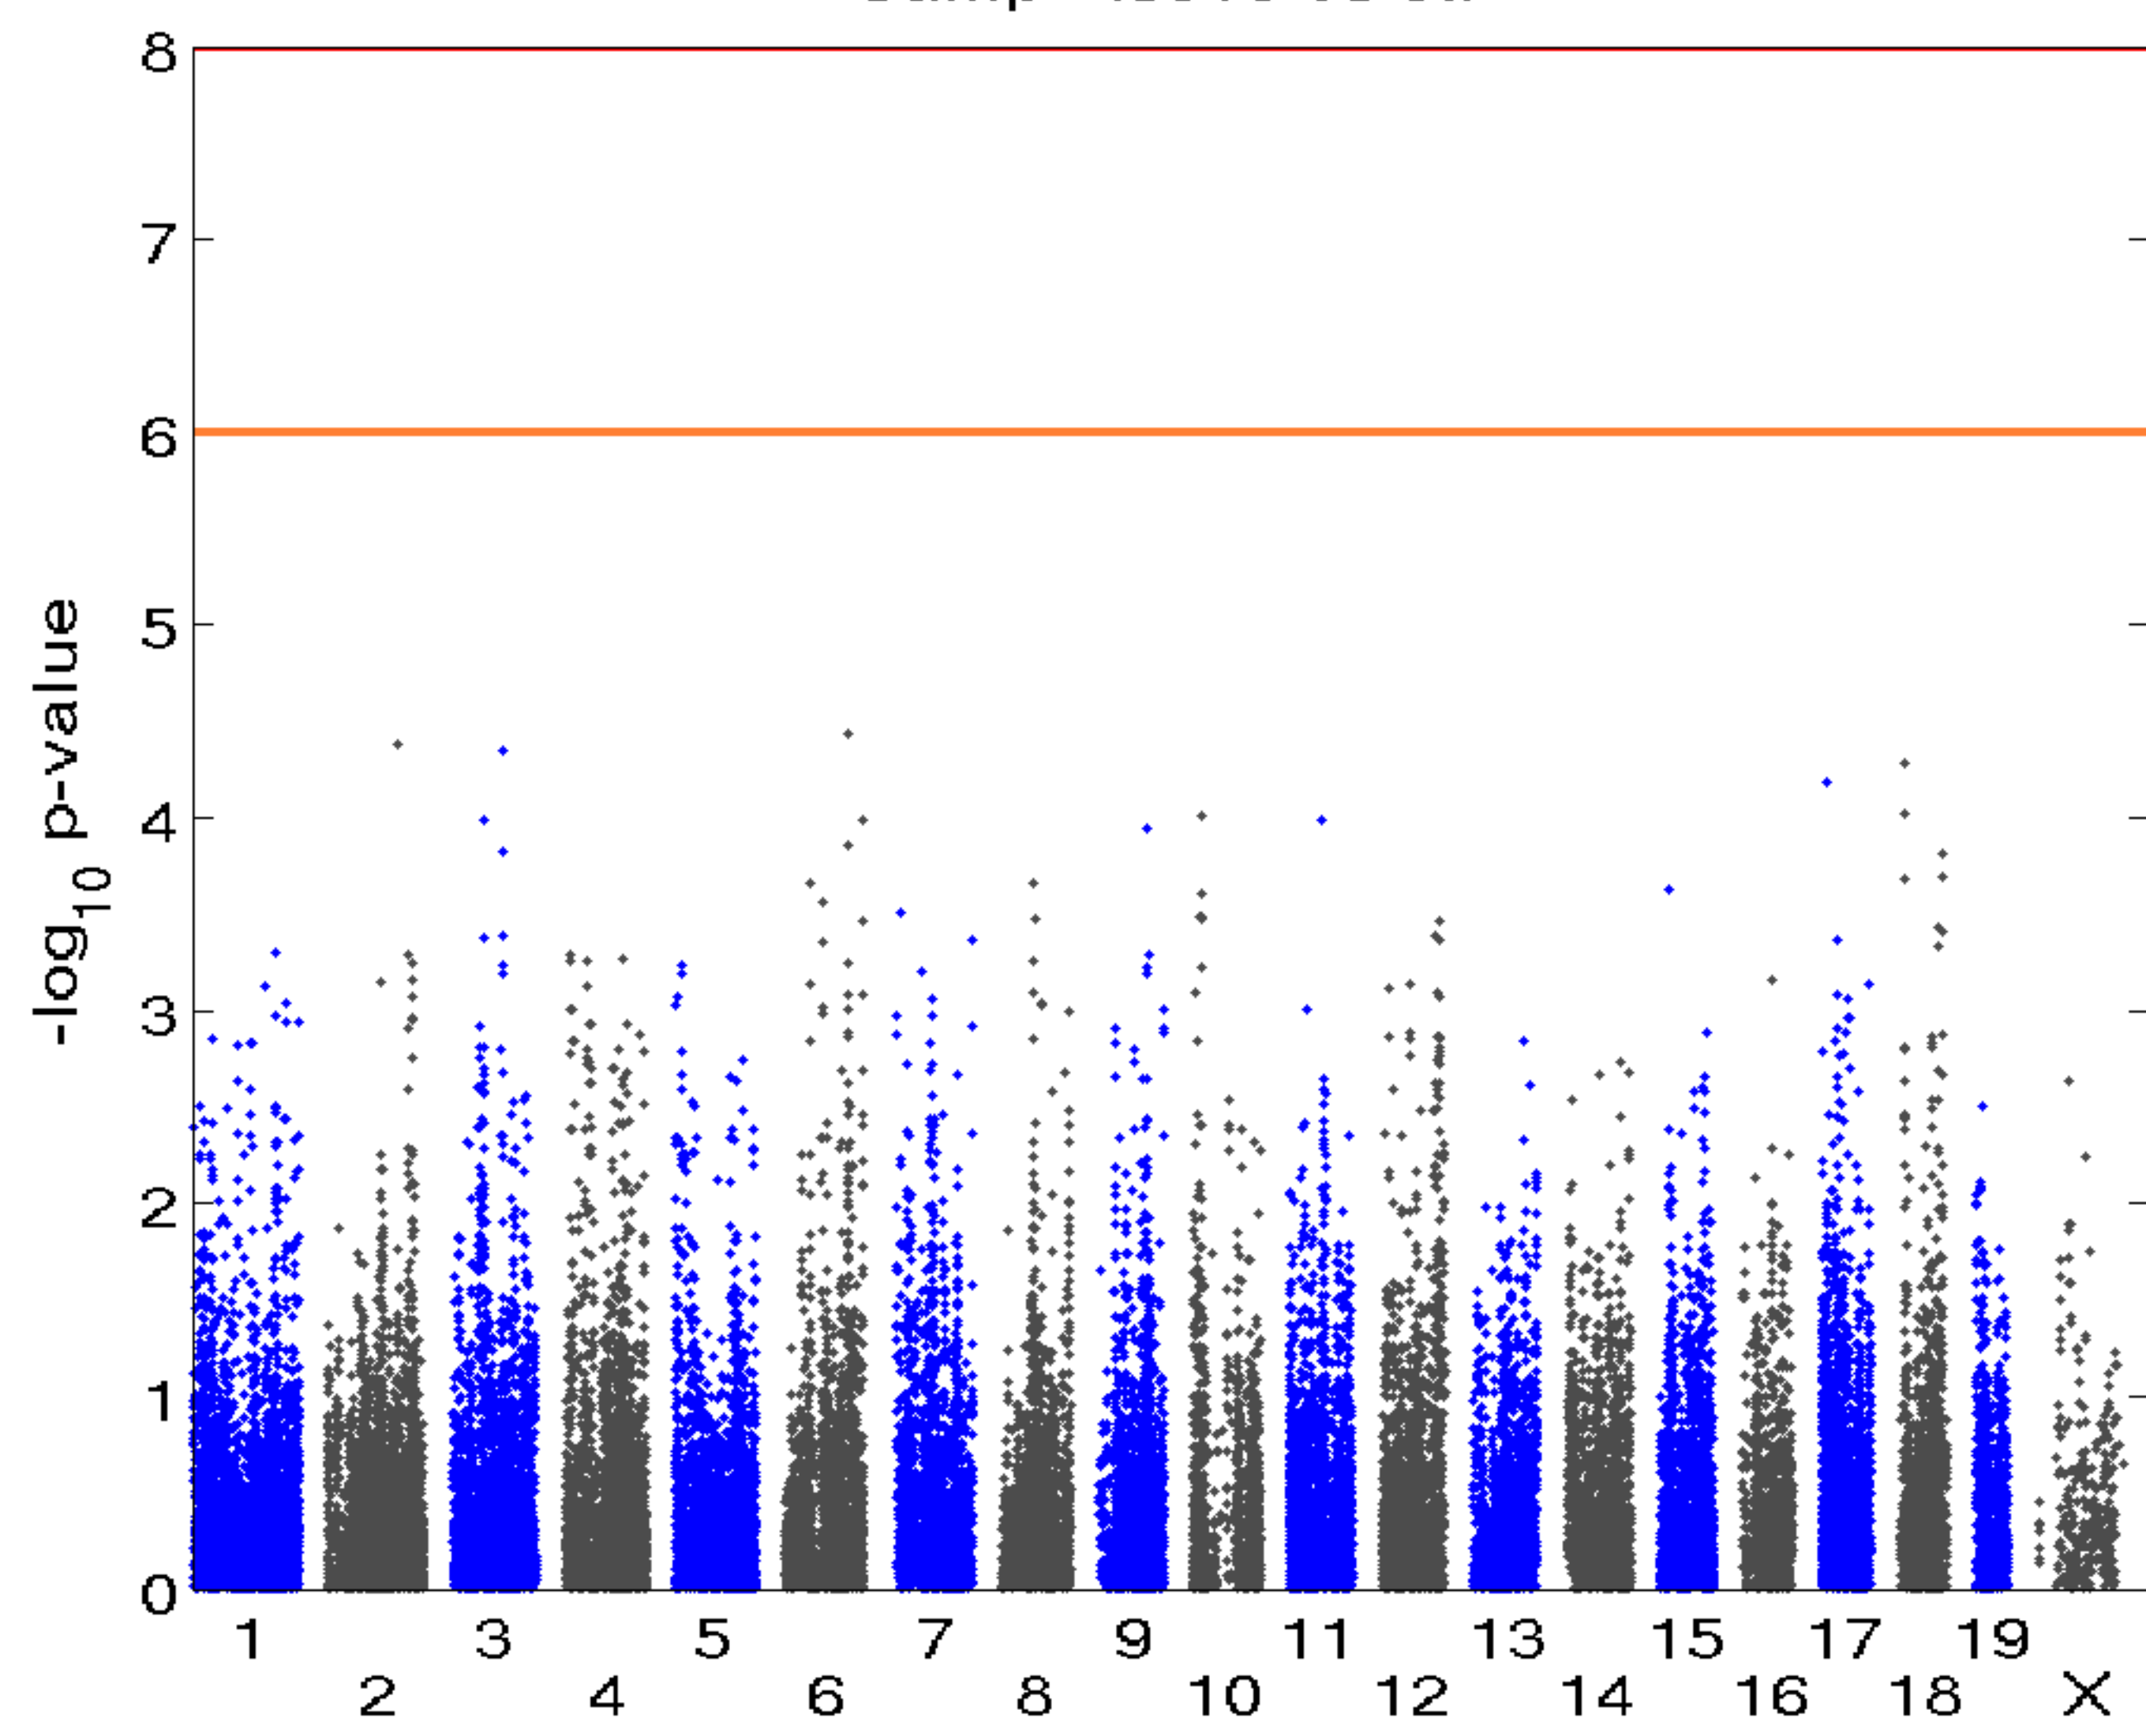

Samp - iso10 vs ctr

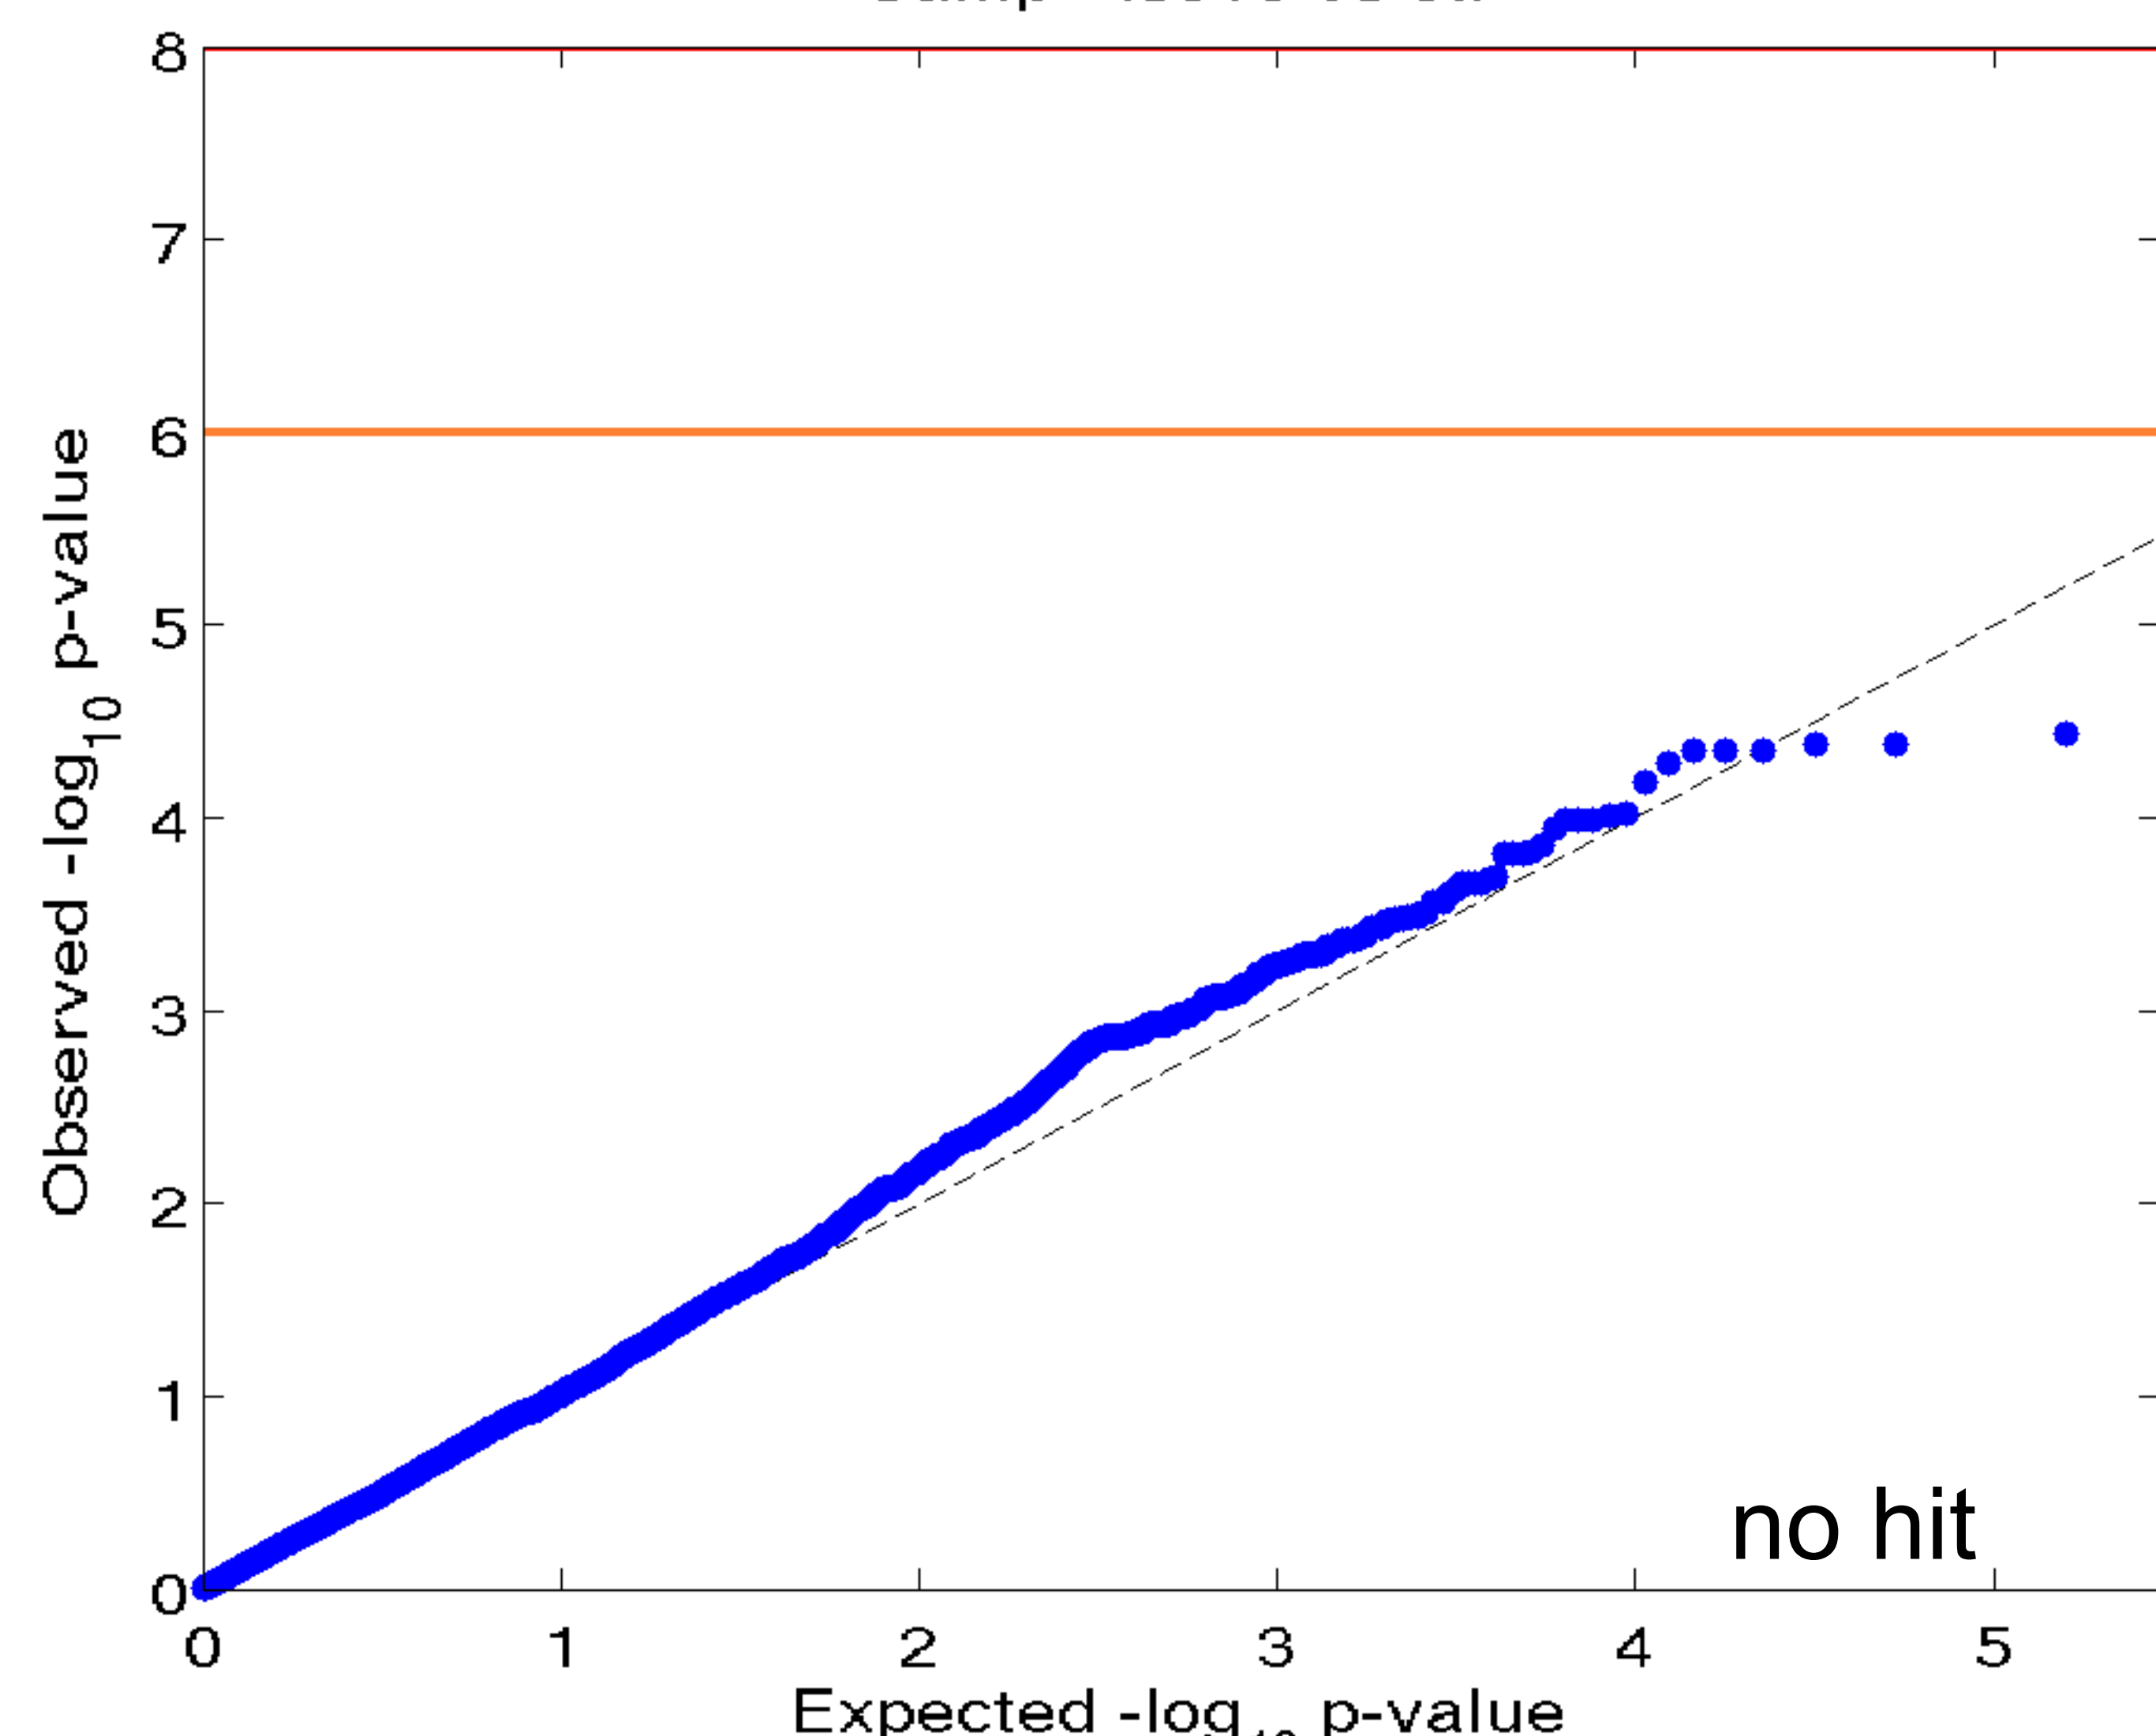

SBP - iso10 vs ctr

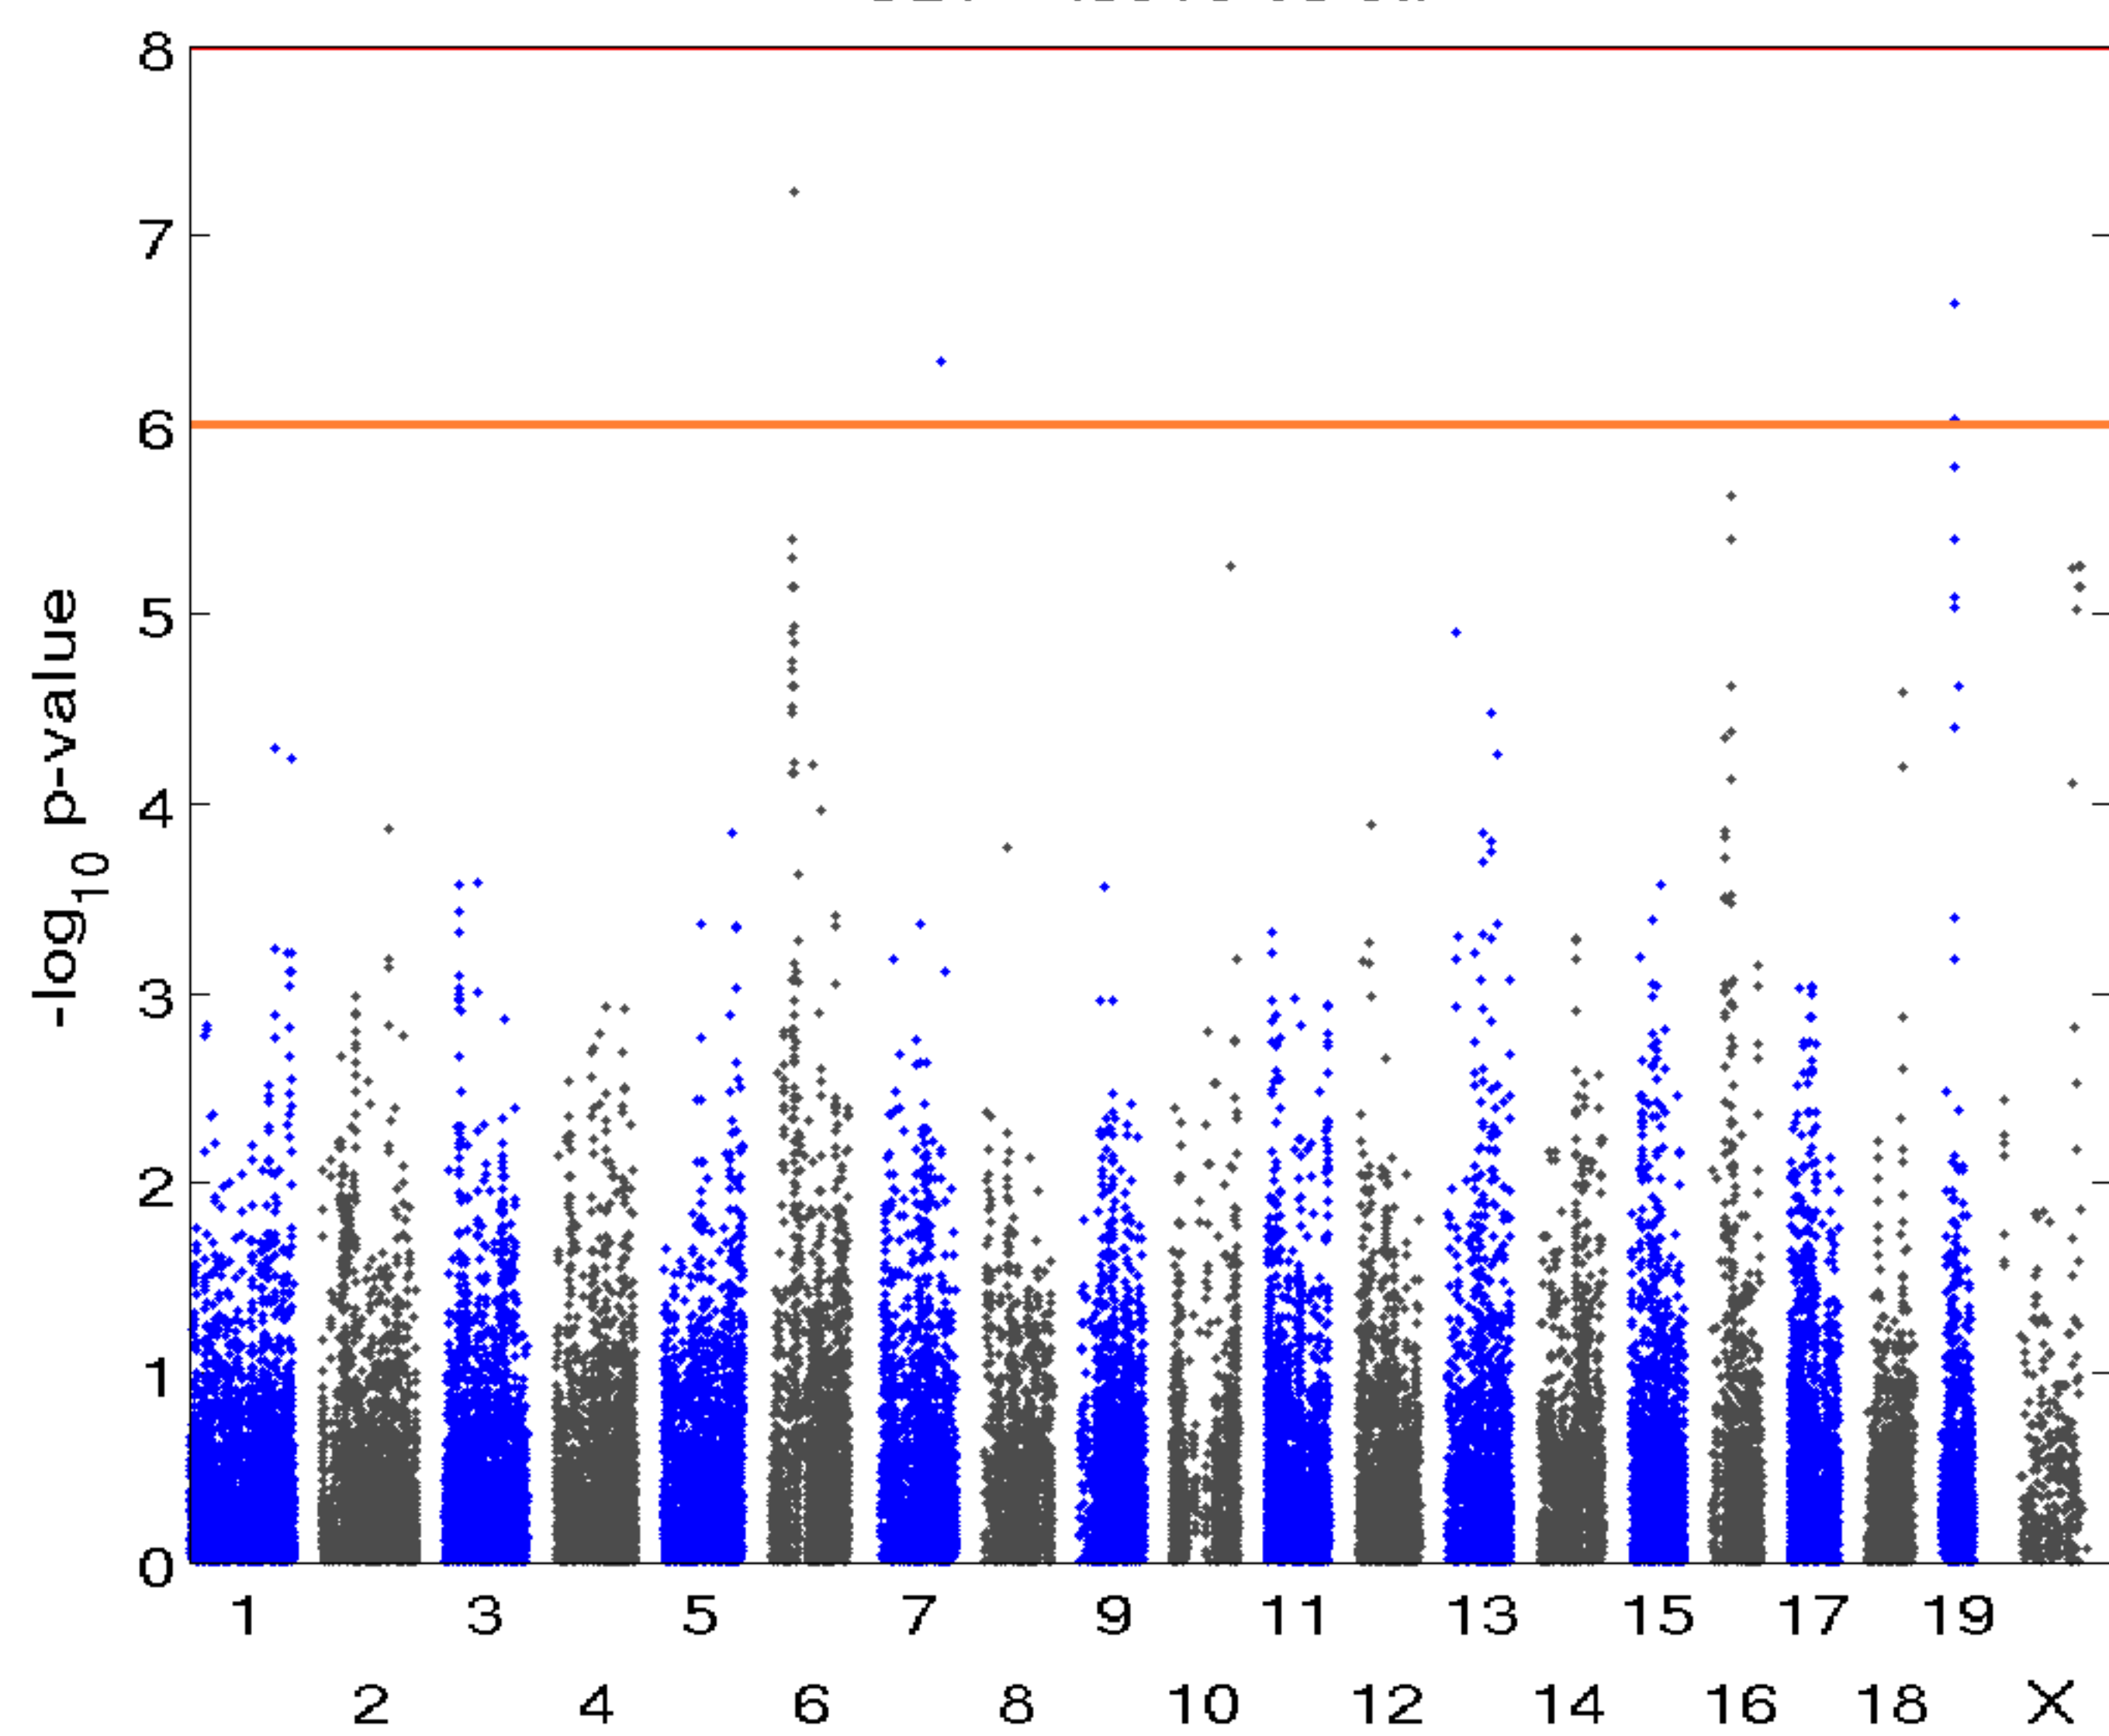

SBP - iso10 vs ctr

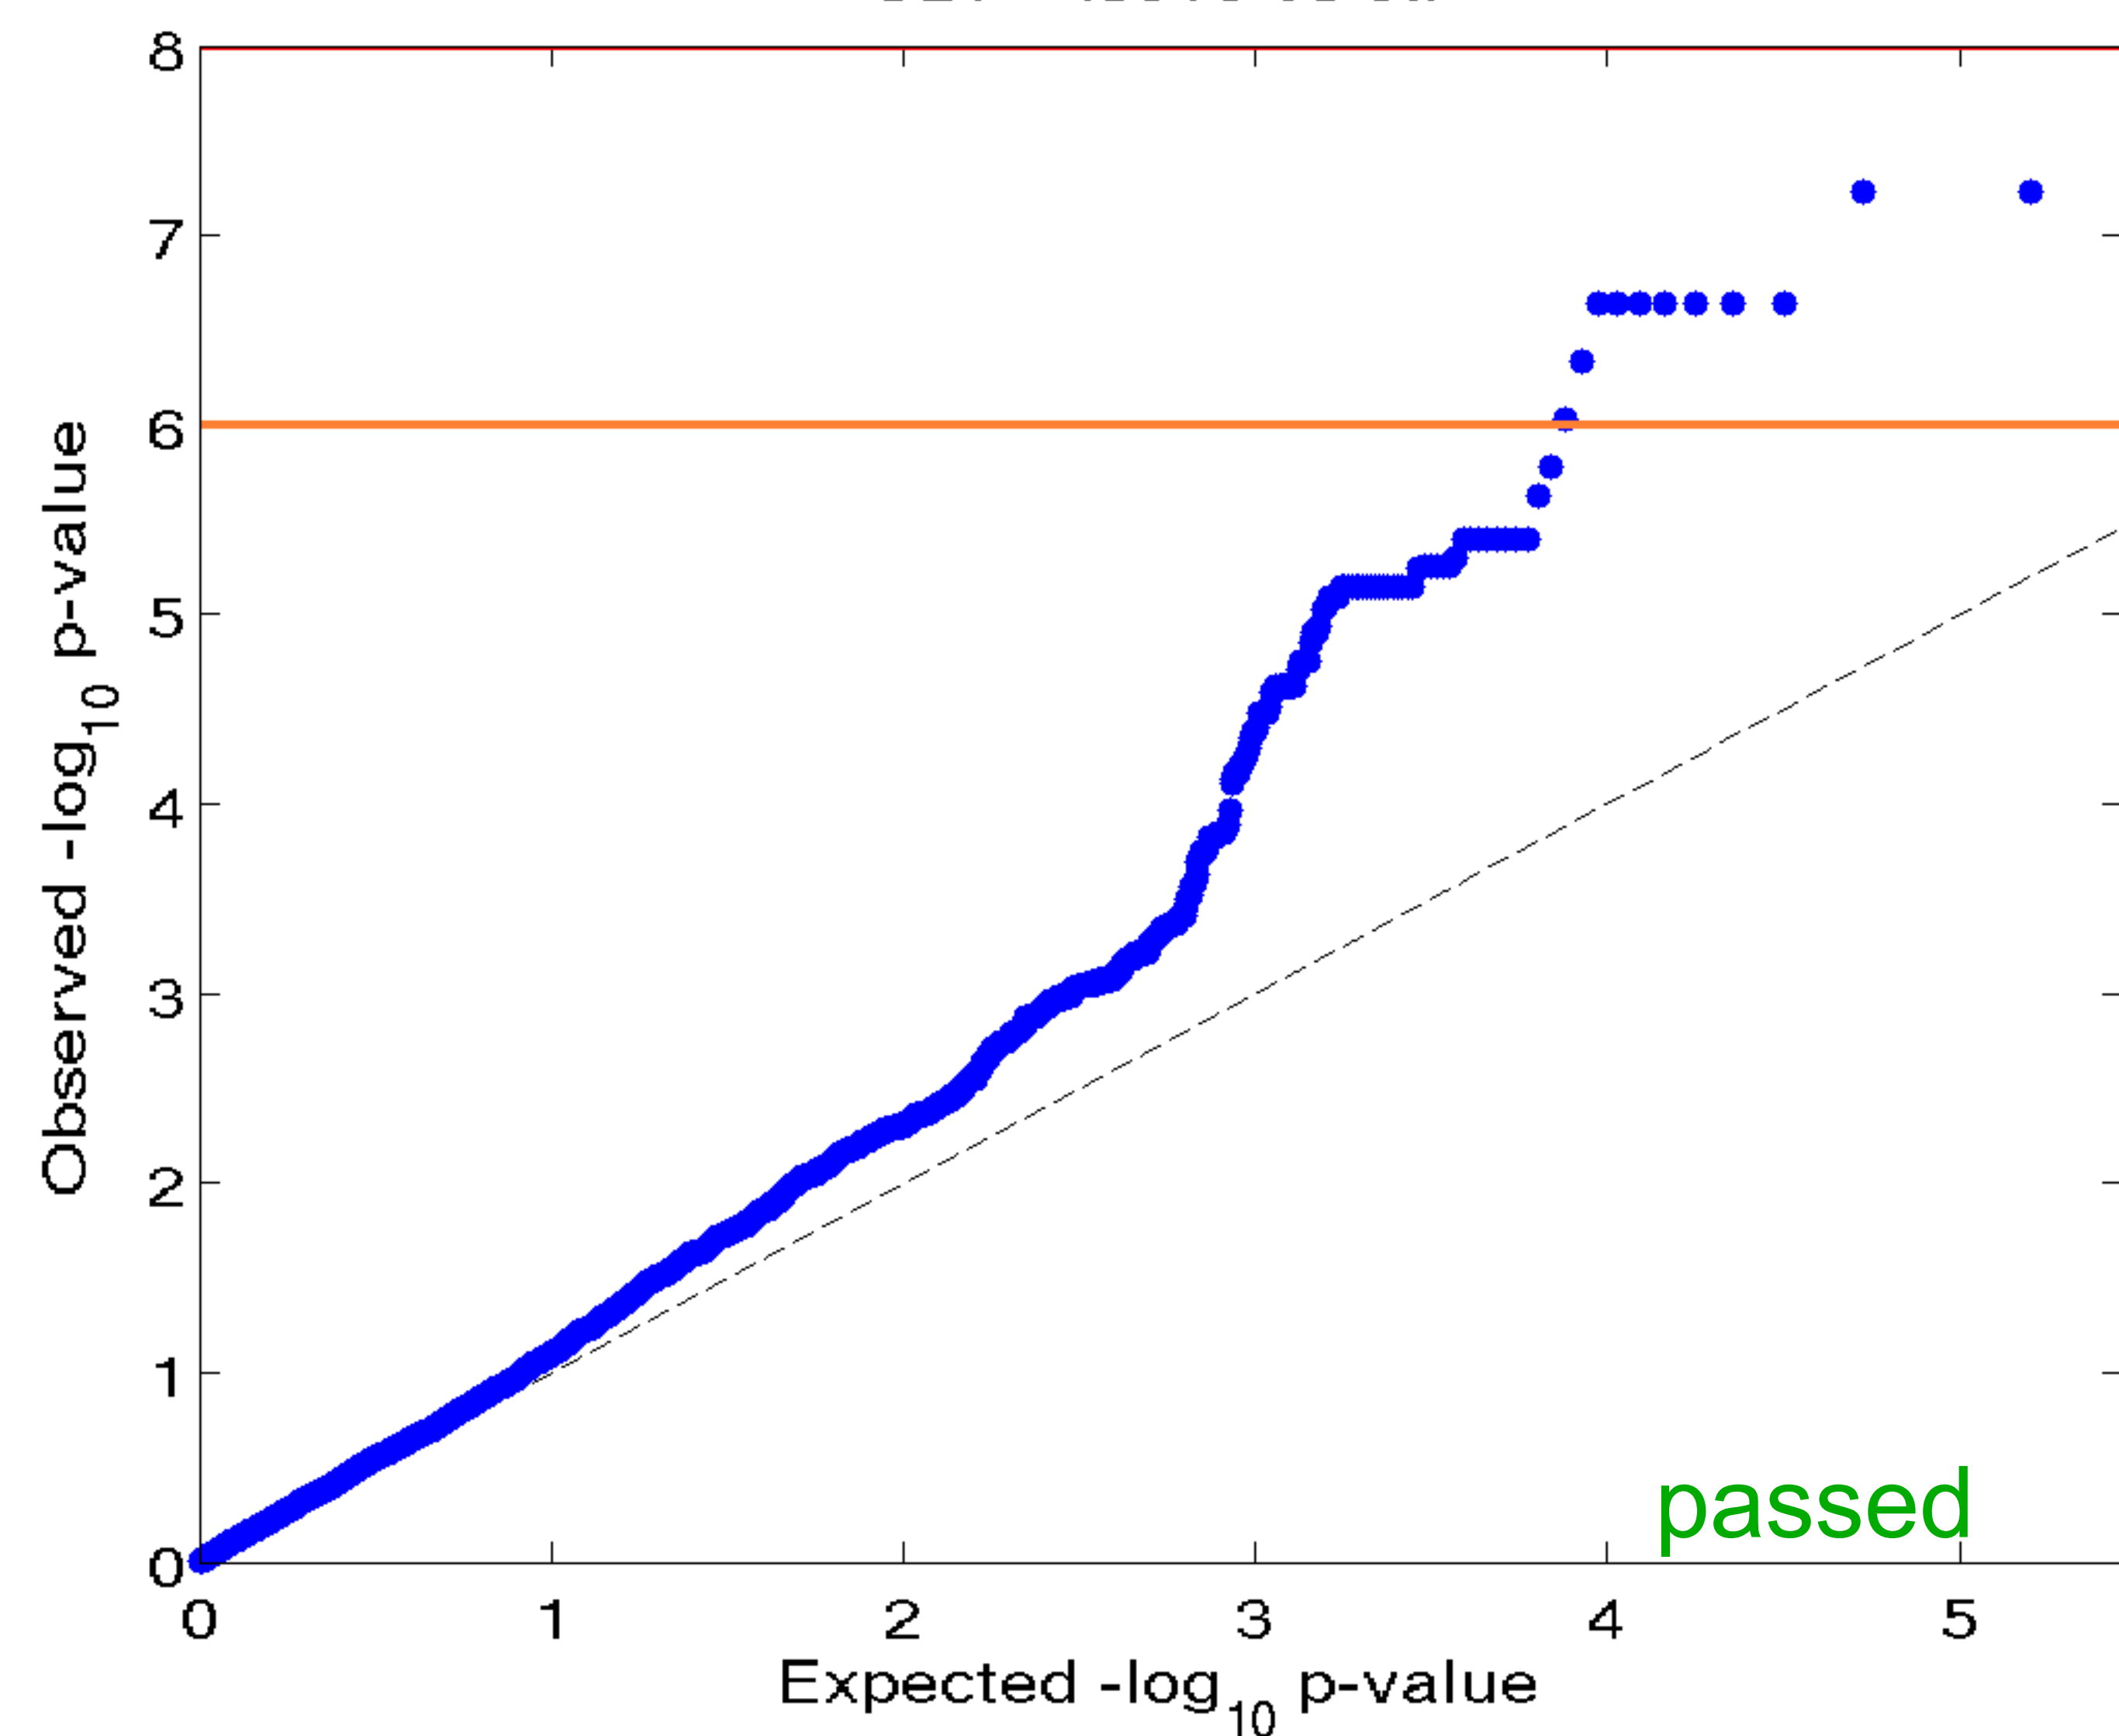



ST - iso10 vs ctr

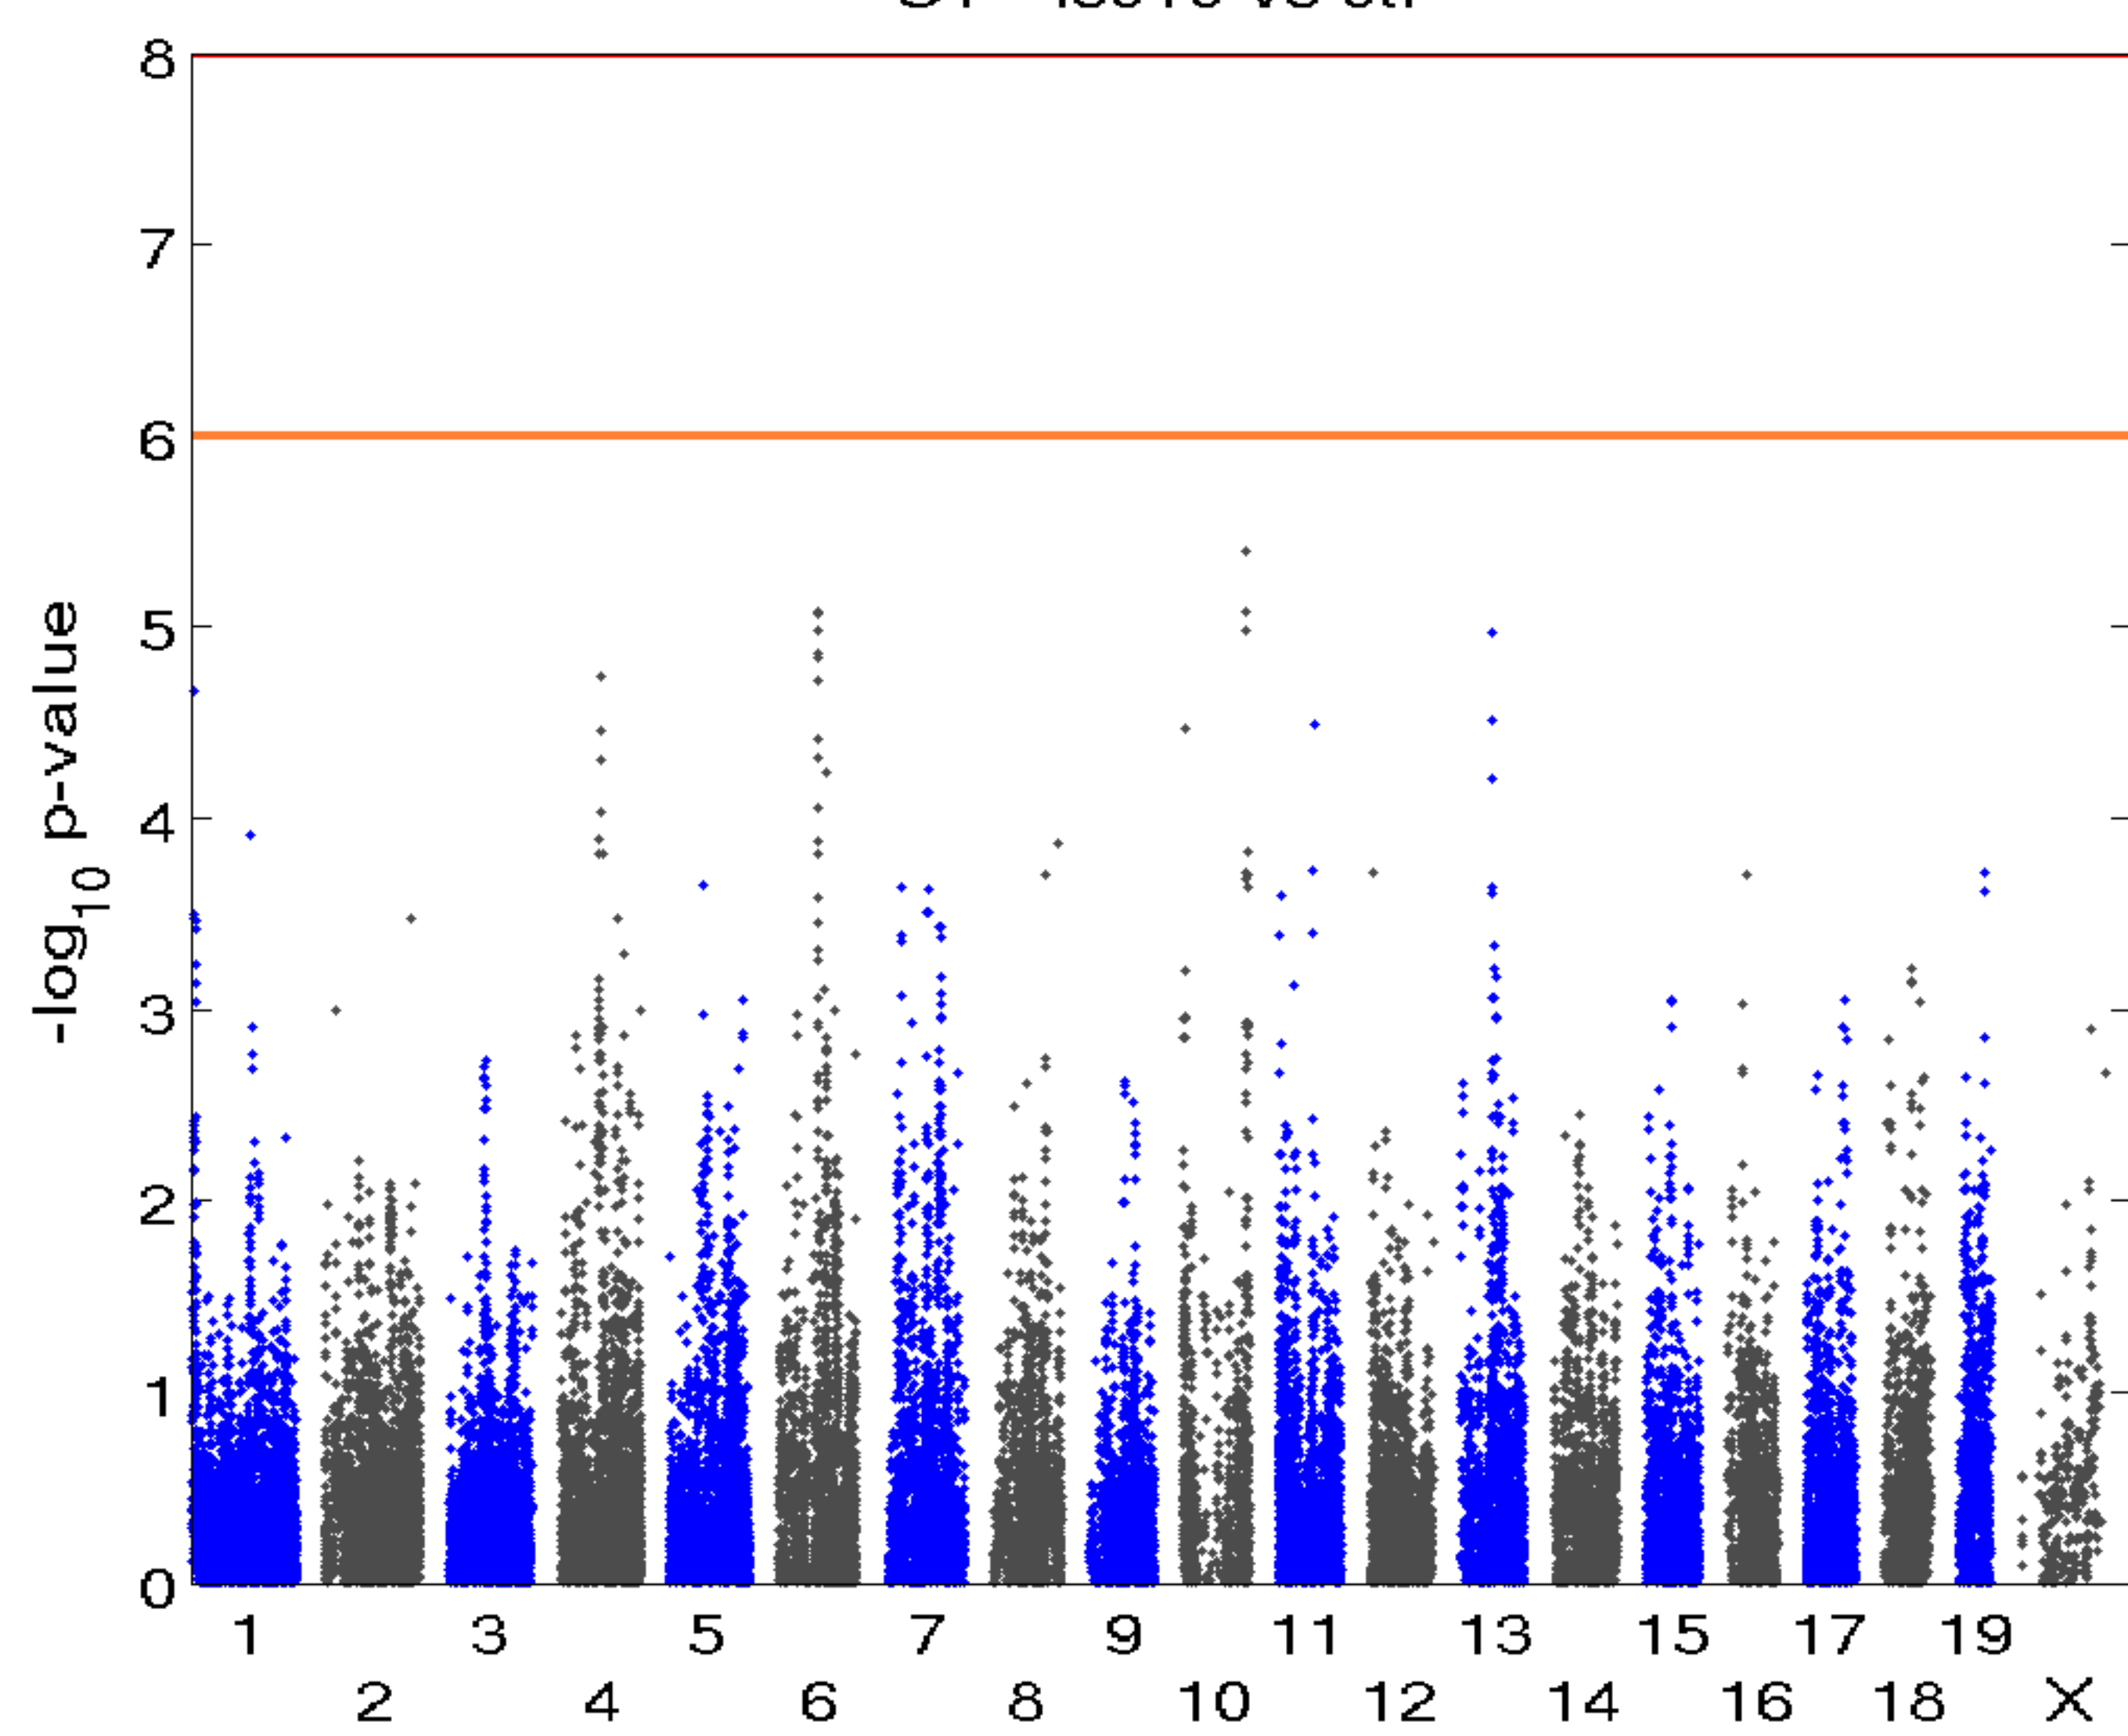

ST - iso10 vs ctr

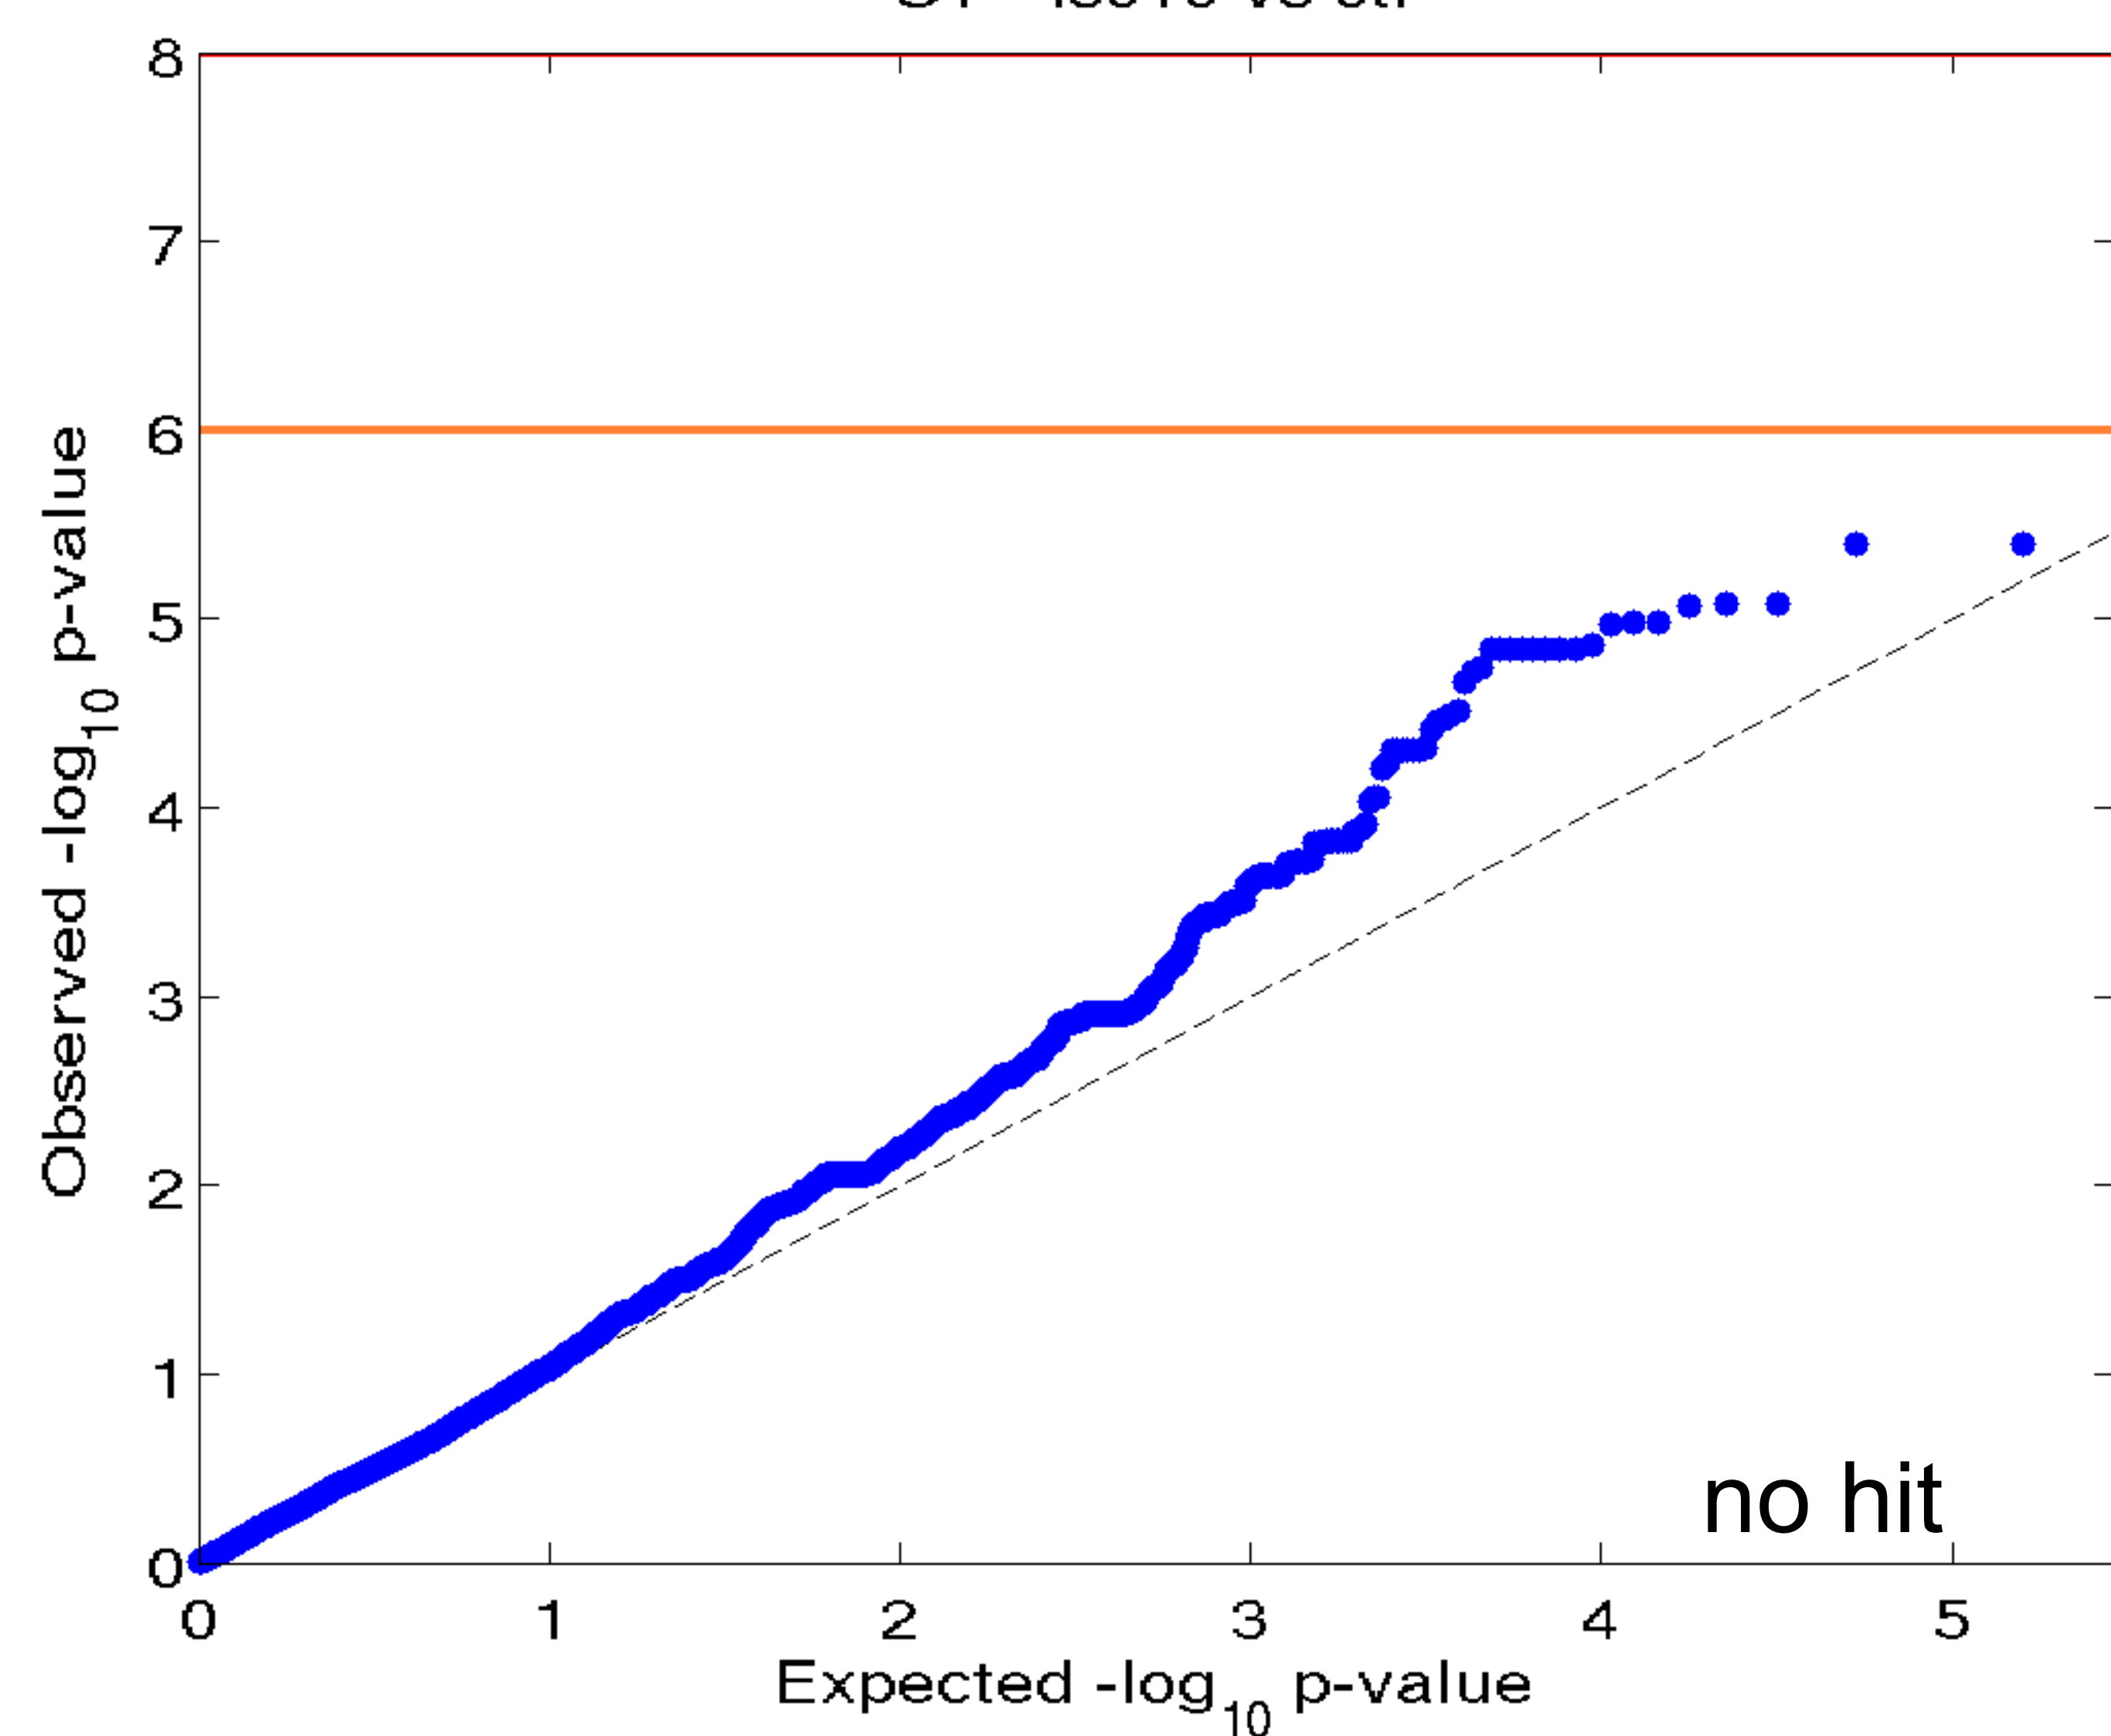

VW/AW - iso10 vs ctr

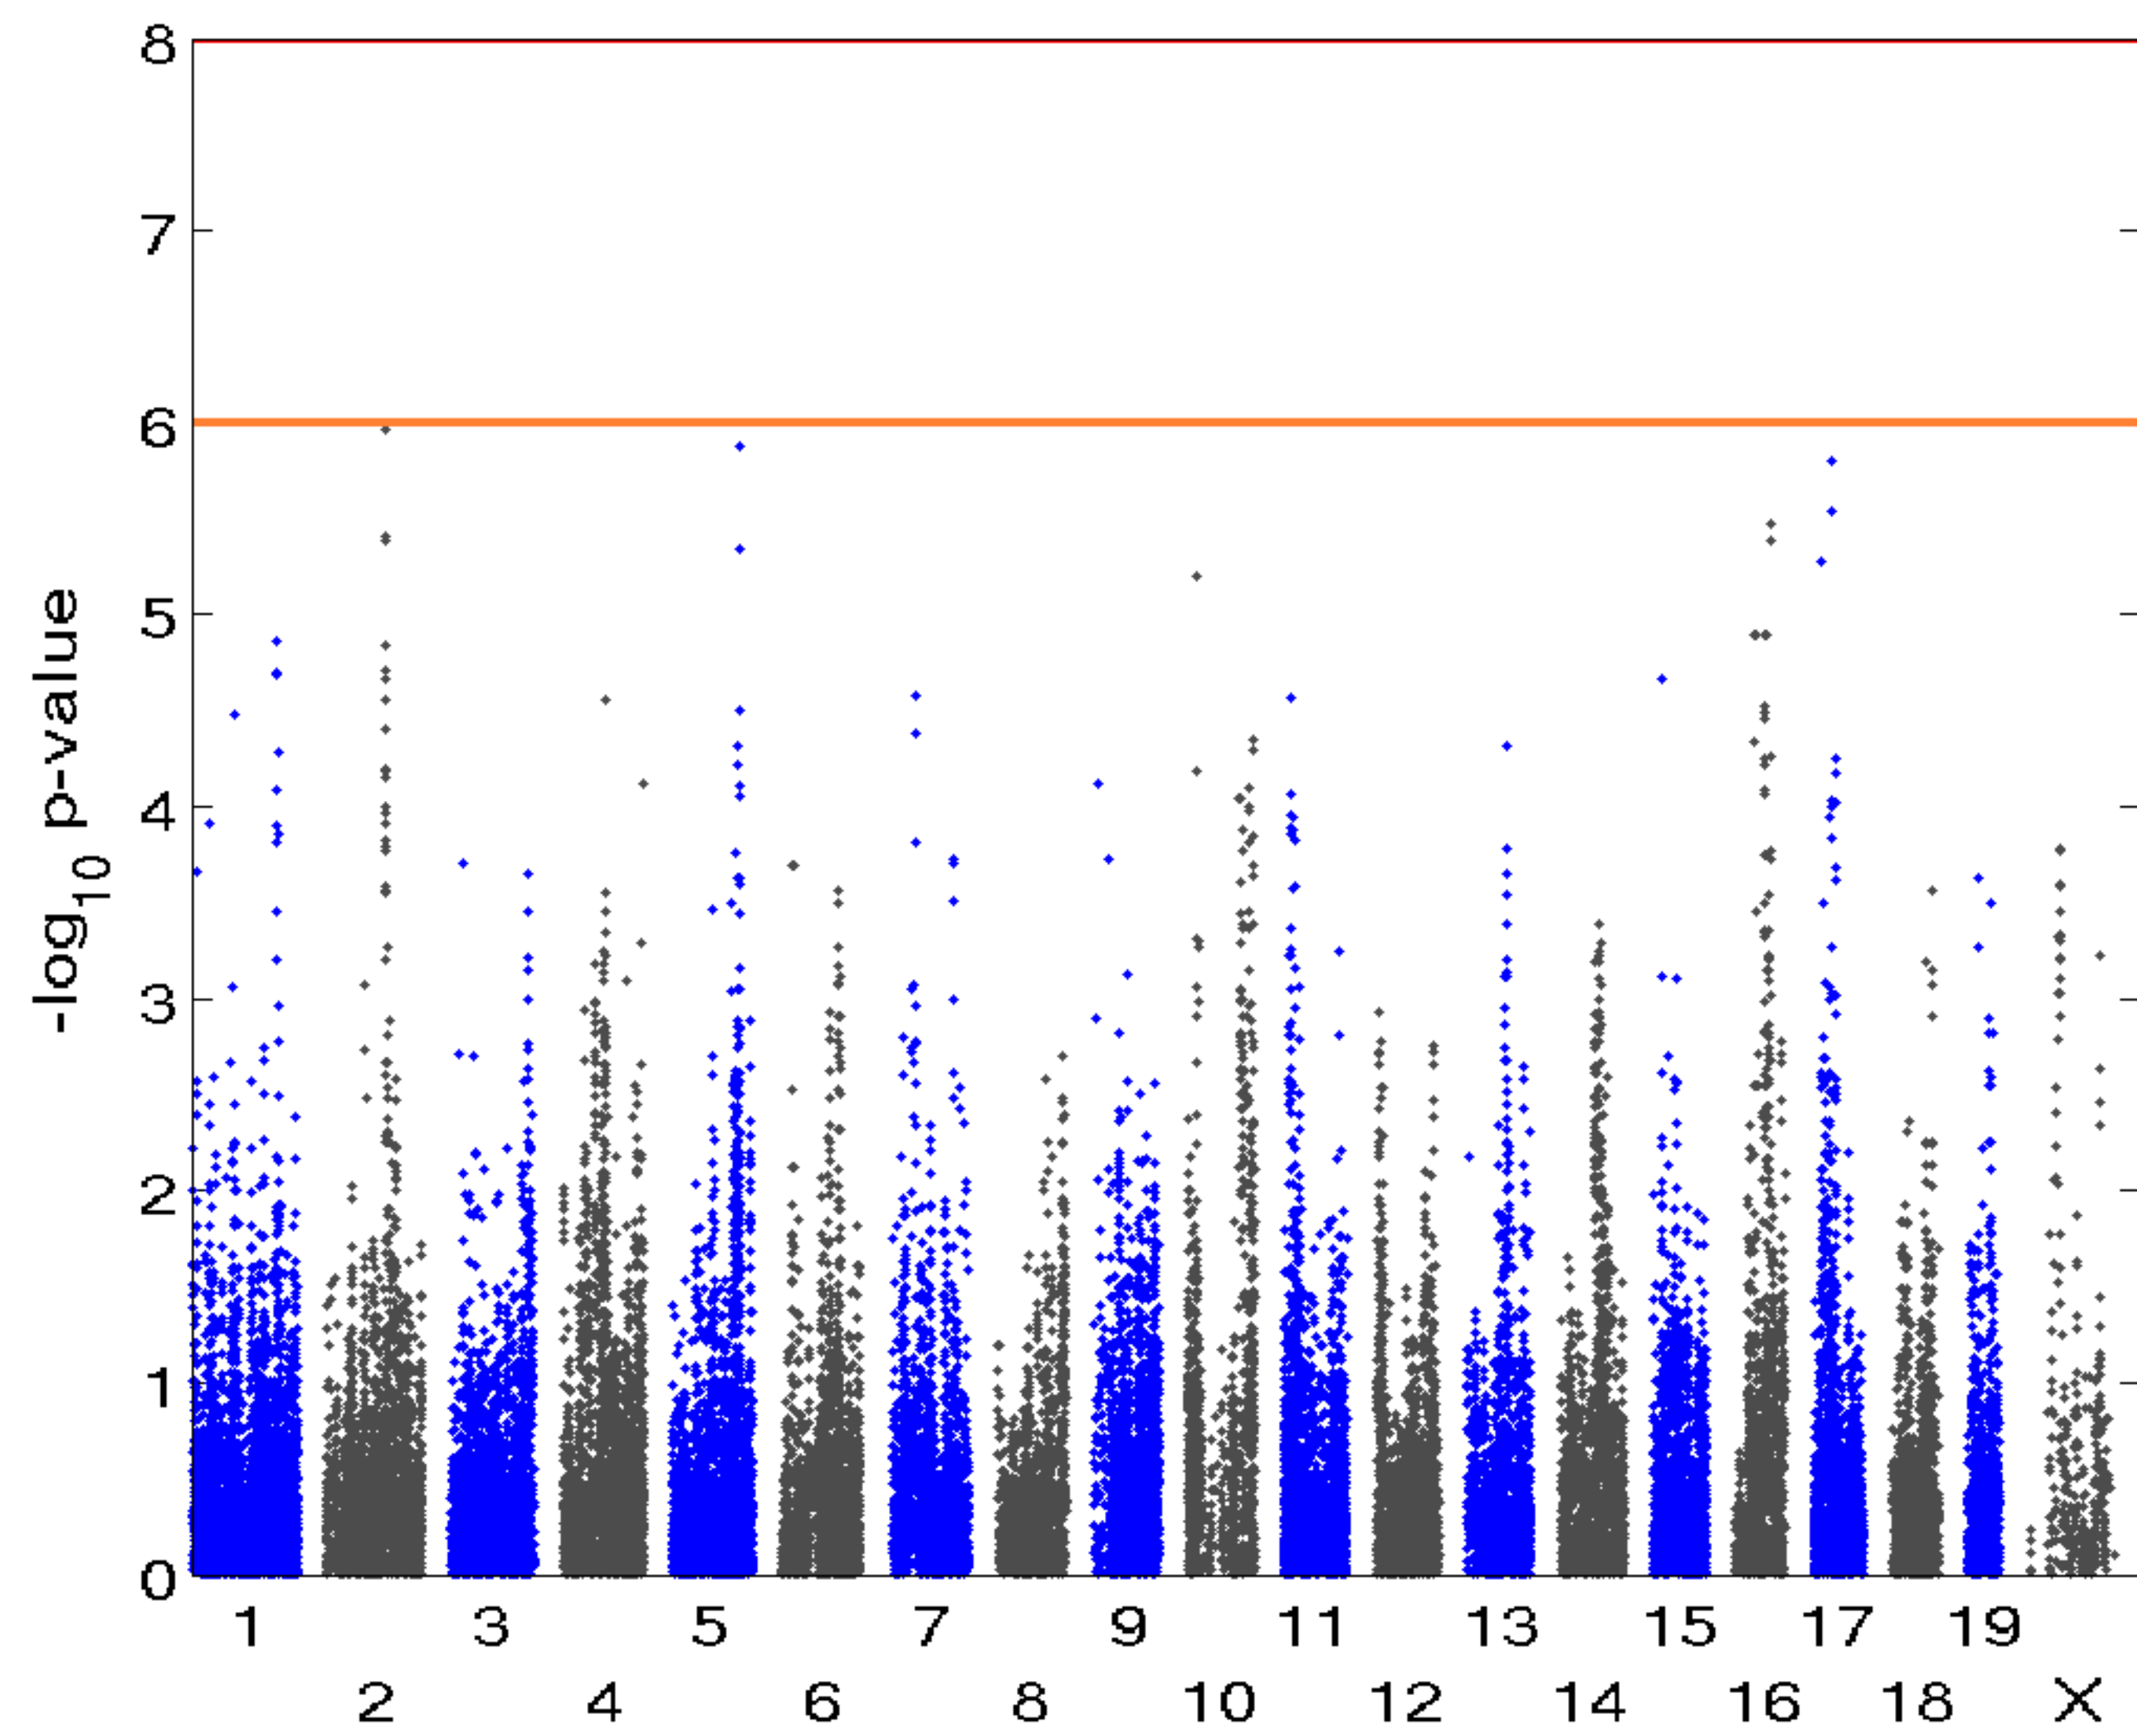

VW/AW - iso10 vs ctr

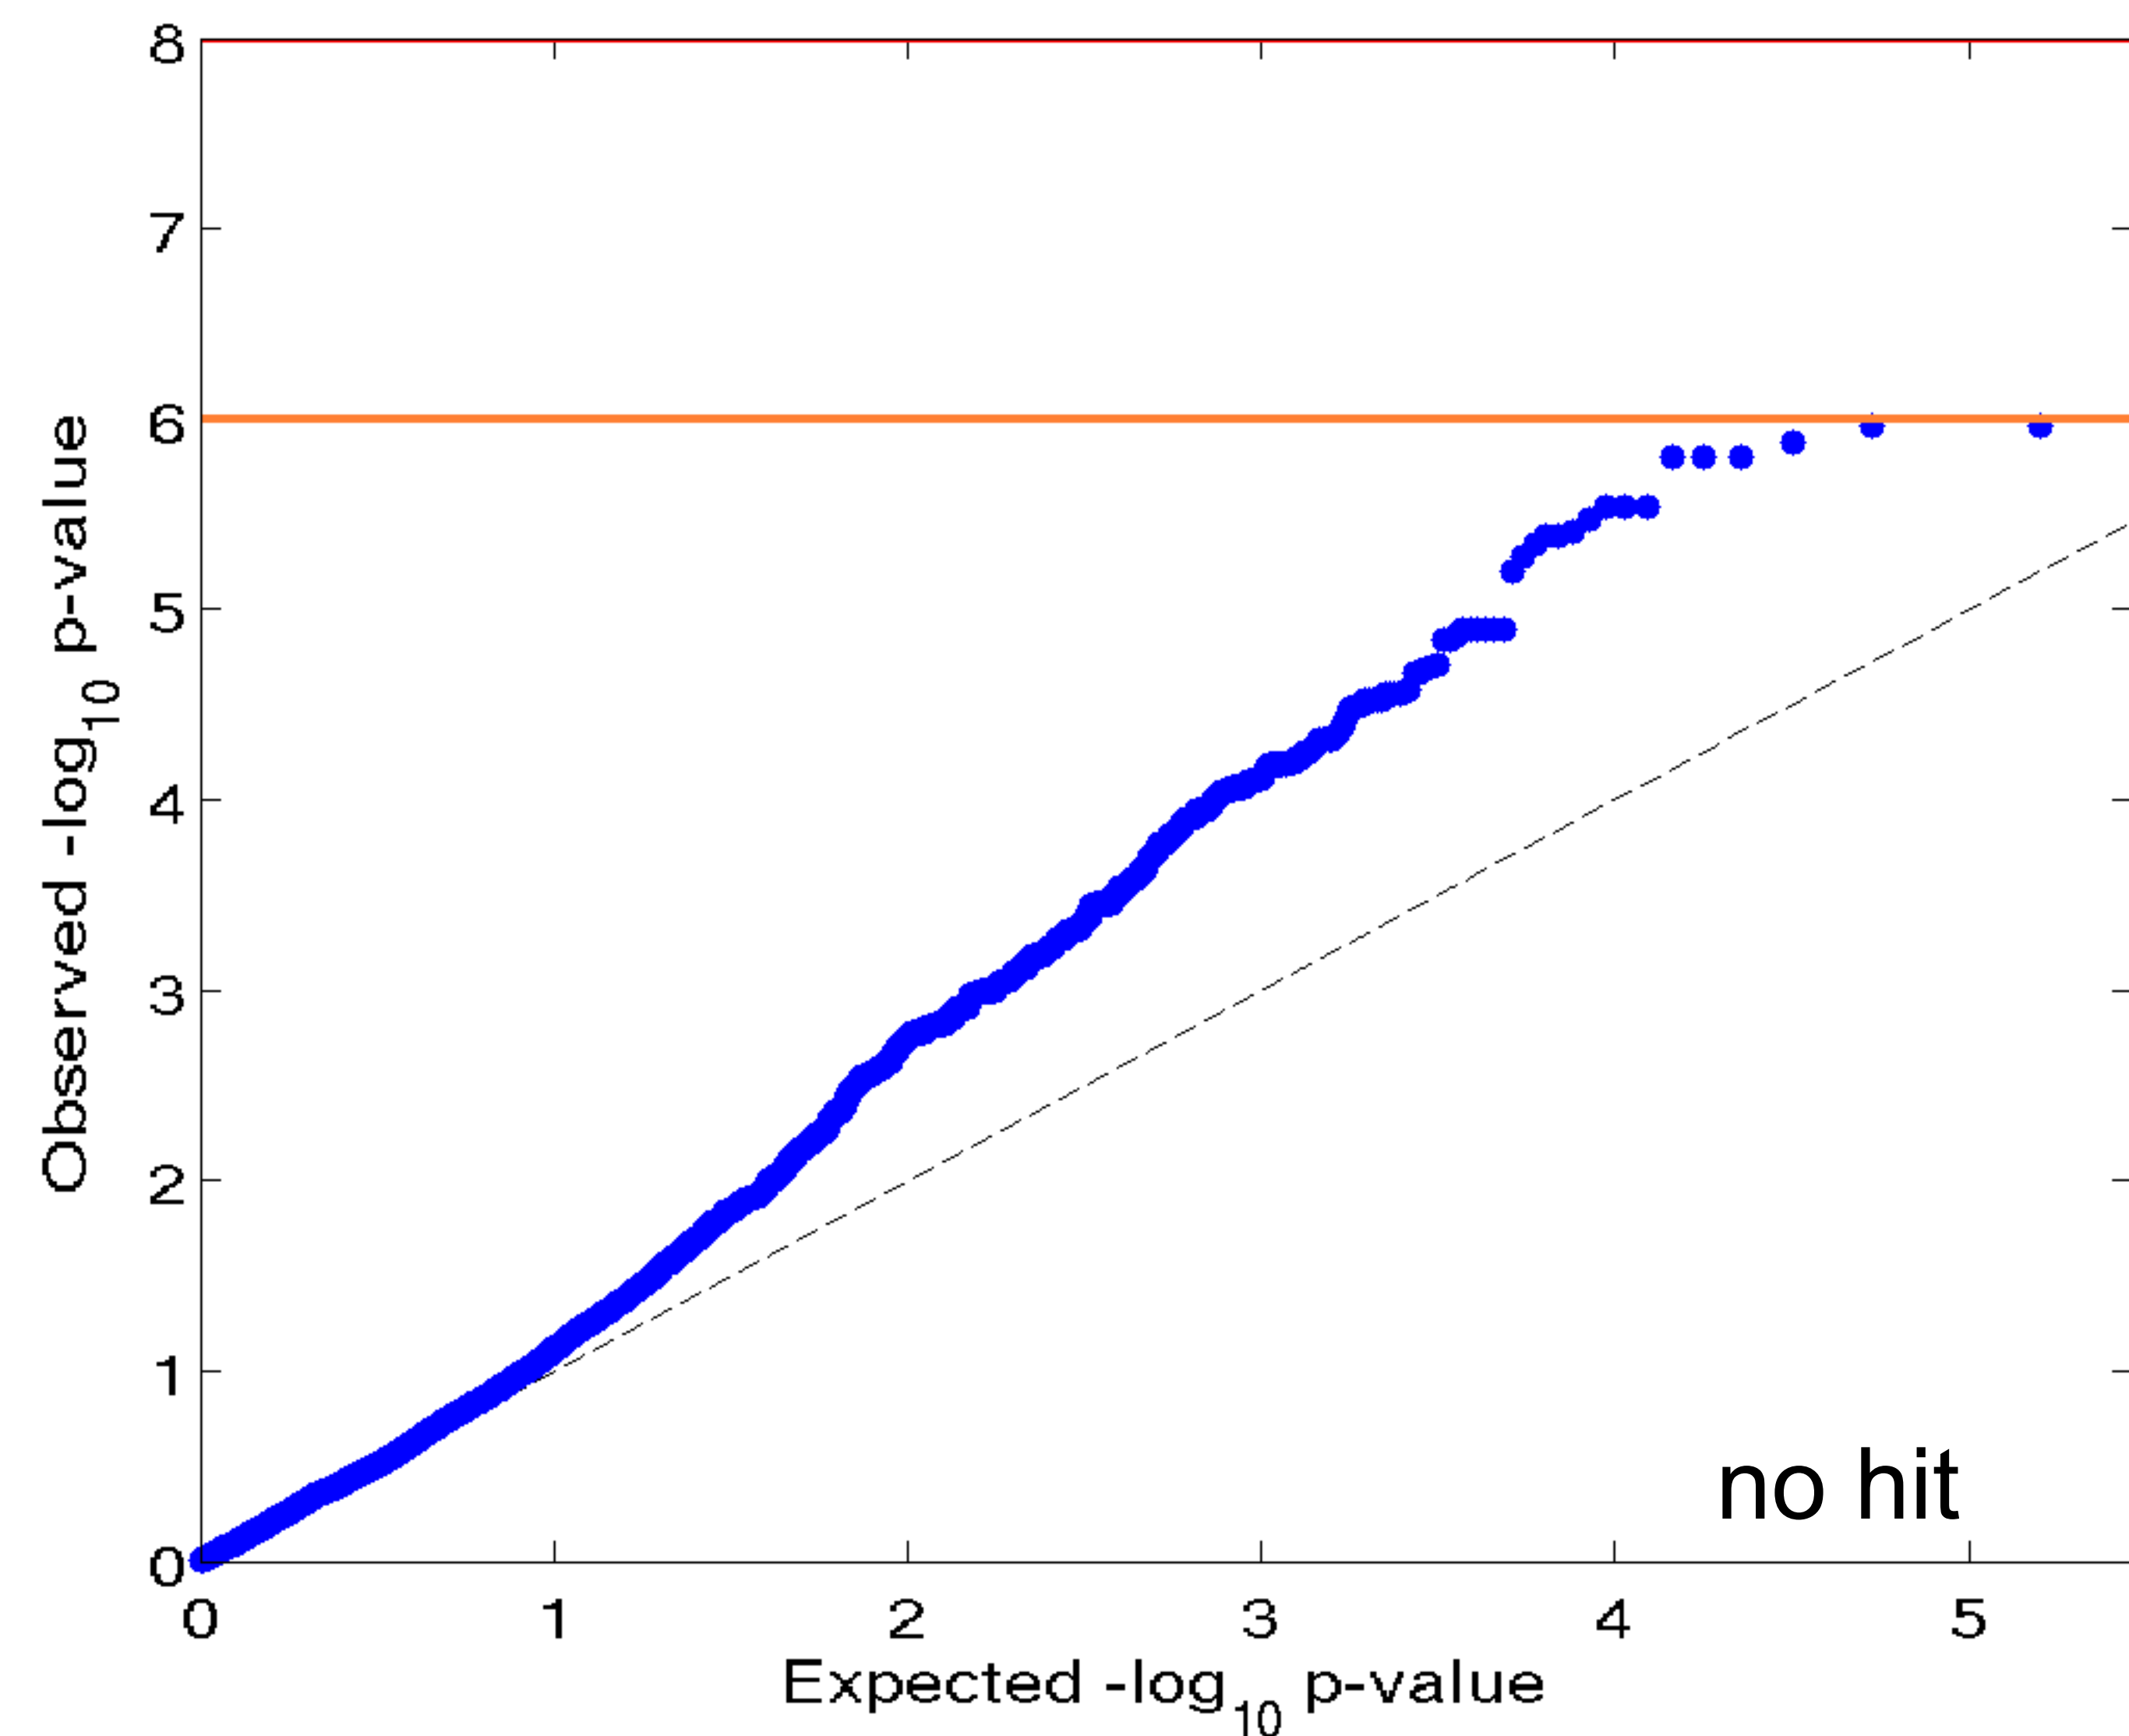

VW/BWS - iso10 vs ctr

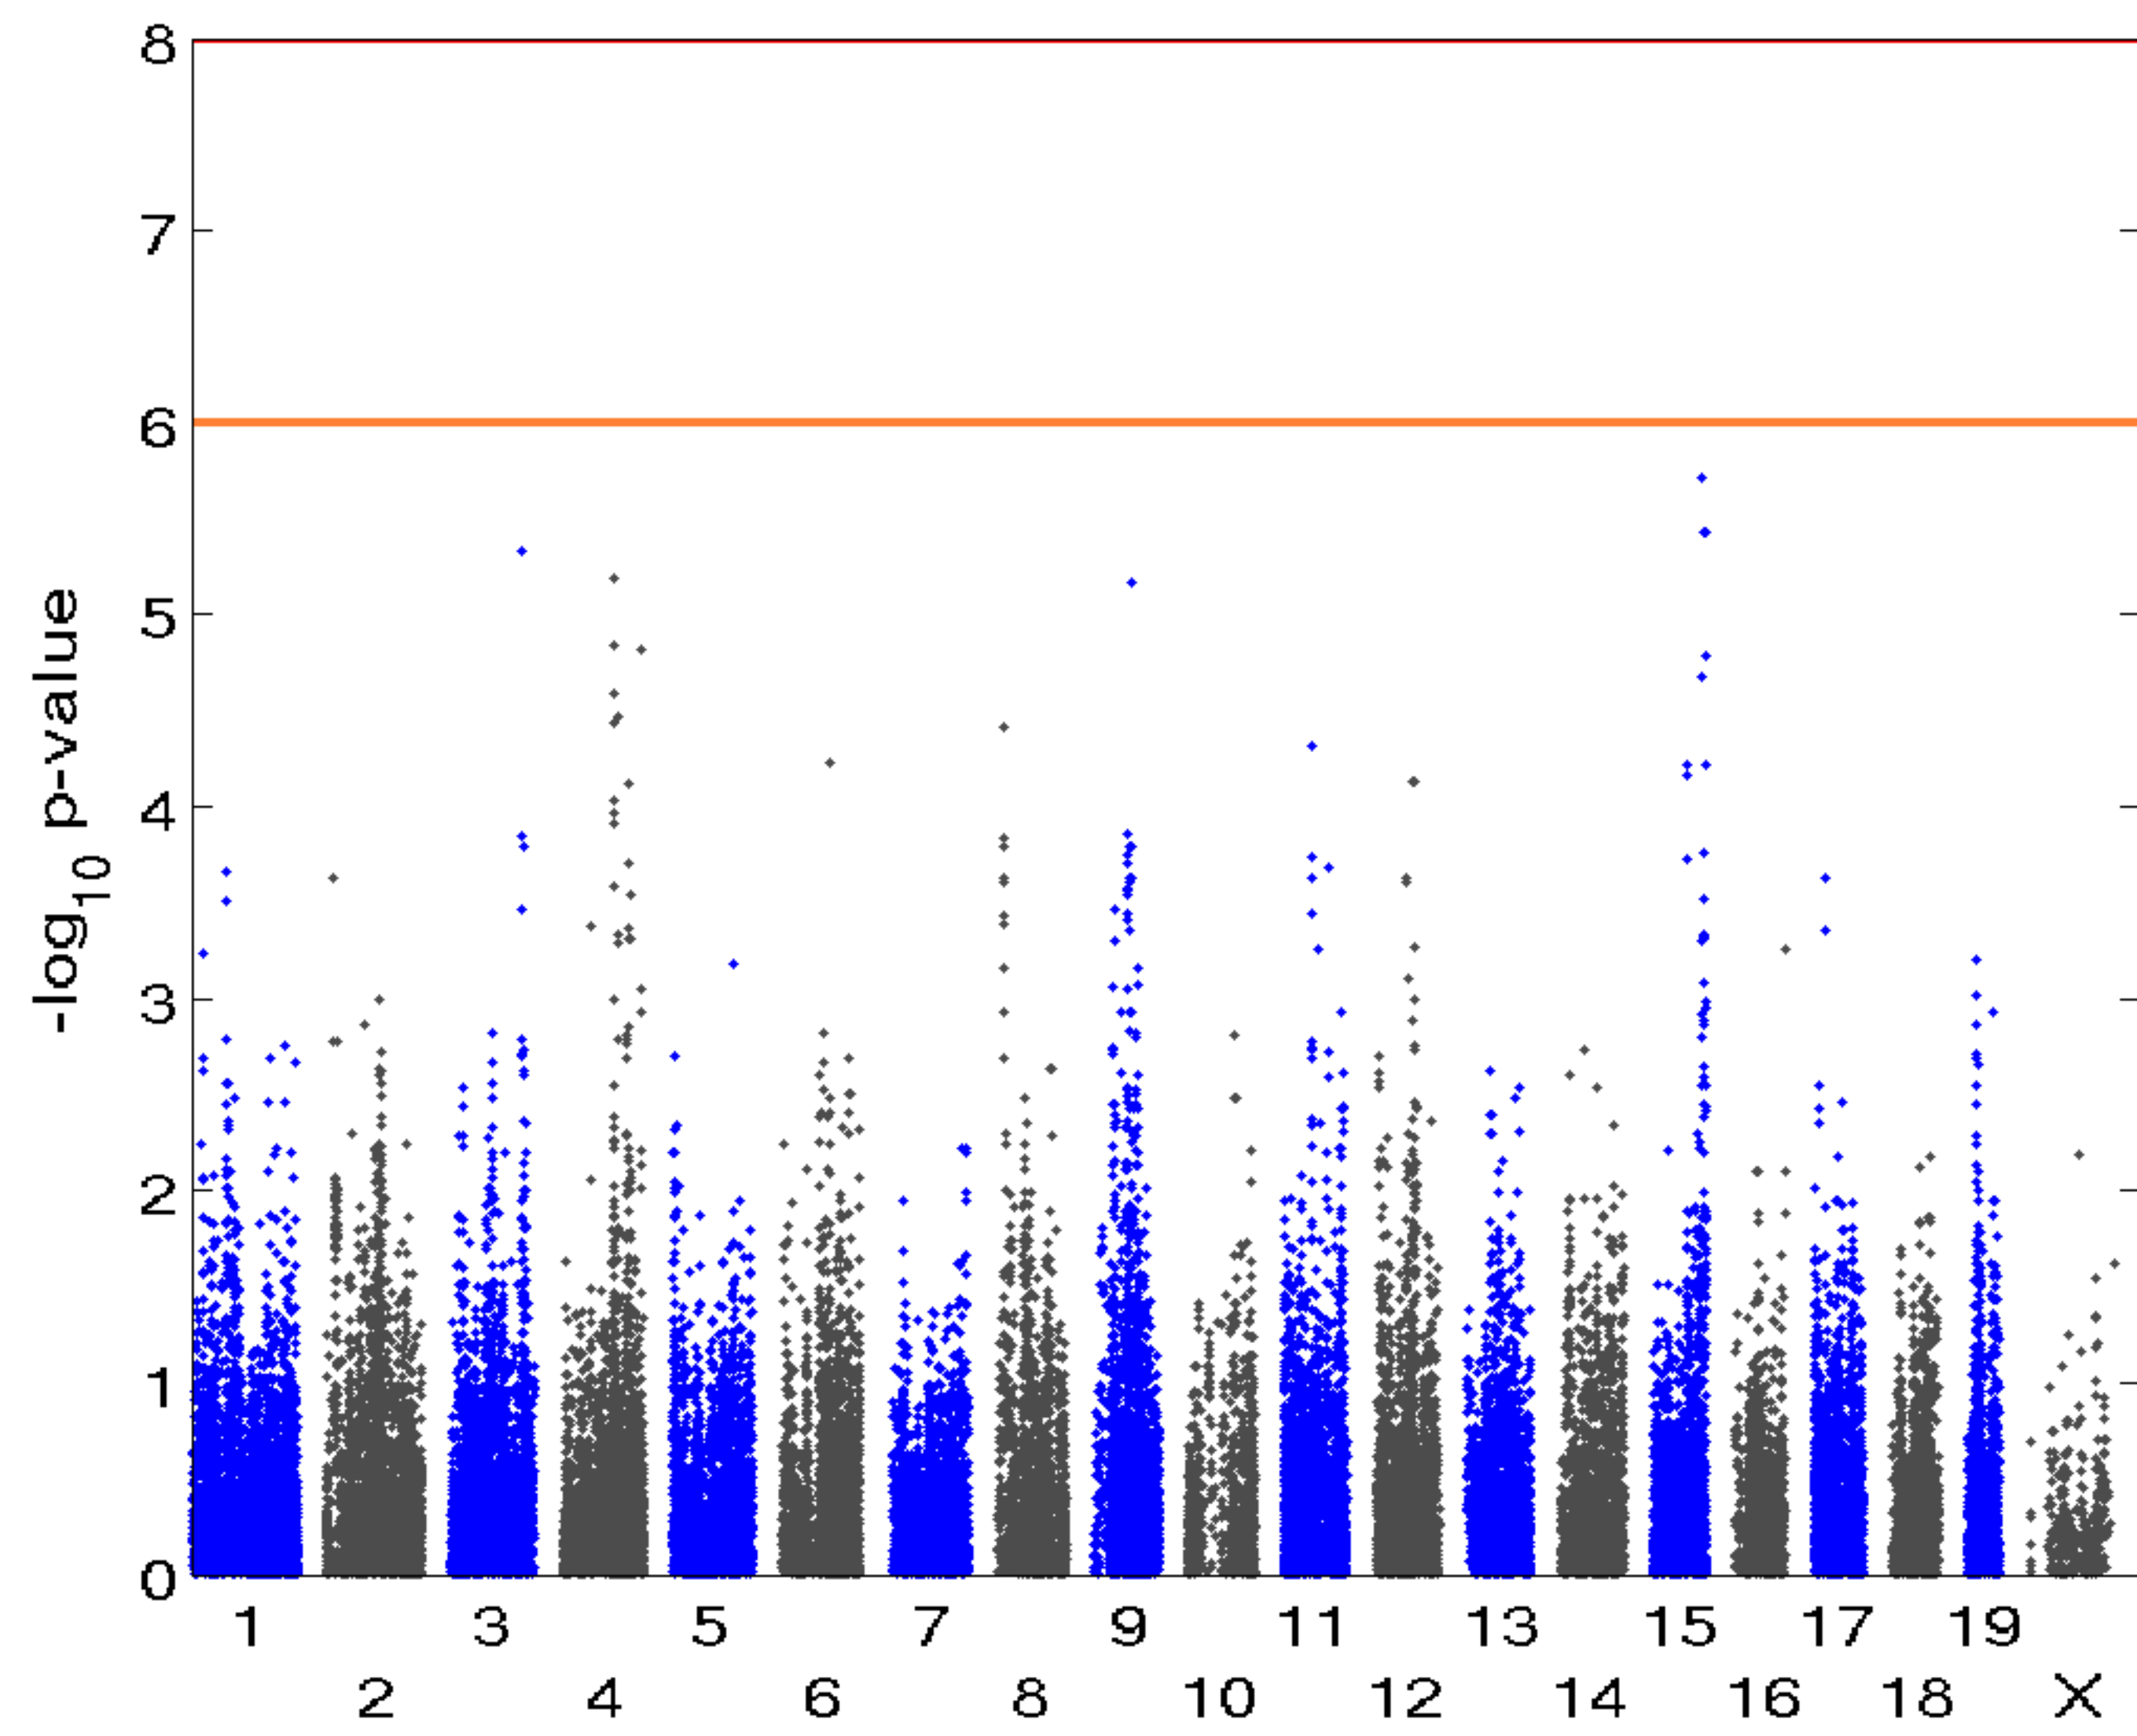

VW/BWS - iso10 vs ctr

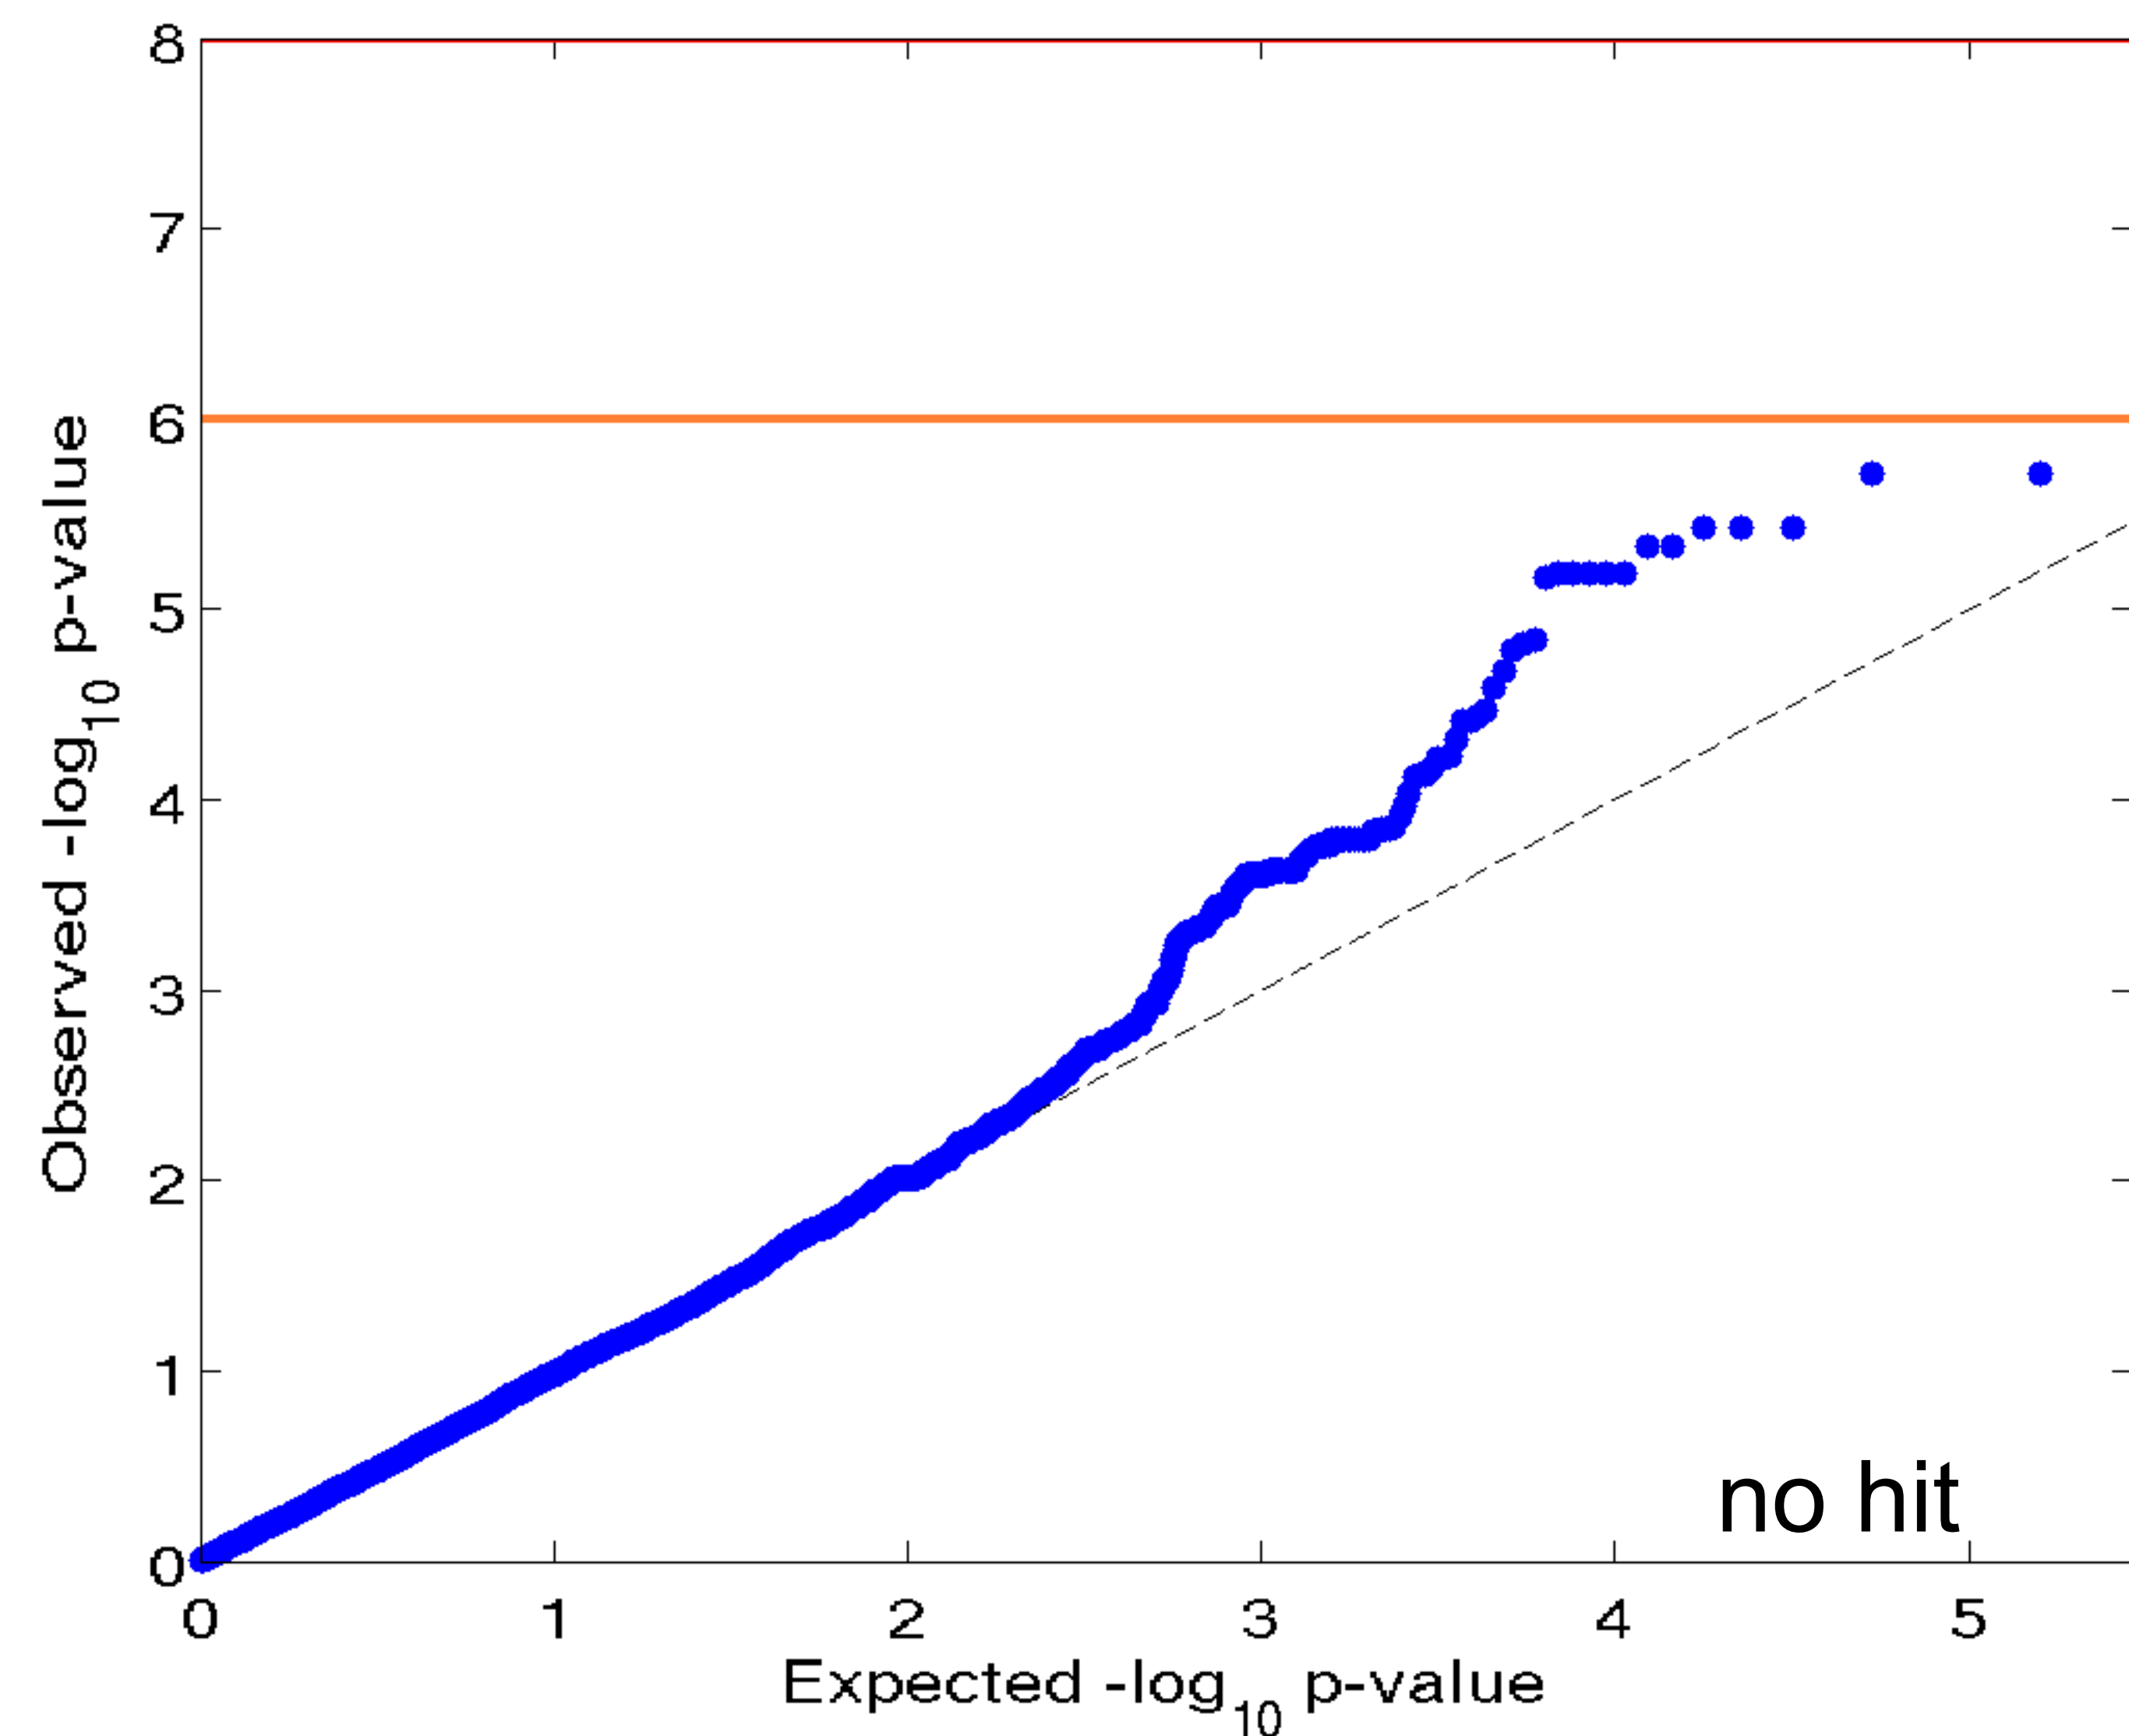

VWI - iso10 vs ctr

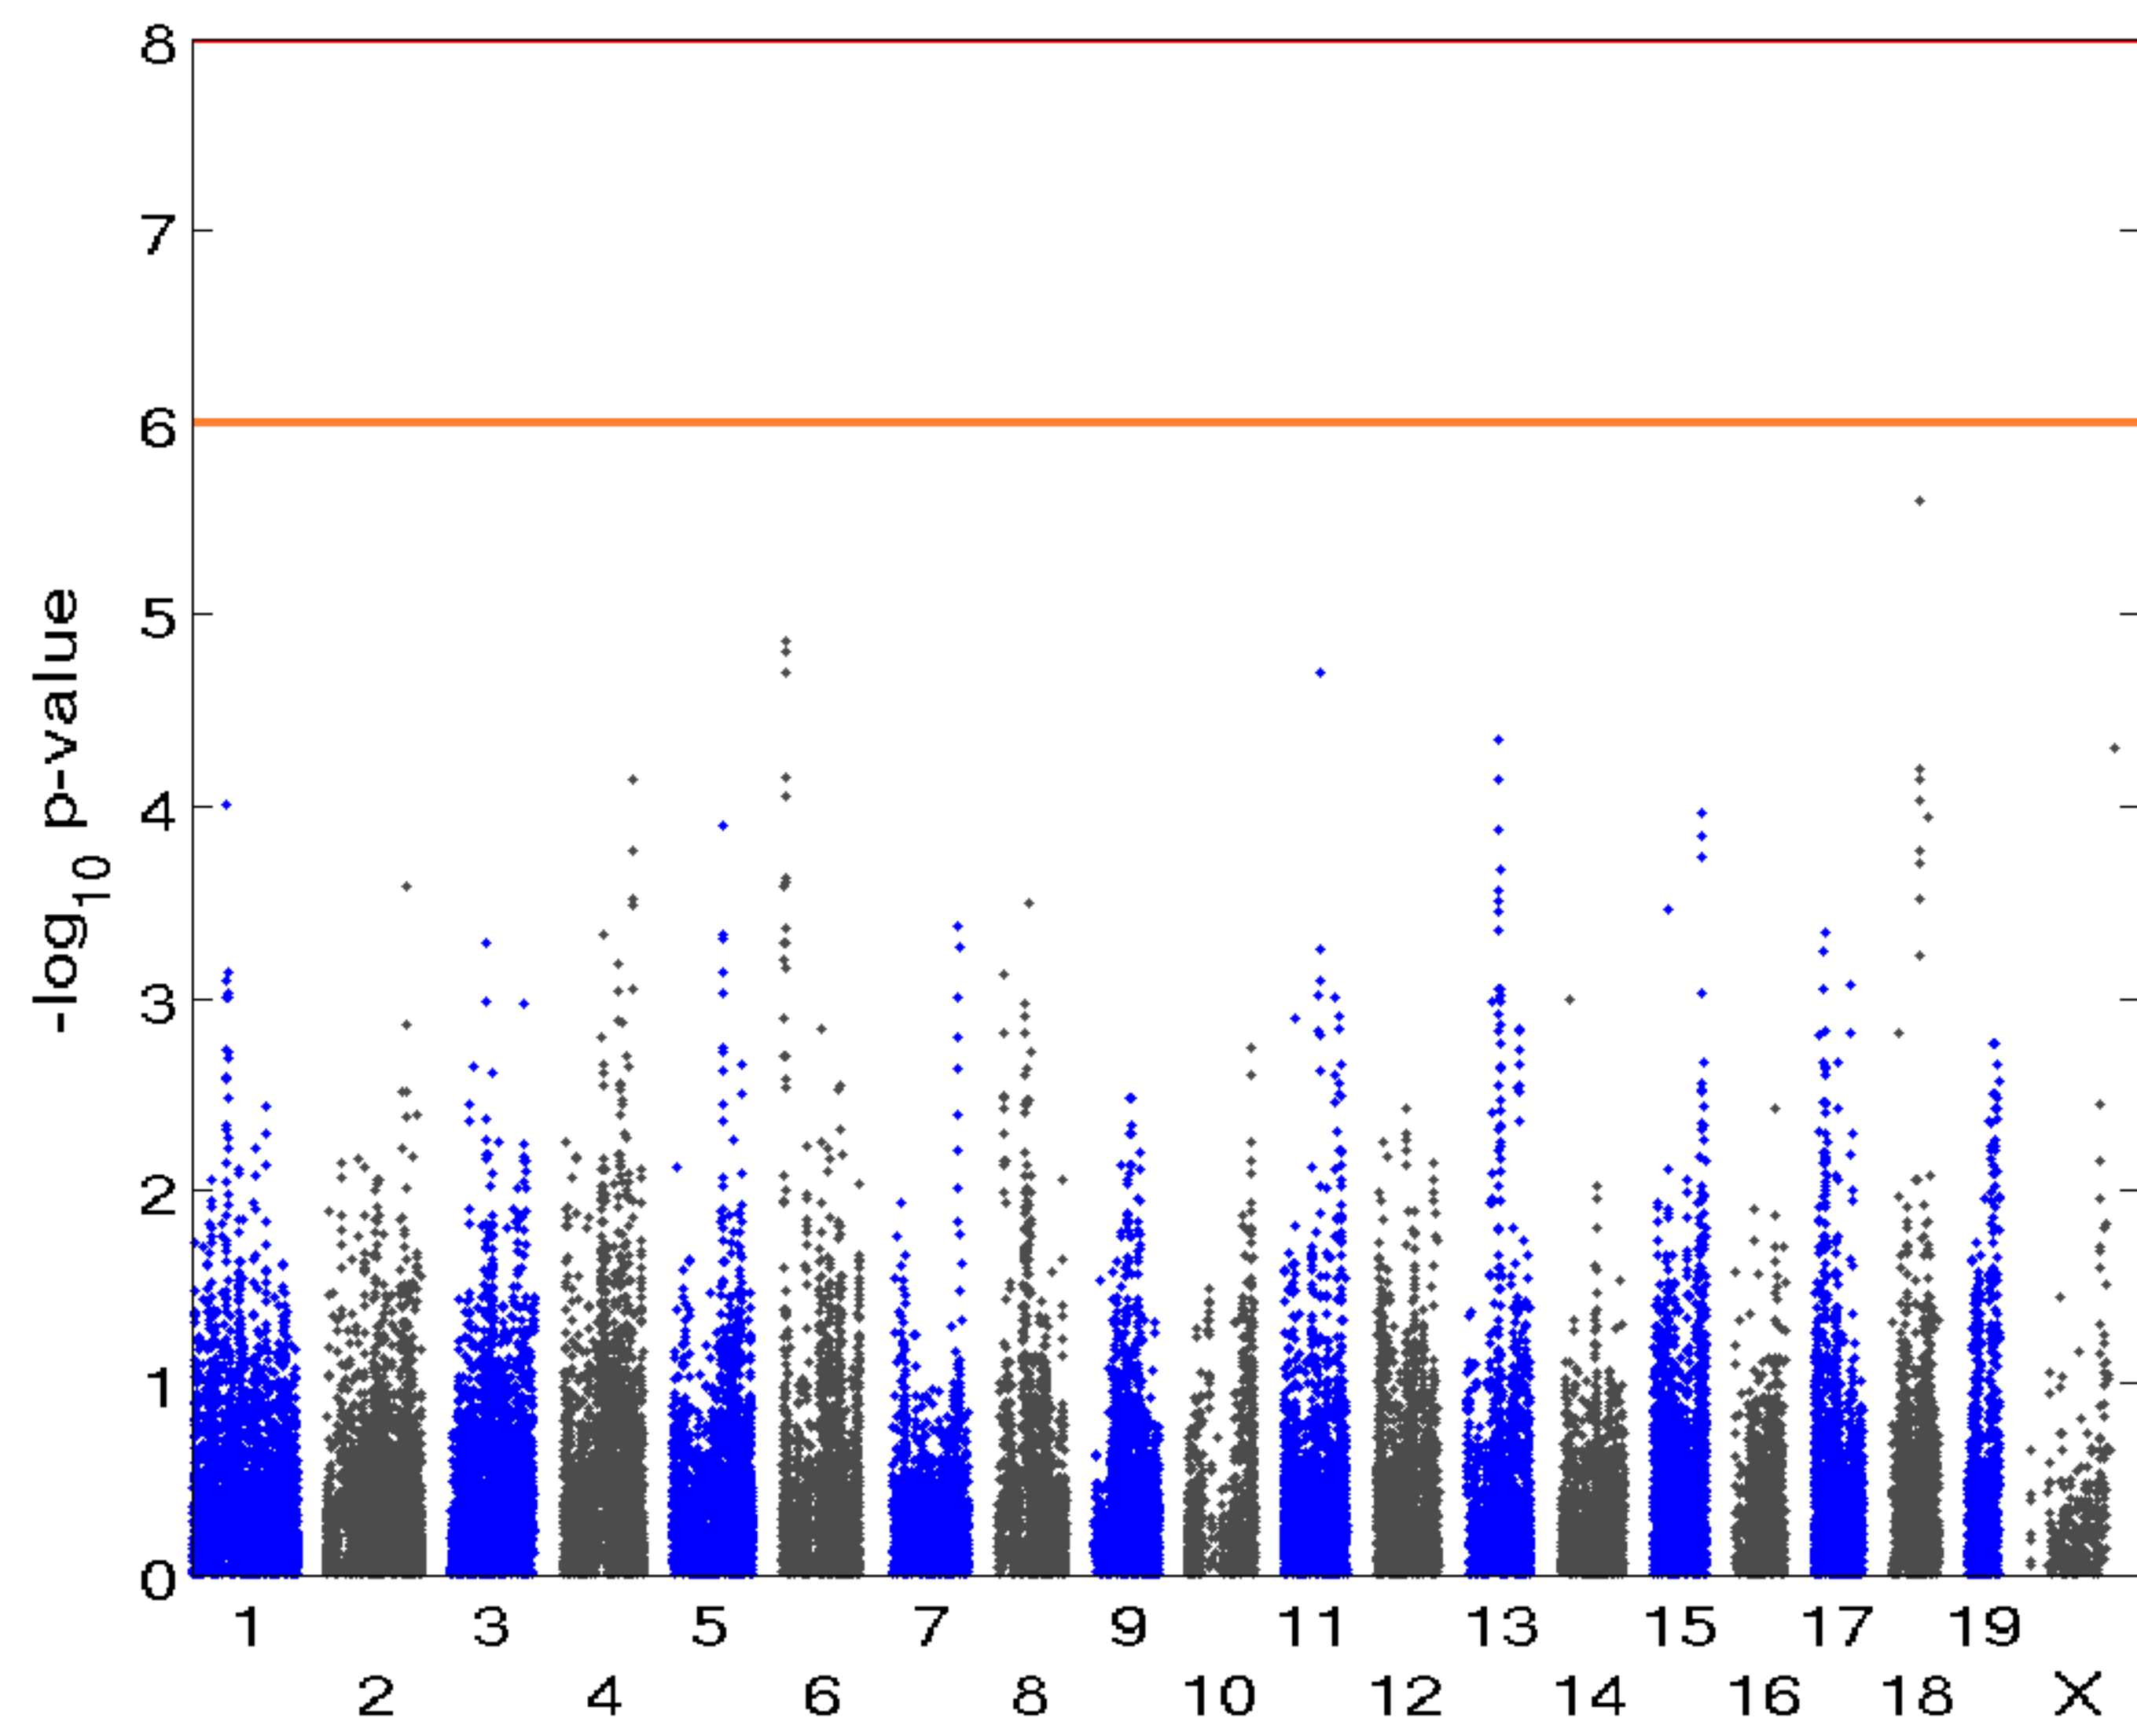

VWI - iso10 vs ctr

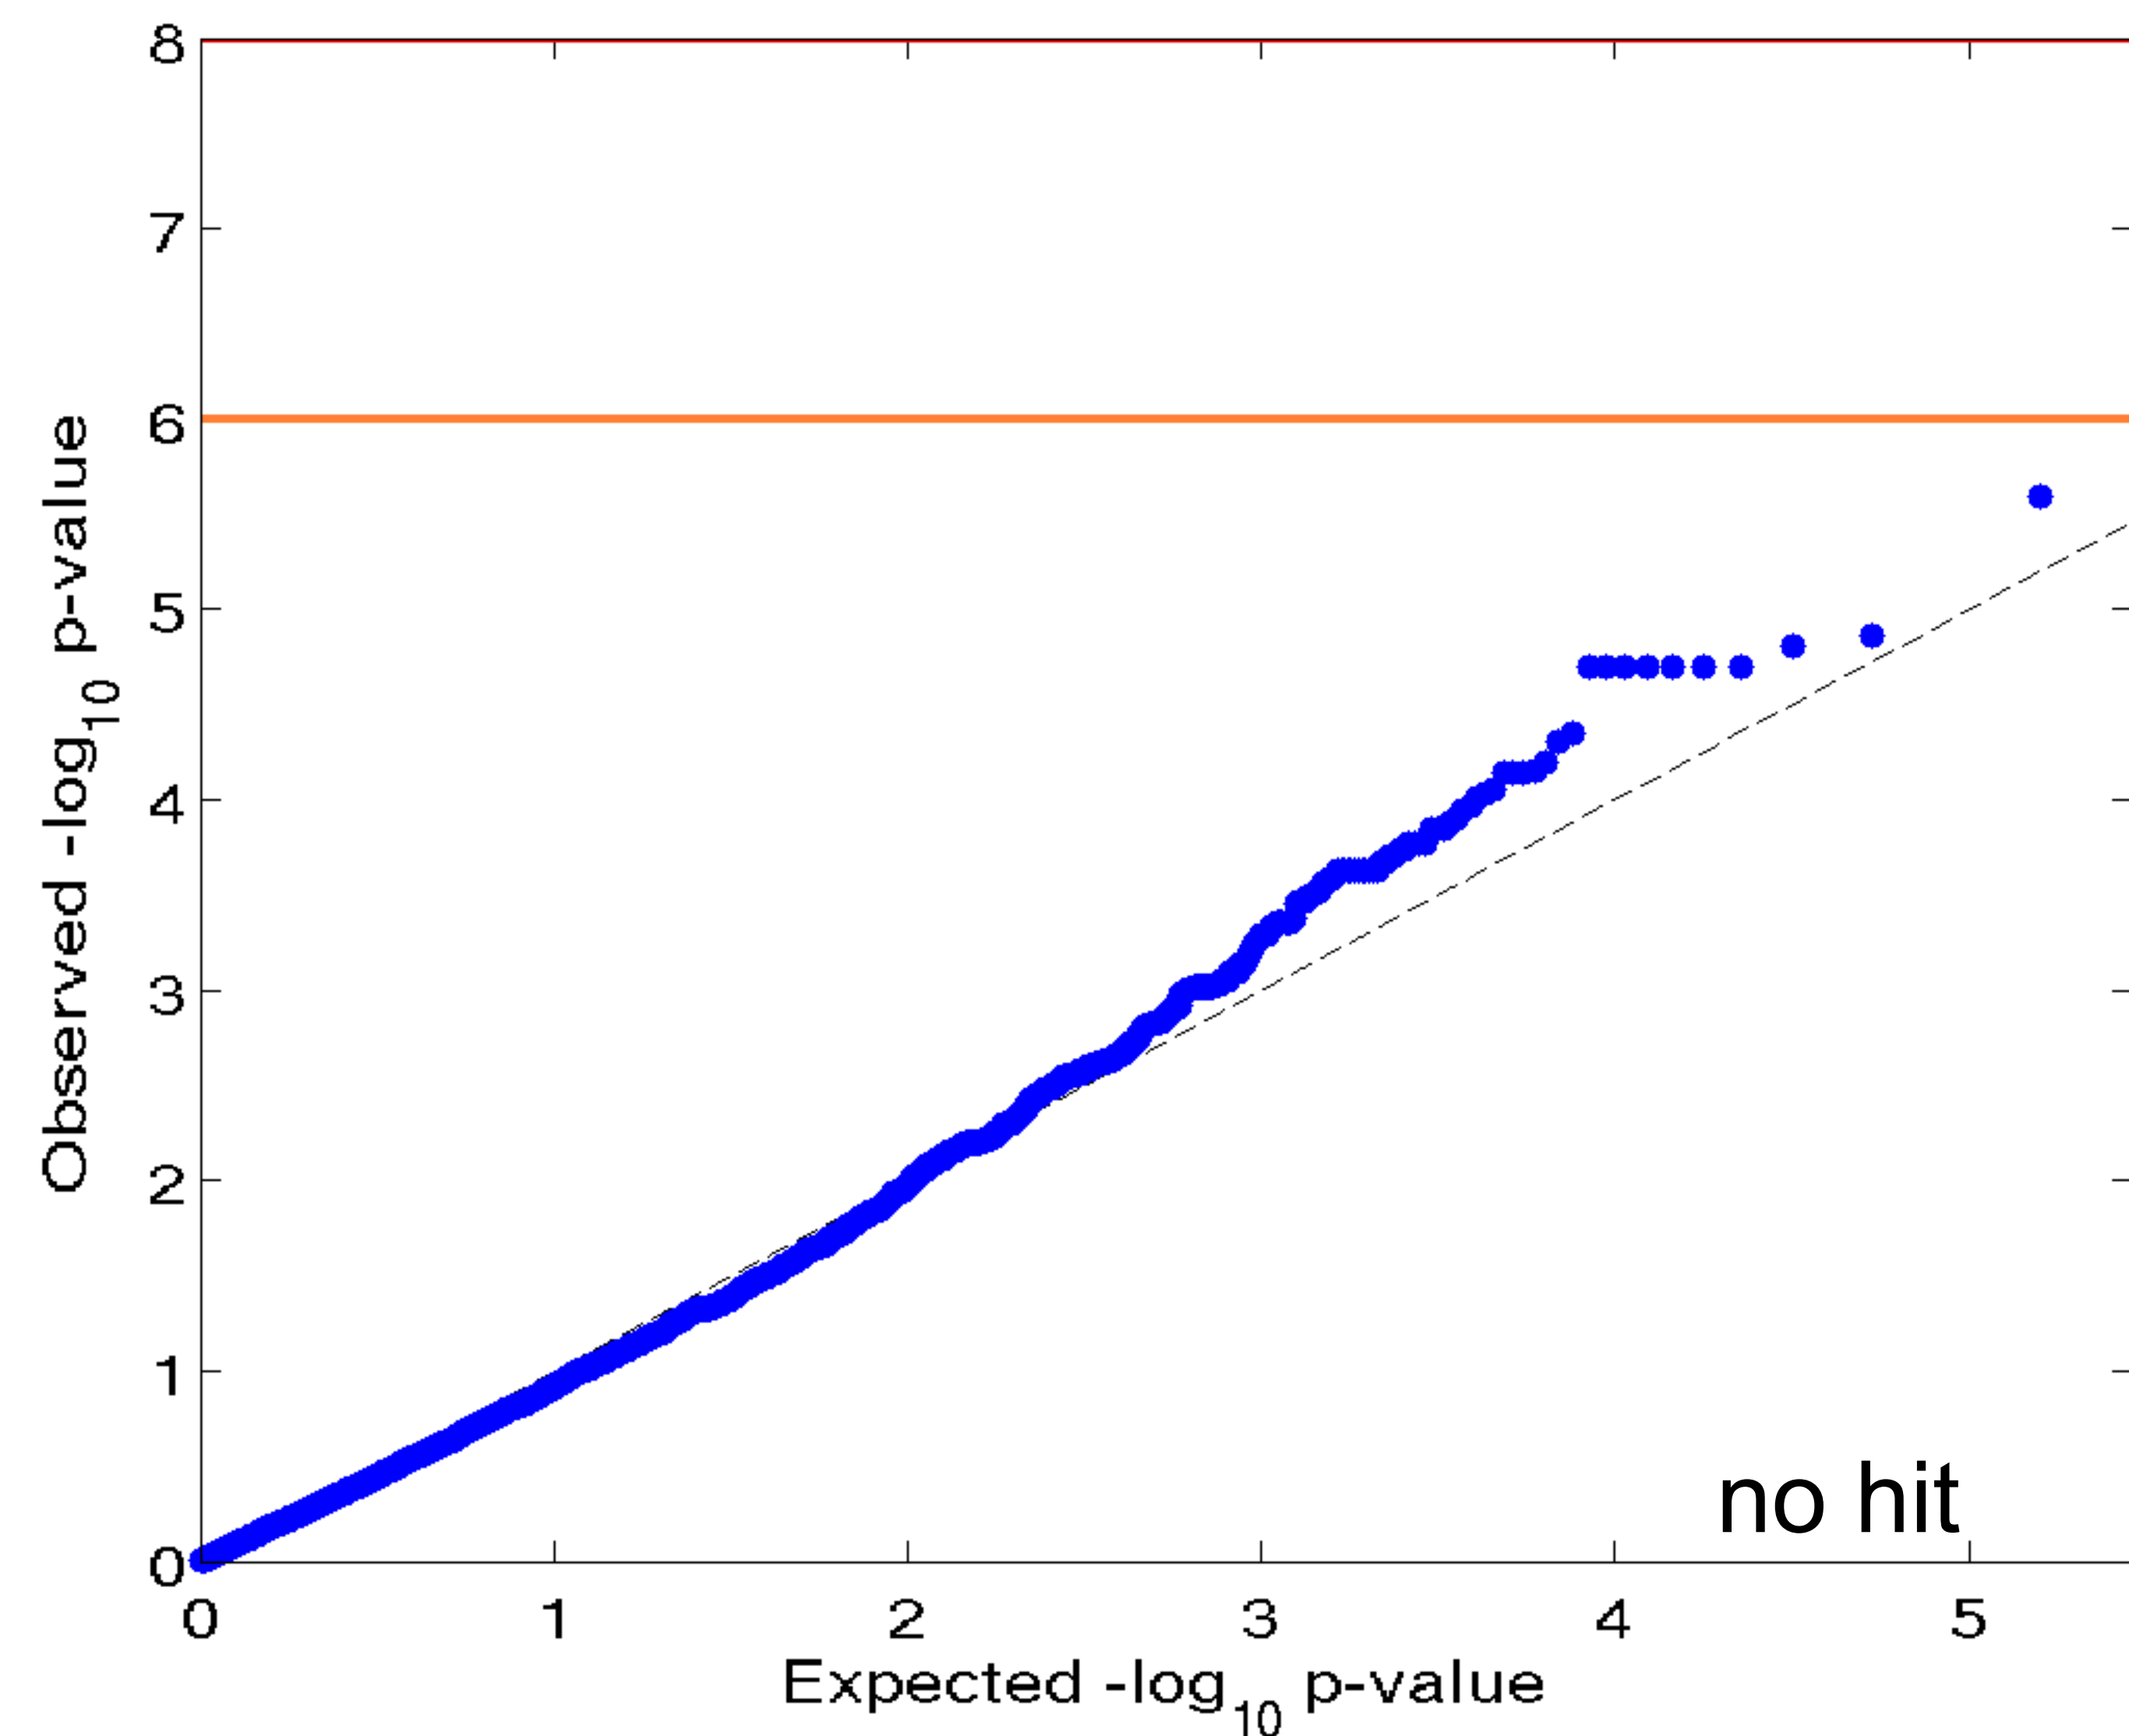

VW - iso10 vs ctr

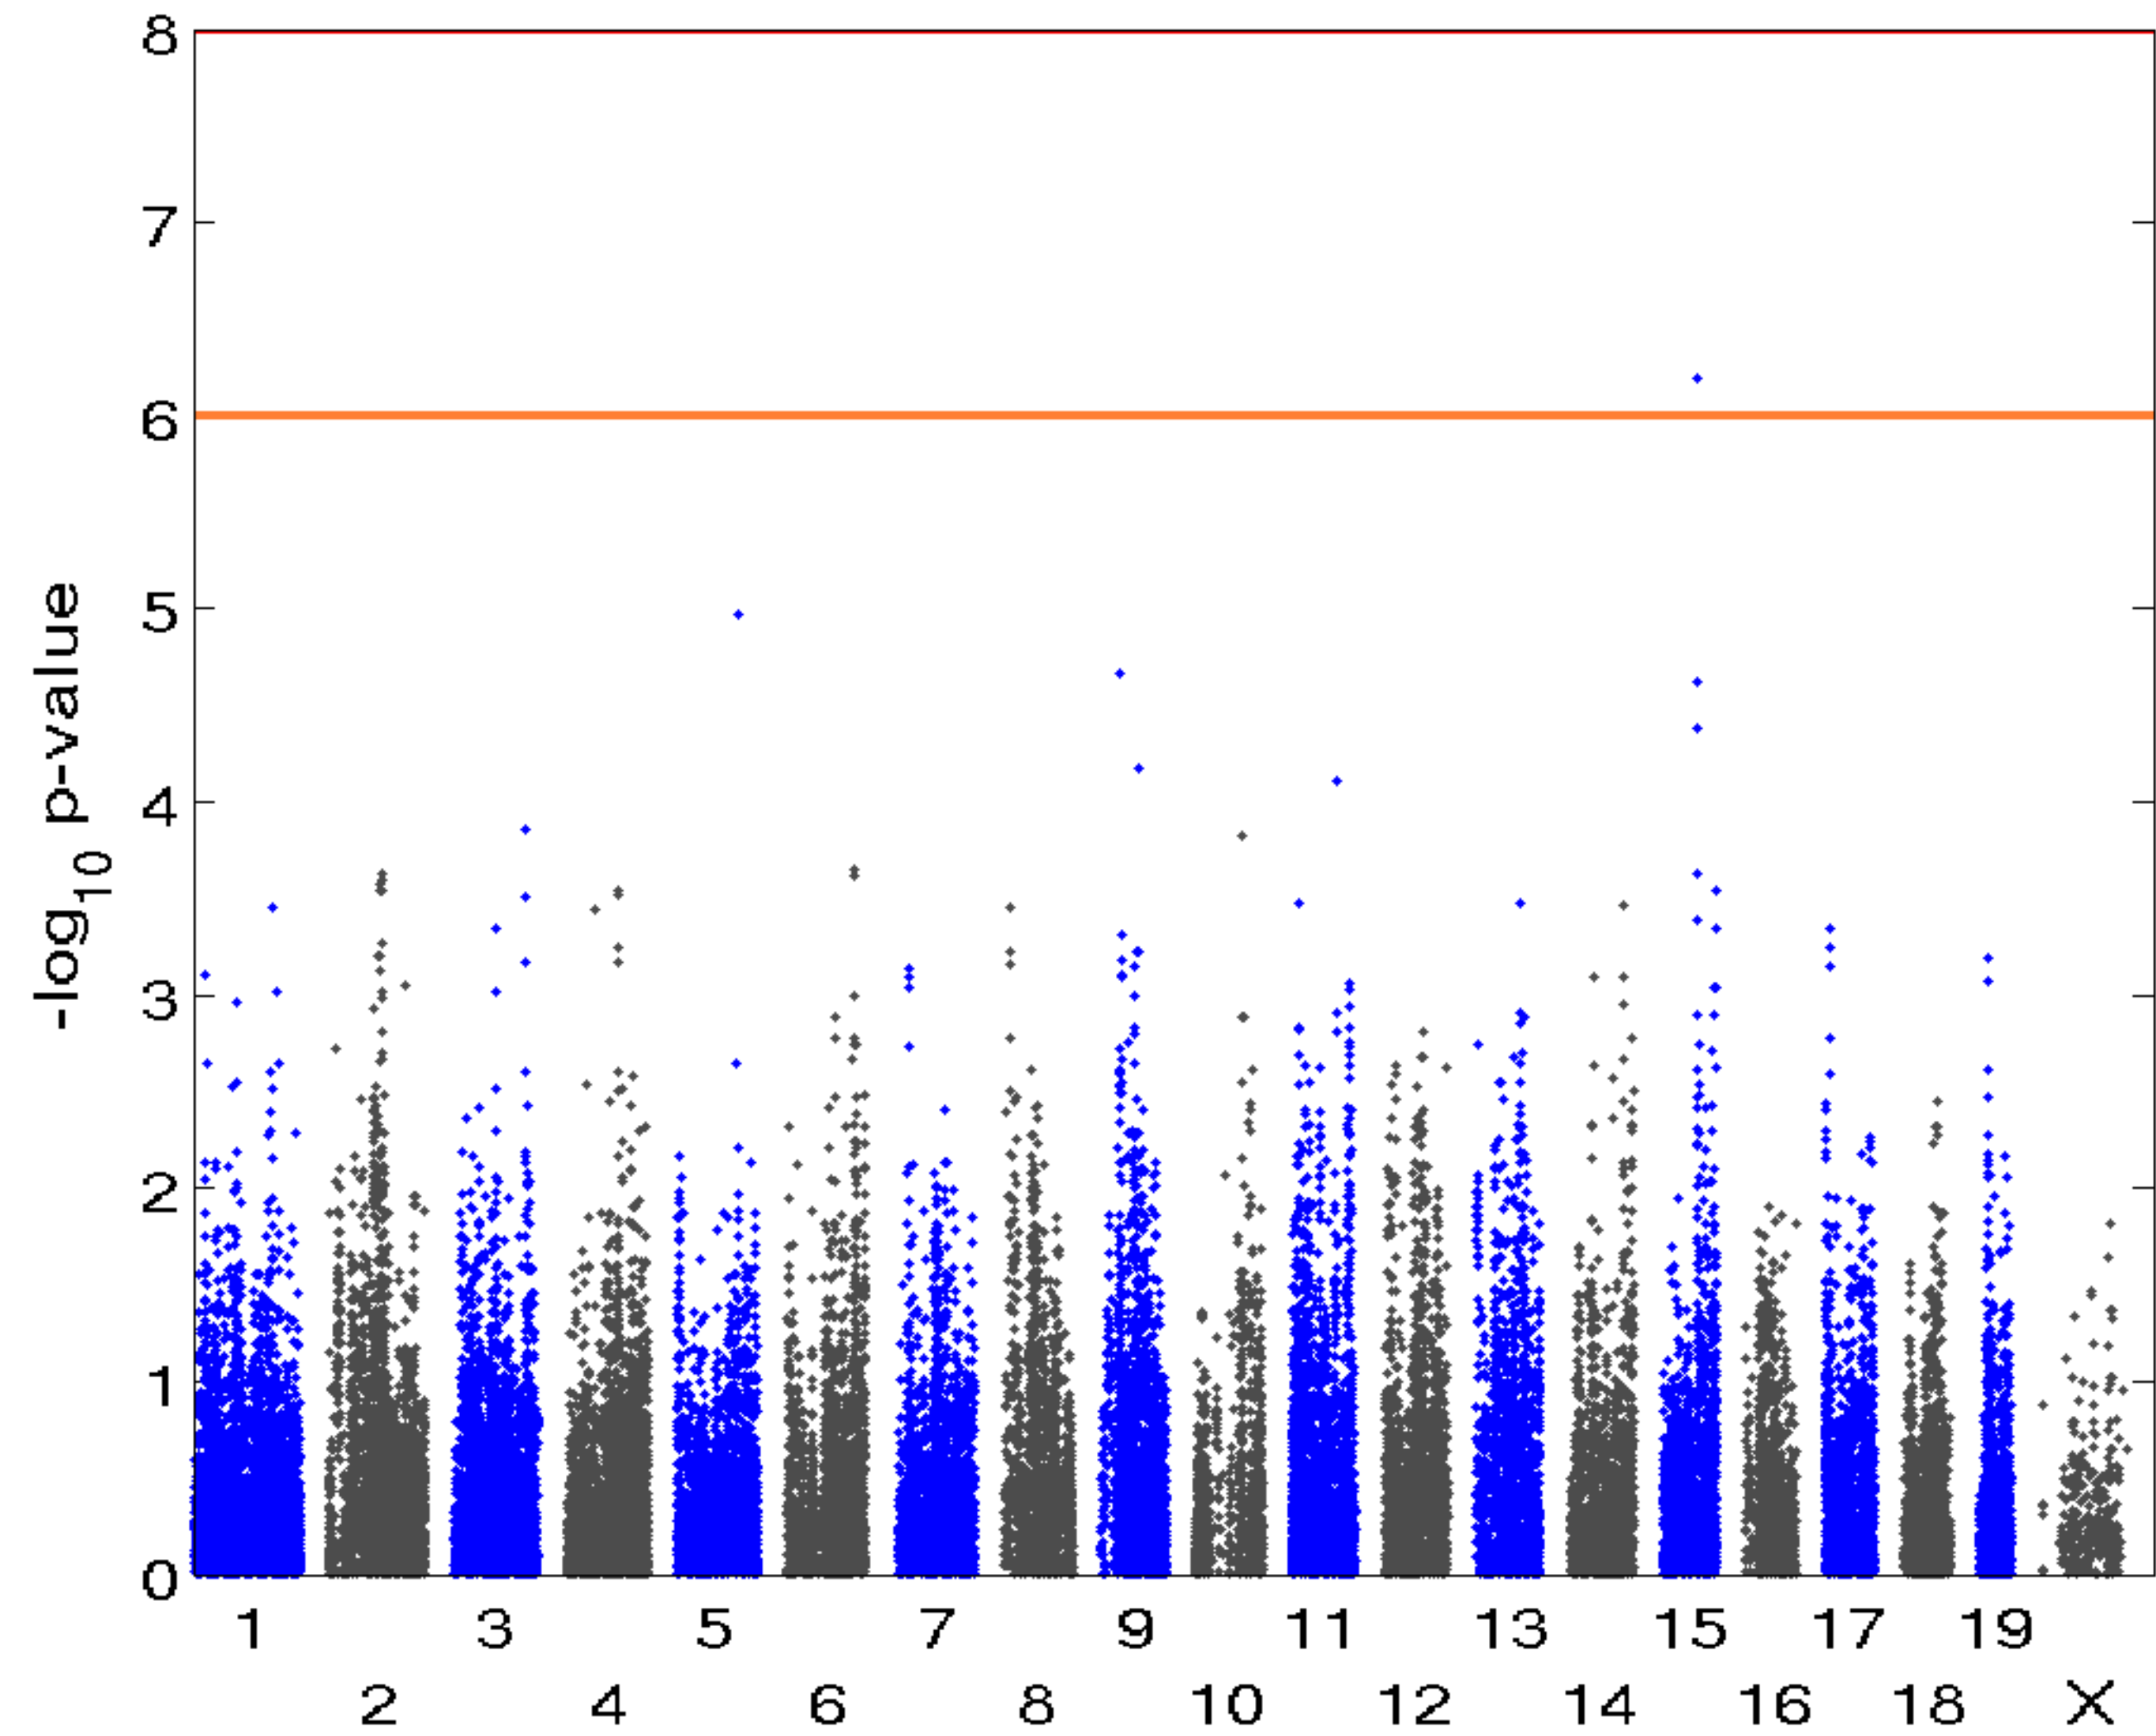

VW - iso10 vs ctr

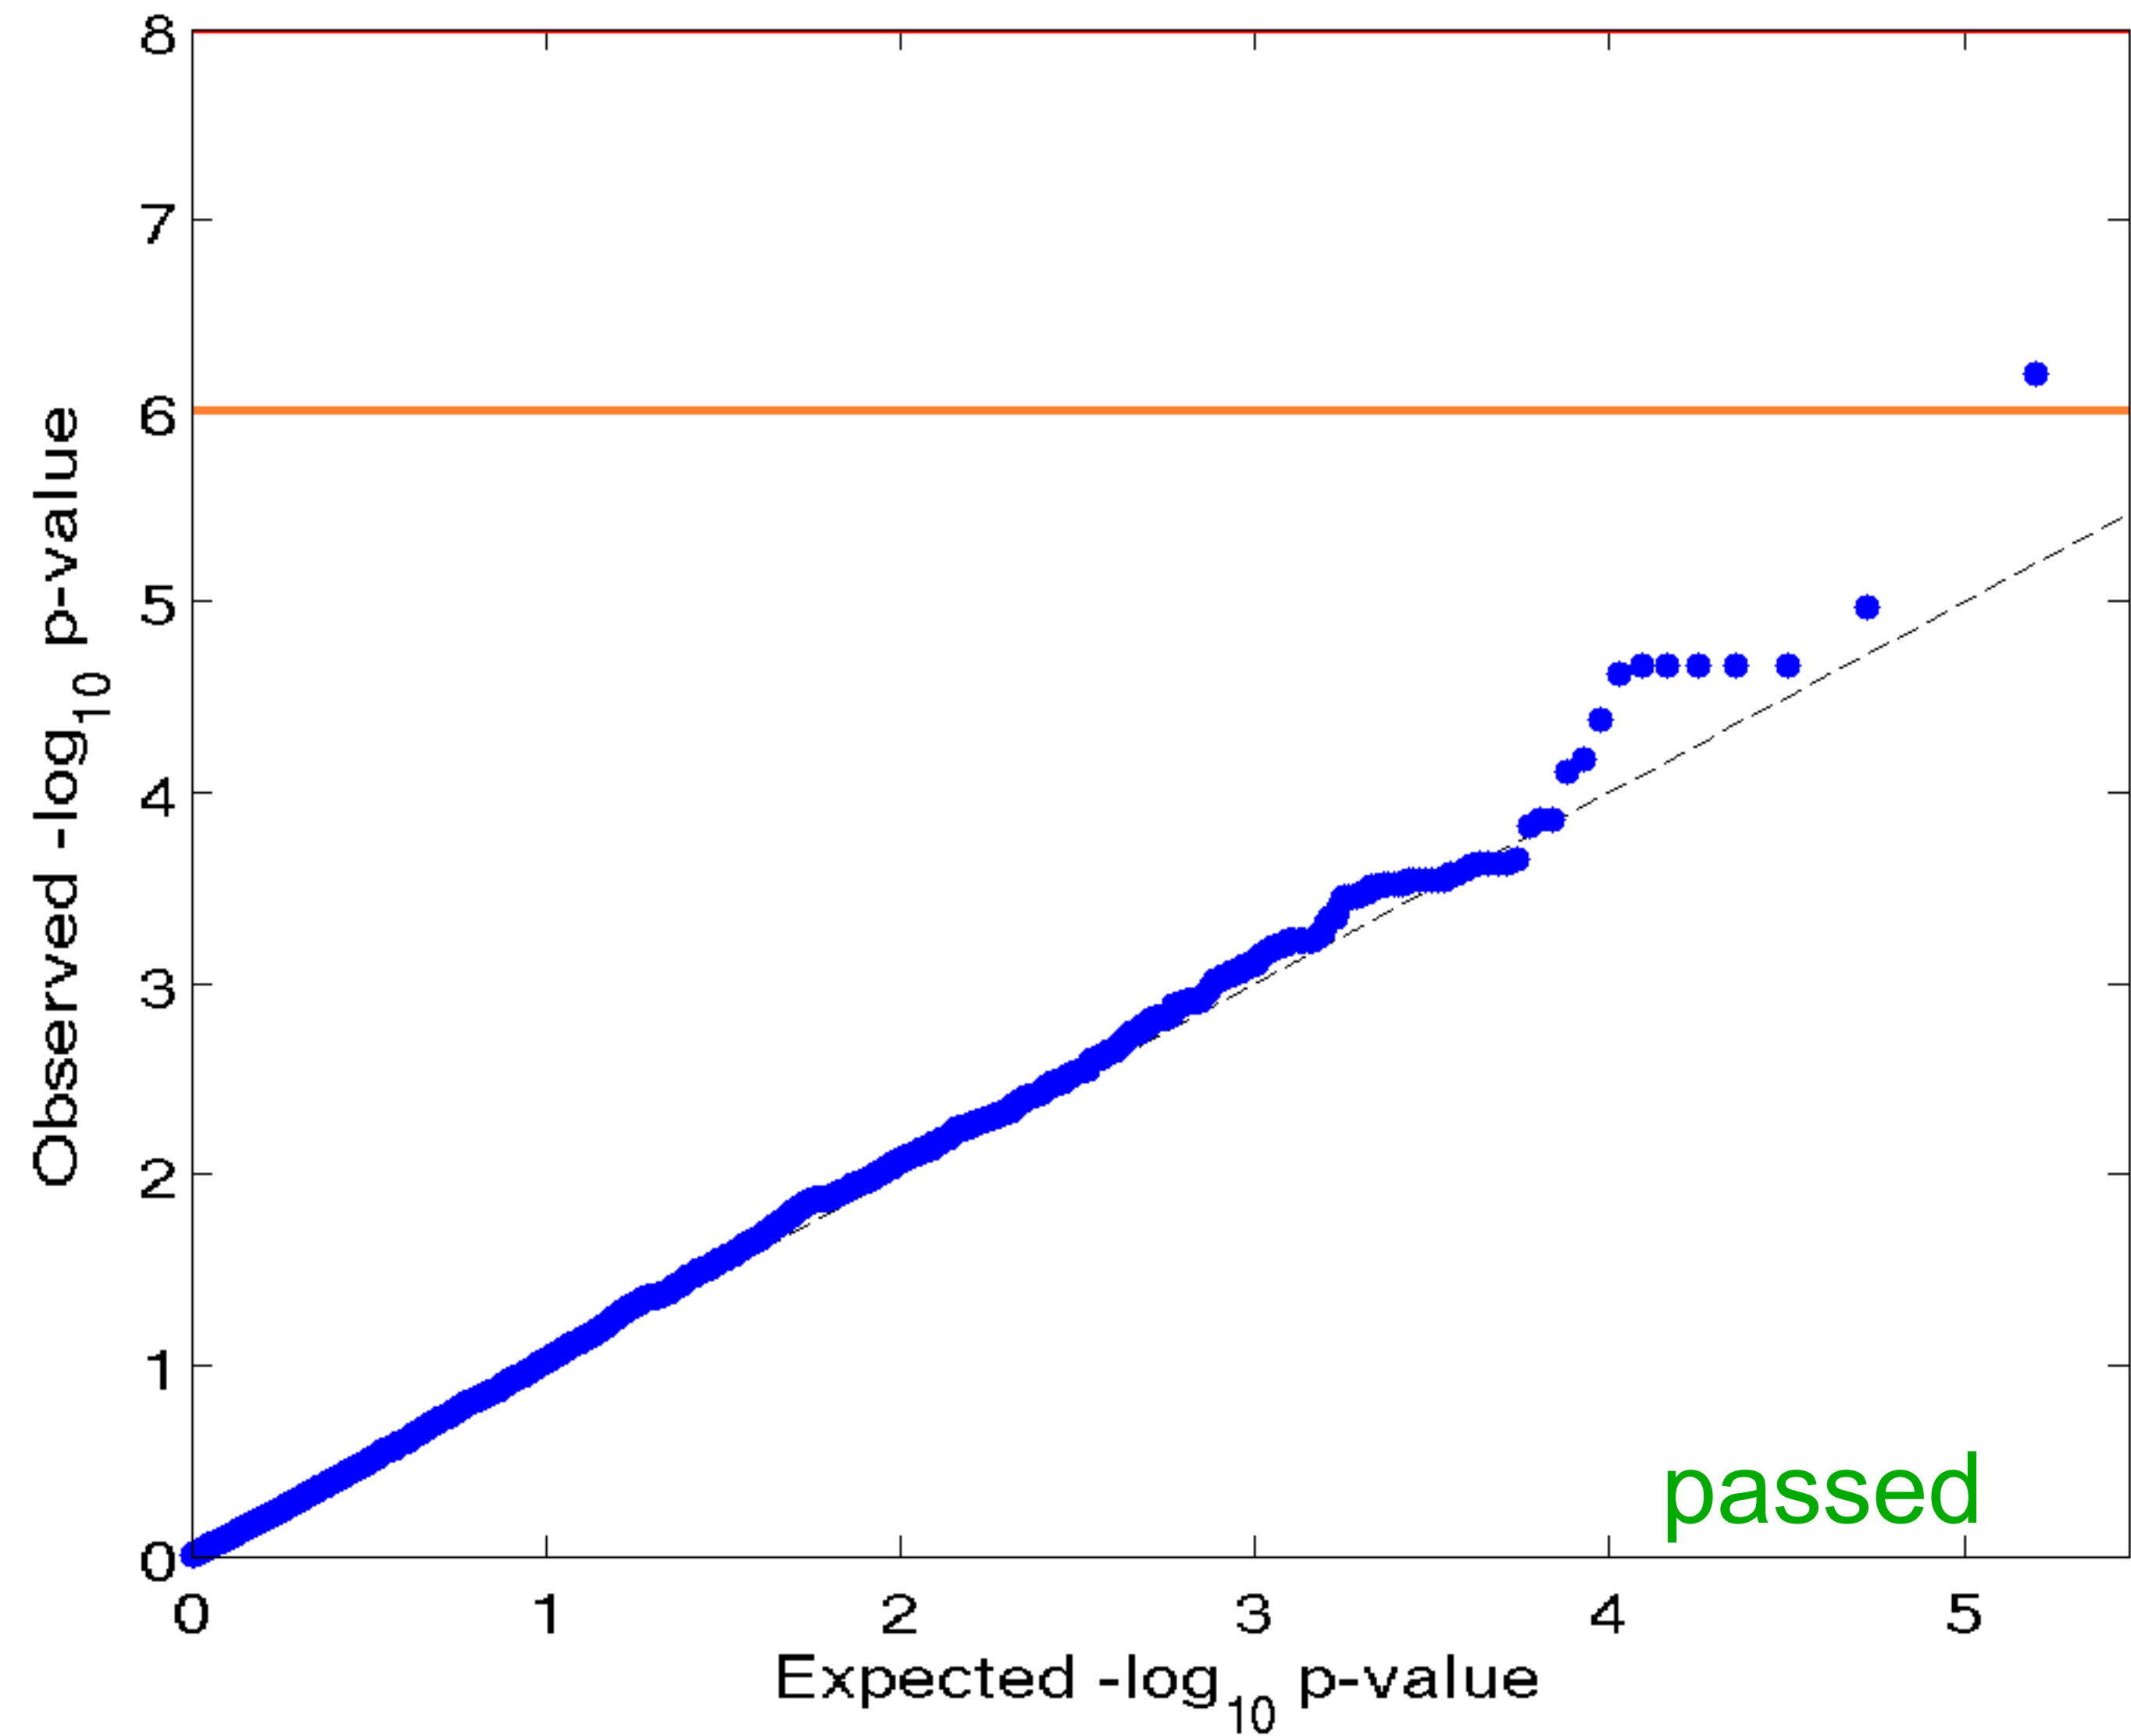

Supplement: S6 (10.1371/journal.pone.0041032.s006) [file journal.pone.0041032.s006]
