# Supplementary material for: Mapping Genetic Variants Associated with Beta-Adrenergic Responses in Inbred Mice
Source: PLOS journal article supplement (doi:10.1371/journal.pone.0041032), 2012-07-31

AW/BWS - iso10 vs ate

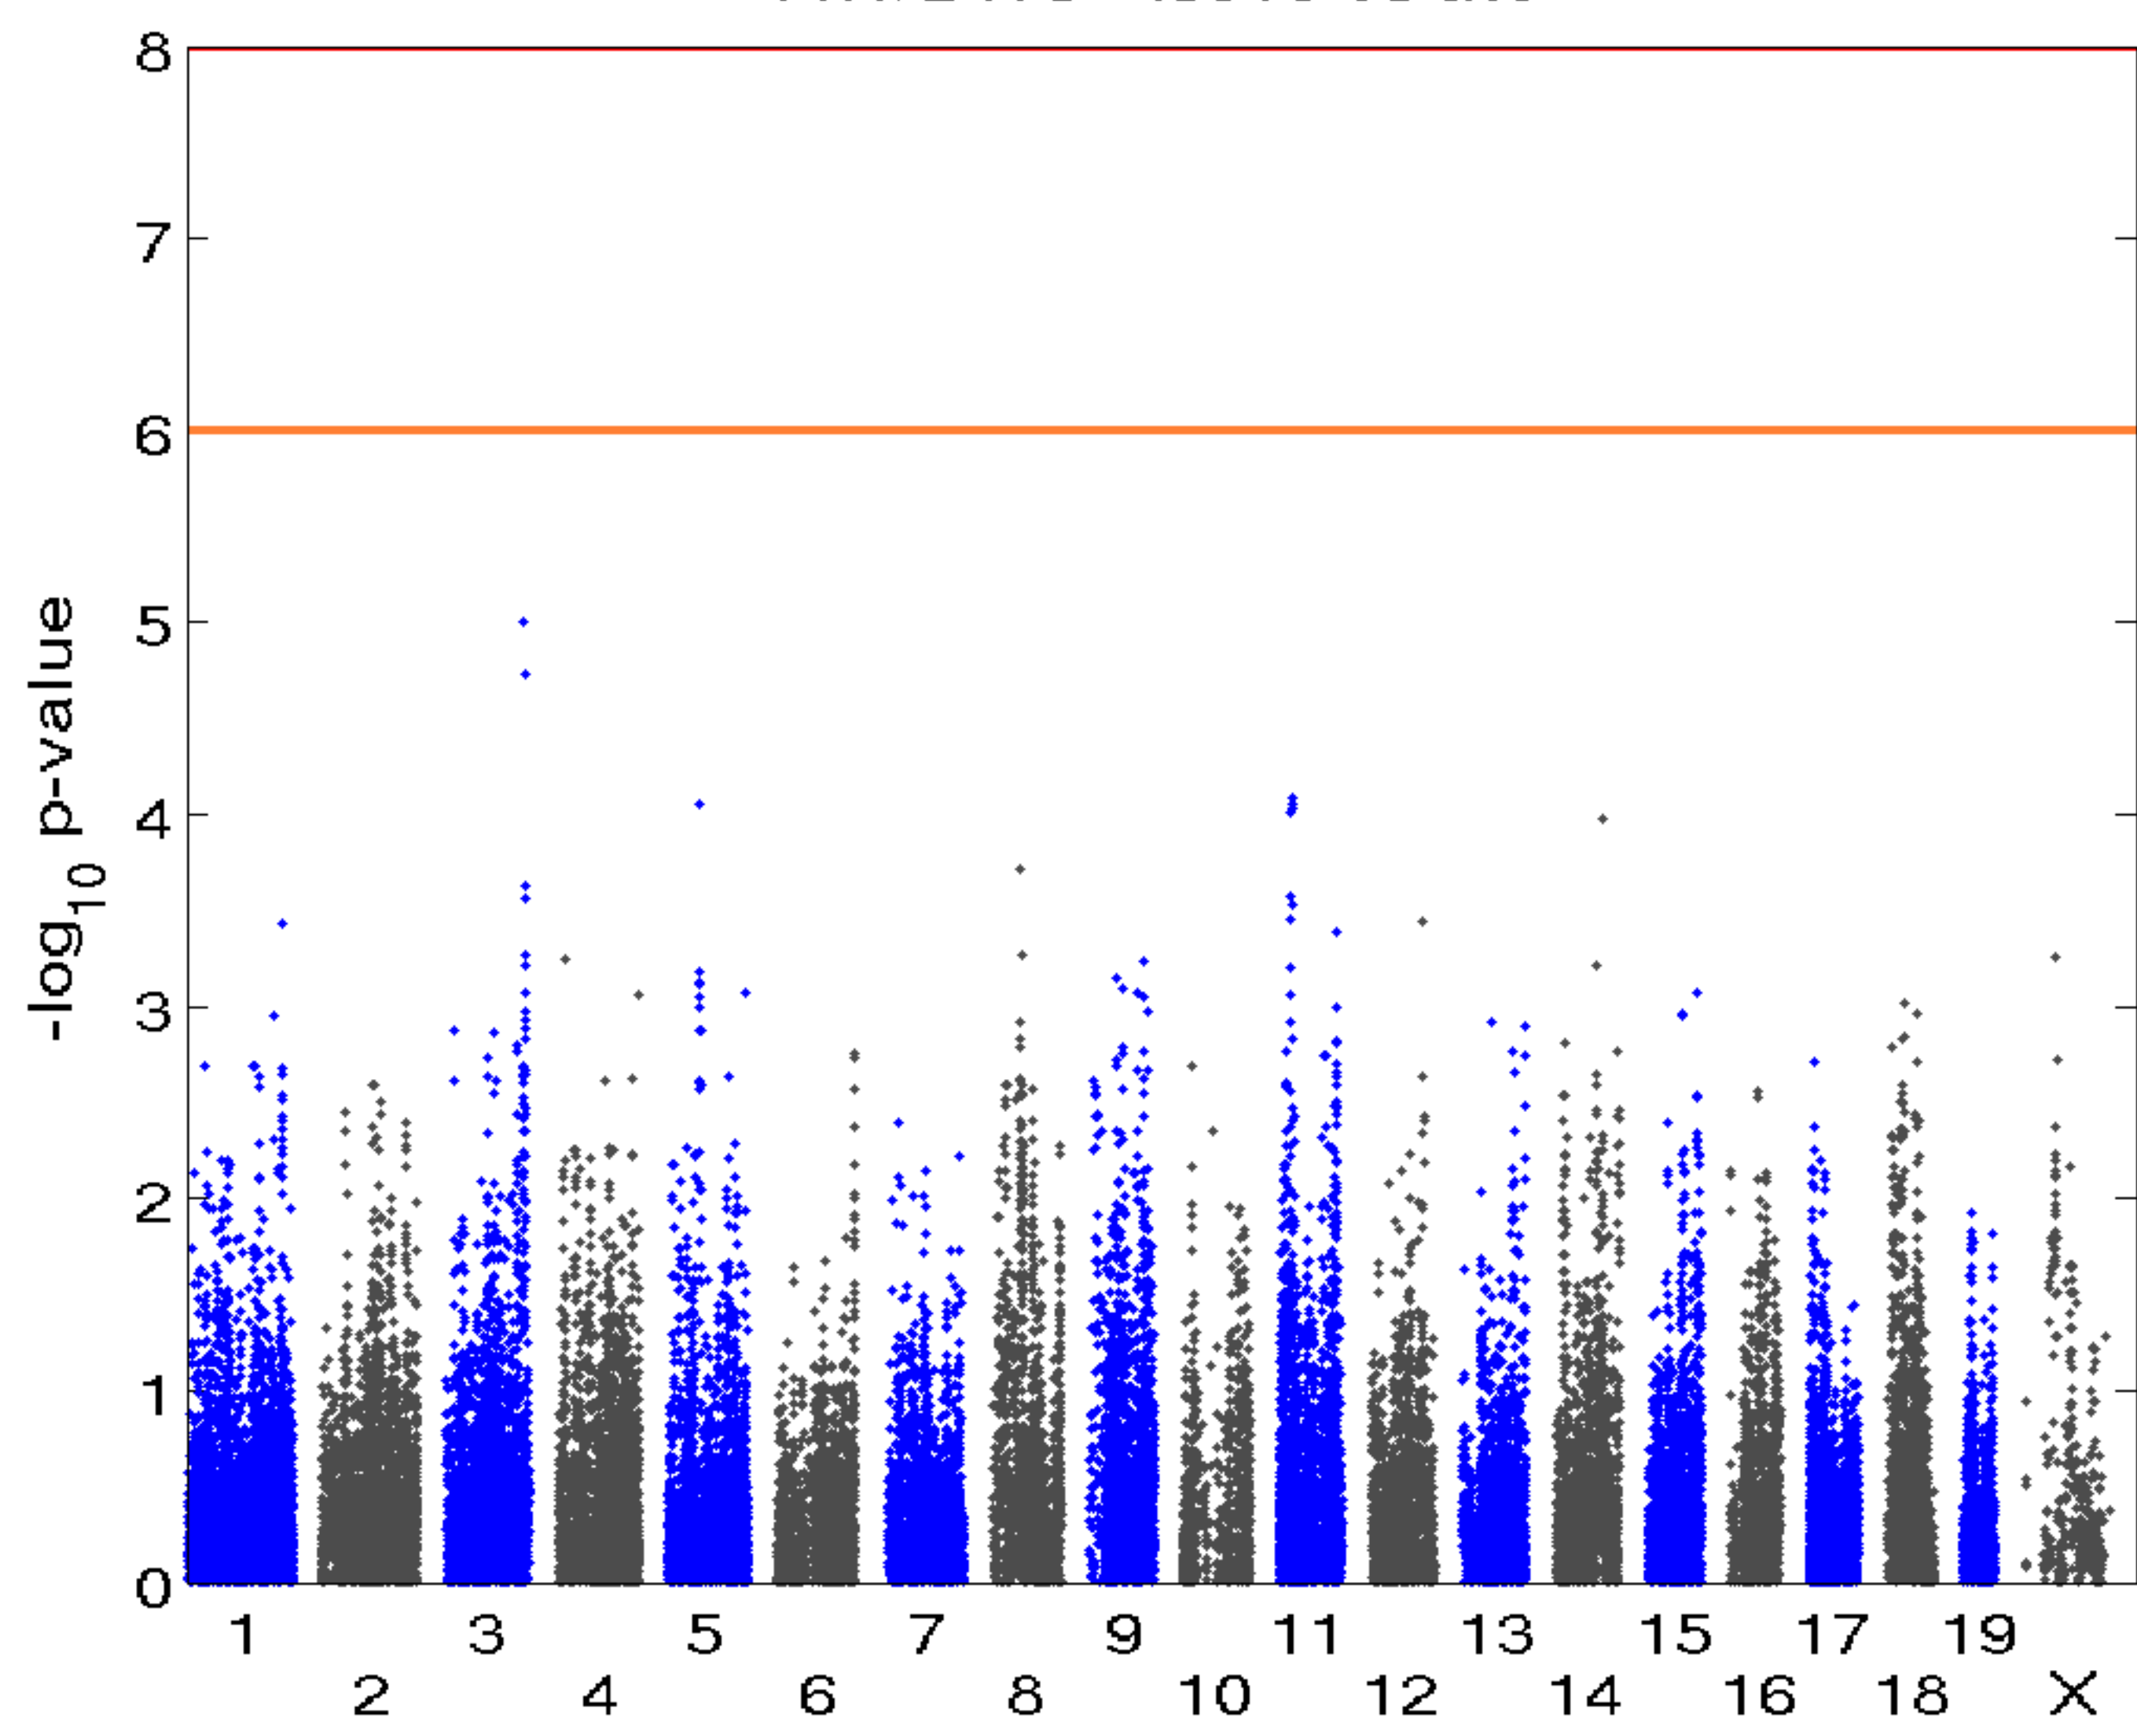

AW/BWS - iso10 vs ate

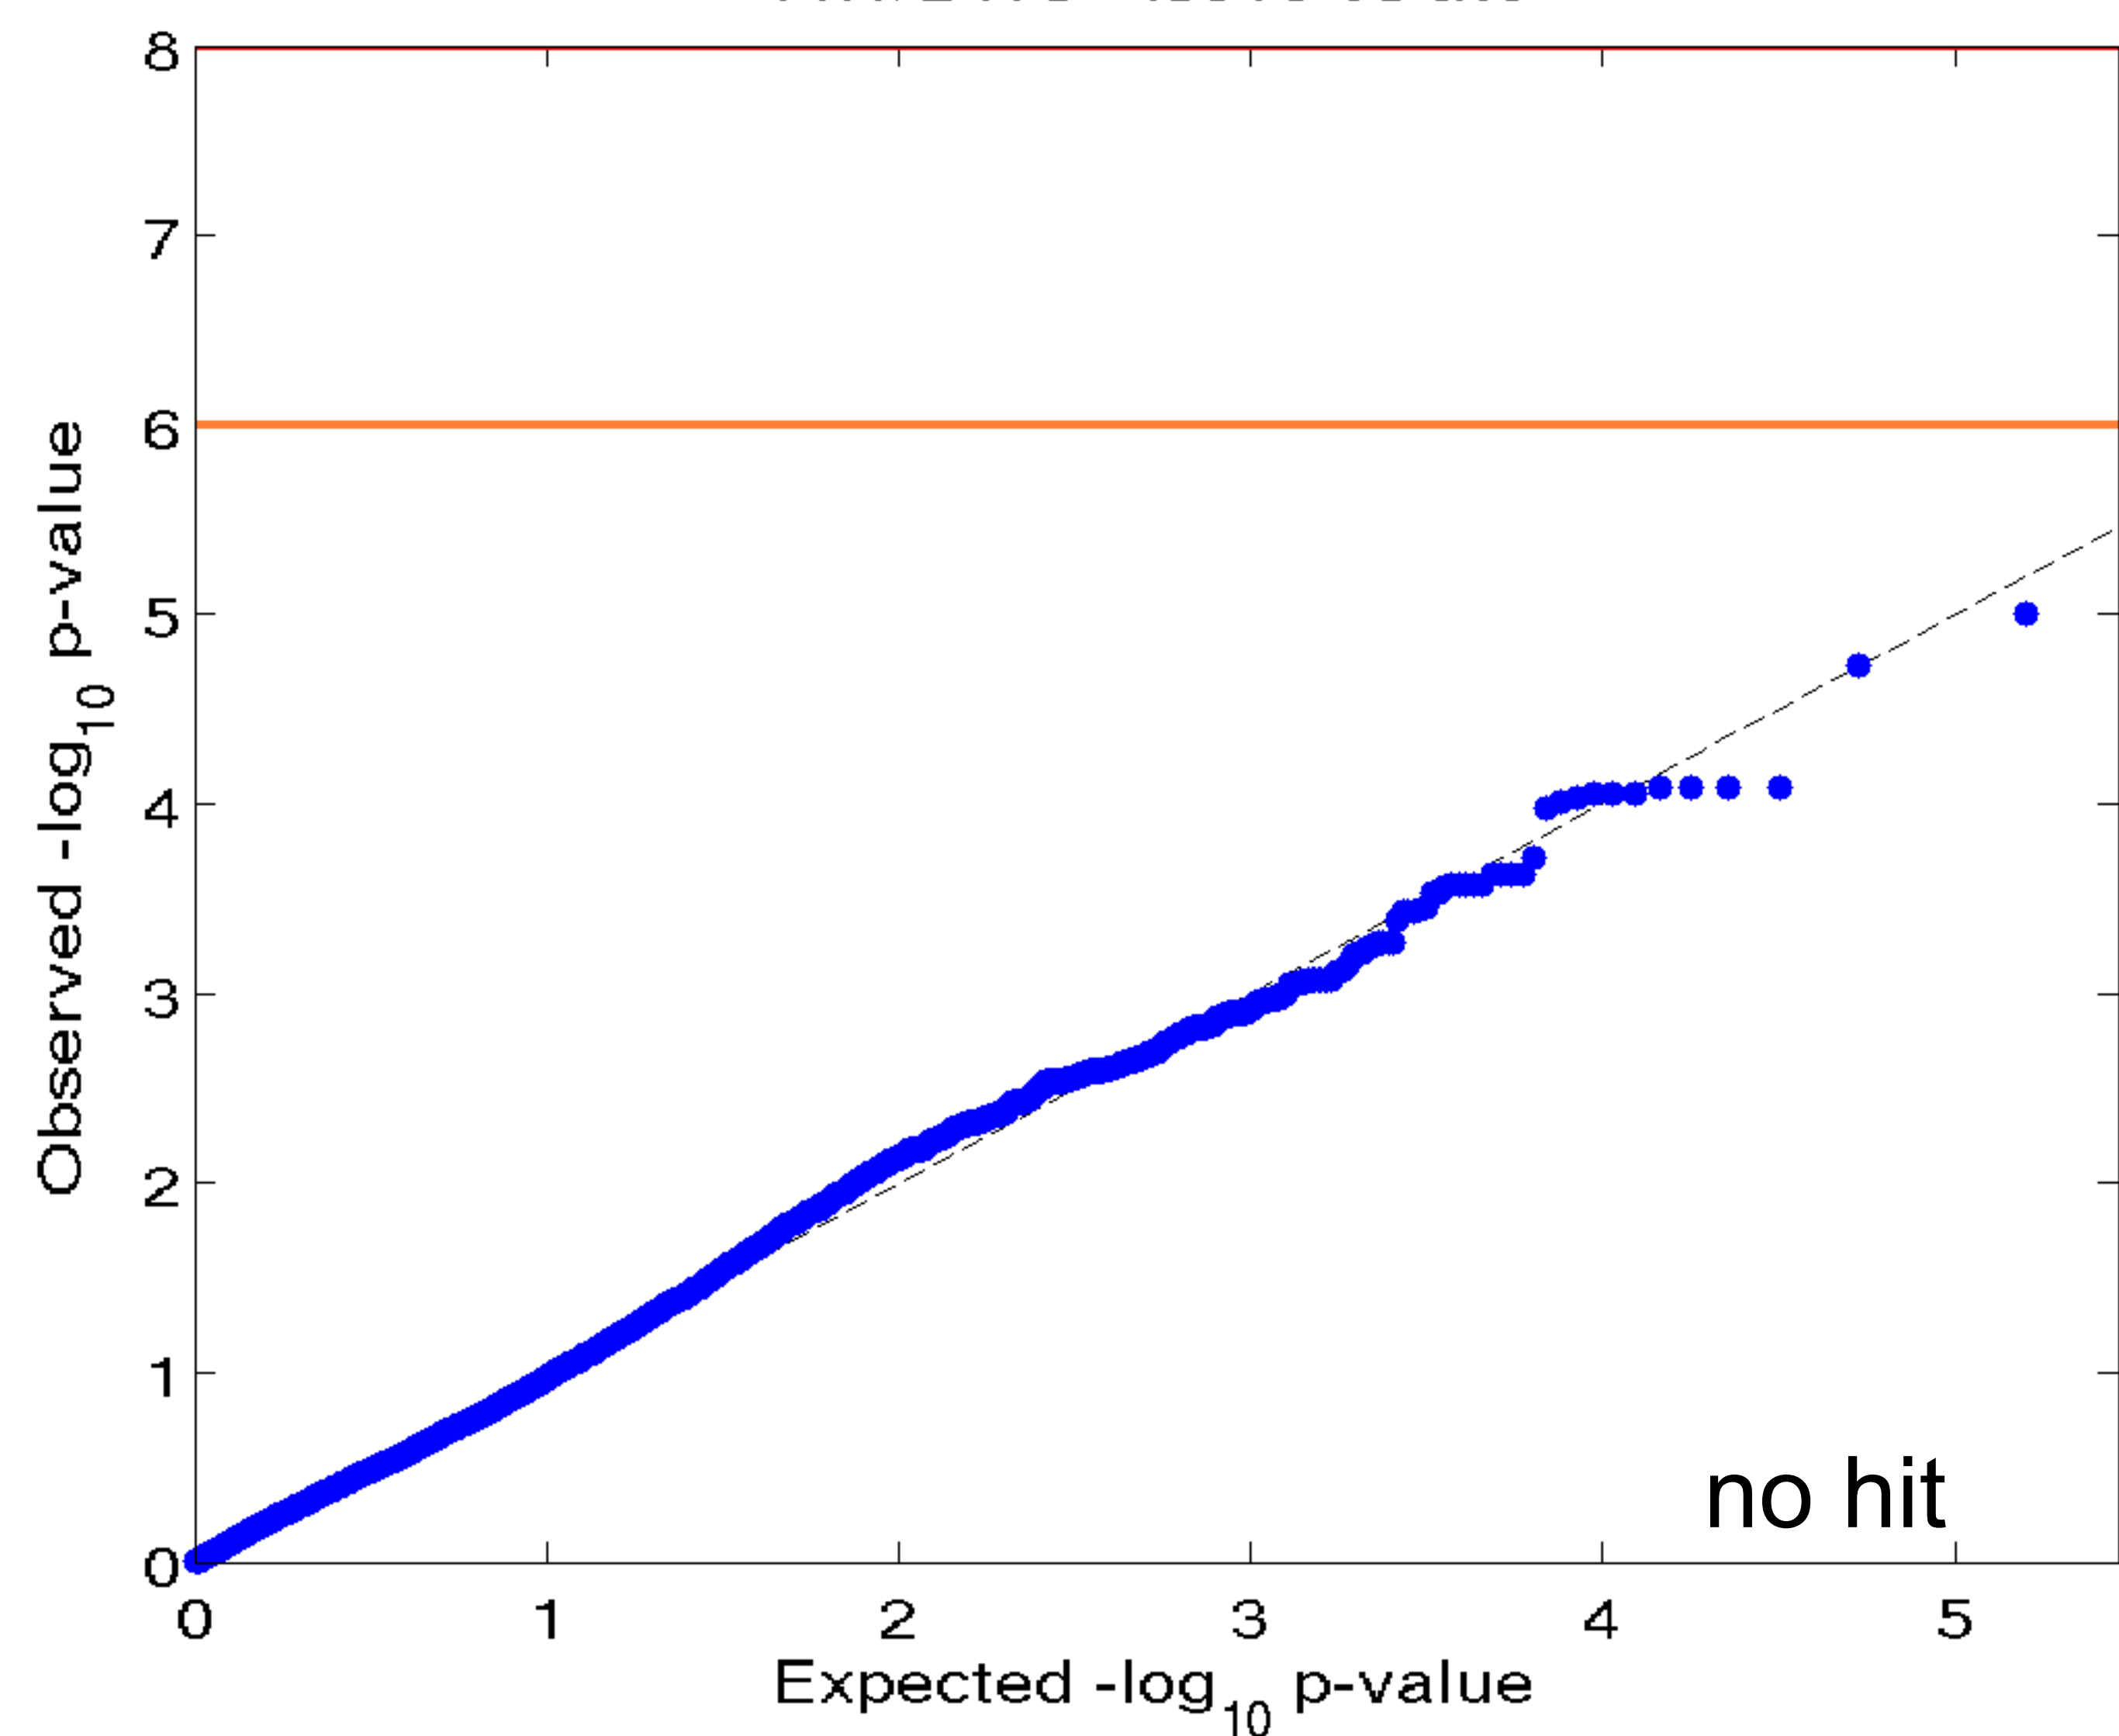

AWI - iso10 vs ate

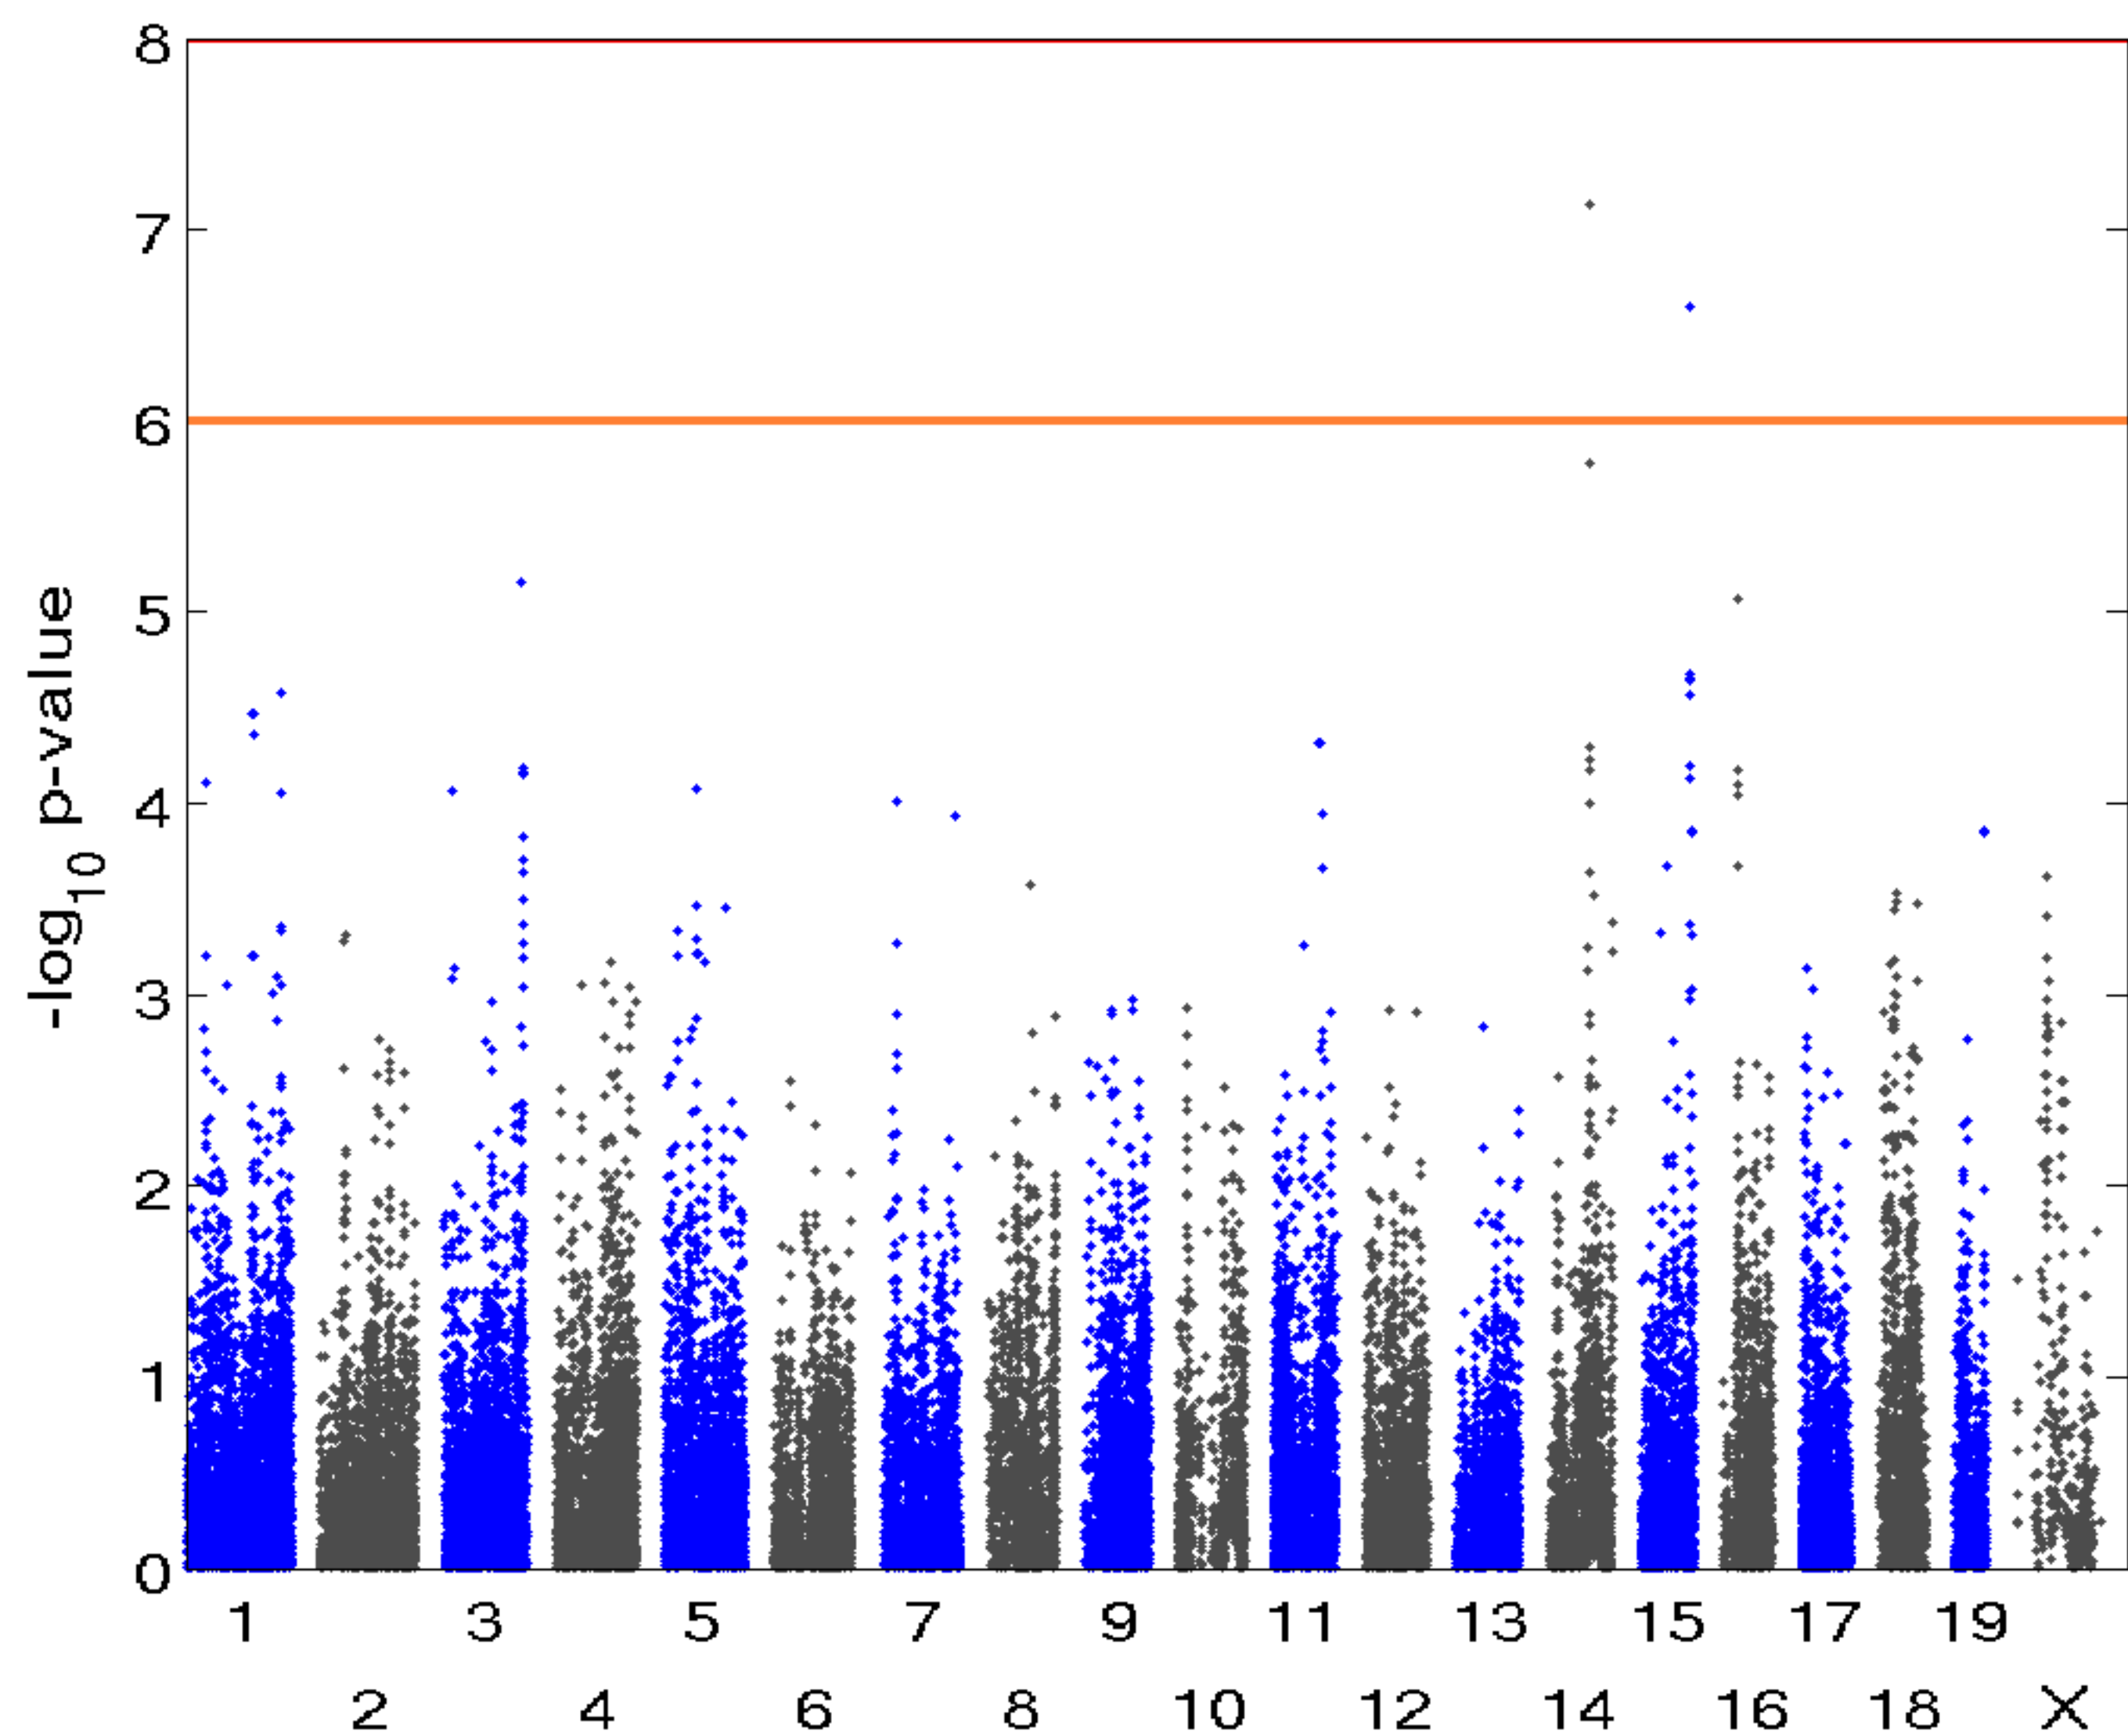

AWI - iso10 vs ate

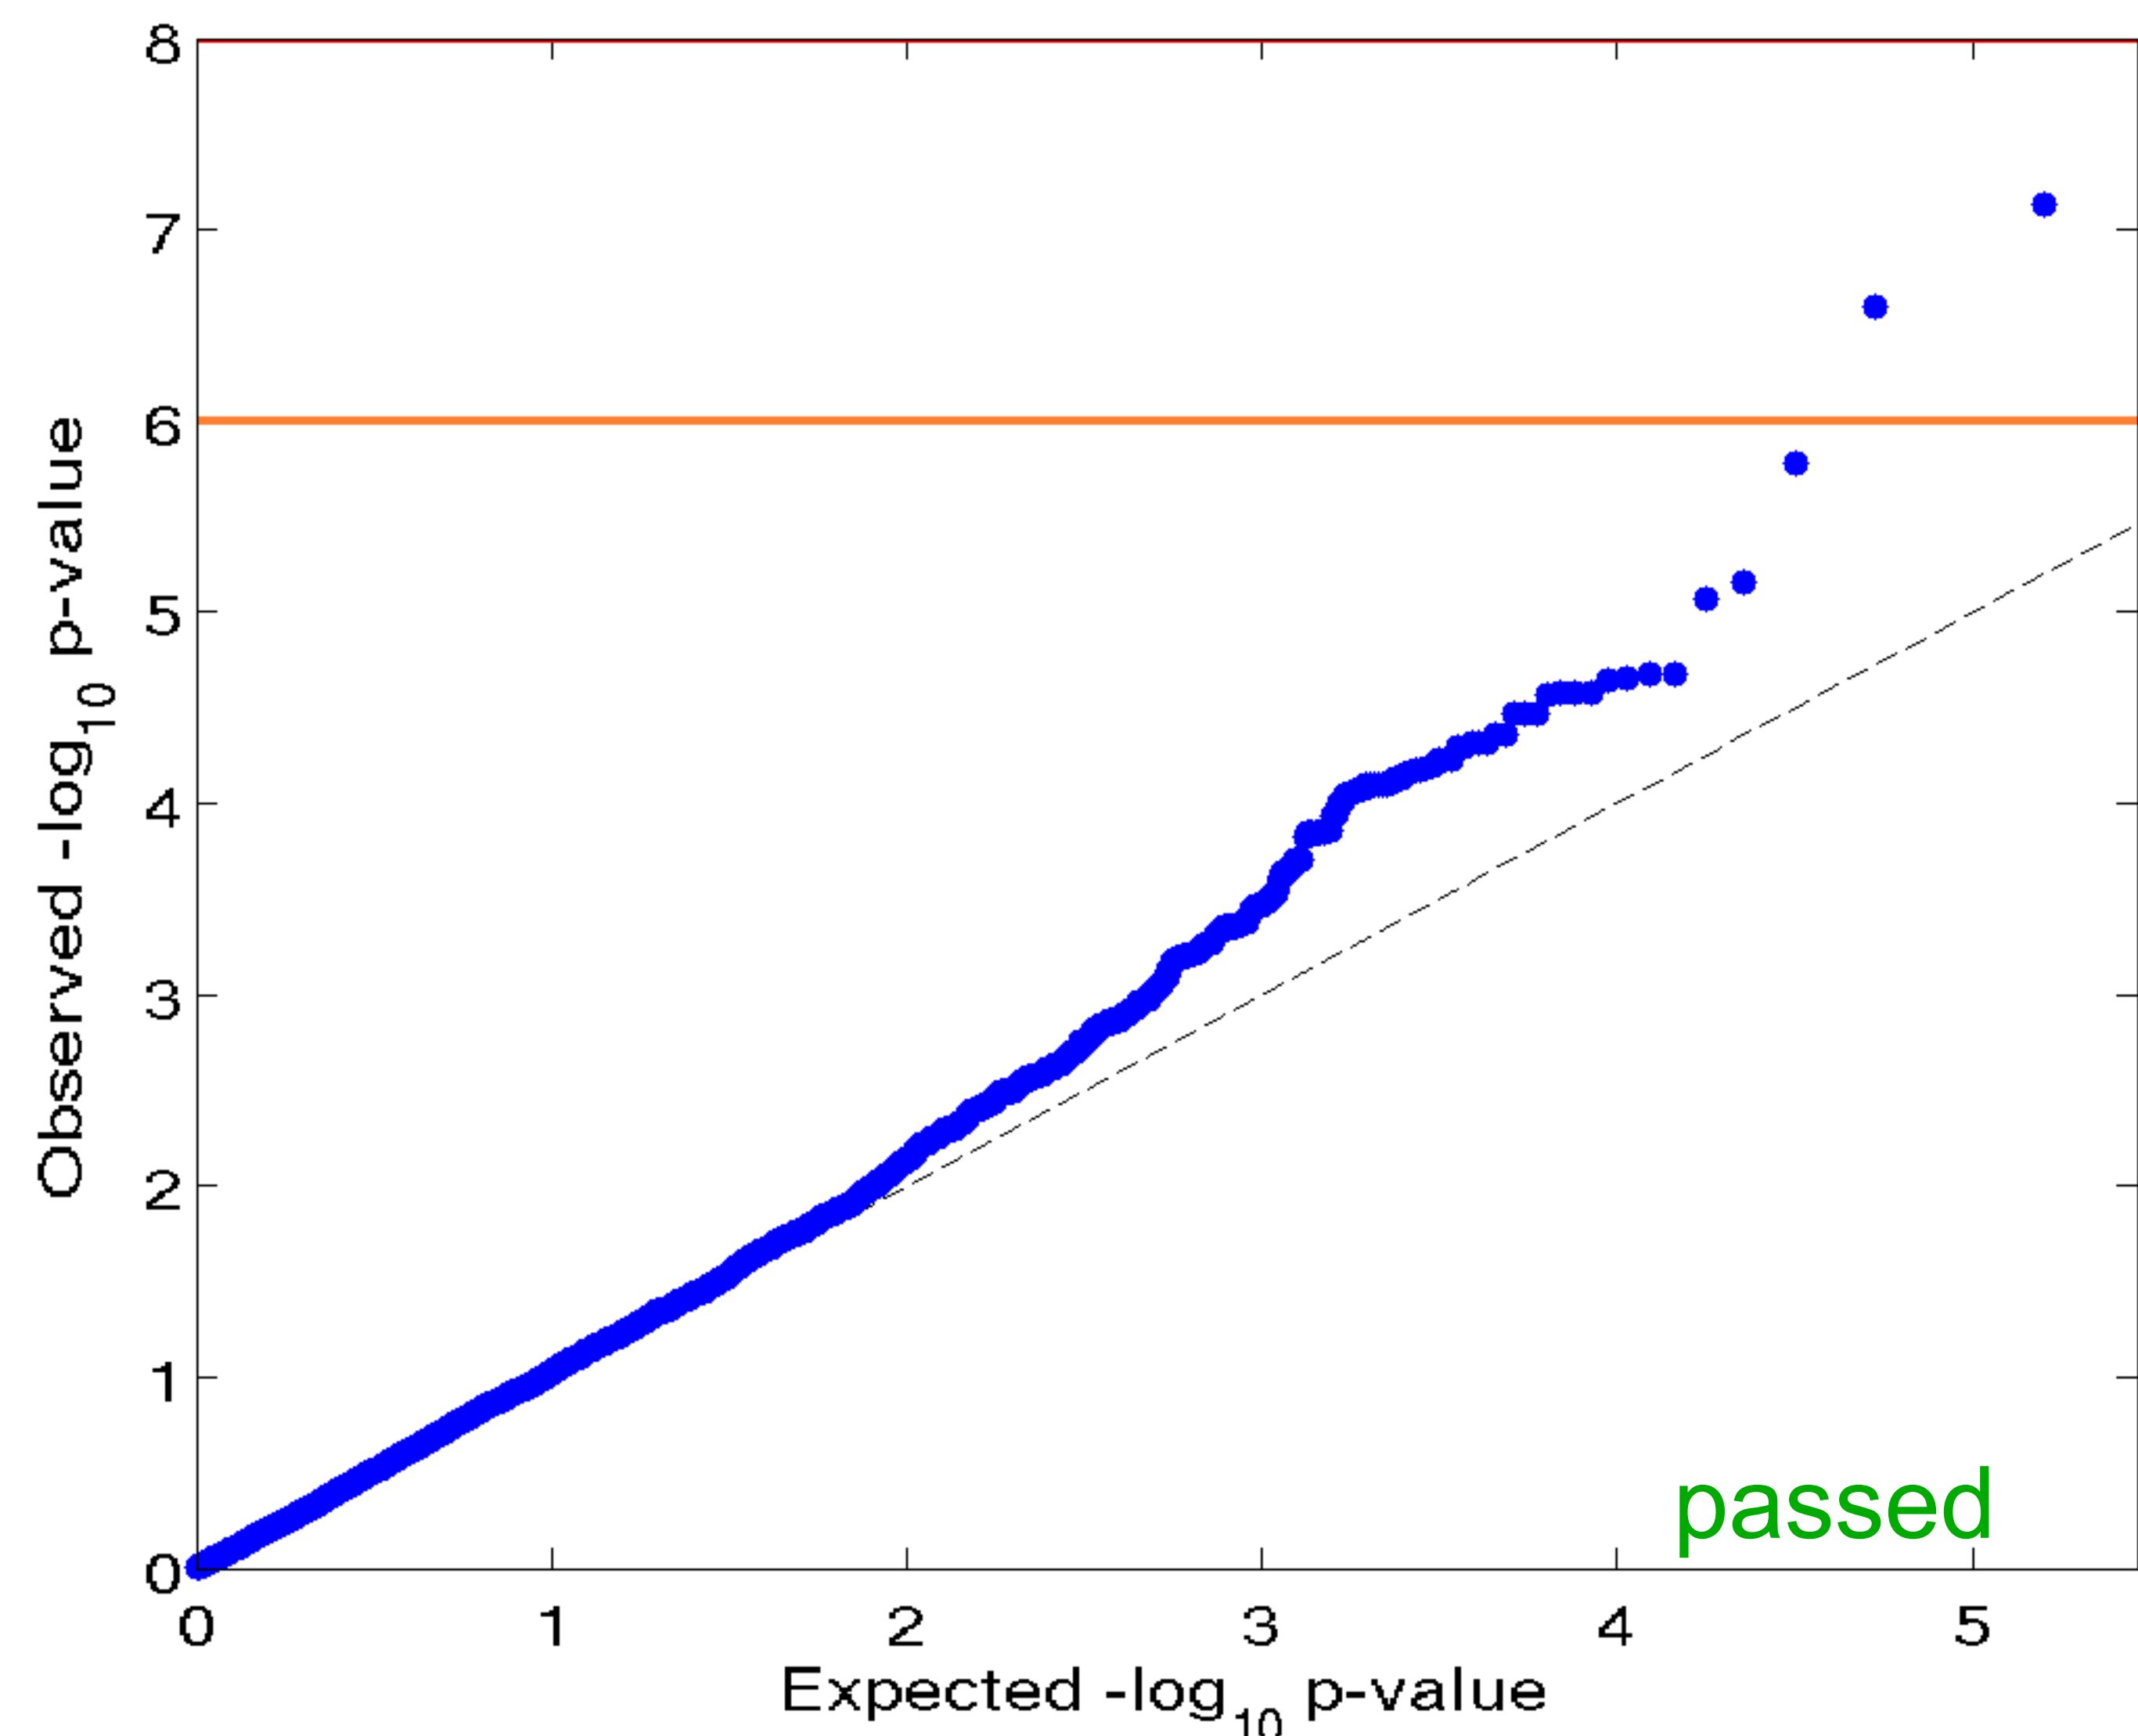

AW - iso10 vs ate

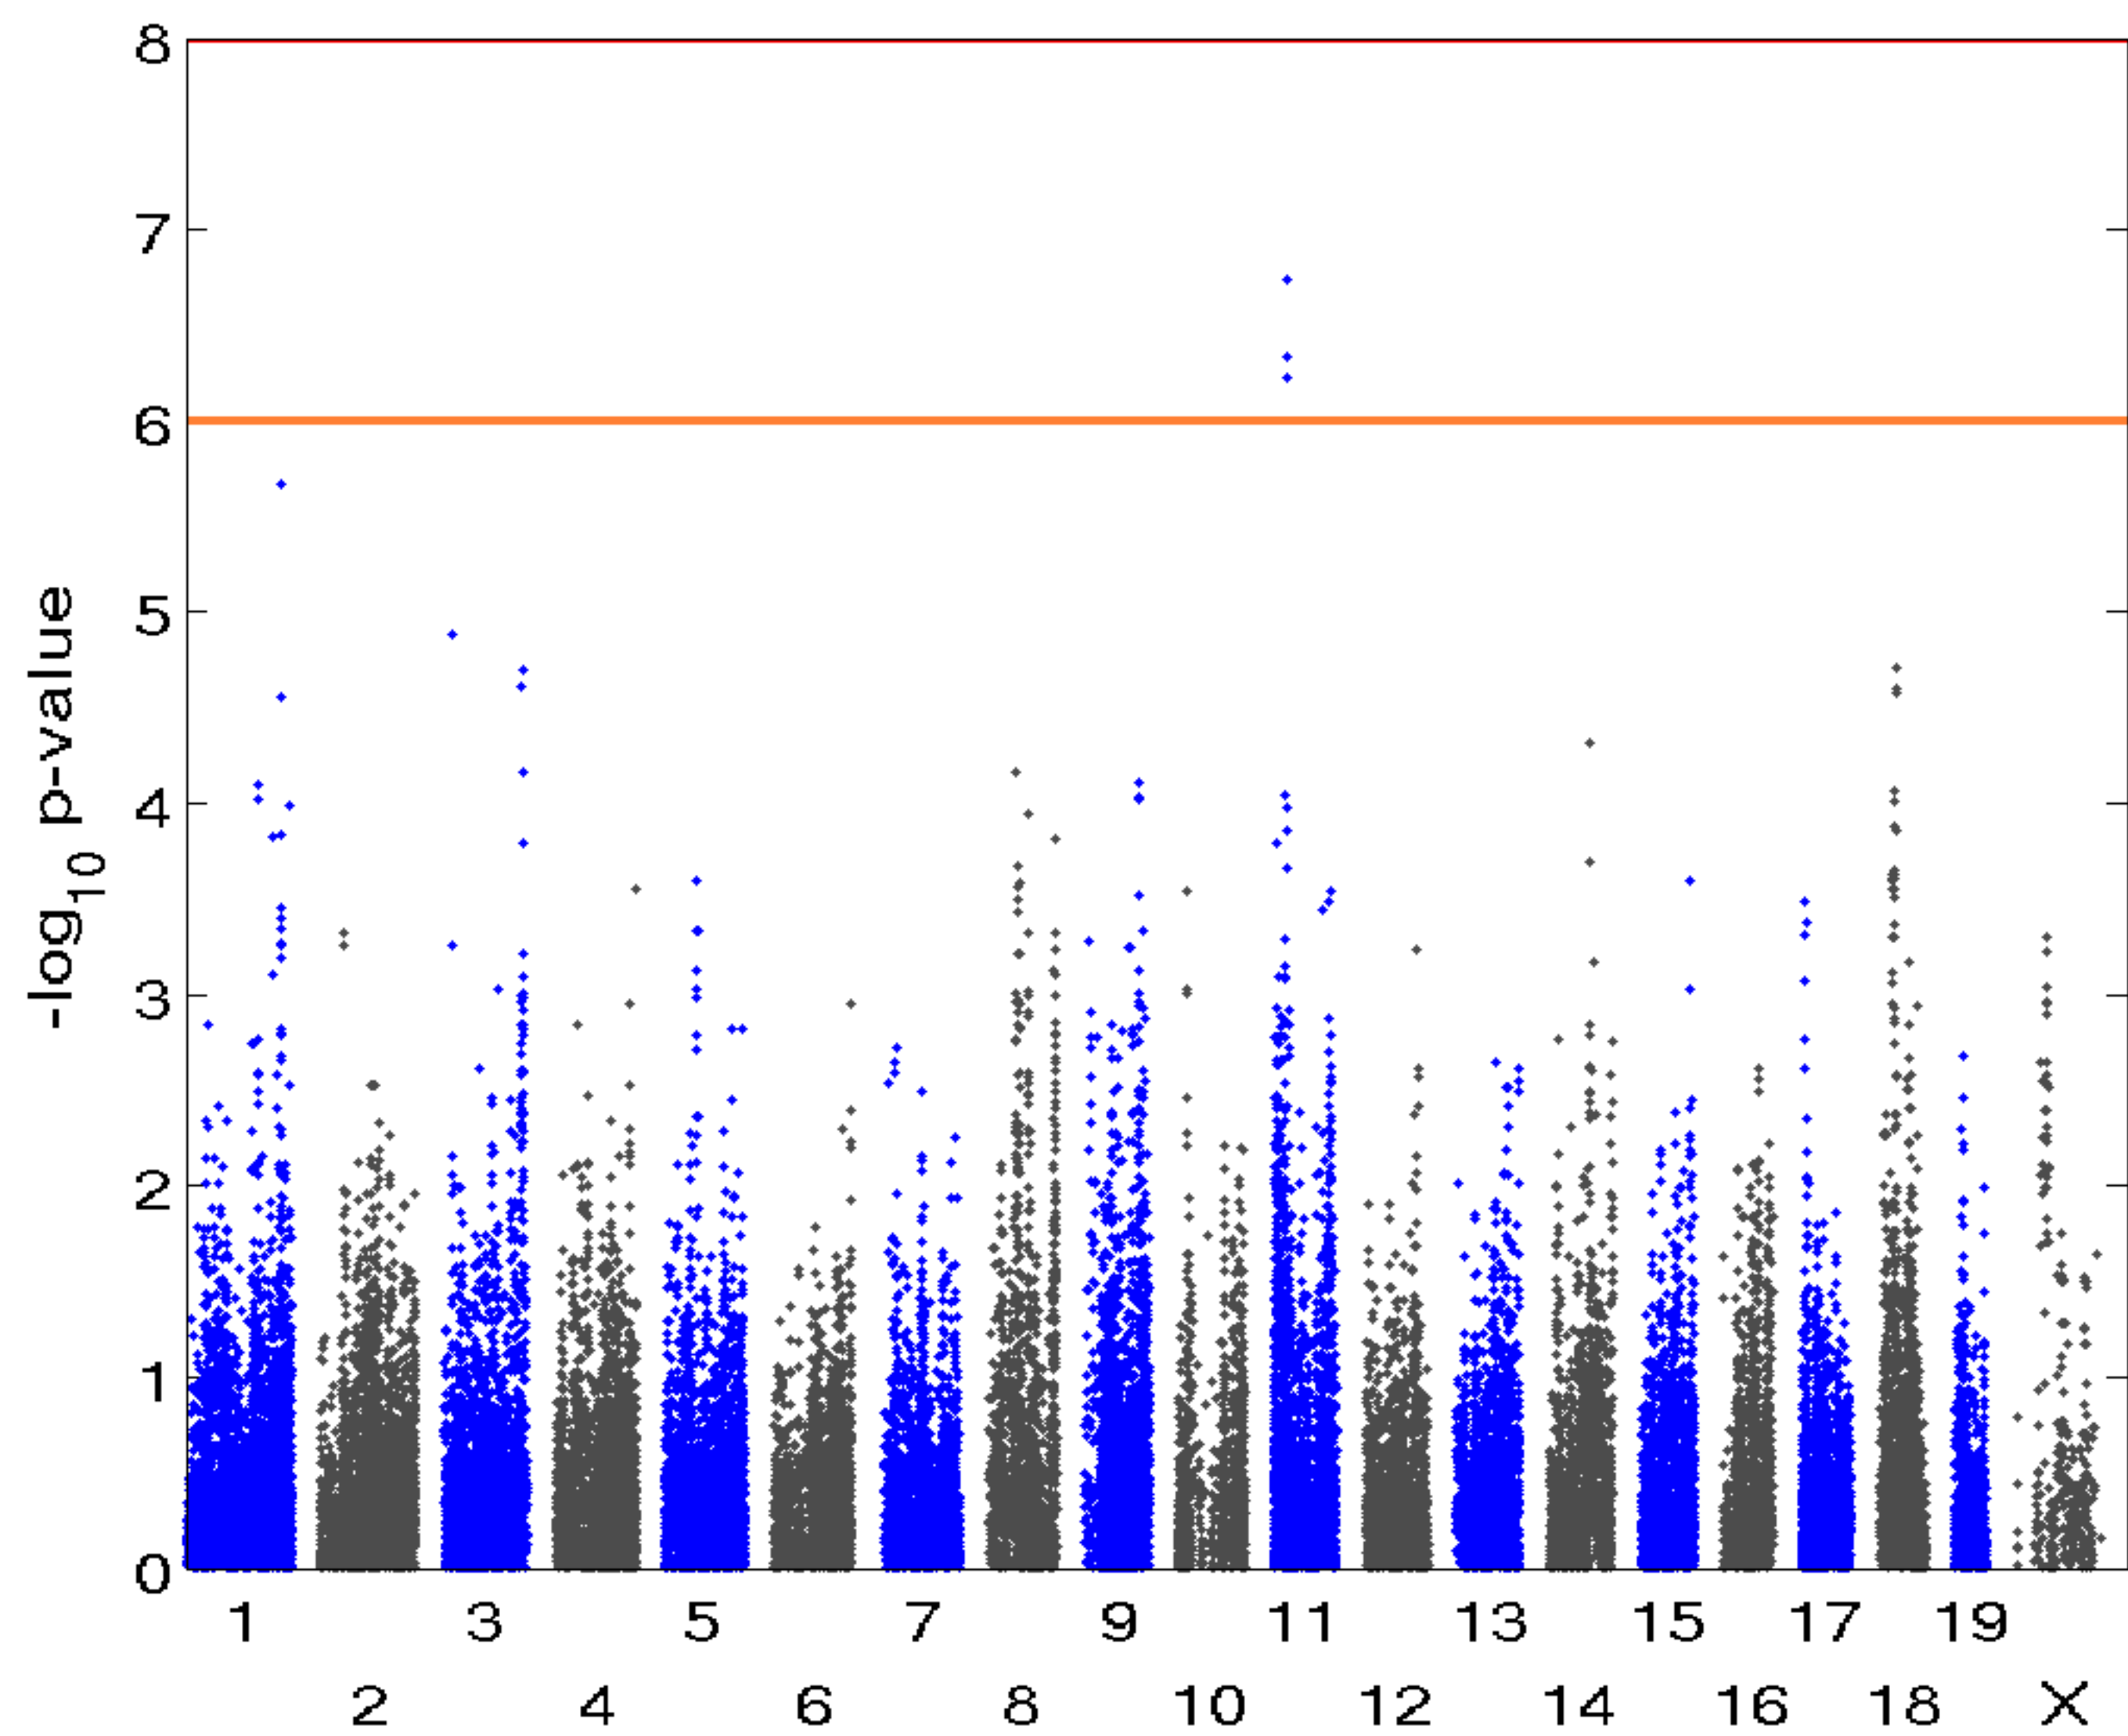

AW - iso10 vs ate

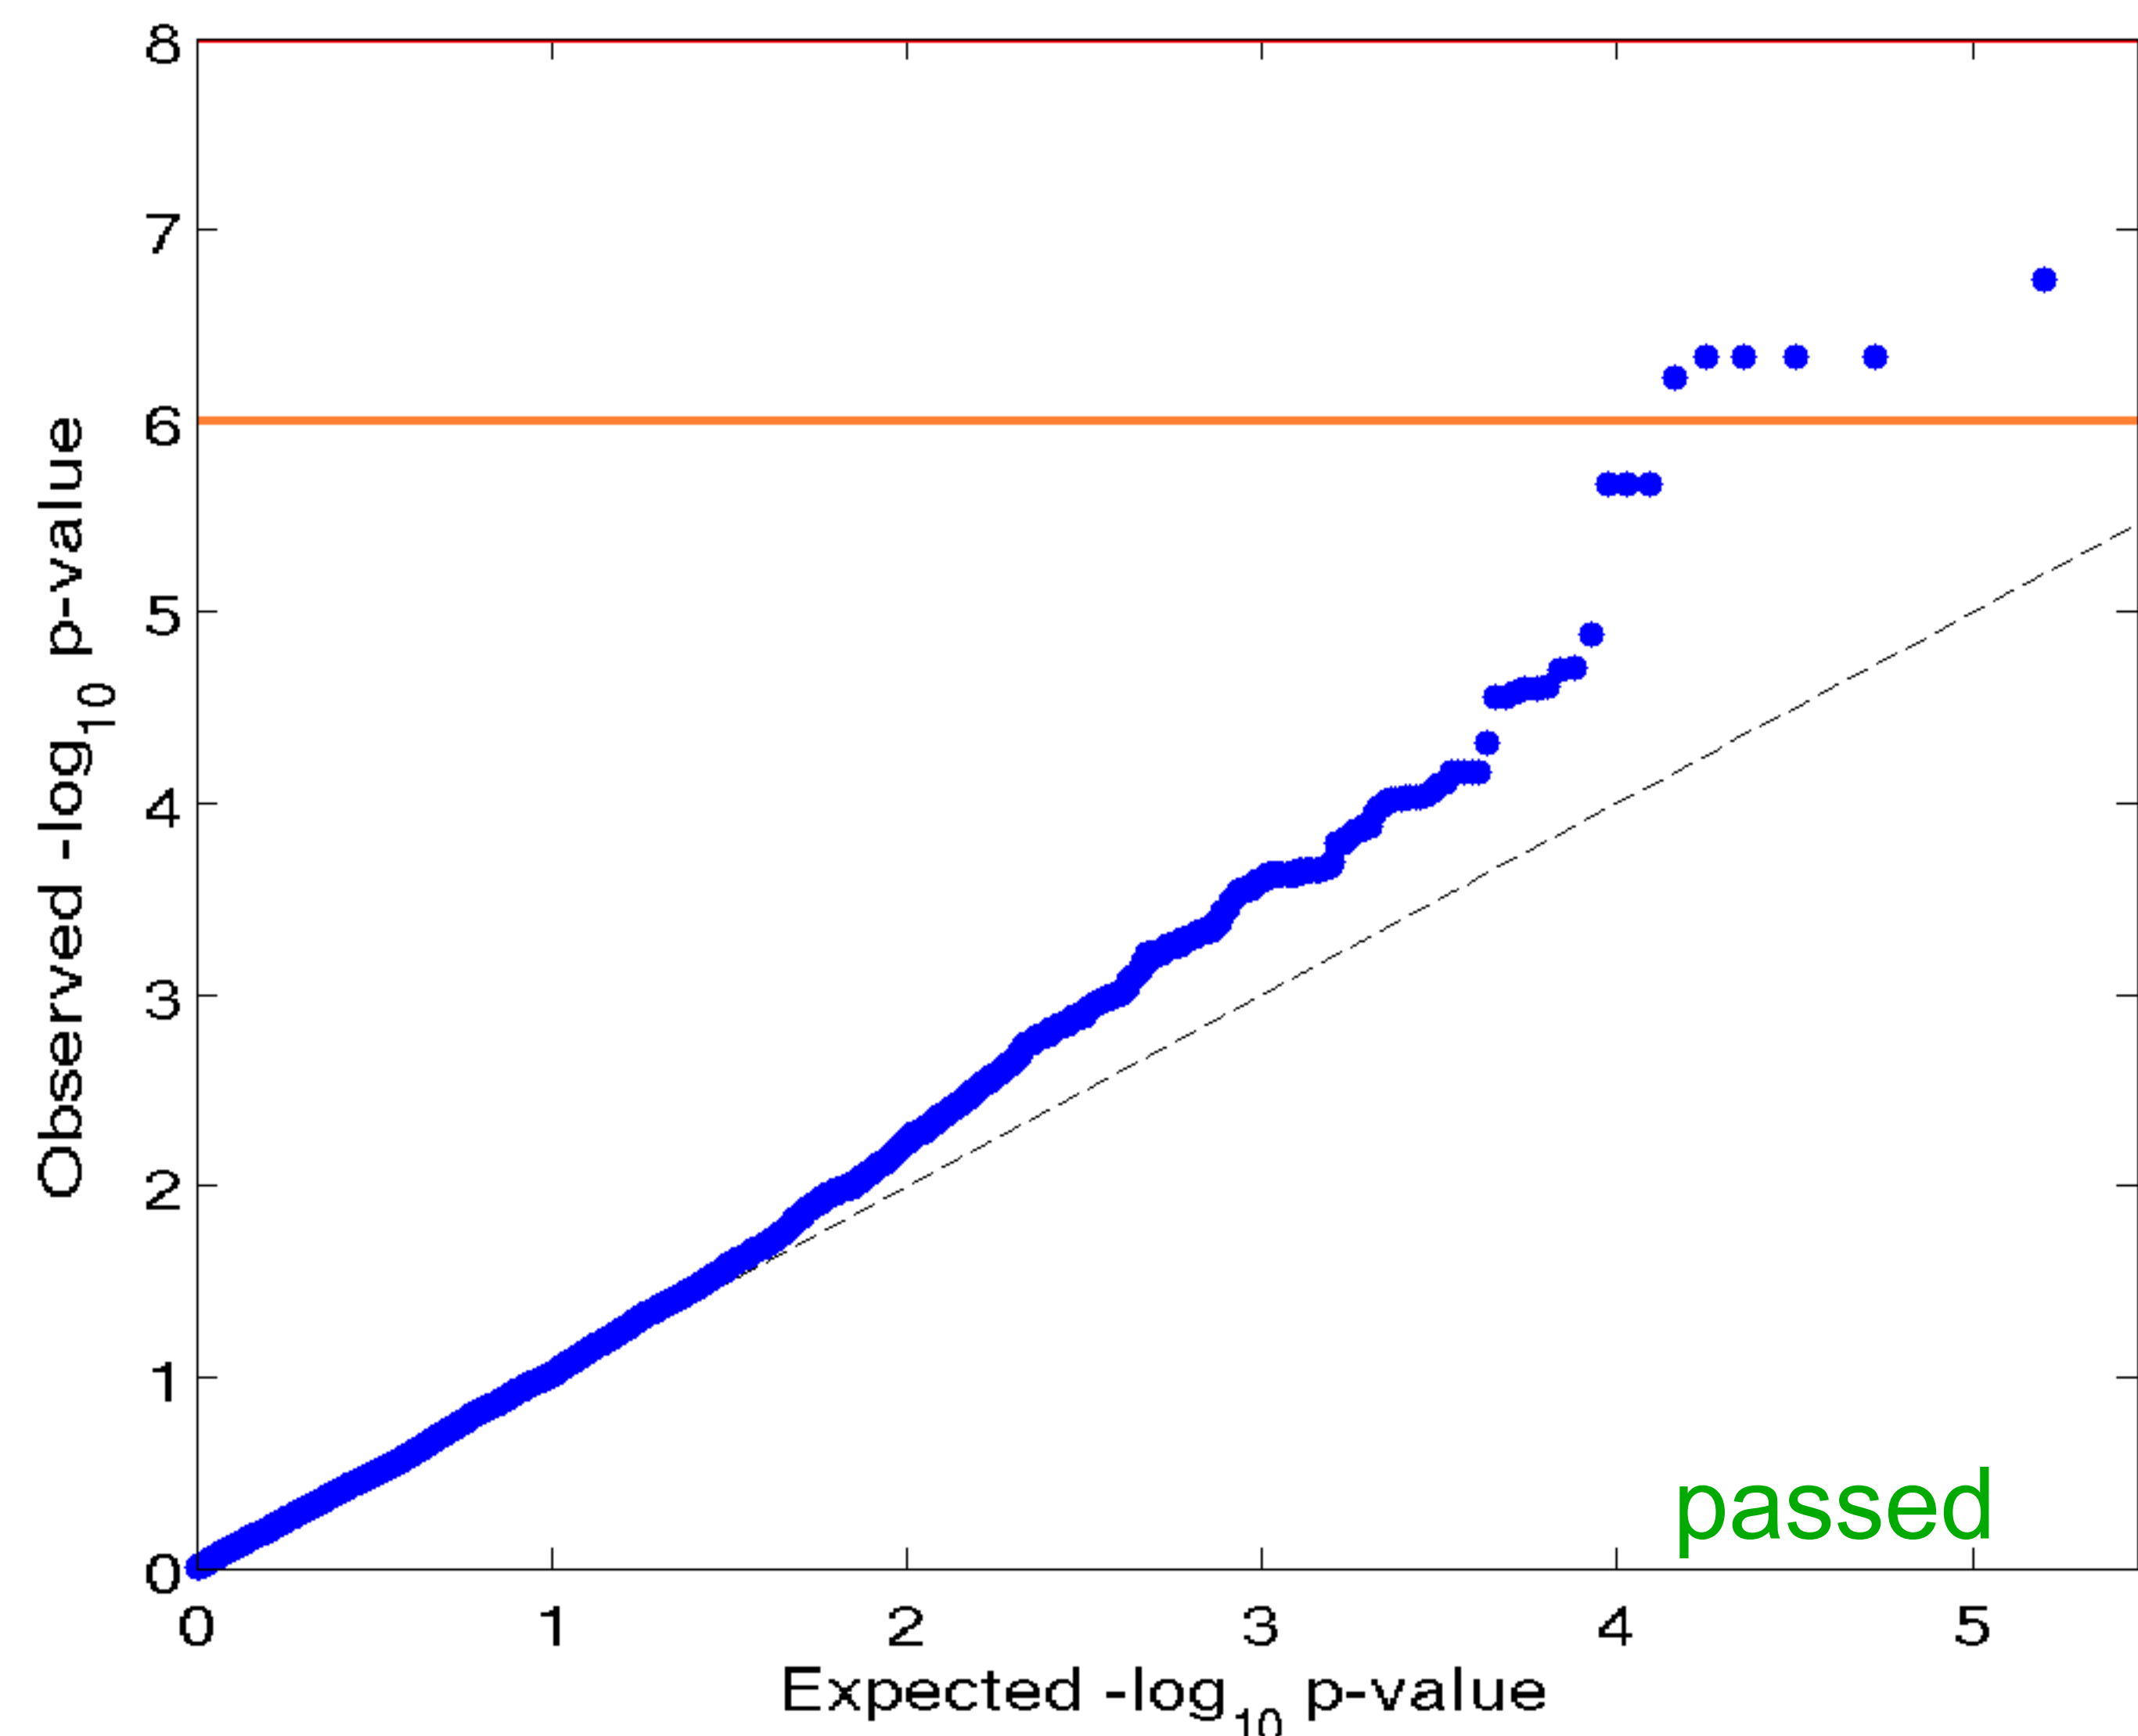

BWE - iso10 vs ate

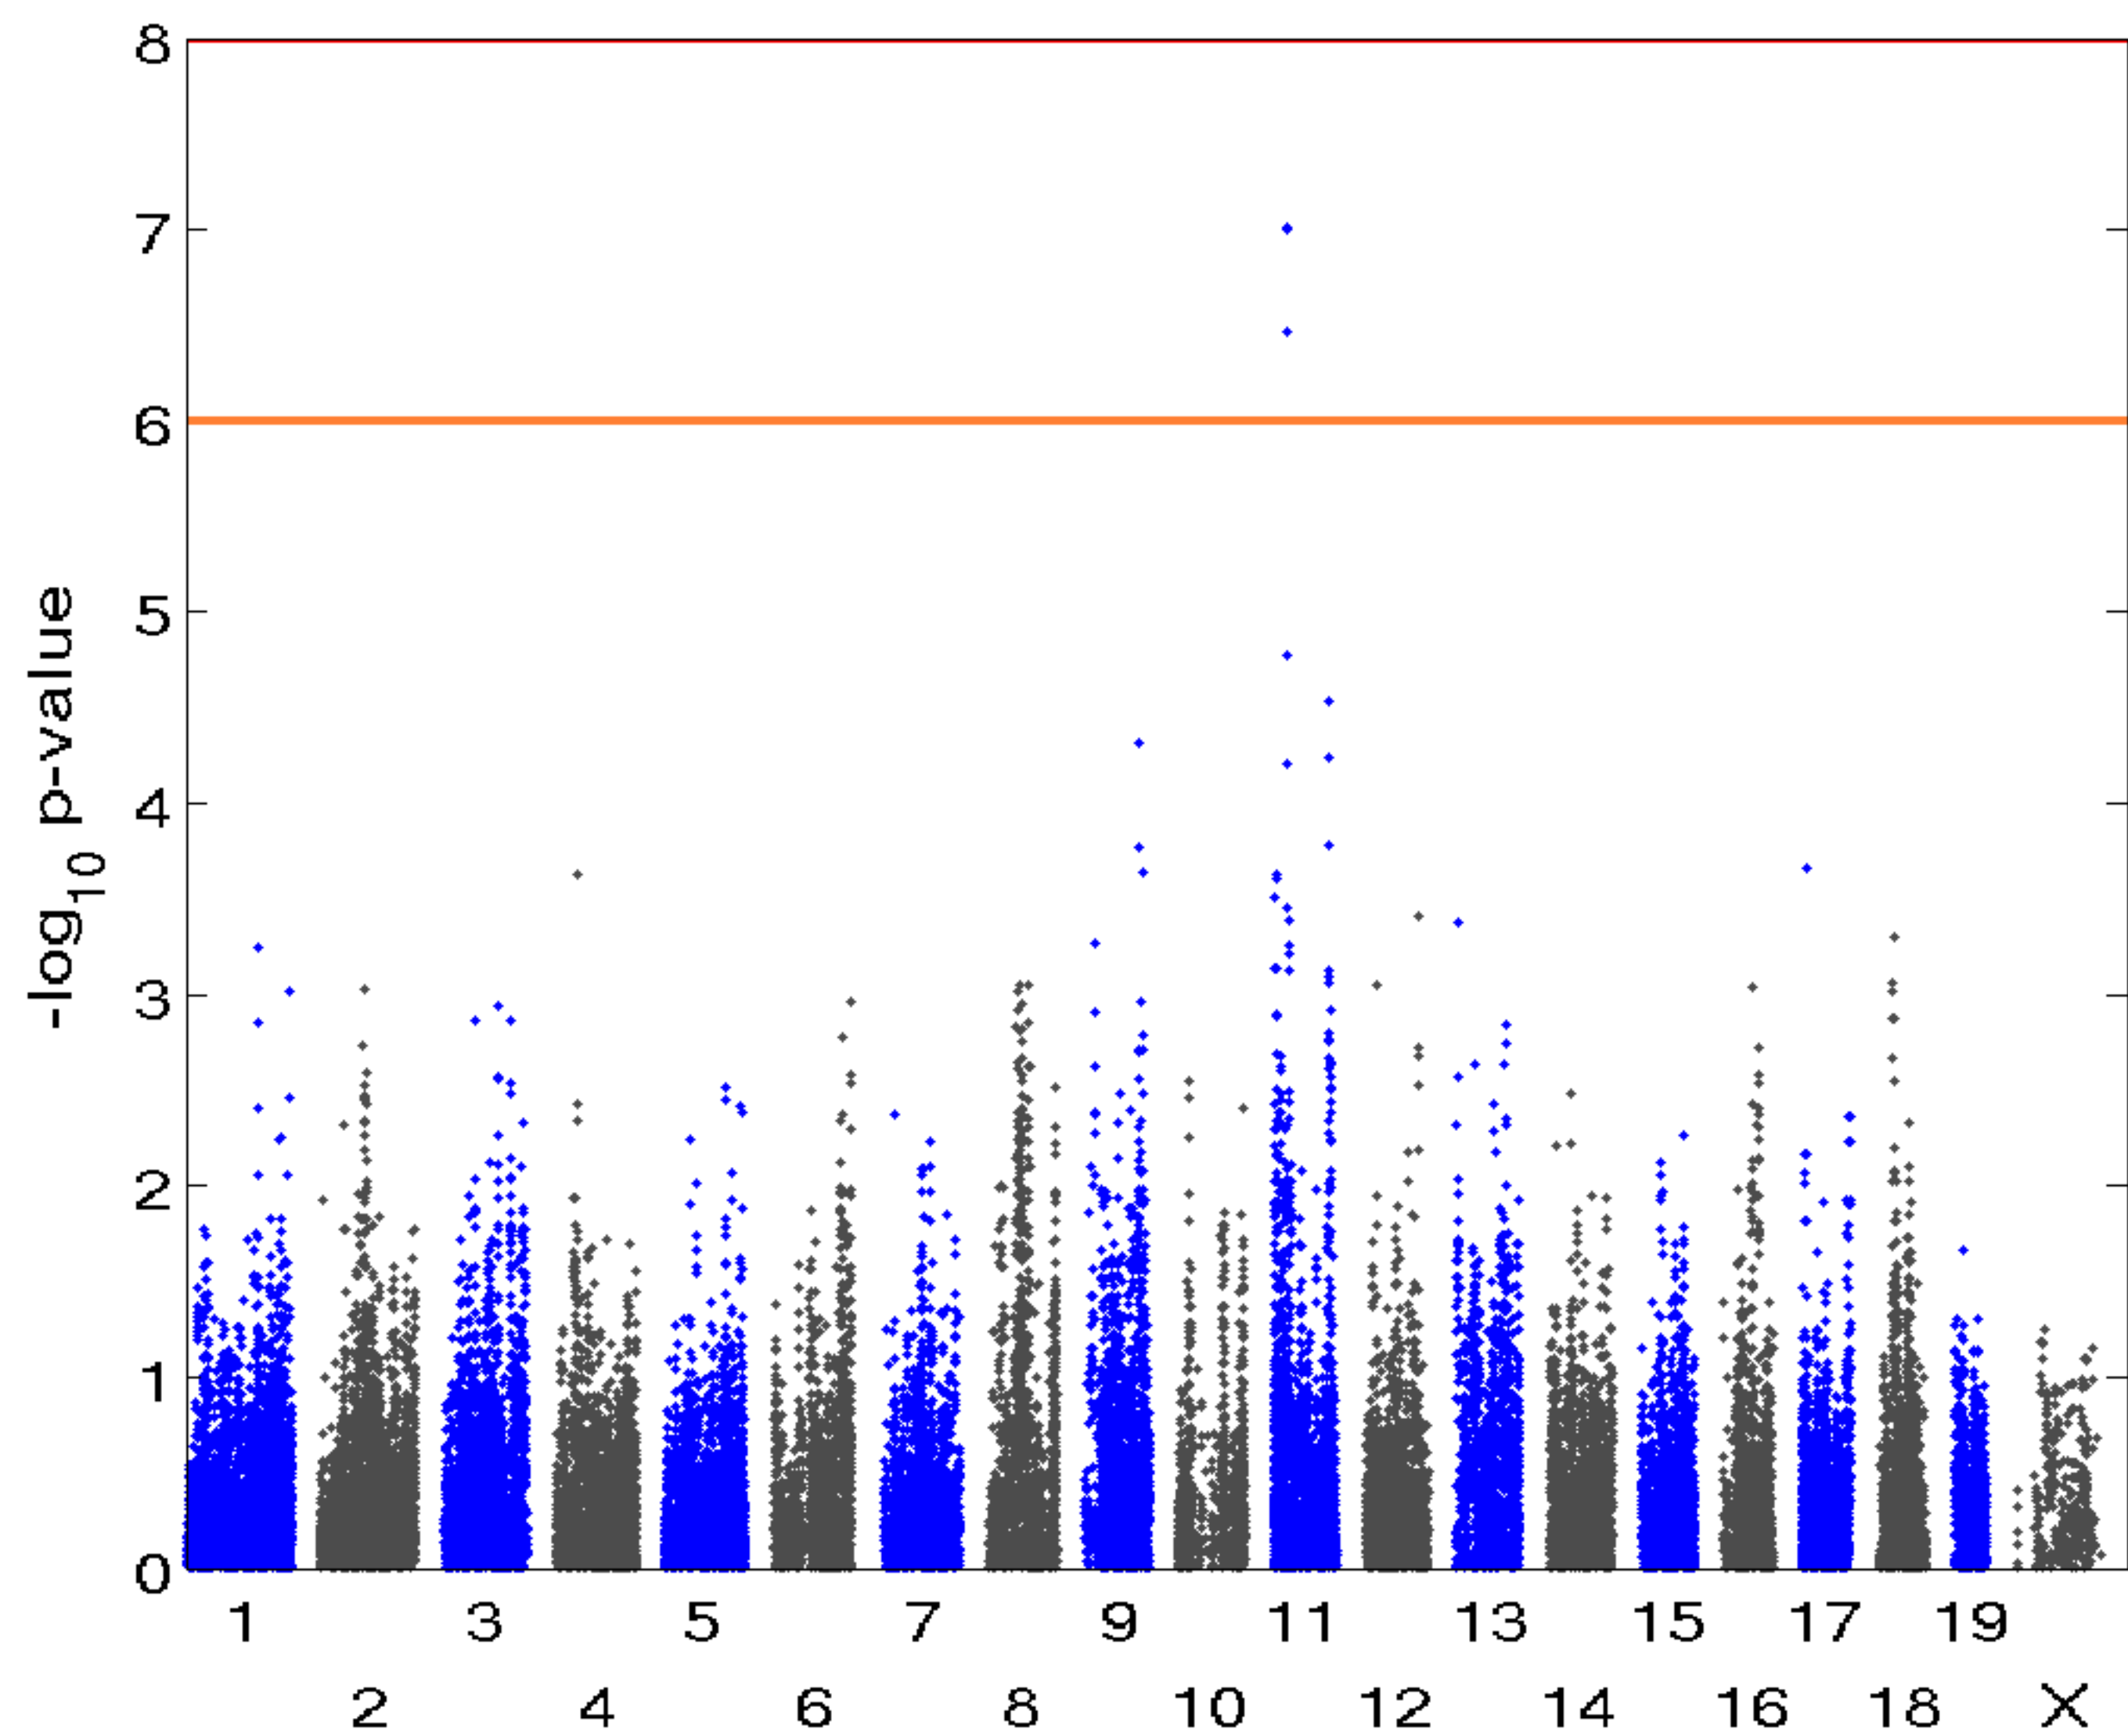

BWE - iso10 vs ate

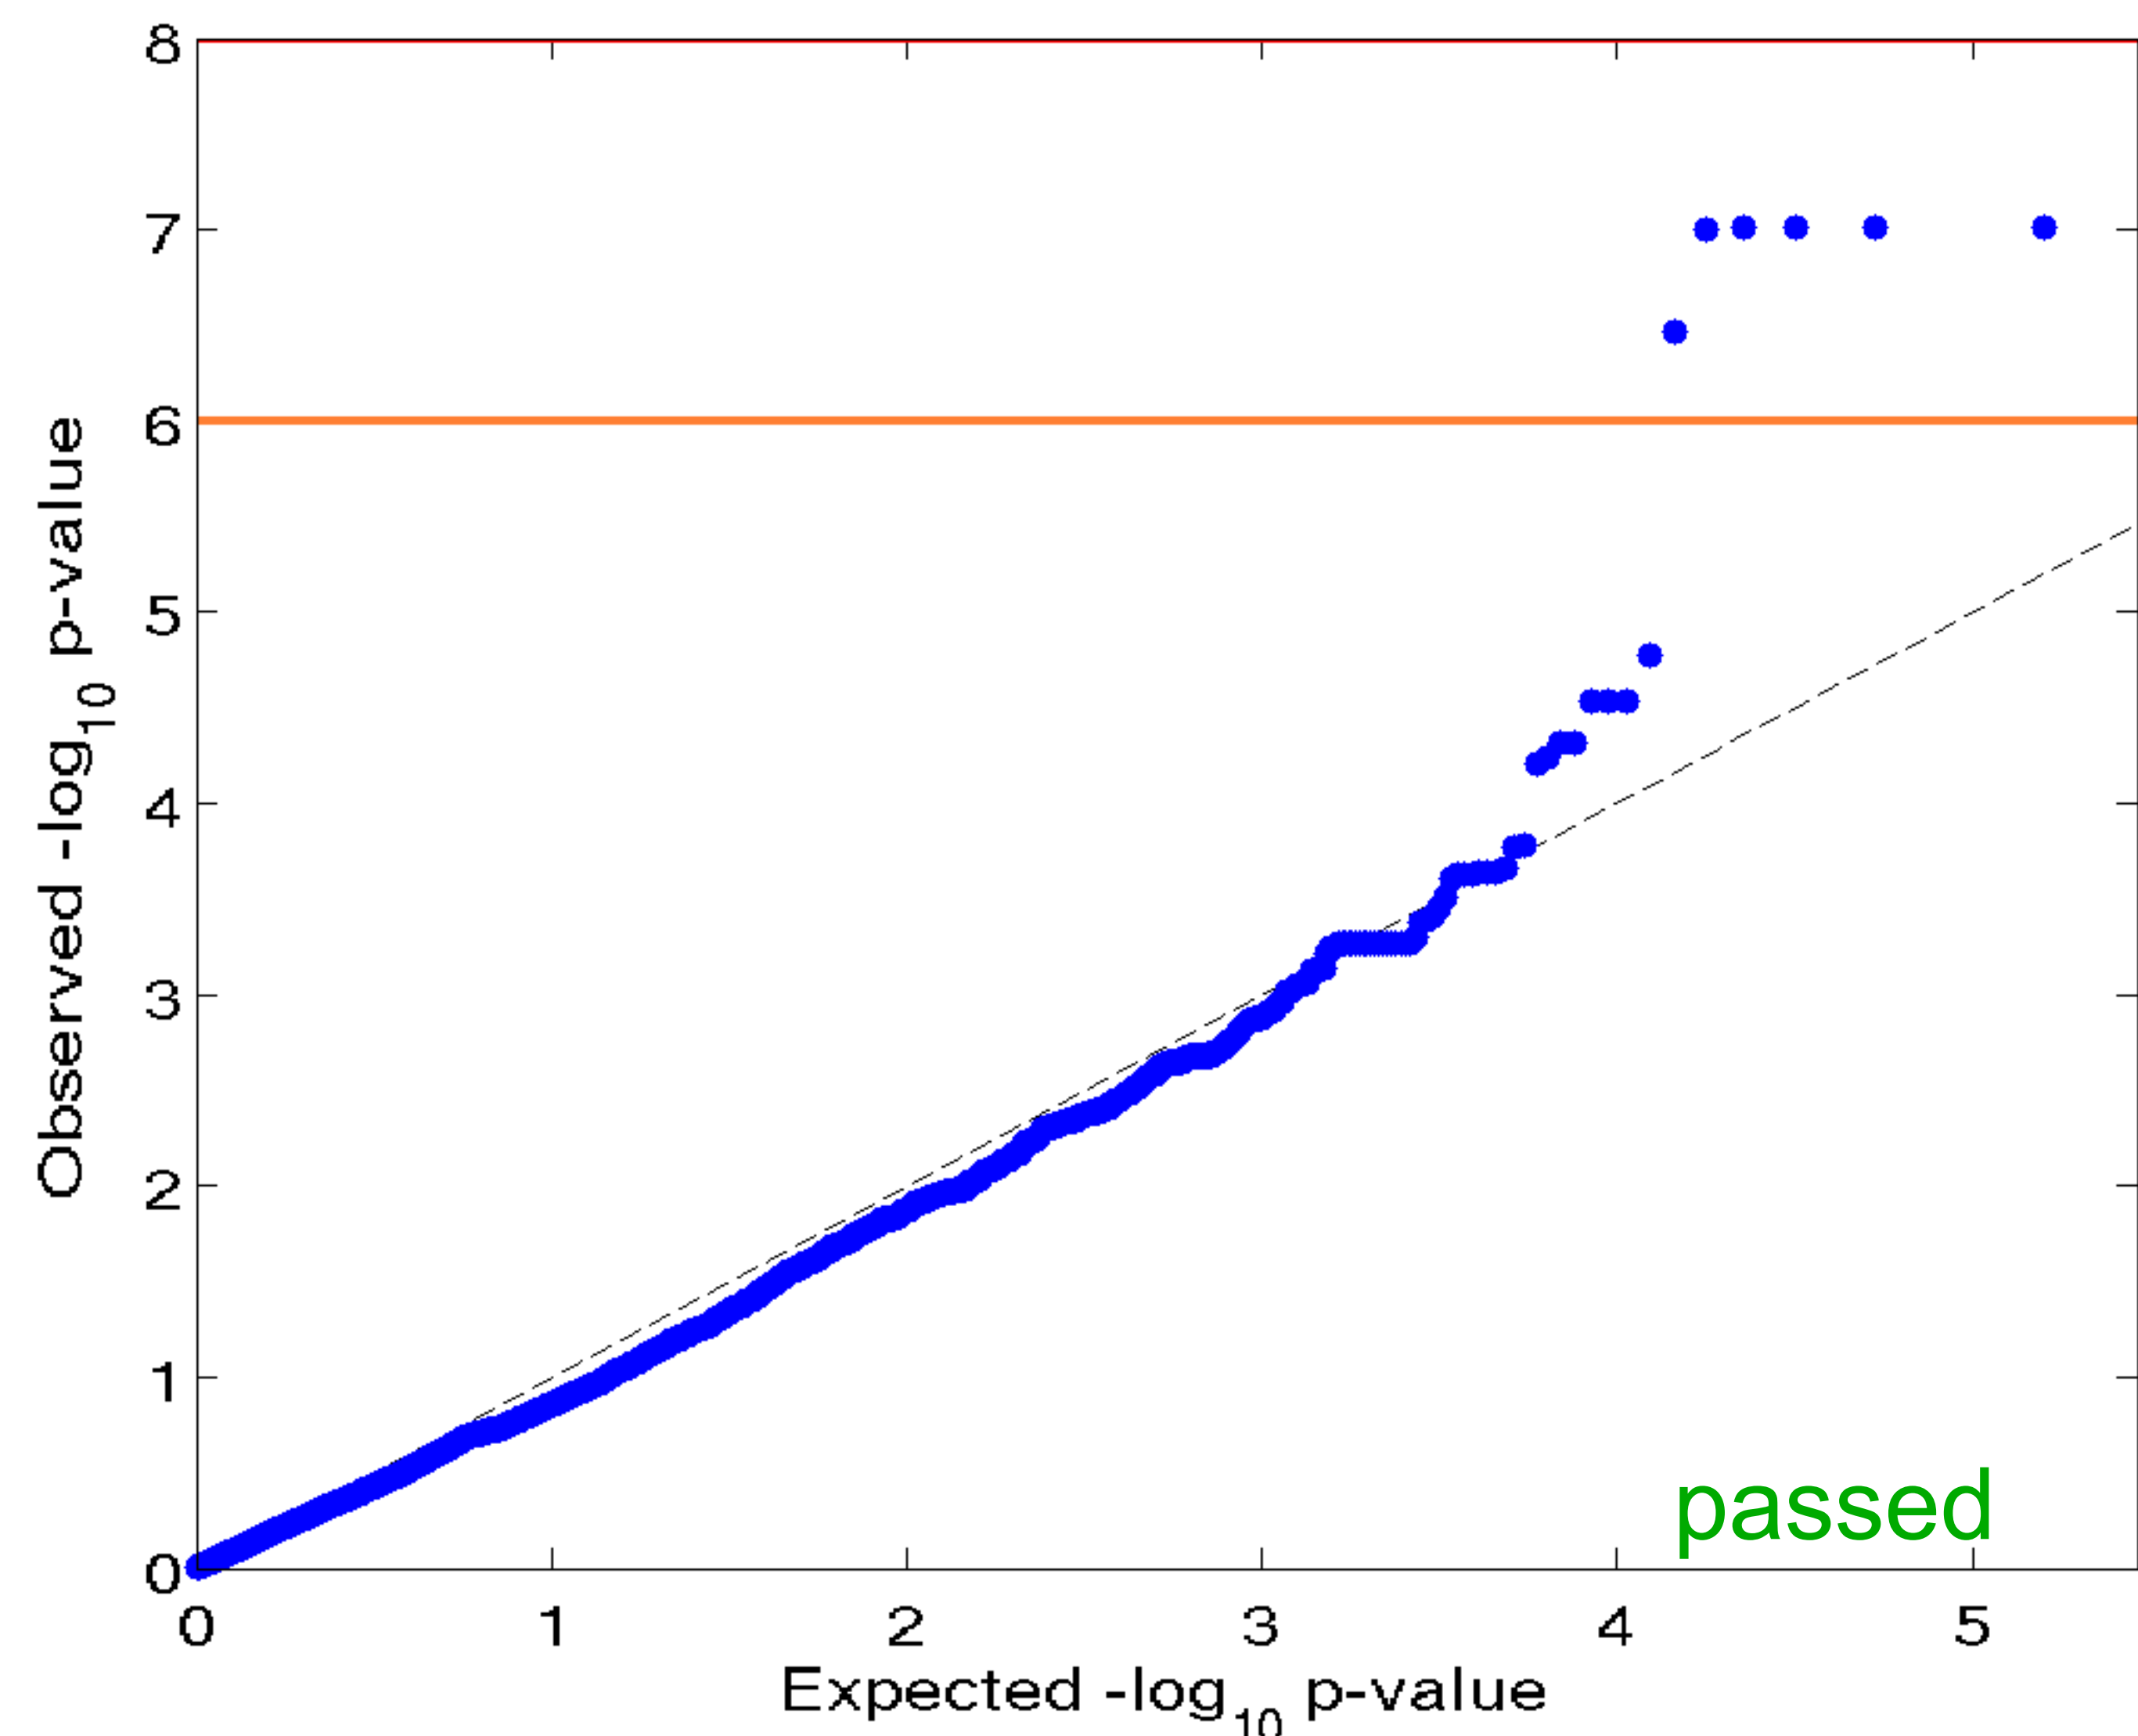



HR-ECG - iso10 vs ate

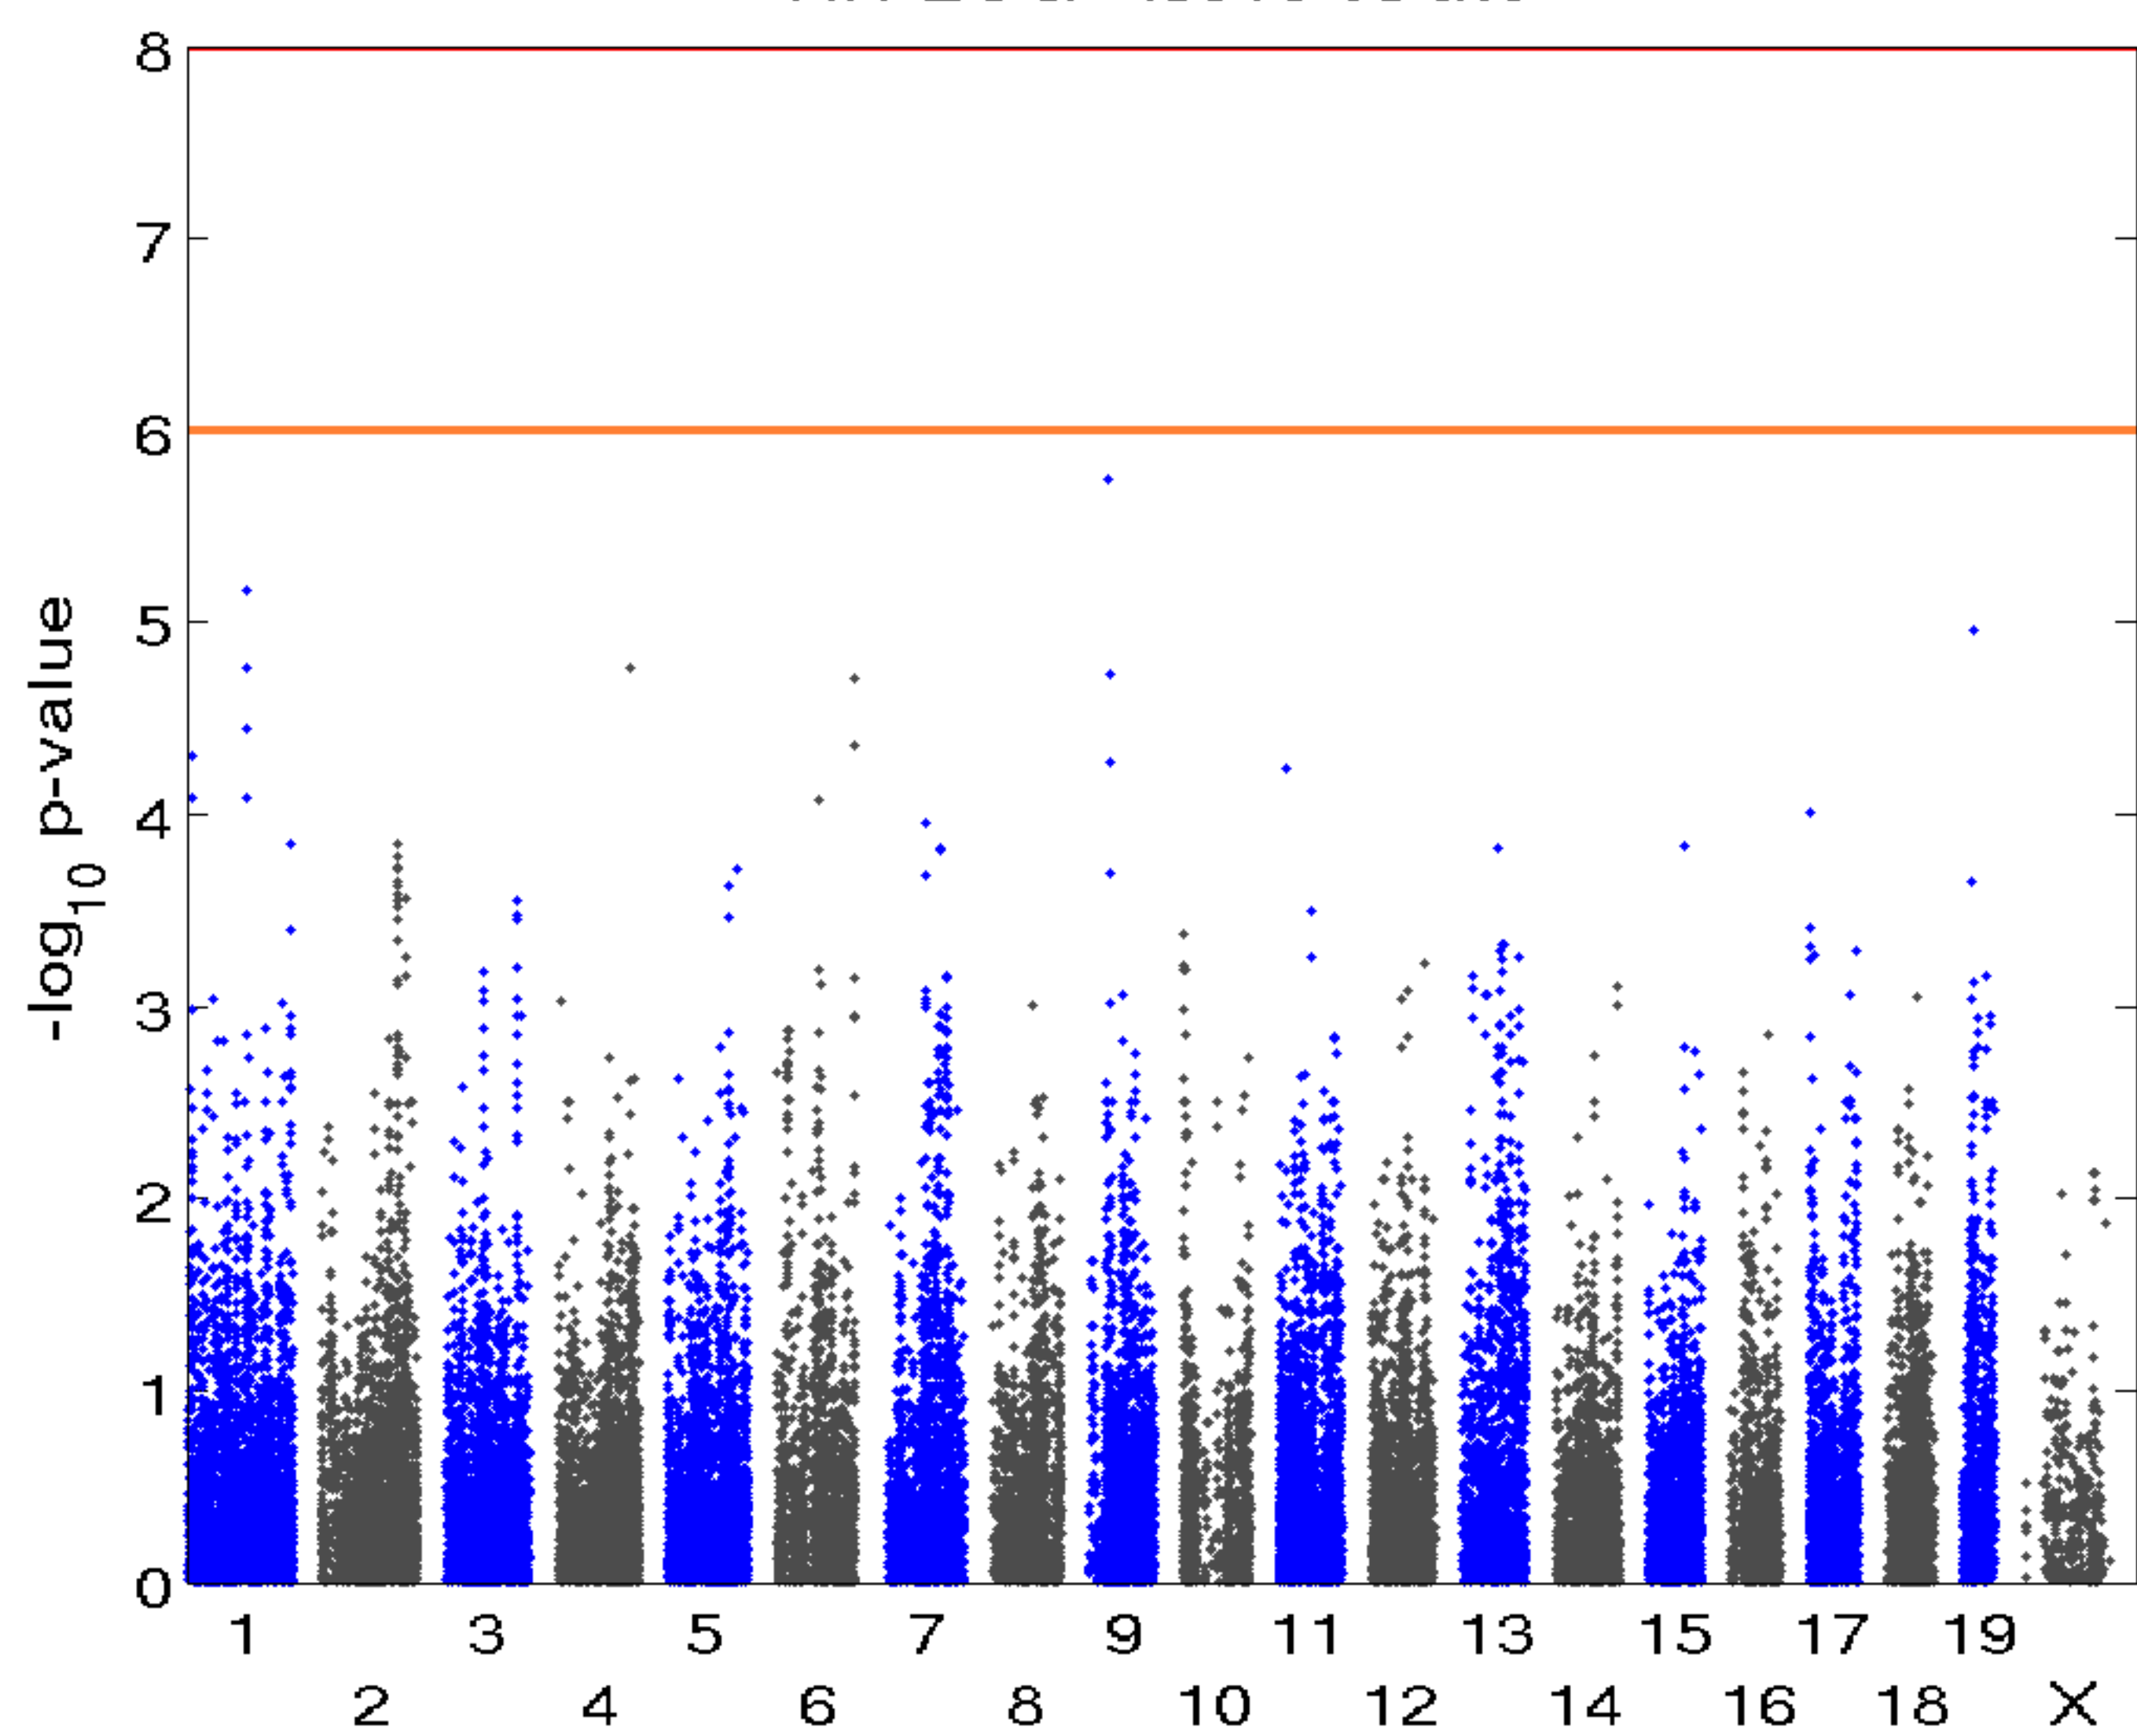

HR-ECG - iso10 vs ate

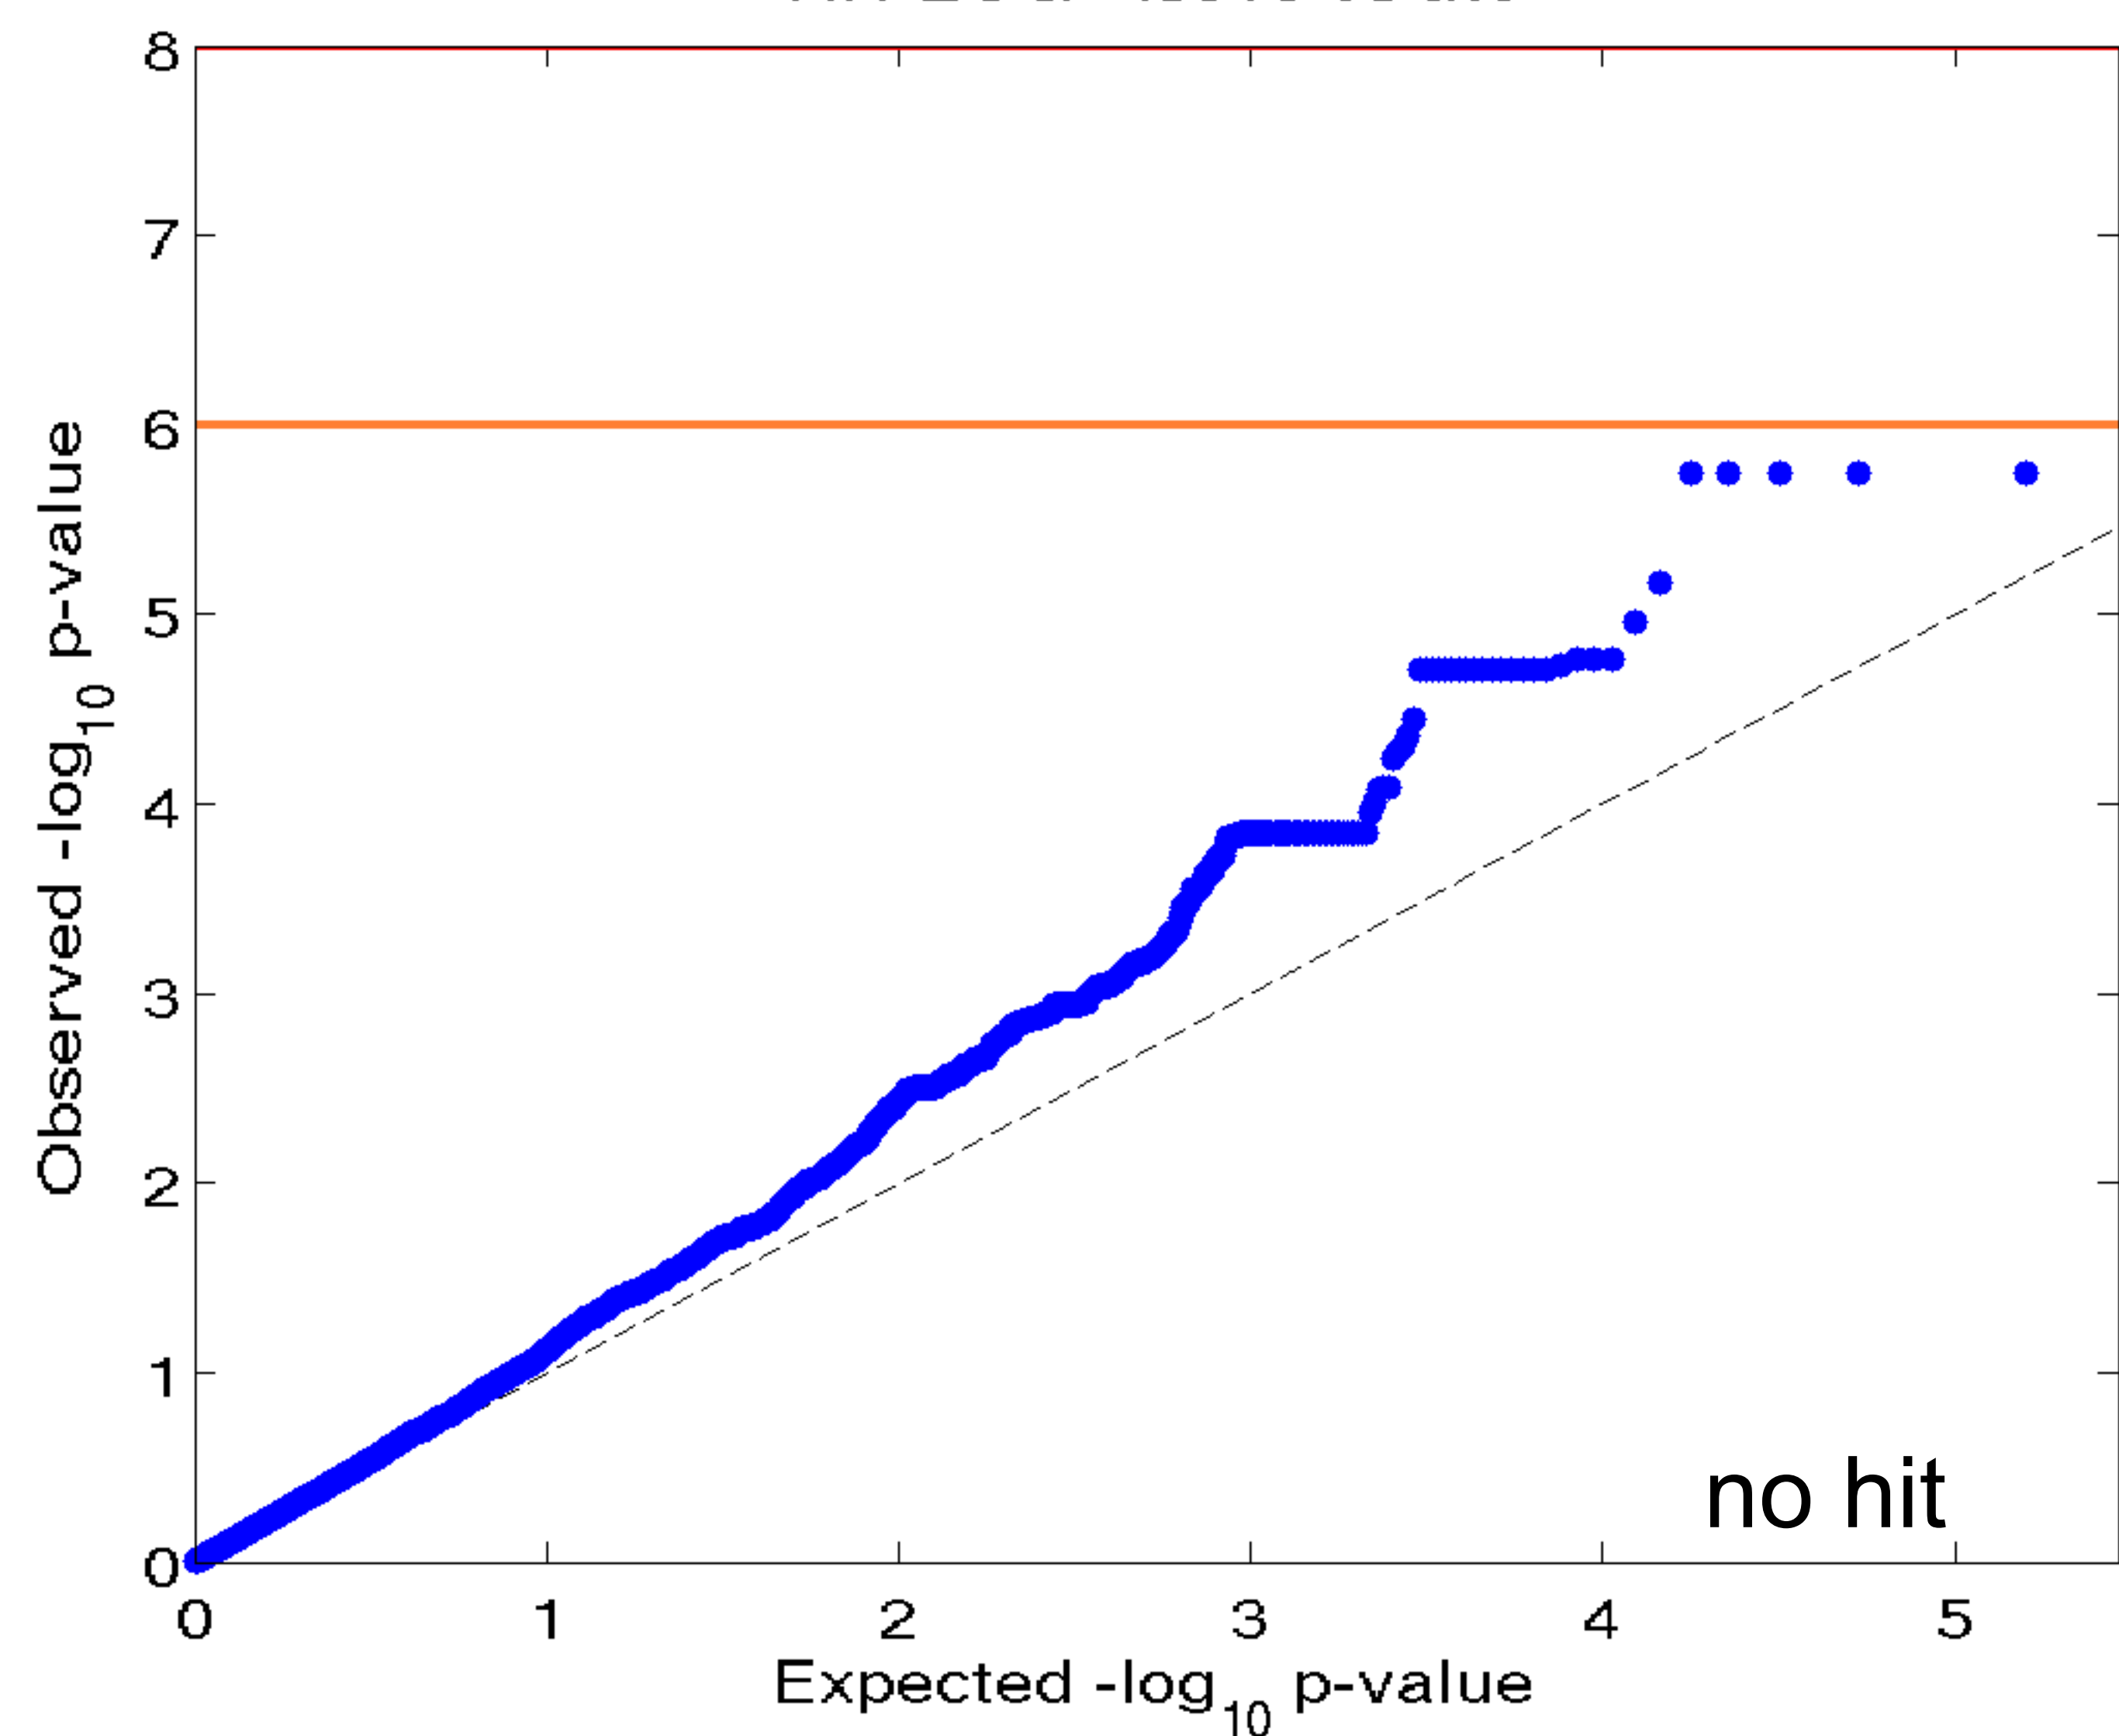

HR-TC - iso10 vs ate

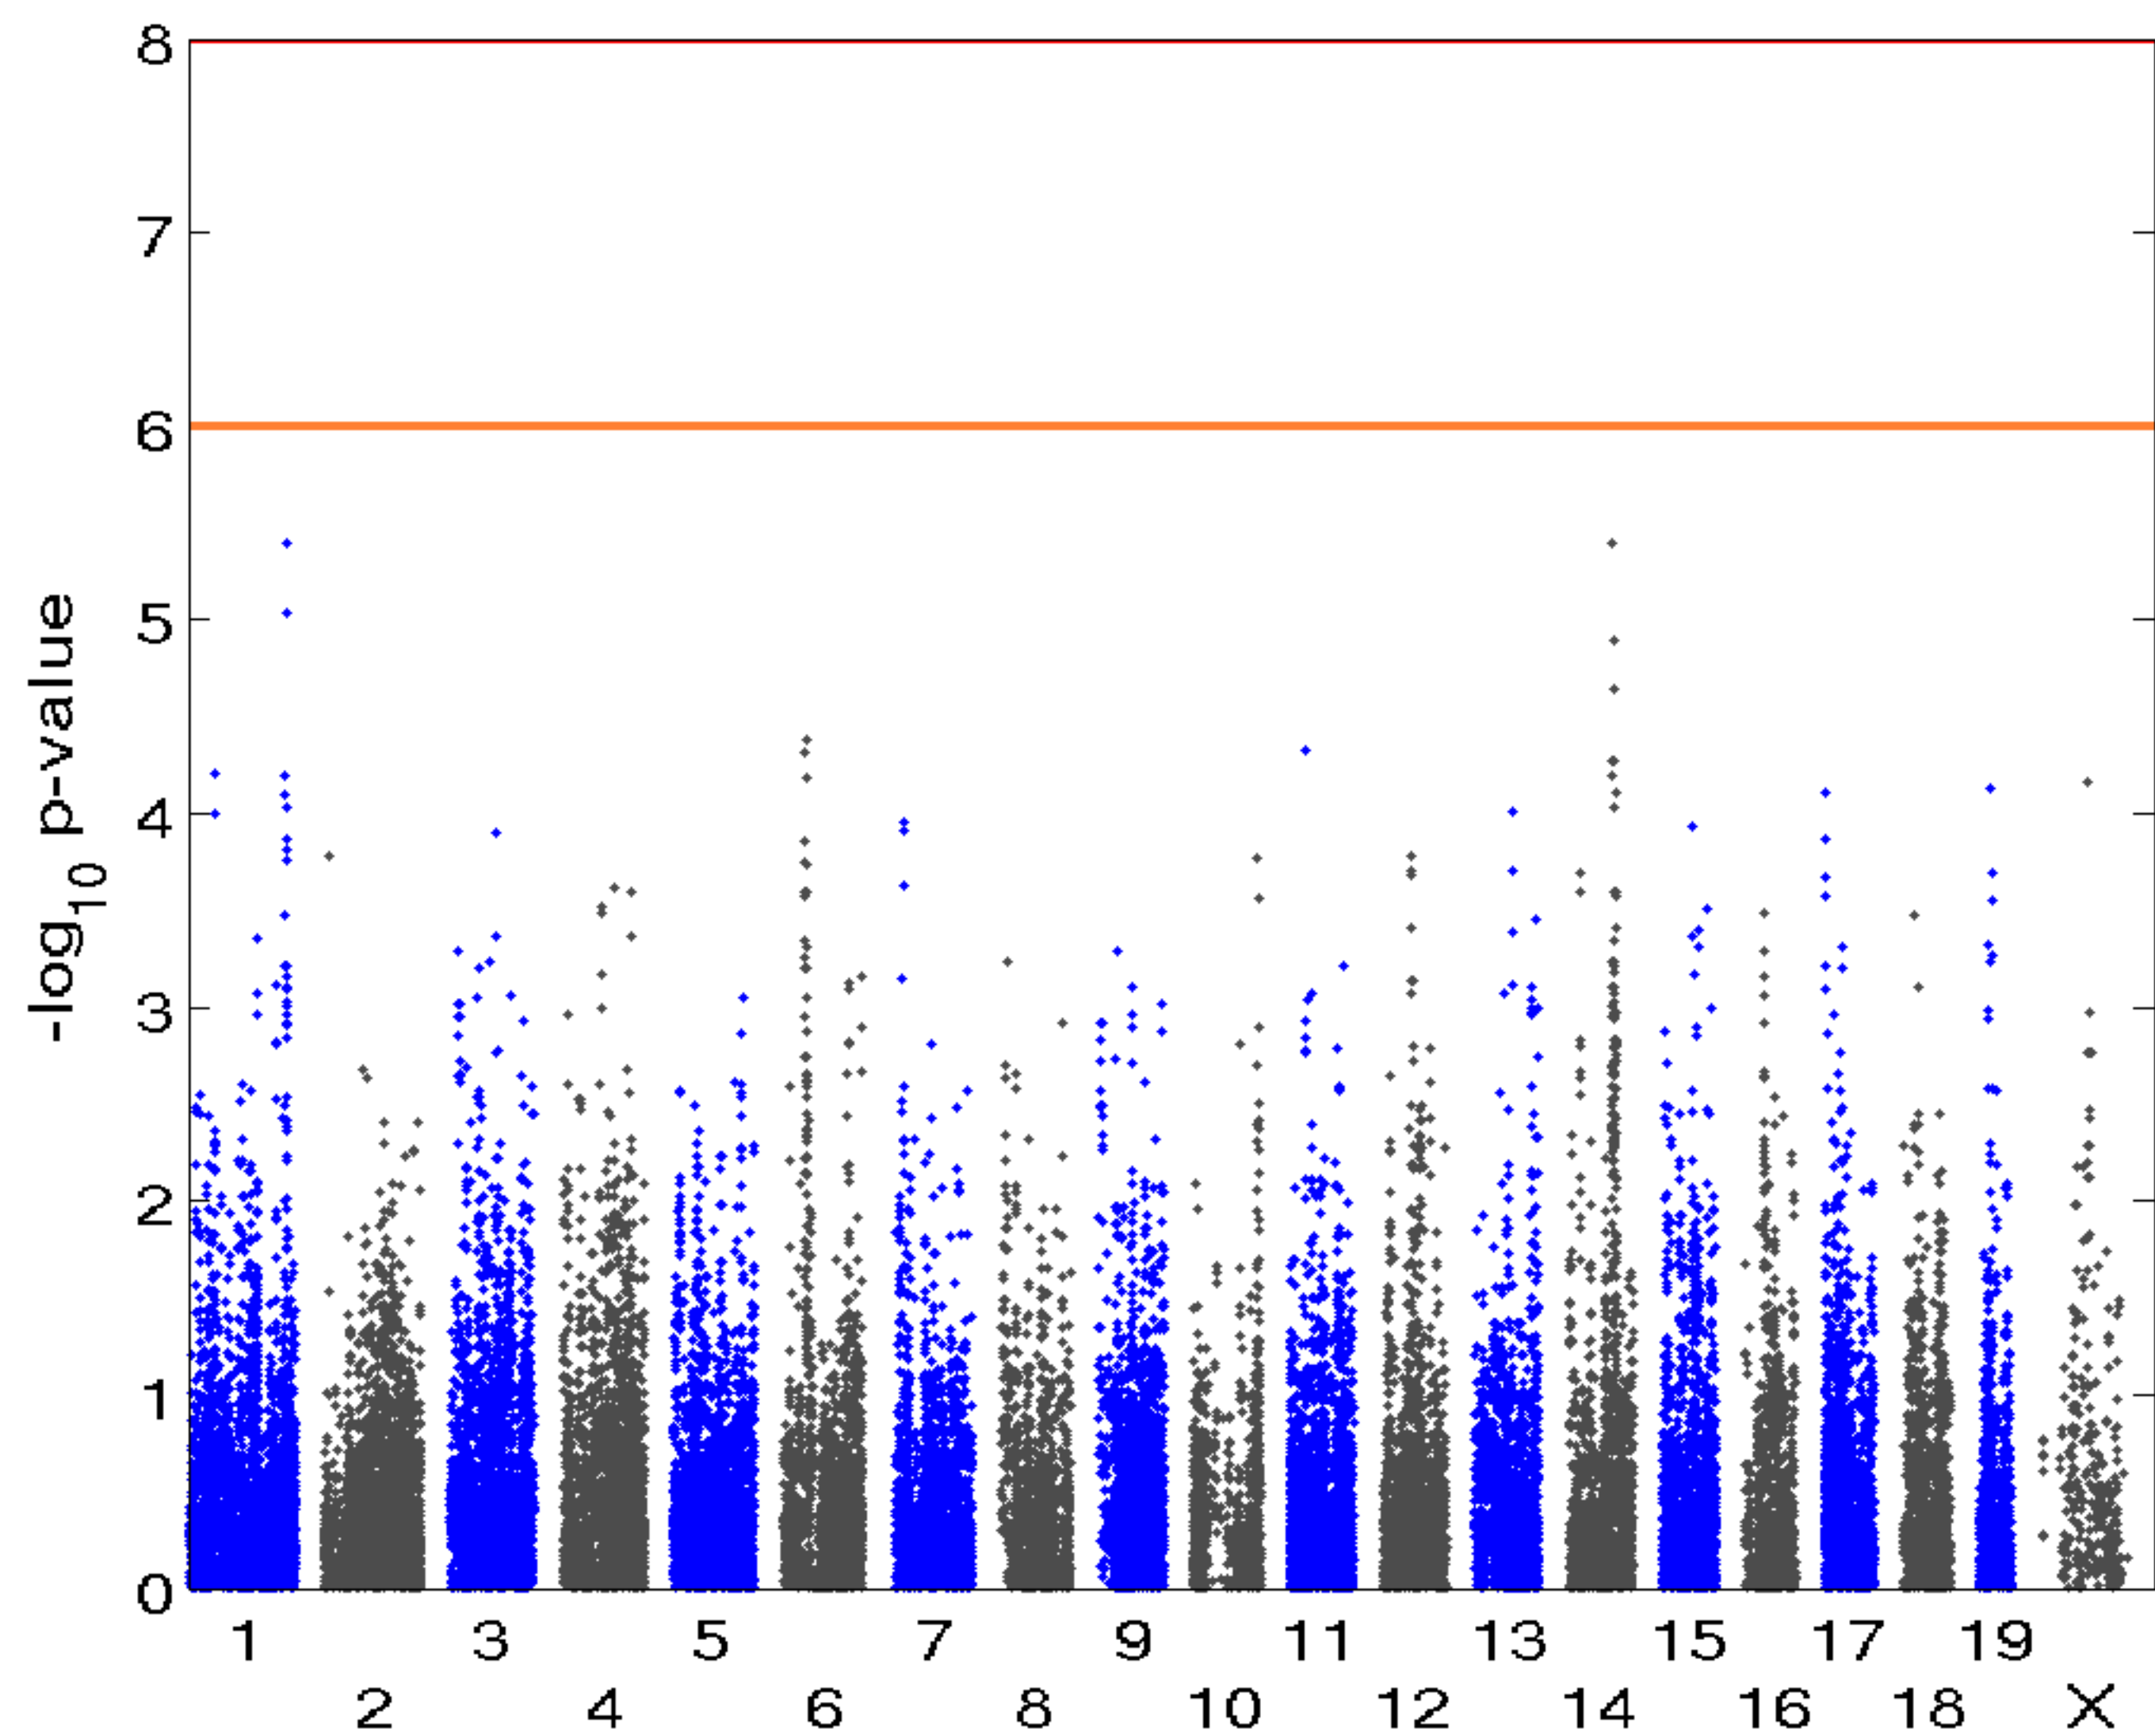

HR-TC - iso10 vs ate

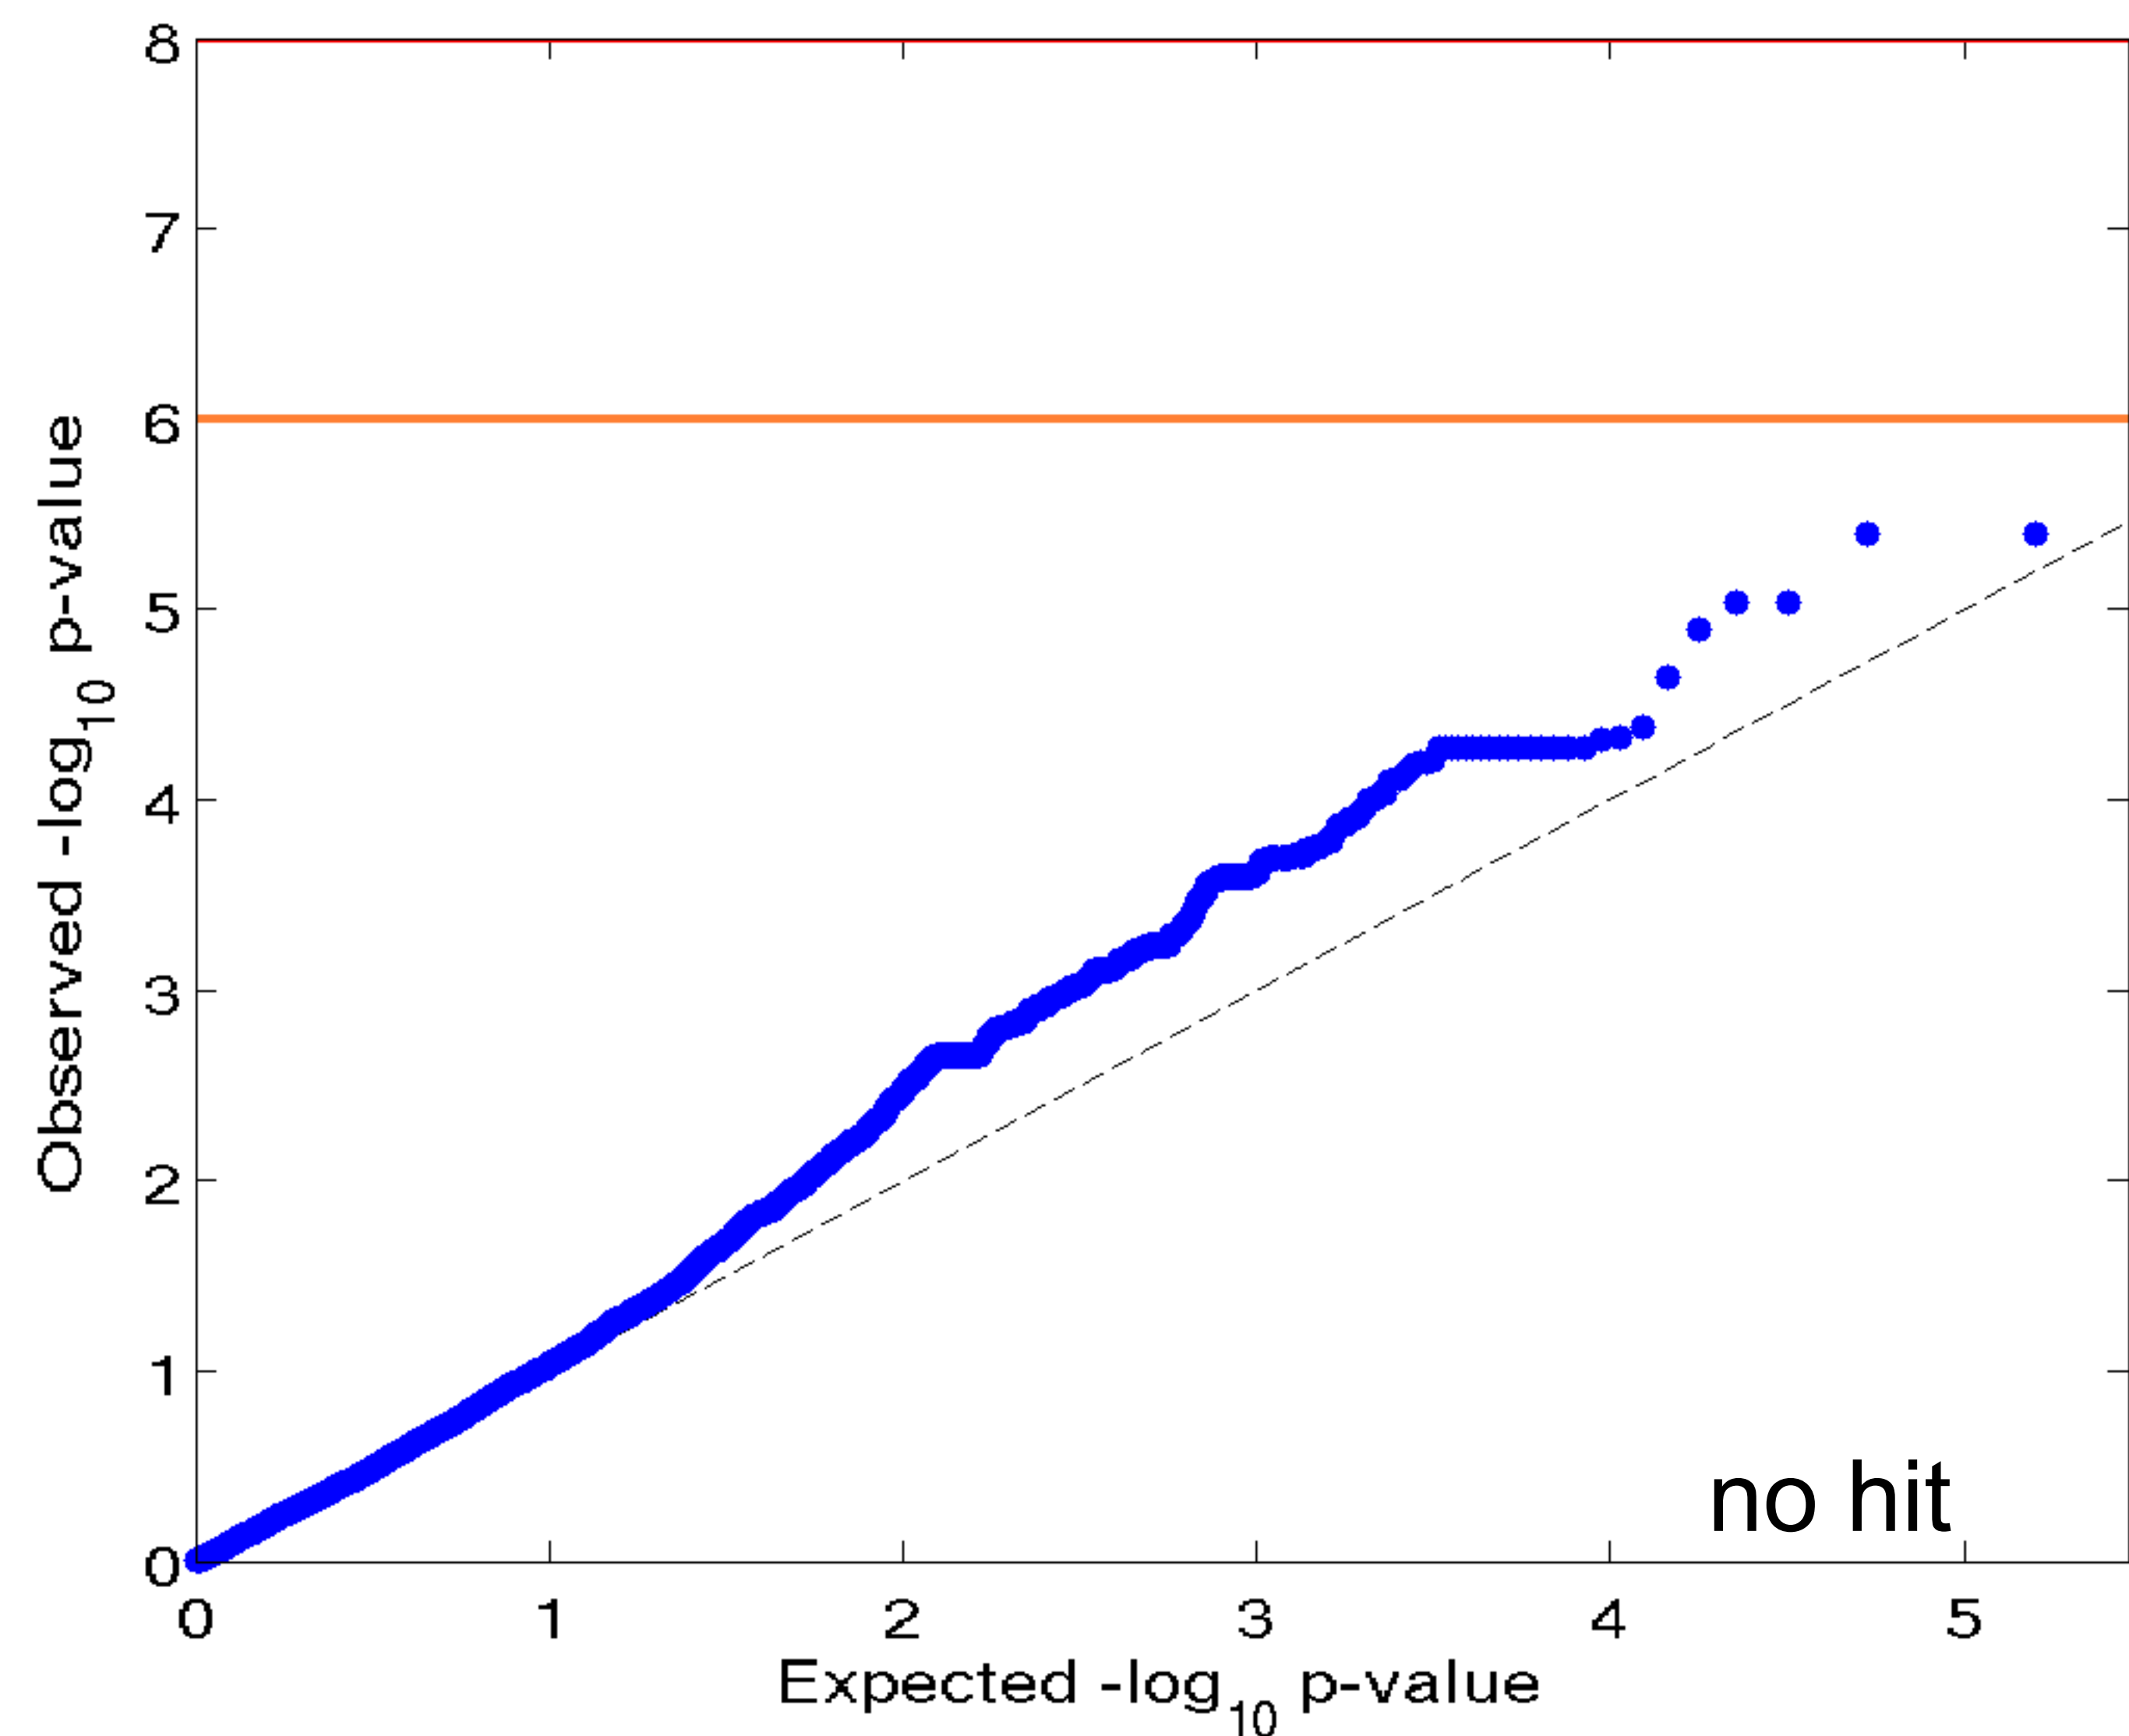

HW - iso10 vs ate

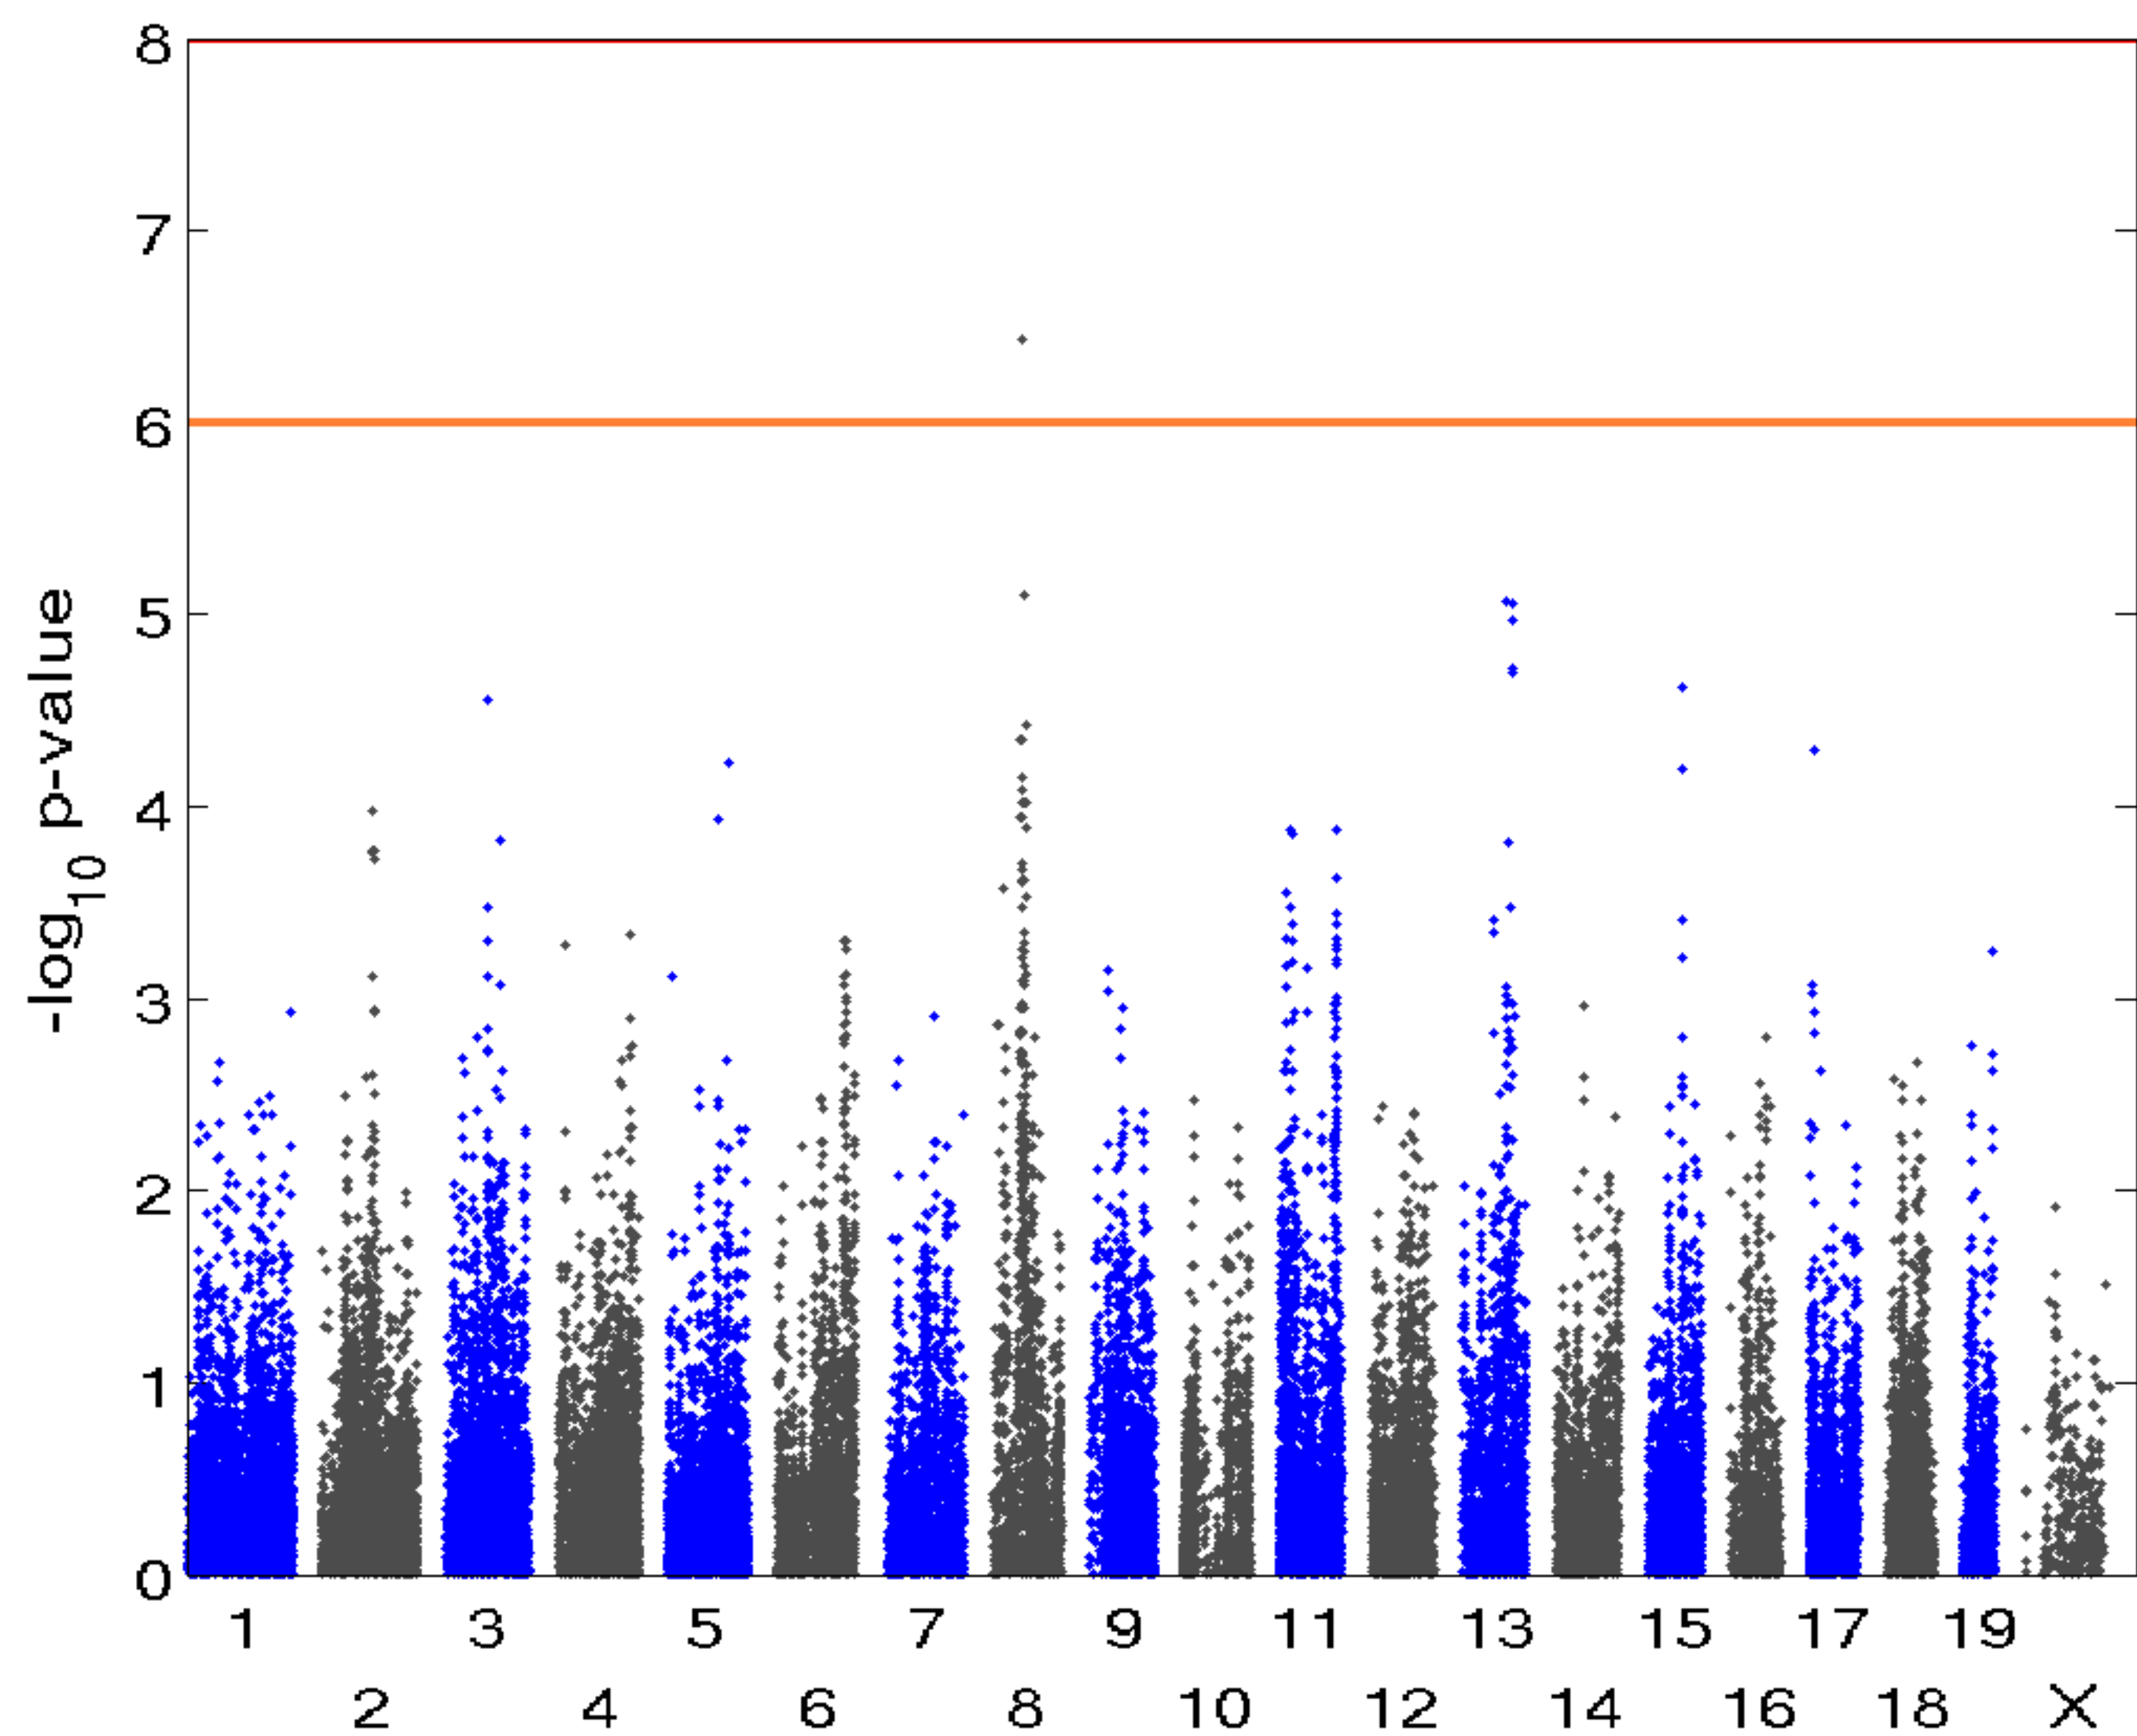

HW - iso10 vs ate

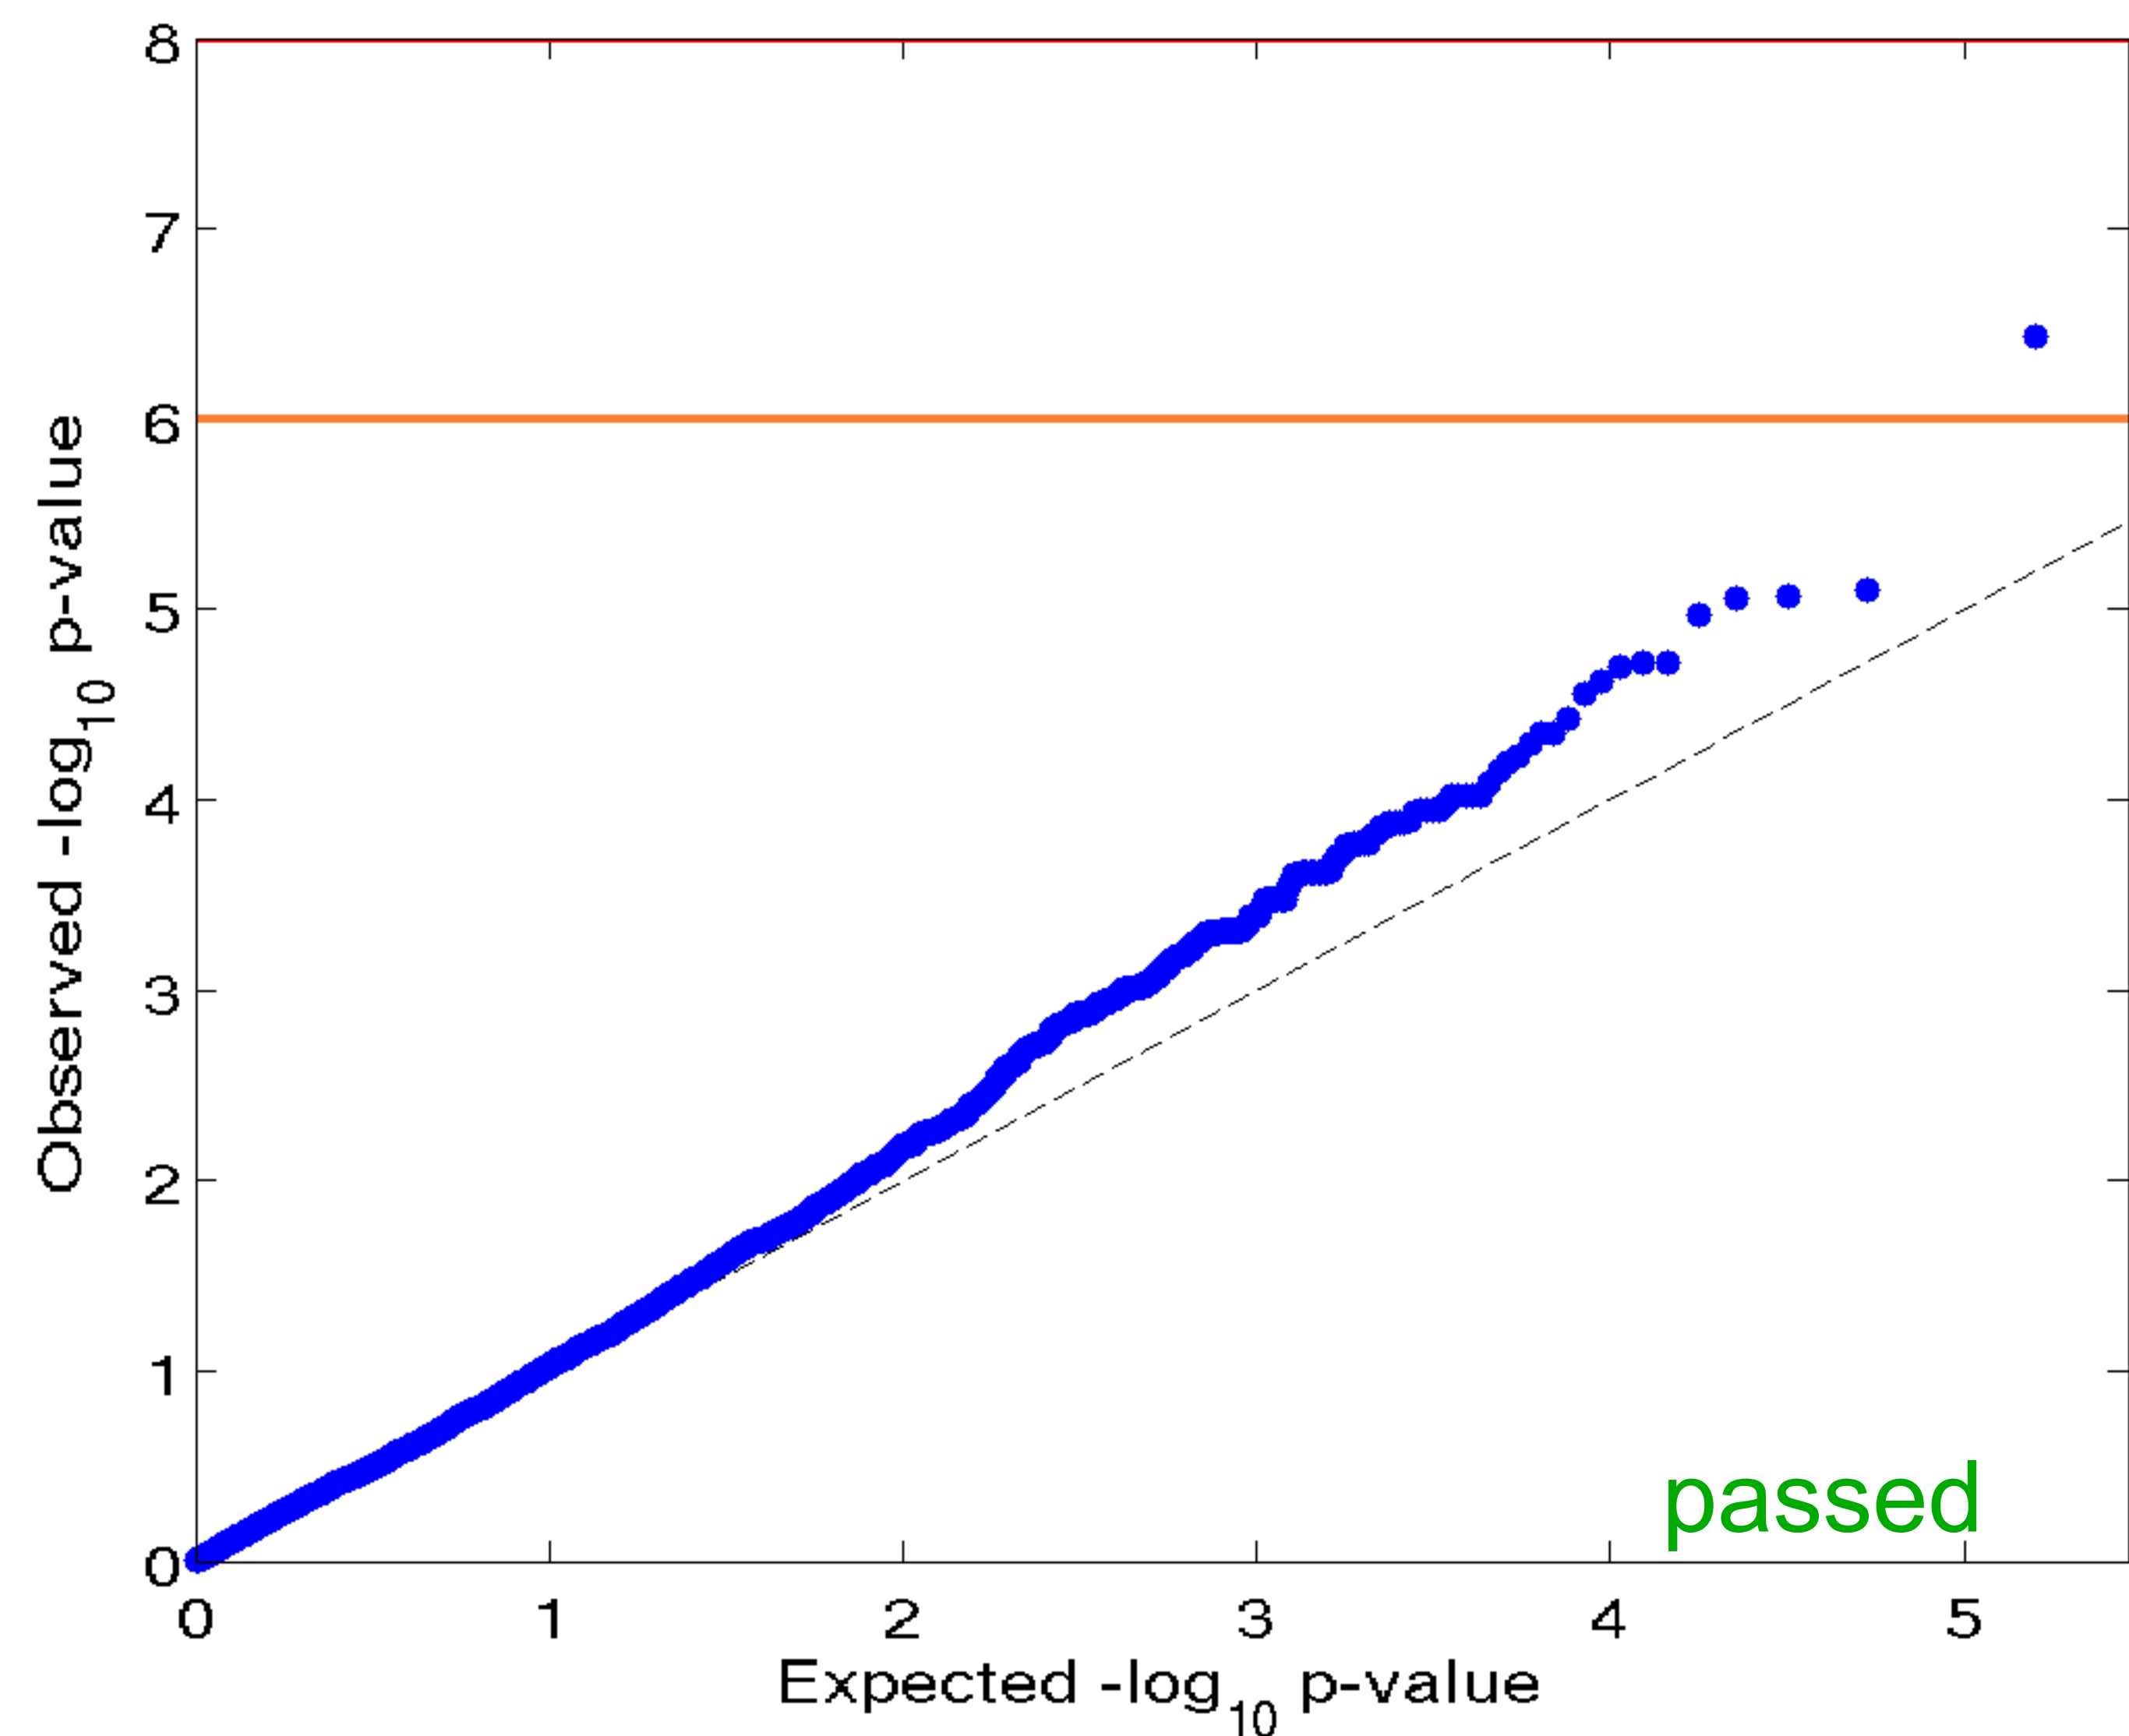

Pamp - iso10 vs ate

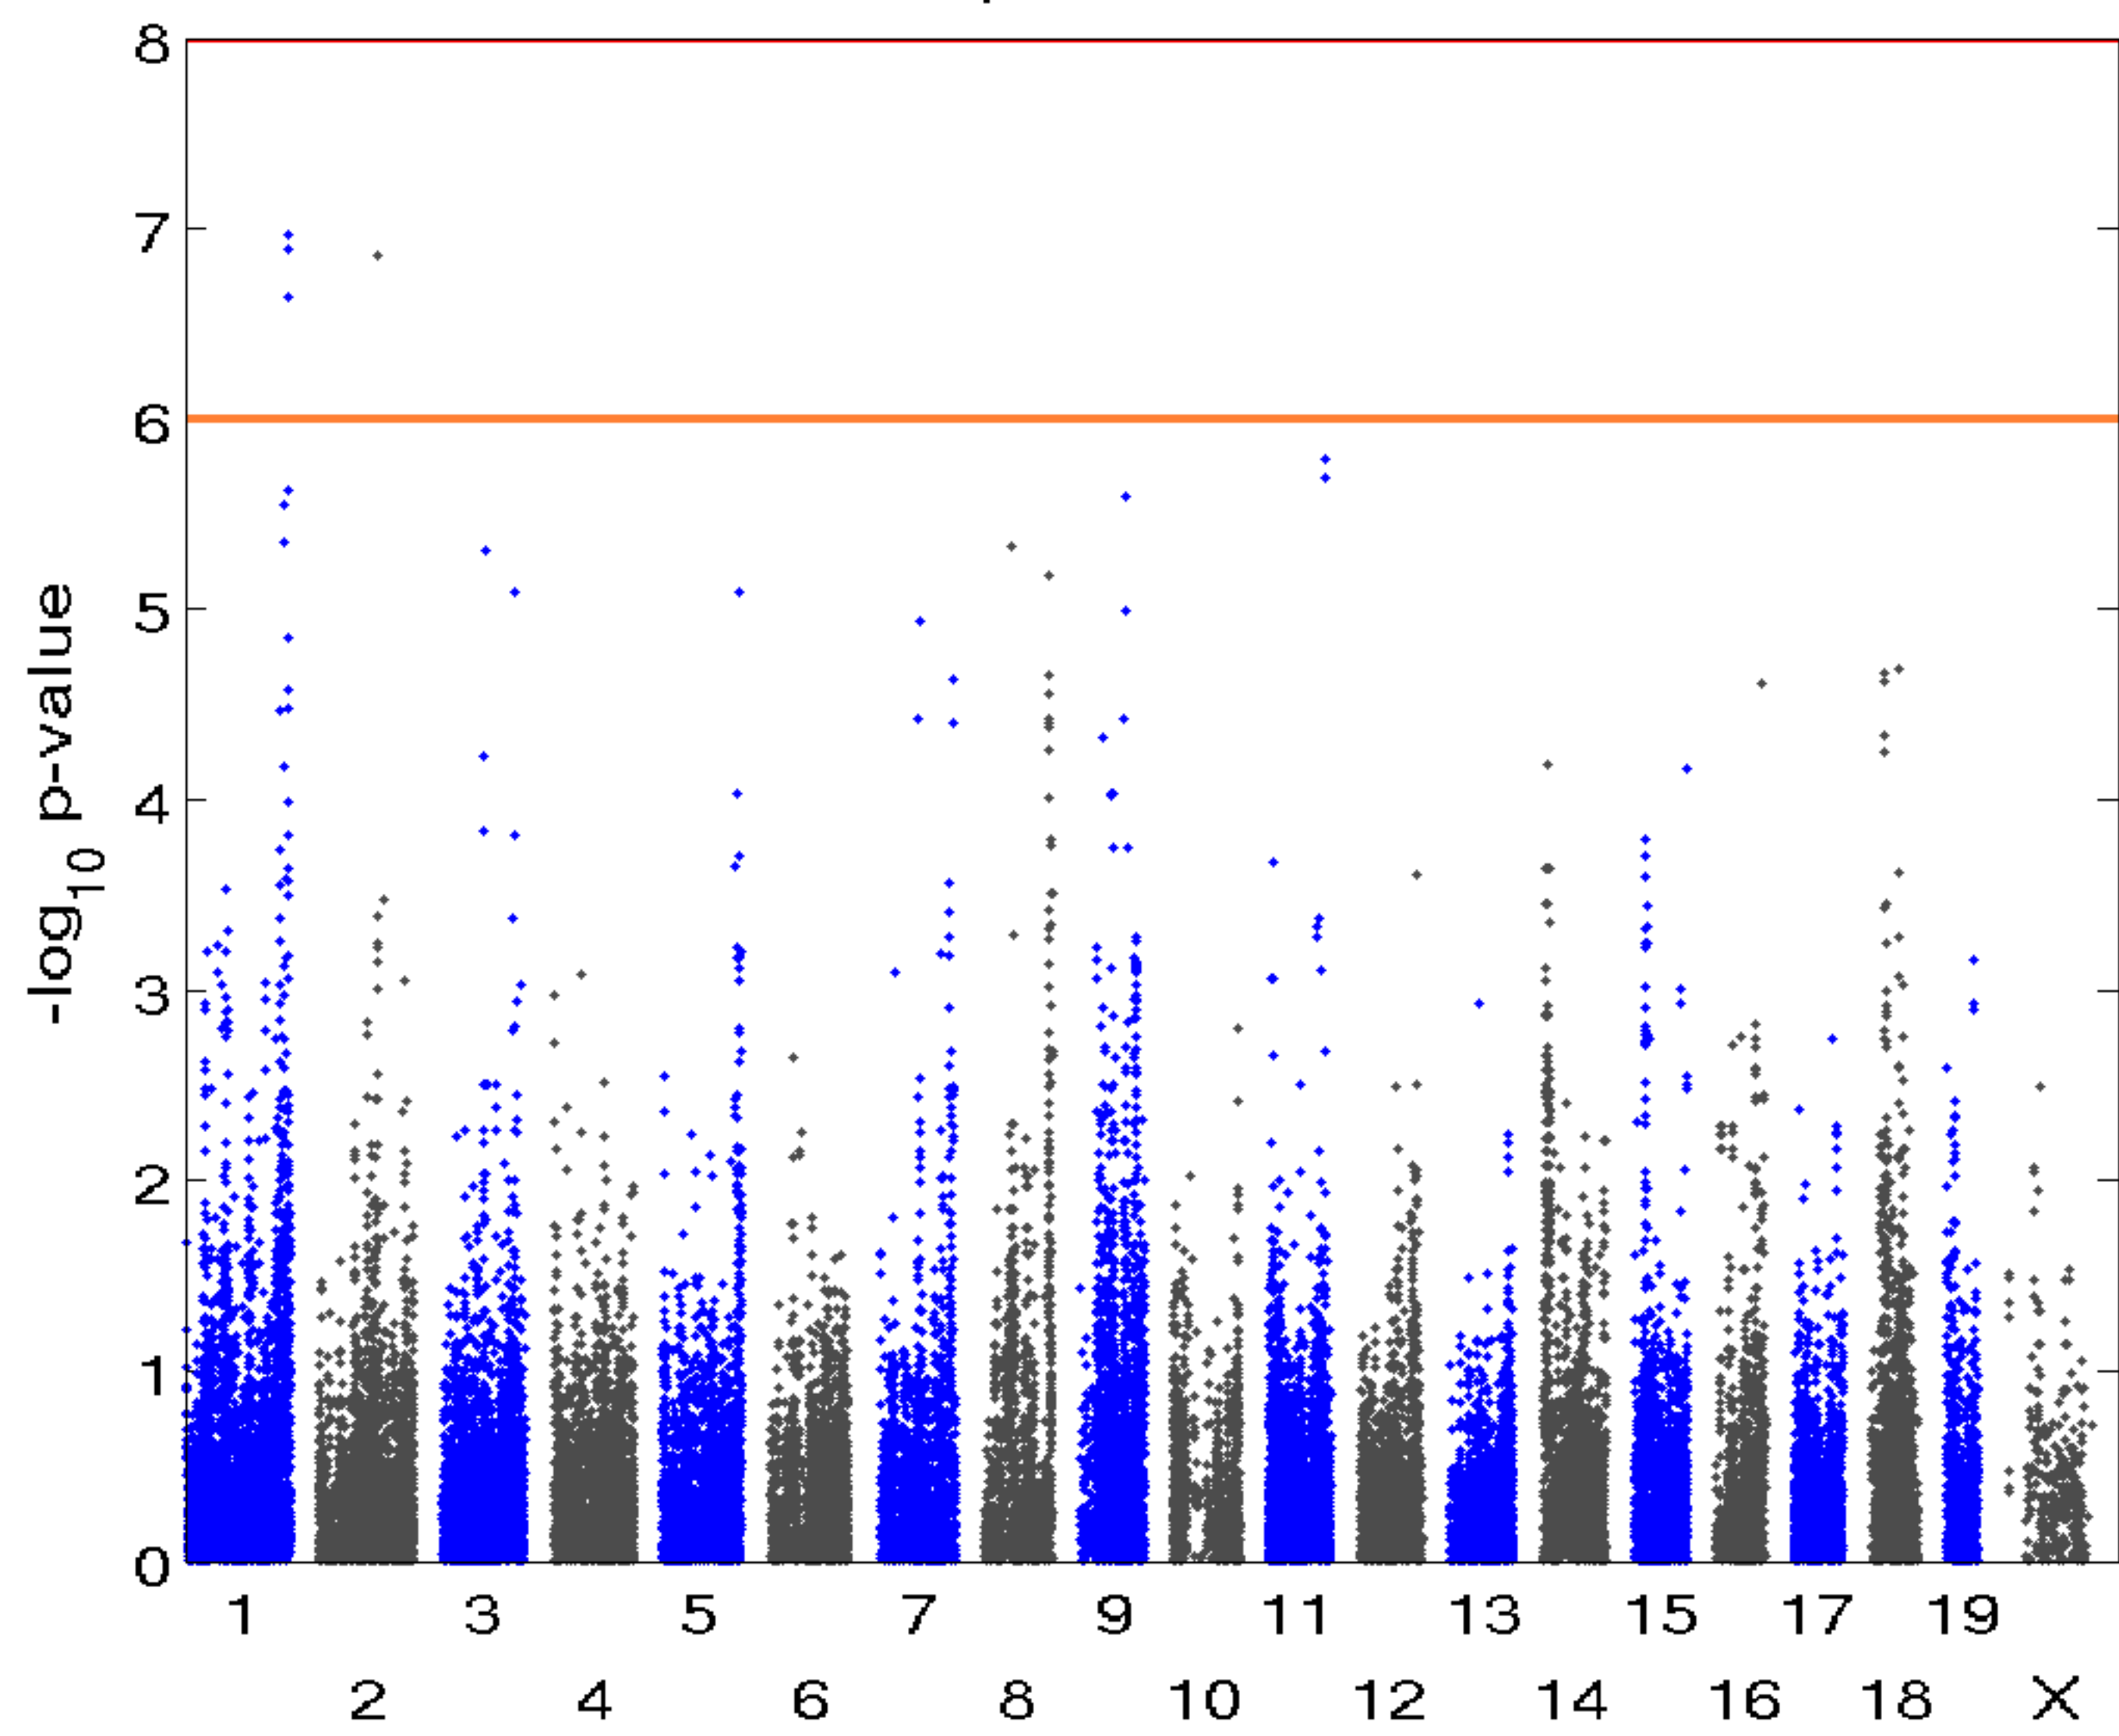

Pamp - iso10 vs ate

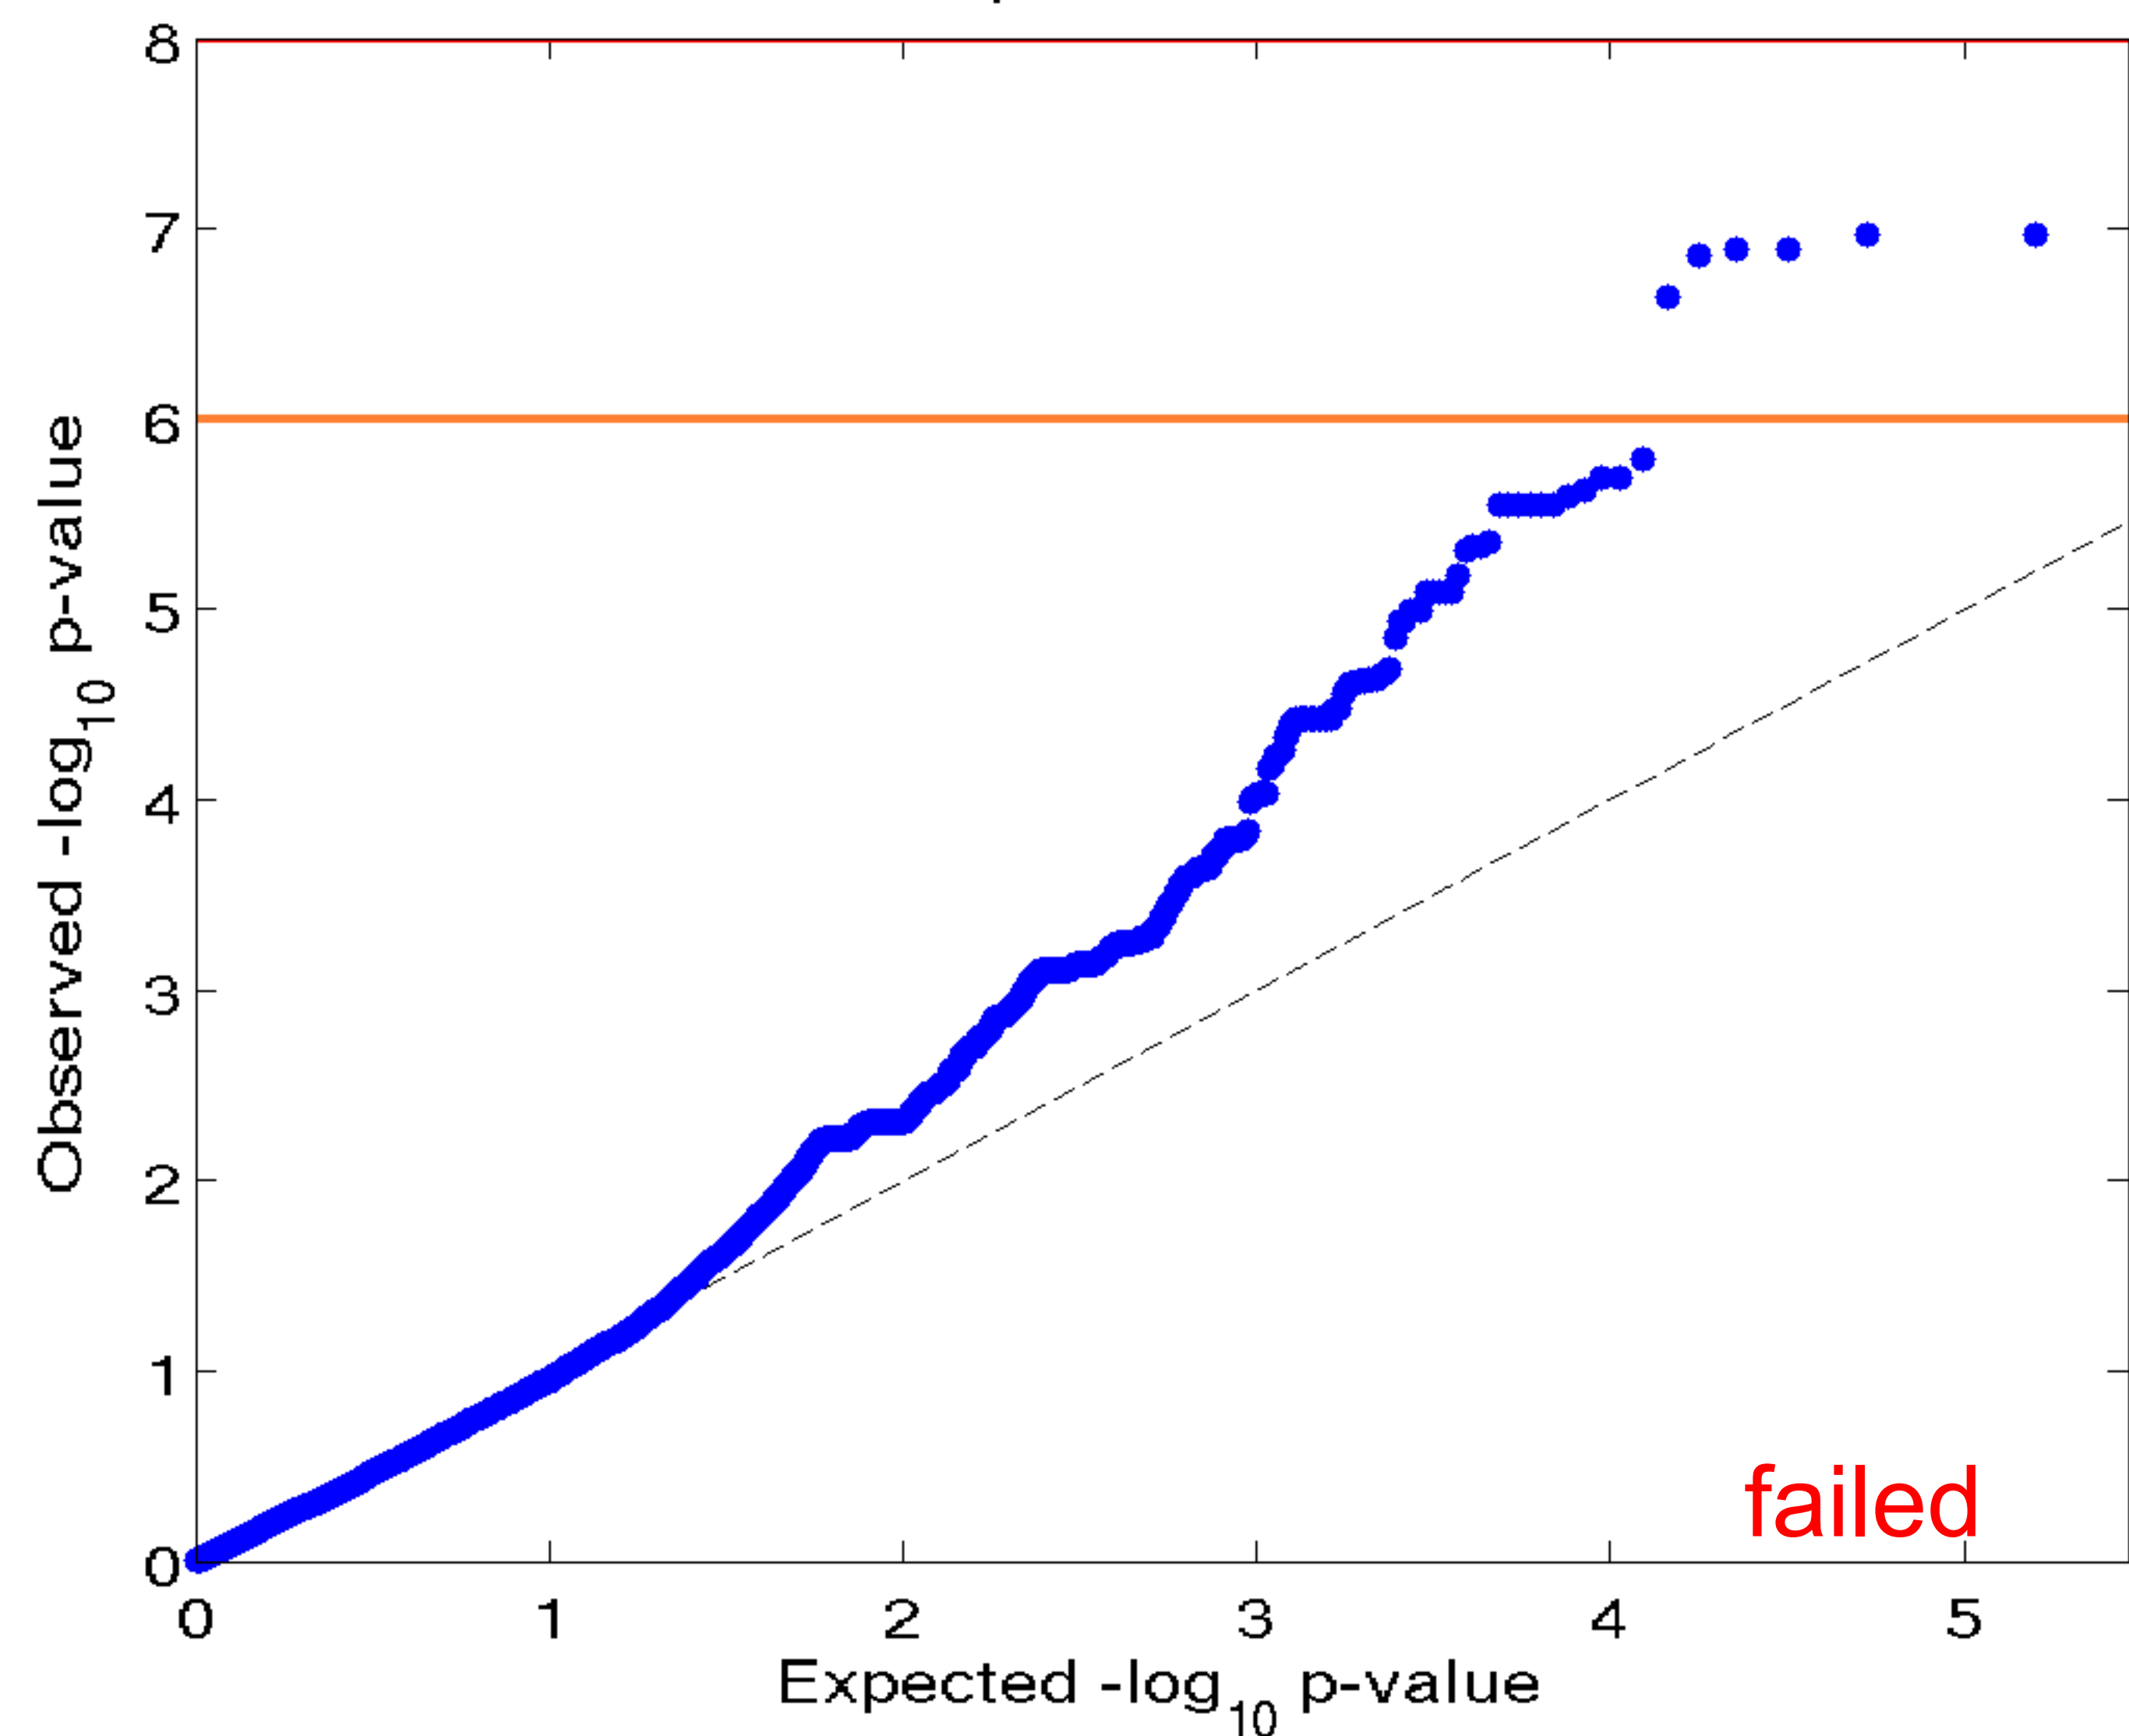



Parea - iso10 vs ate

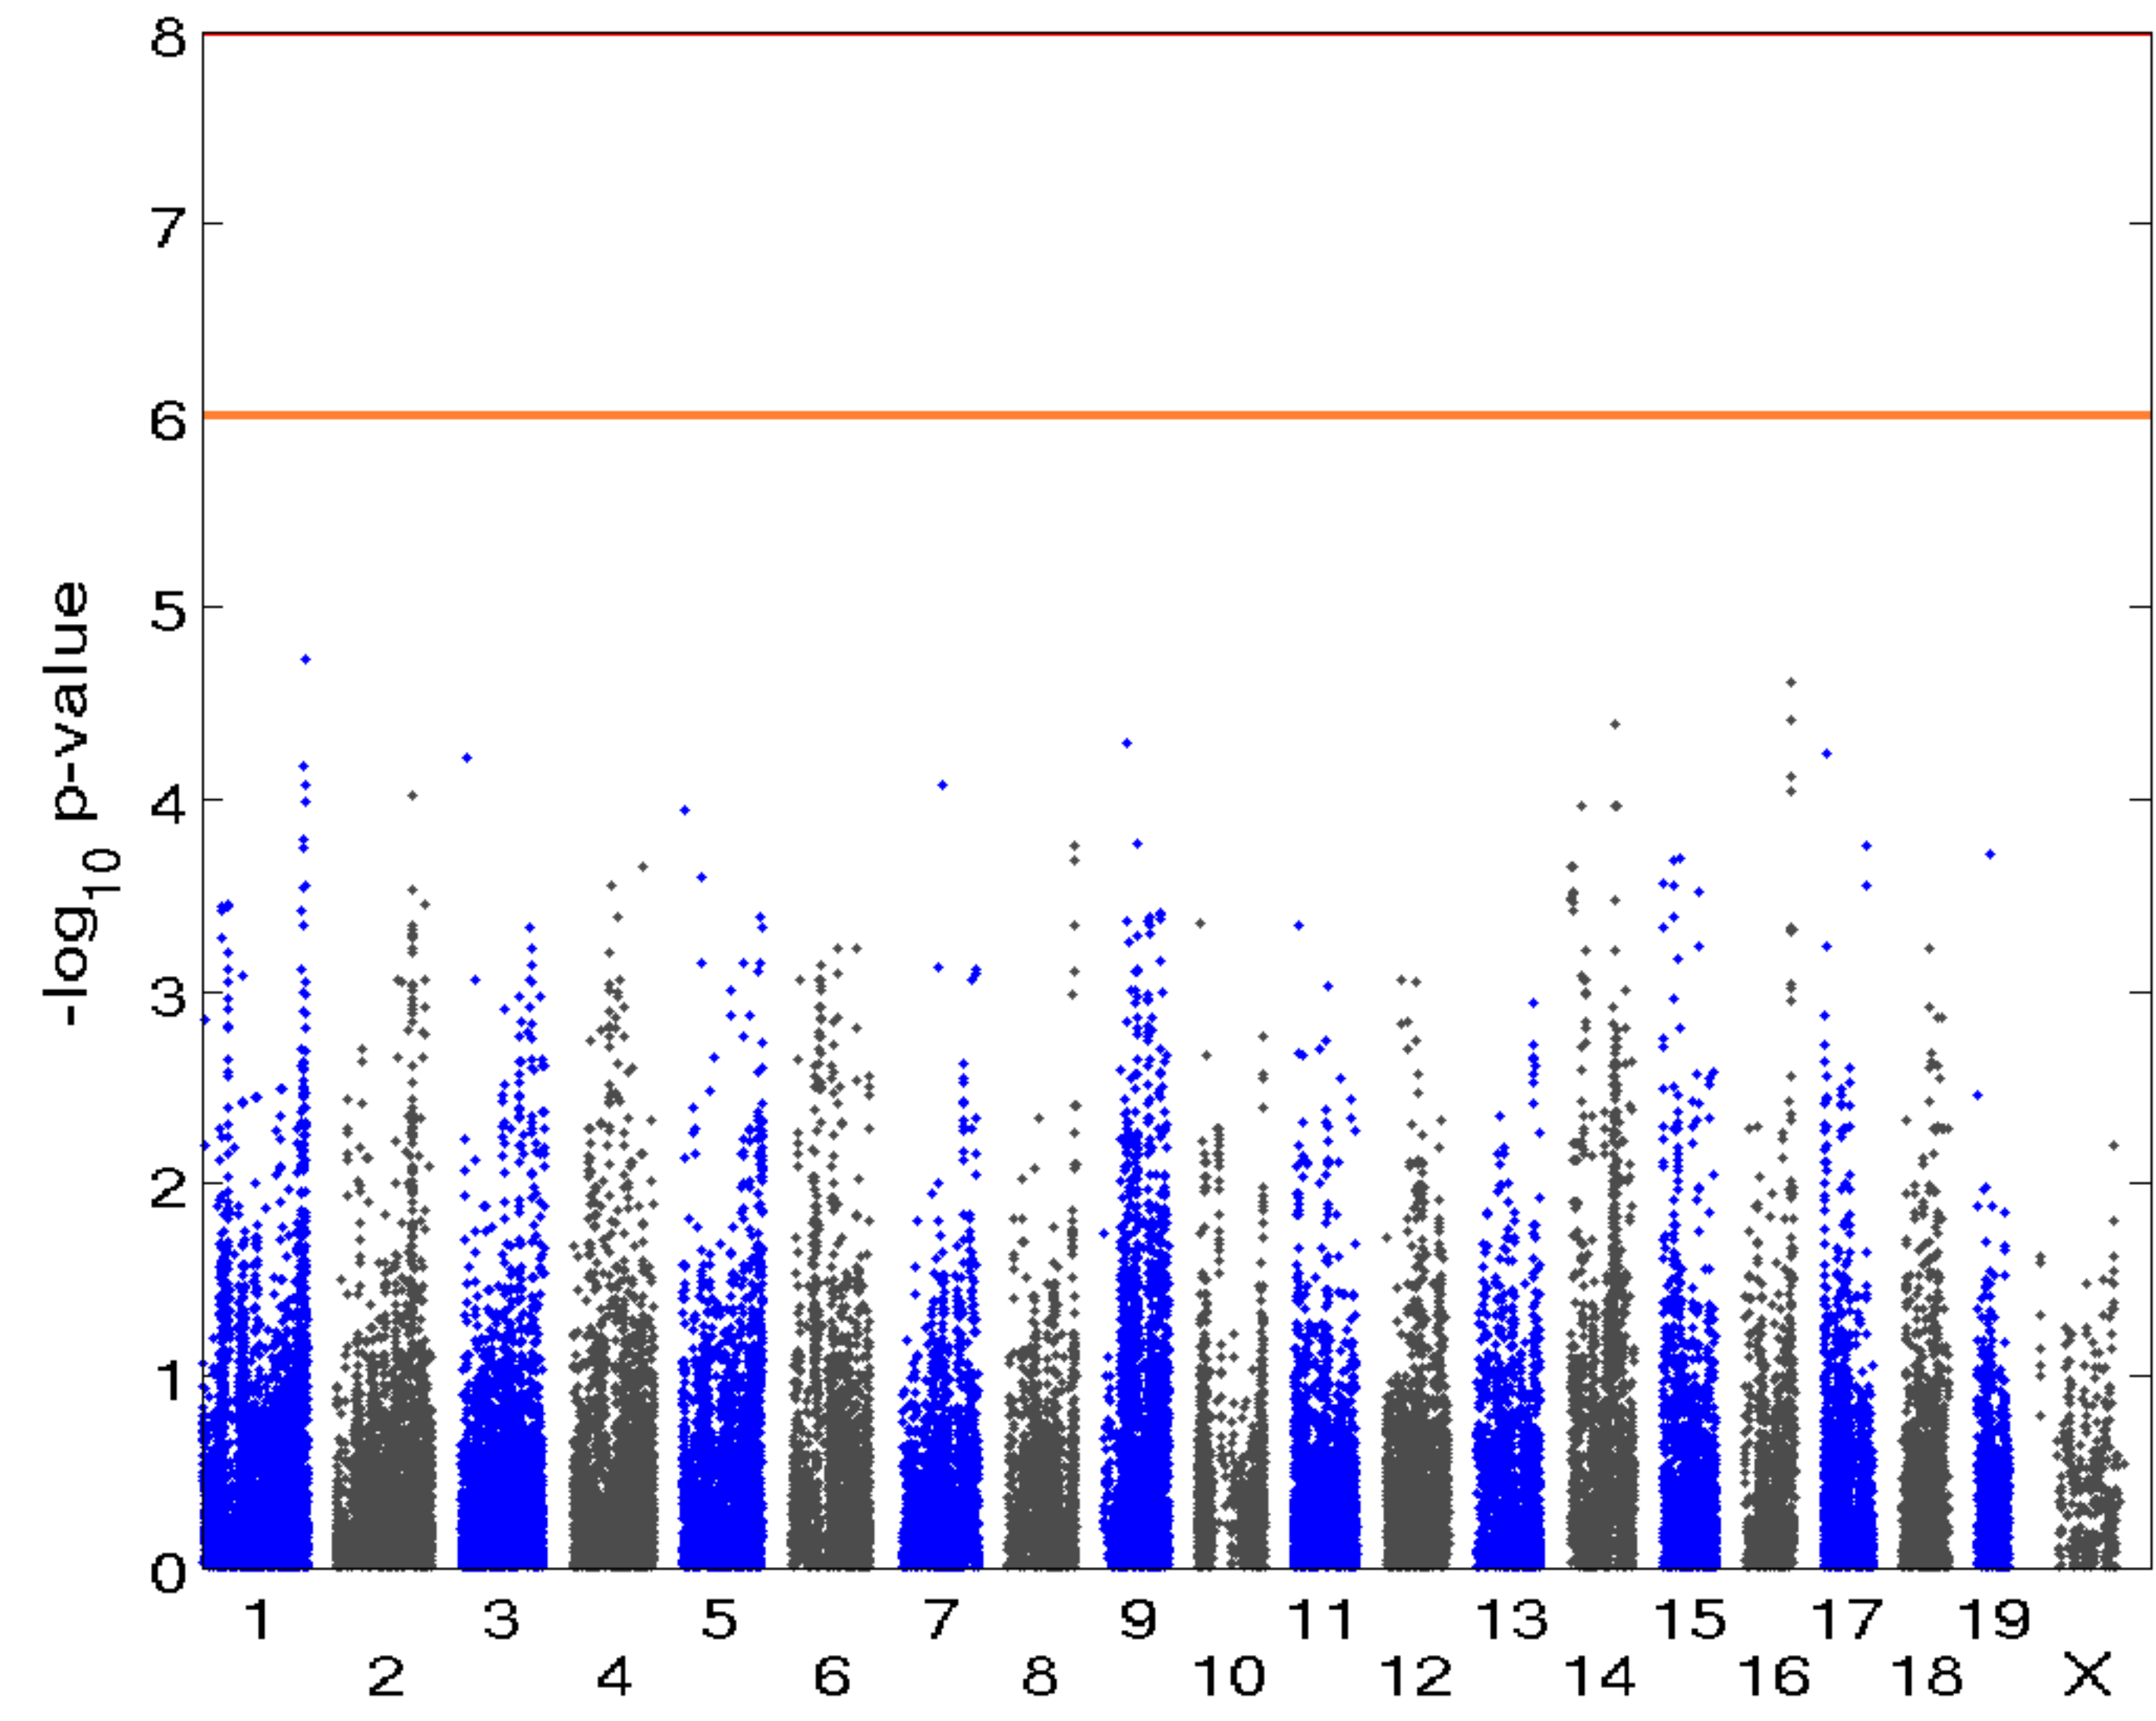

Parea - iso10 vs ate

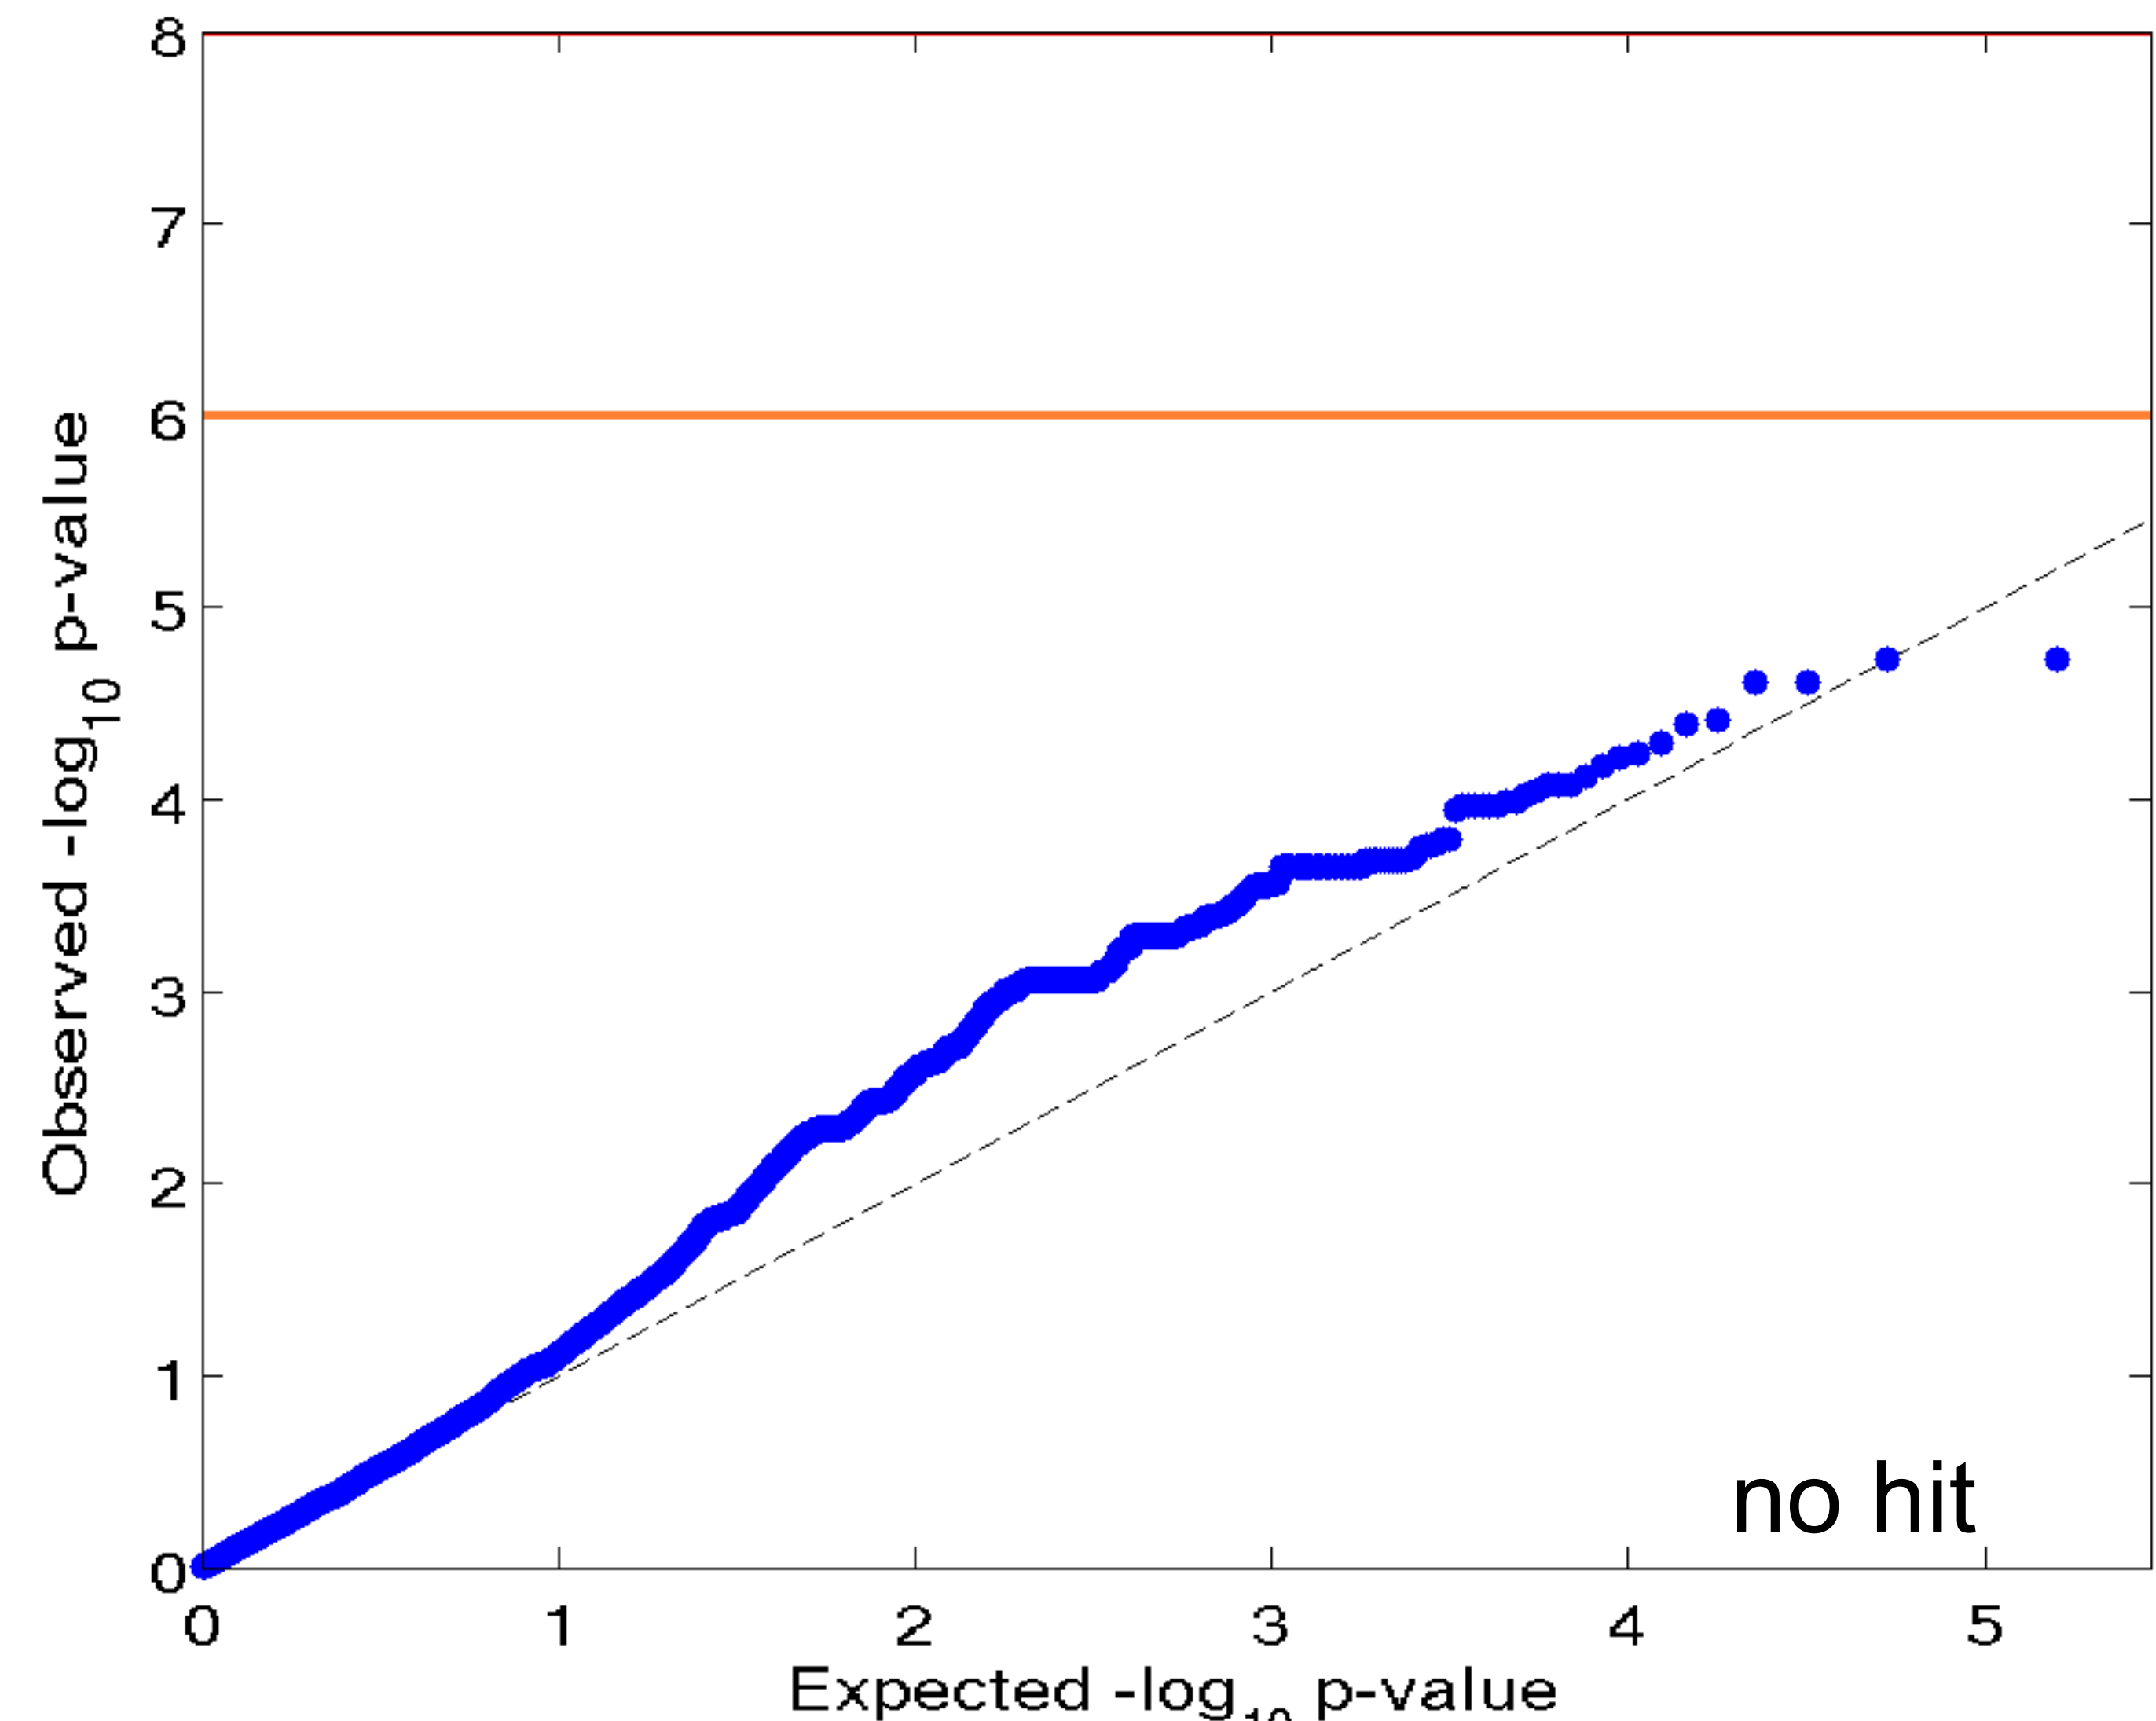

Pdur - iso10 vs ate

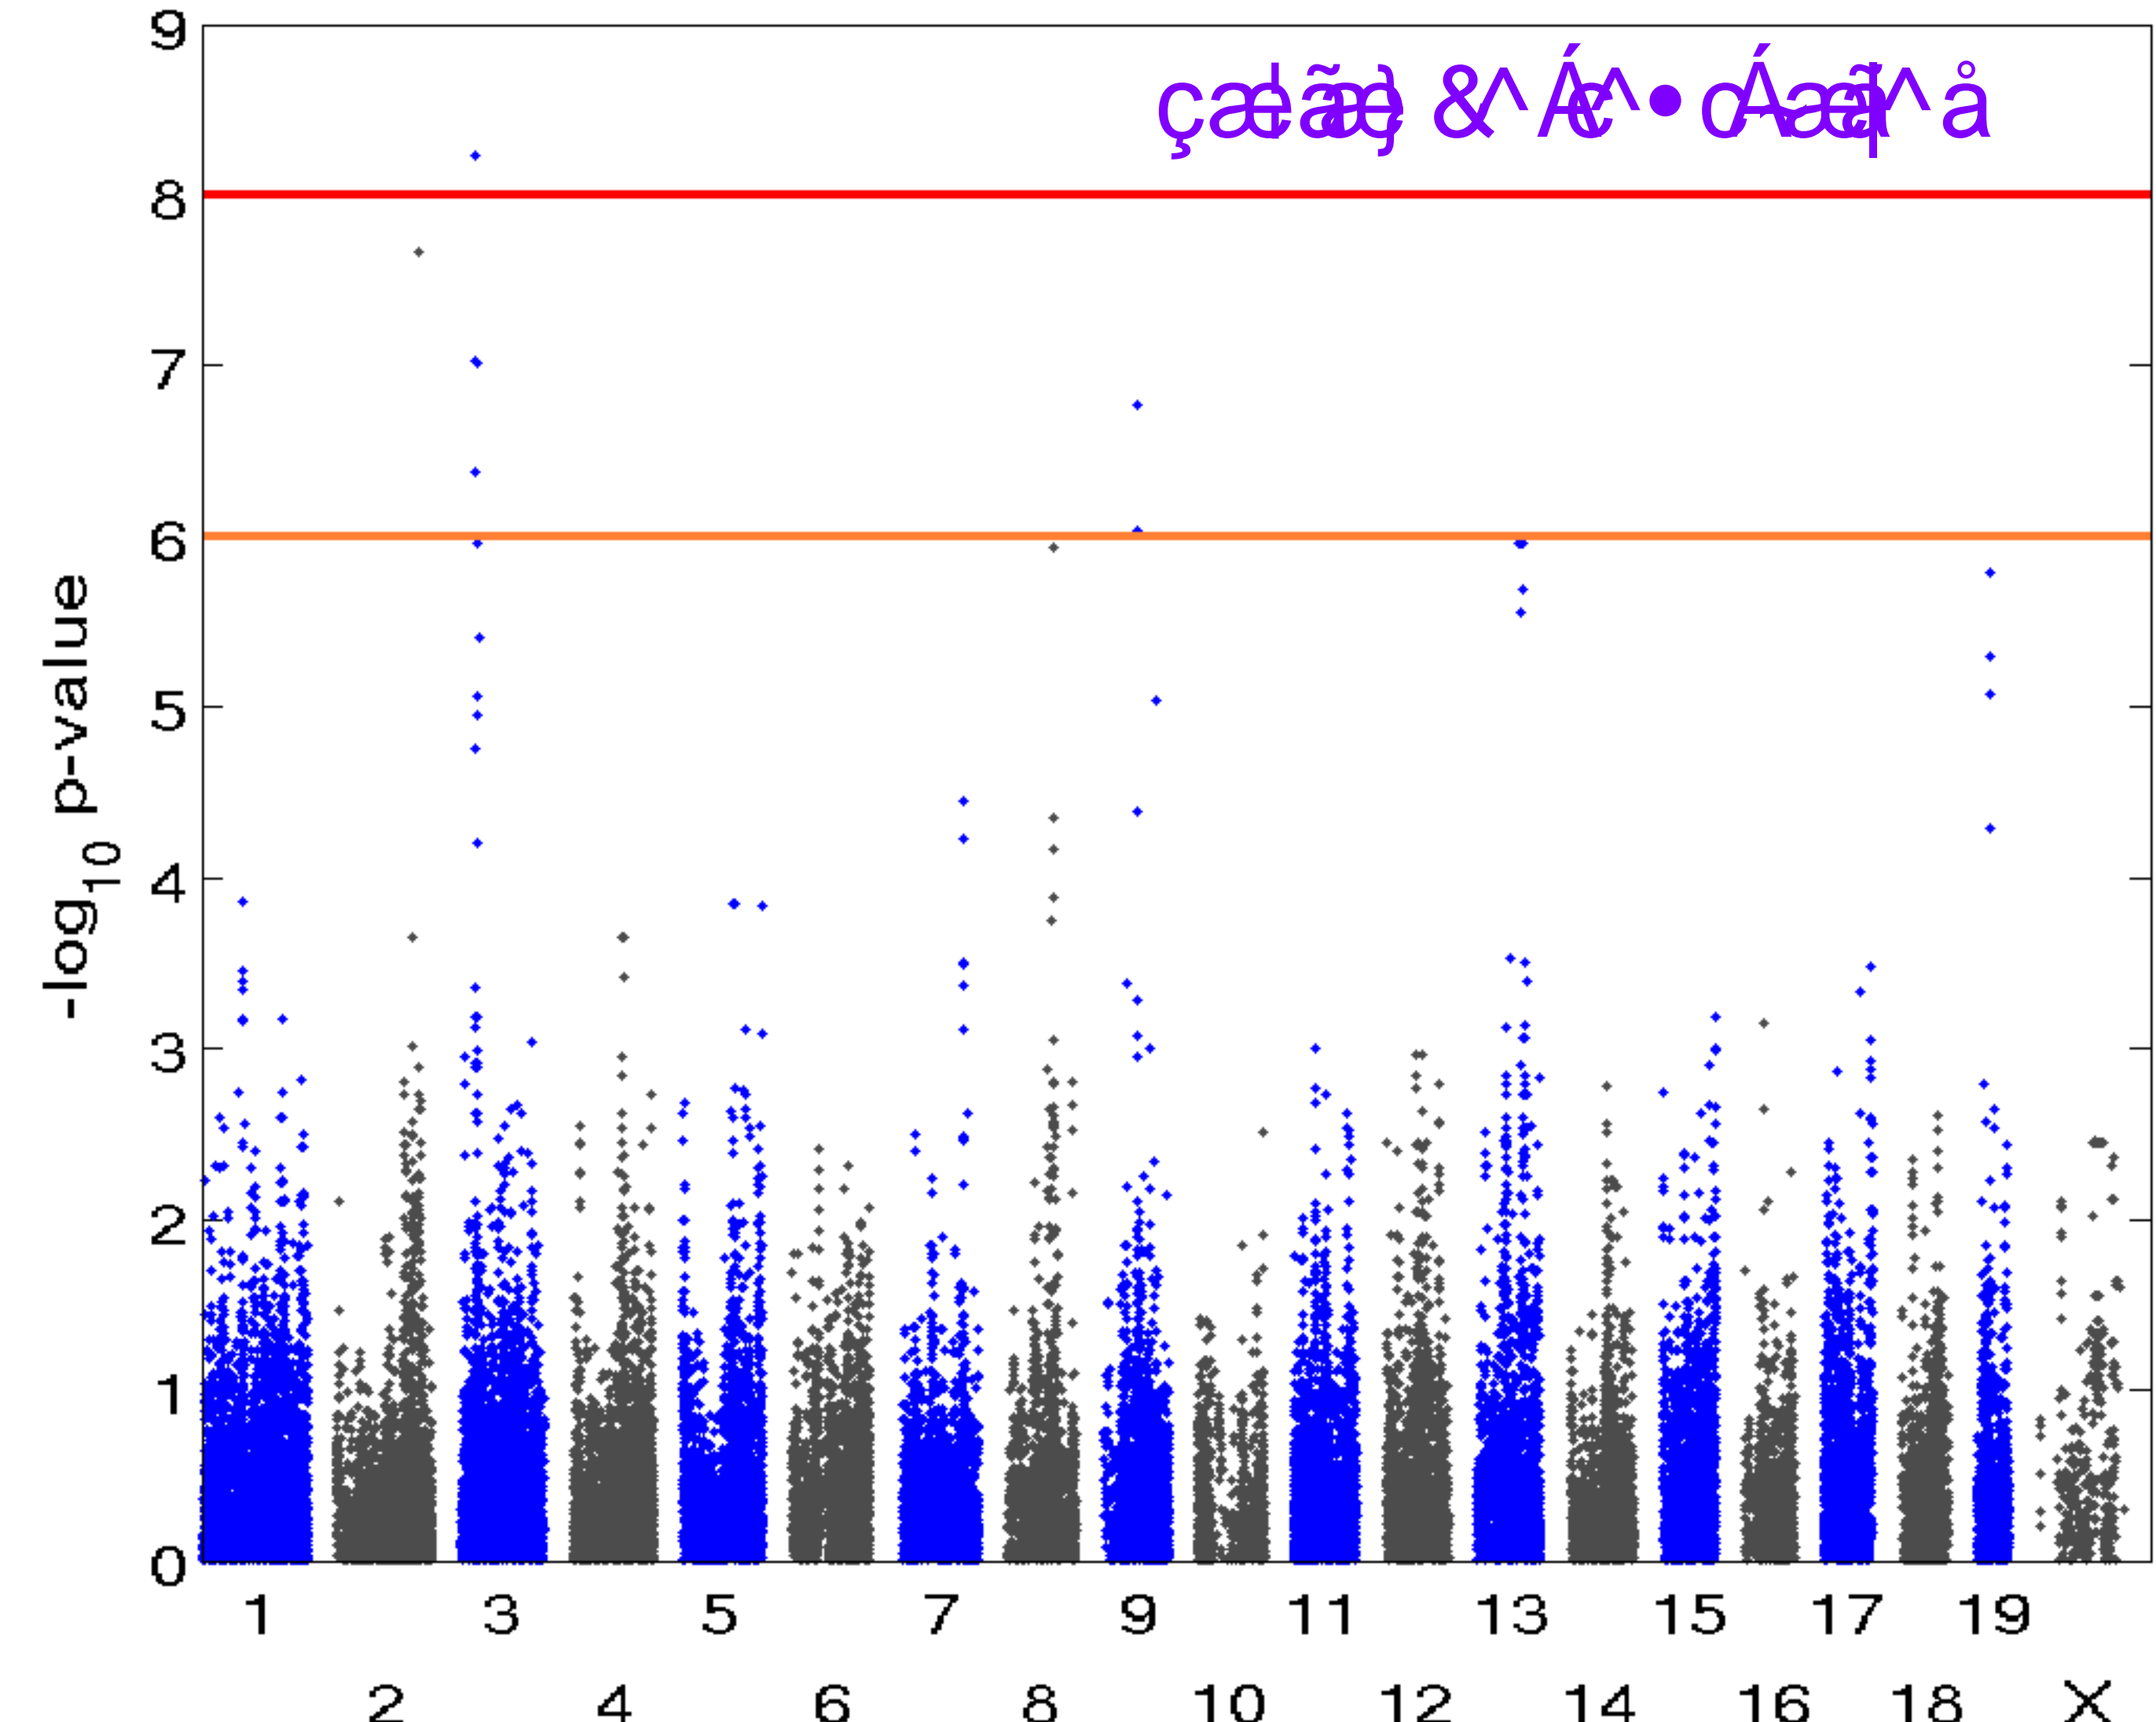

Pdur - iso10 vs ate

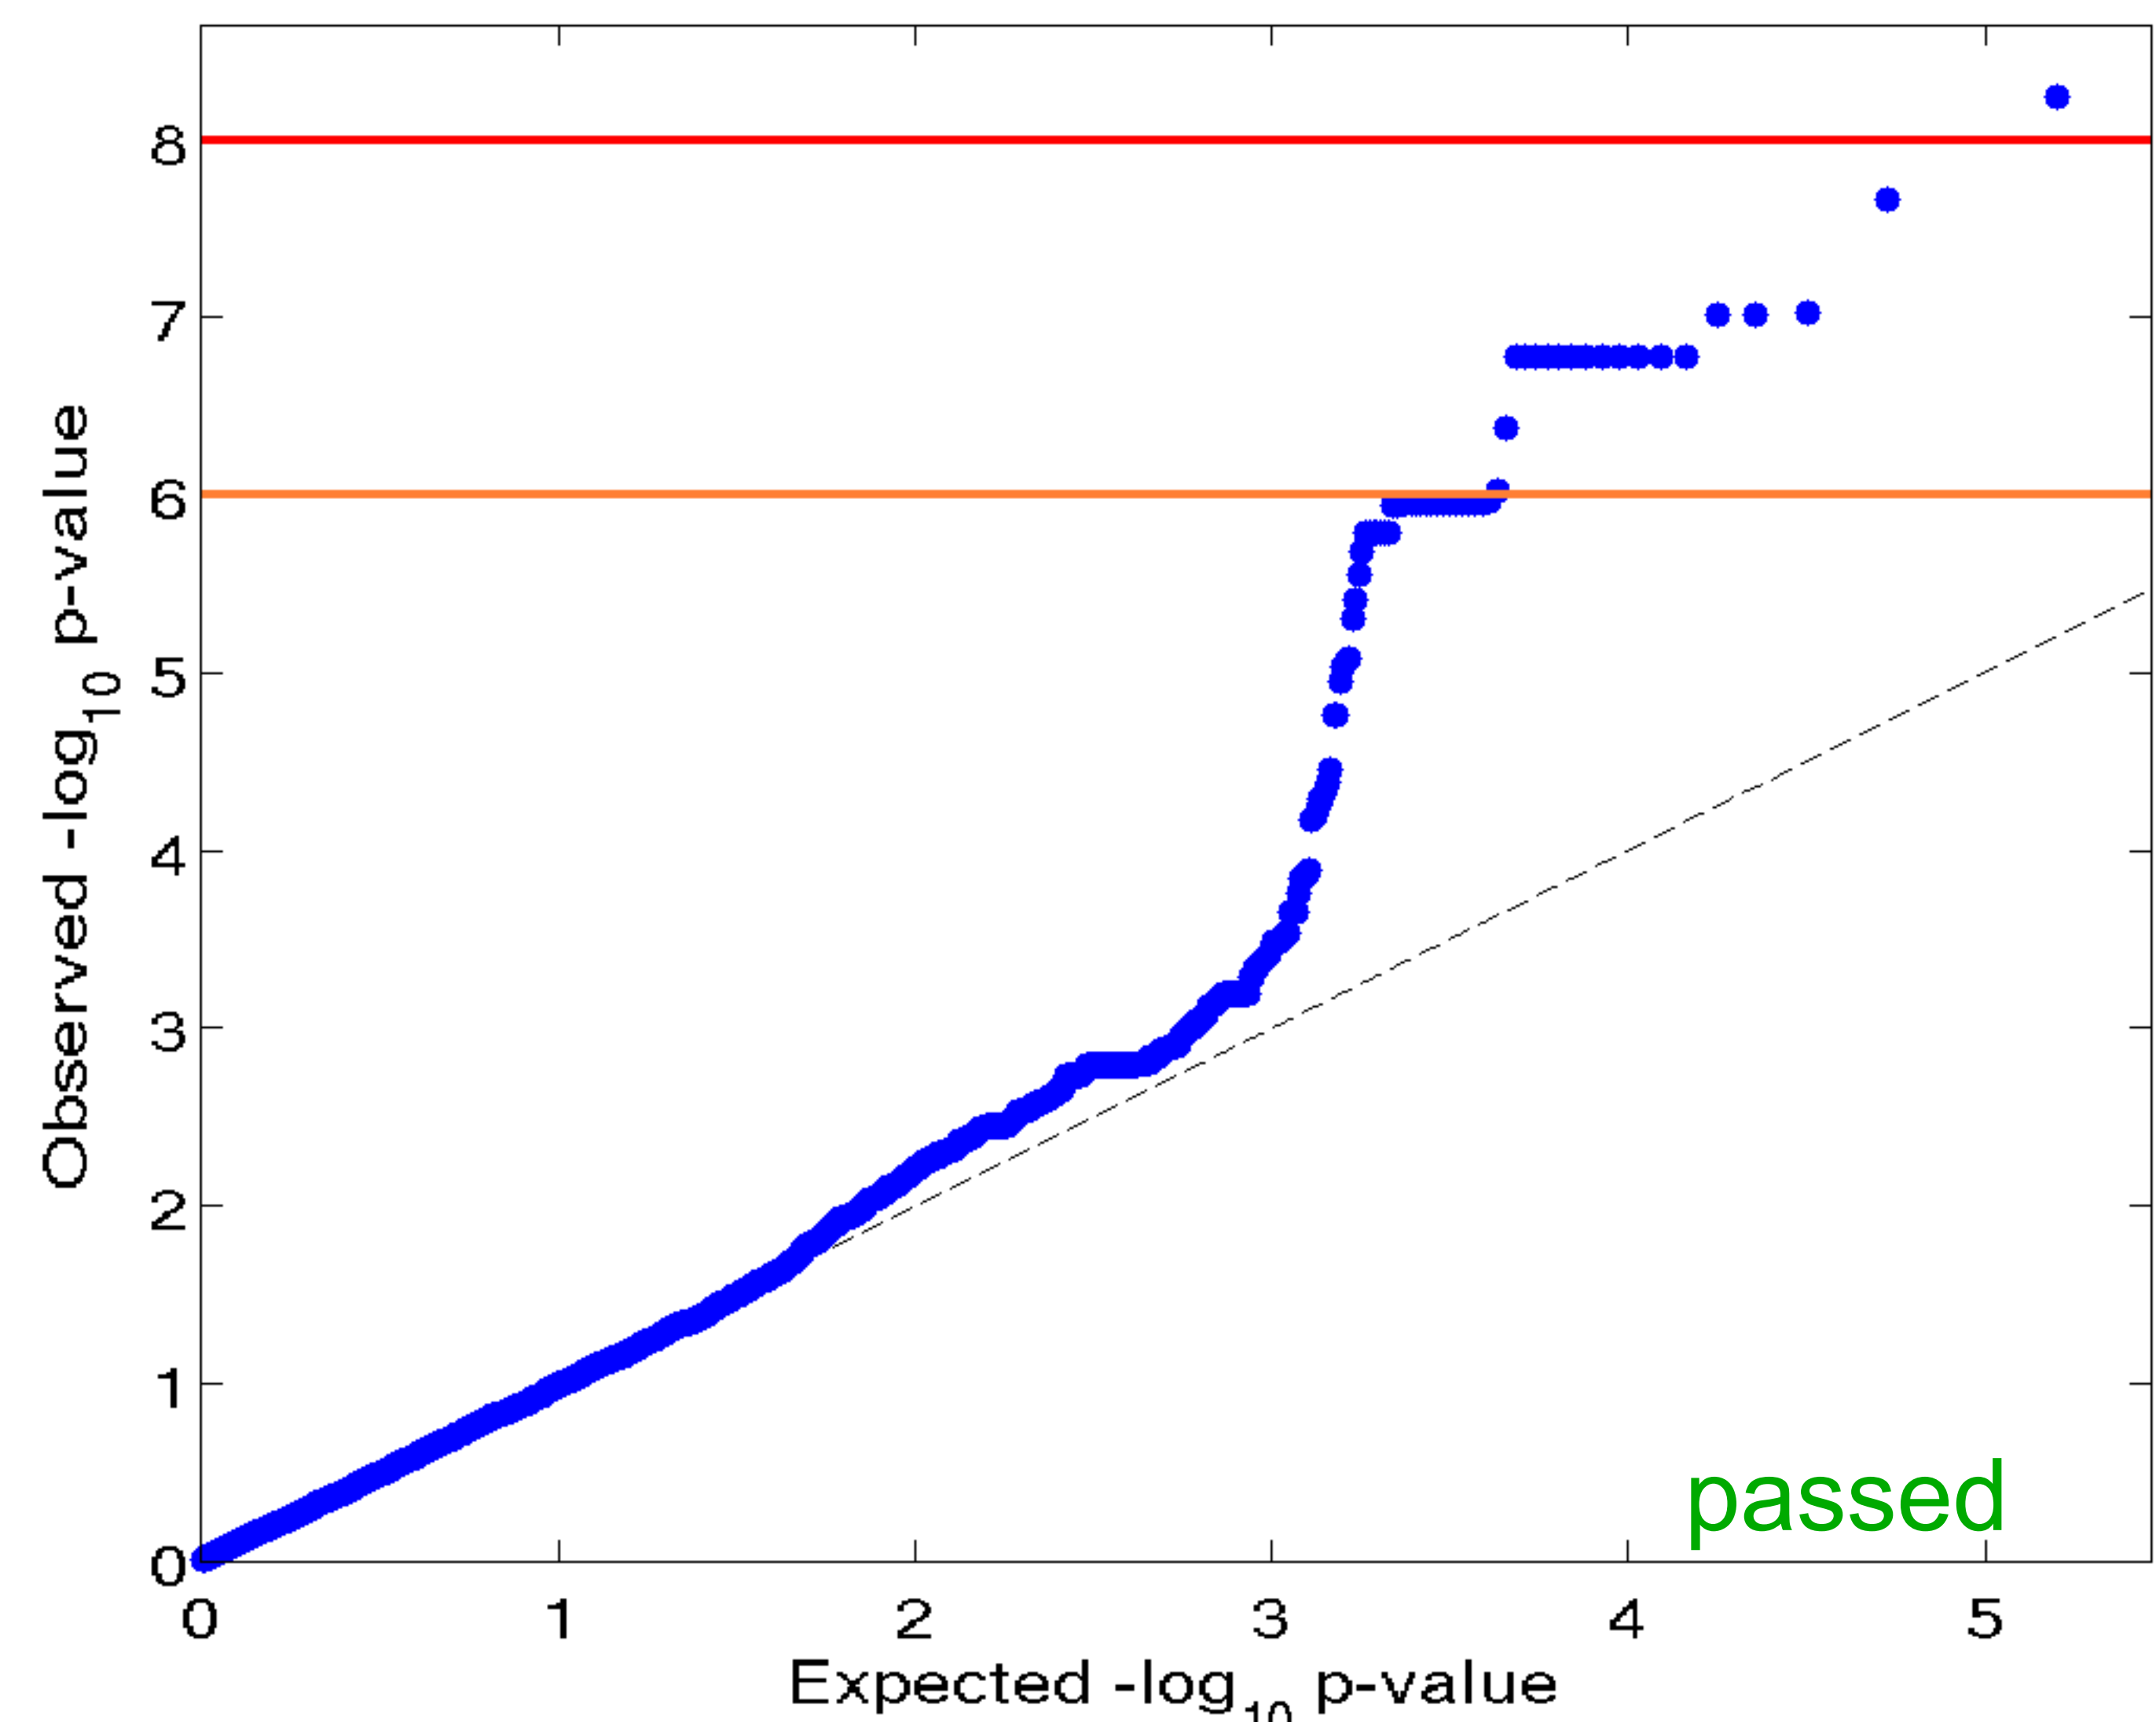

PR - iso10 vs ate

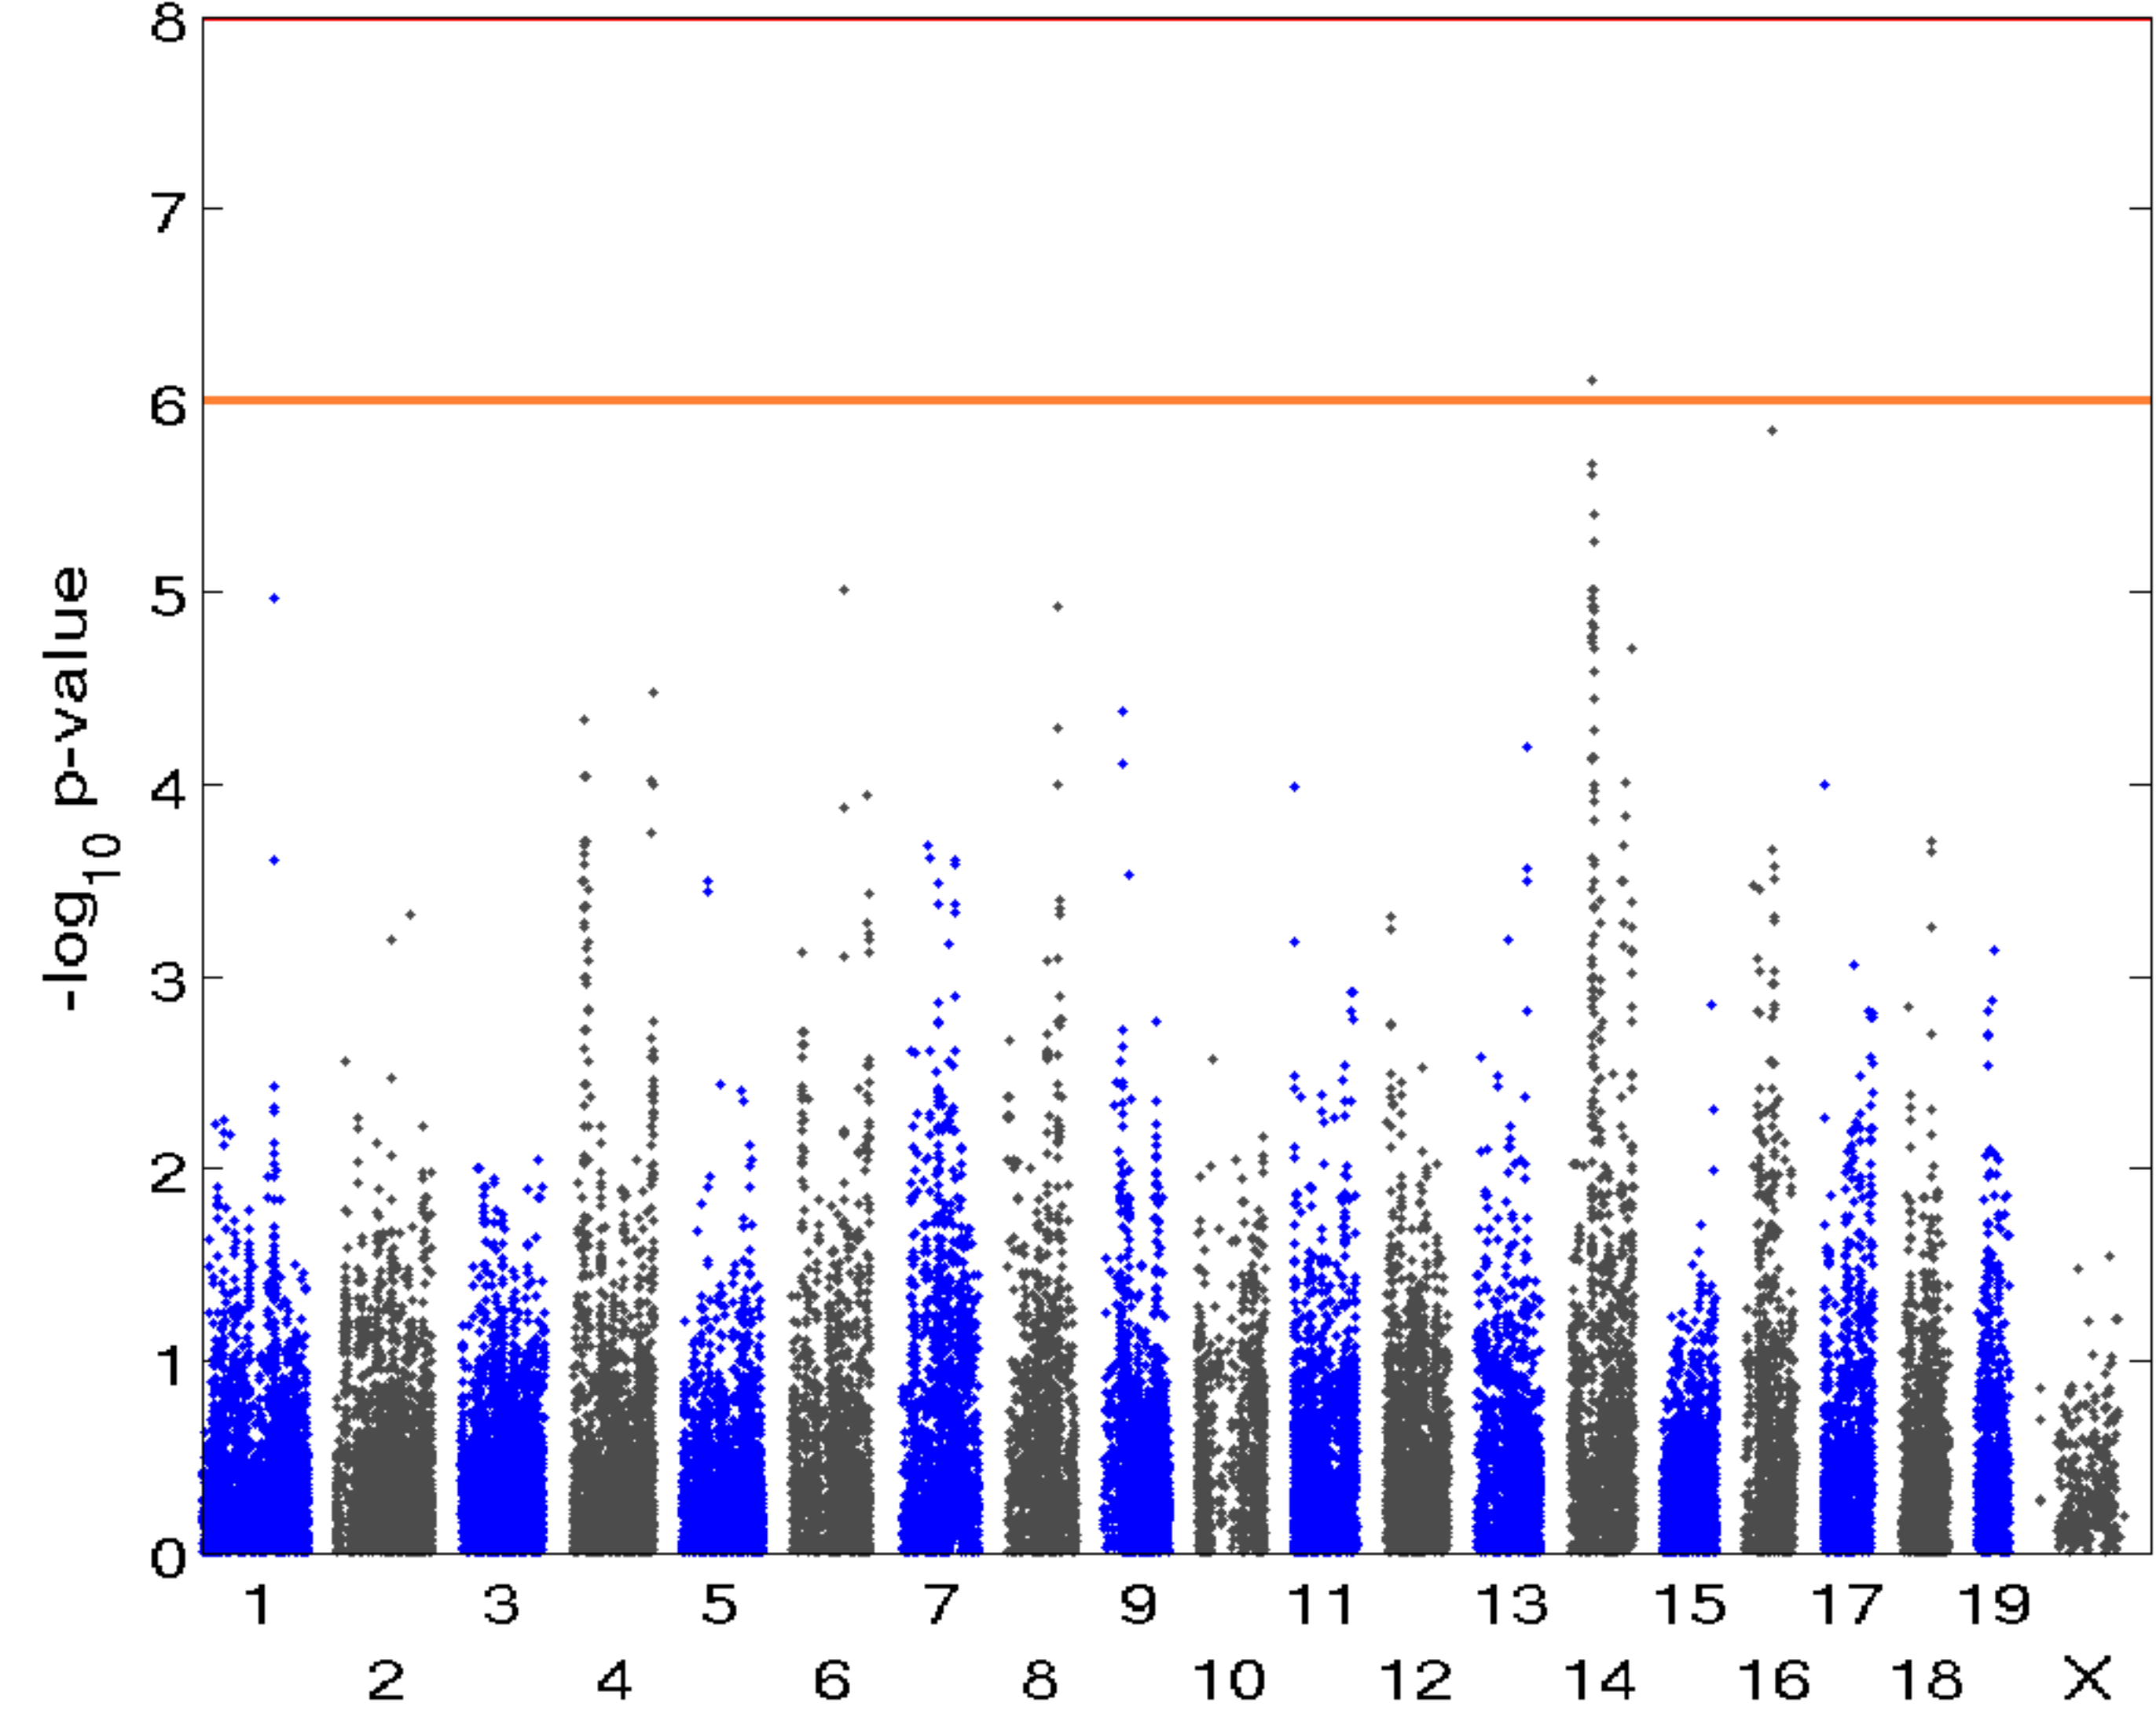

PR - iso10 vs ate

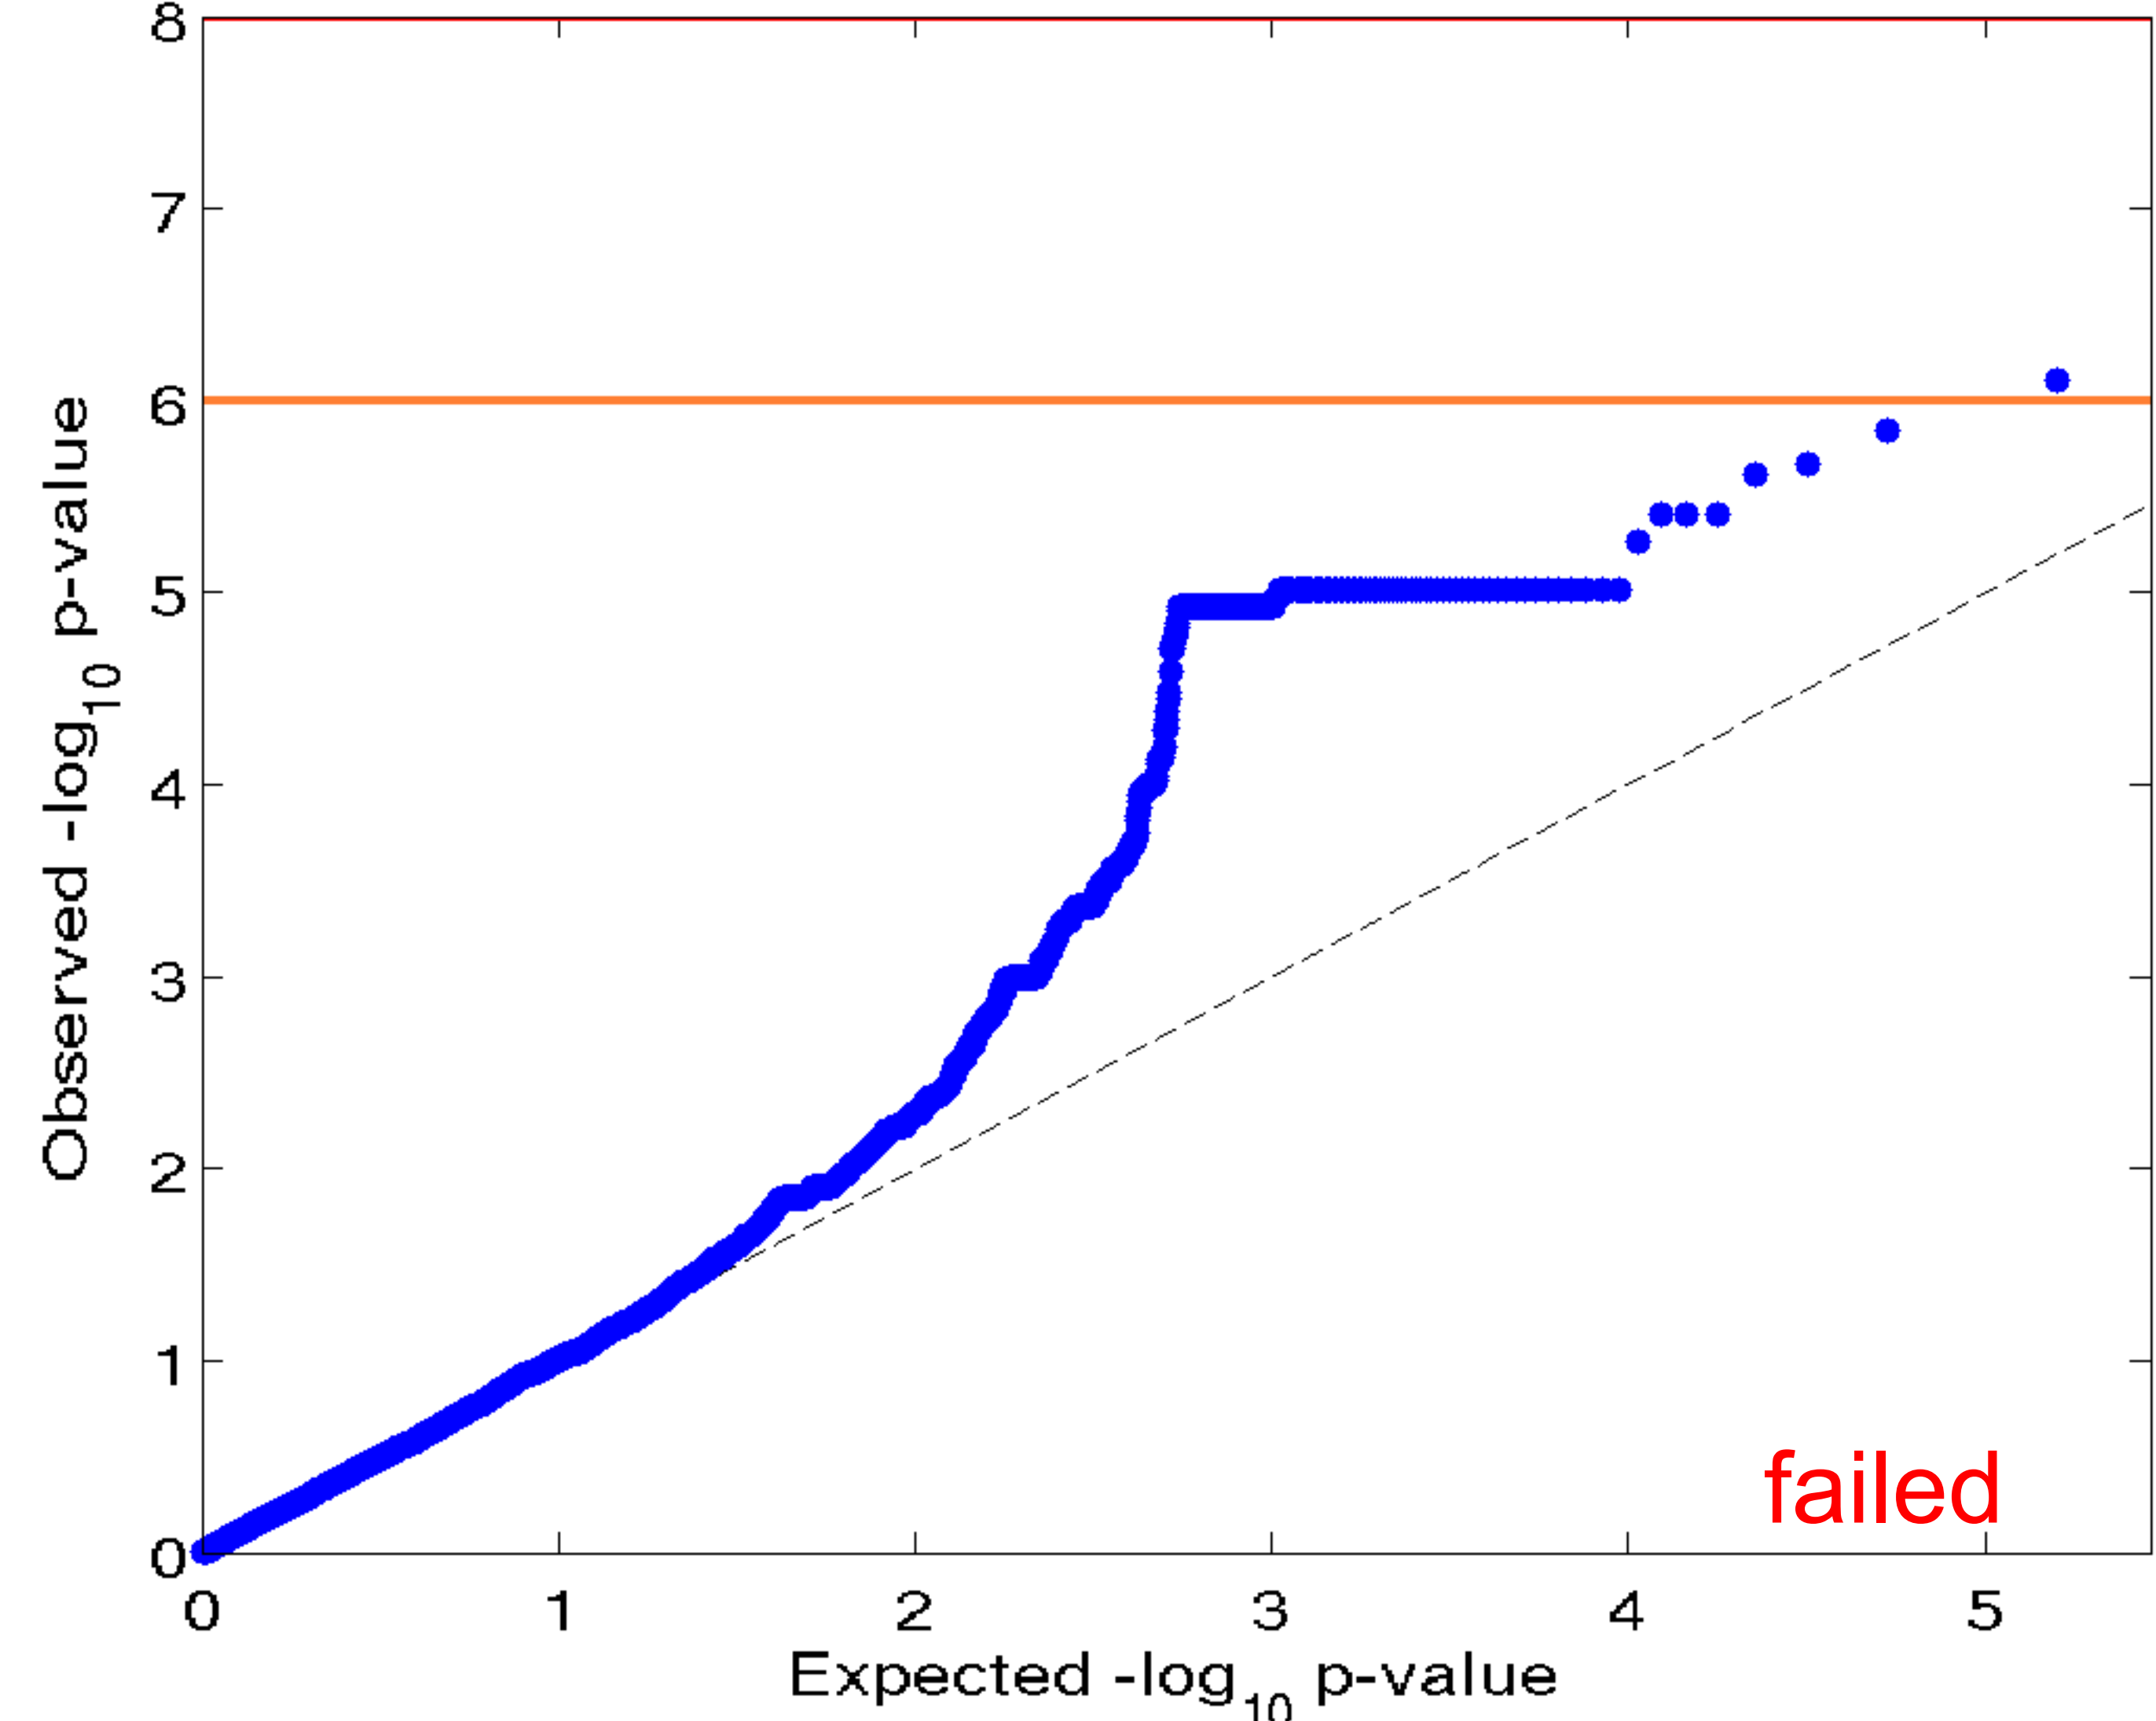

Qamp - iso10 vs ate

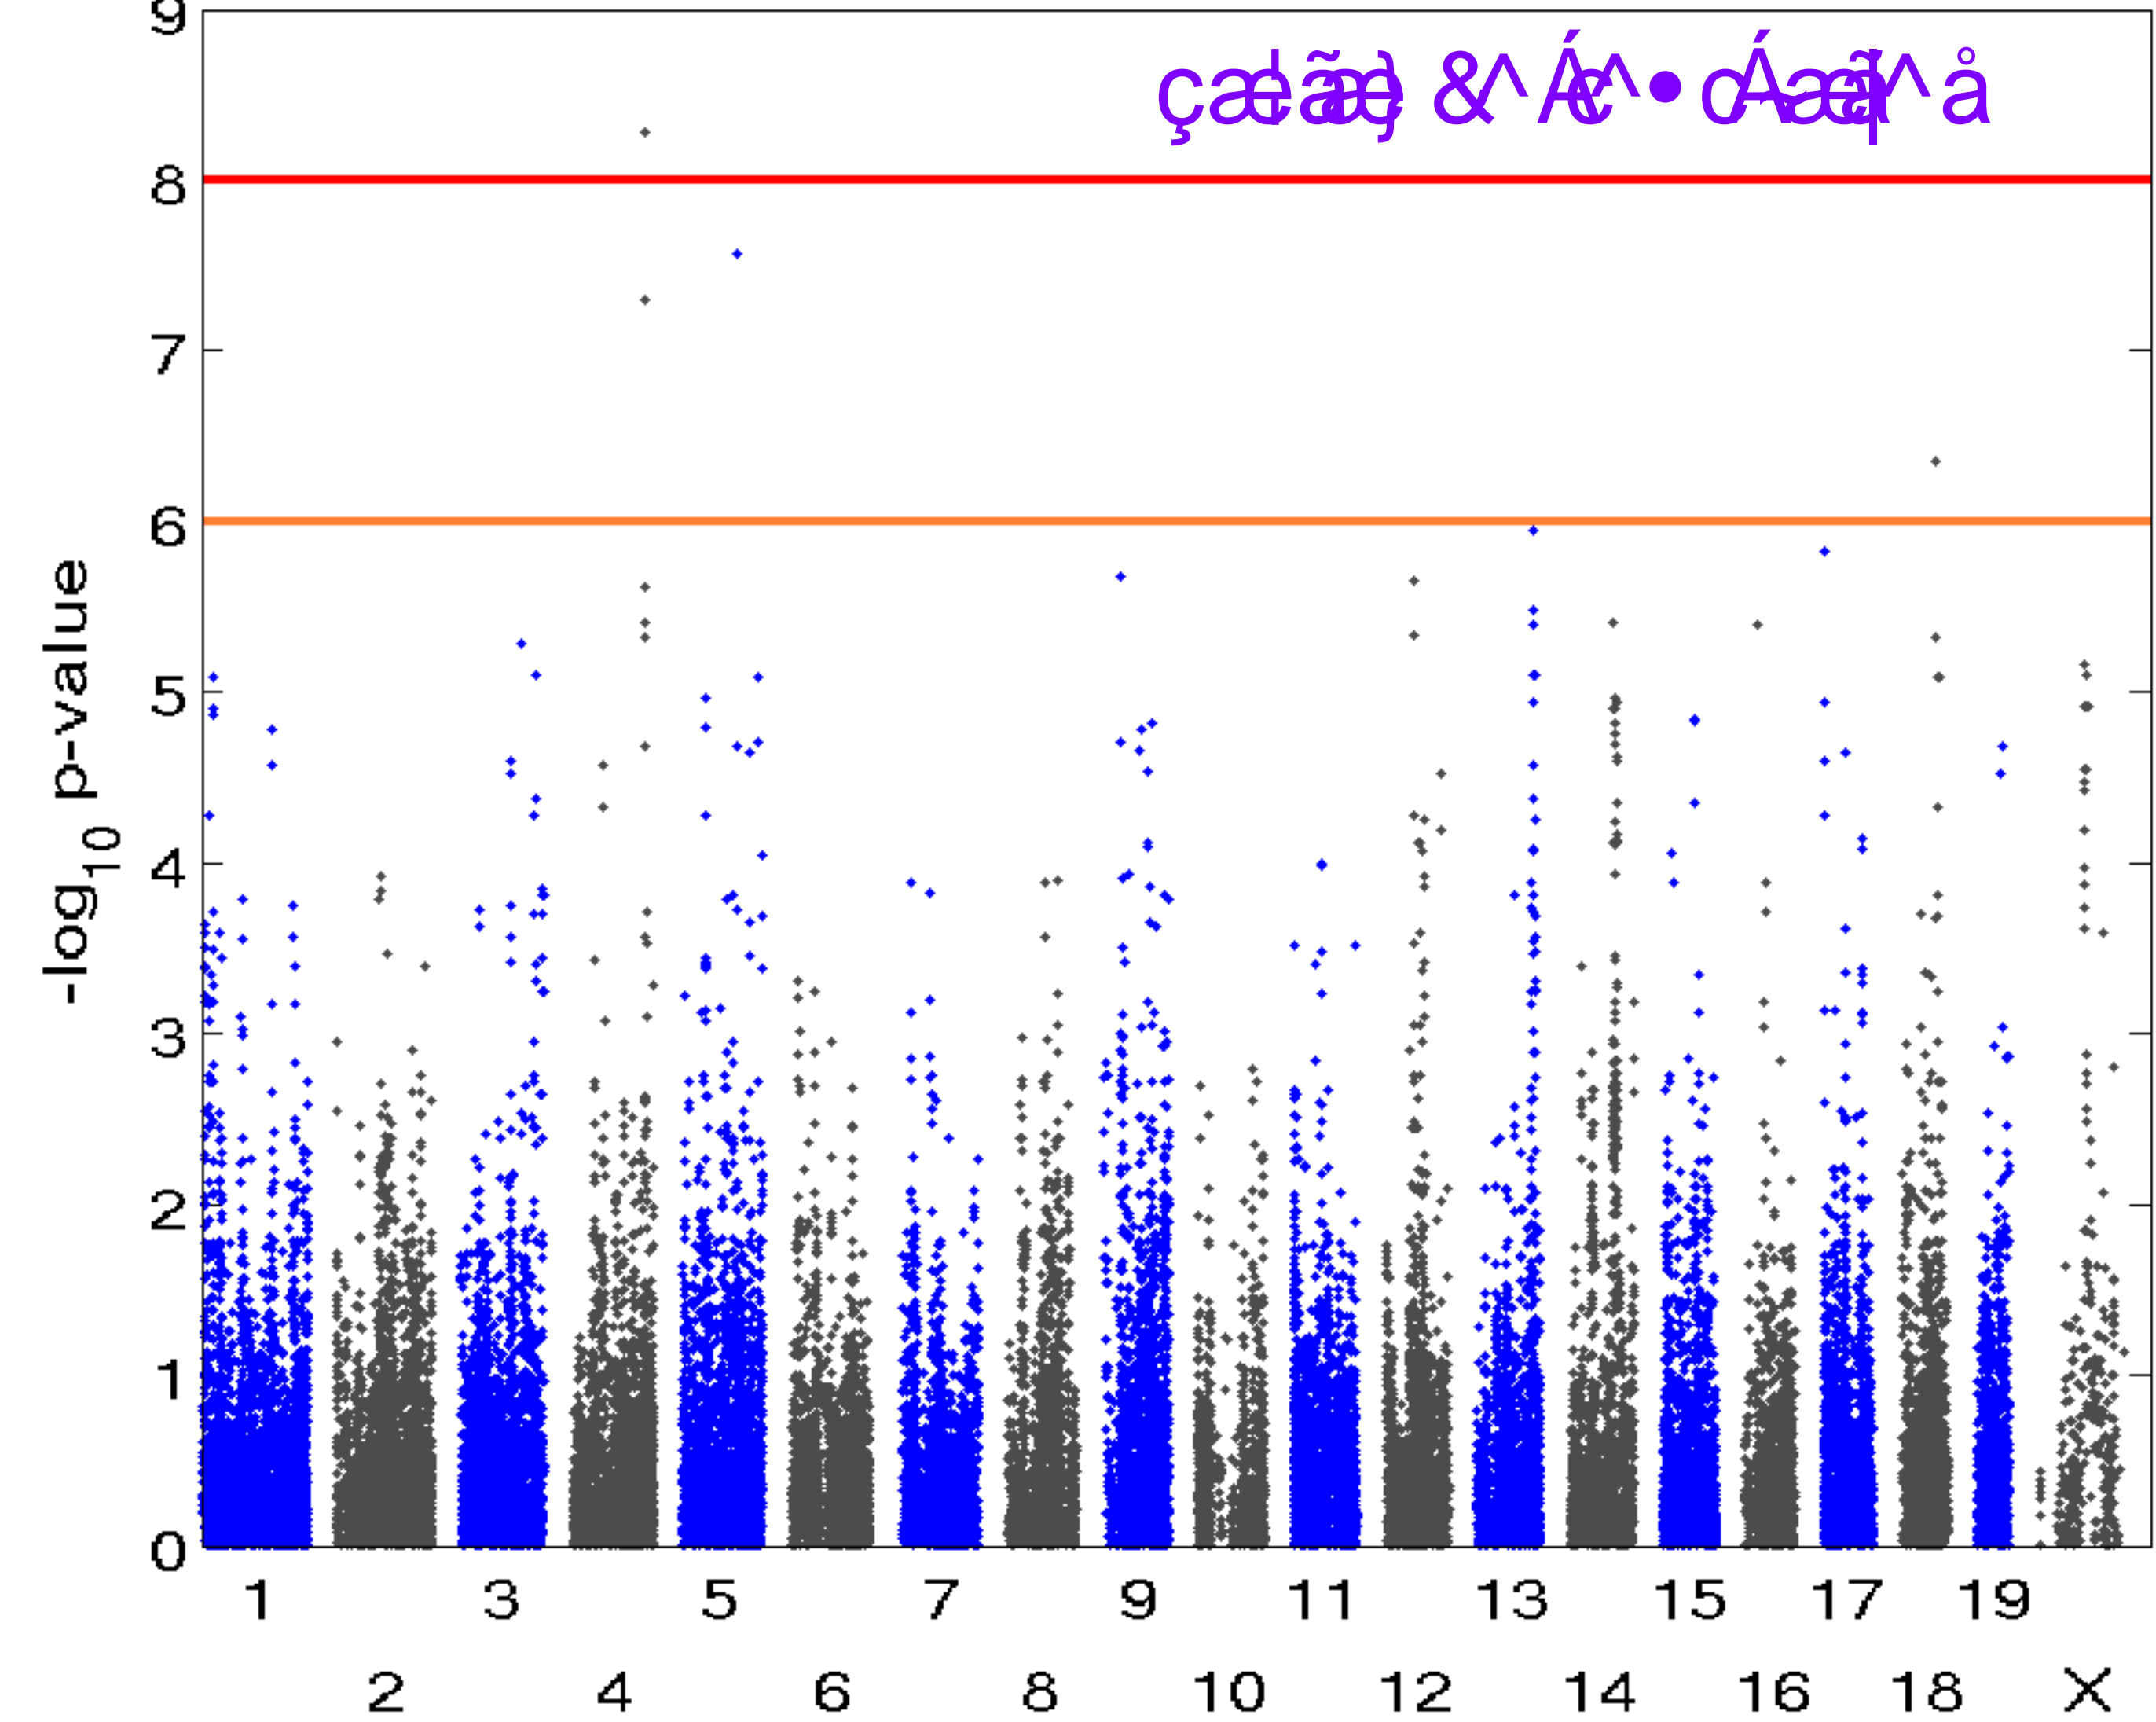

Qamp - iso10 vs ate

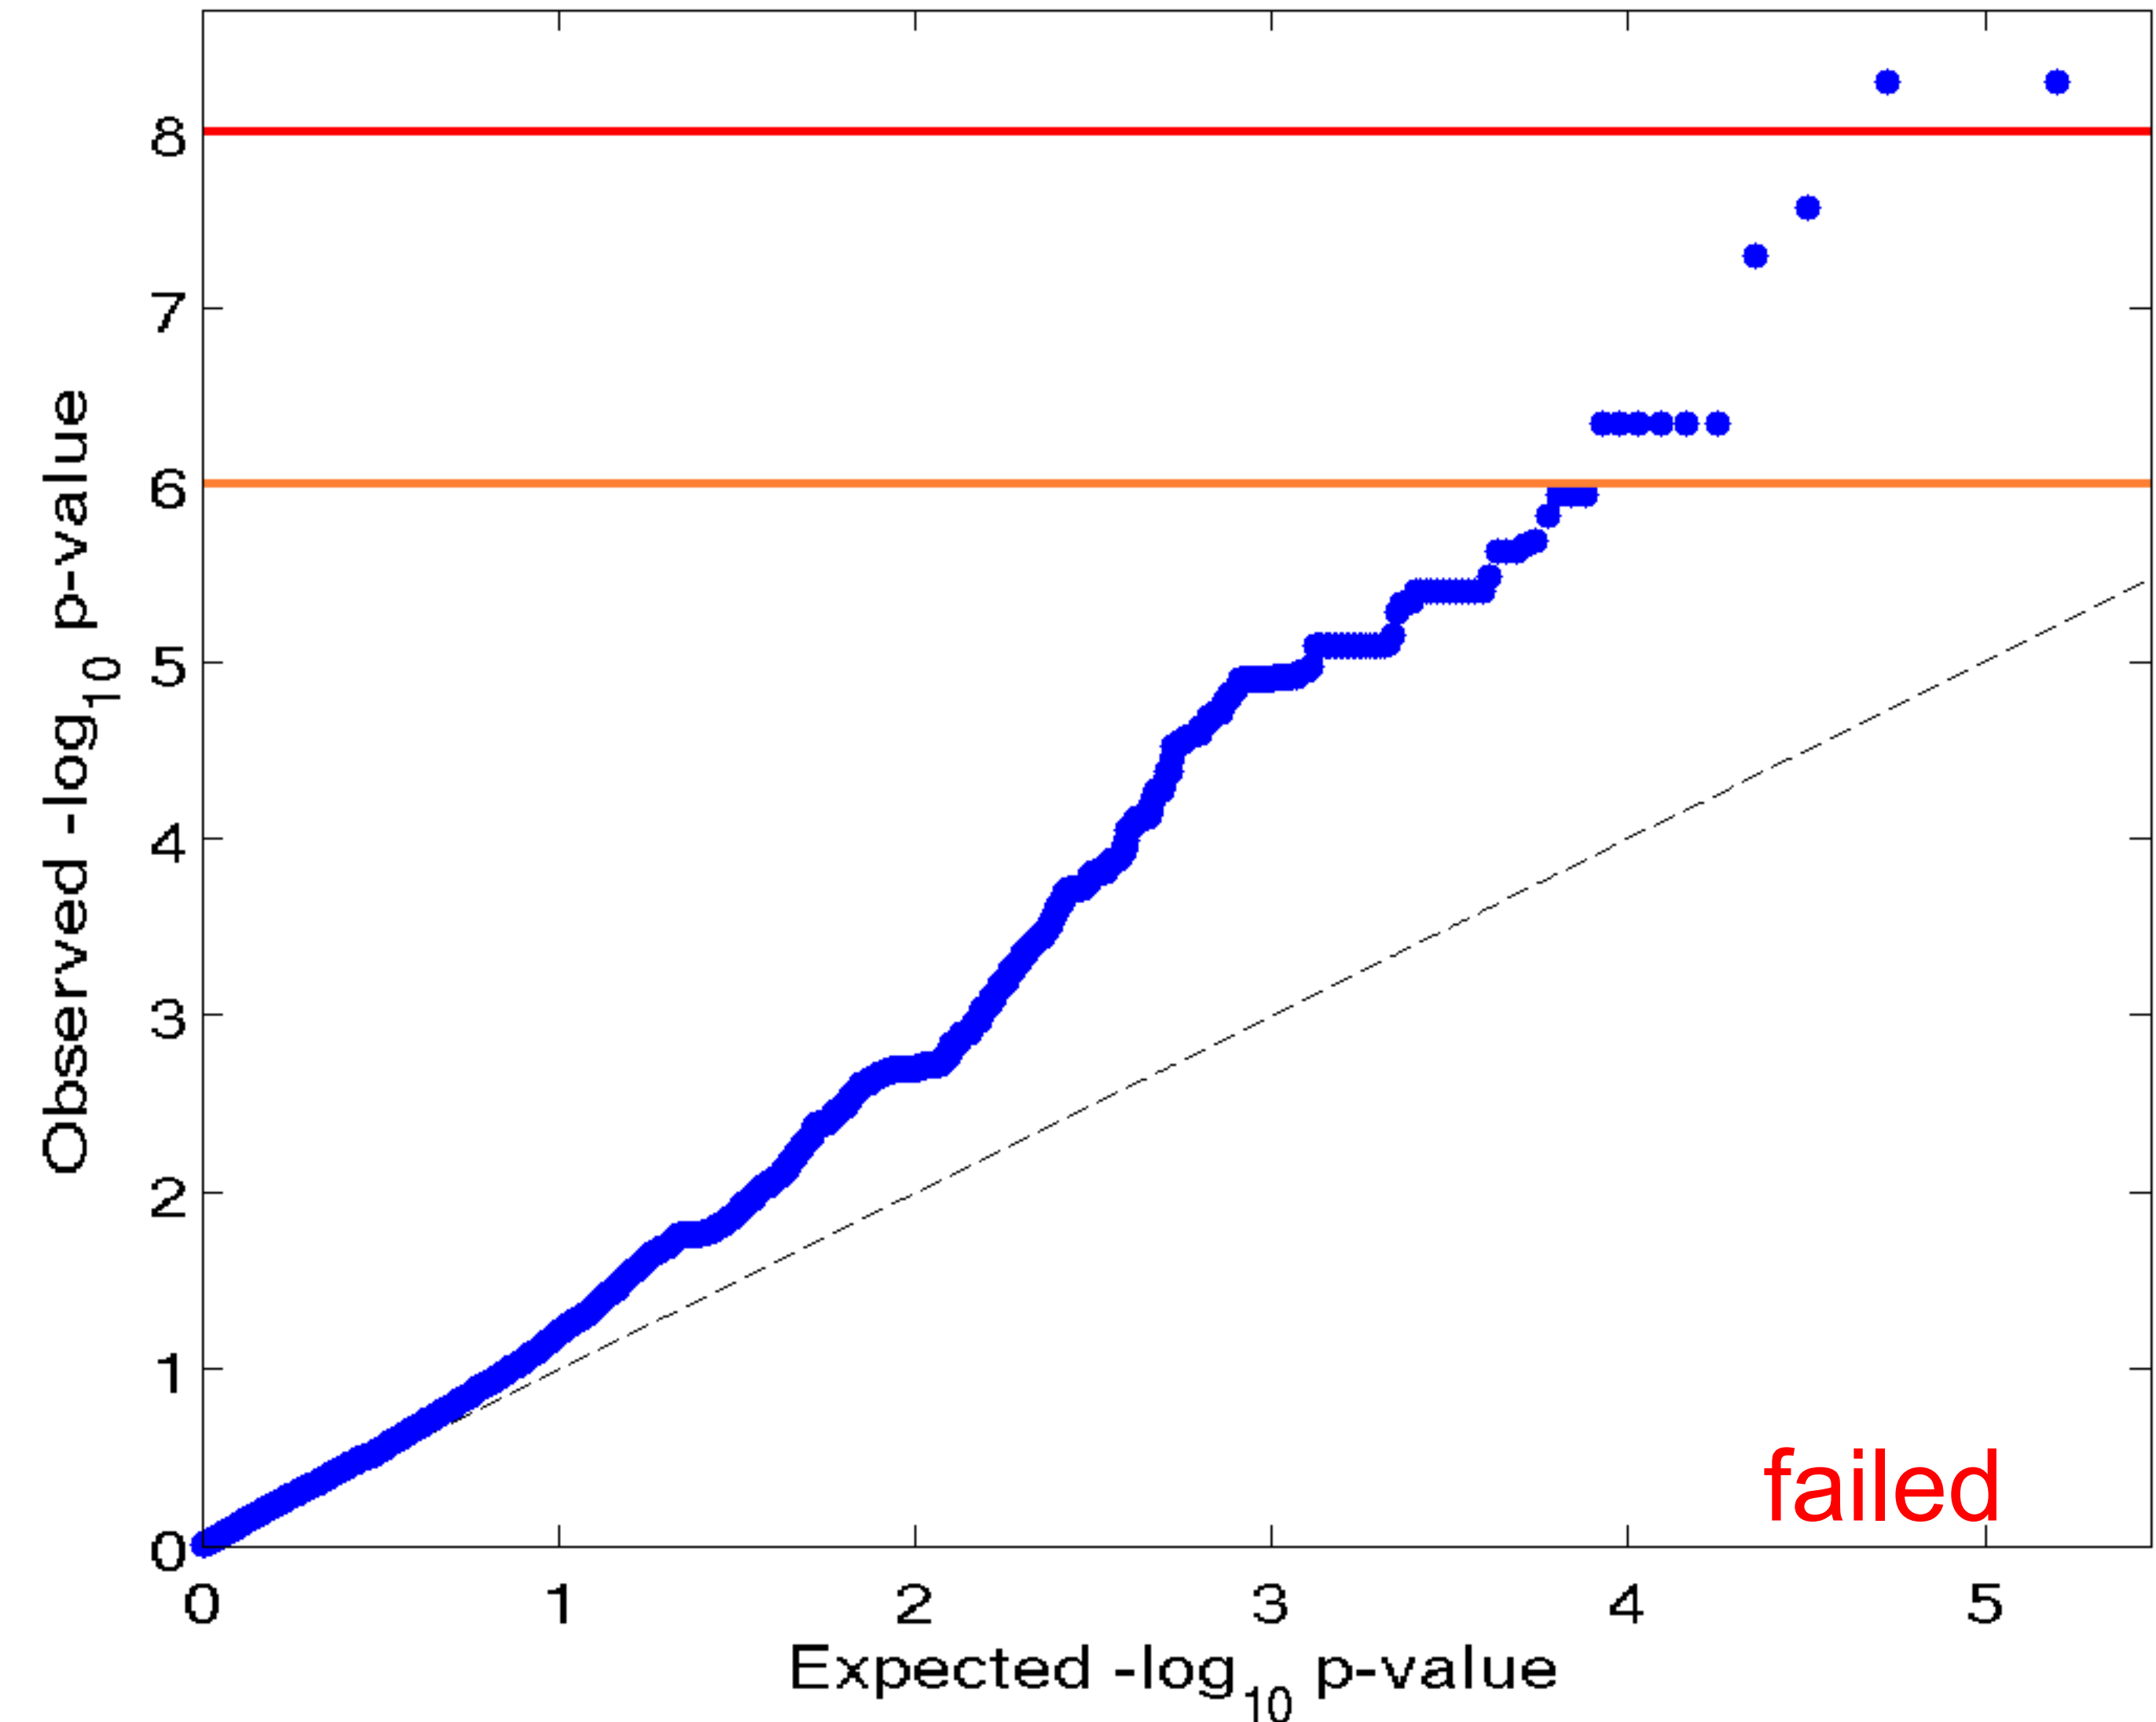



QRSarea - iso10 vs ate

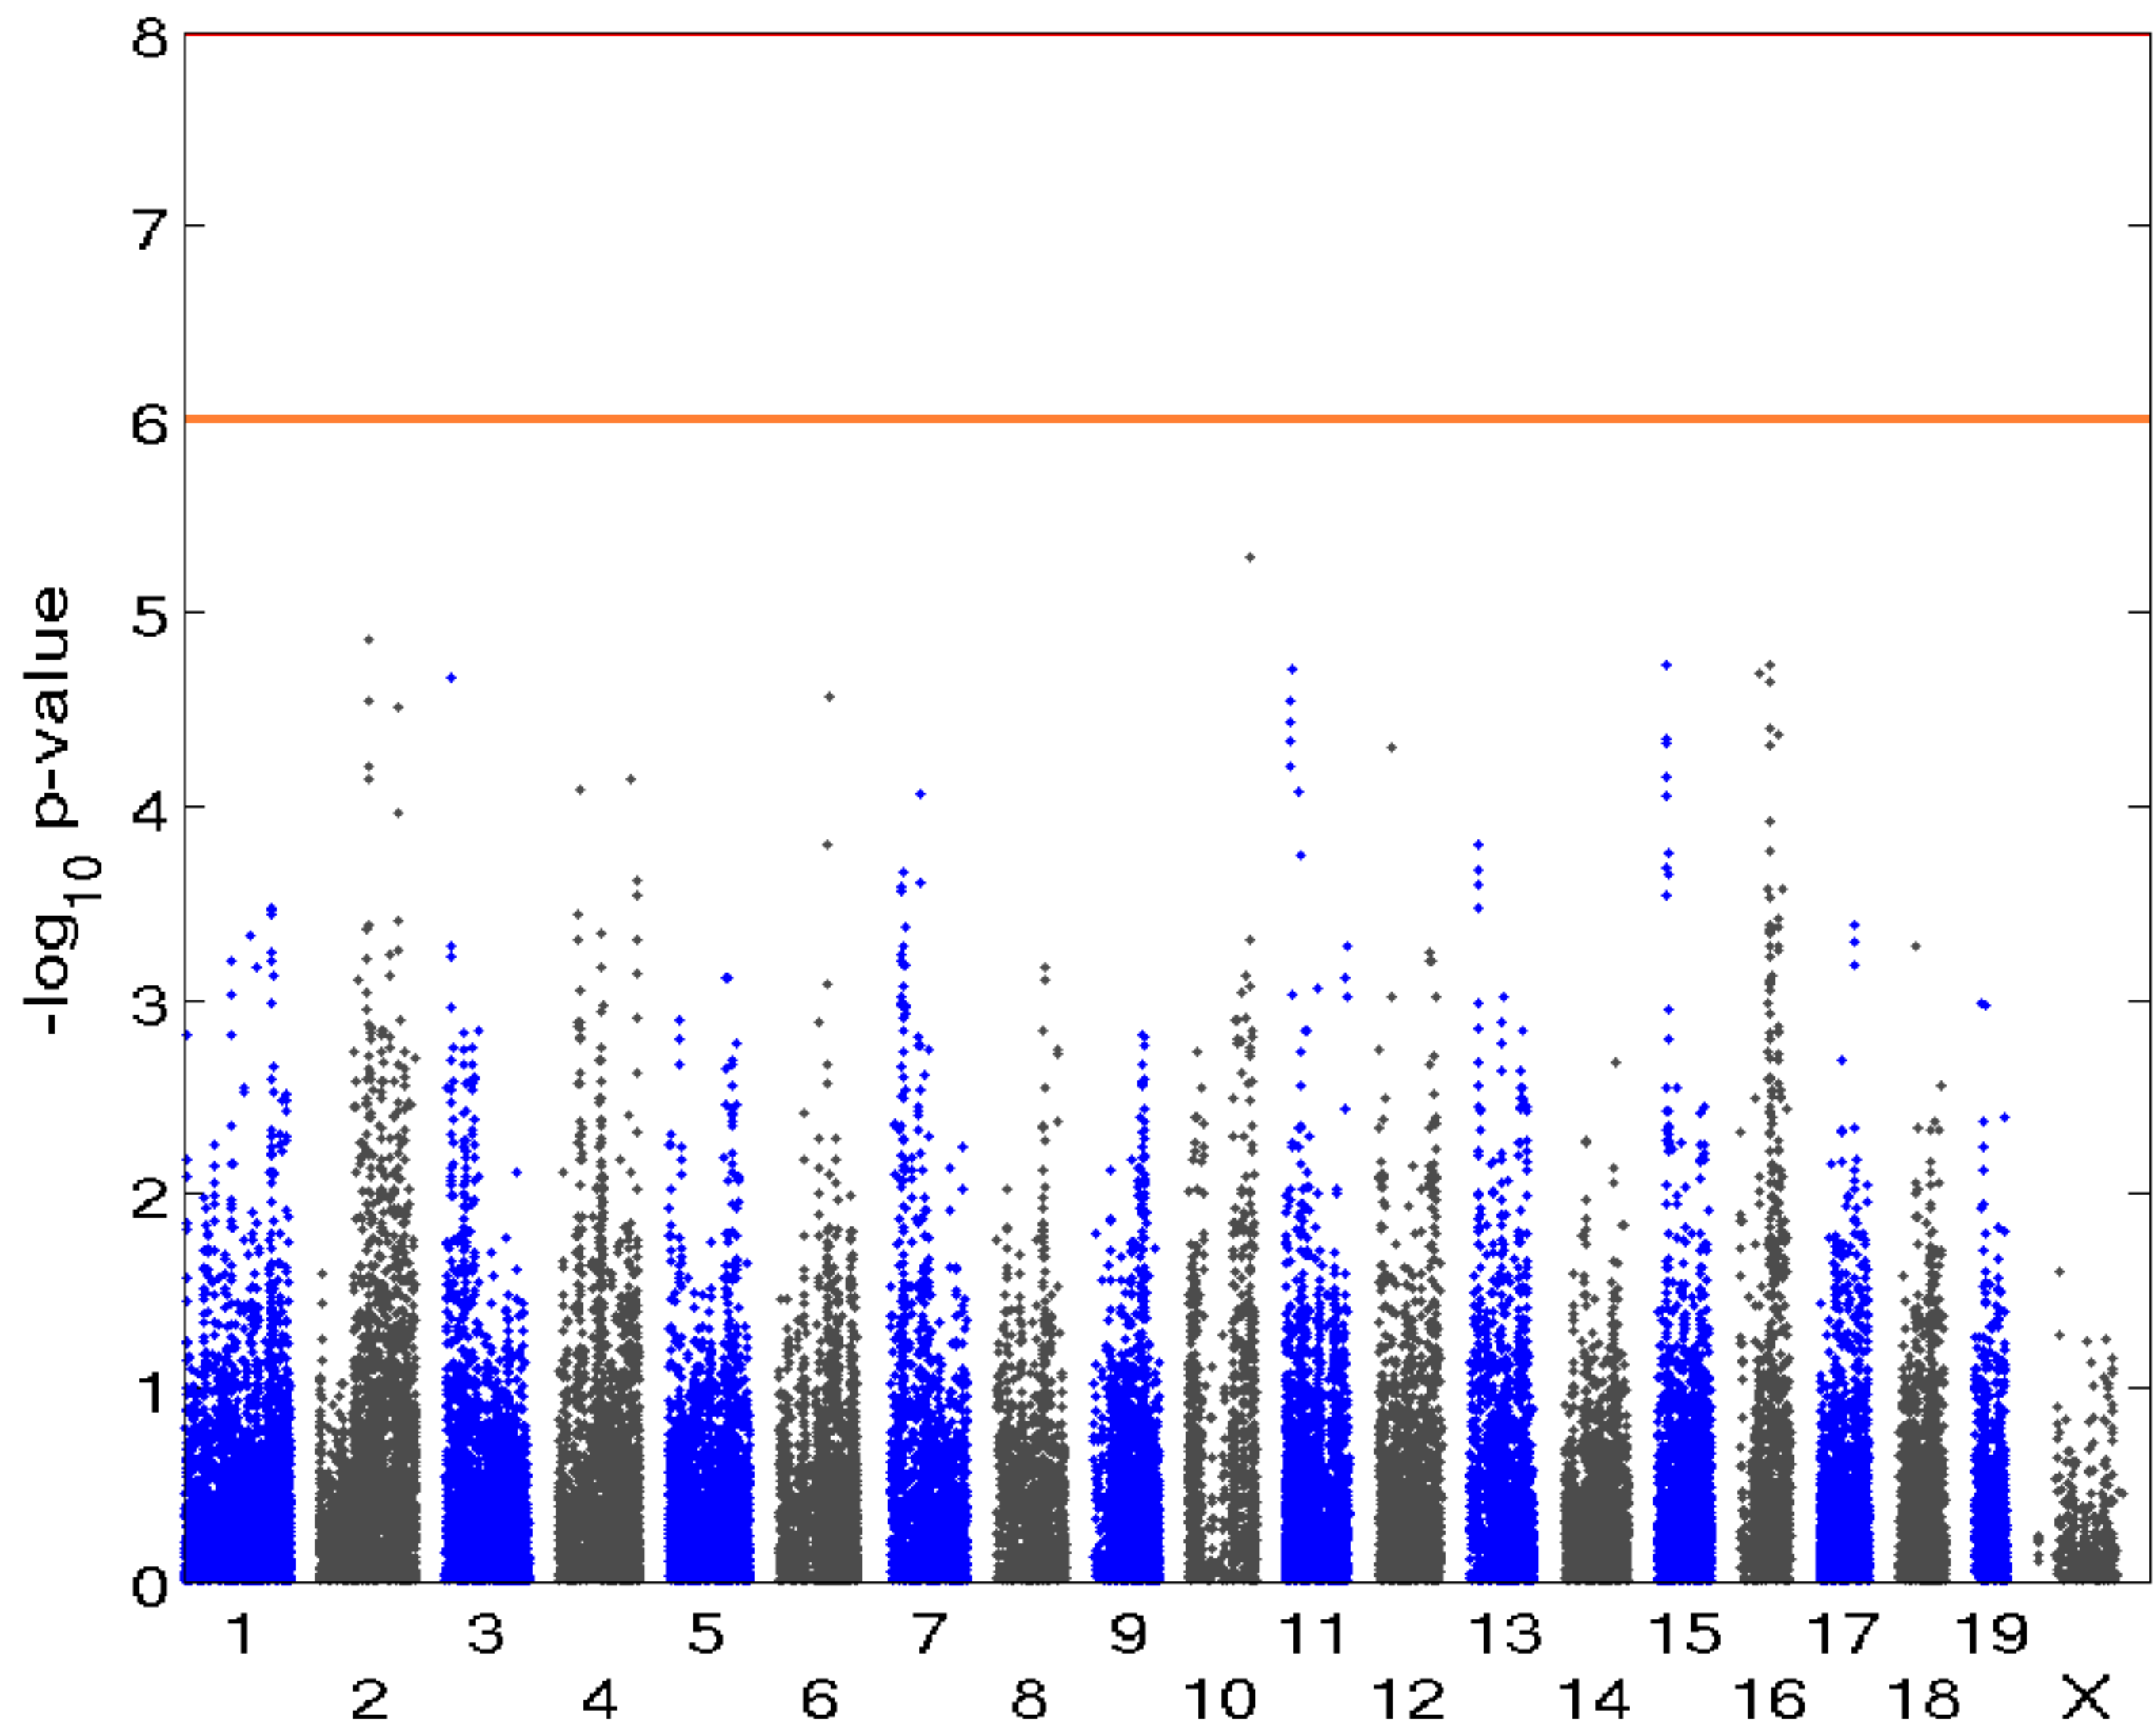

QRSarea - iso10 vs ate

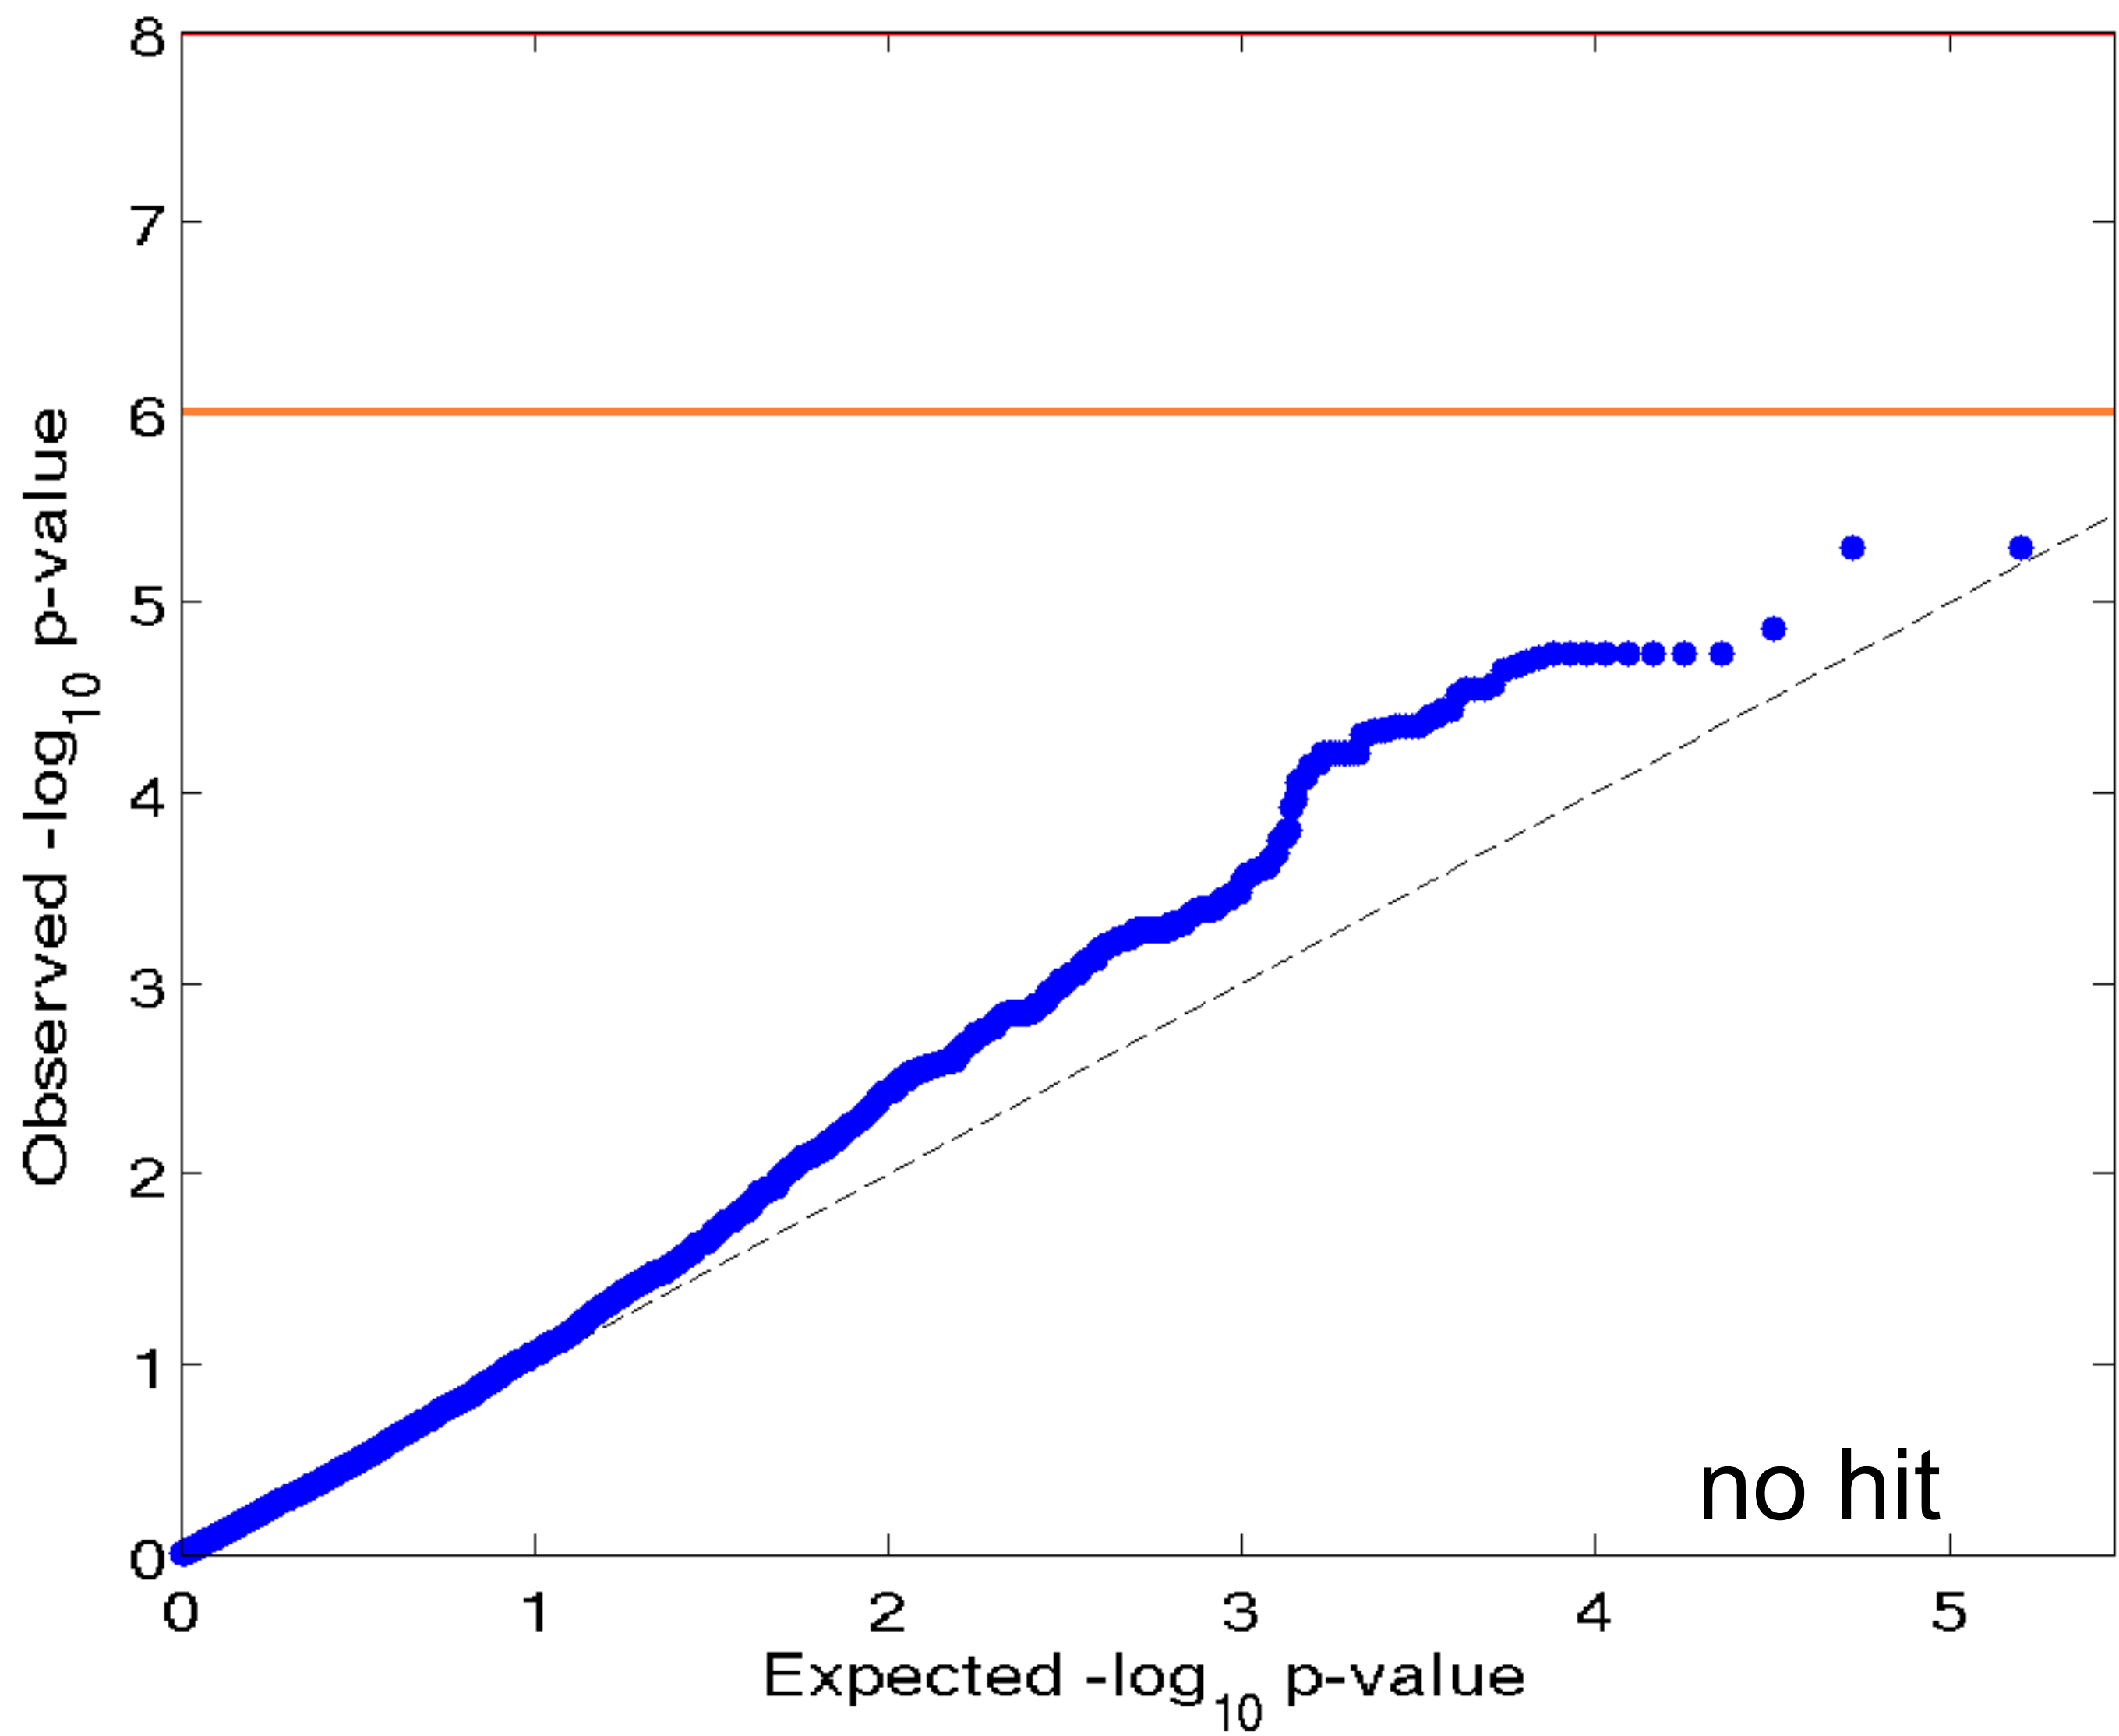

QRS - iso10 vs ate

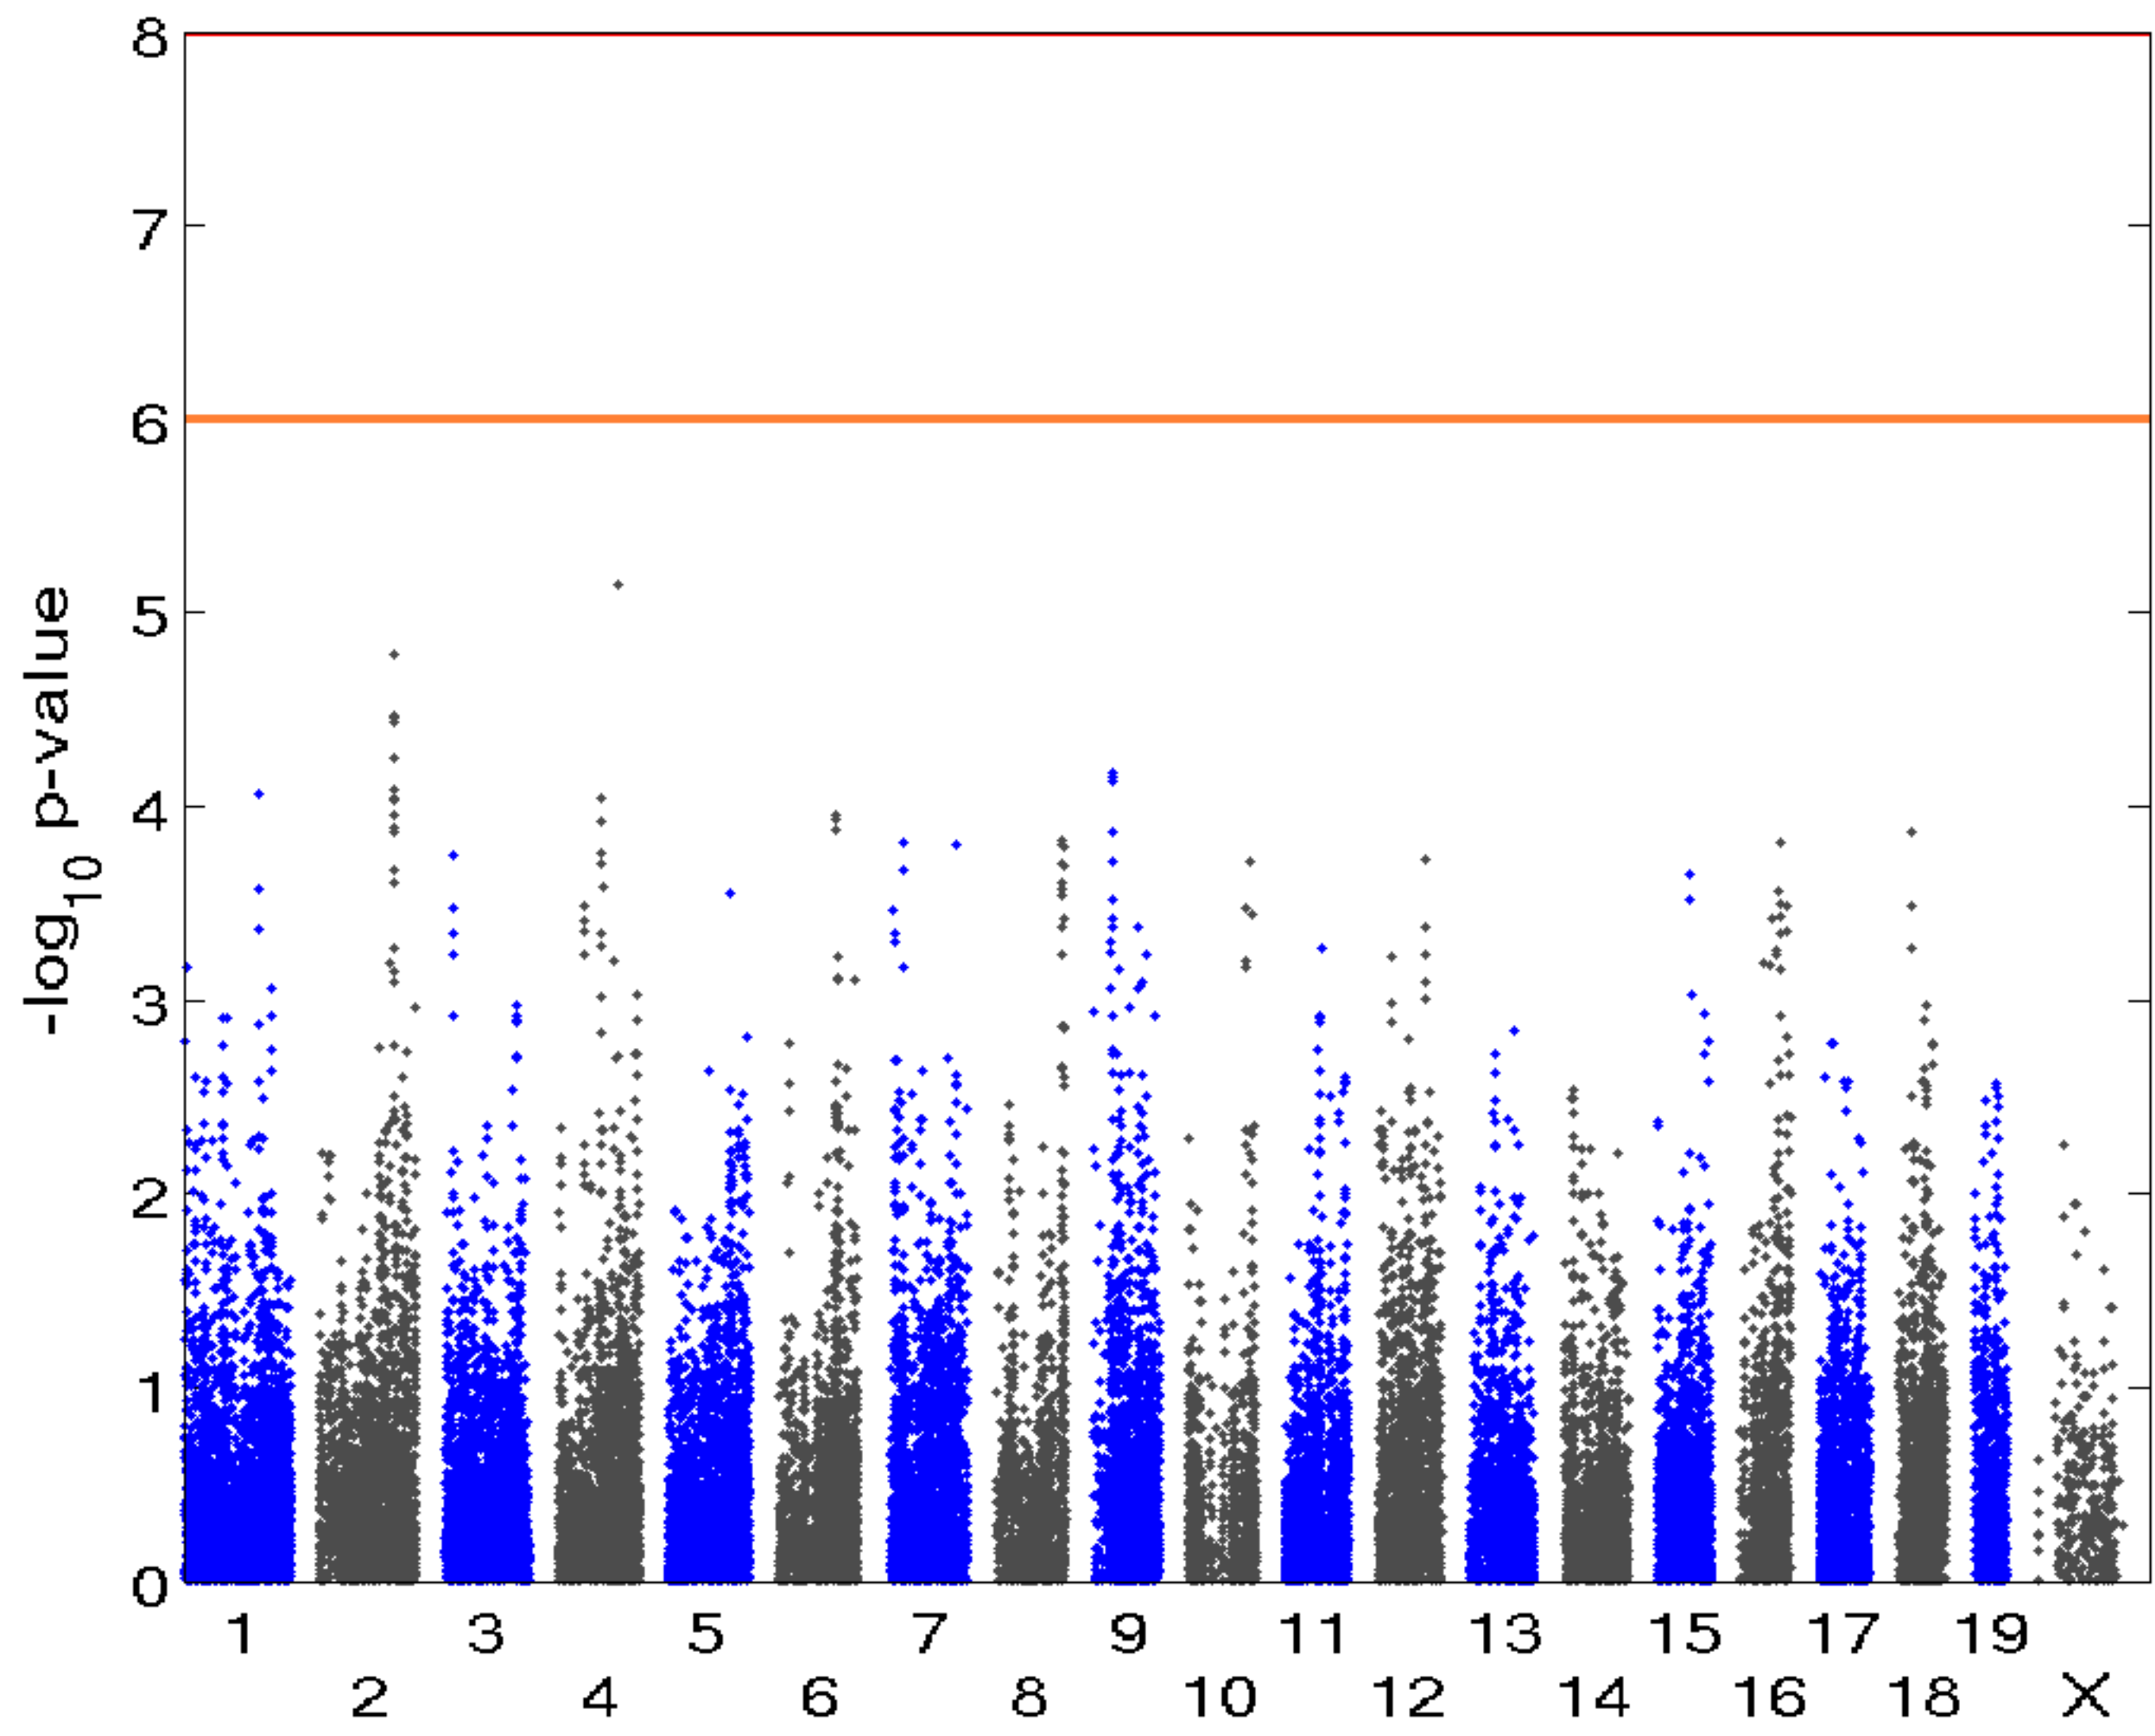

QRS - iso10 vs ate

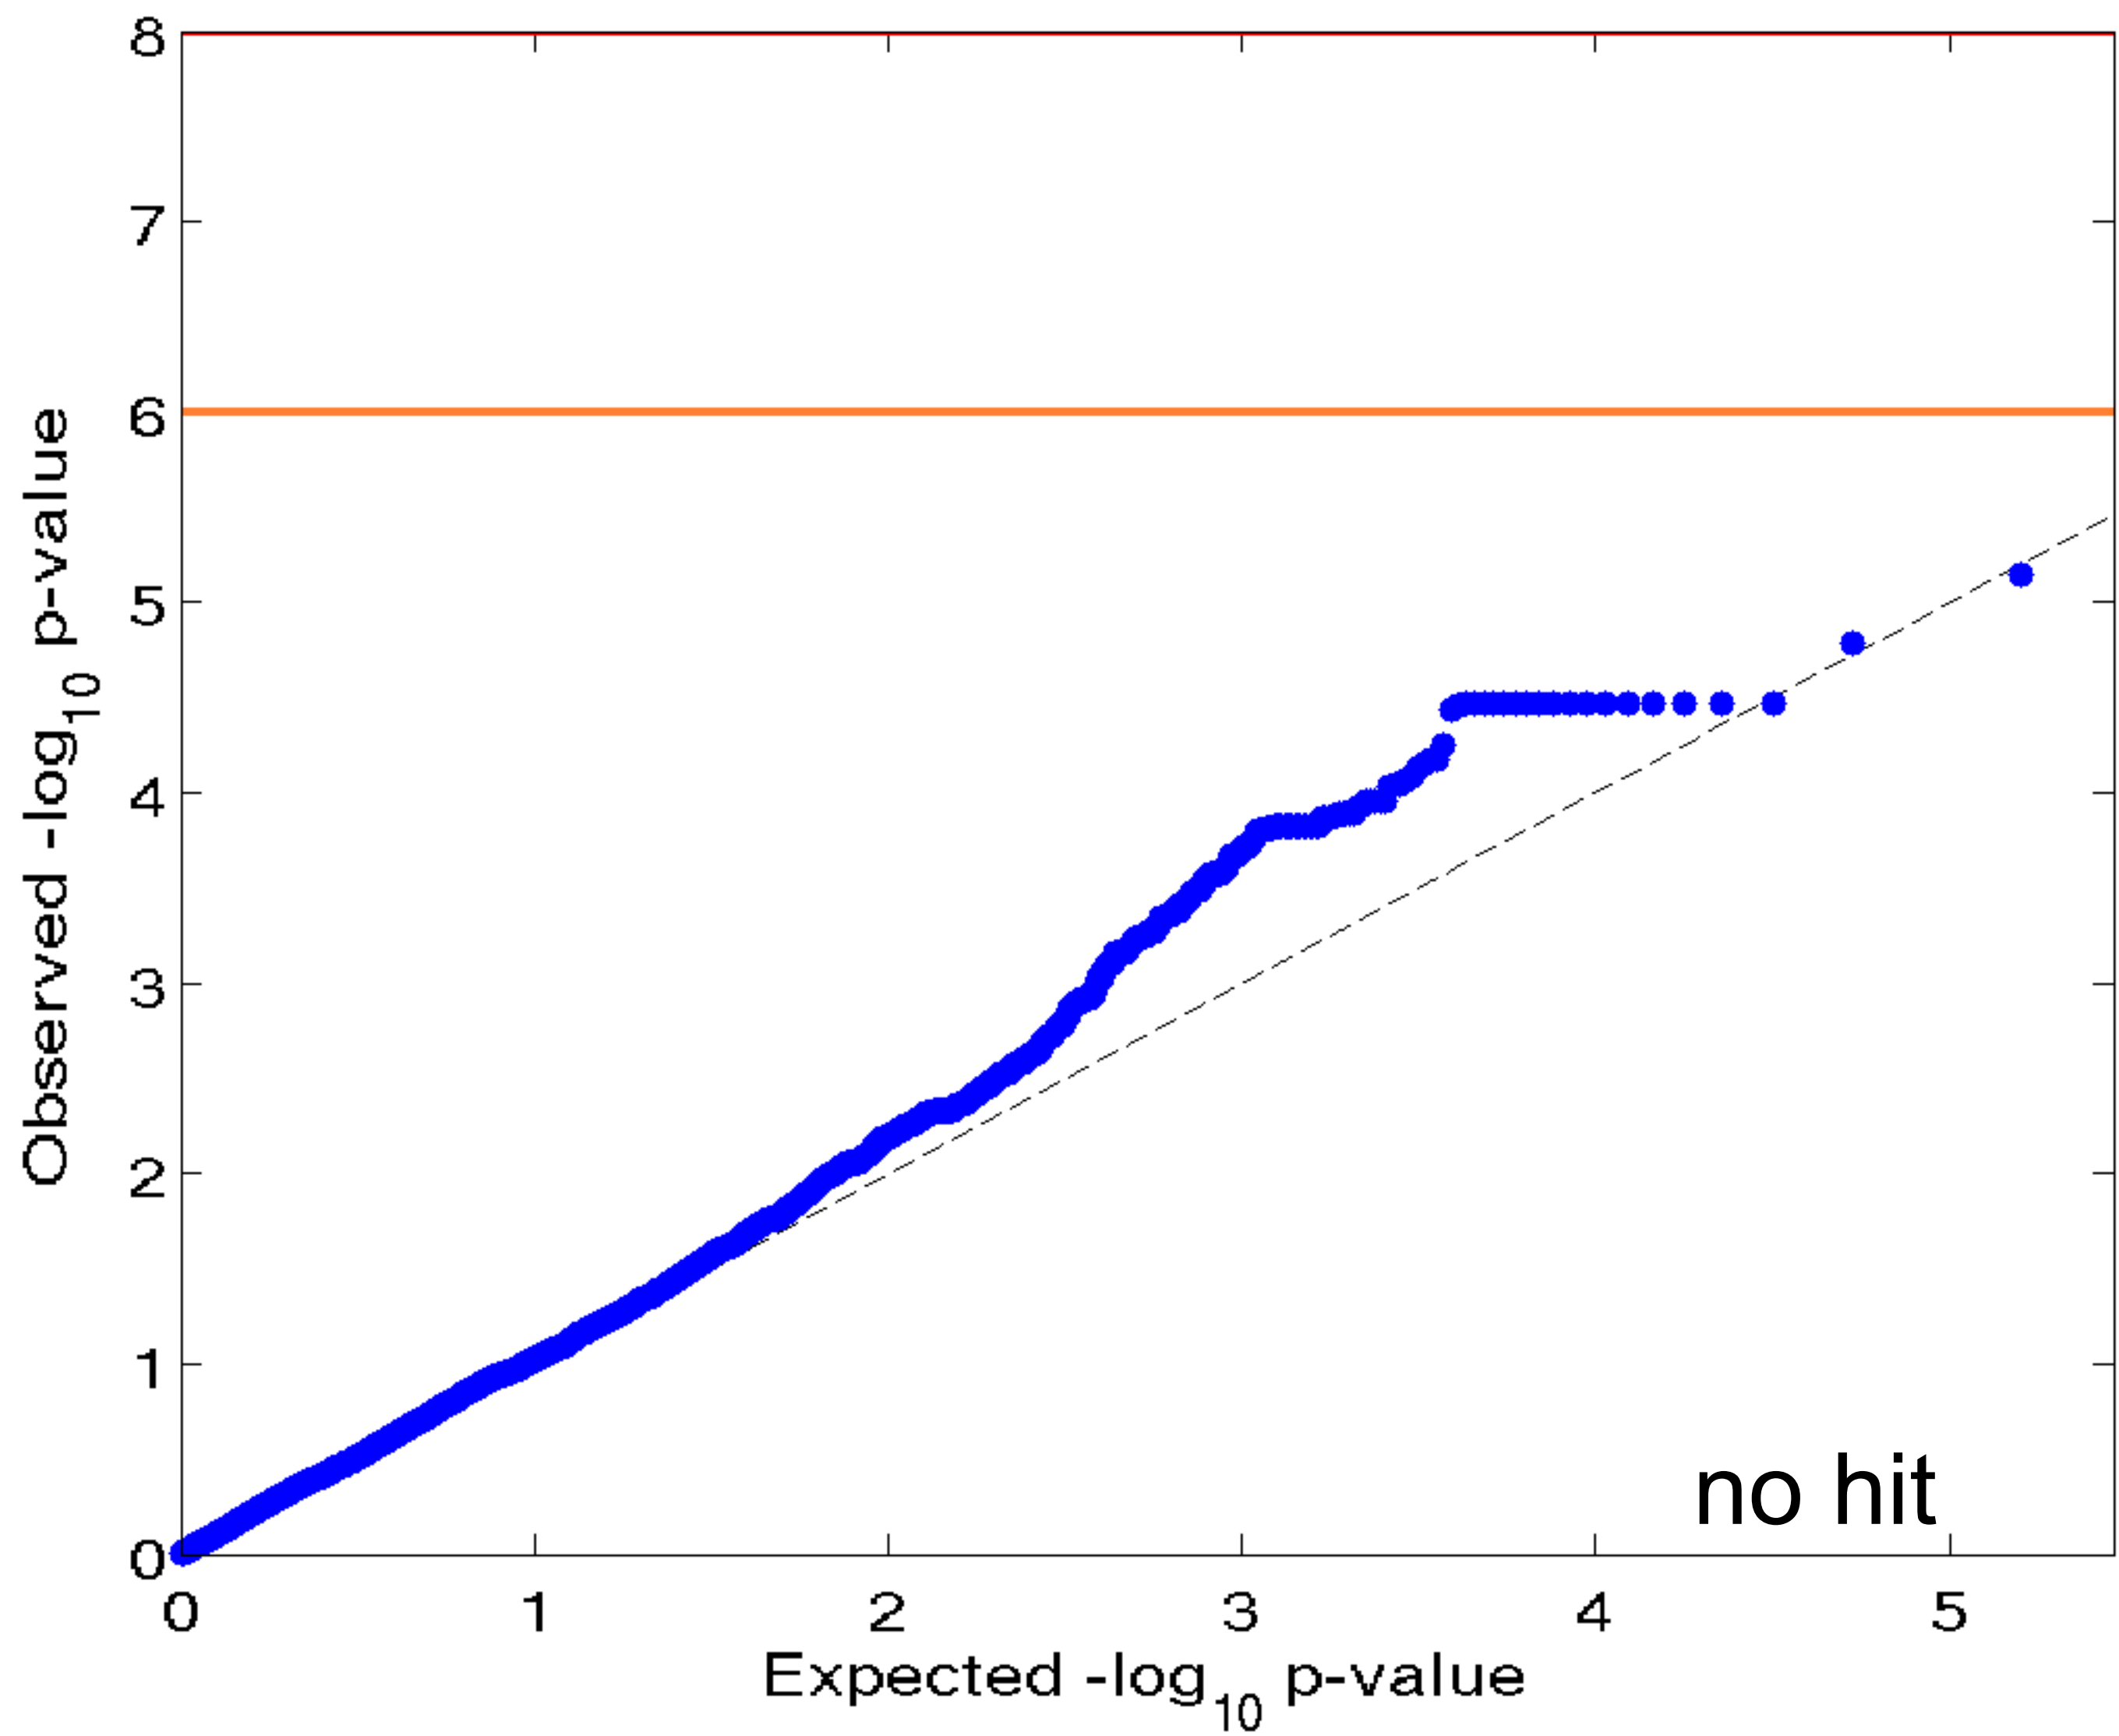

QTc - iso10 vs ate

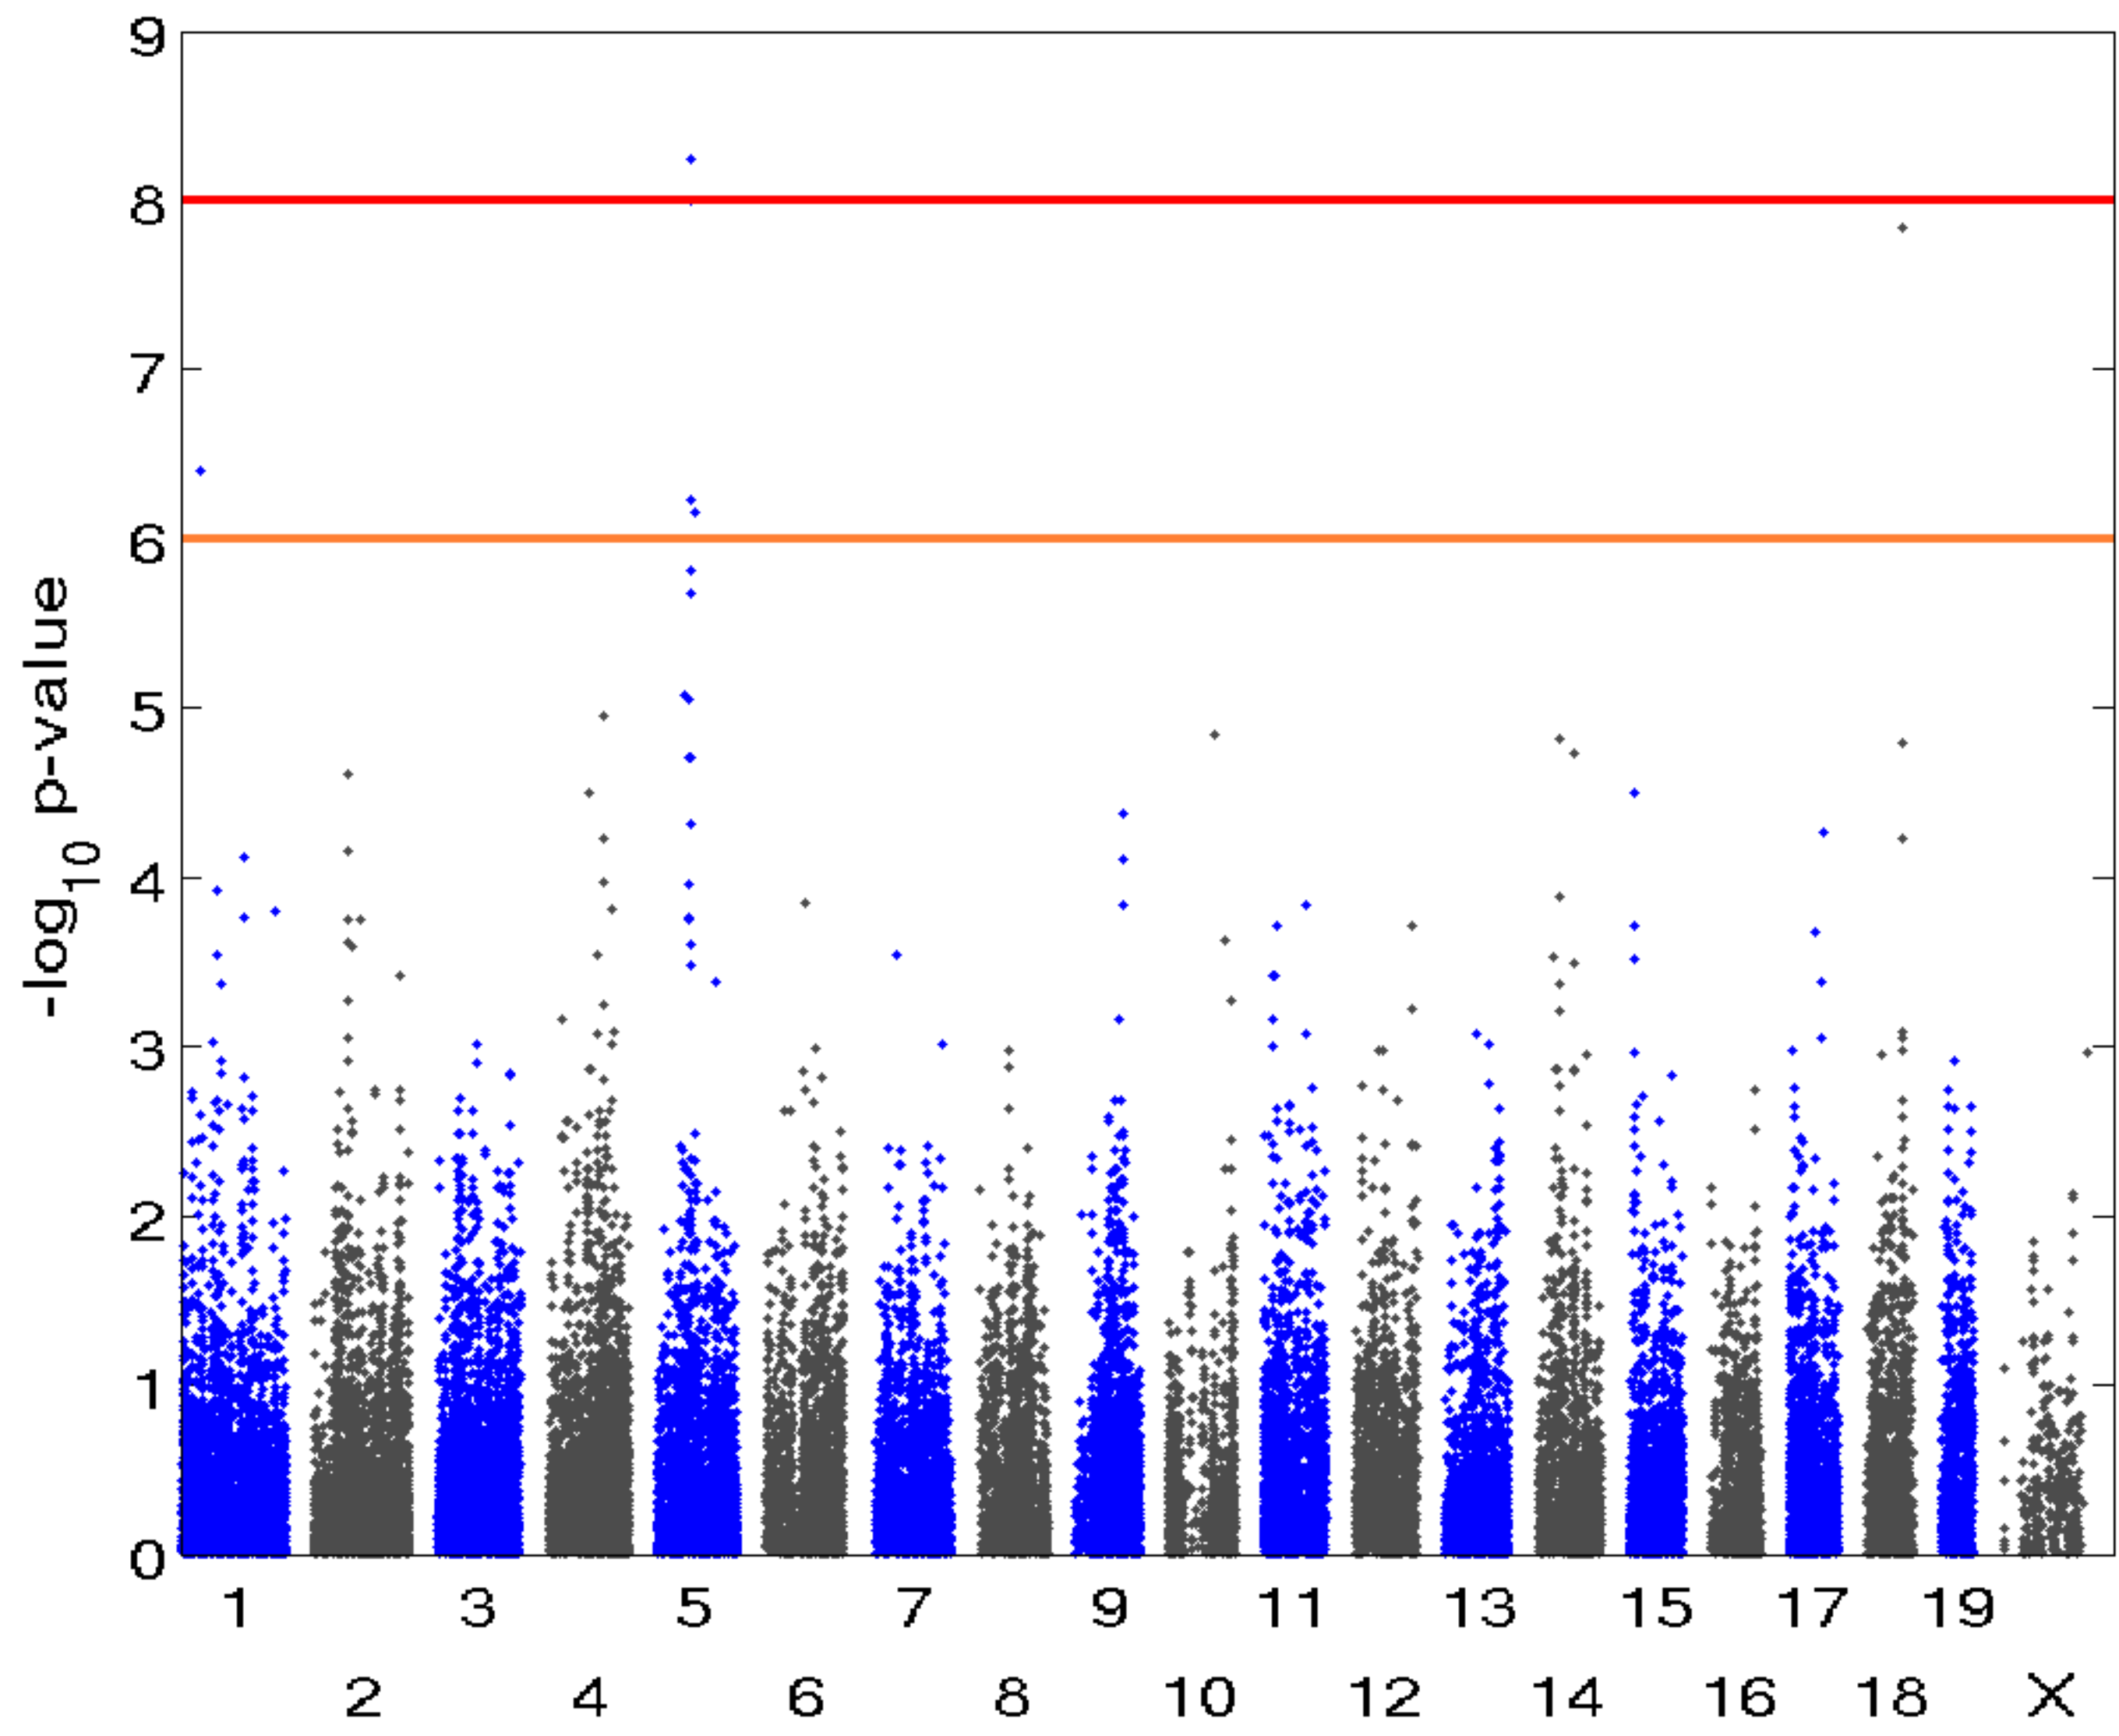

QTc - iso10 vs ate

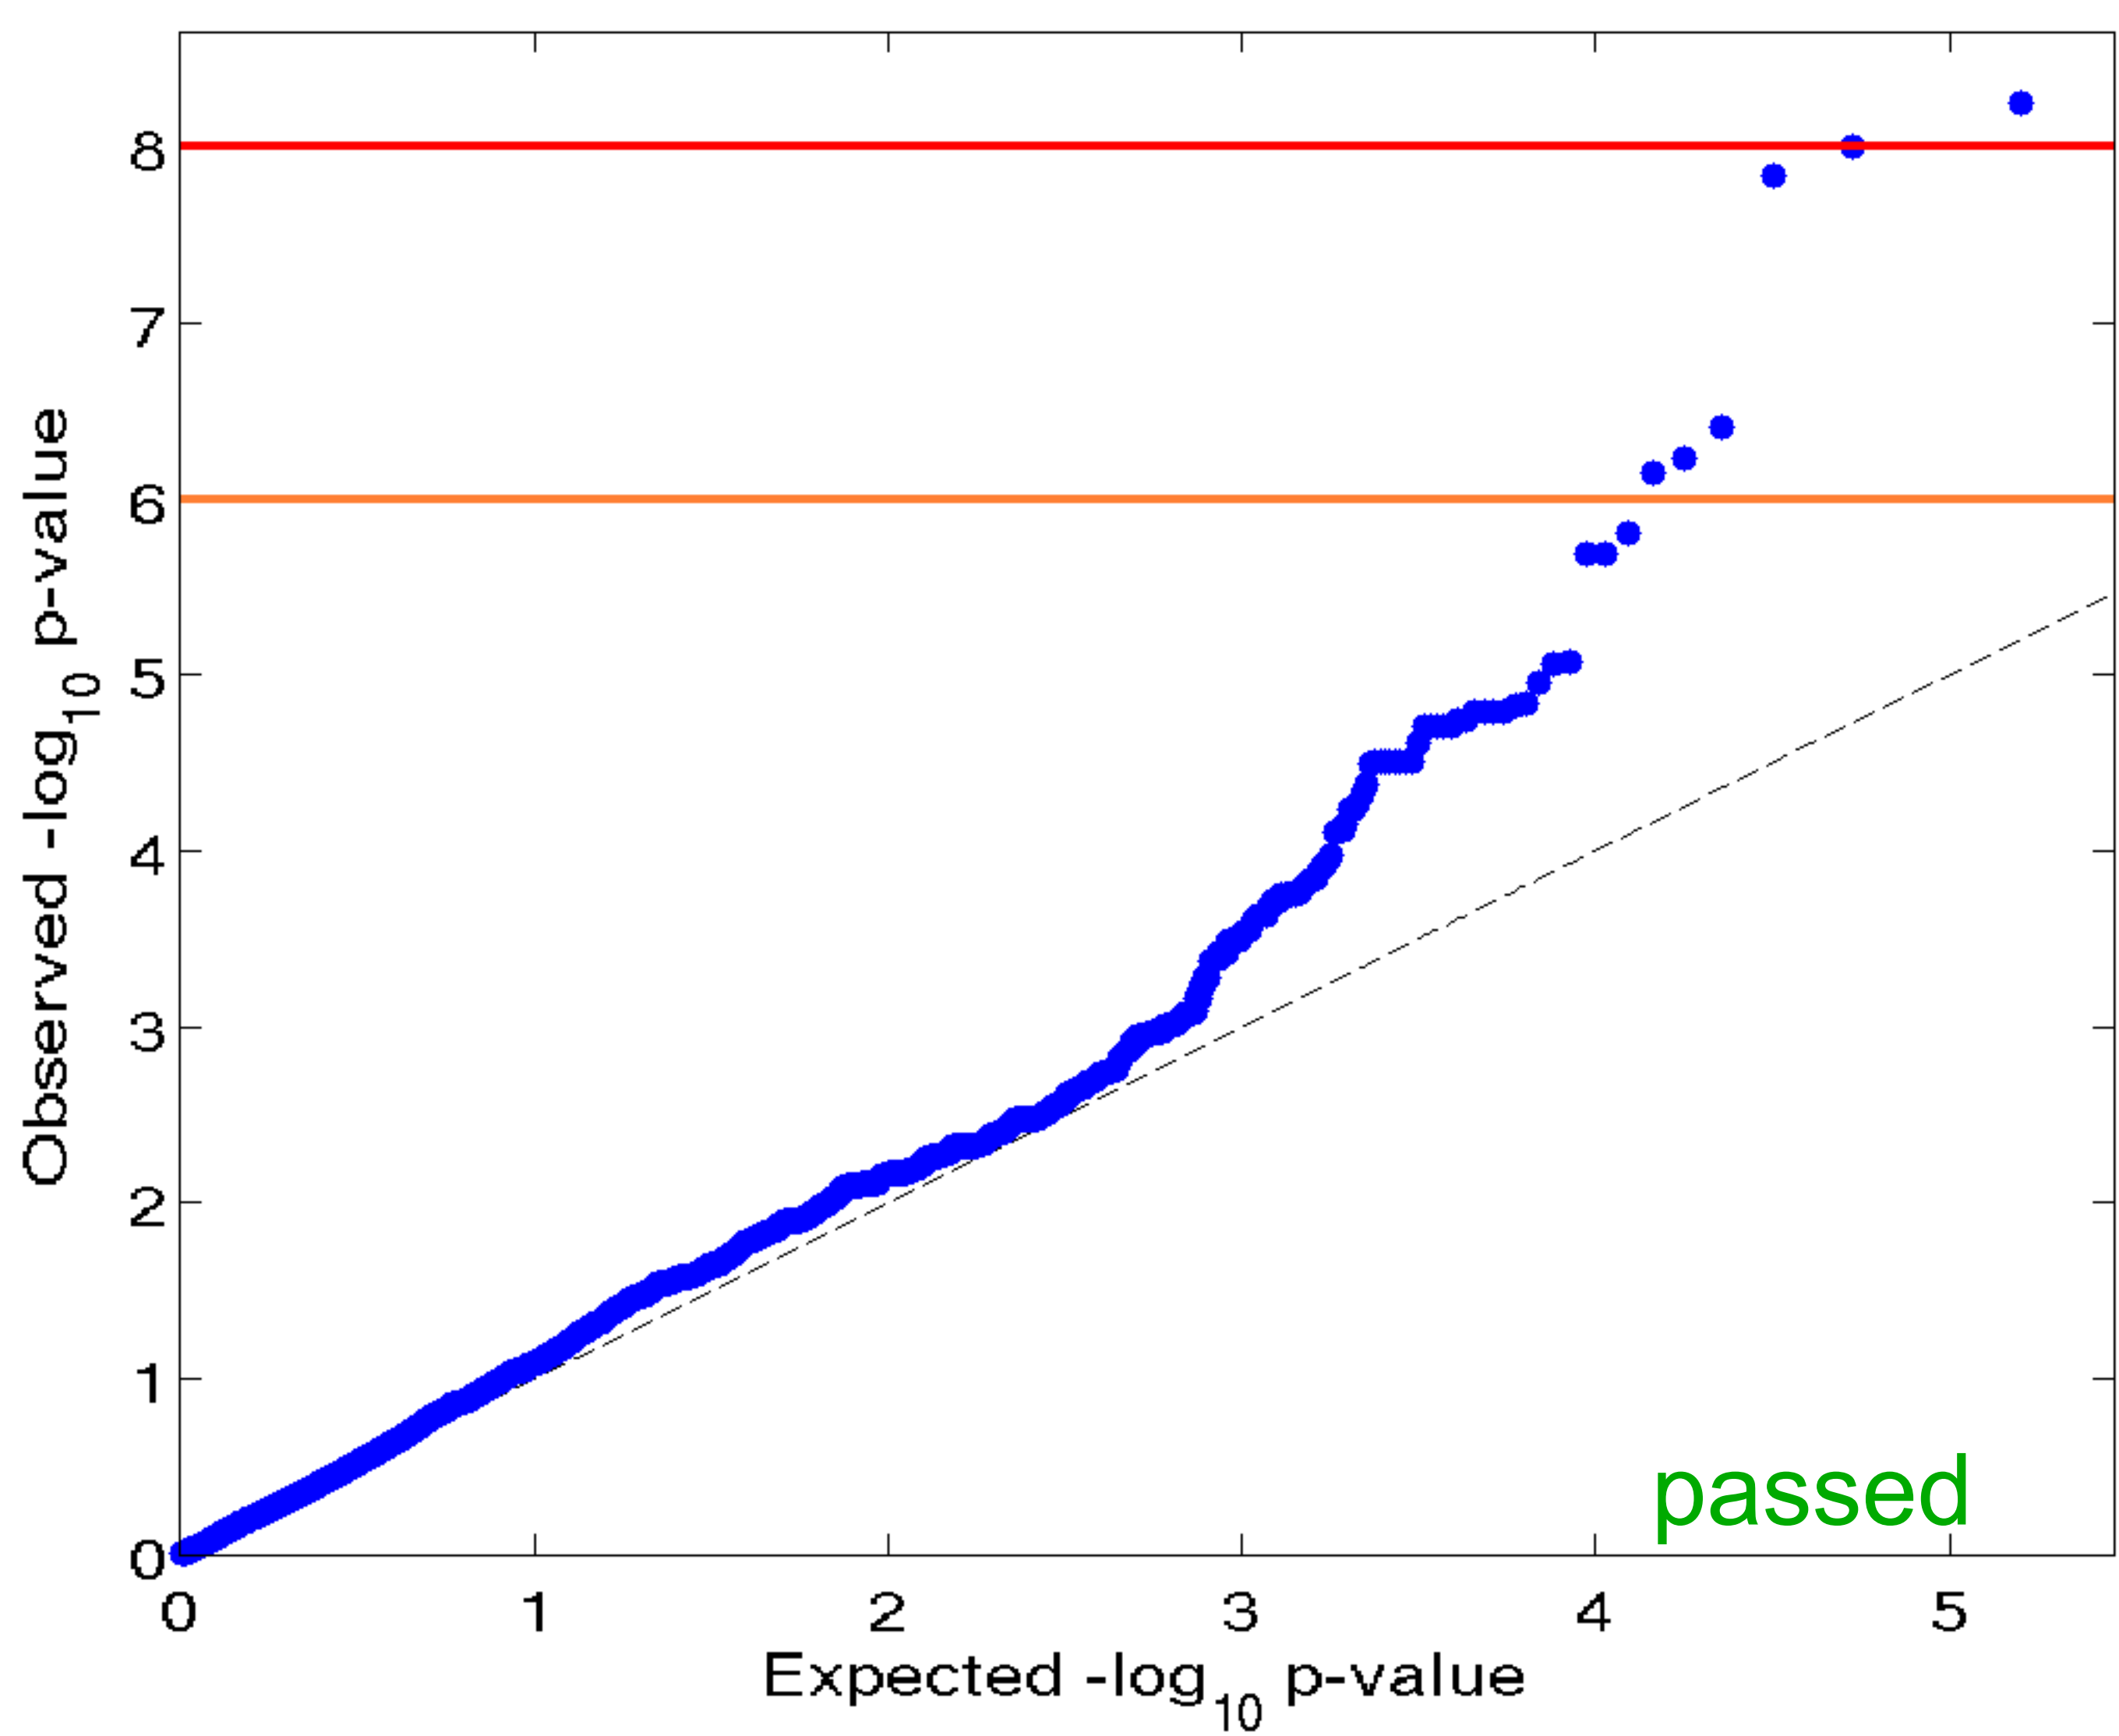

QT - iso10 vs ate

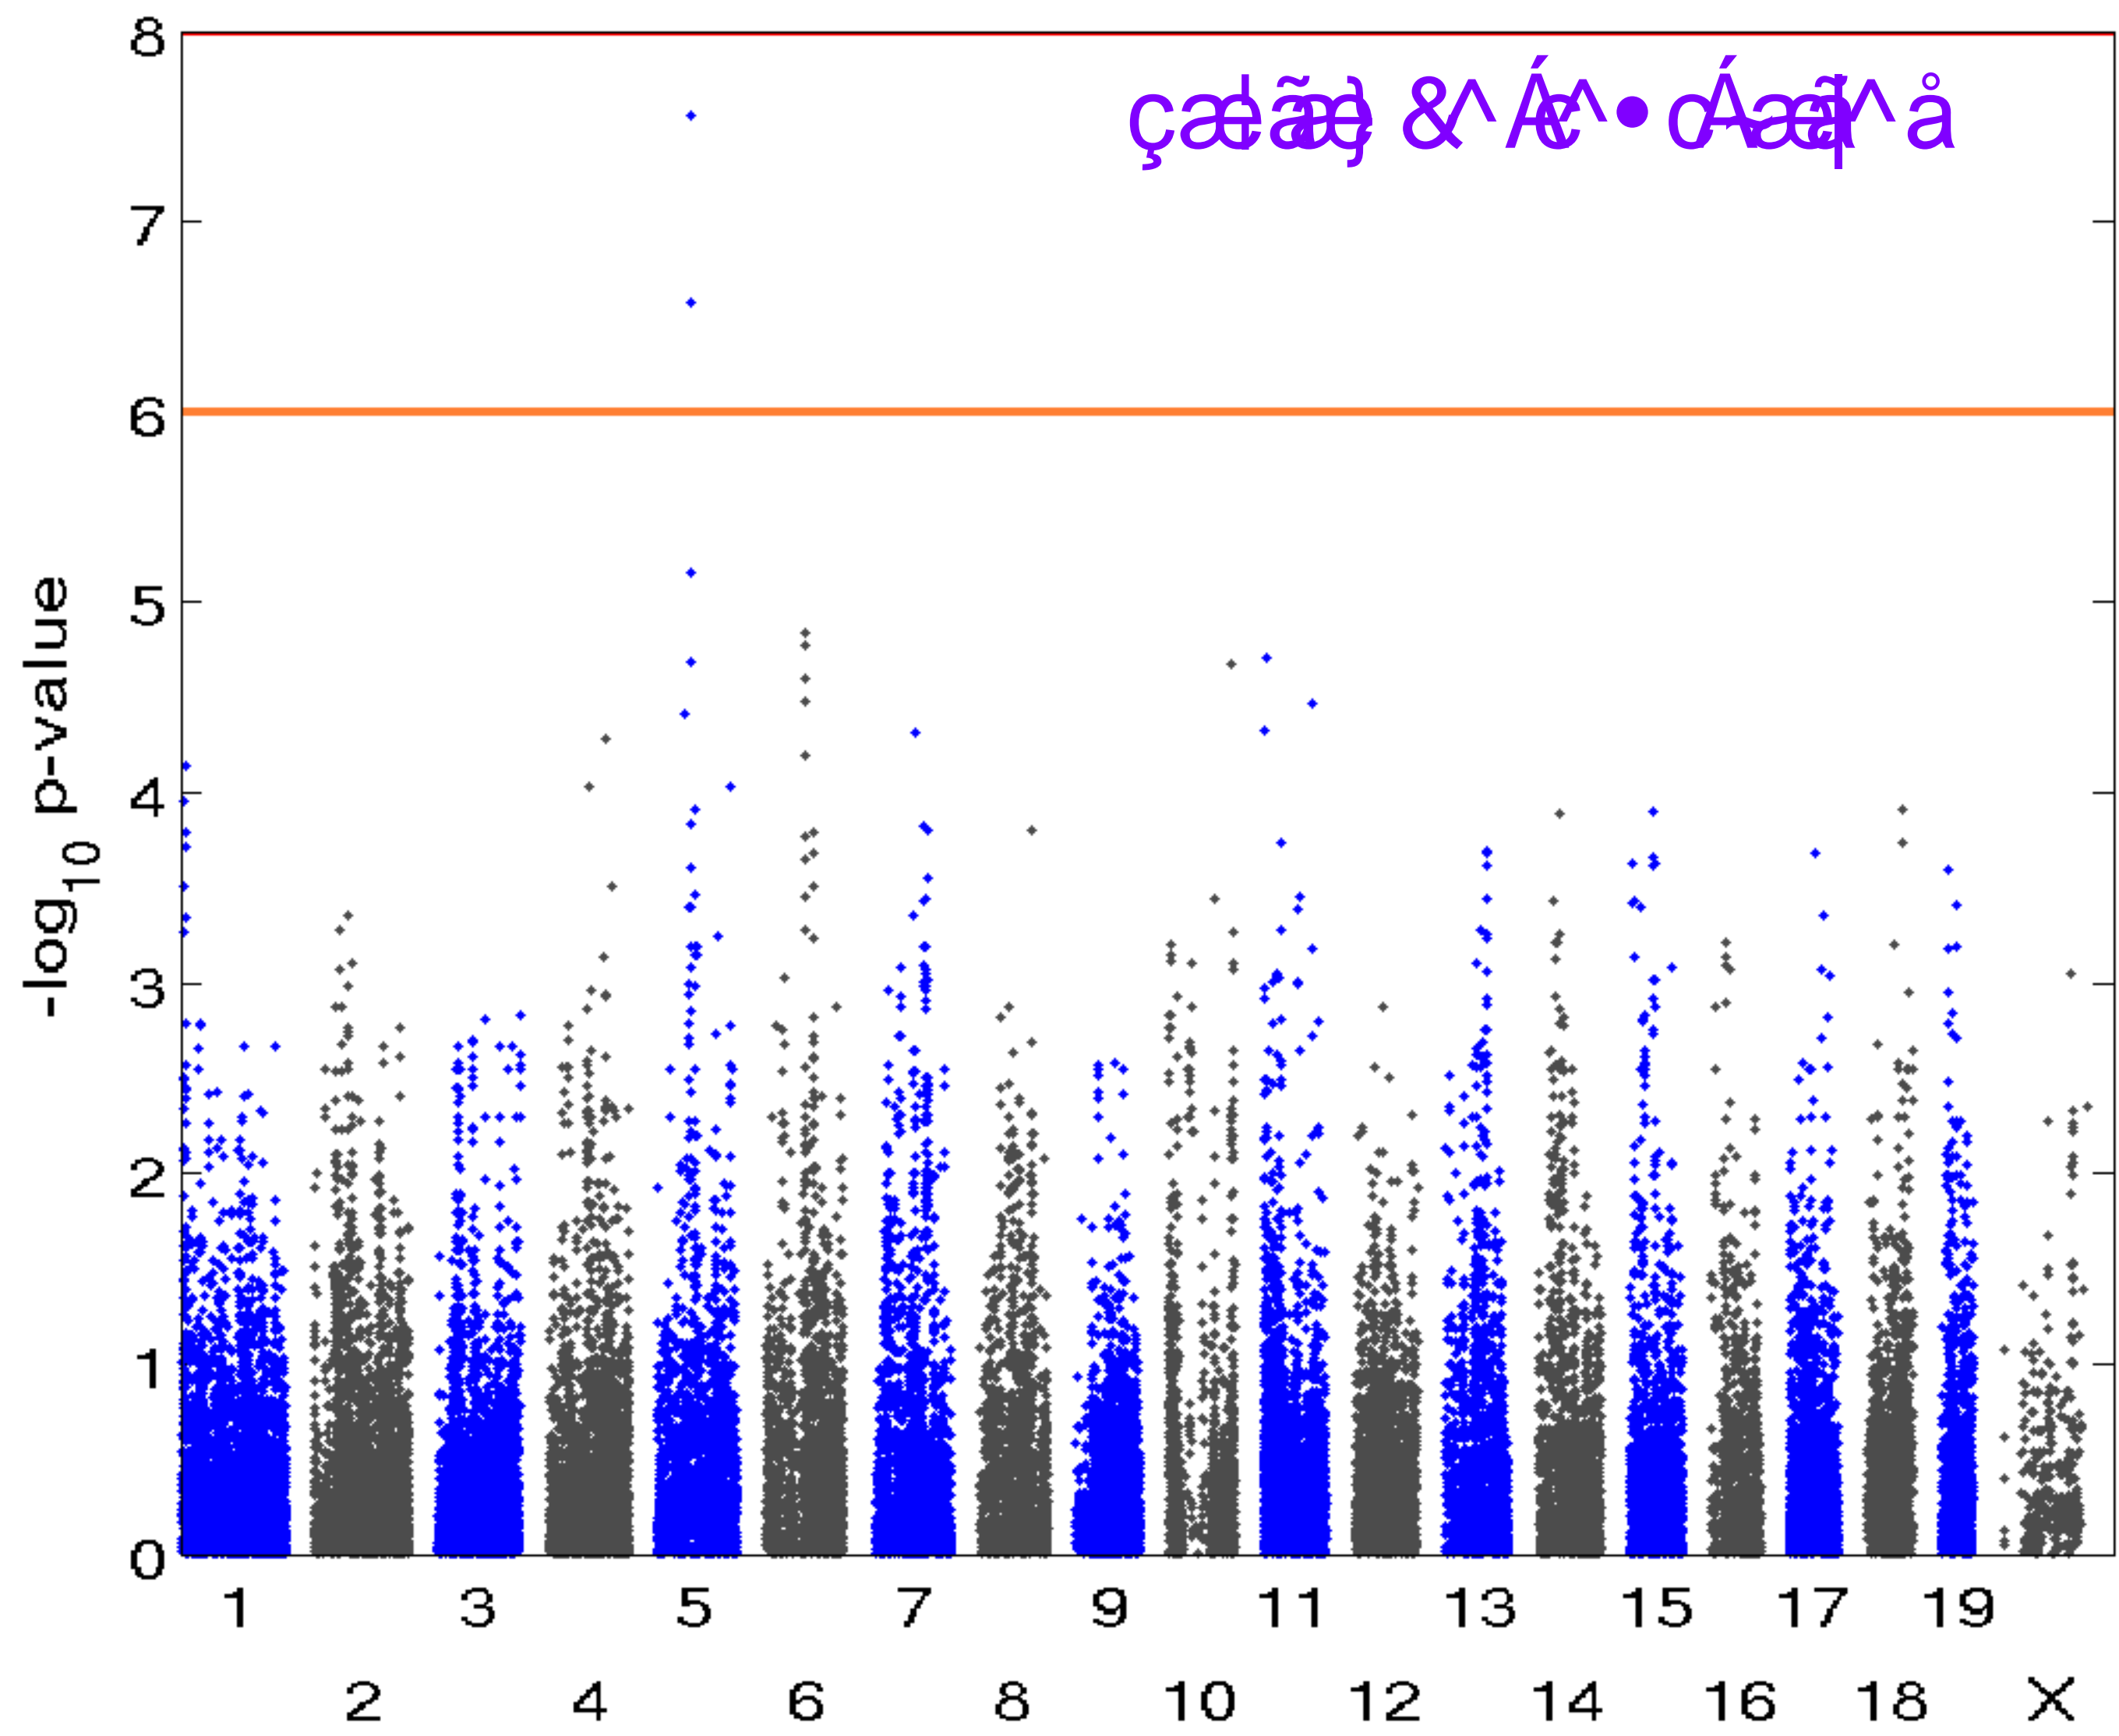

QT - iso10 vs ate

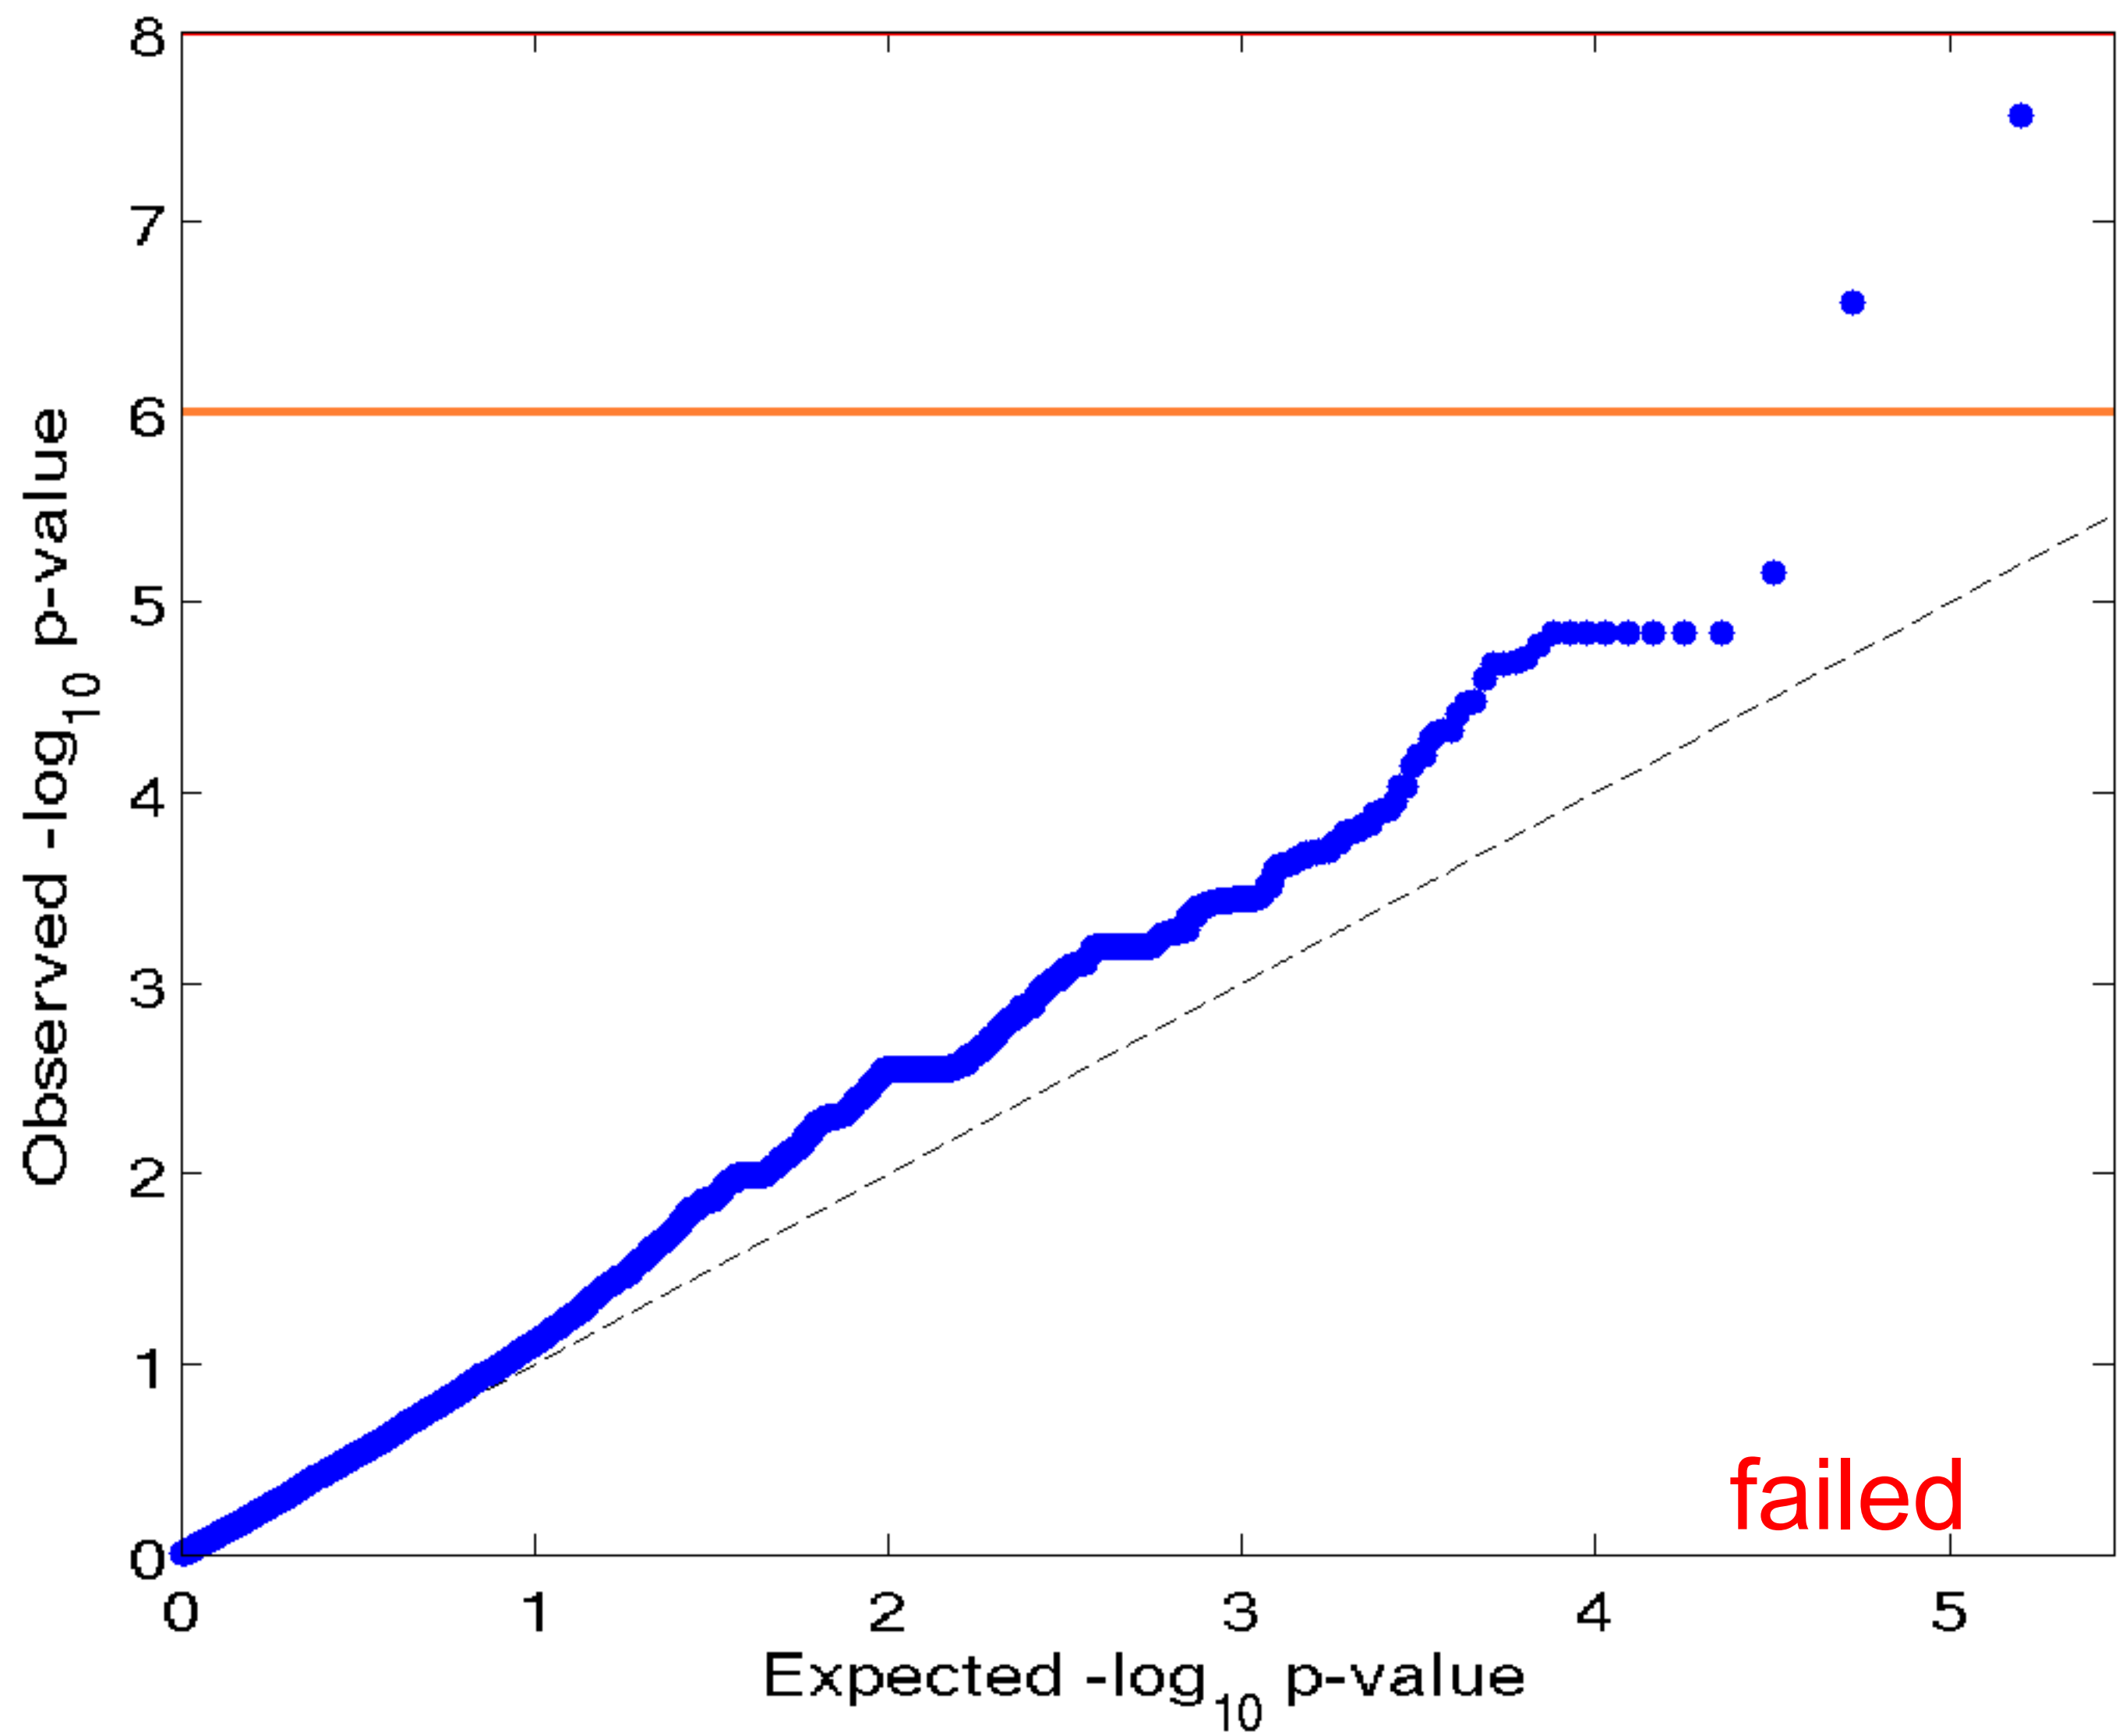



Ramp - iso10 vs ate

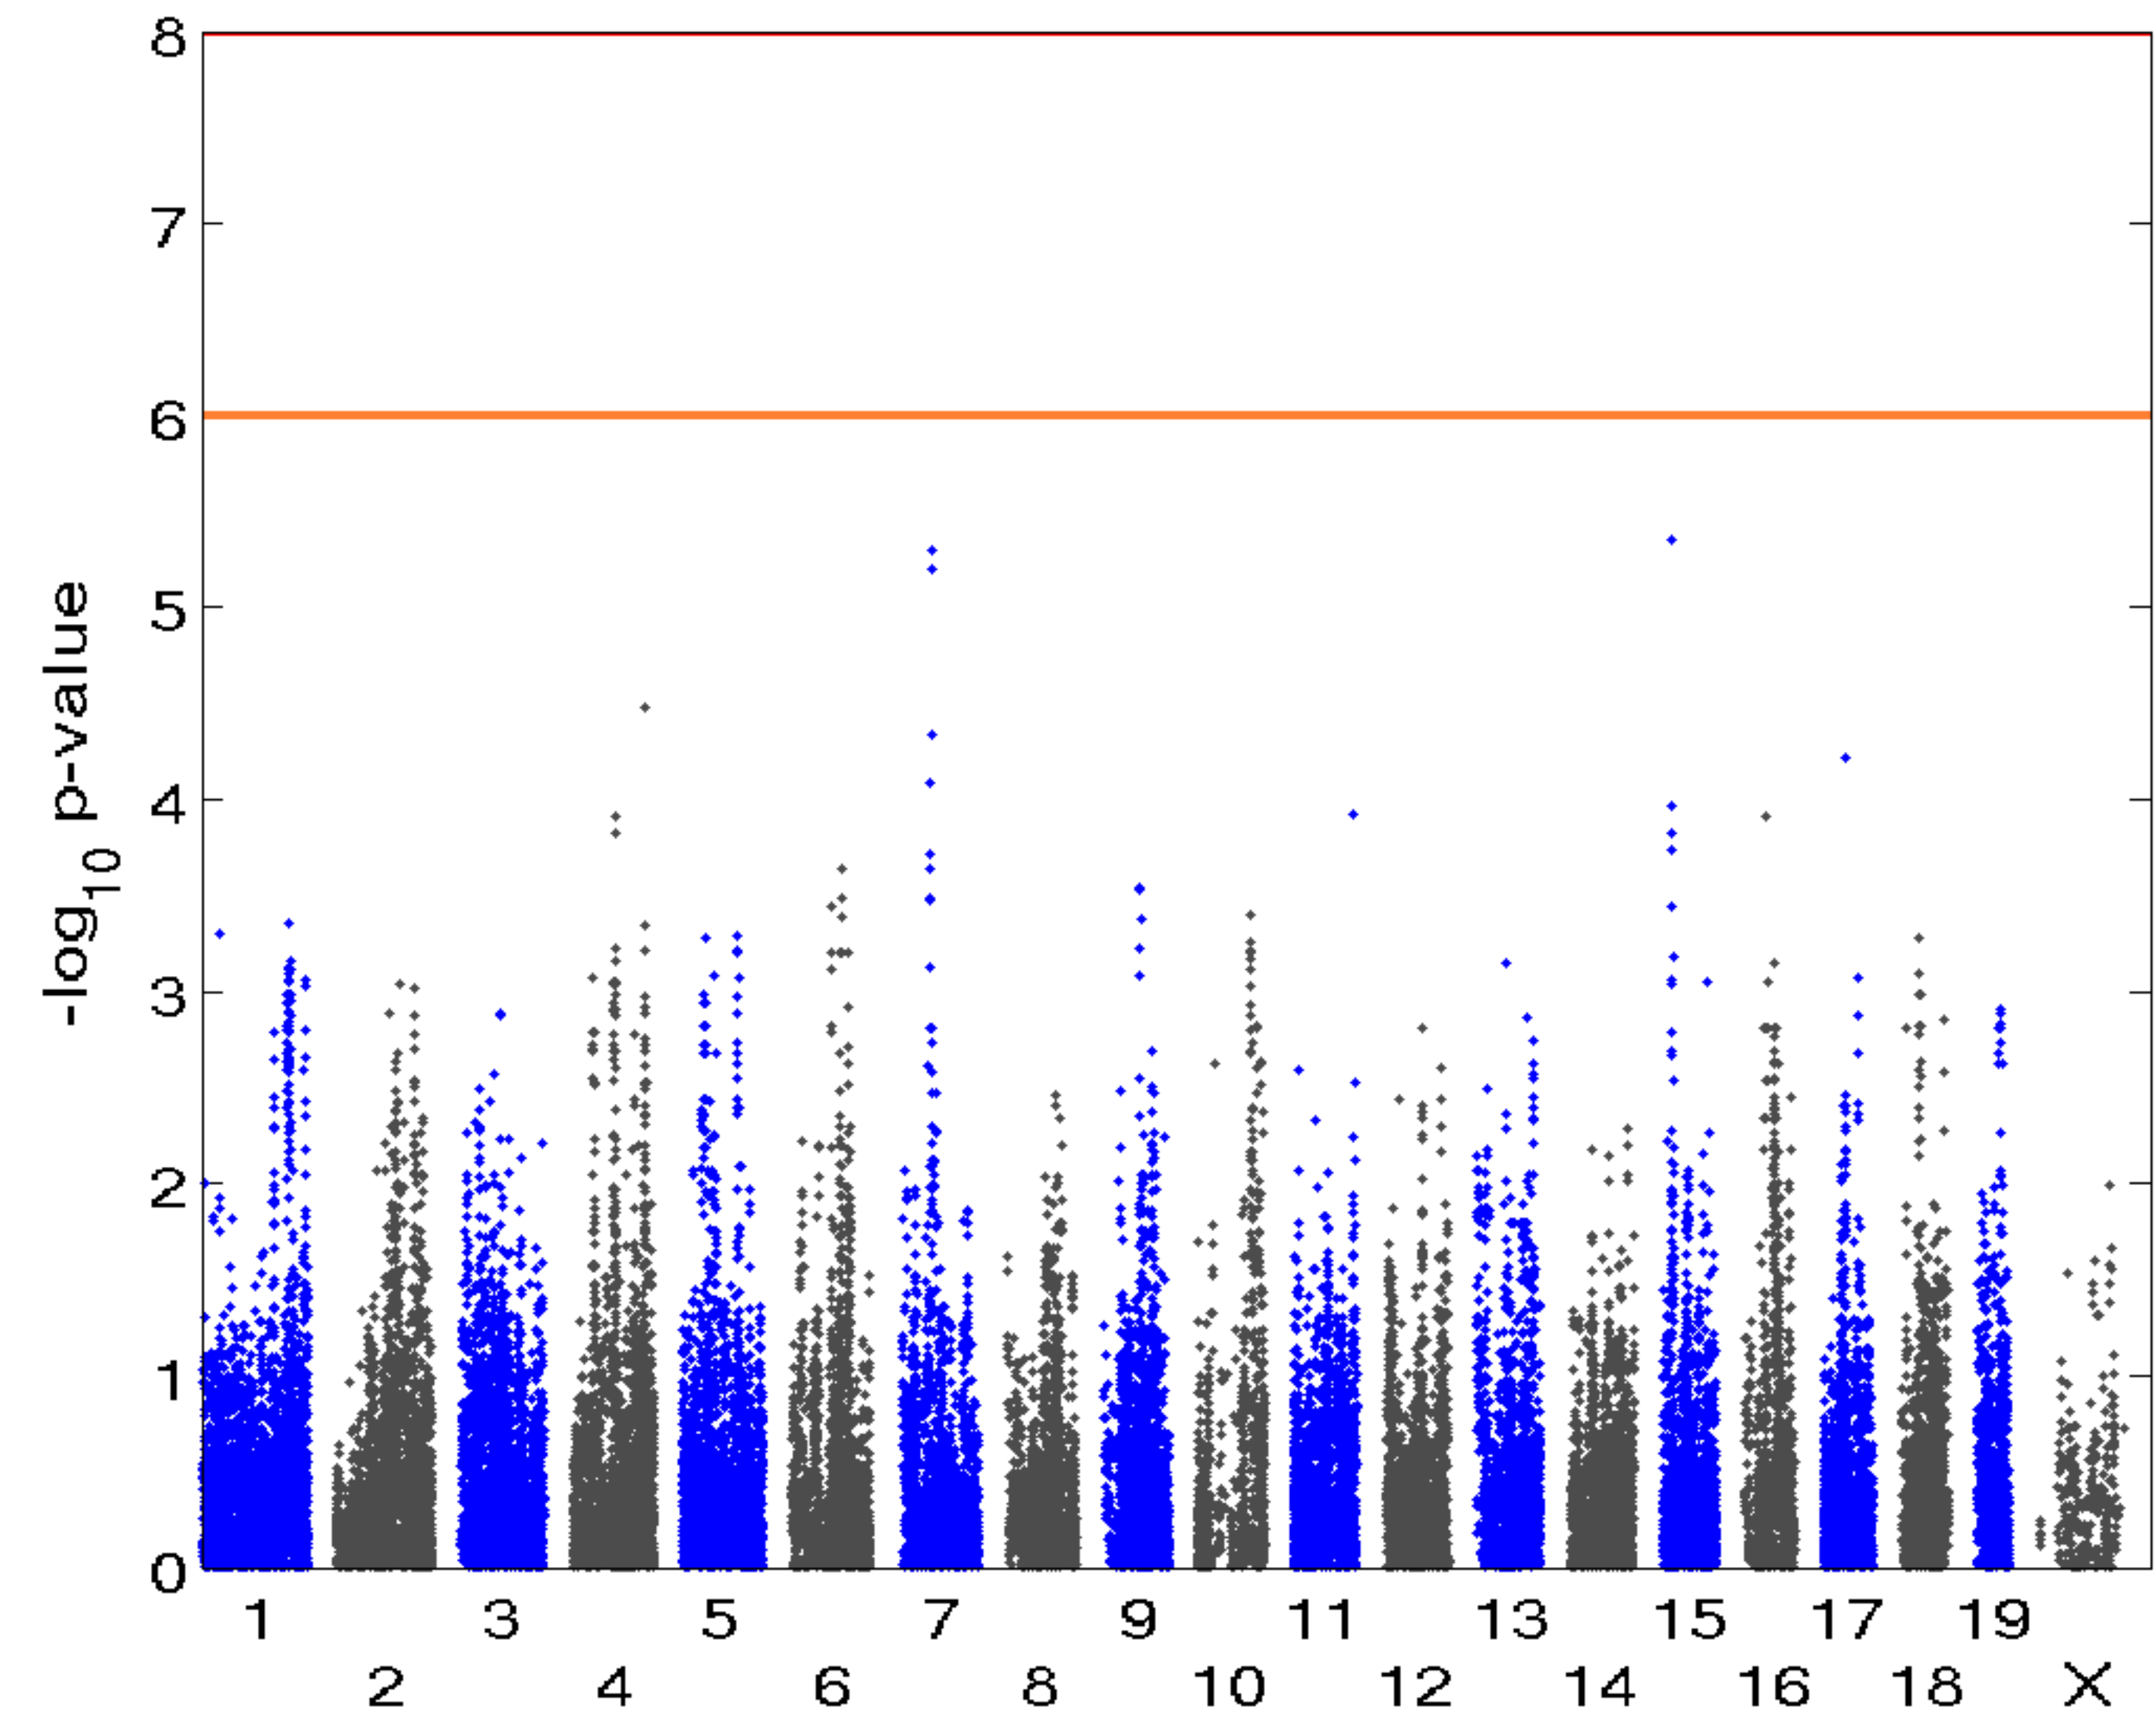

Ramp - iso10 vs ate

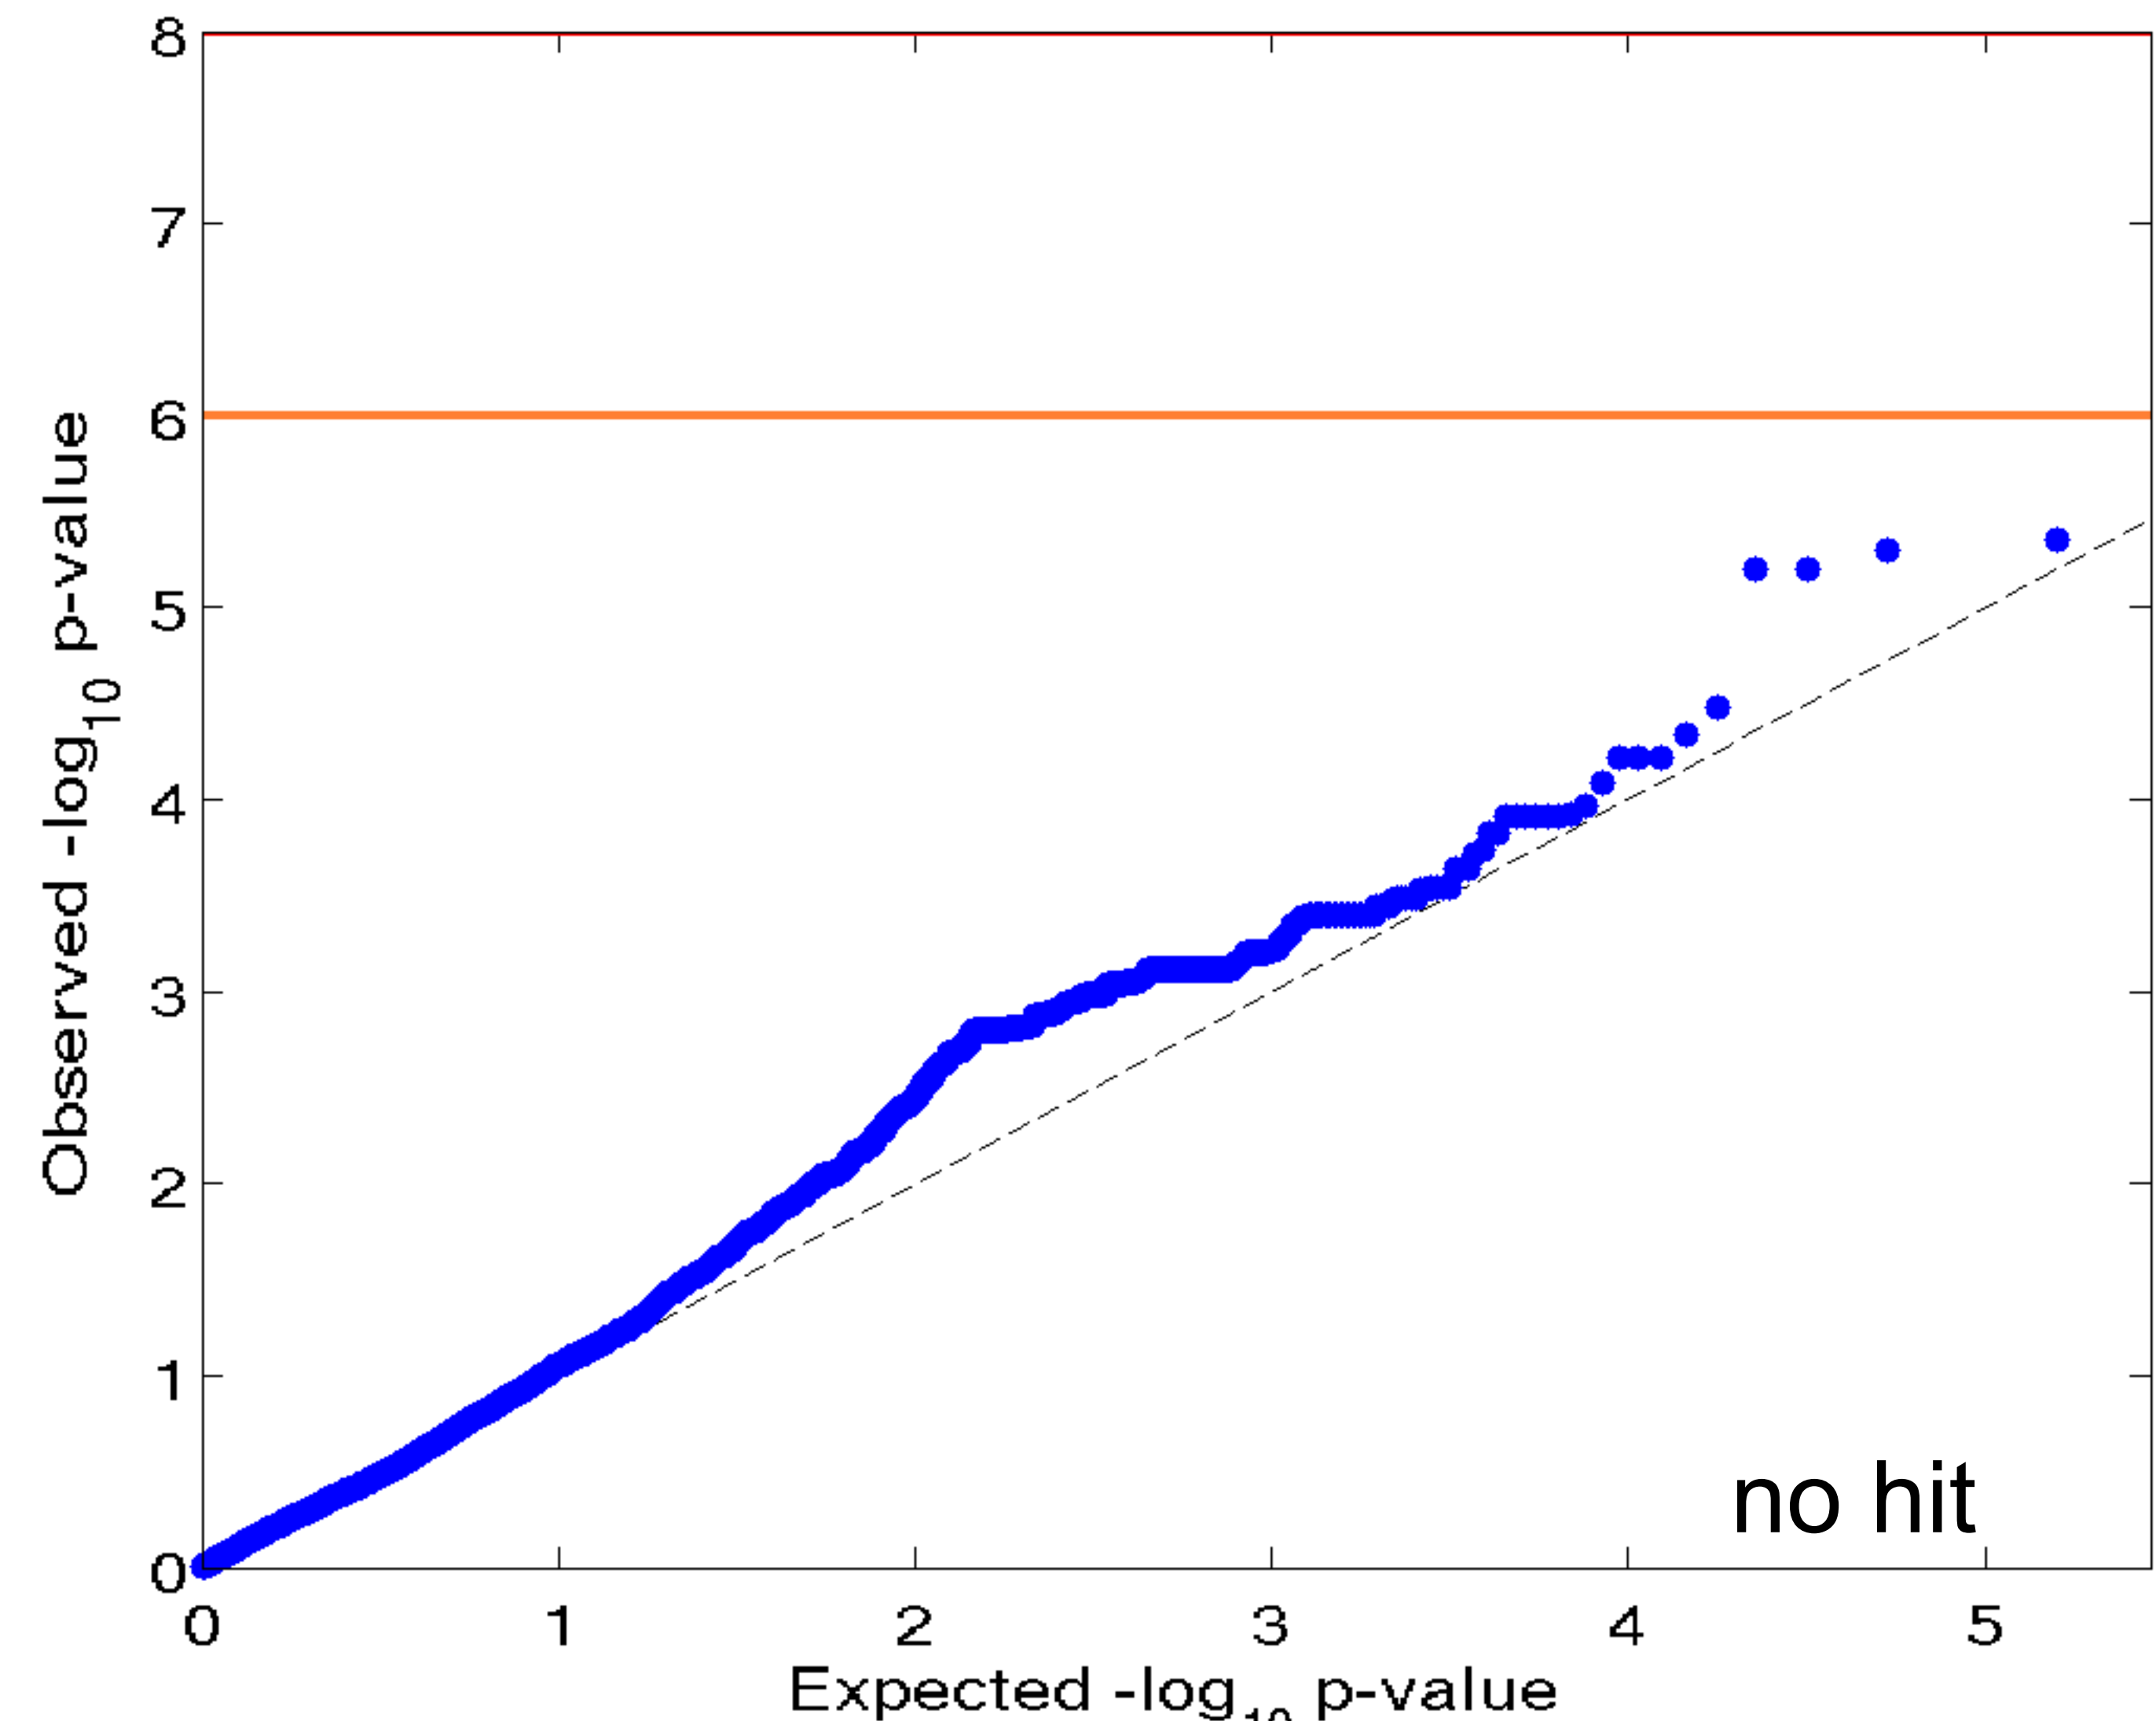

RR - iso10 vs ate

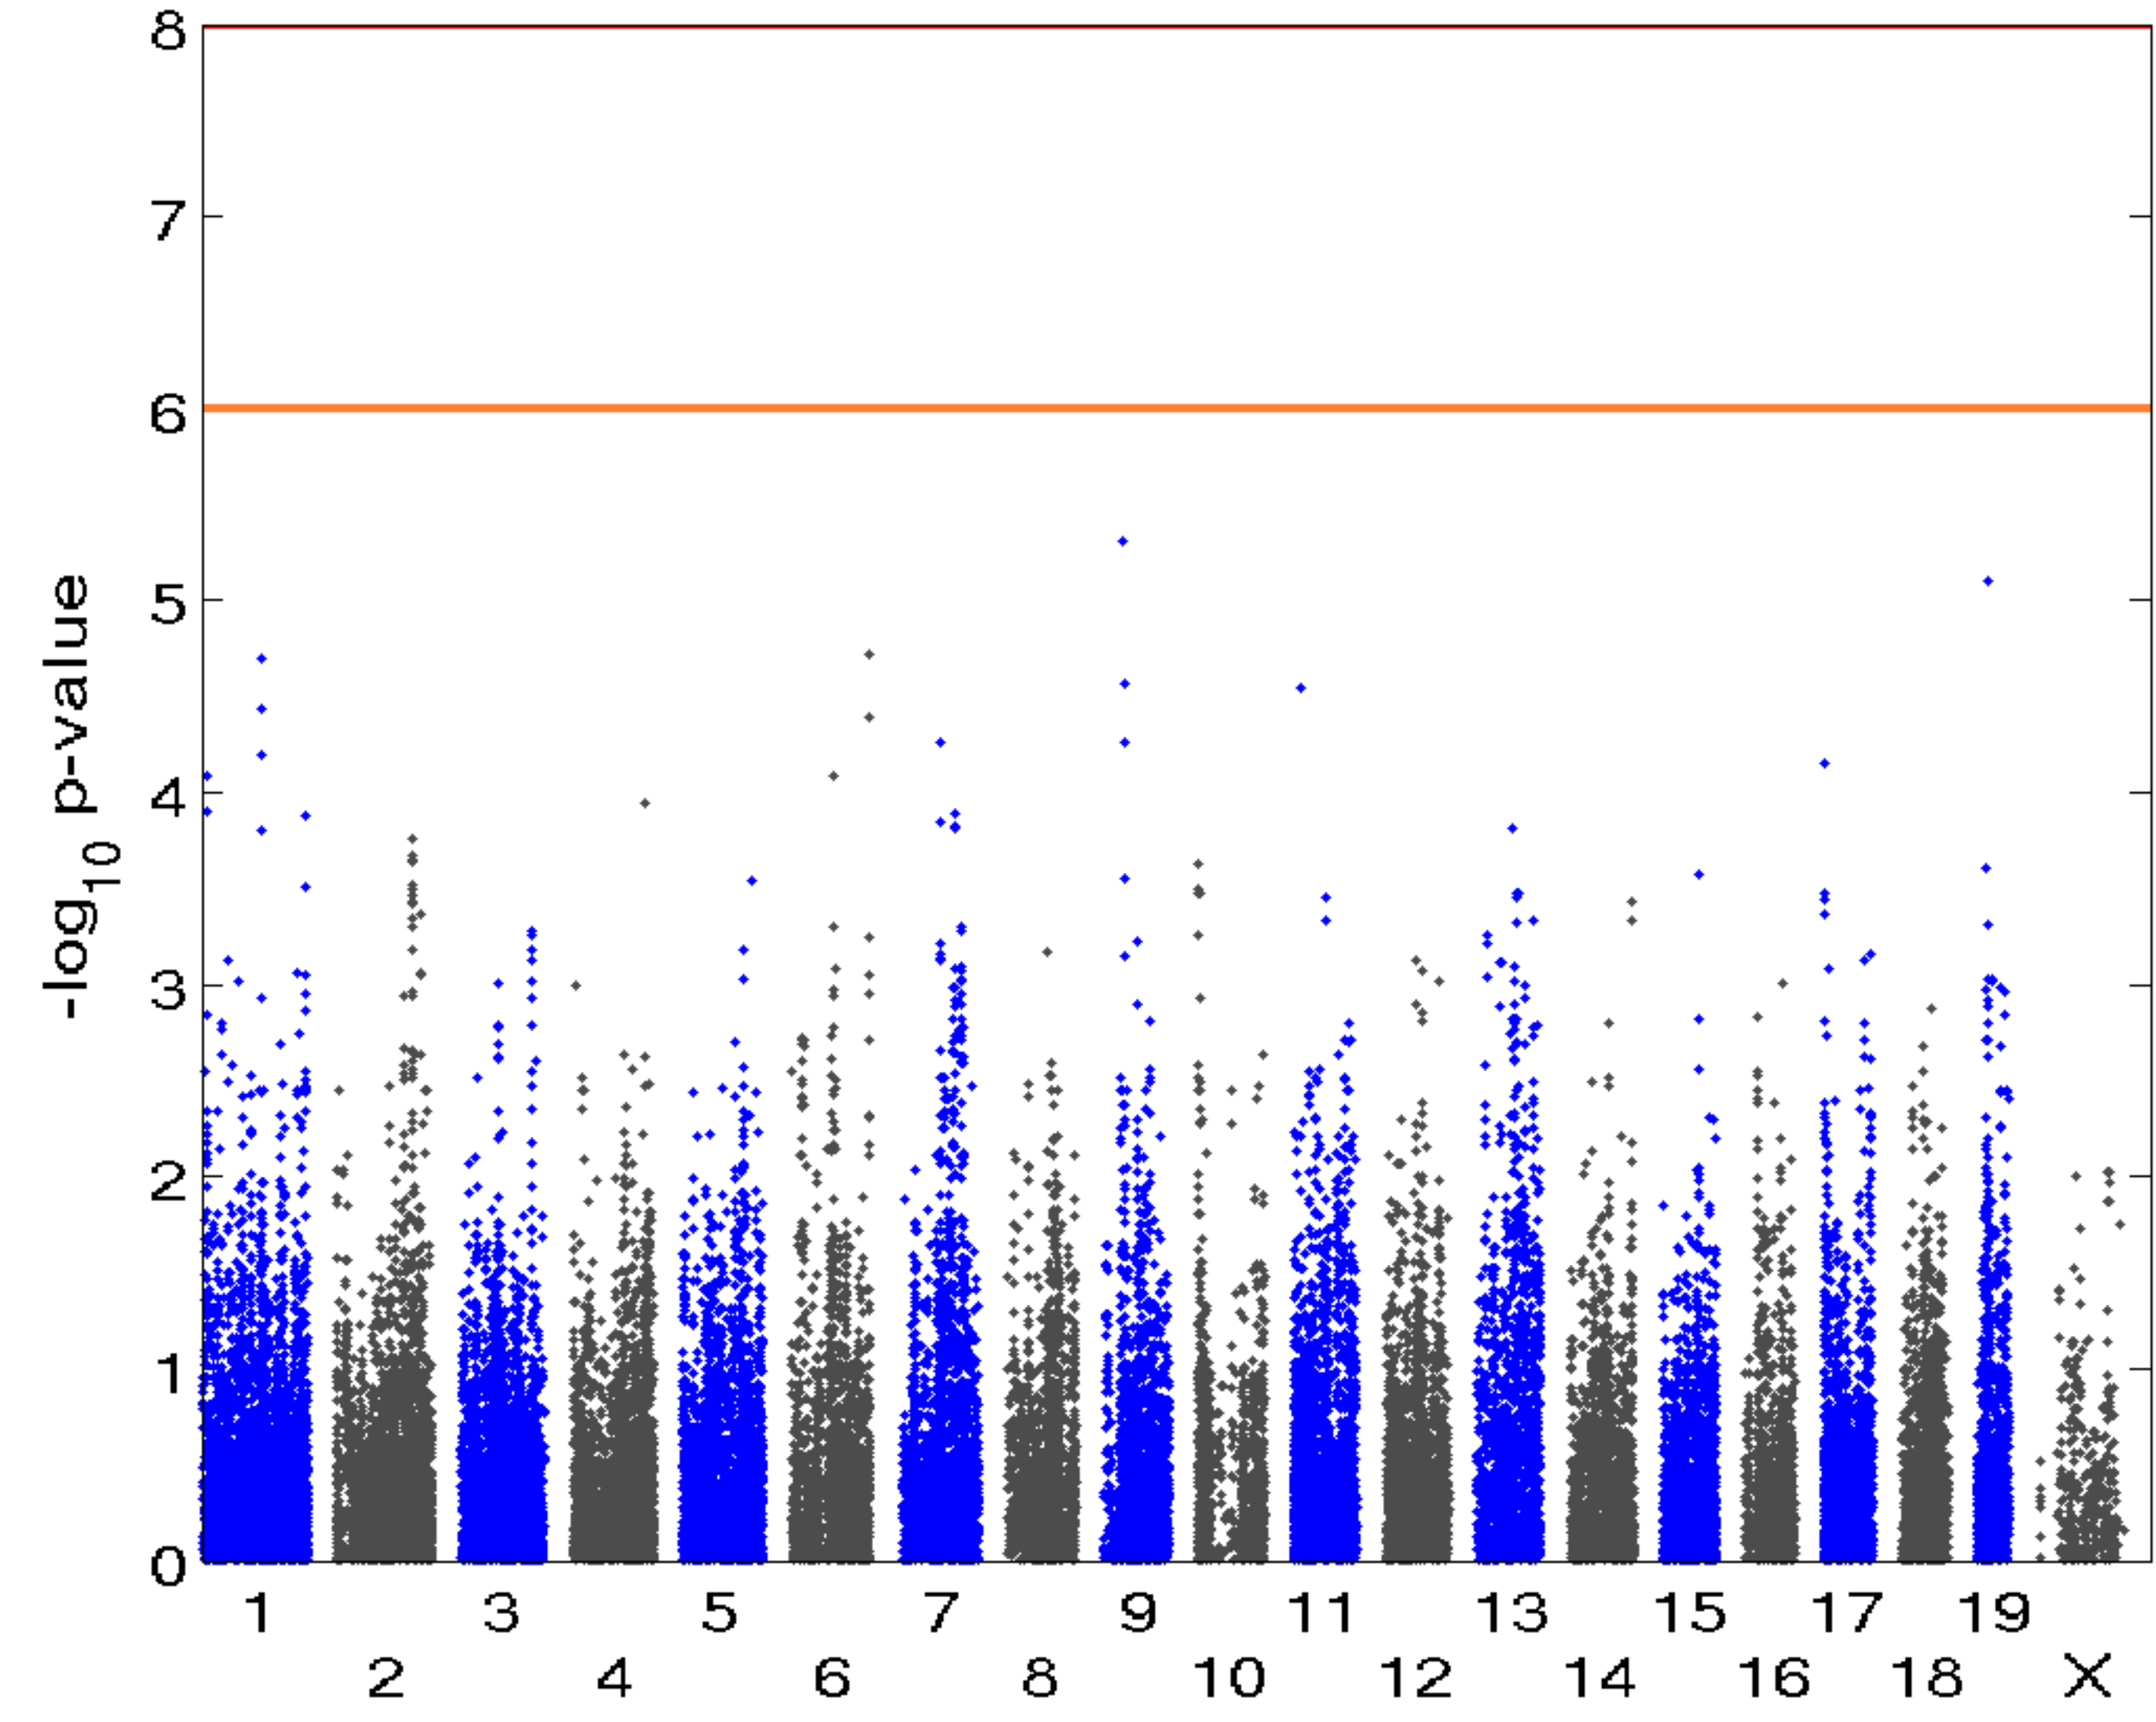

RR - iso10 vs ate

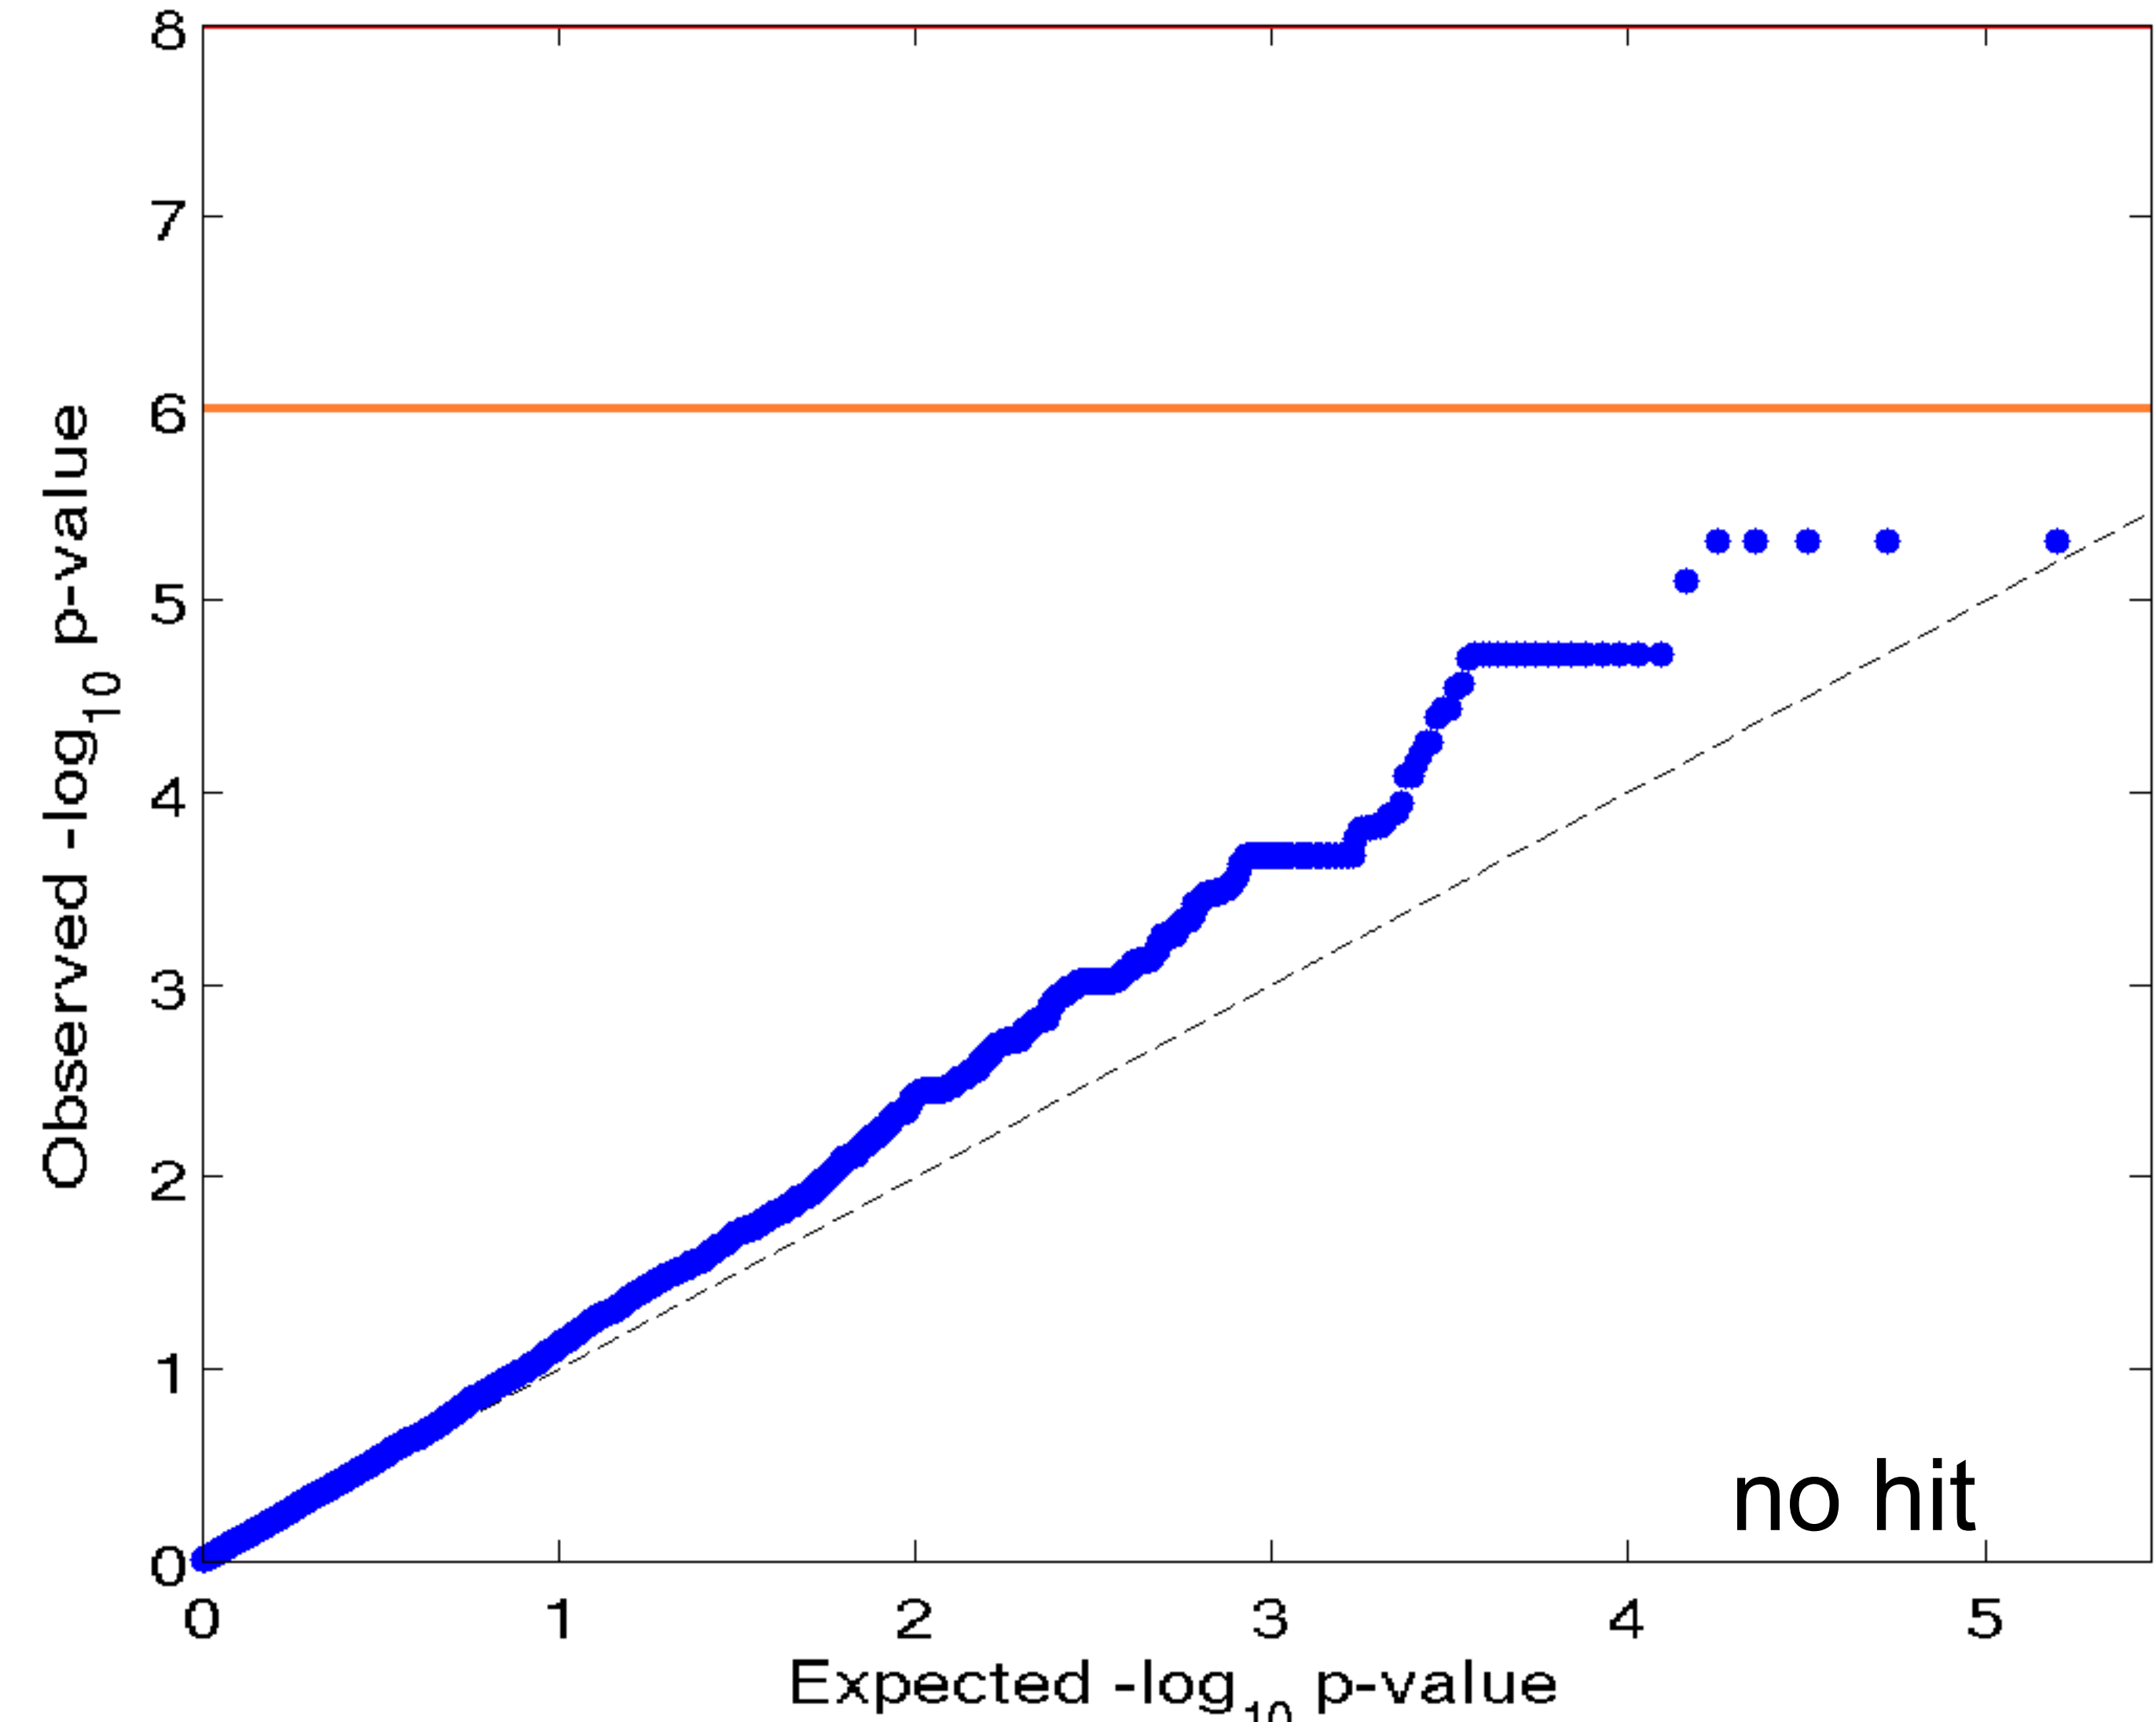

Samp - iso10 vs ate

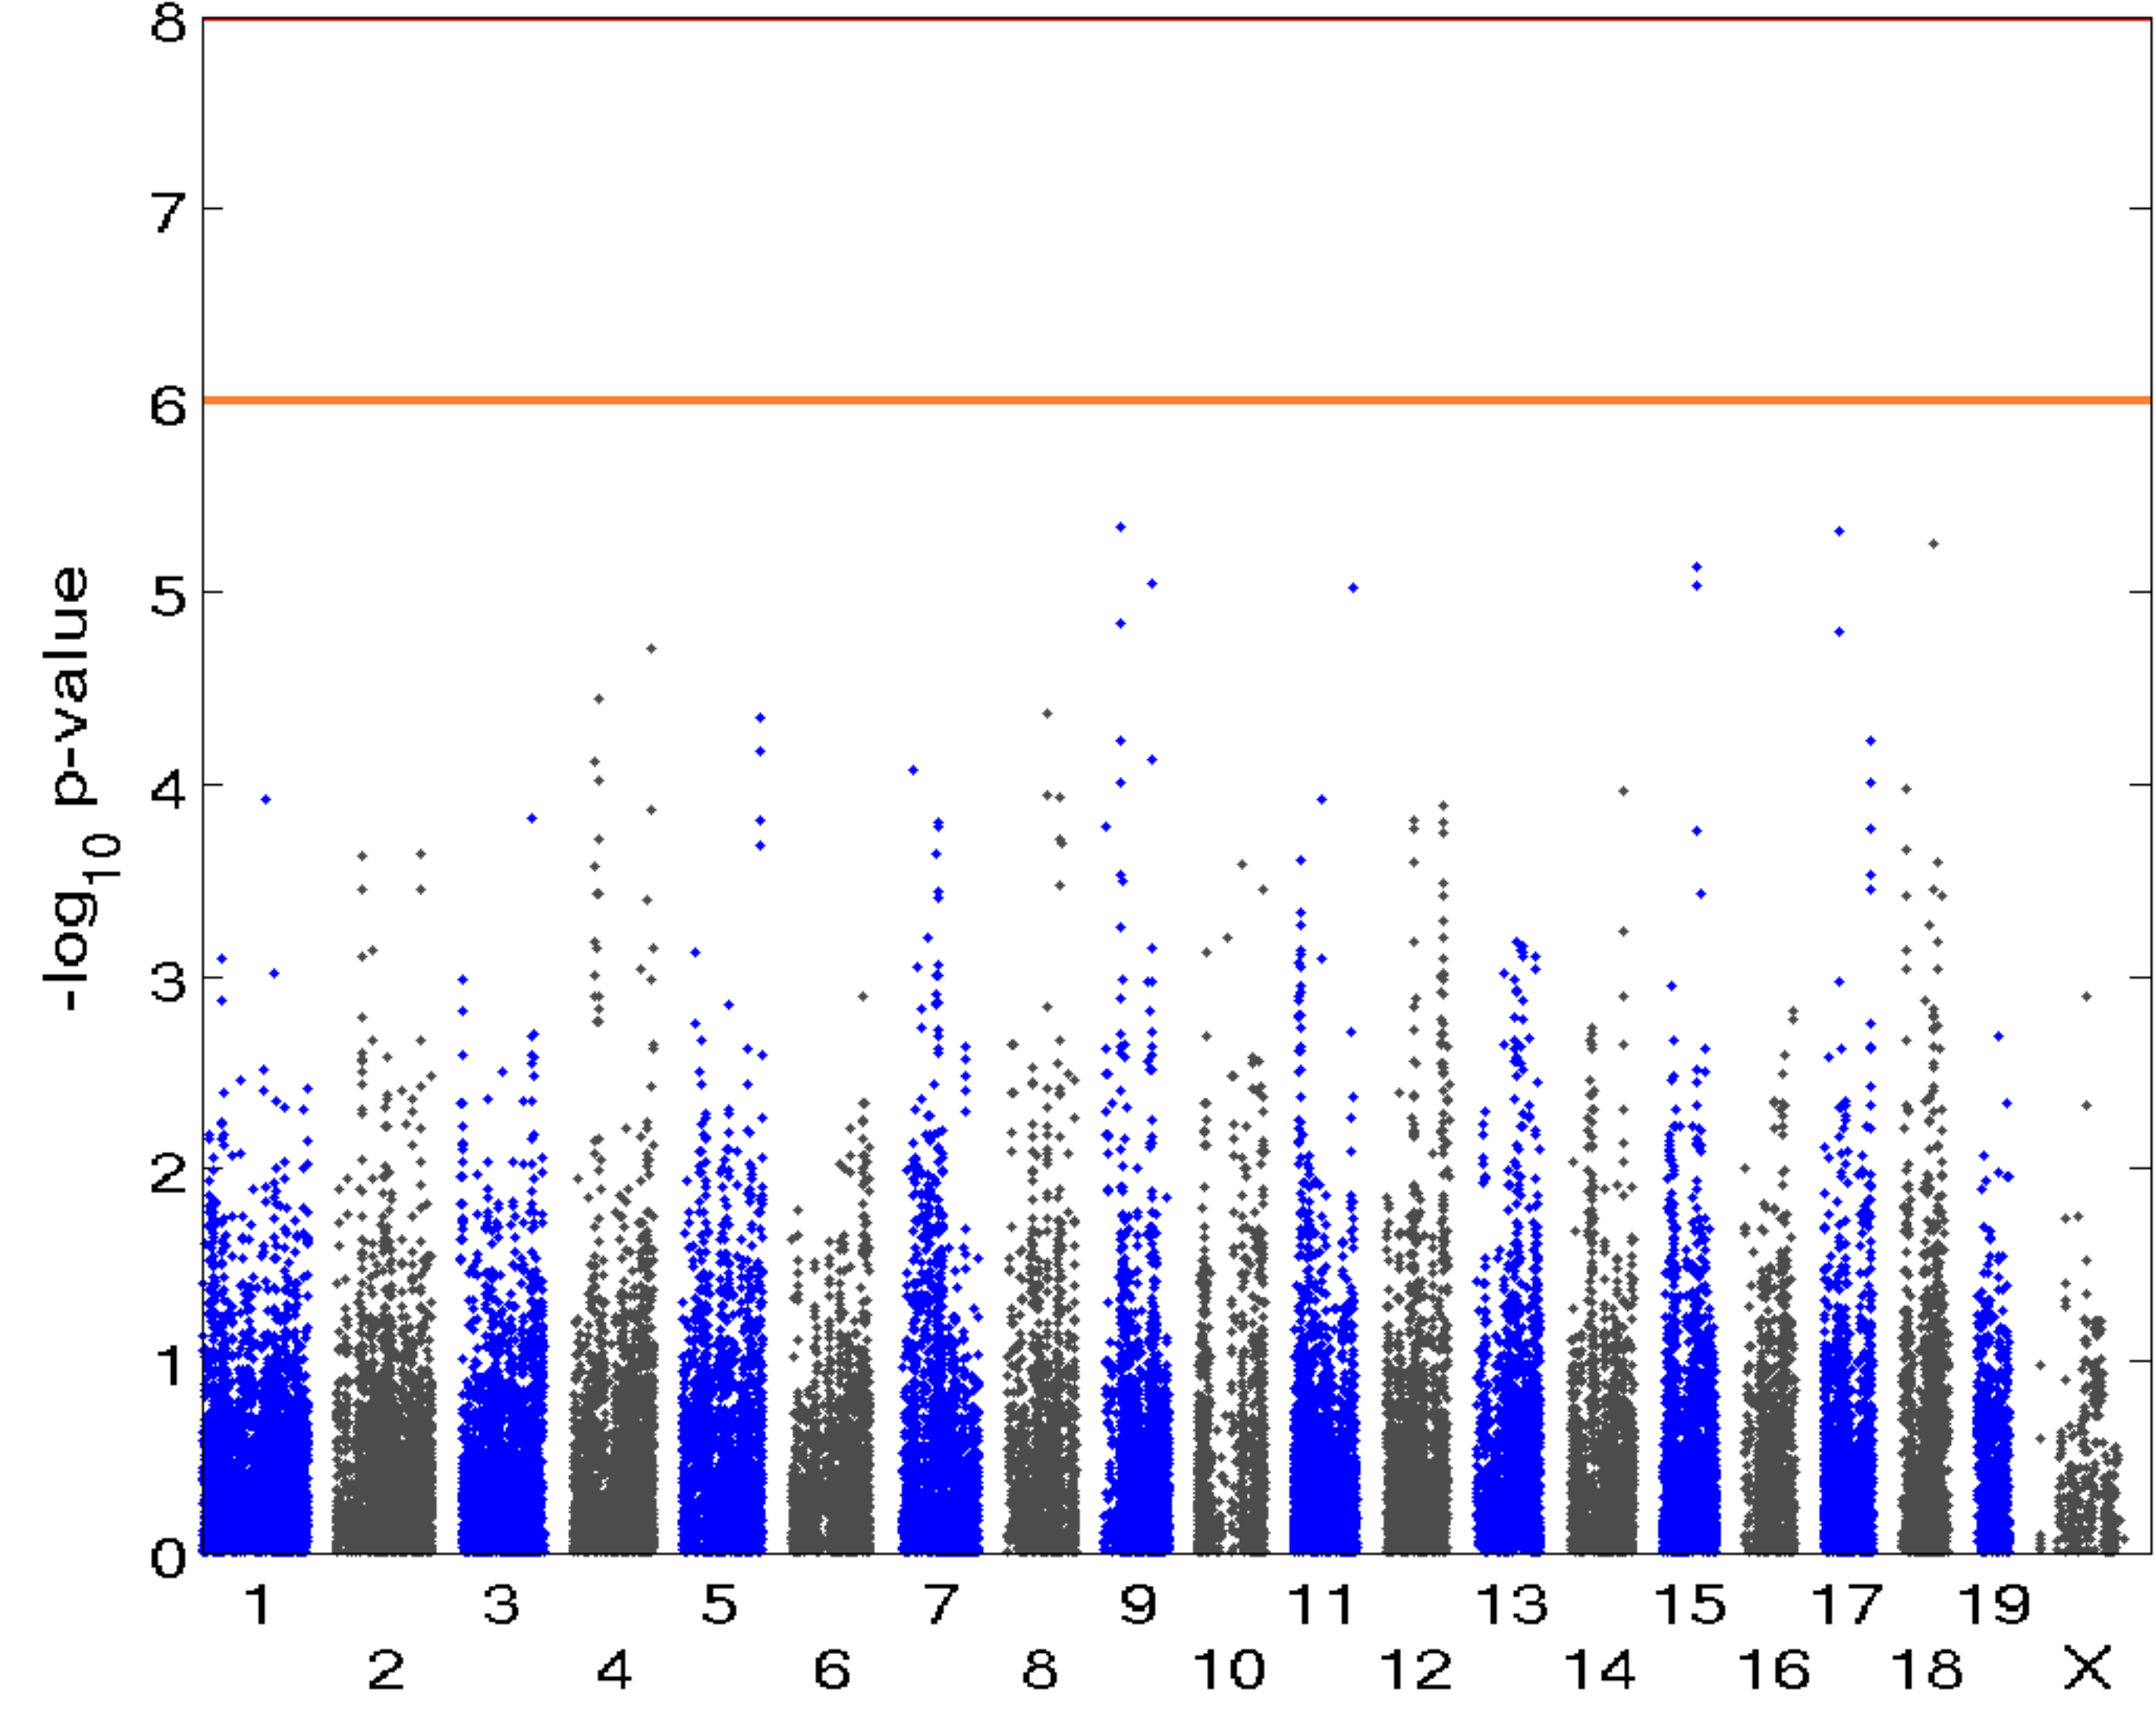

Samp - iso10 vs ate

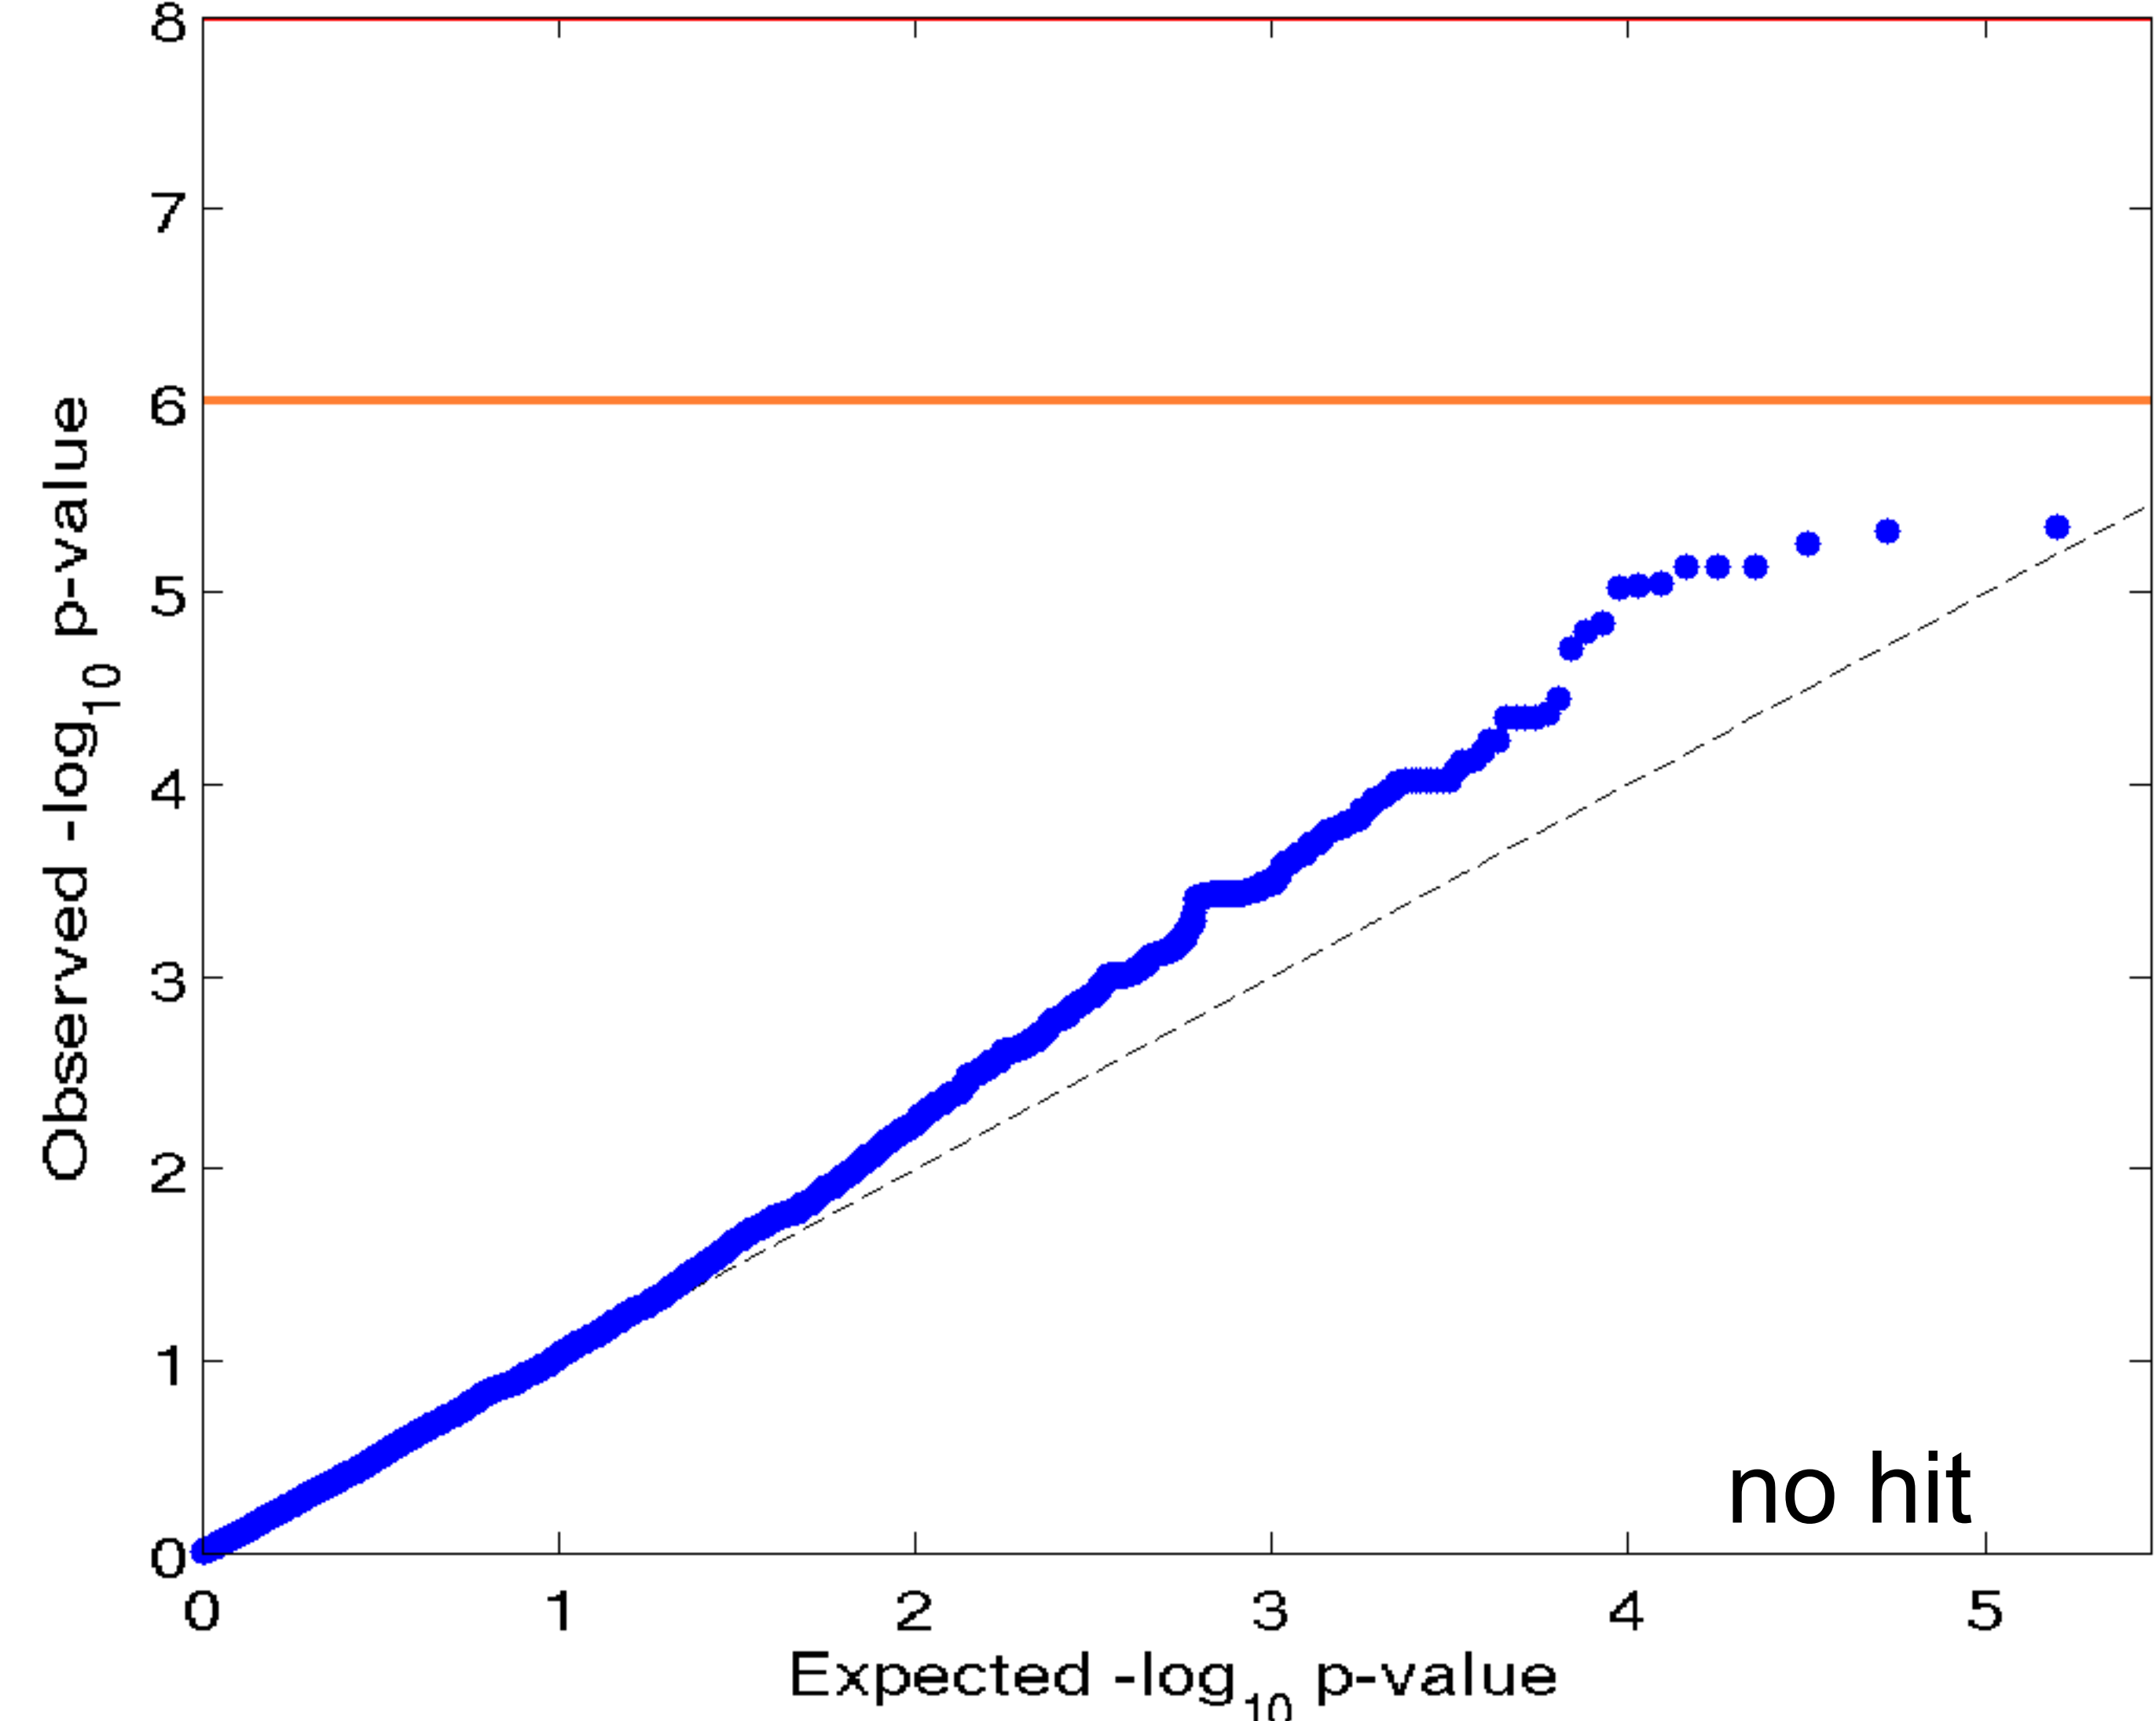

SBP - iso10 vs ate

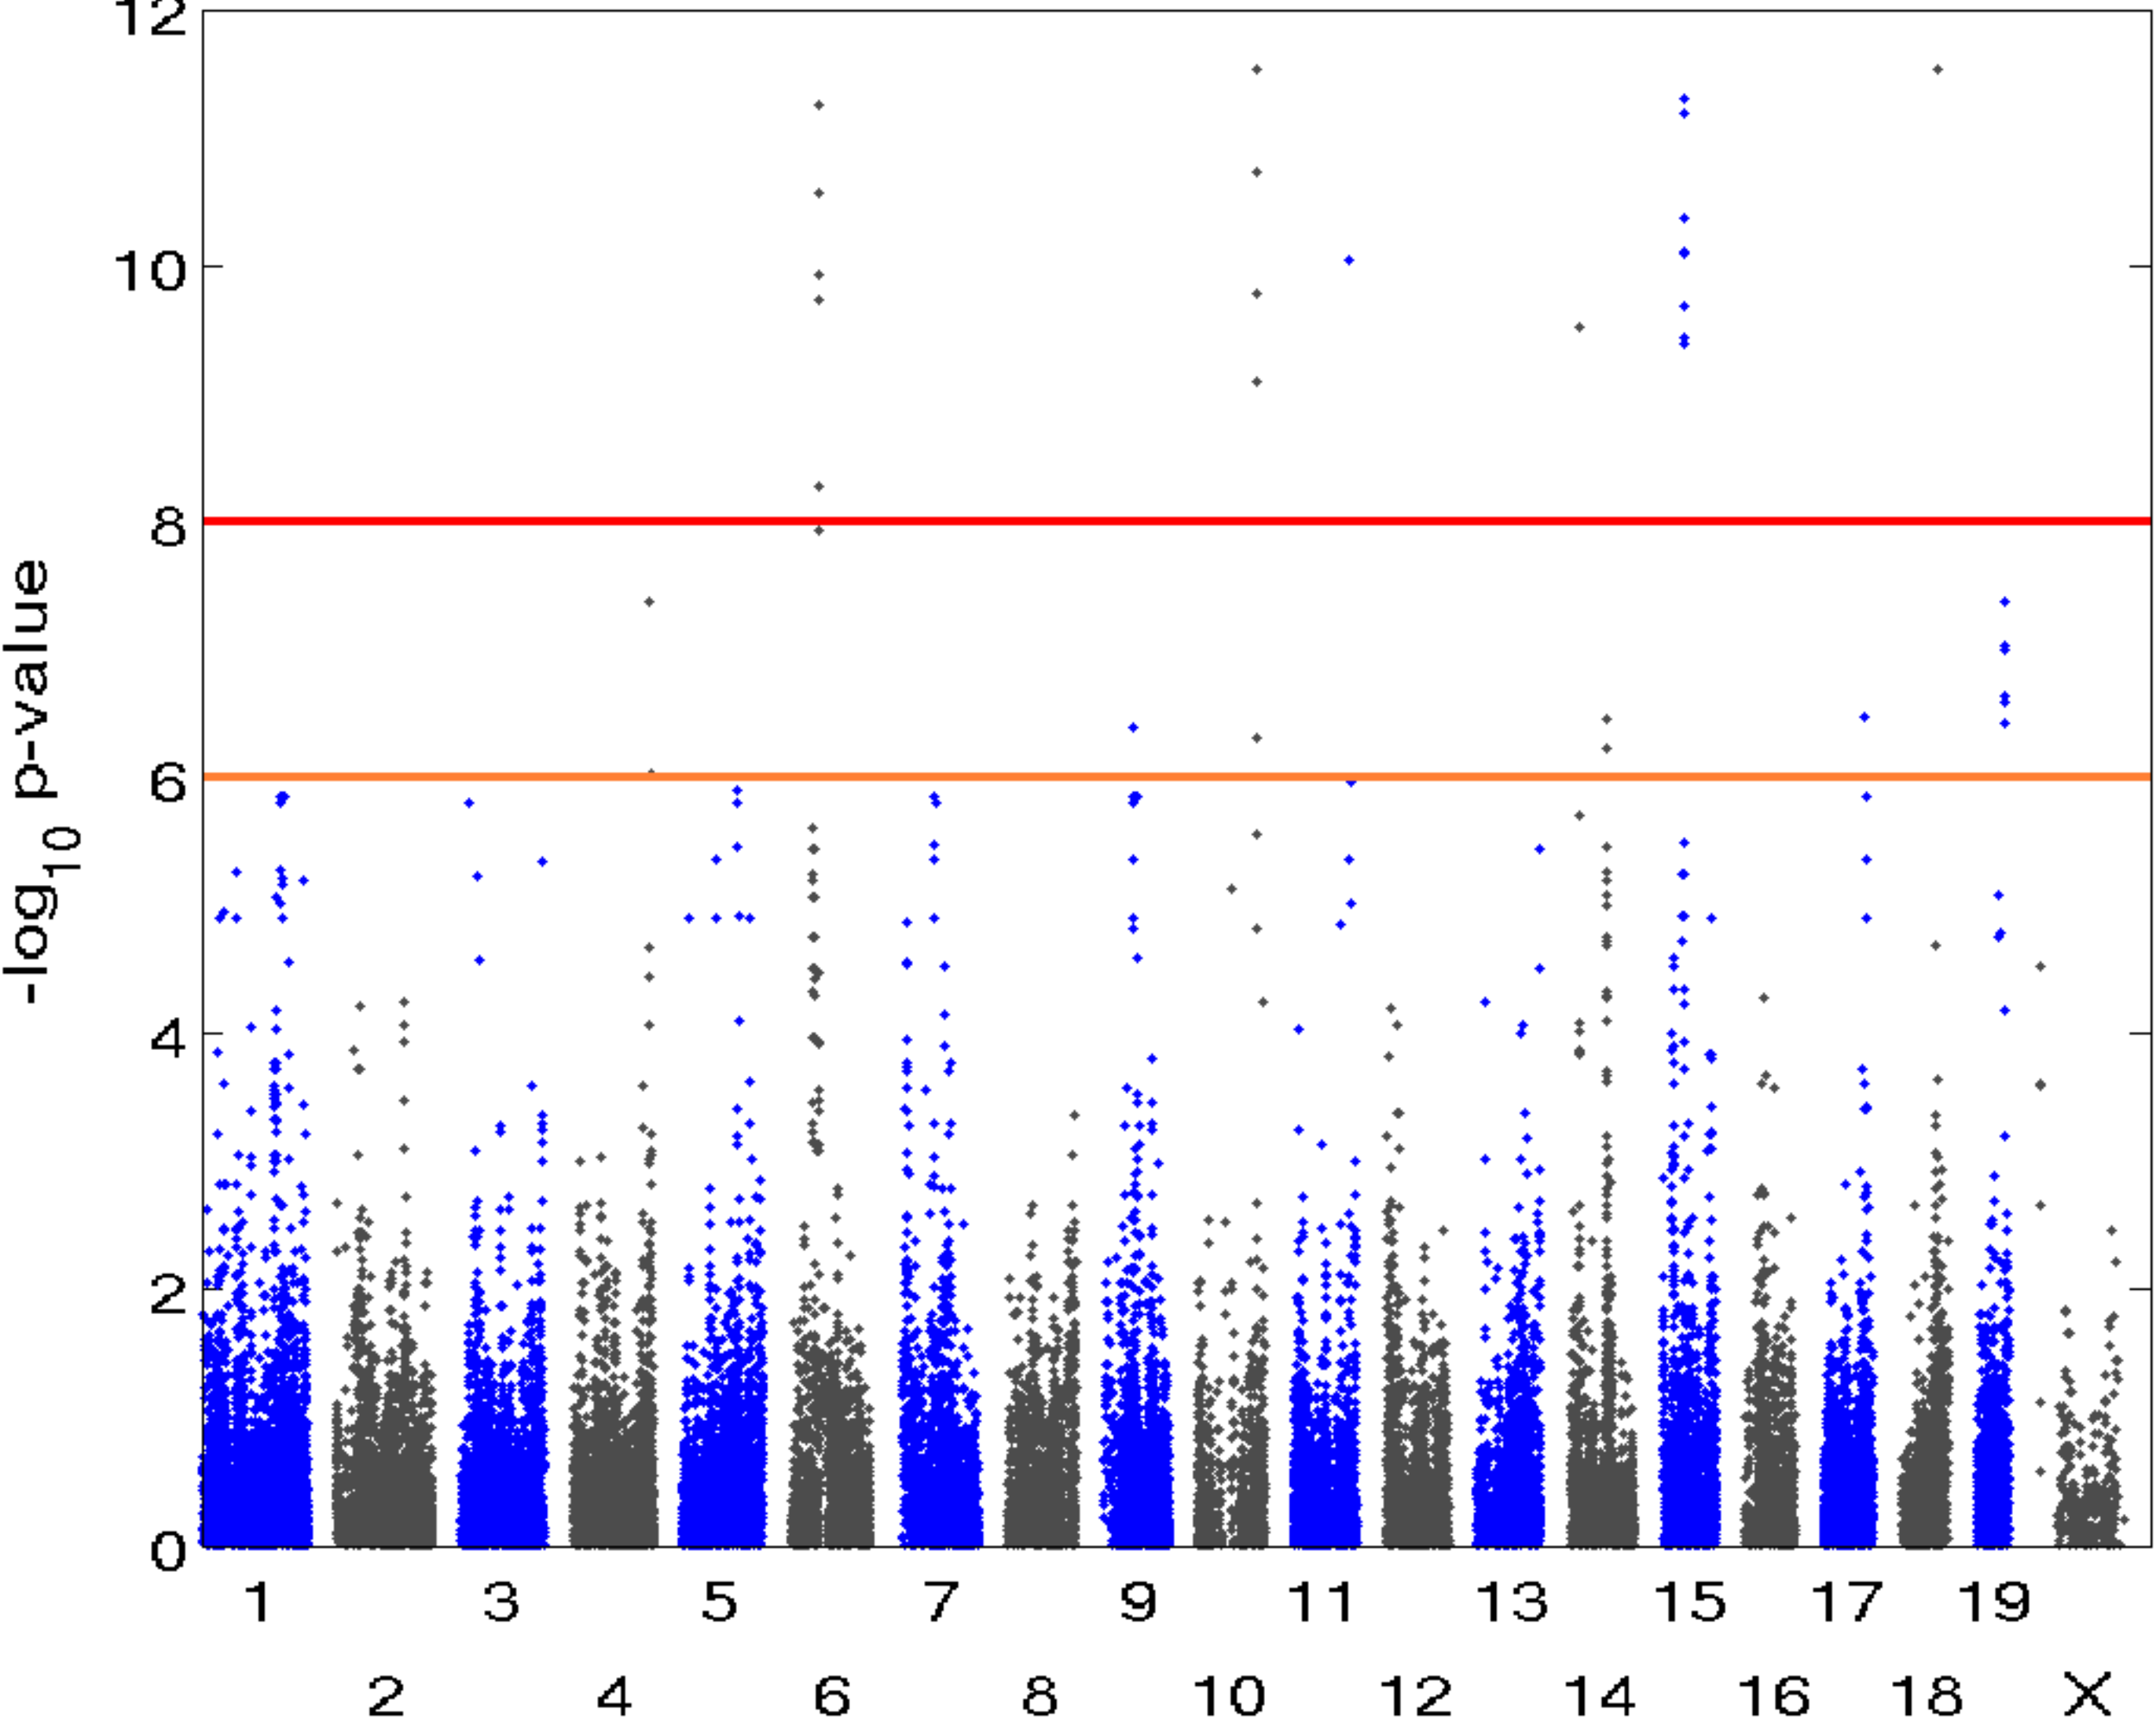

SBP - iso10 vs ate

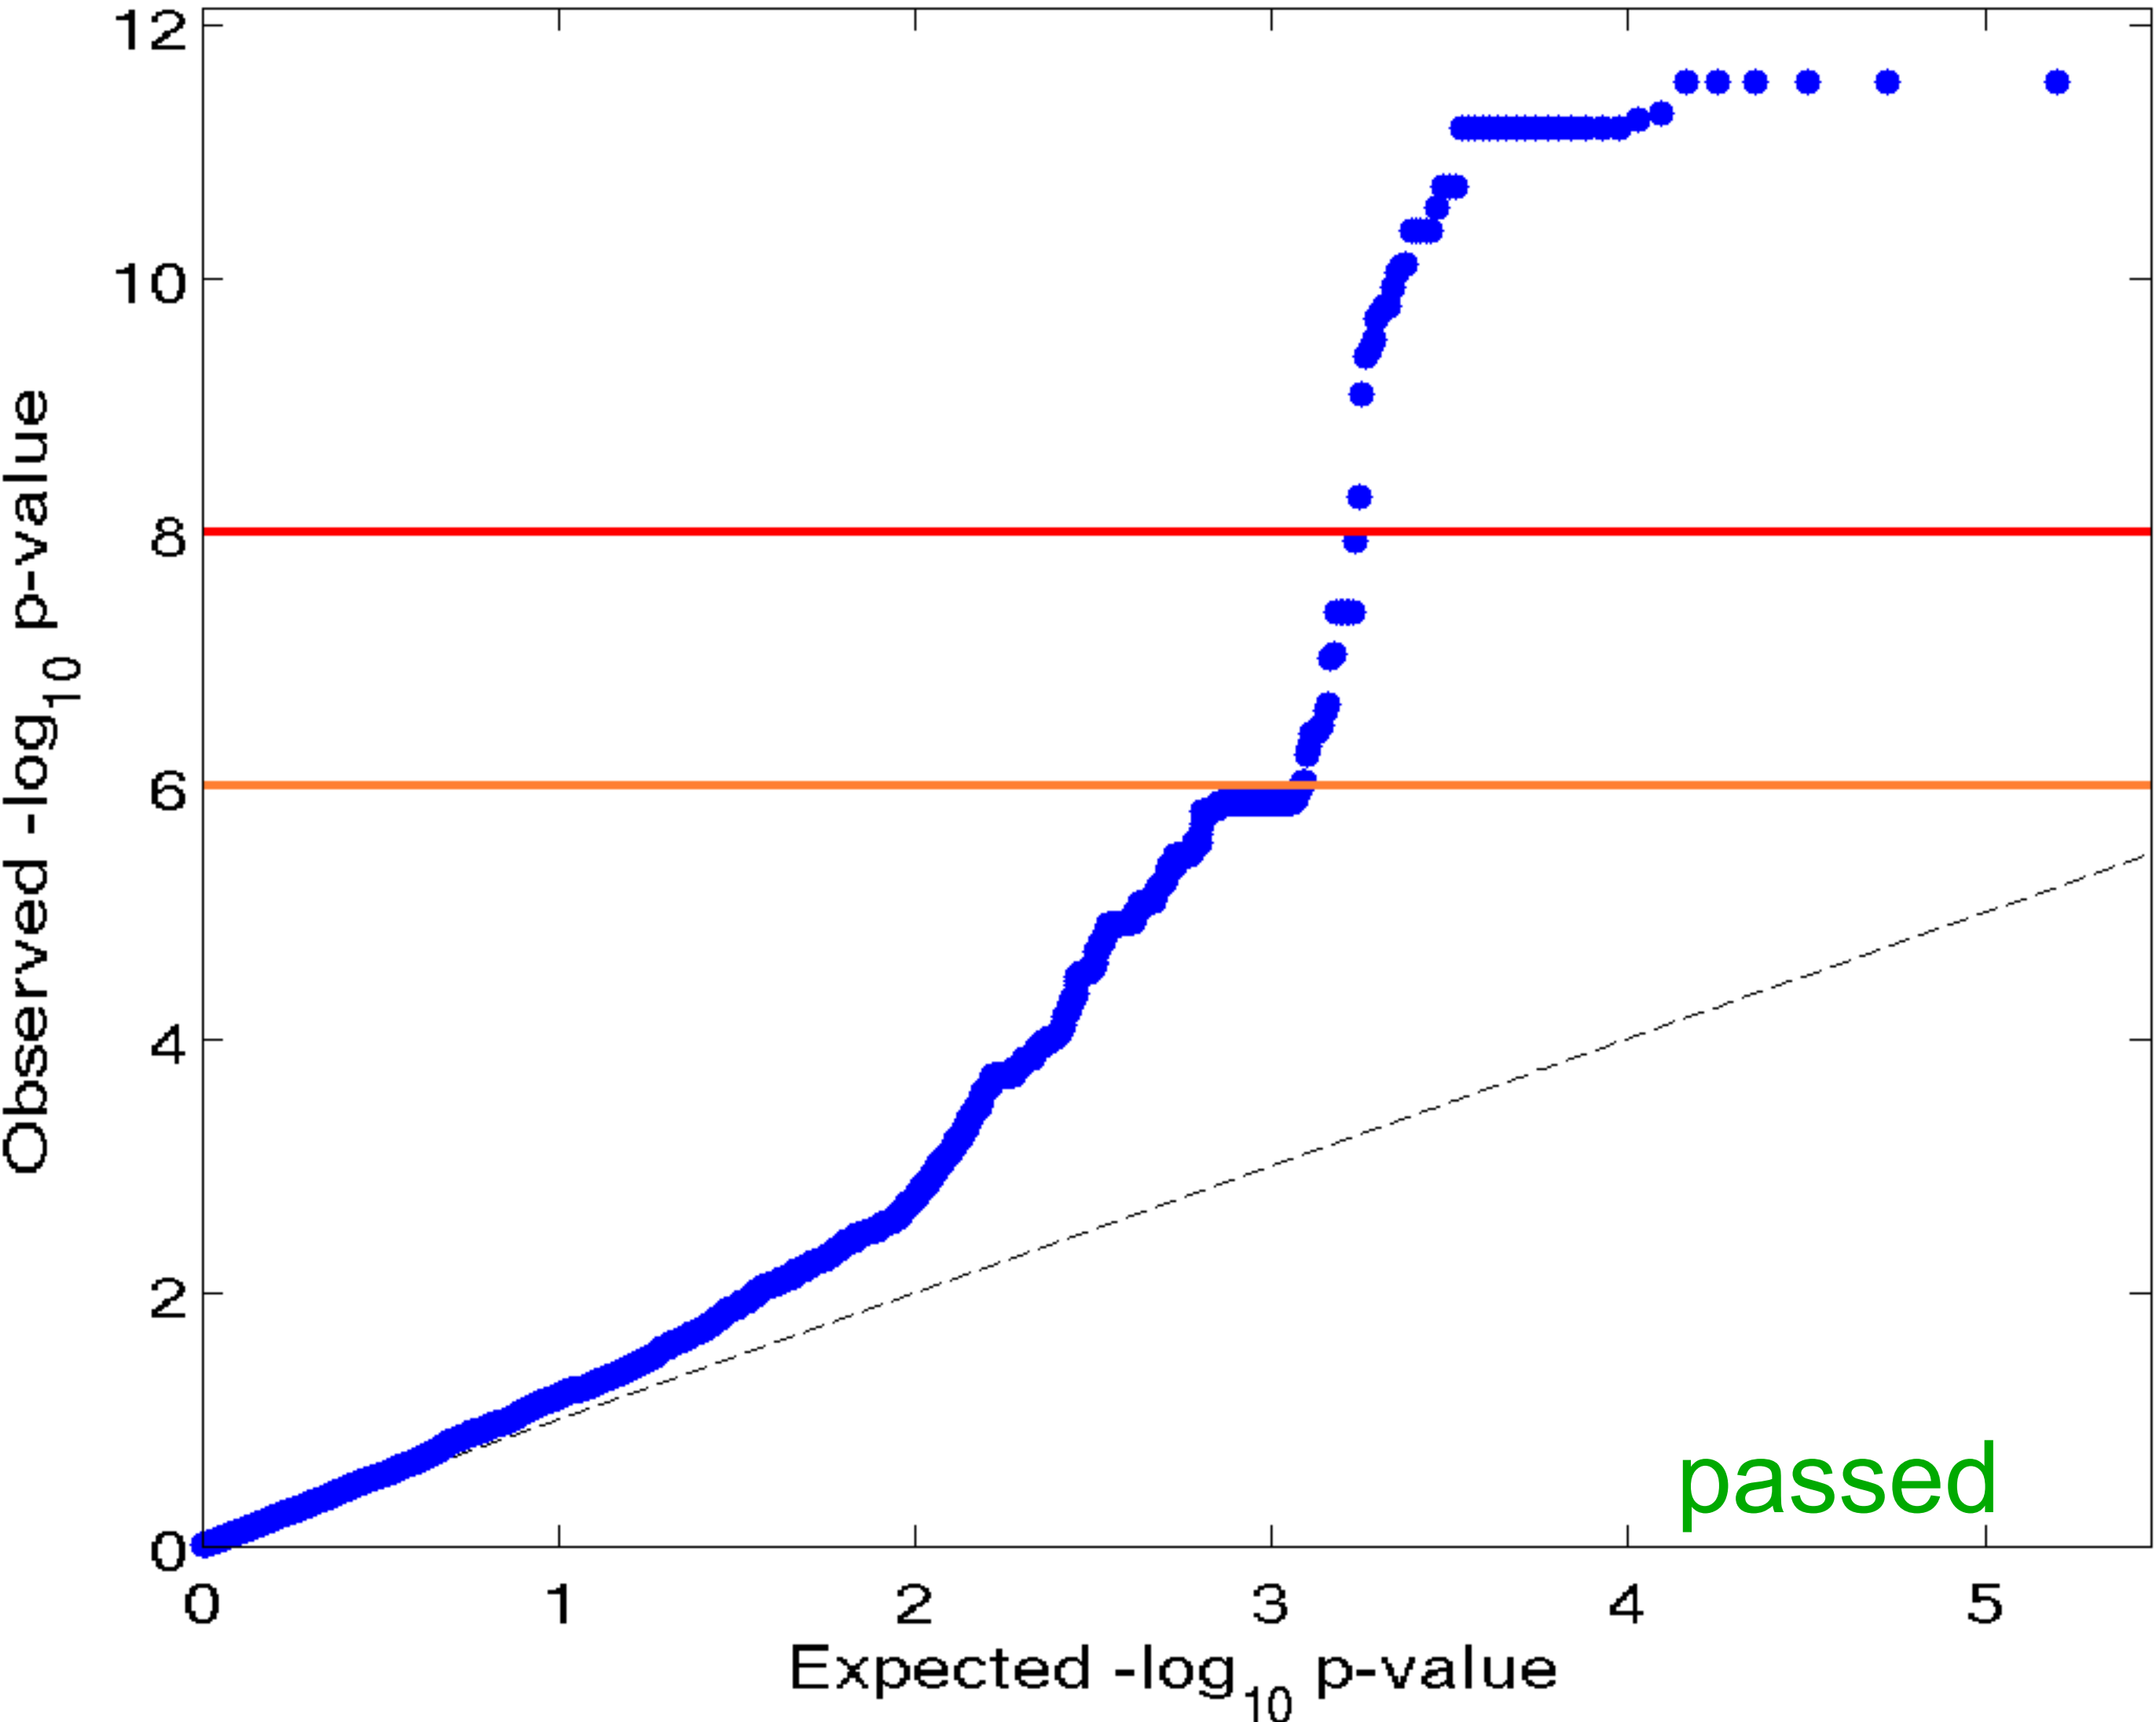



ST - iso10 vs ate

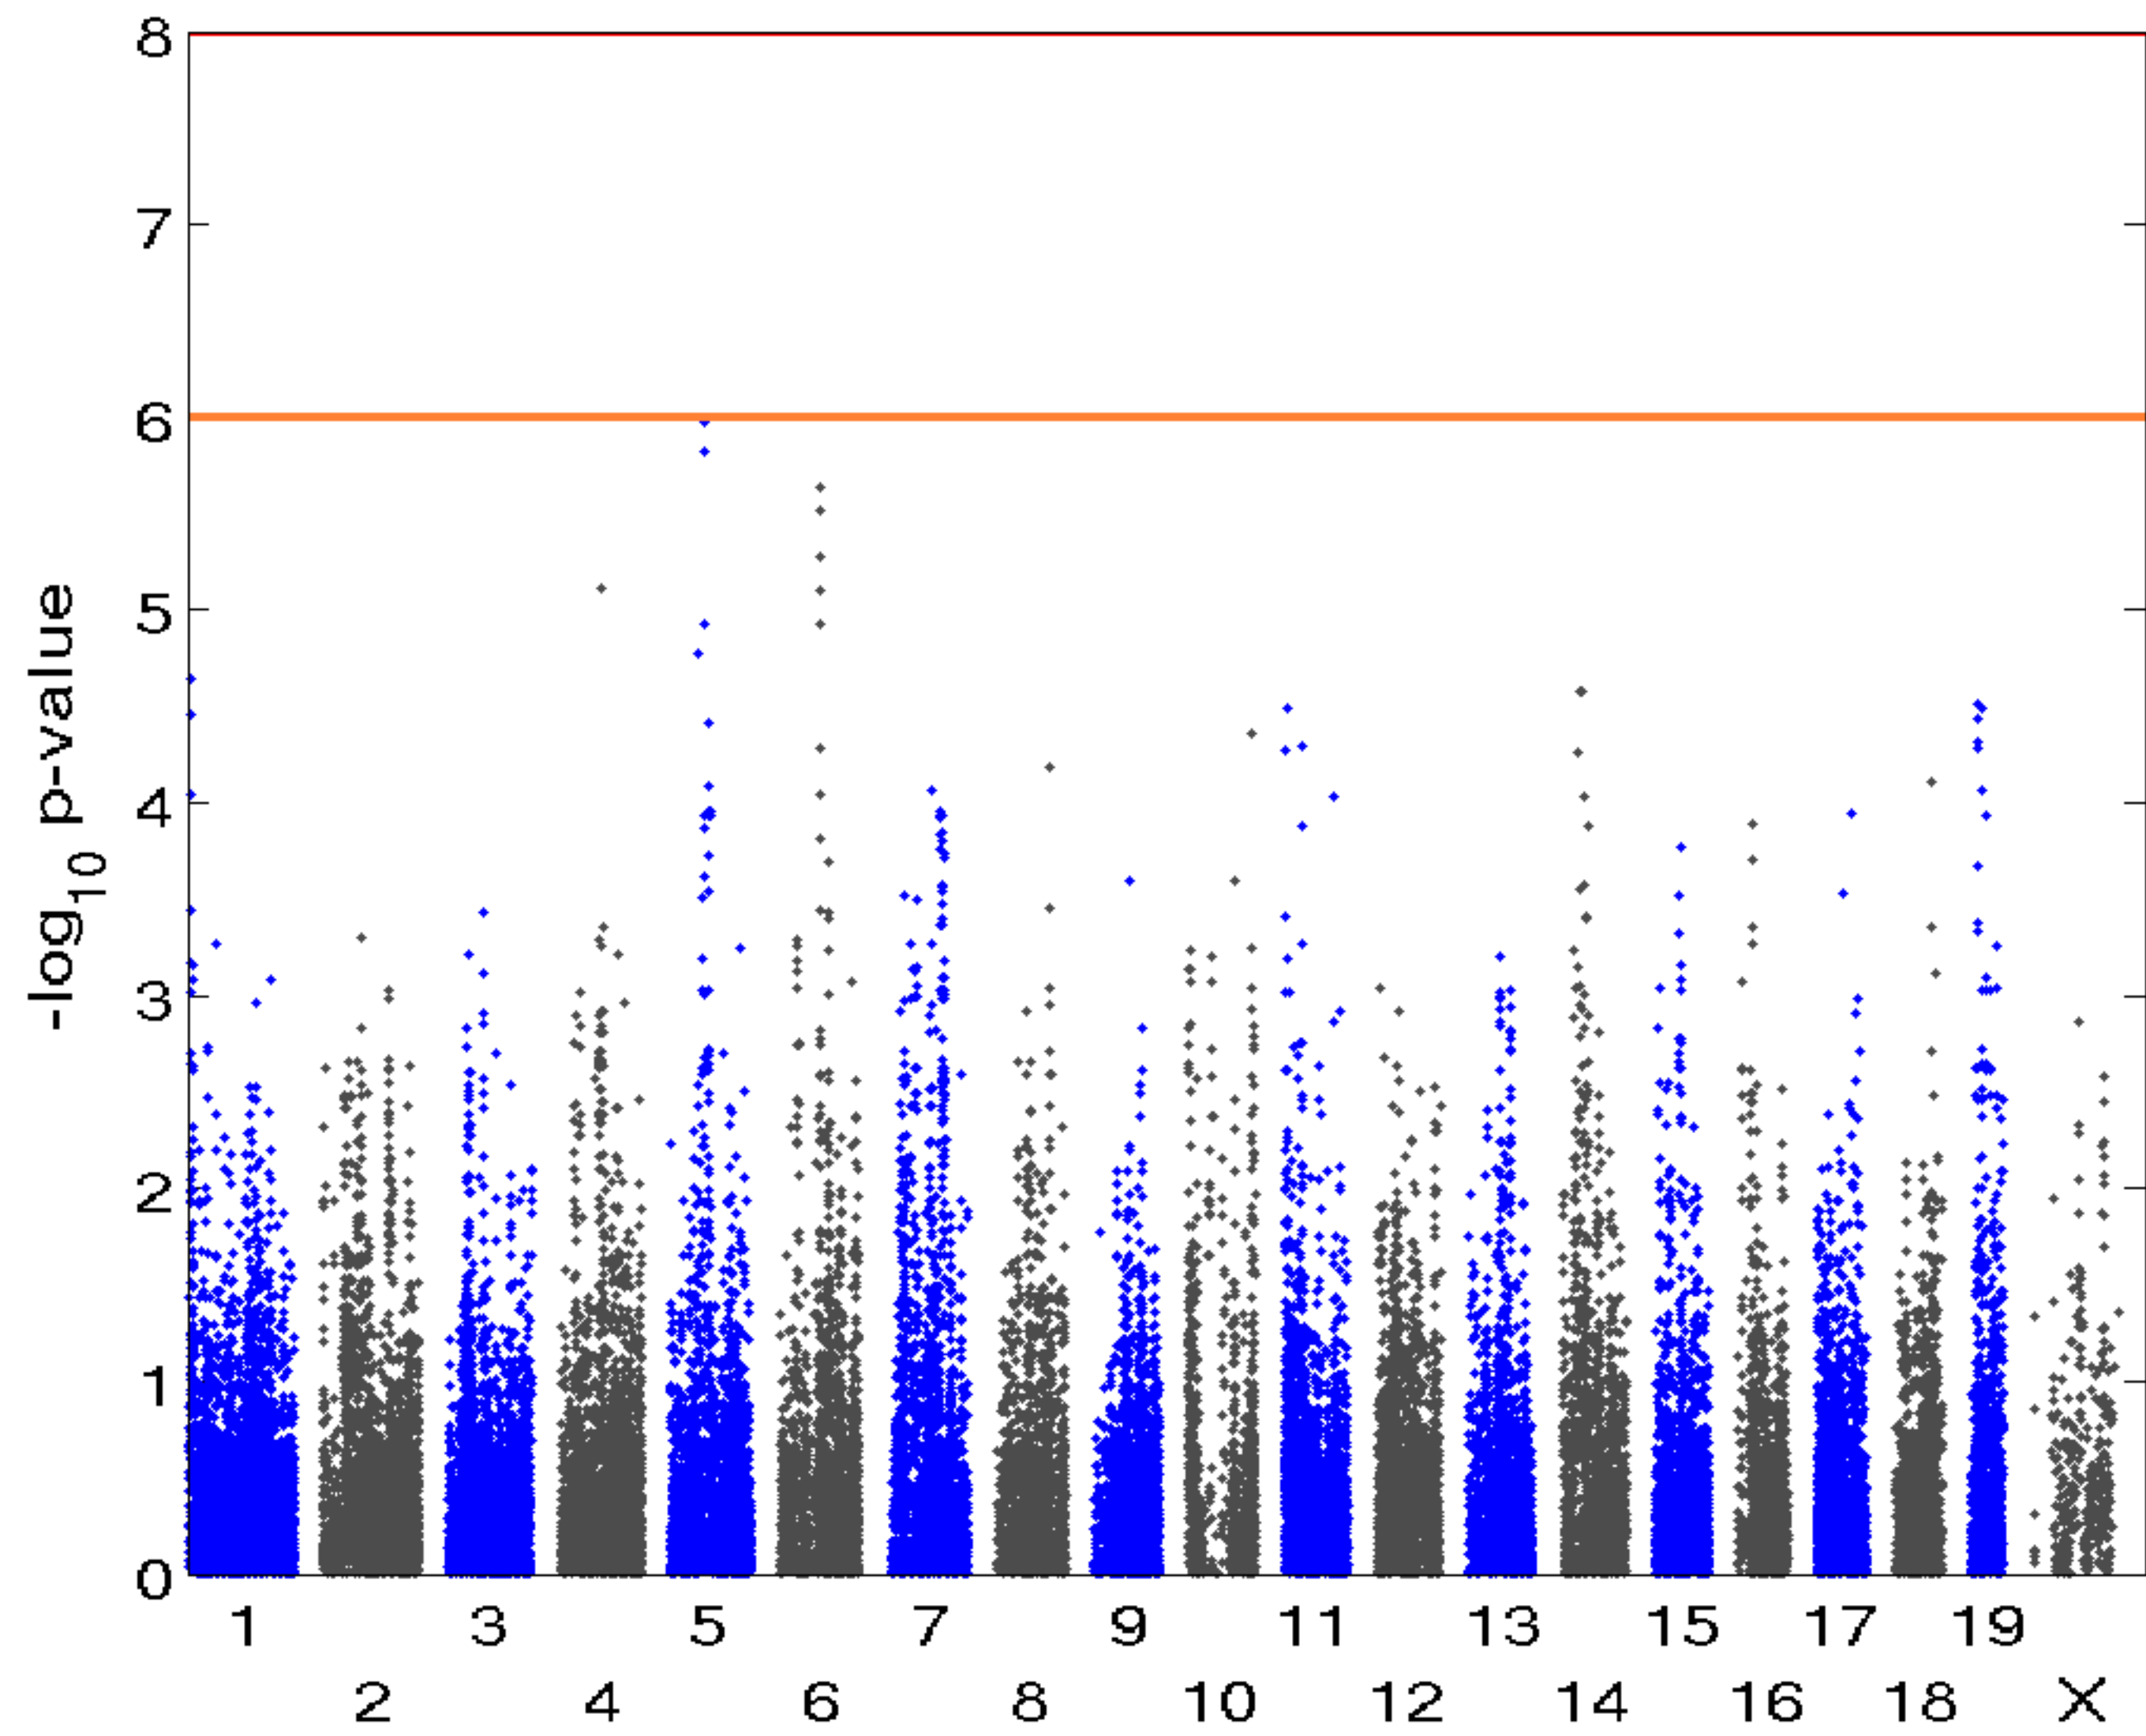

ST - iso10 vs ate

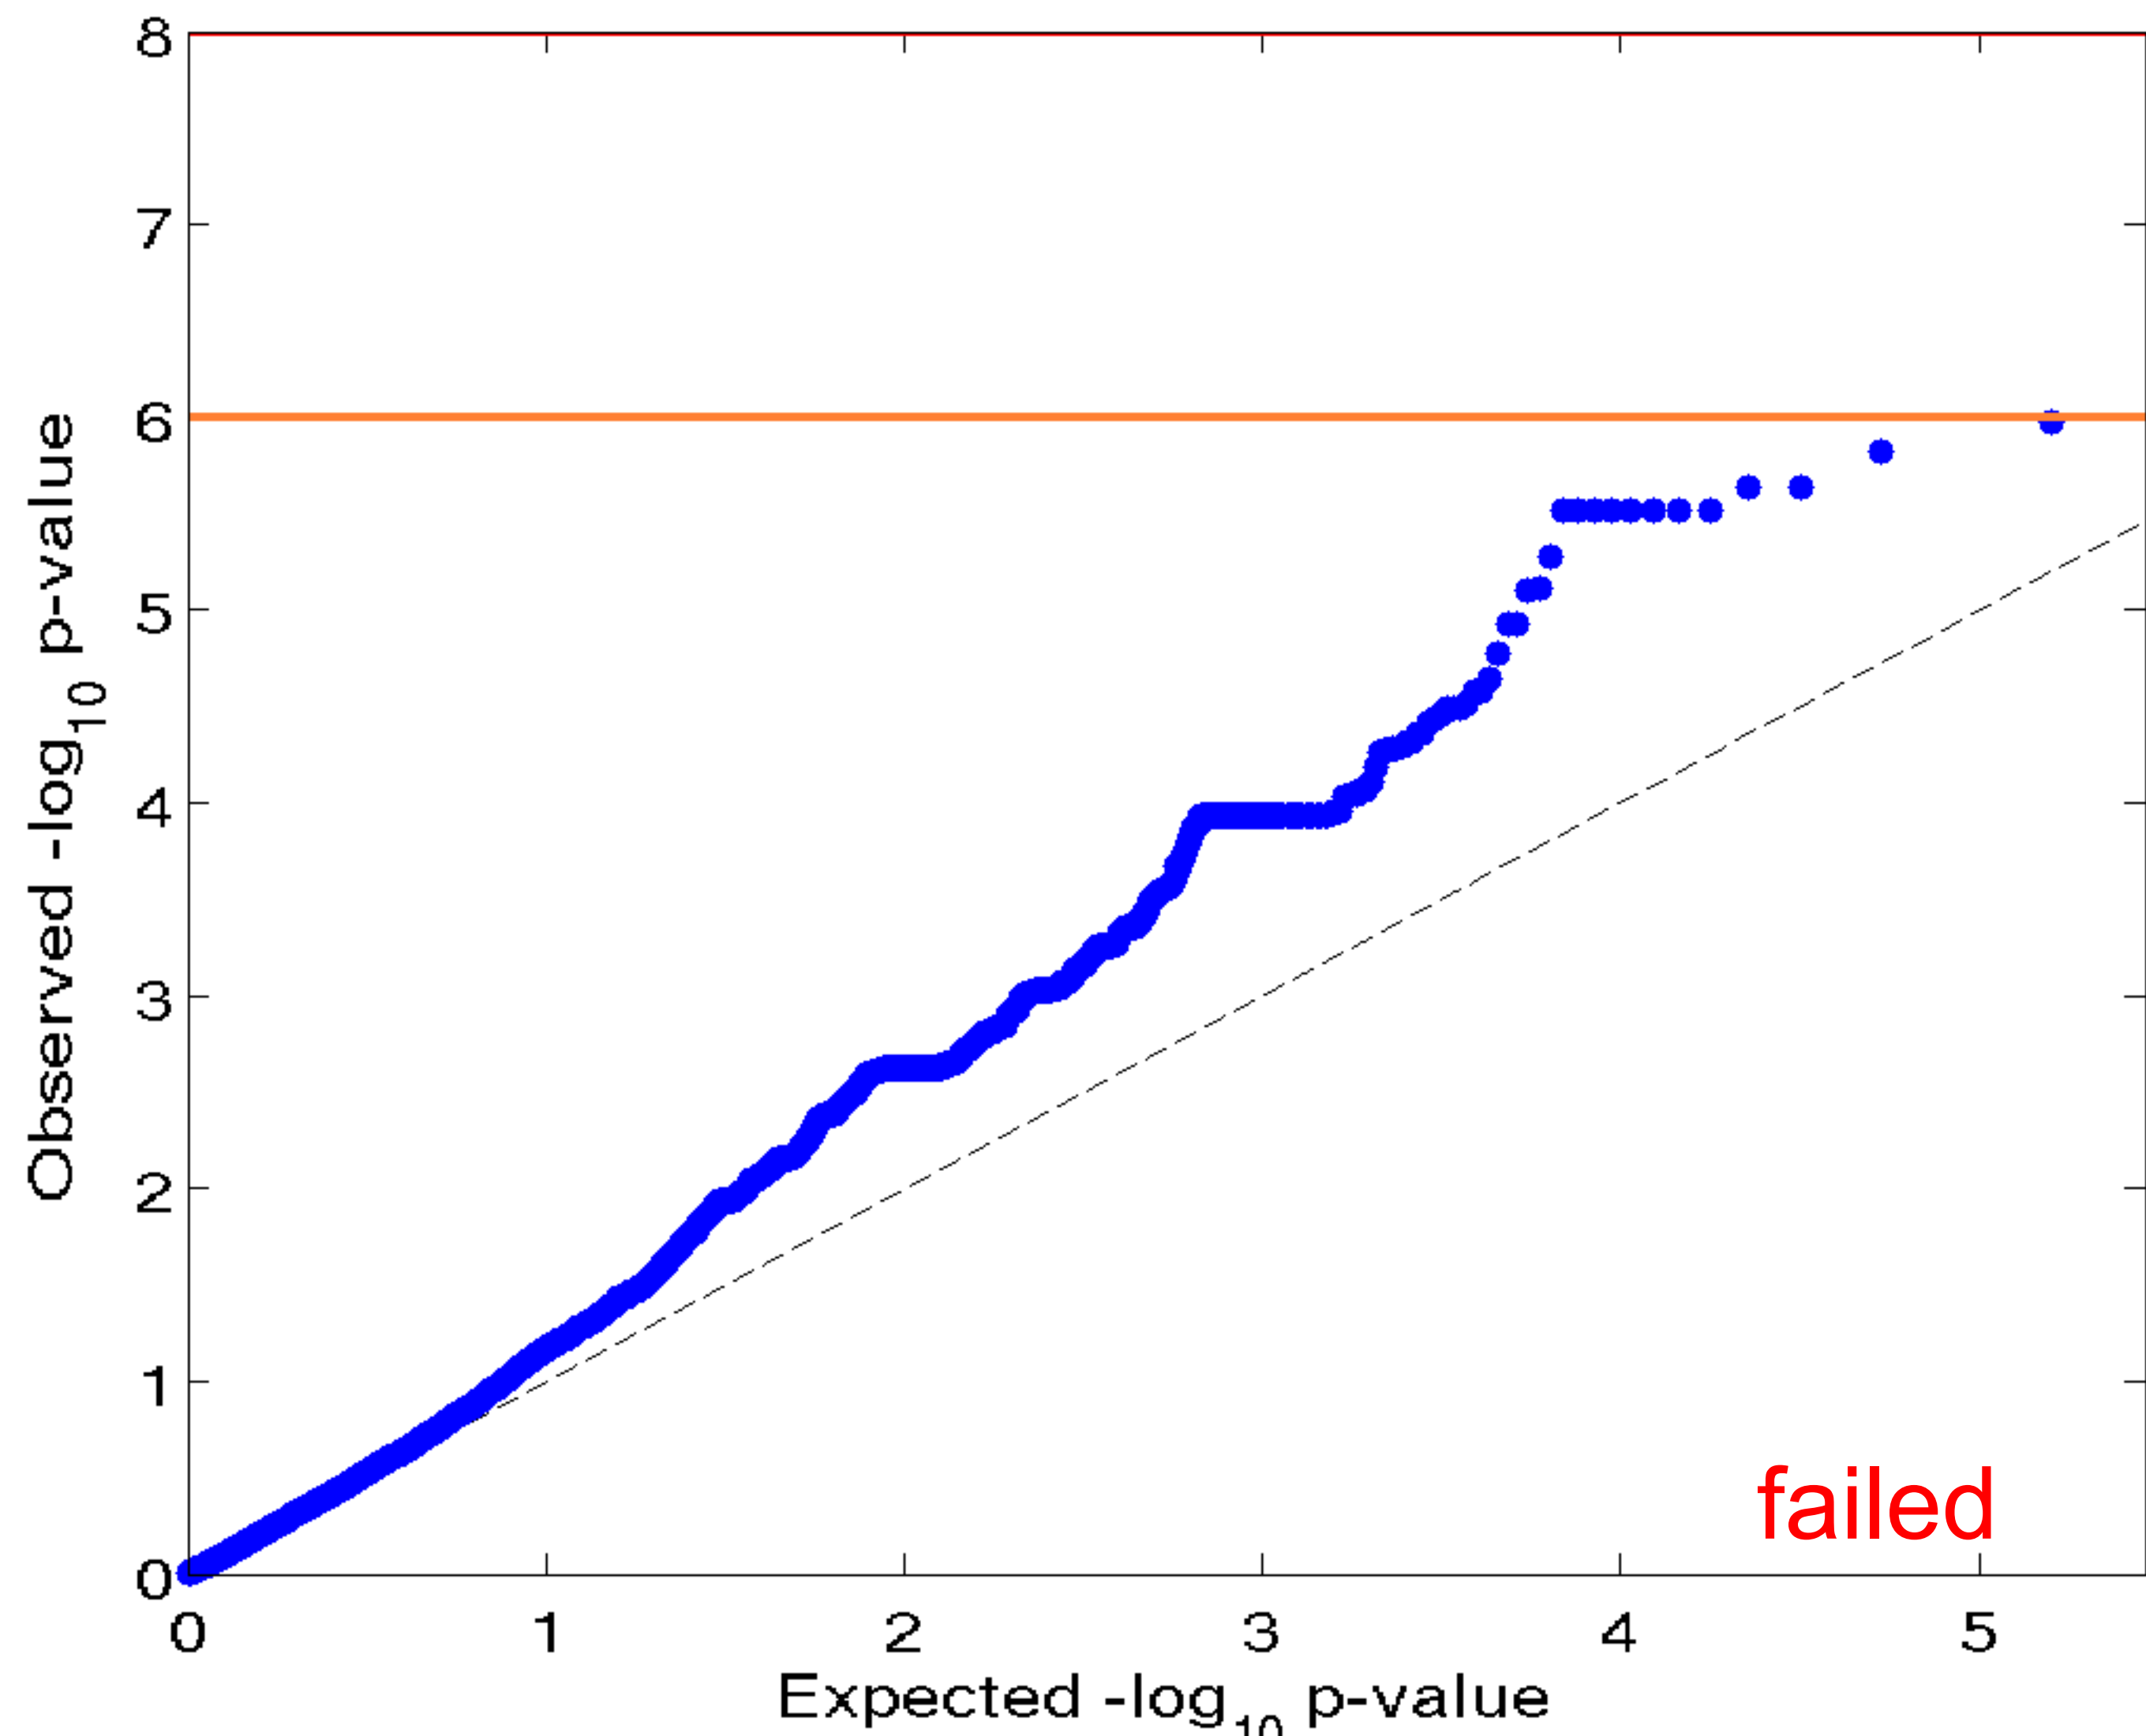

VW/AW - iso10 vs ate

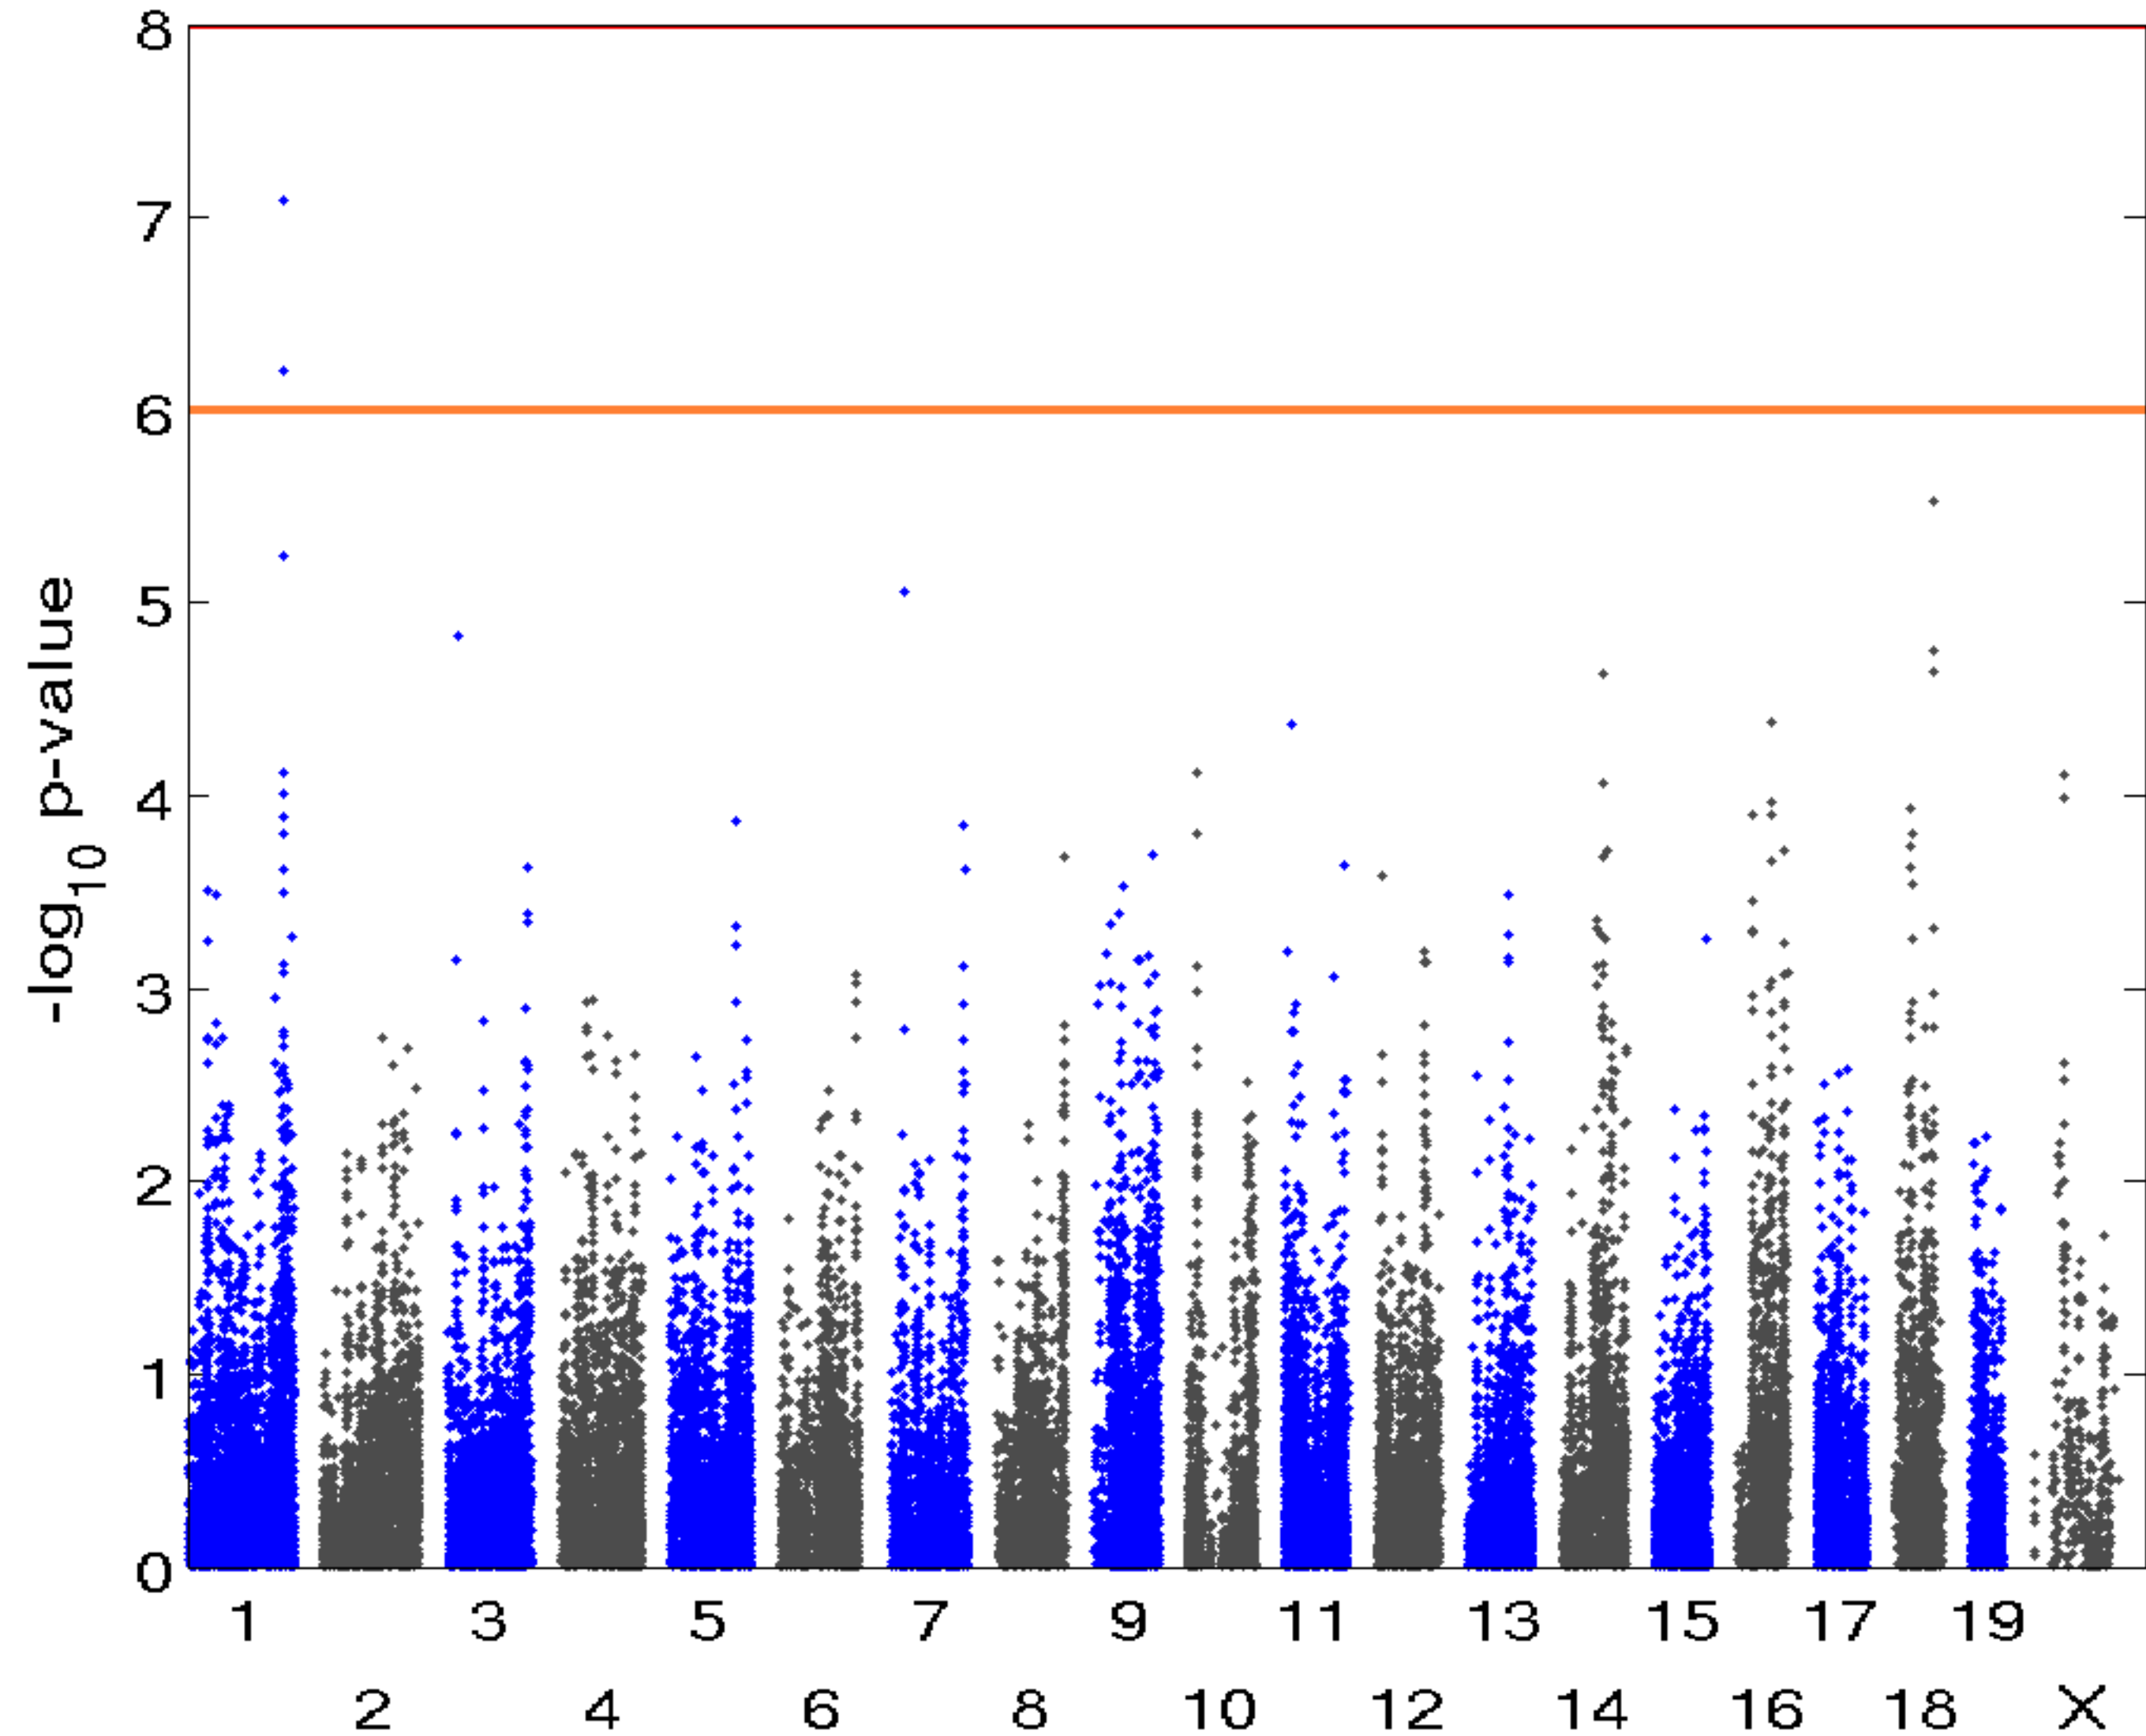

VW/AW - iso10 vs ate

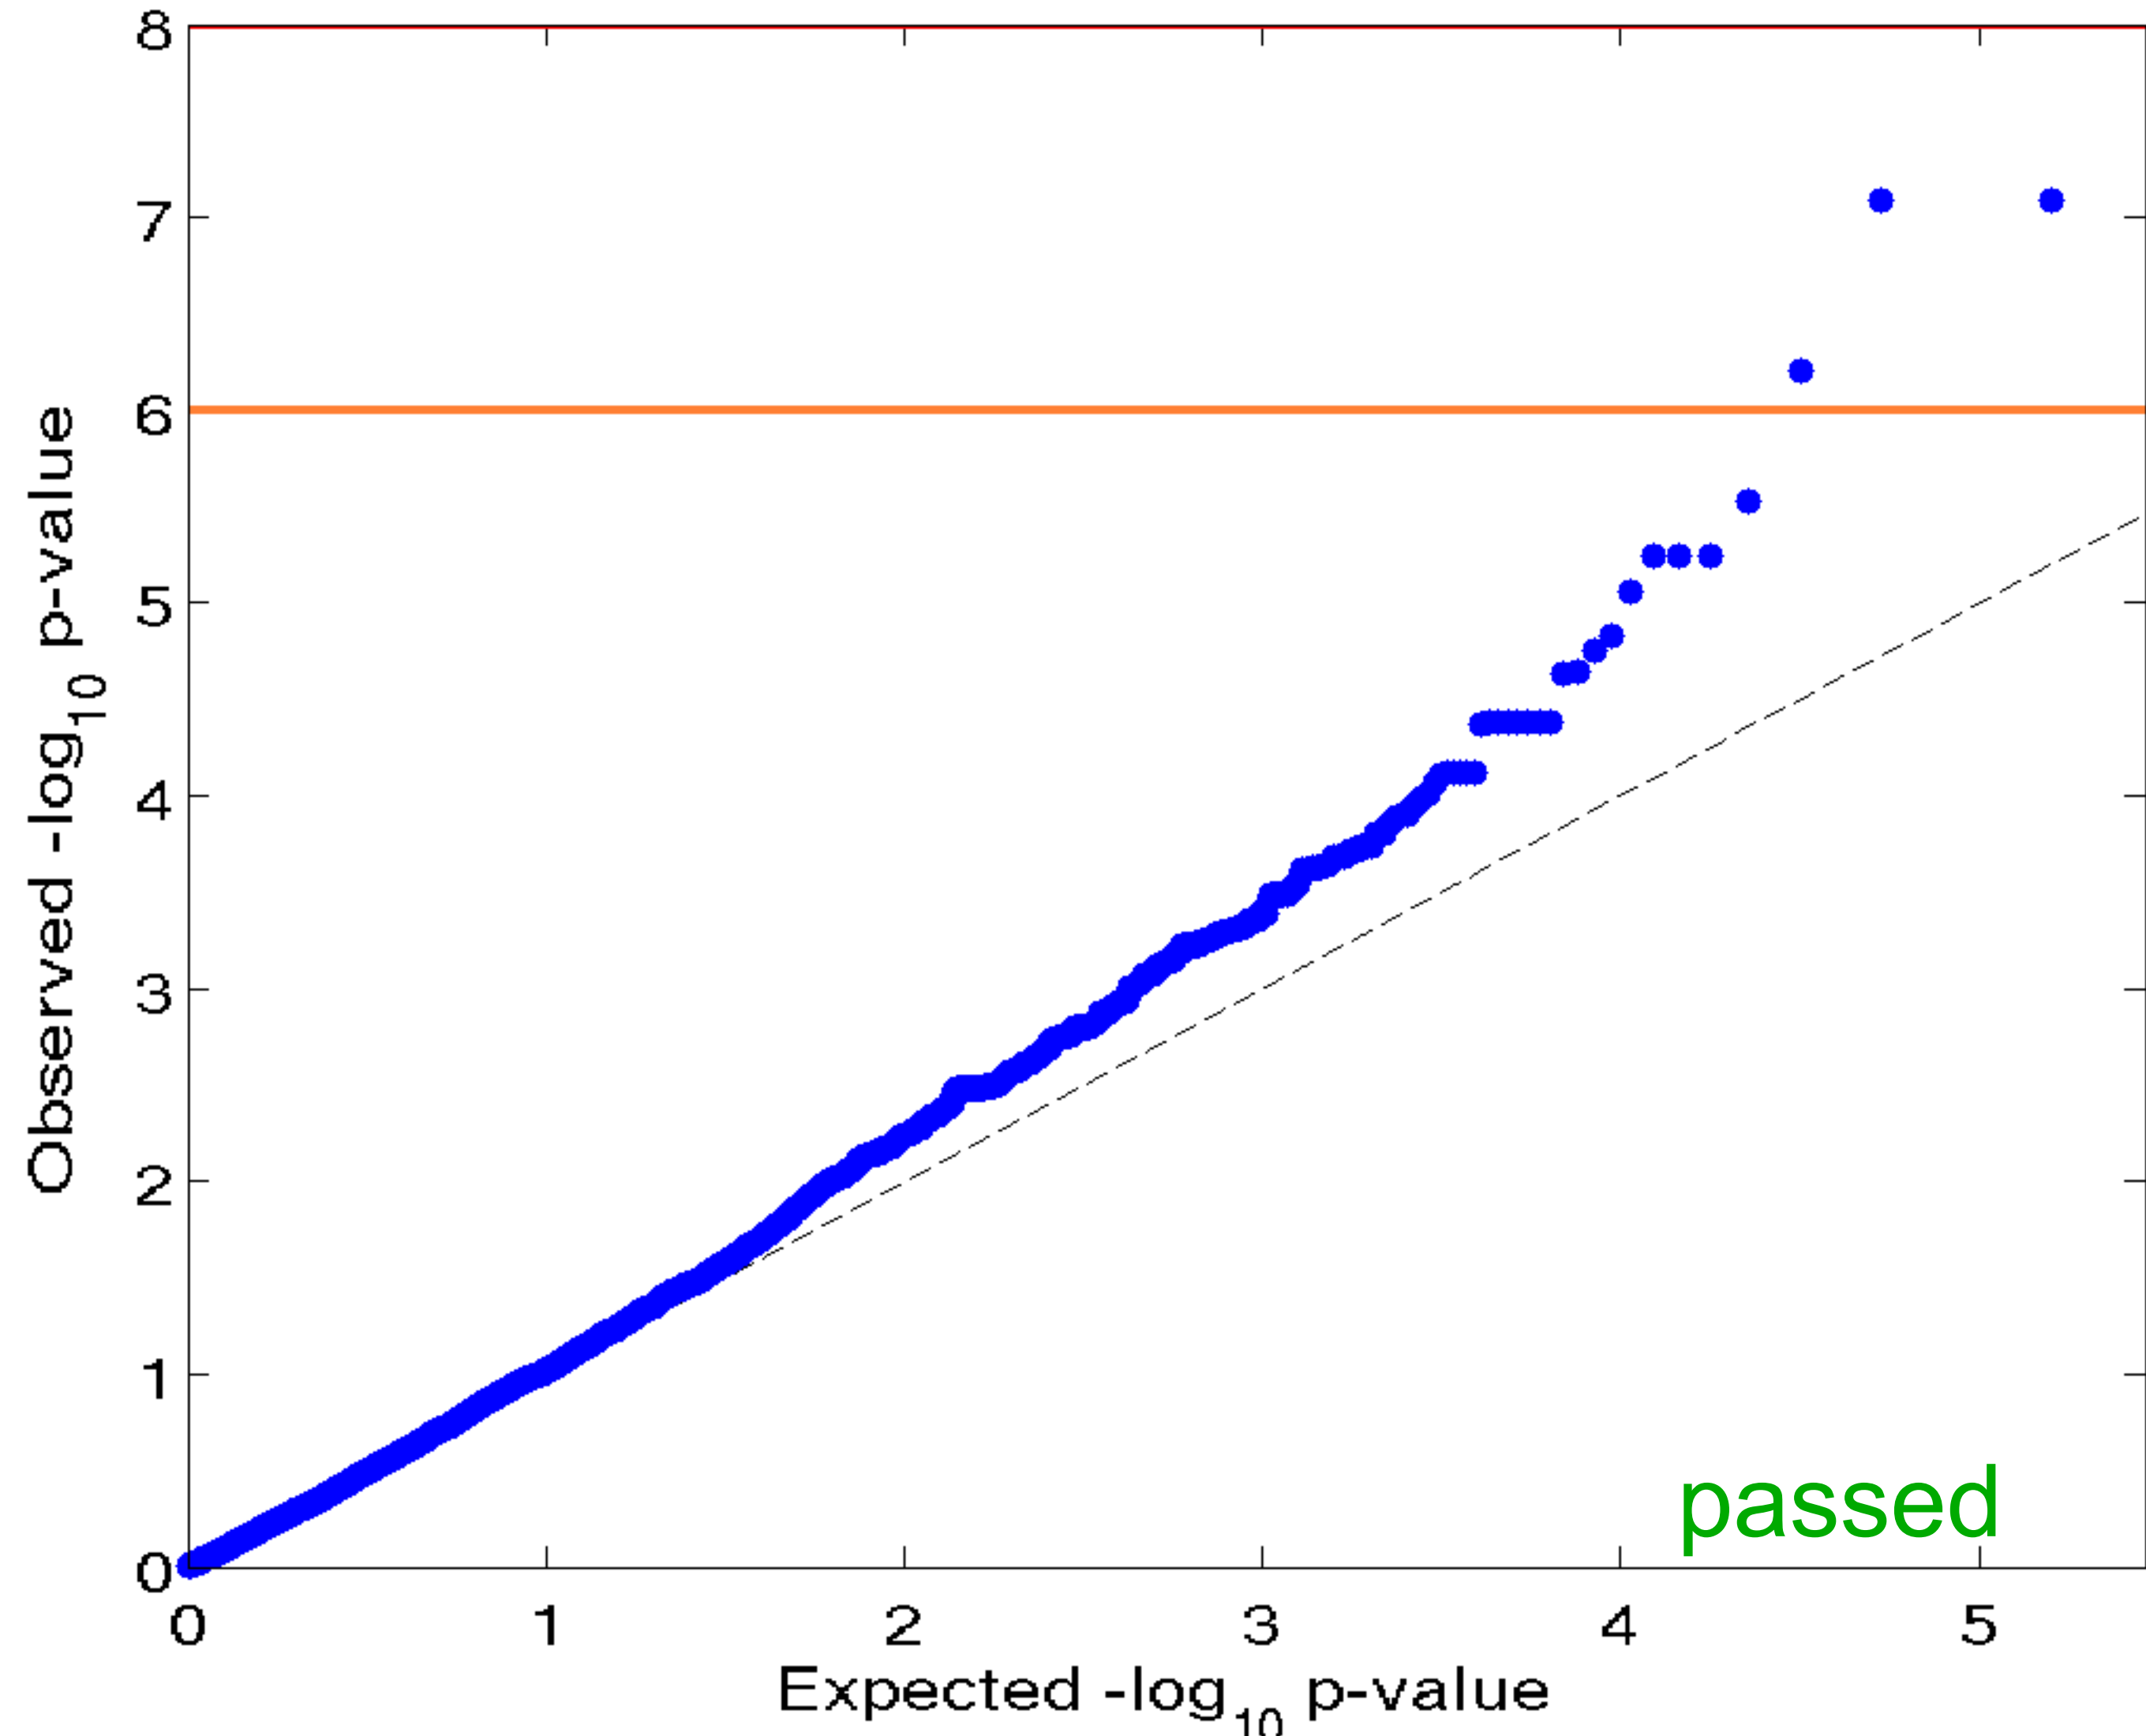

VW/BWS - iso10 vs ate

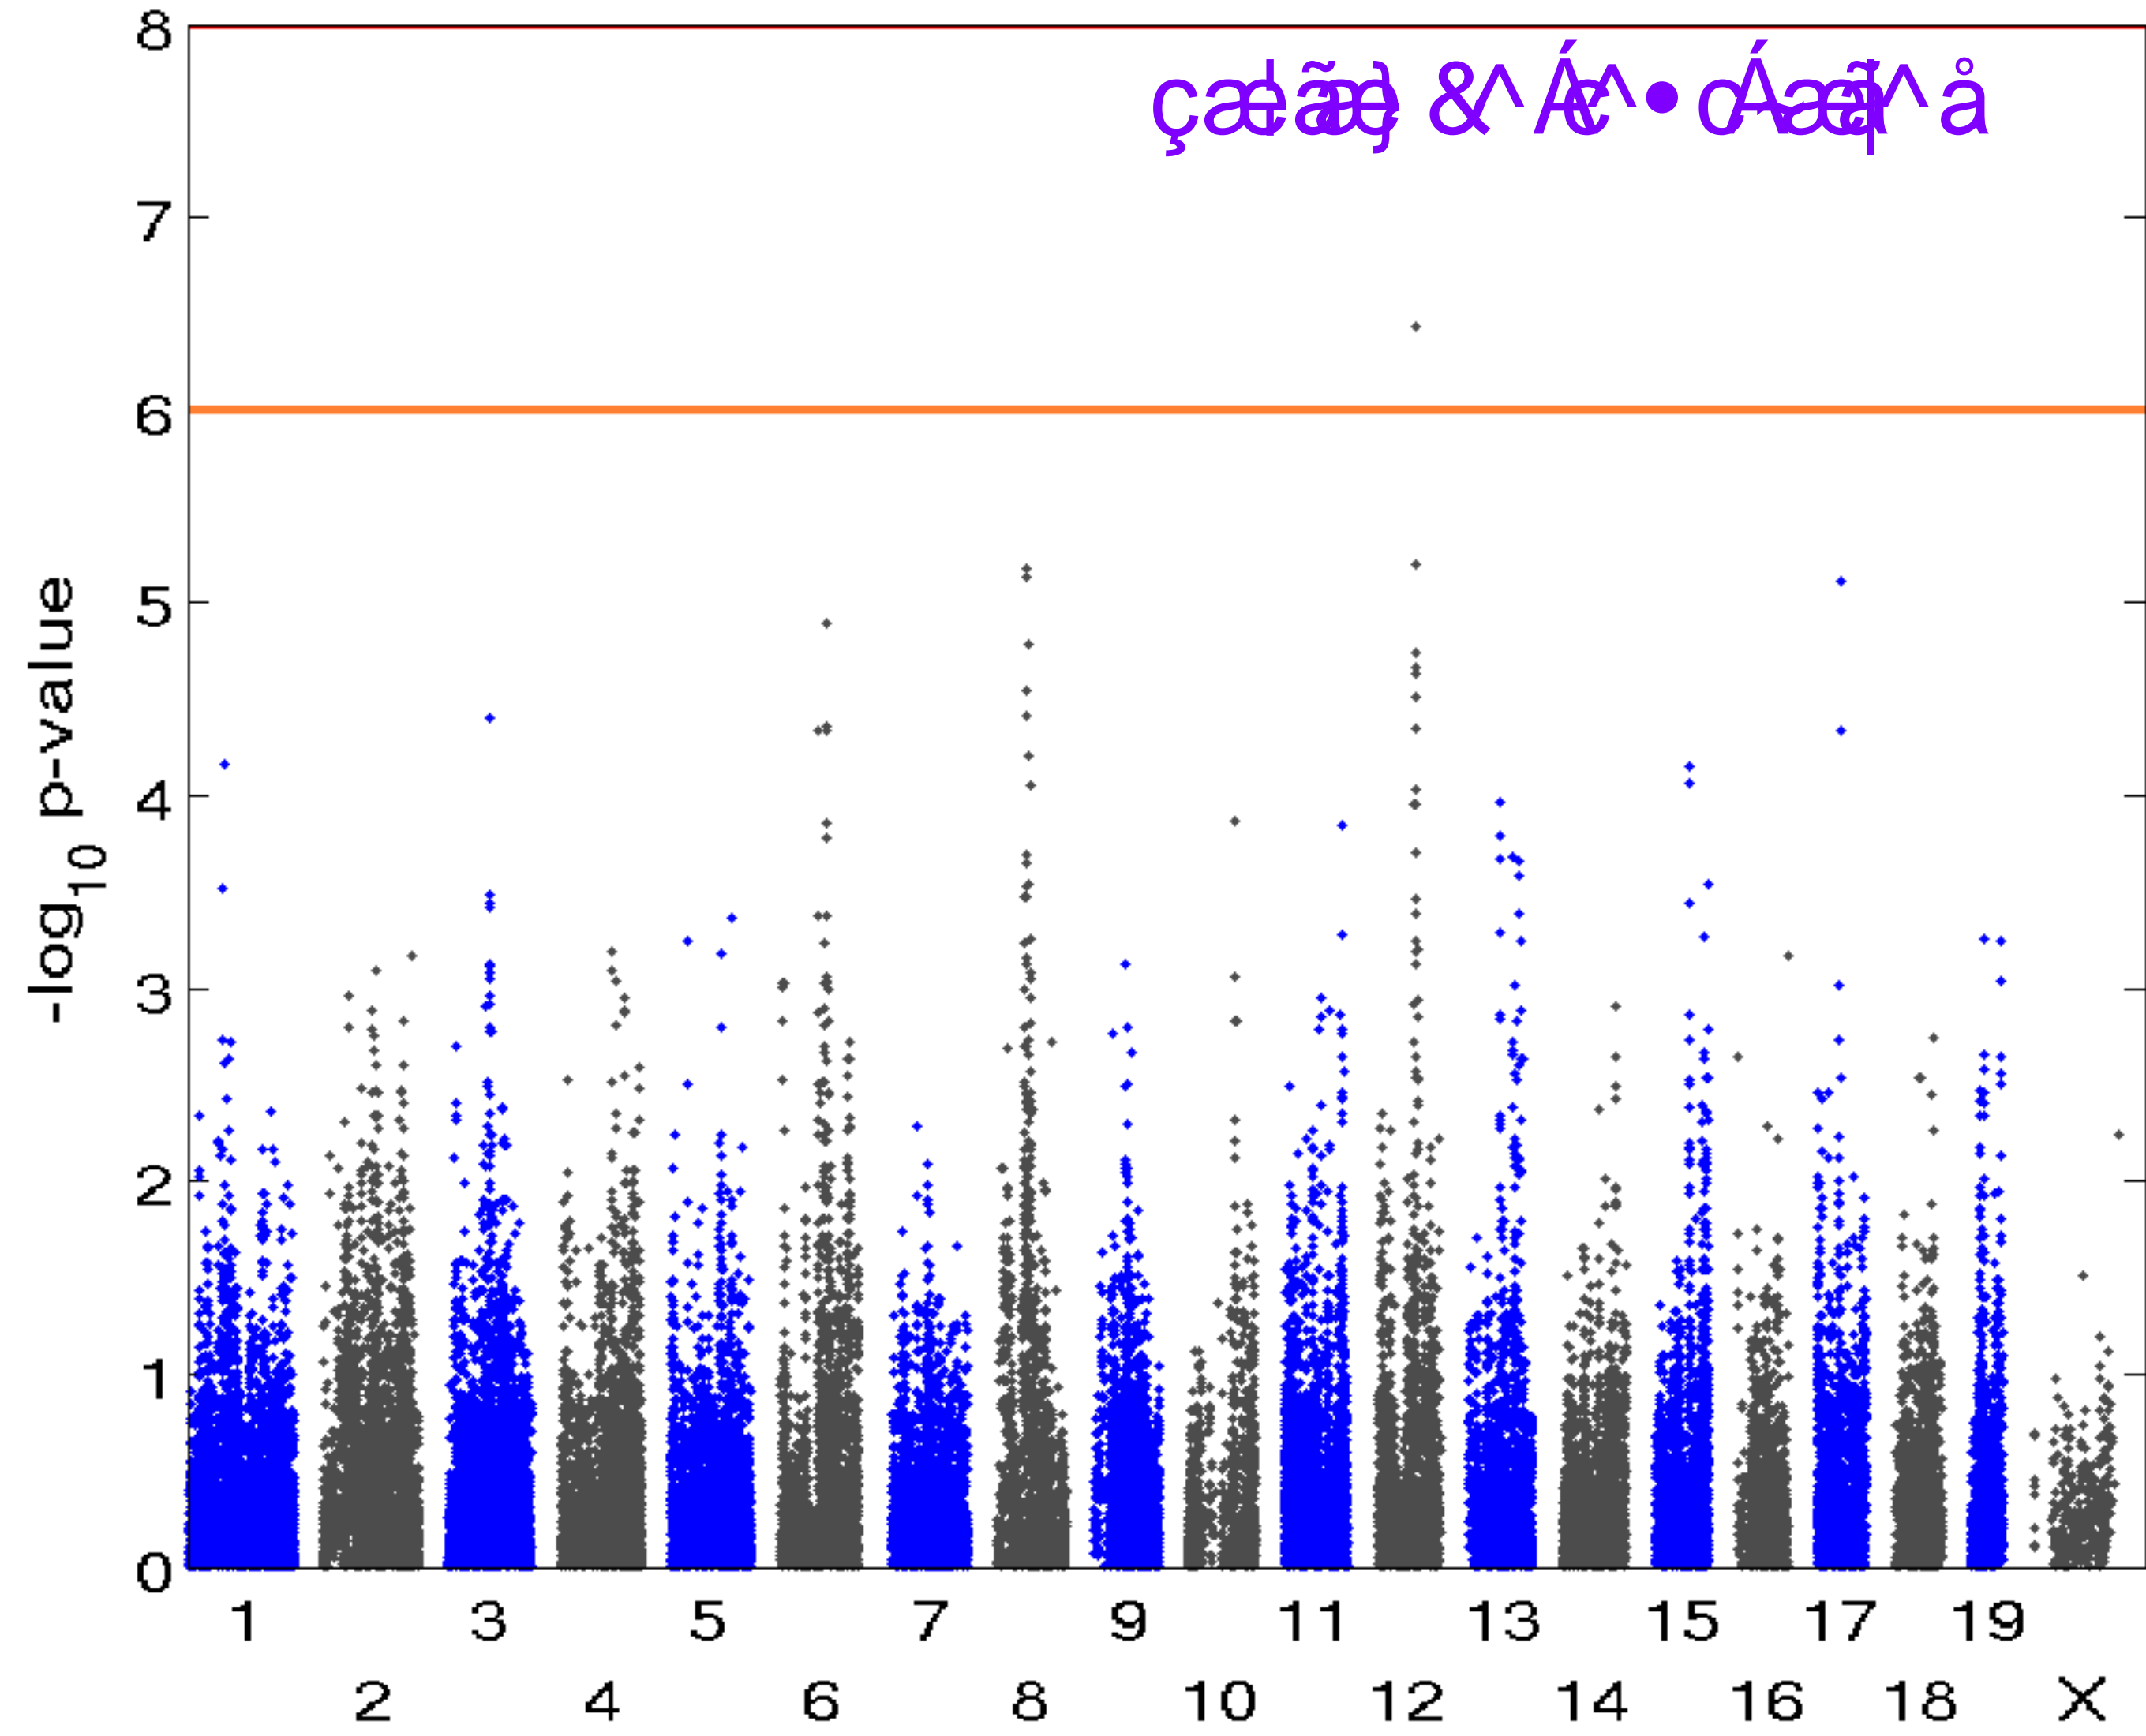

VW/BWS - iso10 vs ate

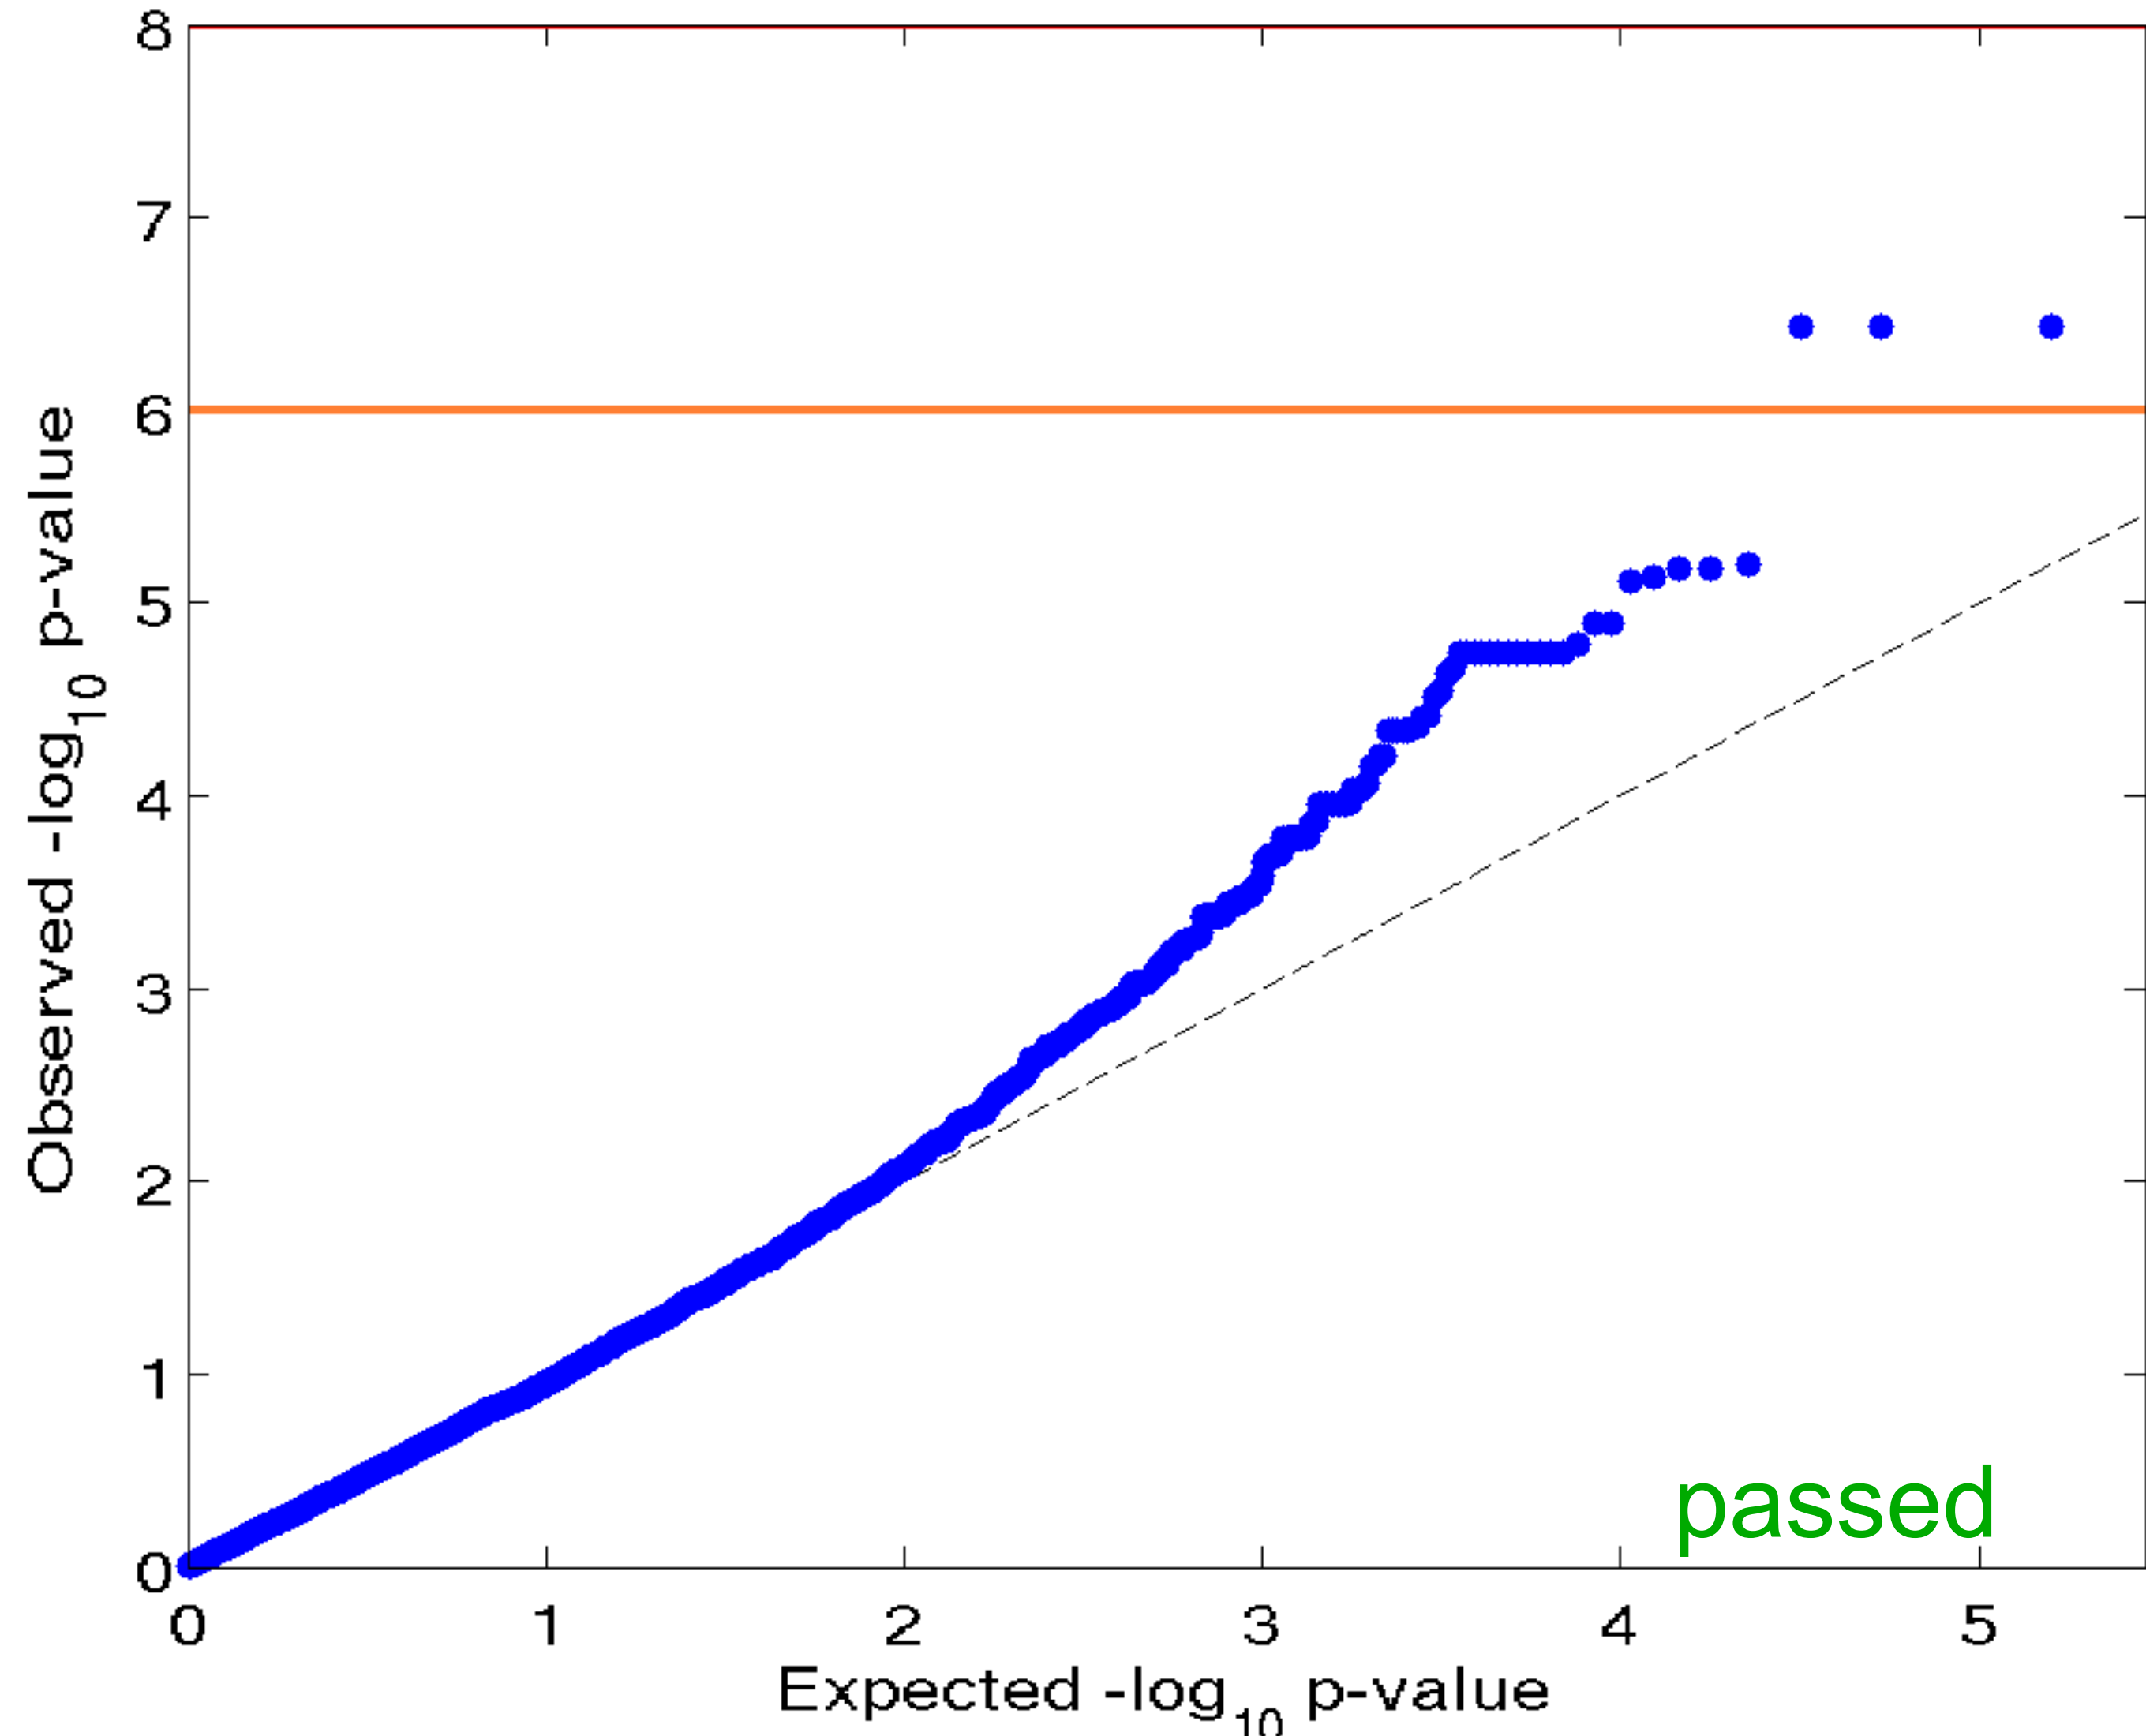

VWI - iso10 vs ate

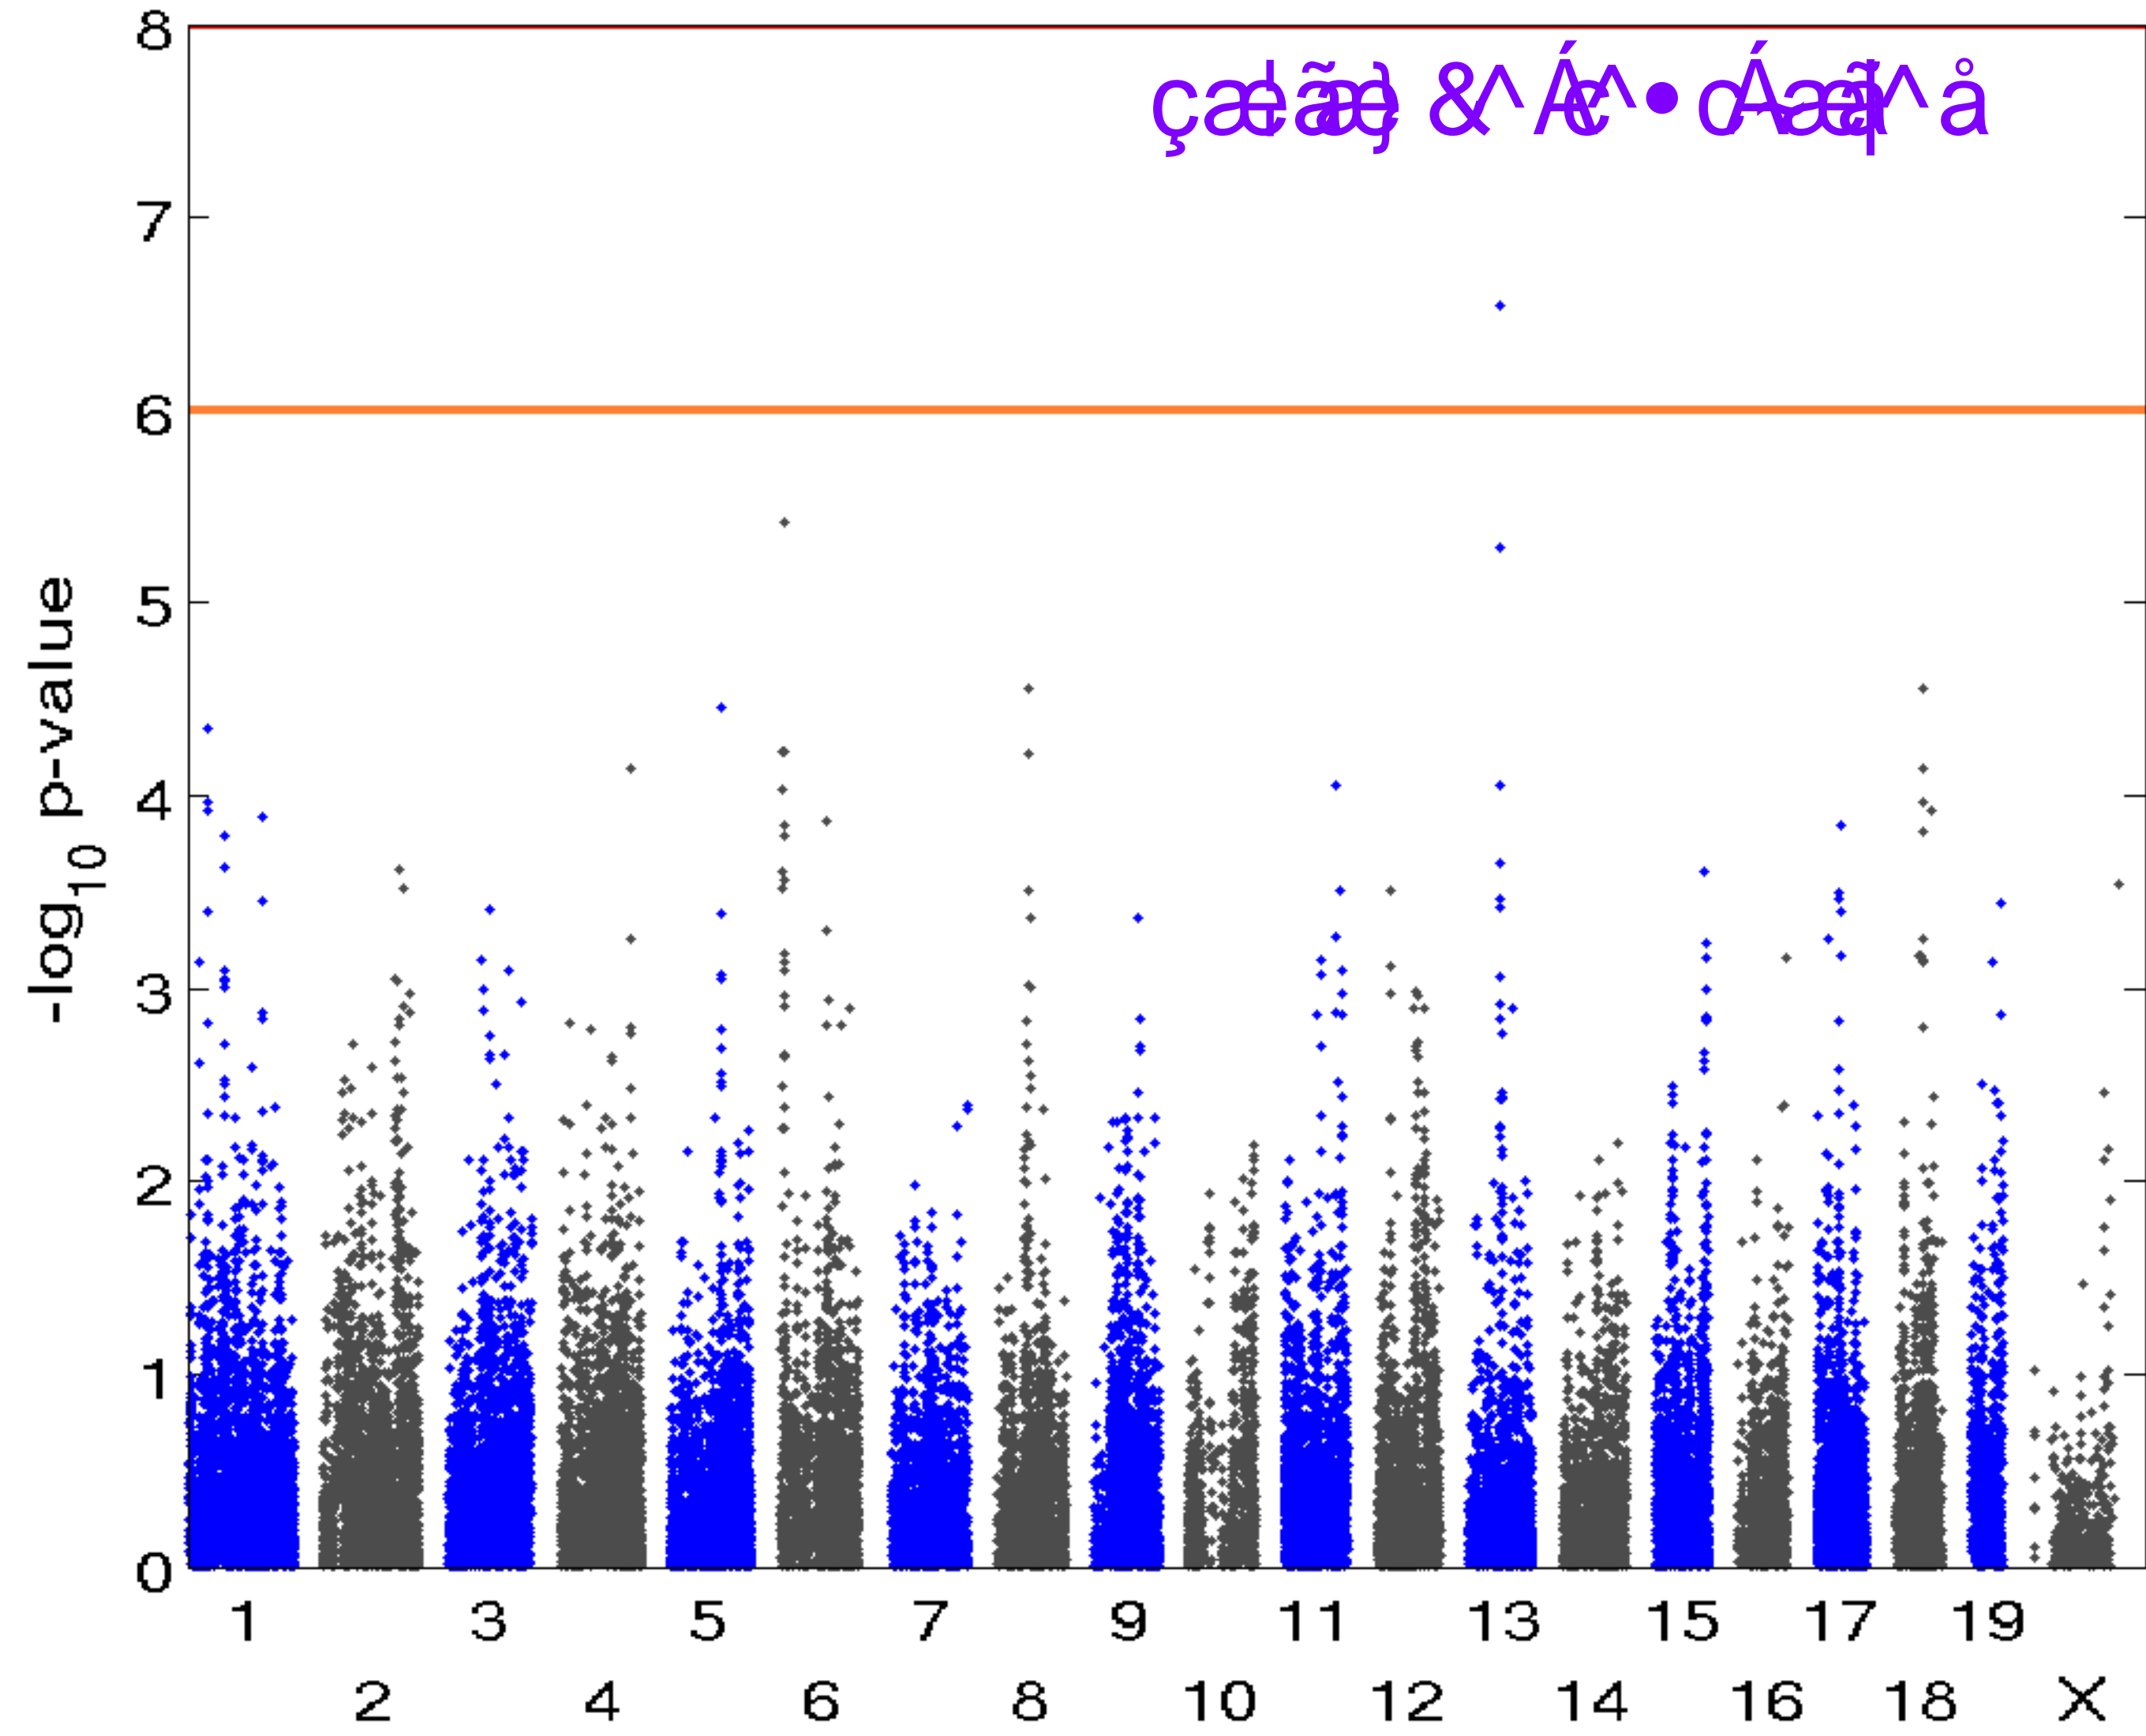

VWI - iso10 vs ate

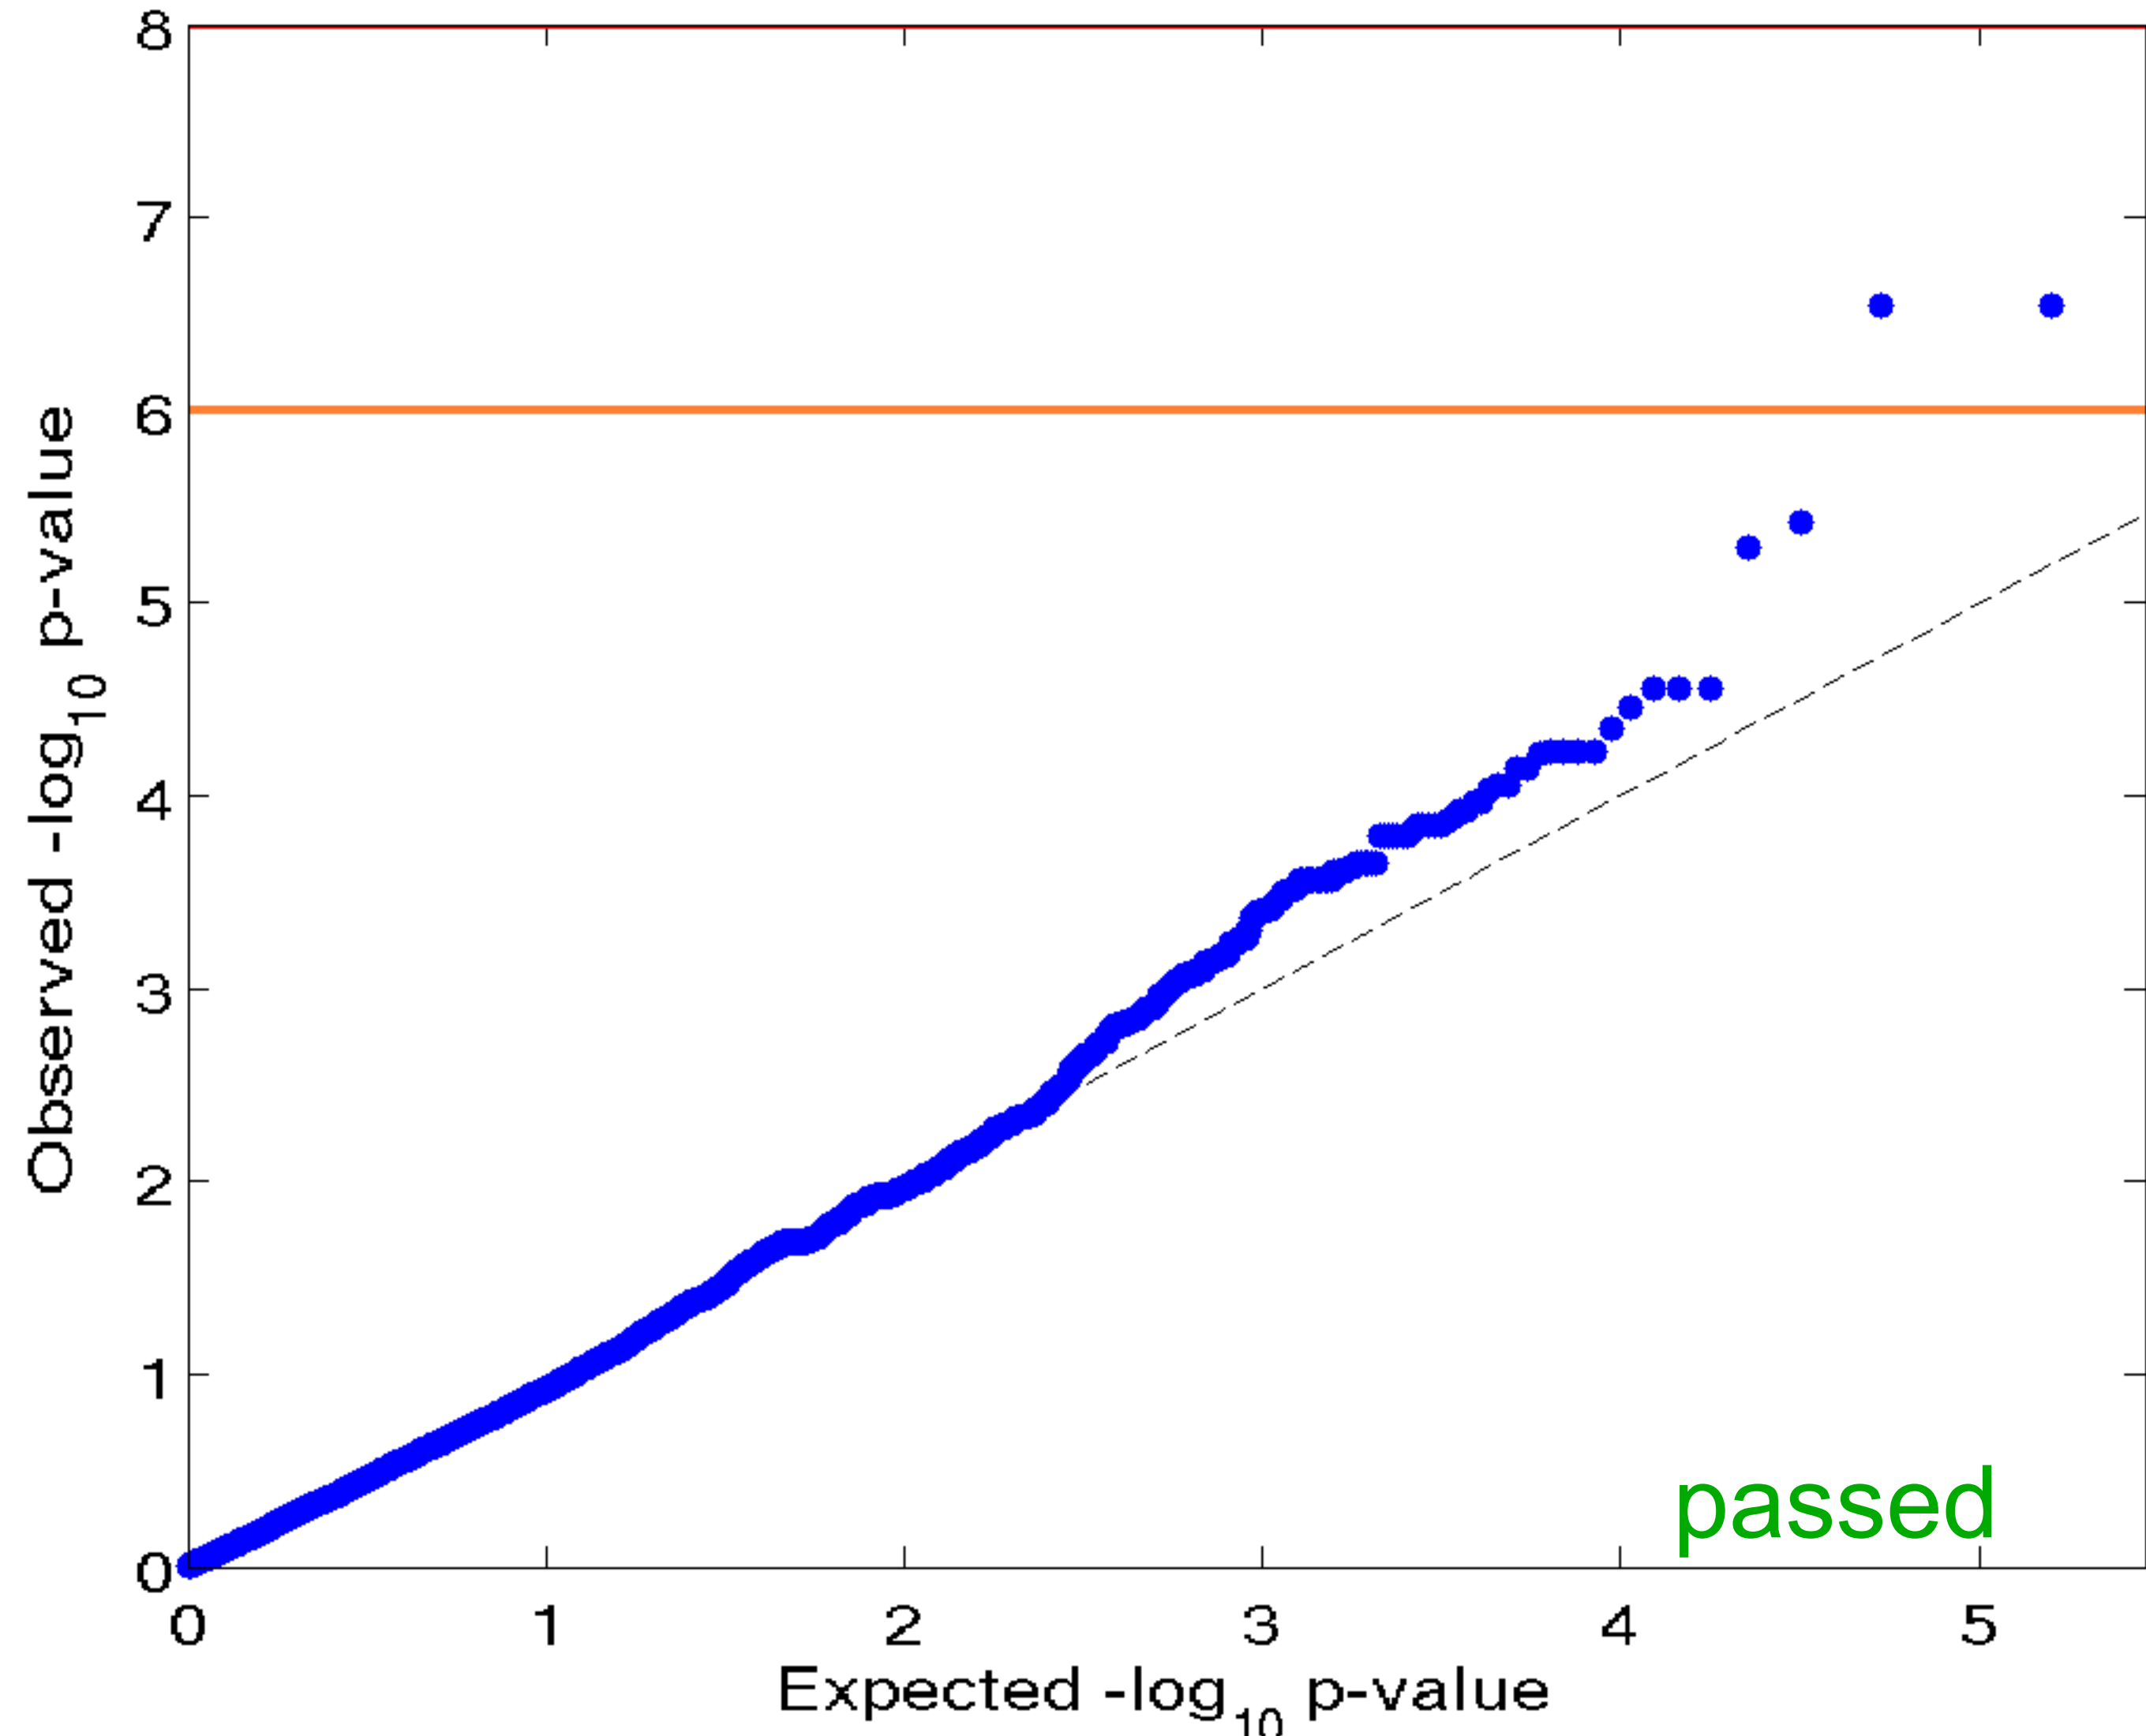

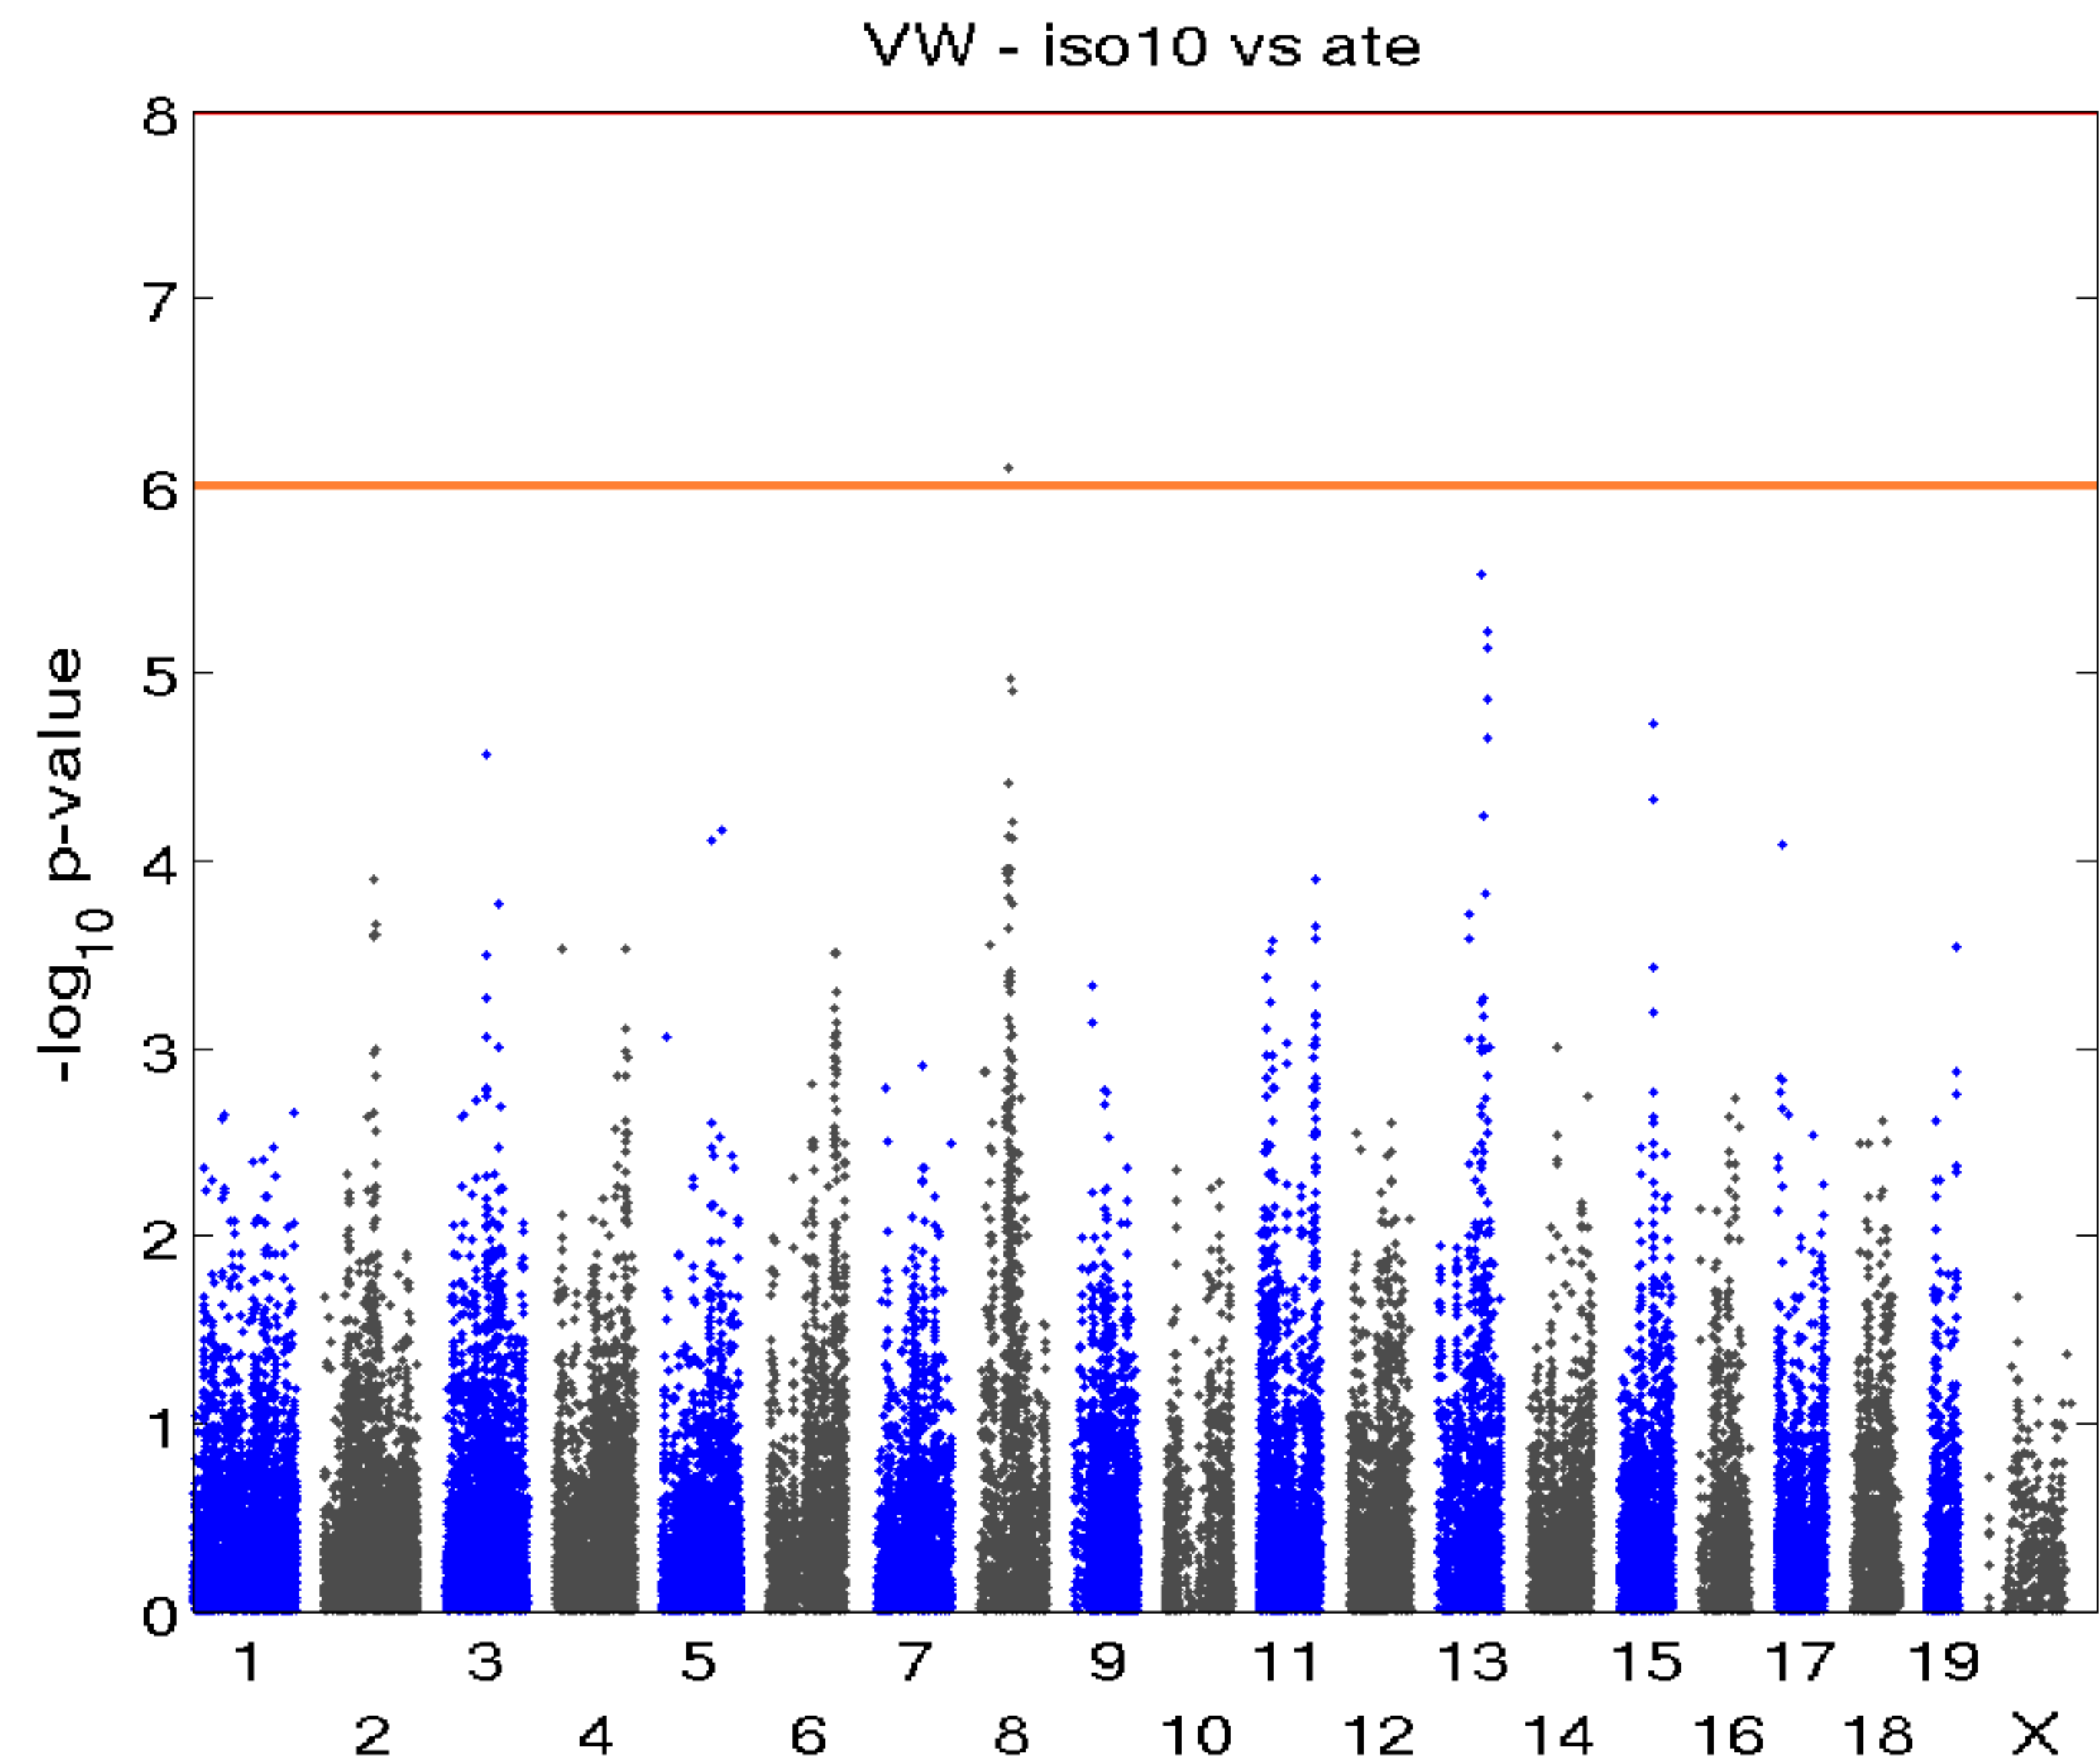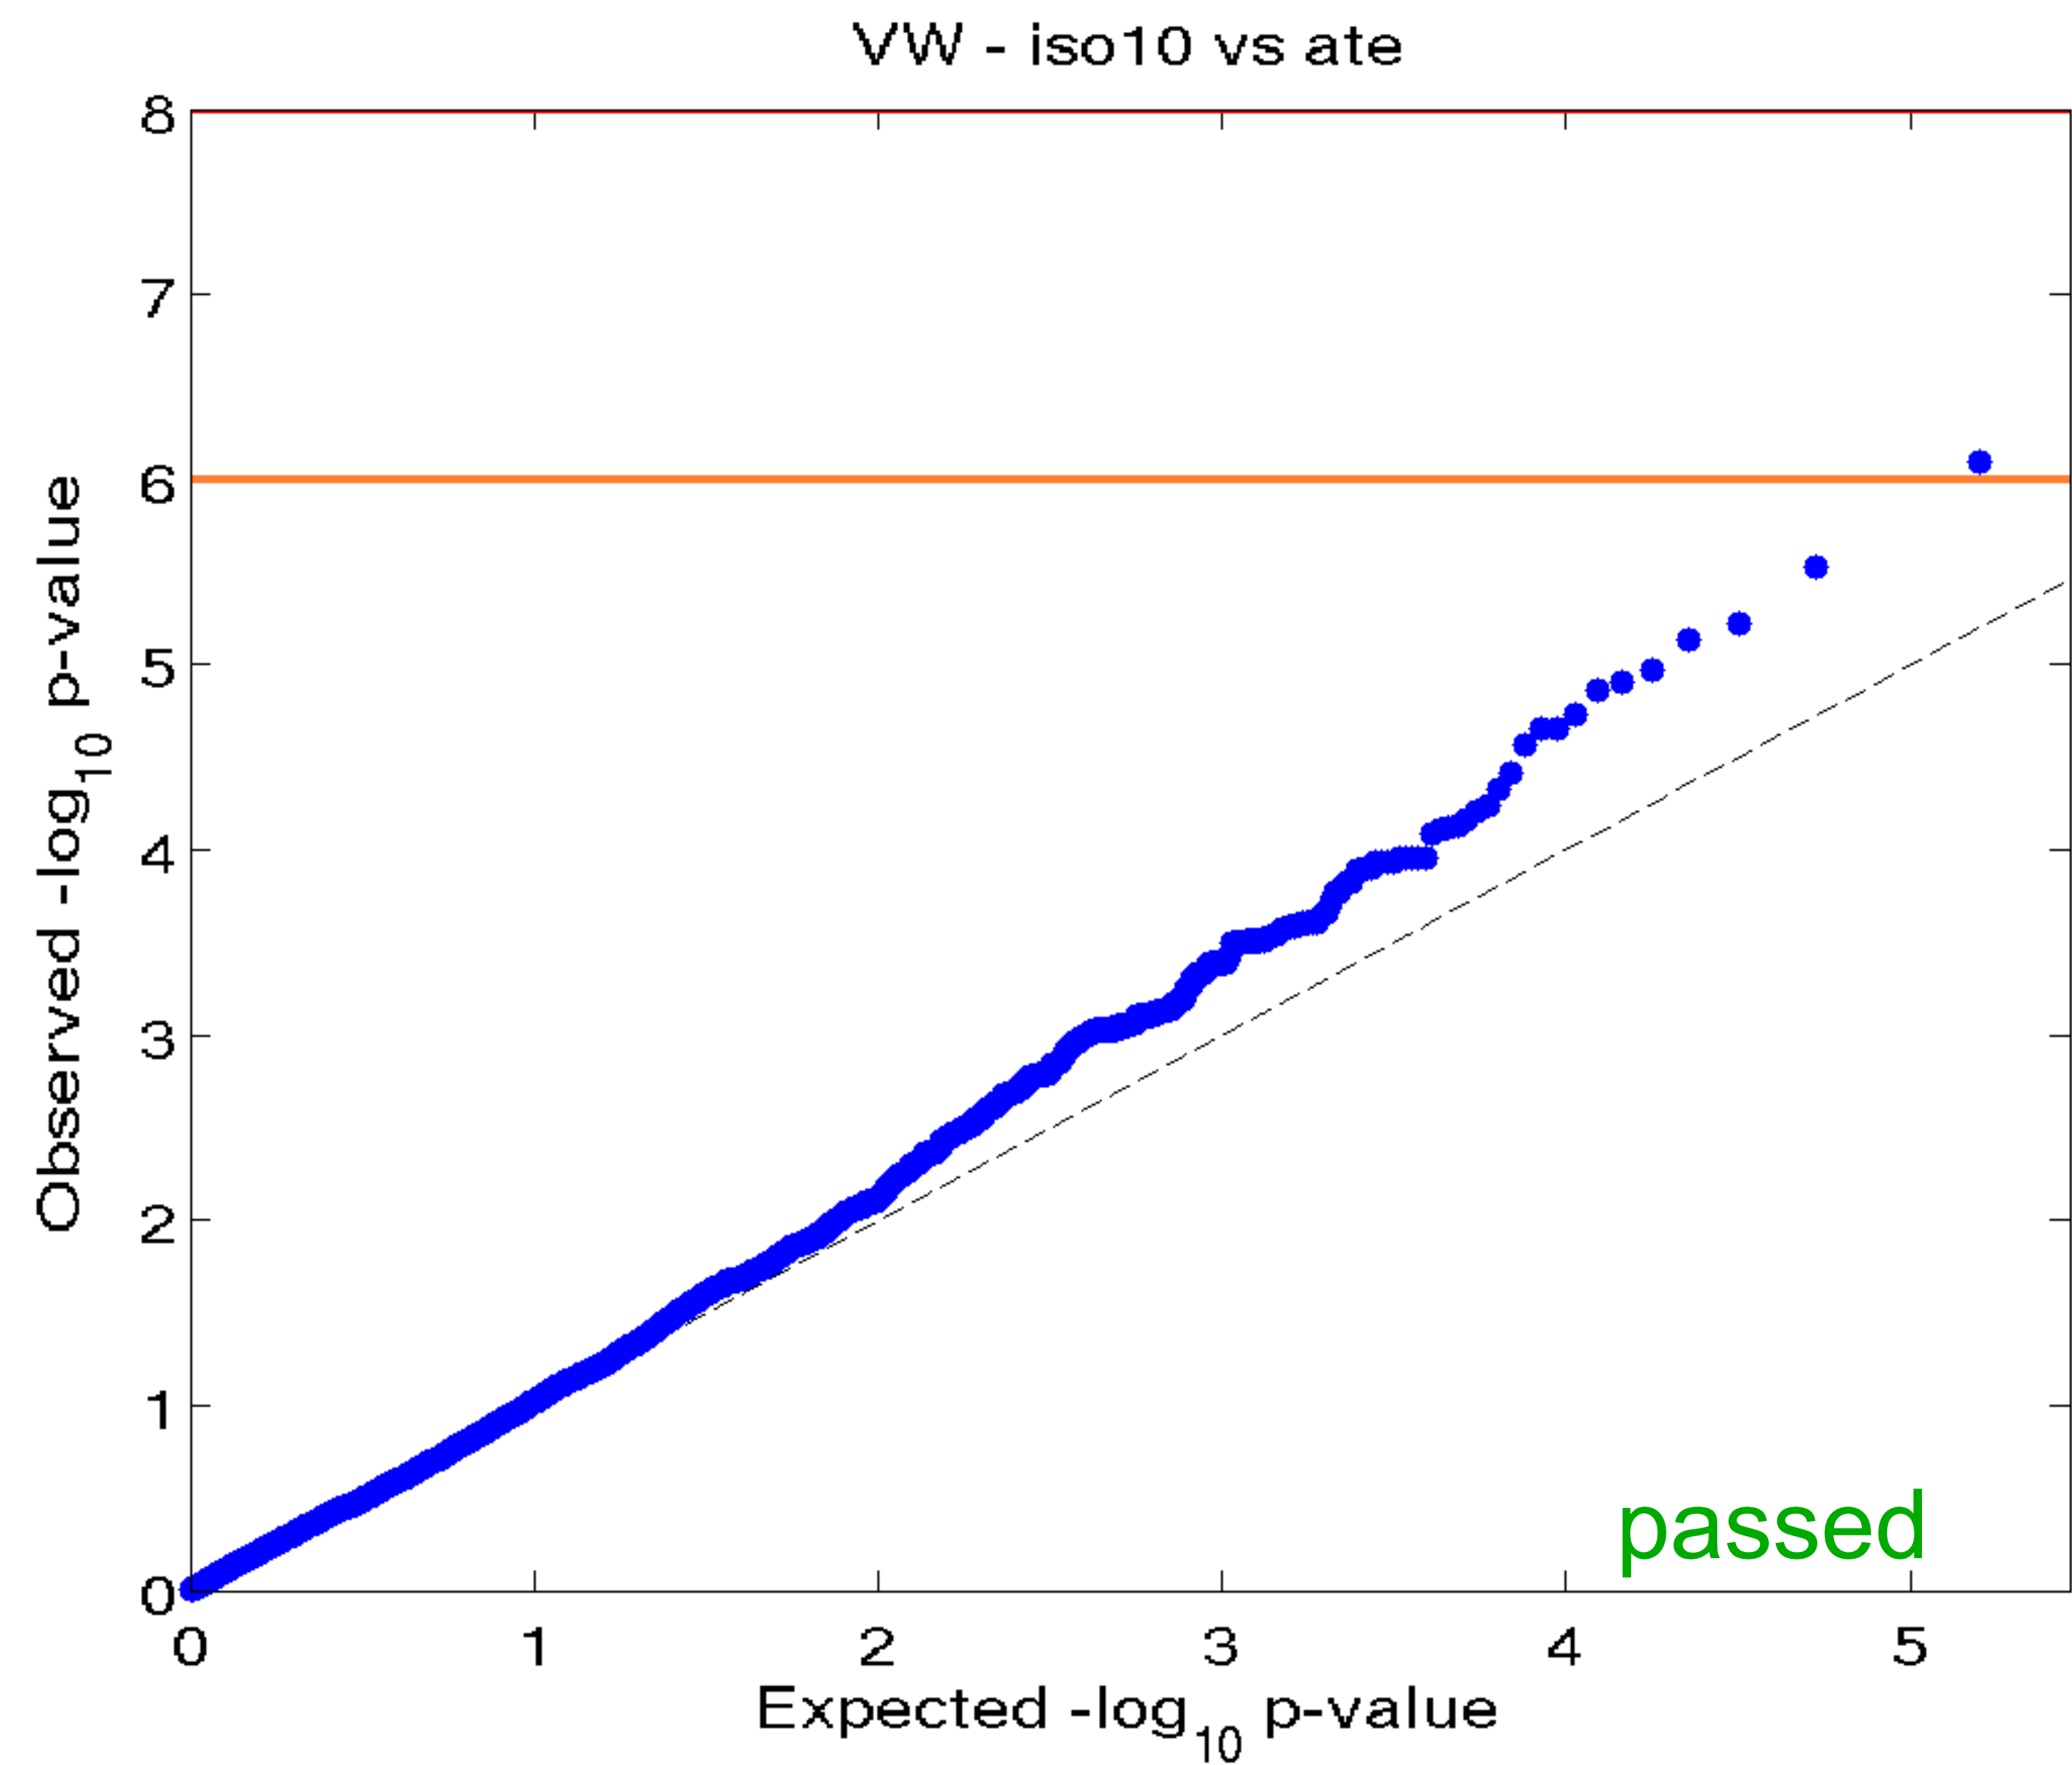

Supplement: S7 (10.1371/journal.pone.0041032.s007) [file journal.pone.0041032.s007]
