# Supplementary material for: Mapping Genetic Variants Associated with Beta-Adrenergic Responses in Inbred Mice
Source: PLOS journal article supplement (doi:10.1371/journal.pone.0041032), 2012-07-31

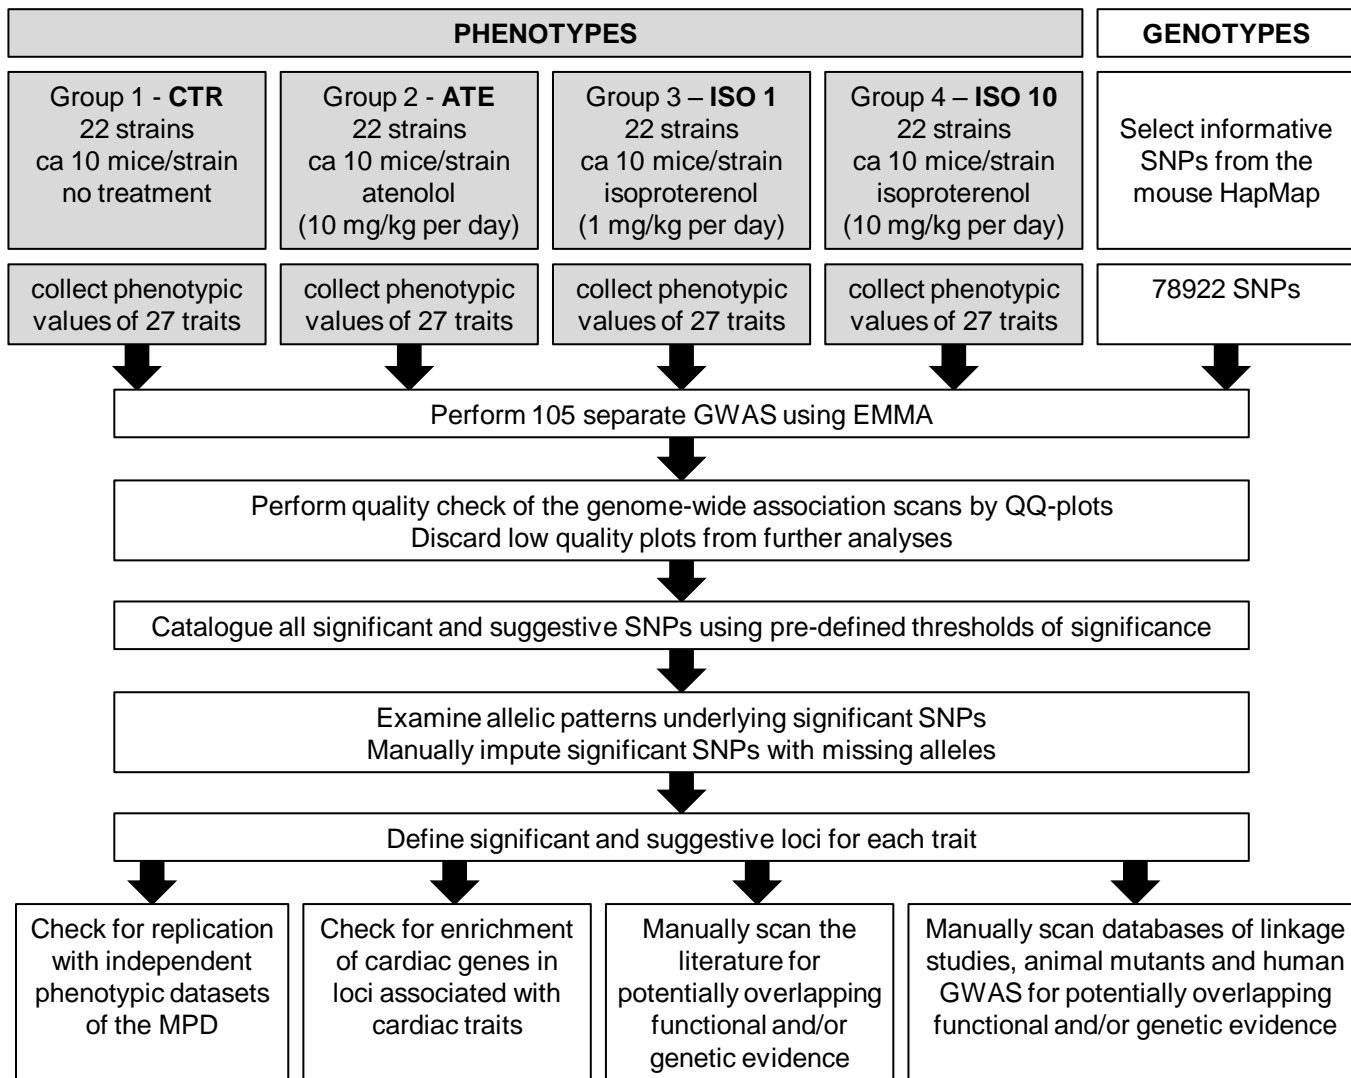

Supplement: S11 (10.1371/journal.pone.0041032.s011) [file journal.pone.0041032.s011]
