# Supplementary material for: Mapping Genetic Variants Associated with Beta-Adrenergic Responses in Inbred Mice
Source: PLoS One. 2012 Jul 31;7(7):e41032. doi: 10.1371/journal.pone.0041032 (PMC3409184; doi:10.1371/journal.pone.0041032)
Supplement: Table S2 — Heritabilities ( h2 ) for 27 traits and trait responsiveness to ate and iso , as computed by EMMA. The values of the genetic variance components for the various traits and responses were computed by fitting EMMA without any SNP but just using the kinship matrix [20]. On average, the heritabilities for the effects of iso10 or iso10 vs ate were ca 10 to15% lower than those of the measured traits, indicating that a significant fraction of trait responsiveness to these treatments was genetically determined. In contrast, the values for the effects of ate were lower (typically h2<0.5), consistent with our previous observation that the phenotypic changes induced by β-blockade were moderate for most phenotypes [9]. NA: not applicable; ND: not done. (XLS) [file pone.0041032.s013.xls]

## Sheet: Feuil1
Table S2: Heritabilities, as computed by EMMA
	ctr	ate	iso1	iso10	ate vs ctr	iso10 vs ctr	iso10 vs ate	ate vs iso10
HR (TC)	0.861604	0.803026	0.873126	0.873592	0.767148	0.933826	0.908243	0.826494
SBP	0.817846	0.802867	0.819026	0.76665	0.154291	0.414275	0.41494	0.370114
BWS	0.947485	NA	NA	NA	NA	NA	NA	NA
BWE	0.916573	0.958683	0.955271	0.942513	ND	ND	ND	ND
BWE/BWS	0.537026	0.80708	0.605829	0.754911	ND	ND	ND	ND
HR (ECG)	0.718494	0.750277	0.616707	0.704592	0.437068	0.736243	0.807722	0.732273
Pamp	0.86326	0.800956	0.821348	0.689086	0.225539	0.493406	0.439173	0.346925
Parea	0.856587	0.764309	0.833459	0.659194	0.358992	0.295463	0.413947	0.417645
Pdur	0.532765	0.66508	0.726006	0.529235	0.57064	0.366234	0.479265	0.648787
PR	0.763503	0.784613	0.671758	0.666277	0.161522	0.611438	0.596628	0.663986
RR	0.730901	0.760257	0.583149	0.671004	0.447959	0.754691	0.805785	0.744793
Qamp	0.728306	0.687527	0.667989	0.649123	4.53979e-05	0.451693	0.625822	0.732673
QRS	0.653331	0.480419	0.390296	0.331326	0.364072	0.668023	0.587055	0.623755
QRSarea	0.766607	0.704043	0.663896	0.736974	0.257712	0.463928	0.493447	0.532025
QT	0.611461	0.443882	0.547941	0.507548	0.398417	0.416478	0.479695	0.663188
QTc	0.715077	0.638502	0.541985	0.595383	0.670952	0.427697	0.522982	0.777257
Ramp	0.805737	0.733468	0.686678	0.713607	0.262272	0.643122	0.566814	0.664251
Samp	0.727311	0.637471	0.6819	0.708219	0.31858	0.305768	0.499248	0.557091
ST	0.589616	0.419002	0.5522	0.539167	0.417899	0.516152	0.629718	0.732356
HW	0.939845	0.952895	0.948112	0.936092	0.294034	0.725362	0.711667	0.772373
VW	0.941314	0.953163	0.950365	0.937817	0.283015	0.72672	0.708346	0.768977
VWI	0.916896	0.917984	0.903671	0.909981	0.440974	0.720566	0.636089	0.795772
VW/BWS	0.915591	0.927733	0.883037	0.875188	0.570243	0.708736	0.756663	0.871996
AW	0.851642	0.902682	0.875955	0.861775	0.424128	0.653161	0.67895	0.713112
AWI	0.791527	0.791177	0.768907	0.730633	0.308766	0.5273	0.521697	0.606663
AW/BWS	0.754652	0.825151	0.728787	0.74517	0.565379	0.621838	0.662919	0.768237
VW/AW	0.739875	0.791218	0.790288	0.787819	0.573813	0.486849	0.611369	0.668838
