# Supplementary material for: Mapping Genetic Variants Associated with Beta-Adrenergic Responses in Inbred Mice
Source: PLoS One. 2012 Jul 31;7(7):e41032. doi: 10.1371/journal.pone.0041032 (PMC3409184; doi:10.1371/journal.pone.0041032)
Supplement: Table S4 — Suggestive and significant hits mapped for the effects of the treatments. For each SNP, the association scores are given as the negative logarithm of the p-values calculated in EMMA across 201 genome-wide scans (columns L to HD). The data are ranked by position, from chr 1 to chr 19 (rows 4 to 217). (XLS) [file pone.0041032.s015.xls]

## Sheet: all loci simulated drug effects
Table S4
											AW	AW	AW	AW	AW	AW	AW	AW	VW	VW	VW	VW	VW	VW	VW	VW	HW	HW	HW	HW	HW	HW	HW	HW	BWS	BWE	BWE	BWE	BWE	BWE	BWE	BWE	BWE	AWI	AWI	AWI	AWI	AWI	AWI
Locus	Significance	Trait	EMMA scan	Phenotypic variance	Chr	rs	Position	Allele A	Allele B	Gene annotation	Ate	Ctr	Iso1	Iso10	Ate vs Ctr	Iso10 vs Ctr	Iso10 vs Ate	Ate vs Iso10	Ate	Ctr	Iso1	Iso10	Ate vs Ctr	Iso10 vs Ctr	Iso10 vs Ate	Ate vs Iso10	Ate	Ctr	Iso1	Iso10	Ate vs Ctr	Iso10 vs Ctr	Iso10 vs Ate	Ate vs Iso10	all	Ate	Ctr	Iso1	Iso10	Ate vs Ctr	Iso10 vs Ctr	Iso10 vs Ate	Ate vs Iso10	Ate	Ctr	Iso1	Iso10	Ate vs Ctr	Iso10 vs Ctr
AE1	SIGNIF	AWI	iso10 vs ctr	<2	1	rs3681732	34187903	8	12	Dst:I	0.442842	0.559373	0.393993	0.112671	0.126357	2.76367	1.65162	1.8395	0.22698	0.185281	0.118823	0.052212	0.256234	0.86752	1.43875	1.1643	0.243505	0.205764	0.138909	0.057089	0.230345	0.992512	1.53392	1.264	0.341571	0.252216	0.381065	0.272197	0.366904	0.178657	0.02506	0.190826	0.191598	1.98976	2.46289	1.49378	0.216202	0.696139	11.4779
AE12	sugg	ECG_QTc	iso10 vs ate	>2	1	rs6401503	35604987	5	15	=	0.150333	0.053153	0.098055	0.286917	0.084763	0.369592	0.176369	0.196172	0.059588	0.128807	0.325367	0.242197	0.324749	0.221697	0.48292	0.429159	0.06457	0.124476	0.328765	0.249813	0.271794	0.241293	0.462254	0.420214	1.2648	0.953873	1.20563	1.1673	1.14882	0.095152	0.045746	0.022174	0.034892	0.95929	1.05457	1.39586	0.580701	0.260689	0.687667
AE13	sugg	SBP	ate vs iso10	<2	1	rs13475829	41346976	10	10	LOC100041441:I	0.597479	0.578147	0.954193	0.877032	0.003381	0.171252	0.139124	0.132869	0.548628	0.794874	0.847063	0.759574	0.230078	0.010434	0.182556	0.139001	0.557203	0.792628	0.890536	0.785621	0.224686	0.005296	0.196518	0.154257	0.39642	0.153346	0.414872	0.396191	0.181814	0.476187	0.46407	0.066053	0.100648	0.69496	0.403073	0.575208	1.11557	0.396733	0.871555
AE14	sugg	VW/AW	iso10 vs ate; ate vs iso10	<2	1	rs32731994	178911859	11	11	Sdccag8:I	0.119942	0.33264	0.485258	1.12931	2.09053	0.849559	4.55676	4.29085	0.144546	0.365753	0.340324	0.442168	0.975283	0.063235	0.637953	0.448752	0.125688	0.370859	0.361121	0.489531	1.21798	0.110518	0.844153	0.616724	0.46864	0.102008	0.43099	0.516766	0.608431	0.945516	0.293722	1.2638	1.18689	0.304113	0.118838	0.13789	0.772016	1.33225	0.833408
AE14	sugg	VW/AW	iso10 vs ate; ate vs iso10	<2	1	rs13476258	178912739	10	10	Sdccag8:I	0.011511	0.569149	0.604105	1.2296	2.25728	0.580009	3.83674	3.56465	0.249605	0.576463	0.454551	0.500492	1.28535	0.07798	0.467947	0.299913	0.231115	0.587572	0.475273	0.551284	1.55262	0.034196	0.644229	0.440827	0.589365	0.165863	0.609822	0.575903	0.694865	1.15834	0.165969	1.12199	1.0468	0.184462	0.224617	0.181577	0.761761	1.28772	0.604396
AE14	sugg	VW/AW	iso10 vs ate; ate vs iso10	<2	1	rs32349548	178918165	11	11	Sdccag8:I	0.119942	0.33264	0.485258	1.12931	2.09053	0.849559	4.55676	4.29085	0.144546	0.365753	0.340324	0.442168	0.975283	0.063235	0.637953	0.448752	0.125688	0.370859	0.361121	0.489531	1.21798	0.110518	0.844153	0.616724	0.46864	0.102008	0.43099	0.516766	0.608431	0.945516	0.293722	1.2638	1.18689	0.304113	0.118838	0.13789	0.772016	1.33225	0.833408
AE15	sugg	ECG_QRSarea	iso10 vs ctr	>2	3	rs13477072	40358478	13	7	=	0.140848	0.474741	0.262228	0.207988	0.849162	0.333217	0.134723	0.094942	0.10453	0.167664	0.251149	0.185381	0.245135	0.034366	0.076752	0.124733	0.091444	0.126972	0.220377	0.156035	0.122927	0.017223	0.041666	0.090034	0.446612	0.376632	0.400549	0.46675	0.59041	0.069509	0.232328	0.130373	0.158824	1.15697	2.32391	1.77071	2.00433	1.04746	0.239426
AE2	SIGNIF	AWI	iso10 vs ctr	<2	3	rs29786343	109603656	10	12	Ntng1:I	1.06062	1.45404	0.995712	0.389264	0.369648	2.04797	0.894197	0.993669	1.47073	1.40548	1.2275	0.723877	0.25026	1.15721	1.93611	1.62748	1.47754	1.4251	1.27056	0.71142	0.199341	1.26981	1.93496	1.65322	0.473803	0.479682	0.436839	0.576361	0.547381	0.226143	0.054017	0.152004	0.154542	0.959641	1.69693	0.484897	0.069661	1.48699	8.36027
AE2	SIGNIF	AWI	iso10 vs ctr	<2	3	rs29793116	109621642	12	10	Ntng1:I	1.06062	1.43638	0.995712	0.389264	0.369648	2.04797	0.894197	0.998909	1.47073	1.40548	1.2275	0.723877	0.25026	1.15721	1.93611	1.62748	1.47754	1.4251	1.27056	0.71142	0.199341	1.26981	1.93496	1.65322	0.473803	0.479682	0.436839	0.576361	0.547381	0.226143	0.054017	0.152004	0.154542	0.959641	1.69693	0.484897	0.069661	1.48699	8.36027
AE2	SIGNIF	AWI	iso10 vs ctr	<2	3	rs29790771	109624994	12	10	Ntng1:I	1.06062	1.43638	0.995712	0.389264	0.369648	2.04797	0.894197	0.998909	1.47073	1.40548	1.2275	0.723877	0.25026	1.15721	1.93611	1.62748	1.47754	1.4251	1.27056	0.71142	0.199341	1.26981	1.93496	1.65322	0.473803	0.479682	0.436839	0.576361	0.547381	0.226143	0.054017	0.152004	0.154542	0.959641	1.69693	0.484897	0.069661	1.48699	8.36027
AE2	SIGNIF	AWI	iso10 vs ctr	<2	3	rs29794219	109660018	10	12	Ntng1:I	1.06062	1.45404	0.995712	0.389264	0.369648	2.04797	0.894197	0.993669	1.47073	1.40548	1.2275	0.723877	0.25026	1.15721	1.93611	1.62748	1.47754	1.4251	1.27056	0.71142	0.199341	1.26981	1.93496	1.65322	0.473803	0.479682	0.436839	0.576361	0.547381	0.226143	0.054017	0.152004	0.154542	0.959641	1.69693	0.484897	0.069661	1.48699	8.36027
AE2	SIGNIF	AWI	iso10 vs ctr	<2	3	rs29796127	109664536	10	12	Ntng1:I	1.06062	1.45404	0.995712	0.389264	0.369648	2.04797	0.894197	0.993669	1.47073	1.40548	1.2275	0.723877	0.25026	1.15721	1.93611	1.62748	1.47754	1.4251	1.27056	0.71142	0.199341	1.26981	1.93496	1.65322	0.473803	0.479682	0.436839	0.576361	0.547381	0.226143	0.054017	0.152004	0.154542	0.959641	1.69693	0.484897	0.069661	1.48699	8.36027
AE2	SIGNIF	AWI	iso10 vs ctr	<2	3	rs29800797	109728253	10	12	Ntng1:I	1.06062	1.45404	0.995712	0.389264	0.369648	2.04797	0.894197	0.993669	1.47073	1.40548	1.2275	0.723877	0.25026	1.15721	1.93611	1.62748	1.47754	1.4251	1.27056	0.71142	0.199341	1.26981	1.93496	1.65322	0.473803	0.479682	0.436839	0.576361	0.547381	0.226143	0.054017	0.152004	0.154542	0.959641	1.69693	0.484897	0.069661	1.48699	8.36027
AE2	SIGNIF	AWI	iso10 vs ctr	<2	3	rs29799814	109751955	12	10	Ntng1:I	1.06062	1.43638	0.995712	0.389264	0.369648	2.04797	0.894197	0.998909	1.47073	1.40548	1.2275	0.723877	0.25026	1.15721	1.93611	1.62748	1.47754	1.4251	1.27056	0.71142	0.199341	1.26981	1.93496	1.65322	0.473803	0.479682	0.436839	0.576361	0.547381	0.226143	0.054017	0.152004	0.154542	0.959641	1.69693	0.484897	0.069661	1.48699	8.36027
AE2	SIGNIF	AWI	iso10 vs ctr	<2	3	rs29805377	109756349	10	12	Ntng1:I	1.06062	1.45404	0.995712	0.389264	0.369648	2.04797	0.894197	0.993669	1.47073	1.40548	1.2275	0.723877	0.25026	1.15721	1.93611	1.62748	1.47754	1.4251	1.27056	0.71142	0.199341	1.26981	1.93496	1.65322	0.473803	0.479682	0.436839	0.576361	0.547381	0.226143	0.054017	0.152004	0.154542	0.959641	1.69693	0.484897	0.069661	1.48699	8.36027
AE16	sugg	SBP	ate vs iso10	<2	3	rs31050841	156064044	8	12	=	0.08729	0.19402	0.406522	0.46429	0.091206	0.310071	0.494958	0.463648	0.397313	0.718384	0.53041	0.512012	0.380787	0.176147	0.109262	0.069226	0.375391	0.680691	0.531983	0.519022	0.385907	0.136193	0.148806	0.104918	0.145386	0.014507	0.2007	0.146906	0.138739	0.515293	0.06084	0.276683	0.228021	0.204484	0.146223	0.468607	0.537796	0.304085	0.637482
AE17	sugg	HW; VW	ate vs ctr	<2	4	rs31782320	118373471	6	14	=	0.841613	0.085816	0.301128	0.147302	4.31043	0.084764	1.59777	1.6029	0.269417	0.083439	0.076682	0.077105	6.13997	0.369505	0.829228	0.673106	0.300669	0.074935	0.091431	0.082348	7.02794	0.361876	0.916525	0.752698	0.064699	0.408693	0.003992	0.211094	0.35746	3.32186	1.06581	0.314206	0.319508	0.450703	0.133499	0.016554	0.149951	0.867104	0.555313
AE17	sugg	HW	ate vs ctr	<2	4	rs6365760	118853712	6	14	Ermap:I	0.970529	0.176601	0.657969	0.333478	4.51142	0.225298	0.889391	0.946612	0.286522	0.004727	0.225611	0.1524	5.09258	0.342922	0.551478	0.457717	0.325336	0.003158	0.258855	0.166506	6.26623	0.360797	0.604507	0.512563	0.285277	0.472206	0.106996	0.398765	0.597887	2.48445	1.36897	0.060369	0.064051	0.526237	0.139711	0.187813	0.078137	1.02343	0.355543
AE18	sugg	SBP	iso10 vs ate; ate vs iso10	<2	4	rs32673583	144918696	13	9	=	0.230726	0.153913	0.142164	0.135611	0.117712	0.045933	0.166821	0.176996	0.682288	0.755494	0.519669	0.54302	0.001232	0.334003	0.331257	0.322503	0.655047	0.708211	0.497642	0.517161	0.000699	0.326368	0.321055	0.315785	0.497126	0.732376	0.633116	0.629405	0.555217	0.32078	0.081987	0.420726	0.458019	0.278097	0.182874	0.364404	0.280296	0.047421	0.05598
AE18	sugg	SBP	iso10 vs ate; ate vs iso10	<2	4	rs13478035	144926718	13	9	=	0.230726	0.153913	0.142164	0.135611	0.117712	0.045933	0.166821	0.176996	0.682288	0.755494	0.519669	0.54302	0.001232	0.334003	0.331257	0.322503	0.655047	0.708211	0.497642	0.517161	0.000699	0.326368	0.321055	0.315785	0.497126	0.732376	0.633116	0.629405	0.555217	0.32078	0.081987	0.420726	0.458019	0.278097	0.182874	0.364404	0.280296	0.047421	0.05598
AE18	sugg	SBP	iso10 vs ate; ate vs iso10	<2	4	rs32743080	144930671	9	13	=	0.230726	0.153913	0.142164	0.135594	0.117712	0.045933	0.166821	0.176996	0.682288	0.796123	0.519669	0.54302	0.001232	0.334003	0.331257	0.322503	0.655047	0.750932	0.497642	0.517161	0.000699	0.326368	0.321055	0.315785	0.510842	0.732376	0.633116	0.629405	0.541566	0.32078	0.081055	0.414582	0.458019	0.278097	0.182256	0.364404	0.279279	0.047421	0.05598
AE19	sugg	SBP	iso10 vs ate	<2	4	rs32745884	150513806	15	7	Camta1:I	0.42917	0.318793	0.346551	1.03199	0.231281	1.06443	0.643661	0.602302	0.347139	0.303252	0.301853	0.457283	0.334612	0.238157	0.071608	0.045322	0.355753	0.30956	0.313973	0.499283	0.321596	0.29352	0.118519	0.084964	0.777926	1.06851	0.907561	0.99252	1.32262	0.375598	0.501541	0.054304	0.044856	0.236955	0.221398	0.309763	0.197636	0.053	1.08214
AE19	sugg	SBP	iso10 vs ate	<2	4	rs3665544	150547850	7	15	Camta1:I	0.42917	0.318793	0.345831	1.03199	0.231281	1.06443	0.643661	0.596809	0.342679	0.301873	0.301853	0.457283	0.334478	0.238157	0.071608	0.045322	0.35095	0.308074	0.323441	0.499283	0.321526	0.29352	0.118519	0.084964	0.777926	1.06851	0.907561	0.99252	1.32262	0.375598	0.501541	0.054304	0.044856	0.236955	0.238965	0.309763	0.197636	0.053	1.08214
AE20	sugg	HR_TC	iso10 vs ctr	>2	5	rs33752594	51447279	10	12	=	1.14273	0.428824	0.274921	0.189533	1.52582	0.40244	2.03741	2.11078	1.2483	0.982761	0.964105	1.01888	0.919131	0.050438	0.50952	0.416053	1.26999	0.946524	0.947946	0.955848	1.1126	0.078481	0.63694	0.526575	0.769166	1.16252	0.836972	0.804408	0.667442	1.06097	0.196575	1.27082	1.28762	0.177441	0.010804	0.457512	0.379136	0.498161	0.361596
AE20	sugg	HR_TC	iso10 vs ctr	>2	5	rs29563894	51489749	12	8	=	0.685241	0.338456	0.196298	0.116048	1.05963	0.460479	1.33876	1.37307	1.11913	0.857767	0.871658	0.990861	0.929332	0.044446	0.353679	0.263127	1.1109	0.819168	0.851521	0.918013	1.03164	0.010105	0.443475	0.339995	0.596397	0.849525	0.545706	0.636121	0.505308	1.13316	0.049998	0.917094	0.935851	0.023726	0.042446	0.412469	0.37471	0.058754	0.674269
AE3	sugg	ECG_QTc	iso10 vs ate	>2	5	rs33114723	63633898	8	14	=	0.347513	0.013268	0.062656	0.272685	1.18907	0.410348	1.63593	1.72212	0.044356	0.078601	0.298215	0.242289	0.791812	0.329096	1.10951	0.99337	0.06117	0.072371	0.297839	0.249165	0.899473	0.34748	1.20573	1.09601	0.433155	0.045554	0.35998	0.460427	0.342423	1.00645	0.017745	0.727546	0.747028	0.906033	0.373404	0.496363	0.04193	0.516579	0.609289
AE3	SIGNIF	ECG_QTc	iso10 vs ate	>2	5	rs33738793	63928089	6	15	=	0.053199	0.025194	0.230299	0.518047	0.321869	0.740635	1.11487	1.16901	0.021615	0.057838	0.351575	0.265476	0.490198	0.447545	1.03204	0.919528	0.024645	0.055726	0.36307	0.285737	0.489385	0.491168	1.0877	0.985637	0.574875	0.156987	0.484476	0.639459	0.464713	0.75029	0.021194	0.526701	0.543428	0.448708	0.459749	0.388633	0.115796	0.08386	1.27965
AE3	SIGNIF	ECG_QTc	iso10 vs ate	>2	5	rs29510525	64902978	13	9	=	0.074382	0.139072	0.129842	0.32064	0.391909	0.193305	0.429902	0.429973	0.05788	0.165727	0.313717	0.290544	0.528367	0.183285	0.599917	0.559222	0.057561	0.169206	0.319043	0.297724	0.573494	0.175476	0.600381	0.569838	0.476864	0.246972	0.534334	0.436727	0.264457	0.700945	0.451268	0.019464	0.020615	0.164014	0.16898	0.25505	0.13036	0.191022	0.904716
AE21	sugg	ECG_QTc	iso10 vs ate	>2	5	rs29822290	73776591	9	12	=	0.021413	0.12323	0.007325	0.060532	0.582563	0.128804	0.15336	0.16086	0.096148	0.075639	0.061436	0.114054	0.259325	0.571523	0.934119	0.822742	0.094779	0.063156	0.066204	0.111806	0.3171	0.499326	0.875492	0.789702	0.08466	0.024888	0.115615	0.078491	0.007906	0.590666	0.313833	0.088909	0.101759	0.059108	0.071279	0.113922	0.053132	0.155872	0.025308
AE22	sugg	SBP	ate vs iso10	<2	5	rs32015082	104167784	9	12	=	0.727056	0.419427	0.881919	0.303901	0.415222	0.183687	0.555892	0.574864	0.509556	0.608387	0.649748	0.333974	0.001195	0.442108	0.419131	0.399014	0.52625	0.601354	0.694439	0.337799	0.027318	0.428744	0.431787	0.41394	0.446844	0.428666	0.419572	0.499524	0.45884	0.091843	0.004569	0.127699	0.143938	0.533317	0.264518	0.45981	0.018417	0.539851	0.199725
AE22	sugg	SBP	ate vs iso10	<2	5	rs13478432	104171099	9	13	=	0.670036	0.406663	0.819149	0.295868	0.331188	0.176857	0.491777	0.504716	0.596915	0.72874	0.780884	0.385612	0.059798	0.564235	0.503451	0.472309	0.60894	0.715585	0.787419	0.386473	0.033942	0.544965	0.508285	0.481838	0.550892	0.529536	0.521997	0.607184	0.561785	0.109166	0.00524	0.14673	0.162607	0.286018	0.148949	0.244096	0.065158	0.360238	0.192374
AE22	sugg	SBP	ate vs iso10	<2	5	rs29677471	104180429	9	13	=	0.670036	0.406663	0.819149	0.295868	0.331188	0.176857	0.491777	0.504716	0.596915	0.72874	0.780884	0.385612	0.059798	0.564235	0.503451	0.472309	0.60894	0.715585	0.787419	0.386473	0.033942	0.544965	0.508285	0.481838	0.550892	0.529536	0.521997	0.607184	0.561785	0.109166	0.00524	0.14673	0.162607	0.286018	0.148949	0.244096	0.065158	0.360238	0.192374
AE22	sugg	SBP	ate vs iso10	<2	5	rs33537503	104190851	9	13	Aff1:I	0.670036	0.406663	0.819149	0.295868	0.331188	0.176857	0.491777	0.504716	0.596915	0.72874	0.780884	0.385612	0.059798	0.564235	0.503451	0.472309	0.60894	0.715585	0.787419	0.386473	0.033942	0.544965	0.508285	0.481838	0.550892	0.529536	0.521997	0.607184	0.561785	0.109166	0.00524	0.14673	0.162607	0.286018	0.148949	0.244096	0.065158	0.360238	0.192374
AE22	sugg	SBP	ate vs iso10	<2	5	rs33444119	104192493	9	13	Aff1:I	0.670036	0.406663	0.819149	0.295868	0.331188	0.176857	0.491777	0.504716	0.596915	0.72874	0.780884	0.385612	0.059798	0.564235	0.503451	0.472309	0.60894	0.715585	0.787419	0.386473	0.033942	0.544965	0.508285	0.481838	0.550892	0.529536	0.521997	0.607184	0.561785	0.109166	0.00524	0.14673	0.162607	0.286018	0.148949	0.244096	0.065158	0.360238	0.192374
AE22	sugg	SBP	ate vs iso10	<2	5	rs29777435	104358888	9	13	=	0.670036	0.406663	0.819149	0.295868	0.331188	0.176857	0.491777	0.504716	0.596915	0.72874	0.780884	0.385612	0.059798	0.564235	0.503451	0.472309	0.60894	0.715585	0.787419	0.386473	0.033942	0.544965	0.508285	0.481838	0.550892	0.529536	0.521997	0.607184	0.561785	0.109166	0.00524	0.14673	0.162607	0.286018	0.148949	0.244096	0.065158	0.360238	0.192374
AE23	sugg	SBP	ate vs iso10	<2	5	rs13478518	128264975	12	8	Tmem132d:Cs:V:816	0.18549	0.398383	0.403171	0.186319	0.521611	0.42068	0.009391	0.041071	0.037578	0.124961	0.045638	0.031752	0.070686	0.233706	0.155922	0.118364	0.024037	0.095334	0.067469	0.042222	0.037227	0.188074	0.138267	0.104372	0.198506	0.047911	0.051944	0.170279	0.186956	0.356005	0.189365	0.613077	0.645634	0.392911	0.566932	0.310873	0.062328	0.333476	1.16415
AE24	sugg	SBP	iso10 vs ctr	>2	6	rs13478734	45837995	12	8	Cntnap2:I	0.004695	0.007798	0.04471	0.039149	0.003849	0.035769	0.013687	0.02485	0.143234	0.080584	0.07512	0.185273	0.180654	0.191132	0.044167	0.045486	0.132783	0.075615	0.069724	0.176648	0.148384	0.18503	0.054306	0.053893	0.289206	0.090106	0.233748	0.106628	0.151773	0.292415	0.145575	0.096764	0.104776	0.152374	0.265512	0.264637	0.307357	0.347863	0.055217
AE24	sugg	SBP	iso10 vs ctr	>2	6	rs13478738	46787419	12	8	Cntnap2:I	0.004695	0.007798	0.04471	0.039149	0.003849	0.035769	0.013687	0.02485	0.143234	0.080584	0.07512	0.185273	0.180654	0.191132	0.044167	0.045486	0.132783	0.075615	0.069724	0.176648	0.148384	0.18503	0.054306	0.053893	0.289206	0.090106	0.233748	0.106628	0.151773	0.292415	0.145575	0.096764	0.104776	0.152374	0.265512	0.264637	0.307357	0.347863	0.055217
AE25	sugg	HR_TC	iso10 vs ctr	>2	6	rs6181659	49730420	12	10	=	1.32883	0.628469	0.422297	0.387577	1.12156	0.381639	1.53561	1.53711	2.05821	1.65222	1.71085	1.3694	1.12481	0.273109	1.12445	0.859818	2.05827	1.57346	1.67205	1.30209	1.27221	0.296168	1.24556	0.966239	1.22572	1.8627	1.2736	1.42762	1.13551	1.46221	0.108242	1.46373	1.43857	0.083957	0.021362	0.631189	0.311337	0.11269	0.425176
AE25	sugg	HR_TC	iso10 vs ctr	>2	6	rs3658388	49761482	10	12	=	1.32883	0.628469	0.422297	0.387577	1.1175	0.381639	1.53561	1.53711	2.05821	1.65773	1.71085	1.3694	1.12481	0.273109	1.12445	0.859818	2.05827	1.57873	1.67205	1.30209	1.27221	0.296168	1.24556	0.966239	1.22572	1.8627	1.2736	1.42762	1.13551	1.46221	0.108242	1.46373	1.43857	0.083957	0.021362	0.631189	0.311337	0.11269	0.425176
AE25	sugg	HR_TC	iso10 vs ctr	>2	6	rs30206468	49785873	10	12	=	1.32883	0.628469	0.422297	0.387577	1.1175	0.381639	1.53561	1.53711	2.05821	1.65773	1.71085	1.3694	1.12481	0.273109	1.12445	0.859818	2.05827	1.57873	1.67205	1.30209	1.27221	0.296168	1.24556	0.966239	1.22572	1.8627	1.2736	1.42762	1.13551	1.46221	0.108242	1.46373	1.43857	0.083957	0.021362	0.631189	0.311337	0.11269	0.425176
AE25	sugg	HR_TC	iso10 vs ctr	>2	6	rs4139698	49819544	10	12	=	1.32883	0.628469	0.422297	0.387577	1.1175	0.381639	1.53561	1.53711	2.05821	1.65773	1.71085	1.3694	1.12481	0.273109	1.12445	0.859818	2.05827	1.57873	1.67205	1.30209	1.27221	0.296168	1.24556	0.966239	1.22572	1.8627	1.2736	1.42762	1.13551	1.46221	0.108242	1.46373	1.43857	0.083957	0.021362	0.631189	0.311337	0.11269	0.425176
AE25	sugg	HR_TC	iso10 vs ctr	>2	6	rs30663358	49824956	10	12	=	1.32883	0.628469	0.422297	0.387577	1.1175	0.381639	1.53561	1.53711	2.05821	1.65773	1.71085	1.3694	1.12481	0.273109	1.12445	0.859818	2.05827	1.57873	1.67205	1.30209	1.27221	0.296168	1.24556	0.966239	1.22572	1.8627	1.2736	1.42762	1.13551	1.46221	0.108242	1.46373	1.43857	0.083957	0.021362	0.631189	0.311337	0.11269	0.425176
AE25	sugg	HR_TC	iso10 vs ctr	>2	6	rs30858404	49849685	12	10	=	1.32883	0.628469	0.422297	0.387577	1.12156	0.381639	1.53561	1.53711	2.05821	1.65222	1.71085	1.3694	1.12481	0.273109	1.12445	0.859818	2.05827	1.57346	1.67205	1.30209	1.27221	0.296168	1.24556	0.966239	1.22572	1.8627	1.2736	1.42762	1.13551	1.46221	0.108242	1.46373	1.43857	0.083957	0.021362	0.631189	0.311337	0.11269	0.425176
AE25	sugg	HR_TC	iso10 vs ctr	>2	6	rs3662951	50179955	10	11	Dfna5h:I	1.33354	0.612226	0.411042	0.393139	1.11224	0.405653	1.56984	1.54988	2.11147	1.67294	1.82059	1.78631	1.08073	0.307007	1.20456	0.983294	2.11481	1.58941	1.80362	1.67694	1.22165	0.331872	1.33175	1.10295	1.17742	1.83161	1.24696	1.4482	1.20408	1.40305	0.13484	1.592	1.51051	0.07573	0.028479	0.643033	0.325447	0.114409	0.412322
AE25	sugg	HR_TC	iso10 vs ctr	>2	6	rs3664026	50180094	10	12	Dfna5h:I	1.32883	0.628469	0.422297	0.387577	1.1175	0.381639	1.53561	1.53711	2.05821	1.65773	1.71085	1.3694	1.12481	0.273109	1.12445	0.859818	2.05827	1.57873	1.67205	1.30209	1.27221	0.296168	1.24556	0.966239	1.22572	1.8627	1.2736	1.42762	1.13551	1.46221	0.108242	1.46373	1.43857	0.083957	0.021362	0.631189	0.311337	0.11269	0.425176
AE25	sugg	HR_TC	iso10 vs ctr	>2	6	rs6166746	50294630	10	12	Osbpl3:I	1.32883	0.628469	0.422297	0.387577	1.1175	0.381639	1.53561	1.53711	2.05821	1.65773	1.71085	1.3694	1.12481	0.273109	1.12445	0.859818	2.05827	1.57873	1.67205	1.30209	1.27221	0.296168	1.24556	0.966239	1.22572	1.8627	1.2736	1.42762	1.13551	1.46221	0.108242	1.46373	1.43857	0.083957	0.021362	0.631189	0.311337	0.11269	0.425176
AE25	sugg	HR_TC	iso10 vs ctr	>2	6	rs6302113	50314370	10	12	Osbpl3:I	1.32883	0.628469	0.422297	0.387577	1.1175	0.381639	1.53561	1.53711	2.05821	1.65773	1.71085	1.3694	1.12481	0.273109	1.12445	0.859818	2.05827	1.57873	1.67205	1.30209	1.27221	0.296168	1.24556	0.966239	1.22572	1.8627	1.2736	1.42762	1.13551	1.46221	0.108242	1.46373	1.43857	0.083957	0.021362	0.631189	0.311337	0.11269	0.425176
AE4	sugg	SBP	iso10 vs ate	<2	6	rs29950903	53371578	14	7	=	0.368313	0.599472	0.675907	0.671026	0.148508	0.033611	0.267852	0.252629	0.763122	0.778502	0.611684	0.533538	0.313422	0.256517	0.479392	0.436571	0.748336	0.778928	0.631964	0.553622	0.238335	0.232019	0.389794	0.365692	0.418969	0.50767	0.413584	0.526123	0.524614	0.323896	0.196965	0.09349	0.122025	0.071458	0.407153	0.265717	0.410369	0.626892	0.06634
AE4	SIGNIF	SBP	iso10 vs ate; ate vs iso10	<2	6	rs29955438	53382543	15	7	=	0.247741	0.468559	0.52293	0.589609	0.206364	0.088647	0.356072	0.33737	0.634845	0.637095	0.498511	0.486637	0.286968	0.156309	0.319388	0.304962	0.612807	0.635381	0.51072	0.503357	0.194855	0.136743	0.239336	0.237355	0.221563	0.354592	0.24371	0.33673	0.357989	0.345811	0.246326	0.069007	0.094562	0.059714	0.425461	0.315064	0.492344	0.69806	0.013958
AE4	SIGNIF	SBP	iso10 vs ate; ate vs iso10	<2	6	rs29956129	53439621	6	14	=	0.449254	0.238541	0.472487	0.586951	0.403965	0.307286	0.025233	0.017835	0.563008	0.537799	0.393065	0.390417	0.335415	0.204801	0.43046	0.400798	0.562952	0.525997	0.406656	0.413084	0.33208	0.16368	0.37332	0.356604	0.206655	0.519692	0.296925	0.373788	0.392111	0.596894	0.13349	0.337925	0.37433	0.110236	0.072341	0.161228	0.348757	0.080748	0.384587
AE4	SIGNIF	SBP	iso10 vs ate; ate vs iso10	<2	6	rs29911676	53444424	6	16	=	0.691838	0.446537	0.730861	0.850597	0.43823	0.381501	0.067429	0.051601	0.794405	0.76072	0.632897	0.618263	0.382765	0.13644	0.371908	0.365884	0.798731	0.750628	0.653548	0.646978	0.381824	0.097918	0.315262	0.31957	0.507962	0.767546	0.536881	0.640468	0.661059	0.600441	0.191479	0.276144	0.315102	0.201827	0.145462	0.221122	0.490842	0.113551	0.46238
AE4	SIGNIF	SBP	iso10 vs ate; ate vs iso10	<2	6	rs29973813	53586252	7	13	Creb5:I	0.430586	0.678858	0.772395	0.734325	0.19866	0.038864	0.263717	0.252366	0.828209	0.898018	0.78232	0.6231	0.209347	0.223111	0.362884	0.33387	0.811113	0.898469	0.811383	0.645742	0.133154	0.203873	0.285377	0.270353	0.366634	0.497098	0.410357	0.516817	0.45141	0.289008	0.124547	0.154378	0.183163	0.127166	0.488255	0.31938	0.54669	0.626538	0.00502
AE4	SIGNIF	SBP	iso10 vs ate; ate vs iso10	<2	6	rs30509876	54166499	8	12	=	0.84356	0.484077	0.671898	0.767762	0.372806	0.211009	0.077932	0.076124	1.1028	1.20297	1.08983	0.974018	0.138141	0.167838	0.273389	0.233357	1.09978	1.16432	1.09985	0.97913	0.148542	0.141546	0.251029	0.218184	0.732164	0.975794	0.821465	0.877447	0.658813	0.440946	0.123871	0.634778	0.673388	0.137434	0.008156	0.016317	0.357196	0.134432	0.591476
AE26	sugg	SBP	iso10 vs ctr	>2	7	rs3671145	126615379	16	4	Umod:I	0.830431	0.544406	1.1638	0.492213	0.284796	0.147779	0.431683	0.399175	0.605552	0.636227	0.799491	0.360315	0.082783	0.448871	0.635731	0.593688	0.627338	0.637583	0.850359	0.37661	0.111743	0.420857	0.615973	0.583493	0.779809	0.810683	0.658322	1.0721	0.718395	0.421649	0.068659	0.299877	0.312541	0.234604	0.179941	0.169601	0.041277	0.026297	0.242436
AE27	sugg	HW; VW	iso10 vs ate	>2	8	rs33265215	58880262	4	16	=	1.42778	0.806931	0.44576	0.07757	0.791121	1.71662	3.56365	3.72046	0.62482	0.420939	0.198085	0.06005	0.969131	1.94666	6.09933	6.76323	0.678762	0.444184	0.221035	0.050583	1.09021	1.98651	6.43632	7.24914	0.40346	1.54094	0.759283	0.605228	0.472437	1.90114	0.244321	3.02309	3.03368	0.306004	0.233735	0.103731	0.346549	0.164977	2.33946
AE28	sugg	SBP	iso10 vs ate	<2	9	rs29841985	57191802	5	16	=	0.048247	0.006269	0.09584	0.145617	0.078544	0.282175	0.413581	0.444244	0.016501	0.080606	0.013854	0.065429	0.261884	0.007953	0.181904	0.146065	0.01199	0.076717	0.011986	0.071639	0.275805	0.008469	0.211619	0.172439	0.080163	0.024275	0.075782	0.021615	0.06201	0.371213	0.409266	0.063963	0.089896	0.0027	0.11212	0.142191	0.388602	0.34878	1.24638
AE29	sugg	ECG_Pdur	ate vs ctr	>2	9	rs6355445	69810186	12	8	=	0.127724	0.244232	0.056105	0.150452	0.13152	0.128001	0.024941	0.018605	0.174105	0.307839	0.272561	0.17885	0.463514	0.246616	0.010519	0.011457	0.151532	0.269724	0.24777	0.154164	0.437831	0.236254	0.009805	0.012384	0.214841	0.147961	0.132221	0.144215	0.164829	0.148715	0.071089	0.003697	0.008357	0.029961	0.10786	0.139977	0.019116	0.585032	0.326932
AE5	SIGNIF	ECG_QRSarea	iso10 vs ctr	>2	9	rs29982455	90876770	10	12	=	0.107882	0.164831	0.002815	0.123937	0.244034	0.601291	0.375965	0.419776	0.151879	0.269364	0.392714	0.244232	0.300336	0.084904	0.093276	0.10116	0.137554	0.23483	0.364811	0.239804	0.210835	0.040559	0.107361	0.116171	0.450274	0.262578	0.549739	0.622918	0.768836	0.364588	0.23634	0.638939	0.639511	0.85641	1.294	1.06434	0.783864	0.682572	0.555609
AE5	SIGNIF	ECG_QRSarea	iso10 vs ctr	>2	9	rs29785225	90900032	10	12	=	0.107882	0.164831	0.002815	0.123937	0.244034	0.601291	0.375965	0.419776	0.151879	0.269364	0.392714	0.244232	0.300336	0.084904	0.093276	0.10116	0.137554	0.23483	0.364811	0.239804	0.210835	0.040559	0.107361	0.116171	0.450274	0.262578	0.549739	0.622918	0.768836	0.364588	0.23634	0.638939	0.639511	0.85641	1.294	1.06434	0.783864	0.682572	0.555609
AE5	SIGNIF	ECG_QRSarea	iso10 vs ctr	>2	9	rs29640201	92265347	8	13	=	0.150137	0.451284	0.516007	0.488331	0.688035	0.06613	0.343259	0.281586	0.090676	0.130844	0.145233	0.045825	0.13927	0.222285	0.161137	0.096633	0.077994	0.095781	0.108887	0.017963	0.048929	0.20815	0.199619	0.12903	0.162586	0.299213	0.312037	0.293546	0.394632	0.048644	0.03547	0.020809	0.003982	0.904486	1.64465	1.72748	2.00465	0.881787	0.064166
AE5	SIGNIF	ECG_QRSarea	iso10 vs ctr	>2	9	rs6180887	92268175	9	13	=	0.034678	0.268607	0.261552	0.176498	0.707449	0.133838	0.248425	0.204934	0.20497	0.234873	0.278187	0.19742	0.09446	0.122604	0.097375	0.052548	0.191684	0.196658	0.241387	0.169213	0.012972	0.109848	0.129861	0.080378	0.351098	0.443627	0.471483	0.467352	0.579033	0.057207	0.099837	0.027377	0.043104	0.867249	1.57588	1.76034	1.75343	0.891013	0.105016
AE5	SIGNIF	ECG_QRSarea	iso10 vs ctr	>2	9	rs33652870	92299695	13	9	=	0.034678	0.268607	0.261552	0.176498	0.70366	0.133838	0.248425	0.204934	0.20497	0.234873	0.278187	0.19742	0.09446	0.122604	0.097375	0.052548	0.191684	0.196658	0.241387	0.169213	0.012972	0.109848	0.129861	0.080378	0.351098	0.444678	0.471483	0.467352	0.579033	0.057207	0.099837	0.027377	0.043765	0.867249	1.57588	1.76034	1.75343	0.891013	0.105016
AE5	SIGNIF	ECG_QRSarea	iso10 vs ctr	>2	9	rs30172450	92314607	9	13	=	0.034678	0.268607	0.261552	0.176498	0.707449	0.133838	0.248425	0.204934	0.20497	0.234873	0.278187	0.19742	0.09446	0.122604	0.097375	0.052548	0.191684	0.196658	0.241387	0.169213	0.012972	0.109848	0.129861	0.080378	0.351098	0.443627	0.471483	0.467352	0.579033	0.057207	0.099837	0.027377	0.043104	0.867249	1.57588	1.76034	1.75343	0.891013	0.105016
AE5	SIGNIF	ECG_QRSarea	iso10 vs ctr	>2	9	rs30039991	92334240	8	13	=	0.150137	0.451284	0.516007	0.488331	0.688035	0.06613	0.343259	0.281586	0.090676	0.130844	0.145233	0.045825	0.13927	0.222285	0.161137	0.096633	0.077994	0.095781	0.108887	0.017963	0.048929	0.20815	0.199619	0.12903	0.162586	0.299213	0.312037	0.293546	0.394632	0.048644	0.03547	0.020809	0.003982	0.904486	1.64465	1.72748	2.00465	0.881787	0.064166
AE5	SIGNIF	ECG_QRSarea	iso10 vs ctr	>2	9	rs29982513	92340225	9	13	=	0.034678	0.268607	0.261552	0.176498	0.707449	0.133838	0.248425	0.204934	0.20497	0.234873	0.278187	0.19742	0.09446	0.122604	0.097375	0.052548	0.191684	0.196658	0.241387	0.169213	0.012972	0.109848	0.129861	0.080378	0.351098	0.443627	0.471483	0.467352	0.579033	0.057207	0.099837	0.027377	0.043104	0.867249	1.57588	1.76034	1.75343	0.891013	0.105016
AE6	SIGNIF	SBP	iso10 vs ate; ate vs iso10	<2	10	rs3680872	113842415	14	6	Trhde:I	0.146584	0.016472	0.136696	0.280059	0.399434	0.585308	0.160623	0.170006	0.469078	0.490273	0.320952	0.434119	0.185484	0.032832	0.134956	0.146695	0.450086	0.456781	0.312263	0.430417	0.195563	0.00271	0.103714	0.117709	0.437709	0.621341	0.434146	0.472765	0.522154	0.554787	0.168848	0.25102	0.287062	0.356998	0.315431	0.256802	0.040068	0.115158	0.765104
AE6	SIGNIF	SBP	iso10 vs ate; ate vs iso10	<2	10	rs3682318	113928333	7	14	Trhde:I	0.414019	0.241417	0.374245	0.418836	0.454376	0.227068	0.013187	0.020821	0.734233	0.904634	0.588978	0.585654	0.018887	0.332058	0.320336	0.32113	0.724027	0.861354	0.588386	0.584701	0.04777	0.284985	0.296759	0.302307	0.929691	0.998721	0.927786	0.837043	0.898801	0.352238	0.028351	0.291455	0.330931	0.189715	0.211892	0.194348	0.097927	0.240472	0.389378
AE6	SIGNIF	SBP	iso10 vs ate; ate vs iso10	<2	10	rs29352931	113956455	15	7	Trhde:I	0.293076	0.160138	0.268273	0.356379	0.363189	0.302289	0.0461	0.037109	0.613131	0.738046	0.481222	0.538205	0.000511	0.221407	0.194343	0.210732	0.596986	0.698127	0.475362	0.534684	0.016489	0.182911	0.168295	0.187472	0.574415	0.756444	0.633621	0.577994	0.658962	0.369123	0.063556	0.261422	0.298931	0.212553	0.203879	0.157003	0.05086	0.170577	0.48631
AE6	SIGNIF	SBP	iso10 vs ate; ate vs iso10	<2	10	rs29347876	113956476	14	7	Trhde:I	0.419175	0.241417	0.374723	0.418836	0.454376	0.227068	0.013187	0.021136	0.735082	0.904634	0.588978	0.585654	0.019037	0.332058	0.320336	0.32113	0.726618	0.861354	0.588386	0.584701	0.047913	0.284985	0.296759	0.302307	0.929691	0.998721	0.927786	0.830267	0.898801	0.352238	0.028351	0.291455	0.330931	0.192273	0.211892	0.194348	0.097927	0.240472	0.389378
AE6	SIGNIF	SBP	iso10 vs ate; ate vs iso10	<2	10	rs29319071	113956510	14	6	Trhde:I	0.324702	0.2172	0.250036	0.426749	0.253241	0.229067	0.038125	0.064032	1.08412	1.16135	0.750499	0.874994	0.184208	0.168593	0.209338	0.218016	1.02952	1.10153	0.704264	0.856477	0.16809	0.139308	0.178355	0.190926	0.593944	0.920843	0.725549	0.577558	0.619677	0.516048	0.008968	0.476534	0.519891	0.293008	0.186961	0.210932	0.011842	0.023548	0.415985
AE6	SIGNIF	SBP	iso10 vs ate; ate vs iso10	<2	10	rs6411237	113960150	7	15	Trhde:I	0.293076	0.160138	0.26769	0.356379	0.363189	0.302289	0.0461	0.037109	0.613131	0.750208	0.481222	0.538205	0.000511	0.221645	0.194568	0.210732	0.596986	0.710418	0.471643	0.534684	0.016489	0.183111	0.168531	0.187472	0.574415	0.756444	0.633621	0.577994	0.658962	0.369123	0.063556	0.261422	0.298931	0.212553	0.203879	0.157003	0.05086	0.170577	0.48631
AE6	SIGNIF	SBP	iso10 vs ate; ate vs iso10	<2	10	rs3690259	113993906	6	14	Trhde:I	0.146584	0.016412	0.136696	0.281089	0.399434	0.578247	0.160623	0.170006	0.469078	0.490273	0.320836	0.434119	0.185484	0.032832	0.134956	0.146695	0.450086	0.456781	0.312263	0.430417	0.195563	0.00271	0.103714	0.117709	0.437709	0.621341	0.431905	0.472765	0.520443	0.554787	0.169075	0.251861	0.287062	0.356998	0.315431	0.256802	0.040096	0.115158	0.752309
AE6	sugg	SBP	iso10 vs ate	<2	10	rs29328115	113995450	9	11	Trhde:I	0.034813	0.139673	0.095756	0.420527	0.330835	0.618918	1.1756	1.1638	0.222465	0.300845	0.243203	0.375687	0.051902	0.141836	0.229183	0.192071	0.204879	0.294929	0.2424	0.385983	0.102309	0.169846	0.299216	0.254104	0.681657	0.695247	0.719874	0.794478	0.973407	0.122582	0.434473	0.184896	0.177926	1.08394	0.358963	0.588899	0.148099	0.628201	0.385437
AE6	SIGNIF	SBP	iso10 vs ate; ate vs iso10	<2	10	rs29319861	114009587	15	7	Trhde:I	0.293076	0.160138	0.268273	0.356379	0.363189	0.302289	0.0461	0.037109	0.613131	0.738046	0.481222	0.538205	0.000511	0.221407	0.194343	0.210732	0.596986	0.698127	0.475362	0.534684	0.016489	0.182911	0.168295	0.187472	0.574415	0.756444	0.633621	0.577994	0.658962	0.369123	0.063556	0.261422	0.298931	0.212553	0.203879	0.157003	0.05086	0.170577	0.48631
AE6	SIGNIF	SBP	iso10 vs ate; ate vs iso10	<2	10	rs29354390	114022070	15	7	Trhde:I	0.293076	0.160138	0.268273	0.356379	0.363189	0.302289	0.0461	0.037109	0.613131	0.738046	0.481222	0.538205	0.000511	0.221407	0.194343	0.210732	0.596986	0.698127	0.475362	0.534684	0.016489	0.182911	0.168295	0.187472	0.574415	0.756444	0.633621	0.577994	0.658962	0.369123	0.063556	0.261422	0.298931	0.212553	0.203879	0.157003	0.05086	0.170577	0.48631
AE6	SIGNIF	SBP	iso10 vs ate; ate vs iso10	<2	10	rs29349190	114024166	14	7	Trhde:I	0.419175	0.241417	0.374723	0.418836	0.454376	0.227068	0.013187	0.021136	0.735082	0.904634	0.588978	0.585654	0.019037	0.332058	0.320336	0.32113	0.726618	0.861354	0.588386	0.584701	0.047913	0.284985	0.296759	0.302307	0.929691	0.998721	0.927786	0.830267	0.898801	0.352238	0.028351	0.291455	0.330931	0.192273	0.211892	0.194348	0.097927	0.240472	0.389378
AE30	sugg	ECG_QRSarea	iso10 vs ctr	>2	10	rs29336739	118543503	11	11	=	0.472672	0.145691	0.264919	0.837203	0.906061	1.19814	0.329639	0.332812	0.825352	0.785179	1.02509	1.50005	0.142399	0.432037	0.283657	0.393415	0.818661	0.735046	0.996393	1.48026	0.233913	0.485014	0.274043	0.382395	2.6117	2.34922	2.18785	2.81932	3.88287	0.554188	0.794408	0.214745	0.204352	1.0347	1.30038	2.06319	0.756564	0.423895	0.816877
AE30	sugg	ECG_QRSarea	iso10 vs ctr	>2	10	rs29353881	118567394	11	11	=	0.472672	0.145691	0.264919	0.837203	0.906061	1.19814	0.329639	0.332812	0.825352	0.785179	1.02509	1.50005	0.142399	0.432037	0.283657	0.393415	0.818661	0.735046	0.996393	1.48026	0.233913	0.485014	0.274043	0.382395	2.6117	2.34922	2.18785	2.81932	3.88287	0.554188	0.794408	0.214745	0.204352	1.0347	1.30038	2.06319	0.756564	0.423895	0.816877
AE31	sugg	ECG_PR	iso10 vs ctr	>2	11	rs3670360	6153674	4	18	=	0.016605	0.342252	0.603641	0.303637	0.994635	0.053998	0.566664	0.470401	0.008796	0.311911	0.299237	0.081505	1.55264	0.519946	0.227192	0.20703	0.008922	0.322036	0.326352	0.096529	1.6574	0.492431	0.265432	0.24175	0.21226	0.833891	0.168174	0.311494	0.280697	3.31723	0.237019	1.28351	1.216	1.37932	1.03683	2.57761	1.25193	0.3339	0.087479
AE32	sugg	AW; BWE	iso10 vs ate; ate vs iso10	<2	11	rs26835473	29088059	13	8	Smek2:Cn:TA:135	0.770954	0.406244	0.088546	0.303446	0.410497	3.54982	6.73949	6.32529	0.19993	0.217256	0.048358	0.304889	0.052314	2.32243	2.78413	2.72947	0.230533	0.226178	0.054604	0.309713	0.125279	2.47183	3.18713	3.12563	0.173792	0.60967	0.451203	0.168265	0.095986	0.418259	2.95588	6.46853	5.95147	0.338315	0.053836	0.257534	0.444821	0.100076	1.34574
AE32	sugg	BWE; AW	iso10 vs ate; ate vs iso10	<2	11	rs26835472	29089165	14	8	Smek2:I	0.743614	0.406163	0.07361	0.316559	0.363973	3.68264	6.33122	5.89788	0.240052	0.27144	0.082463	0.28249	0.013941	2.41123	2.96018	2.90127	0.269815	0.278339	0.086837	0.289674	0.079914	2.57257	3.38538	3.31823	0.220892	0.682485	0.51147	0.216698	0.052853	0.443128	3.13782	7.01131	6.31261	0.193353	0.001482	0.341999	0.528033	0.045281	1.37921
AE32	sugg	BWE; AW	iso10 vs ate; ate vs iso10	<2	11	rs29476991	29102831	8	13	Smek2:I	0.76399	0.418369	0.063825	0.361746	0.392158	3.6982	6.23105	5.72745	0.281273	0.301371	0.07683	0.377415	0.040297	2.38184	2.88892	2.83773	0.317087	0.310285	0.080206	0.384499	0.034012	2.52909	3.30679	3.24588	0.313426	0.726779	0.515202	0.207485	0.056831	0.414951	2.99655	7.00617	6.37741	0.187617	0.019832	0.340802	0.591185	0.101923	1.35364
AE32	sugg	BWE; AW	iso10 vs ate; ate vs iso10	<2	11	rs26822225	29113123	8	14	Smek2:I	0.743614	0.406163	0.07361	0.316559	0.363973	3.68264	6.33122	5.89788	0.240052	0.27144	0.082298	0.28249	0.013941	2.41123	2.96018	2.90127	0.269815	0.278339	0.086837	0.289674	0.079914	2.57257	3.38538	3.31823	0.220892	0.681164	0.51147	0.216698	0.052853	0.443128	3.13782	7.01131	6.28879	0.193353	0.001449	0.341999	0.528033	0.046261	1.37921
AE32	sugg	BWE; AW	iso10 vs ate; ate vs iso10	<2	11	rs26822223	29113345	14	8	Smek2:I	0.743614	0.406163	0.07361	0.316559	0.363973	3.68264	6.33122	5.89788	0.240052	0.27144	0.082463	0.28249	0.013941	2.41123	2.96018	2.90127	0.269815	0.278339	0.086837	0.289674	0.079914	2.57257	3.38538	3.31823	0.220892	0.682485	0.51147	0.216698	0.052853	0.443128	3.13782	7.01131	6.31261	0.193353	0.001482	0.341999	0.528033	0.045281	1.37921
AE32	sugg	BWE; AW	iso10 vs ate; ate vs iso10	<2	11	rs29452663	29124276	8	14	Ccdc104:I	0.743614	0.406163	0.07361	0.316559	0.363973	3.68264	6.33122	5.89788	0.240052	0.27144	0.082298	0.28249	0.013941	2.41123	2.96018	2.90127	0.269815	0.278339	0.086837	0.289674	0.079914	2.57257	3.38538	3.31823	0.220892	0.681164	0.51147	0.216698	0.052853	0.443128	3.13782	7.01131	6.28879	0.193353	0.001449	0.341999	0.528033	0.046261	1.37921
AE33	sugg	ECG_RR; ECG_HR	ate vs ctr	>2	11	rs29447691	60567374	16	4	Top3a:I	0.003301	0.046853	0.088926	0.089108	0.251684	0.225091	0.314035	0.261636	0.711899	0.817371	0.78044	0.499807	0.032474	0.831055	0.763752	0.736054	0.657893	0.735562	0.731793	0.443192	0.018919	0.811421	0.749304	0.722316	0.233751	0.248574	0.222065	0.298996	0.172011	0.153883	0.196377	0.405118	0.414784	0.269023	0.292434	0.243692	0.459191	0.244868	0.11254
AE34	sugg	VWI	ate vs ctr	>2	11	rs26891382	66394727	14	7	=	0.571557	0.540063	0.567083	0.902664	0.023367	0.270265	0.330833	0.283251	0.113777	0.010292	0.154299	0.194362	1.19633	0.365119	0.095279	0.083831	0.140102	0.03529	0.18772	0.235308	1.16602	0.374392	0.111024	0.09878	0.082159	0.055753	0.119771	0.148415	0.239673	0.900203	0.165836	0.666653	0.611197	0.949902	0.573308	0.445742	0.870852	0.612054	0.224312
AE35	sugg	AWI	iso10 vs ctr	<2	11	rs3688126	89110733	15	7	=	0.468303	0.520712	0.451669	0.160788	0.019547	2.52145	2.06625	2.30847	0.310587	0.407802	0.283337	0.004744	0.032479	1.3516	1.3124	1.16853	0.325468	0.41764	0.304914	0.014308	0.022495	1.47424	1.43605	1.28906	0.029307	0.000407	0.011629	0.030466	0.033123	0.100872	0.057624	0.155589	0.161138	0.885311	1.21415	0.781871	0.253991	0.33624	7.91756
AE35	sugg	AWI	iso10 vs ctr	<2	11	rs27079025	89414617	15	7	=	0.468303	0.520712	0.451669	0.160788	0.019547	2.52145	2.06625	2.30847	0.310587	0.407802	0.283337	0.004744	0.032479	1.3516	1.3124	1.16853	0.325468	0.41764	0.304914	0.014308	0.022495	1.47424	1.43605	1.28906	0.029307	0.000407	0.011629	0.030466	0.033123	0.100872	0.057624	0.155589	0.161138	0.885311	1.21415	0.781871	0.253991	0.33624	7.91756
AE35	sugg	AWI	iso10 vs ctr	<2	11	rs29437734	89445078	15	7	=	0.468303	0.520712	0.451669	0.160788	0.019547	2.52145	2.06625	2.30847	0.310587	0.407802	0.283337	0.004744	0.032479	1.3516	1.3124	1.16853	0.325468	0.41764	0.304914	0.014308	0.022495	1.47424	1.43605	1.28906	0.029307	0.000407	0.011629	0.030466	0.033123	0.100872	0.057624	0.155589	0.161138	0.885311	1.21415	0.781871	0.253991	0.33624	7.91756
AE7	SIGNIF	SBP	iso10 vs ate; ate vs iso10	<2	11	rs27050902	108013449	7	14	Prkca:I	0.022593	0.079357	0.070365	0.133036	0.187865	0.465779	0.260117	0.287064	0.263495	0.487428	0.245765	0.385144	0.611678	0.072928	0.261596	0.220674	0.244537	0.440926	0.222073	0.371982	0.553176	0.042744	0.270388	0.23286	0.26958	0.27544	0.373572	0.14853	0.157664	0.230384	0.487619	0.235712	0.253898	0.351826	0.629568	0.306454	0.027195	0.59635	1.97819
AE7	sugg	AWI	iso10 vs ctr	<2	11	rs27021942	108159743	12	10	Prkca:I	0.402902	0.510339	0.349569	0.070023	0.153003	2.00596	1.23355	1.28607	0.558824	0.470711	0.420771	0.022155	0.456463	1.48842	3.0177	2.38183	0.559352	0.476944	0.431894	0.016116	0.40541	1.59395	2.97625	2.40476	0.027233	0.126073	0.009844	0.0957	0.040417	0.483089	0.062698	0.304488	0.30469	0.543316	1.12835	0.363174	0.142781	1.11981	7.50285
AE7	sugg	AWI	iso10 vs ctr	<2	11	rs3707743	108750692	12	8	=	0.282254	0.368474	0.366279	0.093732	0.097987	1.67325	0.987001	1.08474	0.424569	0.393152	0.385675	0.009758	0.307624	1.34614	2.33677	1.81883	0.423561	0.394399	0.399814	0.003009	0.279198	1.43667	2.31784	1.84821	0.003471	0.077226	0.042255	0.085818	0.033142	0.51827	0.173274	0.184909	0.177629	0.433237	0.907168	0.407908	0.17602	1.00881	6.7382
AE8	SIGNIF	AWI	iso10 vs ctr	<2	11	rs27007459	112024896	13	9	=	0.423483	0.752829	0.367652	0.08567	0.541055	3.95926	1.63869	1.71672	0.595631	0.598747	0.369603	0.034017	0.17699	2.68518	3.89783	4.00852	0.596297	0.613016	0.382362	0.037523	0.124818	2.89622	3.87484	4.0456	0.041726	0.139198	0.120661	0.105363	0.000975	0.104377	0.386019	0.626002	0.618353	0.513669	1.04216	0.260525	0.15855	1.44395	8.3208
AE8	SIGNIF	AWI	iso10 vs ctr	<2	11	rs29467284	112055937	13	7	=	0.535161	0.969367	0.643345	0.039469	0.744873	3.90157	1.51095	1.60098	0.534241	0.554605	0.397519	0.047461	0.097602	2.57522	3.64745	3.85045	0.541628	0.579732	0.42867	0.047071	0.036737	2.77913	3.62674	3.87886	0.123054	0.081406	0.057941	0.057007	0.065061	0.077679	0.358456	0.579084	0.559072	0.798751	1.59601	0.602484	0.015043	1.88182	8.17609
AE8	sugg	AWI	iso10 vs ctr	<2	11	rs29419582	112079288	10	12	=	0.211266	0.472694	0.137506	0.275146	0.560108	3.97438	1.66544	1.72692	0.537204	0.658735	0.321289	0.033445	0.072174	3.05721	3.12478	3.3279	0.523659	0.651136	0.318794	0.04773	0.10191	3.30483	3.18261	3.41701	0.005366	0.177079	0.199579	0.11377	0.028657	0.026832	0.51226	0.637982	0.632776	0.095815	0.461261	0.030667	0.66195	1.237	6.87117
AE8	sugg	AWI	iso10 vs ctr	<2	11	rs29444043	112082834	12	10	=	0.211266	0.472694	0.137506	0.275146	0.560108	3.97438	1.66544	1.72692	0.537204	0.660048	0.321289	0.033445	0.072174	3.05721	3.12478	3.3279	0.523659	0.652178	0.318794	0.04773	0.10191	3.30483	3.18261	3.41701	0.005366	0.177079	0.199579	0.11377	0.028657	0.026832	0.51226	0.637982	0.632776	0.095815	0.461261	0.030667	0.66195	1.237	6.87117
AE8	sugg	AWI	iso10 vs ctr	<2	11	rs29397348	112086666	12	10	=	0.211266	0.472694	0.137506	0.275146	0.560108	3.97438	1.66544	1.72692	0.537204	0.660048	0.321289	0.033445	0.072174	3.05721	3.12478	3.3279	0.523659	0.652178	0.318794	0.04773	0.10191	3.30483	3.18261	3.41701	0.005366	0.177079	0.199579	0.11377	0.028657	0.026832	0.51226	0.637982	0.632776	0.095815	0.461261	0.030667	0.66195	1.237	6.87117
AE8	sugg	AWI	iso10 vs ctr	<2	11	rs3672597	112095516	10	10	=	0.105094	0.319331	0.110261	0.30934	0.478225	3.48897	1.3883	1.44387	0.399077	0.523044	0.253635	0.056627	0.13037	2.7376	2.54259	2.71157	0.385264	0.51231	0.252187	0.071998	0.152073	2.9652	2.5952	2.78967	0.003316	0.118266	0.119978	0.088041	0.006171	0.055228	0.367099	0.501664	0.489991	0.023911	0.324116	0.030754	0.677044	1.13519	6.27302
AE8	sugg	AWI	iso10 vs ctr	<2	11	rs29388869	112105637	12	9	=	0.318159	0.438239	0.156182	0.247121	0.289108	3.55813	2.24546	2.32192	0.541102	0.651815	0.32838	0.027937	0.054064	3.02813	3.17358	3.40366	0.536006	0.641606	0.327035	0.040922	0.056071	3.24013	3.30911	3.57055	0.047691	0.252283	0.26586	0.16281	0.068073	0.064218	0.554547	0.76257	0.759187	0.138283	0.34039	0.062931	0.695122	0.869278	6.24239
AE8	sugg	AWI	iso10 vs ctr	<2	11	rs29451767	112126593	12	10	=	0.211266	0.472694	0.137506	0.275146	0.560108	3.97438	1.66544	1.72692	0.537204	0.660048	0.321289	0.033445	0.072174	3.05721	3.12478	3.3279	0.523659	0.652178	0.318794	0.04773	0.10191	3.30483	3.18261	3.41701	0.005366	0.177079	0.199579	0.11377	0.028657	0.026832	0.51226	0.637982	0.632776	0.095815	0.461261	0.030667	0.66195	1.237	6.87117
AE8	sugg	AWI	iso10 vs ctr	<2	11	rs29439950	112204605	12	10	=	0.211266	0.472694	0.137506	0.275146	0.560108	3.97438	1.66544	1.72692	0.537204	0.660048	0.321289	0.033445	0.072174	3.05721	3.12478	3.3279	0.523659	0.652178	0.318794	0.04773	0.10191	3.30483	3.18261	3.41701	0.005366	0.177079	0.199579	0.11377	0.028657	0.026832	0.51226	0.637982	0.632776	0.095815	0.461261	0.030667	0.66195	1.237	6.87117
AE8	sugg	AWI	iso10 vs ctr	<2	11	rs27017170	112221449	12	10	=	0.211266	0.472694	0.137506	0.275146	0.560108	3.97438	1.66544	1.72692	0.537204	0.660048	0.321289	0.033445	0.072174	3.05721	3.12478	3.3279	0.523659	0.652178	0.318794	0.04773	0.10191	3.30483	3.18261	3.41701	0.005366	0.177079	0.199579	0.11377	0.028657	0.026832	0.51226	0.637982	0.632776	0.095815	0.461261	0.030667	0.66195	1.237	6.87117
AE36	sugg	SBP	ate vs iso10	<2	12	rs13481303	11922133	6	14	=	0.038588	0.168244	0.08803	0.080977	0.418386	0.222842	0.057474	0.032647	0.010853	0.005698	0.118182	0.194373	0.435744	0.278382	0.613121	0.519108	0.006843	0.013202	0.122392	0.188823	0.427734	0.235951	0.544086	0.469304	0.406321	0.012048	0.223473	0.190213	0.272376	0.685975	0.021103	0.546856	0.583744	0.008449	0.016714	0.11537	0.200431	0.058854	0.377895
AE36	sugg	SBP	ate vs iso10	<2	12	rs3718992	12000846	14	6	=	0.038563	0.168244	0.08803	0.080977	0.418287	0.222842	0.057474	0.032647	0.010853	0.005698	0.118182	0.194065	0.435744	0.278382	0.613121	0.51879	0.006843	0.013202	0.12415	0.188532	0.427734	0.235951	0.544086	0.469275	0.406321	0.012048	0.223473	0.190213	0.272376	0.687368	0.021103	0.546856	0.583744	0.00845	0.016714	0.114318	0.200431	0.058854	0.377895
AE36	sugg	SBP	ate vs iso10	<2	12	rs3090132	12146013	6	14	=	0.038588	0.168244	0.08803	0.080977	0.418386	0.222842	0.057474	0.032647	0.010853	0.005698	0.118182	0.194373	0.435744	0.278382	0.613121	0.519108	0.006843	0.013202	0.122392	0.188823	0.427734	0.235951	0.544086	0.469304	0.406321	0.012048	0.223473	0.190213	0.272376	0.685975	0.021103	0.546856	0.583744	0.008449	0.016714	0.11537	0.200431	0.058854	0.377895
AE37	sugg	ECG_RR; ECG_HR	ate vs ctr	>2	12	rs29192223	71273669	16	6	Gm804:I	0.139744	0.096227	0.342412	0.038672	0.05441	0.450937	0.515565	0.506176	0.232397	0.519427	0.341358	0.039443	0.919998	2.11468	0.938321	1.09904	0.230373	0.492602	0.346969	0.039176	0.797232	1.98888	0.930245	1.09194	0.143565	0.152727	0.315155	0.18762	0.055444	0.327664	0.761344	0.390322	0.400289	0.051652	0.137502	0.114731	0.205932	0.494503	0.045945
AE37	sugg	ECG_RR; ECG_HR	ate vs ctr	>2	12	rs3667110	71468555	14	6	=	0.13579	0.086539	0.234596	0.057387	0.028235	0.517458	0.558445	0.539125	0.265552	0.45857	0.273411	0.073252	0.610874	2.28013	1.33971	1.56509	0.261173	0.436421	0.273588	0.072412	0.525764	2.16063	1.3079	1.53486	0.056136	0.145641	0.272593	0.148012	0.009492	0.251338	0.85452	0.522609	0.547089	0.044985	0.110259	0.0381	0.162664	0.40347	0.059387
AE37	sugg	ECG_RR	ate vs ctr	>2	12	rs50585161	71510014	15	5	=	0.034533	0.087615	0.254615	0.105583	0.442501	0.666568	0.242399	0.235453	0.186738	0.481705	0.287125	0.072002	1.11609	2.33911	0.921345	1.07761	0.173297	0.457419	0.288563	0.074602	1.12633	2.24213	0.872575	1.03085	0.009327	0.001952	0.14024	0.046097	0.066272	0.445478	0.662125	0.241972	0.245428	0.013422	0.008191	0.226373	0.136431	0.077663	0.291731
AE37	sugg	ECG_RR; ECG_HR	ate vs ctr	>2	12	rs29152891	71661623	6	16	=	0.139744	0.096227	0.342412	0.038688	0.05441	0.450937	0.515565	0.506176	0.232397	0.519427	0.341358	0.039454	0.919998	2.11468	0.938321	1.09904	0.230373	0.492602	0.346969	0.039187	0.797232	1.98888	0.930245	1.09194	0.143565	0.153981	0.315155	0.18762	0.055534	0.327664	0.764506	0.391397	0.401208	0.051652	0.134011	0.114731	0.20588	0.494503	0.045945
AE37	sugg	ECG_RR; ECG_HR	ate vs ctr	>2	12	rs29491724	71817799	14	6	=	0.13579	0.086539	0.234596	0.057387	0.028235	0.517458	0.558445	0.539125	0.265552	0.45857	0.273411	0.073252	0.610874	2.28013	1.33971	1.56509	0.261173	0.436421	0.273588	0.072412	0.525764	2.16063	1.3079	1.53486	0.056136	0.145641	0.272593	0.148012	0.009492	0.251338	0.85452	0.522609	0.547089	0.044985	0.110259	0.0381	0.162664	0.40347	0.059387
AE37	sugg	ECG_RR; ECG_HR	ate vs ctr	>2	12	rs29140481	71974647	16	6	Frmd6:I	0.139744	0.096227	0.342412	0.038672	0.05441	0.450937	0.515565	0.506176	0.232397	0.519427	0.341358	0.039443	0.919998	2.11468	0.938321	1.09904	0.230373	0.492602	0.346969	0.039176	0.797232	1.98888	0.930245	1.09194	0.143565	0.152727	0.315155	0.18762	0.055444	0.327664	0.761344	0.390322	0.400289	0.051652	0.137502	0.114731	0.205932	0.494503	0.045945
AE37	sugg	ECG_RR; ECG_HR	ate vs ctr	>2	12	rs50435063	72060044	6	14	Actr10:I	0.044238	0.017944	0.247386	0.102628	0.049097	0.384704	0.419418	0.416788	0.144834	0.380763	0.217054	0.110611	0.795431	1.93354	0.872435	1.03374	0.141378	0.357707	0.220792	0.110911	0.691241	1.82192	0.858027	1.02114	0.054741	0.075203	0.203161	0.101889	0.006778	0.27708	0.586345	0.279559	0.291789	0.001691	0.169758	0.10676	0.245704	0.442604	0.050624
AE37	sugg	ECG_RR; ECG_HR	ate vs ctr	>2	12	rs29144997	72106005	14	6	=	0.13579	0.086539	0.234596	0.057387	0.028235	0.517458	0.558445	0.539125	0.265552	0.45857	0.273411	0.073252	0.610874	2.28013	1.33971	1.56509	0.261173	0.436421	0.273588	0.072412	0.525764	2.16063	1.3079	1.53486	0.056136	0.145641	0.272593	0.148012	0.009492	0.251338	0.85452	0.522609	0.547089	0.044985	0.110259	0.0381	0.162664	0.40347	0.059387
AE37	sugg	ECG_RR; ECG_HR	ate vs ctr	>2	12	rs29191971	72450224	6	15	=	0.080031	0.037823	0.270436	0.071116	0.07843	0.362028	0.440186	0.433511	0.189165	0.457844	0.281132	0.065331	0.873279	2.0095	0.86216	1.03113	0.185769	0.431393	0.284665	0.065894	0.75355	1.88654	0.852251	1.02292	0.087652	0.107198	0.254603	0.127952	0.020498	0.300113	0.685668	0.341892	0.351477	0.012089	0.19115	0.09293	0.206683	0.522542	0.012085
AE37	sugg	ECG_RR; ECG_HR	ate vs ctr	>2	12	rs3700688	72479811	16	6	=	0.139744	0.096227	0.342412	0.038672	0.05441	0.450937	0.515565	0.506176	0.232397	0.519427	0.341358	0.039443	0.919998	2.11468	0.938321	1.09904	0.230373	0.492602	0.346969	0.039176	0.797232	1.98888	0.930245	1.09194	0.143565	0.152727	0.315155	0.18762	0.055444	0.327664	0.761344	0.390322	0.400289	0.051652	0.137502	0.114731	0.205932	0.494503	0.045945
AE37	sugg	ECG_RR; ECG_HR	ate vs ctr	>2	12	rs29151401	72480315	6	16	=	0.139744	0.096227	0.342412	0.038688	0.05441	0.450937	0.515565	0.506176	0.232397	0.519427	0.341358	0.039454	0.919998	2.11468	0.938321	1.09904	0.230373	0.492602	0.346969	0.039187	0.797232	1.98888	0.930245	1.09194	0.143565	0.153981	0.315155	0.18762	0.055534	0.327664	0.764506	0.391397	0.401208	0.051652	0.134011	0.114731	0.20588	0.494503	0.045945
AE38	sugg	VWI	ate vs iso10	<2	13	rs30022373	60653518	16	4	=	0.175047	0.320758	0.345934	0.028765	0.216365	0.697684	0.339225	0.368644	0.126531	0.067253	0.024409	0.300389	0.4083	1.25455	2.38543	2.81191	0.130883	0.080371	0.043258	0.274639	0.339328	1.20641	2.13808	2.57453	0.247067	0.049906	0.098693	0.031737	0.027634	0.537173	0.346198	0.137292	0.131283	0.215272	0.668469	0.469832	0.016304	1.59624	2.40424
AE38	sugg	VWI	ate vs iso10	<2	13	rs6362489	60677576	5	15	=	0.425046	0.566375	0.62153	0.135994	0.038087	0.931895	0.565911	0.624919	0.283447	0.237296	0.174846	0.170368	0.423777	1.73445	3.05158	3.38093	0.299465	0.255353	0.205396	0.146829	0.40815	1.66894	2.81883	3.18142	0.079671	0.278663	0.168888	0.227554	0.274588	0.450812	0.179812	0.188971	0.190347	0.234116	0.508193	0.287074	0.107501	0.794813	2.68011
AE38	sugg	VWI	ate vs iso10	>2	13	rs29862772	60734093	4	16	Dapk1:I	0.672458	0.998345	0.798888	0.370932	0.173282	1.07289	0.501543	0.536043	0.562776	0.517421	0.333996	0.02902	0.500132	1.94196	3.71688	4.30365	0.584862	0.548444	0.373814	0.006665	0.455276	1.87058	3.34093	3.94717	0.332558	0.835678	0.677035	0.685436	0.587331	0.585748	0.005629	0.557316	0.594811	0.103866	0.505872	0.085308	0.060638	1.71551	2.3434
AE39	sugg	VW	ate vs iso10	<2	13	rs29980331	83791036	5	17	Mef2c:I	3.79275	4.15864	3.93849	1.69976	0.134063	1.66229	1.16219	1.30109	1.45781	1.63019	1.39172	0.318617	0.282976	3.48122	5.5258	6.17015	1.59042	1.76476	1.57899	0.384119	0.257464	3.37341	5.06805	5.77515	1.63138	2.09107	2.56428	2.24927	1.36183	0.095395	0.804654	1.30269	1.39586	1.22797	1.41484	0.519048	0.445646	0.322074	1.13196
AE40	sugg	ECG_QTc	iso10 vs ctr	>2	13	rs3655069	84264530	5	17	=	0.828103	0.30819	0.306396	0.434494	1.40383	0.265154	0.342591	0.378236	0.900747	0.721018	0.7343	0.976117	1.10164	0.198464	0.21176	0.038587	0.909569	0.692305	0.734916	0.947694	1.21343	0.203769	0.23234	0.059874	0.553629	0.863954	0.308059	0.514275	0.799364	2.85823	1.09803	0.220478	0.215454	0.230679	0.215269	0.000324	0.01872	0.067751	0.210572
AE40	sugg	ECG_QTc	iso10 vs ctr	>2	13	rs29959750	84355401	5	17	=	0.828103	0.30819	0.306396	0.434494	1.40383	0.265154	0.342591	0.378236	0.900747	0.721018	0.7343	0.976117	1.10164	0.198464	0.21176	0.038587	0.909569	0.692305	0.734916	0.947694	1.21343	0.203769	0.23234	0.059874	0.553629	0.863954	0.308059	0.514275	0.799364	2.85823	1.09803	0.220478	0.215454	0.230679	0.215269	0.000324	0.01872	0.067751	0.210572
AE40	sugg	ECG_QTc	iso10 vs ctr	>2	13	rs29527610	84361107	17	5	Tmem161b:L	0.828103	0.30819	0.306396	0.434494	1.40383	0.265154	0.341528	0.378236	0.900747	0.721018	0.7343	0.976117	1.10164	0.198464	0.21176	0.038587	0.909569	0.692305	0.734916	0.947694	1.21343	0.203769	0.23234	0.059874	0.553629	0.863954	0.308059	0.514275	0.799364	2.85823	1.09803	0.220478	0.215454	0.230679	0.215269	0.000324	0.01872	0.067751	0.210572
AE40	sugg	ECG_QTc	iso10 vs ctr	>2	13	rs48930756	84399559	17	5	Tmem161b:I	0.828103	0.30819	0.306396	0.434494	1.40383	0.265154	0.341528	0.378236	0.900747	0.721018	0.7343	0.976117	1.10164	0.198464	0.21176	0.038587	0.909569	0.692305	0.734916	0.947694	1.21343	0.203769	0.23234	0.059874	0.553629	0.863954	0.308059	0.514275	0.799364	2.85823	1.09803	0.220478	0.215454	0.230679	0.215269	0.000324	0.01872	0.067751	0.210572
AE41	sugg	ECG_QRSarea	iso10 vs ctr	>2	13	rs30058152	108473939	10	12	=	0.583067	1.00102	1.13219	0.473266	0.9328	0.777662	0.133683	0.170259	0.070571	0.080911	0.131407	0.009048	0.016555	0.144988	0.142382	0.173266	0.092683	0.120092	0.180059	0.033191	0.059762	0.17634	0.126279	0.158818	0.100558	0.027594	0.013465	0.061019	0.137076	0.151247	0.44693	0.243358	0.268798	1.51509	2.5156	2.00561	1.61116	1.05289	0.578222
AE9	SIGNIF	SBP	iso10 vs ate; ate vs iso10	<2	14	rs6175633	23012074	5	15	1700112E06Rik:I	0.501815	0.270153	0.526868	0.738093	0.474661	0.671632	0.177578	0.179057	0.648759	0.510065	0.454376	0.508697	0.750726	0.028523	0.331697	0.319205	0.647608	0.501596	0.467671	0.534215	0.722937	0.064668	0.266218	0.264396	0.374751	0.641336	0.358564	0.531579	0.523688	0.838871	0.312986	0.280875	0.318954	0.098167	0.073751	0.122641	0.511663	0.0587	0.708028
AE42	sugg	SBP	iso10 vs ate	<2	14	rs30948602	72477142	13	7	=	0.054415	0.020229	0.025182	0.416006	0.298642	1.39892	0.721944	0.664249	0.140612	0.195354	0.130434	0.336894	0.022216	0.231071	0.3032	0.245246	0.134205	0.18109	0.127685	0.349889	0.004129	0.288794	0.344556	0.283557	0.771469	0.906898	0.825401	0.80469	1.16978	0.253725	0.572991	0.166323	0.160308	0.973113	0.990372	0.902732	0.292105	0.183083	1.44464
AE42	sugg	SBP	iso10 vs ate	<2	14	rs13482249	72653813	7	13	=	0.039214	0.031312	0.016728	0.42581	0.224291	1.46838	0.804665	0.810899	0.165406	0.162939	0.118735	0.331166	0.14781	0.362368	0.266436	0.212709	0.157437	0.151205	0.112243	0.3437	0.14935	0.427637	0.317008	0.258883	0.739882	0.897871	0.773694	0.785458	1.10238	0.360711	0.470611	0.054215	0.04653	1.11361	0.950679	1.05772	0.200716	0.061731	1.59139
AE43	sugg	AWI	iso10 vs ate; ate vs iso10	<2	14	rs31047464	82826478	15	7	=	0.404149	0.027123	0.113247	0.603052	1.14897	1.52528	4.31623	4.18369	0.238072	0.43025	0.261313	0.729556	0.66269	0.363137	1.01344	0.800676	0.194069	0.394194	0.235289	0.735715	0.812743	0.434721	1.23337	0.988589	0.311805	0.143122	0.331323	0.294353	0.494037	0.323995	0.296866	0.660771	0.646699	1.0916	0.41603	0.500393	0.317838	1.25973	1.84086
AE44	sugg	ECG_Ramp	iso10 vs ctr	<2	15	rs13482468	20748299	10	10	=	0.378998	0.885238	0.417982	0.163163	0.761428	1.39496	0.270255	0.317732	0.118992	0.13793	0.018863	0.011028	0.058234	0.353465	0.373052	0.365135	0.135524	0.172473	0.040252	0.000873	0.001539	0.418365	0.376938	0.373166	0.122716	0.263905	0.130607	0.248453	0.515366	0.384513	1.01768	0.337639	0.377966	1.79961	2.53209	1.48149	1.33553	0.509093	0.767485
AE45	sugg	ECG_QRSarea	iso10 vs ctr	>2	15	rs32321025	21506098	12	10	Cdh12:I	0.124832	0.072557	0.037632	0.201376	0.778643	0.565122	0.046713	0.07497	0.345296	0.345348	0.383058	0.370372	0.089901	0.015755	0.087143	0.07378	0.337904	0.31081	0.356401	0.364142	0.174985	0.017394	0.088324	0.074691	1.35228	1.79652	1.67601	1.79757	2.03493	0.447322	0.210229	0.099792	0.10205	2.12697	2.58951	3.88632	1.7428	0.407714	0.612067
AE45	sugg	ECG_QRSarea	iso10 vs ctr	>2	15	rs32270441	21518771	10	12	Cdh12:U	0.124832	0.072557	0.037632	0.201376	0.778643	0.565122	0.046713	0.07497	0.346727	0.345348	0.383058	0.370372	0.089796	0.015755	0.087143	0.07378	0.339276	0.31081	0.356401	0.364142	0.174921	0.017394	0.088324	0.074691	1.35228	1.79652	1.67601	1.79757	2.03493	0.447322	0.210229	0.099792	0.10205	2.12697	2.58951	3.83633	1.7428	0.407714	0.612067
AE45	sugg	ECG_QRSarea	iso10 vs ctr	>2	15	rs32186391	21526166	12	10	=	0.124832	0.072557	0.037632	0.201376	0.778643	0.565122	0.046713	0.07497	0.345296	0.345348	0.383058	0.370372	0.089901	0.015755	0.087143	0.07378	0.337904	0.31081	0.356401	0.364142	0.174985	0.017394	0.088324	0.074691	1.35228	1.79652	1.67601	1.79757	2.03493	0.447322	0.210229	0.099792	0.10205	2.12697	2.58951	3.88632	1.7428	0.407714	0.612067
AE45	sugg	ECG_QRSarea	iso10 vs ctr	>2	15	rs13482476	22262014	13	7	=	0.140848	0.474741	0.262228	0.207988	0.849162	0.333217	0.134723	0.094942	0.10453	0.167664	0.251149	0.185381	0.245135	0.034366	0.076752	0.124733	0.091444	0.126972	0.220377	0.156035	0.122927	0.017223	0.041666	0.090034	0.446612	0.376632	0.400549	0.46675	0.59041	0.069509	0.232328	0.130373	0.158824	1.15697	2.32391	1.77071	2.00433	1.04746	0.239426
AE45	sugg	ECG_QRSarea	iso10 vs ctr	>2	15	rs32191286	22396467	8	13	=	0.186352	0.557444	0.348718	0.238532	0.848828	0.390177	0.104714	0.058781	0.085037	0.095299	0.186674	0.152289	0.080449	0.029395	0.052469	0.100287	0.0709	0.060291	0.153121	0.124464	0.003215	0.045475	0.023061	0.071344	0.321435	0.34631	0.322823	0.417785	0.515189	0.129831	0.261357	0.103019	0.130708	1.2533	2.35159	1.96699	1.92588	0.942022	0.281255
AE10	SIGNIF	SBP	iso10 vs ate; ate vs iso10	<2	15	rs31909803	43683377	14	8	=	1.64828	1.11399	1.49586	1.32419	0.344529	0.004533	0.251269	0.257419	1.41819	1.62471	1.66244	1.14163	0.084289	0.393063	0.471717	0.42969	1.4572	1.6166	1.73255	1.18399	0.098814	0.358701	0.44822	0.415302	1.24143	1.38701	1.3529	1.38683	0.999617	0.257914	0.292646	0.735313	0.785224	0.546985	0.295934	0.226922	0.631428	0.210927	0.334456
AE10	SIGNIF	SBP	iso10 vs ate; ate vs iso10	<2	15	rs32036914	43684611	14	8	=	1.64828	1.11399	1.49586	1.32419	0.344529	0.004533	0.251269	0.257419	1.41819	1.62471	1.66244	1.14163	0.084289	0.393063	0.471717	0.42969	1.4572	1.6166	1.73255	1.18399	0.098814	0.358701	0.44822	0.415302	1.24143	1.38701	1.3529	1.38683	0.999617	0.257914	0.292646	0.735313	0.785224	0.546985	0.295934	0.226922	0.631428	0.210927	0.334456
AE10	SIGNIF	SBP	iso10 vs ate; ate vs iso10	<2	15	rs13482543	43702439	13	7	=	1.34634	0.851204	1.21693	1.16688	0.378182	0.130292	0.144926	0.13466	1.20065	1.2658	1.35435	0.935561	0.272093	0.195502	0.403454	0.359045	1.23023	1.2591	1.41035	0.983602	0.278223	0.167197	0.372955	0.337431	1.07977	1.19593	1.07534	1.21284	0.835679	0.391729	0.188374	0.705731	0.753675	0.406564	0.208338	0.146062	0.633301	0.167498	0.515284
AE10	SIGNIF	SBP	iso10 vs ate; ate vs iso10	<2	15	rs32404678	43722455	8	14	=	1.64828	1.11399	1.49586	1.32419	0.344529	0.004533	0.251269	0.257644	1.41819	1.62471	1.66244	1.14163	0.084289	0.393063	0.471717	0.42969	1.4572	1.6166	1.73255	1.18399	0.098814	0.358701	0.44822	0.415302	1.24143	1.38701	1.3529	1.41929	0.999617	0.257914	0.292646	0.735313	0.785224	0.546985	0.295934	0.226922	0.631428	0.210927	0.334456
AE10	SIGNIF	SBP	iso10 vs ate; ate vs iso10	<2	15	rs32084862	43730798	8	14	=	1.64828	1.11399	1.49586	1.32419	0.344529	0.004533	0.251269	0.257644	1.41819	1.62471	1.66244	1.14163	0.084289	0.393063	0.471717	0.42969	1.4572	1.6166	1.73255	1.18399	0.098814	0.358701	0.44822	0.415302	1.24143	1.38701	1.3529	1.41929	0.999617	0.257914	0.292646	0.735313	0.785224	0.546985	0.295934	0.226922	0.631428	0.210927	0.334456
AE10	SIGNIF	SBP	iso10 vs ate; ate vs iso10	<2	15	rs31919387	43746632	7	14	=	1.55643	1.04092	1.42132	1.24091	0.434886	0.027666	0.253005	0.298863	1.51449	1.69326	1.74454	1.16267	0.056707	0.410224	0.462077	0.417496	1.5415	1.67887	1.77473	1.20271	0.080779	0.373694	0.444441	0.407425	1.18998	1.33271	1.28428	1.31481	0.964983	0.236942	0.226826	0.641717	0.677774	0.567937	0.259931	0.215931	0.551107	0.318174	0.311794
AE10	SIGNIF	SBP	iso10 vs ate; ate vs iso10	<2	15	rs31905154	43751438	14	8	=	1.64828	1.11399	1.49586	1.32419	0.344529	0.004533	0.251269	0.257419	1.41819	1.62471	1.66244	1.14163	0.084289	0.393063	0.471717	0.42969	1.4572	1.6166	1.73255	1.18399	0.098814	0.358701	0.44822	0.415302	1.24143	1.38701	1.3529	1.38683	0.999617	0.257914	0.292646	0.735313	0.785224	0.546985	0.295934	0.226922	0.631428	0.210927	0.334456
AE10	SIGNIF	SBP	iso10 vs ate; ate vs iso10	<2	15	rs31857654	43773392	14	8	=	1.64828	1.11399	1.49586	1.32419	0.344529	0.004533	0.251269	0.257419	1.41819	1.62471	1.66244	1.14163	0.084289	0.393063	0.471717	0.42969	1.4572	1.6166	1.73255	1.18399	0.098814	0.358701	0.44822	0.415302	1.24143	1.38701	1.3529	1.38683	0.999617	0.257914	0.292646	0.735313	0.785224	0.546985	0.295934	0.226922	0.631428	0.210927	0.334456
AE10	SIGNIF	SBP	iso10 vs ate; ate vs iso10	<2	15	rs32258680	43773556	8	13	=	2.15297	1.37282	1.87443	1.48291	0.438766	0.049967	0.362708	0.369264	1.68704	1.97136	1.99616	1.22727	0.10697	0.548995	0.685136	0.5971	1.75875	1.96767	2.09635	1.27757	0.139353	0.505092	0.671614	0.594891	2.00702	1.8446	1.99069	1.99594	1.36182	0.245688	0.348988	0.789356	0.835915	0.567771	0.277526	0.185611	0.536115	0.303018	0.248304
AE10	SIGNIF	SBP	iso10 vs ate; ate vs iso10	<2	15	rs32492976	43773582	14	8	=	1.64828	1.11399	1.49586	1.32419	0.344529	0.004533	0.251269	0.257419	1.41819	1.62471	1.66244	1.14163	0.084289	0.393063	0.471717	0.42969	1.4572	1.6166	1.73255	1.18399	0.098814	0.358701	0.44822	0.415302	1.24143	1.38701	1.3529	1.38683	0.999617	0.257914	0.292646	0.735313	0.785224	0.546985	0.295934	0.226922	0.631428	0.210927	0.334456
AE10	SIGNIF	SBP	iso10 vs ate; ate vs iso10	<2	15	rs31674965	43785064	8	14	=	1.64828	1.11399	1.49586	1.32419	0.344529	0.004533	0.251269	0.257644	1.41819	1.62471	1.66244	1.14163	0.084289	0.393063	0.471717	0.42969	1.4572	1.6166	1.73255	1.18399	0.098814	0.358701	0.44822	0.415302	1.24143	1.38701	1.3529	1.41929	0.999617	0.257914	0.292646	0.735313	0.785224	0.546985	0.295934	0.226922	0.631428	0.210927	0.334456
AE10	SIGNIF	SBP	iso10 vs ate; ate vs iso10	<2	15	rs32454260	43785721	14	8	=	1.64828	1.11399	1.49586	1.32419	0.344529	0.004533	0.251269	0.257419	1.41819	1.62471	1.66244	1.14163	0.084289	0.393063	0.471717	0.42969	1.4572	1.6166	1.73255	1.18399	0.098814	0.358701	0.44822	0.415302	1.24143	1.38701	1.3529	1.38683	0.999617	0.257914	0.292646	0.735313	0.785224	0.546985	0.295934	0.226922	0.631428	0.210927	0.334456
AE10	SIGNIF	SBP	iso10 vs ate; ate vs iso10	<2	15	rs3663560	43888310	8	14	=	1.64828	1.11399	1.49586	1.32419	0.344529	0.004533	0.251269	0.257644	1.41819	1.62471	1.66244	1.14163	0.084289	0.393063	0.471717	0.42969	1.4572	1.6166	1.73255	1.18399	0.098814	0.358701	0.44822	0.415302	1.24143	1.38701	1.3529	1.41929	0.999617	0.257914	0.292646	0.735313	0.785224	0.546985	0.295934	0.226922	0.631428	0.210927	0.334456
AE10	SIGNIF	SBP	iso10 vs ate; ate vs iso10	<2	15	rs31776043	43897588	8	14	=	1.64828	1.11399	1.49586	1.32419	0.344529	0.004533	0.251269	0.257644	1.41819	1.62471	1.66244	1.14163	0.084289	0.393063	0.471717	0.42969	1.4572	1.6166	1.73255	1.18399	0.098814	0.358701	0.44822	0.415302	1.24143	1.38701	1.3529	1.41929	0.999617	0.257914	0.292646	0.735313	0.785224	0.546985	0.295934	0.226922	0.631428	0.210927	0.334456
AE10	SIGNIF	SBP	iso10 vs ate; ate vs iso10	<2	15	rs31879413	43902896	8	14	=	1.64828	1.11399	1.49586	1.32419	0.344529	0.004533	0.251269	0.257644	1.41819	1.62471	1.66244	1.14163	0.084289	0.393063	0.471717	0.42969	1.4572	1.6166	1.73255	1.18399	0.098814	0.358701	0.44822	0.415302	1.24143	1.38701	1.3529	1.41929	0.999617	0.257914	0.292646	0.735313	0.785224	0.546985	0.295934	0.226922	0.631428	0.210927	0.334456
AE10	SIGNIF	SBP	iso10 vs ate; ate vs iso10	<2	15	rs32181155	43928645	12	8	=	2.06172	1.31103	1.82211	1.44123	0.493522	0.028887	0.34287	0.348972	1.60633	1.89244	1.89879	1.16845	0.160028	0.517694	0.664085	0.578441	1.6745	1.88834	2.00226	1.21668	0.1996	0.475209	0.649187	0.574737	2.04382	1.83813	1.93766	2.02266	1.38149	0.270971	0.324074	0.742105	0.790713	0.541796	0.259069	0.171974	0.507256	0.325	0.267886
AE10	SIGNIF	SBP	iso10 vs ate; ate vs iso10	<2	15	rs31611956	43928822	8	12	=	2.40957	1.424	2.04576	1.51216	0.550479	0.058463	0.43863	0.45201	1.49901	1.72006	1.7654	1.11065	0.194703	0.413016	0.575326	0.508329	1.57591	1.72351	1.87241	1.16321	0.240051	0.378549	0.572825	0.514144	1.74084	1.61376	1.74425	1.75254	1.17292	0.218982	0.342117	0.72748	0.782362	1.01505	0.445474	0.40485	0.806253	0.475776	0.230121
AE10	SIGNIF	SBP	iso10 vs ate; ate vs iso10	<2	15	rs3670373	43973611	14	8	=	1.64828	1.11399	1.49586	1.32419	0.344529	0.004533	0.251269	0.257419	1.41819	1.62471	1.66244	1.14163	0.084289	0.393063	0.471717	0.42969	1.4572	1.6166	1.73255	1.18399	0.098814	0.358701	0.44822	0.415302	1.24143	1.38701	1.3529	1.38683	0.999617	0.257914	0.292646	0.735313	0.785224	0.546985	0.295934	0.226922	0.631428	0.210927	0.334456
AE10	SIGNIF	SBP	iso10 vs ate; ate vs iso10	<2	15	rs32471770	44030348	14	8	Trhr:I	1.64828	1.11399	1.49586	1.32419	0.344529	0.004533	0.251269	0.257419	1.41819	1.62471	1.66244	1.14163	0.084289	0.393063	0.471717	0.42969	1.4572	1.6166	1.73255	1.18399	0.098814	0.358701	0.44822	0.415302	1.24143	1.38701	1.3529	1.38683	0.999617	0.257914	0.292646	0.735313	0.785224	0.546985	0.295934	0.226922	0.631428	0.210927	0.334456
AE10	SIGNIF	SBP	iso10 vs ate; ate vs iso10	<2	15	rs32433602	44030379	13	8	Trhr:I	2.15297	1.37282	1.87443	1.48291	0.438766	0.049967	0.362708	0.369264	1.68704	1.97136	1.99616	1.22727	0.10697	0.548995	0.685136	0.5971	1.75875	1.96767	2.09635	1.27757	0.139353	0.505092	0.671614	0.594891	2.00702	1.8446	1.99069	1.99594	1.36182	0.245688	0.348988	0.789356	0.835915	0.567771	0.277526	0.185611	0.536115	0.303018	0.248304
AE10	SIGNIF	SBP	iso10 vs ate; ate vs iso10	<2	15	rs31778008	44106254	8	13	=	2.15297	1.37282	1.87443	1.48291	0.438766	0.049967	0.362708	0.369264	1.68704	1.97136	1.99616	1.22727	0.10697	0.548995	0.685136	0.5971	1.75875	1.96767	2.09635	1.27757	0.139353	0.505092	0.671614	0.594891	2.00702	1.8446	1.99069	1.99594	1.36182	0.245688	0.348988	0.789356	0.835915	0.567771	0.277526	0.185611	0.536115	0.303018	0.248304
AE10	SIGNIF	SBP	iso10 vs ate; ate vs iso10	<2	15	rs32269245	44109156	7	14	=	0.984284	0.576307	0.797083	1.02599	0.544521	0.460737	0.024054	0.022144	1.04839	1.17204	1.06462	0.918834	0.15399	0.15766	0.247581	0.22111	1.06112	1.14634	1.09214	0.948853	0.176397	0.115509	0.214547	0.195843	0.692791	0.965882	0.823151	0.778627	0.677221	0.394993	0.070304	0.51863	0.558808	0.272619	0.06893	0.121899	0.643993	0.316785	1.05052
AE10	SIGNIF	SBP	iso10 vs ate; ate vs iso10	<2	15	rs31641514	44109888	8	13	=	2.15297	1.37282	1.87443	1.48291	0.438766	0.049967	0.362708	0.369264	1.68704	1.97136	1.99616	1.22727	0.10697	0.548995	0.685136	0.5971	1.75875	1.96767	2.09635	1.27757	0.139353	0.505092	0.671614	0.594891	2.00702	1.8446	1.99069	1.99594	1.36182	0.245688	0.348988	0.789356	0.835915	0.567771	0.277526	0.185611	0.536115	0.303018	0.248304
AE10	SIGNIF	SBP	iso10 vs ate; ate vs iso10	<2	15	rs32392593	44153903	8	14	=	1.64828	1.11399	1.49586	1.32419	0.344529	0.004533	0.251269	0.257644	1.41819	1.62471	1.66244	1.14163	0.084289	0.393063	0.471717	0.42969	1.4572	1.6166	1.73255	1.18399	0.098814	0.358701	0.44822	0.415302	1.24143	1.38701	1.3529	1.41929	0.999617	0.257914	0.292646	0.735313	0.785224	0.546985	0.295934	0.226922	0.631428	0.210927	0.334456
AE10	SIGNIF	SBP	iso10 vs ate; ate vs iso10	<2	15	rs31814120	44155909	8	13	=	2.15297	1.37282	1.87443	1.48291	0.438766	0.049967	0.362708	0.369264	1.68704	1.97136	1.99616	1.22727	0.10697	0.548995	0.685136	0.5971	1.75875	1.96767	2.09635	1.27757	0.139353	0.505092	0.671614	0.594891	2.00702	1.8446	1.99069	1.99594	1.36182	0.245688	0.348988	0.789356	0.835915	0.567771	0.277526	0.185611	0.536115	0.303018	0.248304
AE10	SIGNIF	SBP	iso10 vs ate; ate vs iso10	<2	15	rs32258695	44183403	8	14	=	1.64828	1.11399	1.49586	1.32419	0.344529	0.004533	0.251269	0.257644	1.41819	1.62471	1.66244	1.14163	0.084289	0.393063	0.471717	0.42969	1.4572	1.6166	1.73255	1.18399	0.098814	0.358701	0.44822	0.415302	1.24143	1.38701	1.3529	1.41929	0.999617	0.257914	0.292646	0.735313	0.785224	0.546985	0.295934	0.226922	0.631428	0.210927	0.334456
AE10	SIGNIF	SBP	iso10 vs ate; ate vs iso10	<2	15	rs32171856	44902768	8	12	=	1.57359	1.06965	1.4036	1.23042	0.373568	0.045361	0.387522	0.40408	1.30351	1.47878	1.53053	1.11724	0.100551	0.514133	0.63404	0.672994	1.34022	1.4718	1.59263	1.14755	0.116359	0.470547	0.602404	0.642031	1.00812	1.31438	1.25934	1.27234	0.912607	0.31519	0.381394	1.19987	1.2716	0.529662	0.292726	0.208641	0.570648	0.188681	0.273943
AE46	sugg	HR_TC	iso10 vs ctr	>2	15	rs31630682	61060751	11	9	=	2.26785	0.943014	0.917165	0.979803	1.39299	0.032908	1.26299	1.4676	1.22244	0.767335	0.899992	0.897382	2.98128	0.078325	0.693766	0.576952	1.30045	0.791399	0.945439	0.922181	2.92124	0.067843	0.761453	0.639134	0.749889	1.41428	0.869045	0.936967	0.873692	1.55885	0.036128	1.31047	1.34337	0.802223	0.489148	0.132781	0.39243	0.418995	0.022359
AE47	sugg	HW; VW	iso10 vs ctr	>2	15	rs32320168	68390876	5	17	=	0.104102	0.076068	0.235913	0.834672	0.579821	3.36168	1.57936	1.52601	0.216639	0.524288	0.041073	0.376874	0.745348	6.19869	3.43458	3.41941	0.195694	0.491815	0.022084	0.410028	0.775051	6.38159	3.41553	3.44214	0.459722	0.156101	0.062435	0.398823	0.75748	0.318163	2.60974	1.69781	1.71582	0.034998	0.130143	0.009496	0.36264	0.459101	1.46333
AE48	sugg	AWI	iso10 vs ate; ate vs iso10	<2	15	rs32075962	95817772	13	9	=	1.79394	1.10367	1.63414	0.207779	0.576954	1.77235	3.59558	3.96114	0.478561	0.622921	0.674633	0.098748	0.063011	1.46177	1.38545	1.2749	0.541304	0.655315	0.759845	0.10789	0.01083	1.51741	1.57785	1.45657	0.461849	0.367517	0.406908	0.385863	0.281898	0.079847	0.22145	0.349136	0.360974	2.0381	1.25258	1.2075	0.024354	0.442763	2.63727
AE49	sugg	AW	ate vs ctr	>2	16	rs4185220	49924955	11	11	=	0.074371	0.409503	0.156721	0.053279	6.21531	0.670096	0.364591	0.328912	0.061876	0.238786	0.036773	0.03625	0.854136	0.391112	0.001667	0.008309	0.051073	0.255203	0.028089	0.037724	1.1867	0.441208	0.028009	0.018976	0.176685	0.167839	0.037029	0.192016	0.32979	1.21333	1.18364	0.120909	0.120333	0.152819	0.665273	0.096533	0.688929	2.39329	0.126201
AE49	sugg	AW	ate vs ctr	>2	16	rs4185261	49955284	9	11	=	0.040178	0.404952	0.075805	0.210256	6.80428	0.320393	0.76801	0.690956	0.033466	0.174909	0.016551	0.007069	0.659865	0.321203	0.014718	0.031818	0.027319	0.193716	0.0134	0.019003	0.955922	0.336312	0.030747	0.010118	0.022476	0.016371	0.202134	0.0008	0.036809	1.09272	0.676421	0.036279	0.041362	0.02757	0.398766	0.024176	0.570439	2.57818	0.004952
AE49	sugg	AW	ate vs ctr	>2	16	rs4185313	50004870	9	12	=	0.042234	0.420544	0.056616	0.246653	7.38871	0.220937	0.823531	0.75504	0.030985	0.177683	0.021355	0.008273	0.706587	0.320287	0.003866	0.024329	0.02493	0.197287	0.01905	0.02245	1.01928	0.327271	0.047561	0.022013	0.00506	0.028372	0.228984	0.021211	0.007048	1.1767	0.588272	0.008542	0.00171	0.048418	0.376346	0.029271	0.601342	2.78016	0.05159
AE49	sugg	AW	ate vs ctr	>2	16	rs4185317	50010628	11	11	=	0.074371	0.409503	0.156721	0.053279	6.21531	0.670096	0.364591	0.328912	0.061876	0.238786	0.036773	0.03625	0.854136	0.391112	0.001667	0.008309	0.051073	0.255203	0.028089	0.037724	1.1867	0.441208	0.028009	0.018976	0.176685	0.167839	0.037029	0.192016	0.32979	1.21333	1.18364	0.120909	0.120333	0.152819	0.665273	0.096533	0.688929	2.39329	0.126201
AE49	sugg	AW	ate vs ctr	>2	16	rs4185343	50017338	11	11	=	0.074371	0.409503	0.156721	0.053279	6.21531	0.670096	0.364591	0.328912	0.063396	0.238786	0.036773	0.03625	0.846451	0.391112	0.001667	0.008309	0.052269	0.255203	0.028089	0.037724	1.1757	0.441208	0.028009	0.018976	0.176685	0.167839	0.037029	0.192016	0.32979	1.21333	1.18364	0.120909	0.120333	0.152819	0.665273	0.096533	0.688929	2.39329	0.126201
AE49	sugg	AW	ate vs ctr	>2	16	rs4185396	50074141	11	11	=	0.074371	0.409503	0.156721	0.053279	6.21531	0.670096	0.364591	0.328912	0.063396	0.238786	0.036773	0.03625	0.846451	0.391112	0.001667	0.008309	0.052269	0.255203	0.028089	0.037724	1.1757	0.441208	0.028009	0.018976	0.176685	0.167839	0.037029	0.192016	0.32979	1.21333	1.18364	0.120909	0.120333	0.152819	0.665273	0.096533	0.688929	2.39329	0.126201
AE49	sugg	AW	ate vs ctr	>2	16	rs4185743	50384244	11	9	Bbx:I	0.040178	0.404952	0.075805	0.210256	6.80428	0.320393	0.76801	0.701388	0.033466	0.174909	0.016551	0.007069	0.659865	0.321203	0.014718	0.031818	0.027319	0.193716	0.0134	0.019003	0.955922	0.336312	0.030747	0.010118	0.022476	0.016371	0.202134	0.0008	0.036809	1.09097	0.676421	0.036279	0.041362	0.02757	0.398766	0.024176	0.570439	2.57818	0.004952
AE49	sugg	AW	ate vs ctr	>2	16	rs4185800	50403705	11	11	Bbx:I	0.074371	0.409503	0.156721	0.053279	6.21531	0.670096	0.364591	0.328912	0.063396	0.238786	0.036773	0.03625	0.846451	0.391112	0.001667	0.008309	0.052269	0.255203	0.028089	0.037724	1.1757	0.441208	0.028009	0.018976	0.176685	0.167839	0.037029	0.192016	0.32979	1.21333	1.18364	0.120909	0.120333	0.152819	0.665273	0.096533	0.688929	2.39329	0.126201
AE49	sugg	AW	ate vs ctr	>2	16	rs4185871	50449802	11	11	LOC100043414:I	0.074371	0.409503	0.156721	0.053279	6.21531	0.670096	0.364591	0.328912	0.061876	0.238786	0.036773	0.03625	0.854136	0.391112	0.001667	0.008309	0.051073	0.255203	0.028089	0.037724	1.1867	0.441208	0.028009	0.018976	0.176685	0.167839	0.037029	0.192016	0.32979	1.21333	1.18364	0.120909	0.120333	0.152819	0.665273	0.096533	0.688929	2.39329	0.126201
AE50	sugg	ECG_PR	iso10 vs ctr	>2	16	rs6323896	53279600	12	8	=	0.055382	0.015506	0.042011	0.195902	0.366204	0.359359	0.098612	0.129193	0.021258	0.113514	0.082432	0.094302	0.459397	0.097929	0.112743	0.258653	0.015476	0.11123	0.074946	0.073918	0.519942	0.143746	0.088647	0.227375	0.44982	0.707144	0.564817	0.578675	0.643276	0.584625	0.14099	0.229165	0.226613	0.986913	0.851	0.99306	0.39354	0.082611	0.334
AE51	sugg	AW	ate vs ctr	>2	17	rs33151085	58452287	17	5	Cntnap5c:I	1.45657	3.56595	3.06994	1.89411	6.68588	1.04736	0.15918	0.098347	0.995277	1.28141	1.30439	0.728626	0.34293	0.818016	0.521872	0.594488	1.03585	1.40537	1.45853	0.805955	0.57476	0.856837	0.424879	0.502416	1.12116	0.634184	1.16498	1.15859	0.767679	0.713121	0.549146	0.036838	0.070487	1.30673	3.46871	1.52504	1.76332	2.83344	0.786857
AE51	sugg	AW	ate vs ctr	>2	17	rs33384800	58507355	5	17	Cntnap5c:I	1.45657	3.56595	3.06994	1.94479	6.68588	1.04736	0.15918	0.098347	1.01301	1.28141	1.30439	0.709675	0.342397	0.818016	0.521872	0.594488	1.05222	1.40537	1.45853	0.788014	0.573741	0.856837	0.424879	0.502416	1.11512	0.634184	1.16498	1.15859	0.747222	0.713121	0.531644	0.03651	0.070487	1.30673	3.46127	1.51473	1.78145	2.83344	0.786857
AE51	sugg	AW	ate vs ctr	>2	17	rs33571391	58954313	17	5	=	1.45657	3.56595	3.06994	1.89411	6.68588	1.04736	0.15918	0.098347	0.995277	1.28141	1.30439	0.728626	0.34293	0.818016	0.521872	0.594488	1.03585	1.40537	1.45853	0.805955	0.57476	0.856837	0.424879	0.502416	1.12116	0.634184	1.16498	1.15859	0.767679	0.713121	0.549146	0.036838	0.070487	1.30673	3.46871	1.52504	1.76332	2.83344	0.786857
AE51	sugg	AW	ate vs ctr	>2	17	rs33582064	58959134	17	5	=	1.45657	3.56595	3.06994	1.89411	6.68588	1.04736	0.15918	0.098347	0.995277	1.28141	1.30439	0.728626	0.34293	0.818016	0.521872	0.594488	1.03585	1.40537	1.45853	0.805955	0.57476	0.856837	0.424879	0.502416	1.12116	0.634184	1.16498	1.15859	0.767679	0.713121	0.549146	0.036838	0.070487	1.30673	3.46871	1.52504	1.76332	2.83344	0.786857
AE51	sugg	AW	ate vs ctr	>2	17	rs4231577	59018619	15	5	2610034M16Rik:I	1.29821	3.41268	3.0424	1.79145	6.32777	0.904716	0.217521	0.155725	0.858884	1.18245	1.20385	0.653844	0.457882	0.742215	0.382359	0.450398	0.89538	1.30035	1.35425	0.725726	0.689734	0.776517	0.299908	0.370981	1.14202	0.567408	1.0587	1.07937	0.698782	0.668147	0.435123	0.005389	0.023298	1.16555	3.08722	1.48771	1.61445	2.48966	0.680365
AE51	sugg	AW	ate vs ctr	>2	17	rs33119698	59030615	17	5	2610034M16Rik:I	1.45657	3.56595	3.06994	1.89411	6.68588	1.04736	0.15918	0.098347	0.995277	1.28141	1.30439	0.728626	0.34293	0.818016	0.521872	0.594488	1.03585	1.40537	1.45853	0.805955	0.57476	0.856837	0.424879	0.502416	1.12116	0.634184	1.16498	1.15859	0.767679	0.713121	0.549146	0.036838	0.070487	1.30673	3.46871	1.52504	1.76332	2.83344	0.786857
AE52	sugg	SBP	iso10 vs ate; ate vs iso10	<2	17	rs33503727	78682227	9	13	Crim1:I	0.152345	0.24573	0.297144	0.274825	0.041939	0.061498	0.145687	0.118164	0.228208	0.228185	0.121056	0.256325	0.151298	0.056819	0.018277	0.012878	0.224294	0.233235	0.131438	0.262157	0.104749	0.059207	0.039211	0.005275	0.0155	0.073178	0.037829	0.033862	0.074607	0.131449	0.12038	0.017666	0.048097	0.148851	0.398545	0.425113	0.349688	0.180019	0.02204
AE11	SIGNIF	SBP	iso10 vs ate; ate vs iso10	<2	18	rs29767309	68266538	7	15	D18Ertd653e:I	0.293076	0.160138	0.26769	0.356379	0.363189	0.302289	0.0461	0.037109	0.613131	0.750208	0.481222	0.538205	0.000511	0.221645	0.194568	0.210732	0.596986	0.710418	0.471643	0.534684	0.016489	0.183111	0.168531	0.187472	0.574415	0.756444	0.633621	0.577994	0.658962	0.369123	0.063556	0.261422	0.298931	0.212553	0.203879	0.157003	0.05086	0.170577	0.48631
AE11	SIGNIF	SBP	iso10 vs ate; ate vs iso10	<2	18	rs29628938	68314407	7	15	D18Ertd653e:I	0.293076	0.160138	0.26769	0.356379	0.363189	0.302289	0.0461	0.037109	0.613131	0.750208	0.481222	0.538205	0.000511	0.221645	0.194568	0.210732	0.596986	0.710418	0.471643	0.534684	0.016489	0.183111	0.168531	0.187472	0.574415	0.756444	0.633621	0.577994	0.658962	0.369123	0.063556	0.261422	0.298931	0.212553	0.203879	0.157003	0.05086	0.170577	0.48631
AE53	sugg	ECG_QTc	iso10 vs ate	>2	18	rs6161154	71609676	9	11	Dcc:I	0.387539	0.438235	0.366988	0.452537	0.25855	0.014373	0.120378	0.089465	0.016057	0.101887	0.224725	0.235904	0.49304	0.276993	0.778311	0.659259	0.031434	0.124241	0.249054	0.253741	0.518196	0.248761	0.726856	0.630504	0.298394	0.097975	0.412156	0.220728	0.101932	1.09933	0.704083	0.027814	0.018438	0.399177	0.221882	0.189839	0.524929	0.571284	0.629184
AE54	sugg	SBP	iso10 vs ctr	>2	19	rs30454948	27017236	16	6	=	0.508863	0.760746	1.20802	0.415926	0.285024	0.514597	0.188278	0.191671	0.568435	0.852156	0.886783	0.391696	0.344791	0.747204	0.414907	0.385303	0.572119	0.855664	0.93964	0.401359	0.373211	0.736757	0.387448	0.367334	0.710607	0.497265	0.548896	0.766771	0.581187	0.034211	0.035835	0.037767	0.041467	0.199802	0.482364	0.443336	0.031602	0.71474	0.857872
AE54	sugg	SBP	iso10 vs ctr	>2	19	rs30959051	27019681	16	6	=	0.508863	0.760746	1.20802	0.415926	0.285024	0.514597	0.188278	0.191671	0.568435	0.852156	0.886783	0.391696	0.344791	0.747204	0.414907	0.385303	0.572119	0.855664	0.93964	0.401359	0.373211	0.736757	0.387448	0.367334	0.710607	0.497265	0.548896	0.766771	0.581187	0.034211	0.035835	0.037767	0.041467	0.199802	0.482364	0.443336	0.031602	0.71474	0.857872
AE54	sugg	SBP	iso10 vs ctr	>2	19	rs30561916	27020472	16	6	=	0.508863	0.760746	1.20802	0.415926	0.285024	0.514597	0.188278	0.191671	0.568435	0.852156	0.886783	0.391696	0.344791	0.747204	0.414907	0.385303	0.572119	0.855664	0.93964	0.401359	0.373211	0.736757	0.387448	0.367334	0.710607	0.497265	0.548896	0.766771	0.581187	0.034211	0.035835	0.037767	0.041467	0.199802	0.482364	0.443336	0.031602	0.71474	0.857872
AE54	sugg	SBP	iso10 vs ctr	>2	19	rs30704865	27028625	16	6	=	0.508863	0.760746	1.20802	0.415926	0.285024	0.514597	0.188278	0.191671	0.568435	0.852156	0.886783	0.391696	0.344791	0.747204	0.414907	0.385303	0.572119	0.855664	0.93964	0.401359	0.373211	0.736757	0.387448	0.367334	0.710607	0.497265	0.548896	0.766771	0.581187	0.034211	0.035835	0.037767	0.041467	0.199802	0.482364	0.443336	0.031602	0.71474	0.857872
AE54	sugg	SBP	iso10 vs ctr	>2	19	rs30818051	27028769	6	15	=	0.636797	0.881146	1.42218	0.463755	0.232227	0.601434	0.260203	0.262795	0.65276	0.977133	1.00511	0.419172	0.316254	0.915424	0.560094	0.498114	0.664372	0.983468	1.07205	0.430793	0.329711	0.900374	0.538099	0.487845	1.07746	0.632625	0.751528	1.0152	0.748458	0.023065	0.009454	0.055172	0.060417	0.21249	0.461065	0.407704	0.000613	0.631767	0.974829
AE54	sugg	SBP	iso10 vs ctr	>2	19	rs30693359	27028949	16	6	=	0.508863	0.760746	1.20802	0.415926	0.285024	0.514597	0.188278	0.191671	0.568435	0.852156	0.886783	0.391696	0.344791	0.747204	0.414907	0.385303	0.572119	0.855664	0.93964	0.401359	0.373211	0.736757	0.387448	0.367334	0.710607	0.497265	0.548896	0.766771	0.581187	0.034211	0.035835	0.037767	0.041467	0.199802	0.482364	0.443336	0.031602	0.71474	0.857872
AE54	sugg	SBP	iso10 vs ctr	>2	19	rs30852715	27051891	6	16	=	0.508863	0.760746	1.20802	0.415926	0.285005	0.514597	0.188278	0.191671	0.568435	0.852156	0.886783	0.391696	0.344791	0.758571	0.415397	0.385303	0.572119	0.855664	0.93964	0.401359	0.373211	0.748197	0.38812	0.367334	0.710607	0.497265	0.549678	0.766771	0.581187	0.034389	0.035835	0.037767	0.041467	0.199802	0.482364	0.441055	0.031602	0.71474	0.857872
AE54	sugg	SBP	iso10 vs ctr	>2	19	rs30894961	27052280	16	6	=	0.508863	0.760746	1.20802	0.415926	0.285024	0.514597	0.188278	0.191671	0.568435	0.852156	0.886783	0.391696	0.344791	0.747204	0.414907	0.385303	0.572119	0.855664	0.93964	0.401359	0.373211	0.736757	0.387448	0.367334	0.710607	0.497265	0.548896	0.766771	0.581187	0.034211	0.035835	0.037767	0.041467	0.199802	0.482364	0.443336	0.031602	0.71474	0.857872
AE55	sugg	SBP	ate vs iso10	<2	19	rs30396005	41381490	7	15	Pik3ap1:I	0.067236	0.021827	0.011839	0.032323	0.38591	0.059913	0.158978	0.148558	0.085973	0.132325	0.017643	0.128408	0.183103	0.51951	0.678884	0.590886	0.084428	0.123938	0.019834	0.123058	0.190674	0.467308	0.620081	0.550584	0.222183	0.045668	0.086221	0.124827	0.179156	0.487218	0.05977	0.555997	0.587163	0.09964	0.049767	0.205461	0.193506	0.105722	0.213355
AE55	sugg	SBP	ate vs iso10	<2	19	rs30663218	41399377	14	7	Pik3ap1:I	0.150568	0.034313	0.07636	0.00352	0.477278	0.007253	0.244988	0.23188	0.146048	0.202132	0.030791	0.096028	0.203859	0.682769	0.922966	0.775184	0.148299	0.193639	0.030664	0.089844	0.231658	0.618645	0.867983	0.74291	0.121563	0.128997	0.002052	0.034421	0.091722	0.459107	0.096314	0.595429	0.636393	0.110964	0.039107	0.163449	0.135559	0.166702	0.144219
AE55	sugg	SBP	ate vs iso10	<2	19	rs30418711	41833847	7	15	=	0.067236	0.021827	0.011839	0.032323	0.38591	0.059913	0.158978	0.148558	0.085973	0.132325	0.017643	0.128408	0.183103	0.51951	0.678884	0.590886	0.084428	0.123938	0.019834	0.123058	0.190674	0.467308	0.620081	0.550584	0.222183	0.045668	0.086221	0.124827	0.179156	0.487218	0.05977	0.555997	0.587163	0.09964	0.049767	0.205461	0.193506	0.105722	0.213355
AE55	sugg	SBP	ate vs iso10	<2	19	rs30418272	41833902	15	7	=	0.067236	0.020527	0.011839	0.032323	0.38591	0.059913	0.158978	0.148558	0.085973	0.132325	0.017643	0.128408	0.183103	0.51951	0.678884	0.590886	0.084428	0.123938	0.019834	0.123058	0.190674	0.467308	0.620081	0.550584	0.222183	0.045681	0.086221	0.124827	0.179156	0.488398	0.05977	0.555997	0.594392	0.09964	0.049767	0.205461	0.193506	0.105722	0.213355
AE55	sugg	SBP	ate vs iso10	<2	19	rs31256455	41987015	7	15	Pgam1:I	0.067236	0.021827	0.011839	0.032323	0.38591	0.059913	0.158978	0.148558	0.085973	0.132325	0.017643	0.128408	0.183103	0.51951	0.678884	0.590886	0.084428	0.123938	0.019834	0.123058	0.190674	0.467308	0.620081	0.550584	0.222183	0.045668	0.086221	0.124827	0.179156	0.487218	0.05977	0.555997	0.587163	0.09964	0.049767	0.205461	0.193506	0.105722	0.213355
AE55	sugg	SBP	ate vs iso10	<2	19	rs31102642	41987568	15	7	Pgam1:I	0.067236	0.020527	0.011839	0.032323	0.38591	0.059913	0.158978	0.148558	0.085973	0.132325	0.017643	0.128408	0.183103	0.51951	0.678884	0.590886	0.084428	0.123938	0.019834	0.123058	0.190674	0.467308	0.620081	0.550584	0.222183	0.045681	0.086221	0.124827	0.179156	0.488398	0.05977	0.555997	0.594392	0.09964	0.049767	0.205461	0.193506	0.105722	0.213355
AE55	sugg	SBP	ate vs iso10	<2	19	rs3691590	42005478	7	15	Exosc1:I	0.067236	0.021827	0.011839	0.032323	0.38591	0.059913	0.158978	0.148558	0.085973	0.132325	0.017643	0.128408	0.183103	0.51951	0.678884	0.590886	0.084428	0.123938	0.019834	0.123058	0.190674	0.467308	0.620081	0.550584	0.222183	0.045668	0.086221	0.124827	0.179156	0.487218	0.05977	0.555997	0.587163	0.09964	0.049767	0.205461	0.193506	0.105722	0.213355
AE55	sugg	SBP	ate vs iso10	<2	19	rs31039780	42153811	15	7	BC023055:L	0.067236	0.020527	0.011839	0.032323	0.38591	0.059913	0.158978	0.148558	0.085973	0.132325	0.017643	0.128408	0.183103	0.51951	0.678884	0.590886	0.084428	0.123938	0.019834	0.123058	0.190674	0.467308	0.620081	0.550584	0.222183	0.045681	0.086221	0.124827	0.179156	0.488398	0.05977	0.555997	0.594392	0.09964	0.049767	0.205461	0.193506	0.105722	0.213355
AE56	sugg	SBP	iso10 vs ate	<2	19	rs13483686	56160641	12	8	=	0.096134	0.013892	0.04269	0.08336	0.150795	0.089064	0.056428	0.050078	0.523379	0.537777	0.361673	0.441141	0.150132	0.127489	0.244423	0.232978	0.495105	0.499265	0.340046	0.417386	0.139722	0.120508	0.228466	0.219758	0.40483	0.596252	0.437187	0.523248	0.435022	0.477601	0.007615	0.388268	0.42117	0.431115	0.292614	0.476445	0.264237	0.079736	0.182991
AE56	sugg	SBP	iso10 vs ate; ate vs iso10	<2	19	rs31041772	56302906	12	9	=	0.185654	0.178008	0.175804	0.178084	0.020072	0.035162	0.049254	0.058462	0.683483	0.885905	0.596519	0.59369	0.125427	0.356557	0.250932	0.248681	0.650908	0.834725	0.572377	0.568994	0.138053	0.344967	0.233671	0.234755	0.482753	0.594518	0.590521	0.581114	0.483911	0.112397	0.135488	0.289662	0.324425	0.220436	0.121315	0.27314	0.16676	0.082028	0.104131
AE56	sugg	SBP	iso10 vs ate; ate vs iso10	<2	19	rs30396265	56303819	13	9	=	0.230726	0.153913	0.142164	0.135611	0.117712	0.045933	0.166821	0.176996	0.682288	0.755494	0.519669	0.54302	0.001232	0.334003	0.331257	0.322503	0.655047	0.708211	0.497642	0.517161	0.000699	0.326368	0.321055	0.315785	0.497126	0.732376	0.633116	0.629405	0.555217	0.32078	0.081987	0.420726	0.458019	0.278097	0.182874	0.364404	0.280296	0.047421	0.05598
AE56	sugg	SBP	iso10 vs ate; ate vs iso10	<2	19	rs30841445	56337793	13	9	=	0.230726	0.153913	0.142164	0.135611	0.117712	0.045933	0.166821	0.176996	0.682288	0.755494	0.519669	0.54302	0.001232	0.334003	0.331257	0.322503	0.655047	0.708211	0.497642	0.517161	0.000699	0.326368	0.321055	0.315785	0.497126	0.732376	0.633116	0.629405	0.555217	0.32078	0.081987	0.420726	0.458019	0.278097	0.182874	0.364404	0.280296	0.047421	0.05598
AE56	sugg	SBP	iso10 vs ate; ate vs iso10	<2	19	rs31131852	56338004	8	13	=	0.203718	0.120064	0.123987	0.103229	0.173227	0.024003	0.168434	0.209393	0.684506	0.792351	0.495773	0.520357	0.017401	0.348	0.323914	0.311393	0.648692	0.741653	0.466791	0.490734	0.012363	0.338716	0.318073	0.308241	0.479584	0.690388	0.589322	0.590403	0.53614	0.299328	0.033585	0.351853	0.382692	0.258235	0.213931	0.368703	0.35581	0.014997	0.043054
AE56	sugg	SBP	iso10 vs ate	<2	19	rs31087136	56360216	9	12	=	0.3778	0.258269	0.253029	0.197167	0.198414	0.118073	0.284007	0.296728	0.856048	1.00973	0.667663	0.610899	0.027741	0.50767	0.541633	0.496541	0.836915	0.958406	0.649502	0.586661	0.040824	0.495405	0.544308	0.503599	0.902597	1.03563	1.00666	0.978272	0.826094	0.30125	0.131768	0.471611	0.50742	0.24997	0.195417	0.430606	0.370096	0.019729	0.007277
AE56	sugg	SBP	iso10 vs ate; ate vs iso10	<2	19	rs31017311	56364335	9	13	Habp2:I	0.230726	0.153913	0.142164	0.135594	0.117712	0.045933	0.166821	0.176996	0.682288	0.796123	0.519669	0.54302	0.001232	0.334003	0.331257	0.322503	0.655047	0.750932	0.497642	0.517161	0.000699	0.326368	0.321055	0.315785	0.510842	0.732376	0.633116	0.629405	0.541566	0.32078	0.081055	0.414582	0.458019	0.278097	0.182256	0.364404	0.279279	0.047421	0.05598
AE56	sugg	SBP	iso10 vs ate	<2	19	rs30950995	56385767	12	9	Habp2:I	0.3778	0.258269	0.258488	0.197167	0.198414	0.118073	0.284007	0.296728	0.856048	1.00973	0.667663	0.610899	0.027741	0.50767	0.541633	0.496541	0.836915	0.958406	0.649502	0.586661	0.040824	0.495405	0.544308	0.503599	0.902597	1.03563	1.00666	0.978272	0.826094	0.30125	0.131768	0.471611	0.50742	0.24997	0.195417	0.430606	0.370096	0.019729	0.007277
AE56	sugg	SBP	iso10 vs ate	<2	19	rs6355398	56457053	12	8	Nrap:I	0.096134	0.013892	0.04269	0.08336	0.150795	0.089064	0.056428	0.050078	0.523379	0.537777	0.361673	0.441141	0.150132	0.127489	0.244423	0.232978	0.495105	0.499265	0.340046	0.417386	0.139722	0.120508	0.228466	0.219758	0.40483	0.596252	0.437187	0.523248	0.435022	0.477601	0.007615	0.388268	0.42117	0.431115	0.292614	0.476445	0.264237	0.079736	0.182991
AE57	sugg	AWI	iso10 vs ctr	<2	19	rs3712604	60010466	12	8	Rab11fip2:I	0.282254	0.368474	0.366279	0.093732	0.097987	1.67325	0.987001	1.08474	0.424569	0.393152	0.385675	0.009758	0.307624	1.34614	2.33677	1.81883	0.423561	0.394399	0.399814	0.003009	0.279198	1.43667	2.31784	1.84821	0.003471	0.077226	0.042255	0.085818	0.033142	0.51827	0.173274	0.184909	0.177629	0.433237	0.907168	0.407908	0.17602	1.00881	6.7382
AE57	sugg	AWI	iso10 vs ctr	<2	19	rs30313450	60042465	9	11	=	0.491084	0.575662	0.675741	0.008864	0.089628	1.77558	1.10271	1.13927	0.483277	0.383588	0.476613	0.018599	0.447269	1.32642	2.75382	2.13532	0.492398	0.396384	0.510096	0.016977	0.409413	1.41429	2.71222	2.15703	0.044368	0.133201	0.001073	0.169185	0.071312	0.5433	0.147359	0.236026	0.232475	0.655802	1.26069	0.544541	0.076186	0.984465	6.6156
[truncated: 162 more columns]
