# Supplementary material for: Mapping Genetic Variants Associated with Beta-Adrenergic Responses in Inbred Mice
Source: PLoS One. 2012 Jul 31;7(7):e41032. doi: 10.1371/journal.pone.0041032 (PMC3409184; doi:10.1371/journal.pone.0041032)
Supplement: Table S5 — Log2 normalized cardiac expression values of the main candidate genes. Transcripts were measured by microarrays in the cardiac ventricles of untreated C57BL/6J and KK/HlJ mice (n = 4 per strain). Values were calculated from Affymetrix CEL files using the RMA algorithm. Data are listed by probeset and are ranked by locus. (XLS) [file pone.0041032.s016.xls]

## Sheet: microarrays
Table S5
Loc	Chr	Strand	Start	Stop	B6_ctr_168	B6_ctr_183	B6_ctr_185	B6_ctr_187	KK_ctr_2107	KK_ctr_2121	KK_ctr_2122	KK_ctr_2124	average B6 CTR	average KK CTR	Gene Symbol	Gene Description	Gene Accession	mRNA Accession	Affy Probe AEt ID
1	chr5	+	89363772	89664802	6.66617	6.73431	6.42357	6.59143	6.68436	6.87921	6.99239	6.77361	6.60387	6.83239	Slc4a4	solute carrier family 4 (anion exchanger), member 4	NM_018760	NM_018760	10523021
1	chr5	-	89846547	89886790	3.68527	2.32586	2.41246	2.49477	2.7454	2.50904	2.21775	2.71639	2.72959	2.54715	Gc	group specific component	NM_008096	NM_008096	10531149
1	chr5	-	89928147	89929004	2.26533	2.40617	2.27085	2.26237	2.41652	2.25454	2.04061	2.33602	2.30118	2.26192	Gm6366	predicted gene 6366	XR_030755	XR_030755	10531163
1	chr5	+	89955980	90012765	2.15119	2.1115	2.18882	2.22108	2.45018	2.48762	2.13484	2.24462	2.16815	2.32931	Npffr2	neuropeptide FF receptor 2	NM_133192	NM_133192	10523048
1	chr5	+	89966114	89967500	1.84091	1.93726	1.99352	1.91506	1.80044	1.8563	1.90926	2.07022	1.92169	1.90906	---	---	---	BC085272	10523056
1	chr5	-	90106389	90120490	4.01753	4.14062	3.77878	4.28191	4.24865	3.66331	4.18605	4.03388	4.05471	4.03297	Adamts3	a disintegrin-like and metallopeptidaAE (reprolysin type) with thrombospondin type 1 motif, 3	NM_001081401	NM_001081401	10531166
1	chr5	-	90122064	90122227	3.75077	4.38875	3.69921	4.16441	3.33522	3.62223	3.72387	3.73545	4.00078	3.60419	Adamts3	a disintegrin-like and metallopeptidaAE (reprolysin type) with thrombospondin type 1 motif, 3	NM_001081401	NM_001081401	10531173
1	chr5	-	90123775	90123855	3.13174	3.43012	2.81421	3.54039	2.92901	3.1323	2.96462	2.76878	3.22912	2.94868	Adamts3	a disintegrin-like and metallopeptidaAE (reprolysin type) with thrombospondin type 1 motif, 3	NM_001081401	NM_001081401	10531175
1	chr5	-	90127229	90127352	4.80475	5.54616	5.03322	5.47176	4.49791	4.87894	4.80587	4.54654	5.21397	4.68231	Adamts3	a disintegrin-like and metallopeptidaAE (reprolysin type) with thrombospondin type 1 motif, 3	NM_001081401	NM_001081401	10531177
1	chr5	-	90129432	90129565	3.26308	3.32137	2.91002	2.69531	2.75588	3.04164	3.15557	2.88227	3.04745	2.95884	Adamts3	a disintegrin-like and metallopeptidaAE (reprolysin type) with thrombospondin type 1 motif, 3	NM_001081401	NM_001081401	10531179
1	chr5	-	90130664	90130839	4.65028	4.81281	4.61049	5.08821	4.91782	4.58162	4.27496	4.81831	4.79045	4.64818	Adamts3	a disintegrin-like and metallopeptidaAE (reprolysin type) with thrombospondin type 1 motif, 3	NM_001081401	NM_001081401	10531181
1	chr5	-	90131959	90132104	3.5153	3.9392	3.60545	3.55046	3.09515	2.97539	3.10965	2.81094	3.6526	2.99778	Adamts3	a disintegrin-like and metallopeptidaAE (reprolysin type) with thrombospondin type 1 motif, 3	NM_001081401	NM_001081401	10531183
1	chr5	-	90134216	90134329	4.31007	4.27744	4.0606	4.4827	4.2134	4.51325	3.84565	4.02986	4.2827	4.15054	Adamts3	a disintegrin-like and metallopeptidaAE (reprolysin type) with thrombospondin type 1 motif, 3	NM_001081401	NM_001081401	10531185
1	chr5	-	90135675	90135807	5.03821	5.19345	5.18776	5.34832	4.89501	4.83164	4.74251	4.55722	5.19194	4.75659	Adamts3	a disintegrin-like and metallopeptidaAE (reprolysin type) with thrombospondin type 1 motif, 3	NM_001081401	NM_001081401	10531187
1	chr5	-	90136330	90136473	4.63967	4.56945	4.48419	4.84133	4.3944	4.49913	4.10868	4.53352	4.63366	4.38393	Adamts3	a disintegrin-like and metallopeptidaAE (reprolysin type) with thrombospondin type 1 motif, 3	NM_001081401	NM_001081401	10531189
1	chr5	-	90136827	90136932	4.6709	5.03114	4.64654	4.93965	4.67412	4.53658	4.19661	4.42414	4.82206	4.45786	Adamts3	a disintegrin-like and metallopeptidaAE (reprolysin type) with thrombospondin type 1 motif, 3	NM_001081401	NM_001081401	10531191
1	chr5	-	90137636	90137792	5.49382	5.63294	5.50377	5.68684	5.50431	5.48813	5.24988	5.65302	5.57934	5.47383	Adamts3	a disintegrin-like and metallopeptidaAE (reprolysin type) with thrombospondin type 1 motif, 3	NM_001081401	NM_001081401	10531193
1	chr5	-	90139682	90139765	3.26313	3.98413	3.64168	3.72143	3.48905	3.23413	3.45668	3.34498	3.65259	3.38121	Adamts3	a disintegrin-like and metallopeptidaAE (reprolysin type) with thrombospondin type 1 motif, 3	NM_001081401	NM_001081401	10531195
1	chr5	-	90150679	90150878	4.65861	4.78696	4.59775	4.76264	4.57931	4.3749	4.65238	4.67652	4.70149	4.57078	Adamts3	a disintegrin-like and metallopeptidaAE (reprolysin type) with thrombospondin type 1 motif, 3	NM_001081401	NM_001081401	10531197
1	chr5	-	90192482	90192784	2.16368	2.17866	2.5056	2.29968	2.26628	2.56132	2.33771	2.39063	2.2869	2.38899	D130050E23Rik	RIKEN cDNA D130050E23 gene	AK051463	AK051463	10531199
1	chr5	-	90204310	90204466	2.72389	3.38758	2.75048	3.07146	2.67045	2.60965	2.55554	3.00543	2.98335	2.71027	Adamts3	a disintegrin-like and metallopeptidaAE (reprolysin type) with thrombospondin type 1 motif, 3	NM_001081401	NM_001081401	10531201
1	chr5	-	90263257	90312359	4.00954	3.94748	3.87694	4.36449	3.55245	3.68818	3.31902	3.55167	4.04961	3.52783	Adamts3	a disintegrin-like and metallopeptidaAE (reprolysin type) with thrombospondin type 1 motif, 3	NM_001081401	NM_001081401	10531203
1	chr5	-	90643753	90652989	6.82566	6.70883	6.83237	6.93459	7.54366	7.57607	7.46377	7.41519	6.82536	7.49967	Cox18	COX18 cytochrome c oxidaAE asAEmbly homolog (S. cerevisiae)	NM_001033310	NM_001033310	10531208
1	chr5	-	90656191	90795590	8.51747	8.52906	8.34807	8.35114	8.31838	8.37542	8.17448	8.12786	8.43644	8.24904	Ankrd17	ankyrin repeat domain 17	NM_030886	NM_030886	10531215
1	chr5	-	90759932	90760387	3.52425	3.65132	3.91939	3.89087	3.56573	3.56025	3.68723	3.87793	3.74646	3.67278	AU017193	expresAEd AEquence AU017193	ENSMUST00000088076	ENSMUST00000088076	10531256
1	chr5	+	90796230	90797513	2.32219	2.29322	2.18726	2.45247	2.58339	2.33935	2.74691	2.30022	2.31378	2.49247	Gm9958	predicted gene 9958	ENSMUST00000068250	ENSMUST00000068250	10523060
1	chr5	-	90807679	90807894	2.43882	2.52015	2.50489	2.20502	2.7361	2.49386	2.29662	2.52855	2.41722	2.51378	Gm10426	predicted gene 10426	ENSMUST00000101038	ENSMUST00000101038	10531259
1	chr5	+	90889927	90905628	7.0911	2.40813	2.80741	2.282	4.92692	2.77889	2.05066	2.38029	3.64716	3.03419	Alb	albumin	NM_009654	NM_009654	10523062
1	chr5	+	90919763	90937933	2.12049	2.28151	2.2842	2.18082	2.72015	2.28179	2.25039	2.27846	2.21675	2.3827	Afp	alpha fetoprotein	NM_007423	NM_007423	10523078
1	chr5	+	90947975	90982570	2.35324	2.29586	2.19876	2.26321	2.2353	2.33273	2.1416	2.46467	2.27777	2.29357	Afm	afamin	NM_145146	NM_145146	10523095
1	chr5	+	90990244	91007024	2.26067	2.09075	2.32627	2.35614	2.22094	2.35011	2.18107	2.34305	2.25846	2.27379	LOC622307	similar to LOC360919 protein	ENSMUST00000094615	ENSMUST00000094615	10523111
1	chr5	-	91032102	91069655	2.21154	2.06303	2.07707	2.22331	2.10851	2.33996	2.2618	2.1417	2.14374	2.21299	Rassf6	Ras association (RalGDS/AF-6) domain family member 6	NM_028478	NM_028478	10531261
1	chr5	+	91188325	91190651	2.68077	2.44062	2.40211	2.43813	2.41655	2.35127	2.45903	2.53549	2.49041	2.44059	Cxcl5	chemokine (C-X-C motif) ligand 5	NM_009141	NM_009141	10523120
1	chr5	+	91197544	91199089	5.33703	4.87576	4.71244	4.69853	6.06845	5.99105	6.82664	6.23301	4.90594	6.27979	Ppbp	pro-platelet basic protein	NM_023785	NM_023785	10523128
1	chr5	+	91201529	91202409	5.50484	5.24893	5.30511	5.67835	5.60474	5.54381	5.66852	5.69285	5.43431	5.62748	Pf4	platelet factor 4	NM_019932	NM_019932	10523134
1	chr5	+	91215129	91217119	2.51565	2.62142	2.56386	2.66488	2.68469	2.53064	2.68428	2.62341	2.59145	2.63076	Cxcl3	chemokine (C-X-C motif) ligand 3	NM_203320	NM_203320	10523138
1	chr5	+	91223560	91232093	2.05917	2.13907	2.39832	2.27505	2.35349	2.27043	2.21391	2.1997	2.2179	2.25938	Cxcl15	chemokine (C-X-C motif) ligand 15	NM_011339	NM_011339	10523145
1	chr5	+	91320336	91322141	4.18832	3.85669	3.80451	4.14306	4.05981	3.97575	3.85669	4.16327	3.99815	4.01388	Cxcl1	chemokine (C-X-C motif) ligand 1	NM_008176	NM_008176	10523151
1	chr5	+	91332925	91334964	1.94181	2.2351	2.24331	2.08208	2.41568	2.52327	2.01599	2.23273	2.12557	2.29692	Cxcl2	chemokine (C-X-C motif) ligand 2	NM_009140	NM_009140	10523156
1	chr5	+	91375814	91450389	4.51764	4.82082	4.78303	4.5339	4.43426	4.53132	4.94607	4.38837	4.66385	4.57501	Mthfd2l	methylenetetrahydrofolate dehydrogenaAE (NADP+ dependent) 2-like	NM_026788	NM_026788	10523161
1	chr5	+	91456490	91464243	2.63191	2.61122	3.00672	2.65506	2.65633	2.32153	2.67827	2.60529	2.72623	2.56535	Epgn	epithelial mitogen	NM_053087	NM_053087	10523168
1	chr5	+	91503648	91522672	2.5657	2.12754	2.3396	2.17292	2.35969	2.36001	2.28183	2.36153	2.30144	2.34076	Ereg	epiregulin	NM_007950	NM_007950	10523175
2	chr5	+	97693847	97694743	10.199	10.3425	10.2681	10.3933	10.1136	10.3261	10.1246	10.2597	10.3007	10.206	Slc25a5	solute carrier family 25 (mitochondrial carrier, adenine nucleotide translocator), member 5	NM_007451	NM_007451	10523479
2	chr5	-	97811228	97821349	2.44206	2.57138	2.36981	2.56228	2.78833	2.32375	2.19741	2.41811	2.48638	2.4319	Ard1b	ARD1 homolog B (S. cerevisiae)	NM_001033191	NM_001033191	10531553
2	chr5	-	97884142	97886040	2.22931	2.06665	2.40822	2.28548	2.24756	2.24028	2.03511	2.22656	2.24742	2.18738	Gk2	glycerol kinaAE 2	NM_010294	NM_010294	10531556
2	chr5	-	98313707	98459981	8.91451	9.00028	8.85548	8.98587	8.39178	8.38035	8.4723	8.586	8.93904	8.45761	Antxr2	anthrax toxin receptor 2	NM_133738	NM_133738	10531560
2	chr5	-	98504227	98504940	9.50435	9.52833	9.56654	9.53673	9.48255	9.42752	9.54872	9.53821	9.53399	9.49925	Hmgb1	high mobility group box 1	NM_010439	NM_010439	10531579
2	chr5	+	98582200	98583195	2.79004	2.84202	2.76846	3.06382	2.93439	3.04252	2.88692	3.21772	2.86609	3.02039	---	---	---	GENSCAN00000044201	10523481
2	chr5	+	98609888	98618010	3.56872	3.23775	2.99627	2.99065	2.68702	2.98128	2.97152	3.07988	3.19835	2.92992	Prdm8	PR domain containing 8	NM_029947	NM_029947	10523483
2	chr5	-	98613188	98615003	2.99109	3.20208	3.06855	3.0388	3.28758	3.01838	3.00028	2.95296	3.07513	3.0648	Prdm8	PR domain containing 8	NM_029947	NM_029947	10531581
2	chr5	+	98683203	98706052	3.28089	3.46818	3.61847	3.57267	3.39211	3.18494	3.0714	3.79759	3.48505	3.36151	Fgf5	fibroblast growth factor 5	NM_010203	NM_010203	10523490
2	chr5	+	98758323	99231038	2.12355	2.22858	2.3449	2.23712	2.15821	2.39414	2.50651	2.23405	2.23354	2.32323	1700007G11Rik	RIKEN cDNA 1700007G11 gene	BC049770	BC049770	10523497
2	chr5	-	98982648	98995943	2.27627	2.44166	2.22472	2.45786	2.619	2.25144	2.22391	2.40208	2.35013	2.37411	1700010H22Rik	RIKEN cDNA 1700010H22 gene	ENSMUST00000112955	ENSMUST00000112955	10531583
2	chr5	+	99283458	99309147	3.98298	3.90263	3.77154	3.83199	4.28118	3.88098	3.79796	4.14013	3.87228	4.02506	Bmp3	bone morphogenetic protein 3	NM_173404	NM_173404	10523506
2	chr5	+	99359618	99360052	1.7502	2.03754	2.27481	2.17081	2.05143	2.27954	2.18375	1.97275	2.05834	2.12187	Prkg2	protein kinaAE, cGMP-dependent, type II	NM_008926	NM_008926	10523511
	chr5	-	99360287	99466370	2.72049	2.37625	2.47631	2.59141	2.57763	2.49982	2.71301	2.46573	2.54112	2.56405	Prkg2	protein kinaAE, cGMP-dependent, type II	NM_008926	NM_008926	10531588
3	chr15	-	96517823	96530129	10.4175	9.83839	9.9328	9.97578	10.6765	10.5079	10.1385	9.95887	10.0411	10.3205	Slc38a2	solute carrier family 38, member 2	NM_175121	NM_175121	10431894
3	chr15	-	96597192	96597500	3.57008	3.66292	3.91304	3.81762	3.9065	3.4408	3.50639	3.60335	3.74092	3.61426	---	---	---	GENSCAN00000008681	10431912
3	chr15	-	96825254	96886387	6.38273	6.39587	6.37909	6.80621	6.74636	6.60504	6.52638	6.6075	6.49097	6.62132	Slc38a4	solute carrier family 38, member 4	NM_027052	NM_027052	10431915
3	chr15	-	97074556	97077718	4.94325	5.03114	5.40898	4.84813	4.74509	5.2088	4.81792	4.96675	5.05788	4.93464	Amigo2	adhesion molecule with Ig like domain 2	NM_178114	NM_178114	10431935
4	chr6	+	78320879	78323460	2.12141	2.06337	2.20381	2.14466	2.30036	2.08709	2.112	2.20754	2.13331	2.17675	Reg3b	regenerating islet-derived 3 beta	NM_011036	NM_011036	10539179
4	chr6	-	78325868	78328859	2.04893	2.32094	2.49436	2.29996	2.22101	2.09845	2.12266	2.18441	2.29105	2.15663	Reg3d	regenerating islet-derived 3 delta	NM_013893	NM_013893	10545561
4	chr6	+	78330703	78333833	2.29674	2.01893	2.2692	2.08087	2.16572	2.12395	2.25761	2.44597	2.16643	2.24831	Reg3a	regenerating islet-derived 3 alpha	NM_011259	NM_011259	10539186
4	chr6	+	78355149	78358093	2.14852	2.14433	2.19957	2.13671	2.17477	2.11978	1.96722	1.99415	2.15728	2.06398	Reg2	regenerating islet-derived 2	NM_009043	NM_009043	10539194
4	chr6	+	78375977	78378660	2.0027	2.22509	2.28229	2.25775	2.47492	2.23555	2.11539	2.24718	2.19196	2.26826	Reg1	regenerating islet-derived 1	NM_009042	NM_009042	10539200
4	chr6	-	78416262	78418868	2.21717	1.97052	1.89896	2.25241	1.97078	2.16301	2.03306	1.96334	2.08476	2.03255	Reg3g	regenerating islet-derived 3 gamma	NM_011260	NM_011260	10545569
4	chr6	+	78861161	78861322	1.78262	1.81876	1.83584	1.99231	1.85456	1.82097	1.84426	1.85878	1.85738	1.84464	---	---	---	ENSMUST00000083352	10539207
5	chr7	+	129432639	129778320	3.79791	3.74678	3.8189	3.82803	3.84999	4.15896	4.06556	3.89457	3.79791	3.99227	Prkcb	protein kinaAE C, beta	NM_008855	NM_008855	10557177
5	chr7	+	129815288	129912360	2.27364	2.61066	2.4638	2.30447	2.08597	2.23152	2.32548	2.30327	2.41314	2.23656	Cacng3	calcium channel, voltage-dependent, gamma subunit 3	NM_019430	NM_019430	10557201
6	chr9	-	115151588	115219539	8.29799	8.39438	8.22824	8.22464	8.36516	8.24279	8.26065	8.14704	8.28631	8.25391	Stt3b	STT3, subunit of the oligosaccharyltransferaAE complex, homolog B (S. cerevisiae)	NM_024222	NM_024222	10597493
6	chr9	+	115218957	115219733	5.80832	5.57999	5.58833	5.58646	5.70795	5.62682	5.52396	6.00228	5.64077	5.71525	Stt3b	STT3, subunit of the oligosaccharyltransferaAE complex, homolog B (S. cerevisiae)	NM_024222	NM_024222	10589955
6	chr9	+	115314337	115314760	7.25276	6.87955	7.00825	7.00018	7.07751	7.13572	7.18925	7.36399	7.03518	7.19162	LOC675823	similar to Glyceraldehyde-3-phosphate dehydrogenaAE (GAPDH)	XR_032777	XR_032777	10589958
6	chr9	-	115346818	115347699	8.12114	8.26327	8.26258	8.46024	7.91946	8.01933	8.07636	8.17866	8.27681	8.04845	Gm5921	predicted gene 5921	ENSMUST00000075898	ENSMUST00000075898	10597511
6	chr9	-	115535718	115535836	5.79043	5.88206	5.77607	5.87437	5.79437	5.74242	5.85657	5.89969	5.83073	5.82326	---	---	ENSMUST00000083215	ENSMUST00000083215	10597513
6	chr9	+	115818573	115983465	2.62308	2.61011	2.26584	2.41527	2.41466	2.8673	2.57353	2.47859	2.47857	2.58352	Gadl1	glutamate decarboxylaAE-like 1	NM_028638	NM_028638	10589960
7	chr2	+	18680611	18681387	2.08012	2.2636	2.02297	2.25851	2.46256	2.11734	2.25243	2.34033	2.1563	2.29316	---	---	---	ENSMUST00000119424	10469536
7	chr2	-	18763887	18919753	5.80586	5.78498	5.98237	5.96096	5.41024	5.8222	6.11324	5.79983	5.88354	5.78638	Pip4k2a	phosphatidylinositol-5-phosphate 4-kinaAE, type II, alpha	NM_008845	NM_008845	10480347
7	chr2	+	18919970	18921428	2.77707	3.05125	2.70408	2.73267	3.02301	2.89366	2.58198	2.60536	2.81627	2.776	4930426L09Rik	RIKEN cDNA 4930426L09 gene	NR_024323	NR_024323	10469538
7	chr2	+	19123405	19231742	2.36264	2.19298	2.29227	2.29912	2.43996	2.38155	2.02851	2.12007	2.28675	2.24252	Armc3	armadillo repeat containing 3	NM_001081083	NM_001081083	10469540
7	chr2	+	19293263	19316599	7.75638	7.70144	7.86359	7.72745	7.71247	7.63666	7.74206	7.82354	7.76221	7.72868	Msrb2	methionine sulfoxide reductaAE B2	NM_029619	NM_029619	10469559
7	chr2	+	19367265	19369124	2.61631	2.49908	2.52368	2.71012	2.5632	2.56354	2.47429	2.5055	2.5873	2.52663	Ptf1a	pancreas specific transcription factor, 1a	NM_018809	NM_018809	10469565
7	chr2	+	19374097	19376622	5.36237	5.25698	5.22161	5.39656	5.25333	5.41279	5.46878	5.71723	5.30938	5.46303	1810010K12Rik	RIKEN cDNA 1810010K12 gene	ENSMUST00000070378	ENSMUST00000070378	10469568
7	chr2	-	19384464	19476084	2.02078	2.23532	2.16007	2.24778	2.00196	2.16432	2.38127	2.12683	2.16599	2.16859	4921504E06Rik	RIKEN cDNA 4921504E06 gene	BC132142	BC132142	10480360
7	chr2	+	19580383	19581313	6.83904	6.10293	6.38689	6.25237	7.78575	7.48933	6.56335	6.19881	6.39531	7.00931	Otud1	OTU domain containing 1	ENSMUST00000052168	ENSMUST00000052168	10469571
7	chr2	+	19856508	19856579	2.08765	2.30544	1.85618	2.07605	1.97083	1.9573	1.963	1.90163	2.08133	1.94819	---	---	---	ENSMUST00000083710	10469573
7	chr2	+	19913893	19916682	8.78242	9.03234	9.06147	9.09562	8.51867	8.54567	8.64948	8.27792	8.99296	8.49794	Gm13363	protein tyrosine phosphataAE 4a1-like	NR_002688	NR_002688	10469575
7	chr2	+	19928667	19933003	2.09876	2.07949	2.03574	2.08725	2.15029	2.23597	2.12322	2.11478	2.07531	2.15606	Gm16495	predicted gene 16495	ENSMUST00000105000	ENSMUST00000105000	10469577
7	chr2	-	20156672	20157727	5.91226	6.34349	6.33539	6.35512	5.95569	6.06723	6.0843	6.19528	6.23656	6.07563	Mrps5	mitochondrial ribosomal protein S5	NM_029963	NM_029963	10480379
7	chr2	+	20202146	20202252	2.36312	2.56746	2.44601	2.57245	2.4202	2.56363	2.46739	2.41762	2.48726	2.46721	---	---	---	ENSMUST00000083319	10469579
7	chr2	+	20431674	20732151	6.56368	6.8483	6.53287	6.59299	6.64456	6.53019	6.6867	6.35181	6.63446	6.55332	Etl4	enhancer trap locus 4	NM_001081006	NM_001081006	10469581
7	chr2	-	20769567	20889348	7.05987	7.18261	7.09621	7.11925	7.25854	7.34476	7.4546	7.20067	7.11448	7.31464	Arhgap21	Rho GTPaAE activating protein 21	NM_001128084	NM_001128084	10480381
7	chr2	+	20891520	20891834	7.06559	7.2656	7.0643	7.02119	7.39411	7.48422	7.63268	7.46253	7.10417	7.49338	Gm13375	predicted gene 13375	ENSMUST00000100373	ENSMUST00000100373	10469609
7	chr2	-	20966435	21063581	2.30676	2.28528	2.43432	2.4607	2.76956	2.41024	2.41966	2.49349	2.37176	2.52324	---	---	---	GENSCAN00000001847	10480406
7	chr2	+	21062547	21065833	2.7146	2.83957	2.50775	2.5895	2.79703	2.72088	2.70082	2.80877	2.66285	2.75687	C130046B21Rik	RIKEN cDNA C130046B21 gene	AK048278	AK048278	10469611
7	chr2	-	21102358	21126992	2.62482	2.66883	2.81817	2.5546	2.36153	2.67327	2.6268	2.64577	2.66661	2.57684	Enkur	enkurin, TRPC channel interacting protein	NM_027728	NM_027728	10480414
7	chr2	+	21127351	21136636	4.42845	4.48844	4.33095	4.75072	4.66368	4.70571	4.60069	4.67111	4.49964	4.6603	Thnsl1	threonine synthaAE-like 1 (bacterial)	NM_177588	NM_177588	10469613
7	chr2	+	21289194	21752171	2.43275	2.35287	2.47244	2.55992	2.48453	2.61004	2.52237	2.54972	2.4545	2.54167	Gpr158	G protein-coupled receptor 158	NM_001004761	NM_001004761	10469622
7	chr2	+	21802837	21803190	2.06234	1.94721	2.5266	2.19194	2.12672	2.32475	1.83089	1.92636	2.18202	2.05218	Gm10846	predicted gene 10846	ENSMUST00000100368	ENSMUST00000100368	10469635
7	chr2	+	22149132	22473767	2.16481	2.20776	2.03157	2.07035	2.01476	2.30481	2.26656	2.07727	2.11862	2.16585	Myo3a	myosin IIIA	NM_148413	NM_148413	10469637
7	chr2	+	22477838	22546510	2.4629	2.61736	2.36099	2.53256	2.64664	2.20922	2.50545	2.52487	2.49345	2.47155	Gad2	glutamic acid decarboxylaAE 2	NM_008078	NM_008078	10469672
7	chr2	+	22617492	22617761	2.31864	2.2845	2.23898	2.16895	2.18545	2.54903	2.27761	2.22003	2.25277	2.30803	1700092C17Rik	RIKEN cDNA 1700092C17 gene	AK007039	AK007039	10469693
7	chr2	+	22629900	22730890	3.0756	3.40241	3.40552	3.77533	3.3641	3.48674	3.60143	3.48127	3.41472	3.48339	Apbb1ip	amyloid beta (A4) precursor protein-binding, family B, member 1 interacting protein	NM_019456	NM_019456	10469695
7	chr2	-	22750841	22751256	2.98309	2.94281	2.84983	2.87927	2.947	3.01201	2.88599	2.95061	2.91375	2.9489	A130006I12Rik	RIKEN cDNA A130006I12 gene	AK015028	AK015028	10480421
7	chr2	+	22751115	22768261	6.44911	6.69312	6.60987	6.85416	6.30412	6.52617	6.41683	6.5015	6.65156	6.43715	Pdss1	prenyl (solanesyl) diphosphate synthaAE, subunit 1	NM_019501	NM_019501	10469712
7	chr2	-	22805705	22895585	7.73297	7.8099	7.82408	7.95284	7.9138	7.85002	7.98057	7.84031	7.82995	7.89617	Abi1	abl-interactor 1	NM_001077190	NM_001077190	10480423
7	chr2	+	22924787	22970033	6.70313	6.7181	6.61162	6.77303	6.87083	6.82095	6.93863	6.65705	6.70147	6.82187	Acbd5	acyl-Coenzyme A binding domain containing 5	NM_001102437	NM_001102437	10469720
7	chr2	-	22973585	23011436	2.2018	2.19602	2.44292	2.58549	2.17744	2.45656	2.31556	2.39931	2.35656	2.33722	Mastl	microtubule associated AErine/threonine kinaAE-like	NM_025979	NM_025979	10480432
7	chr2	+	23012056	23054156	9.14567	9.2064	9.25601	9.18316	9.13694	9.08613	9.06534	9.15718	9.19781	9.1114	Yme1l1	YME1-like 1 (S. cerevisiae)	NM_013771	NM_013771	10469732
7	chr2	+	23062996	23122638	1.90206	1.89777	1.87252	2.04266	2.07369	2.0469	1.94839	1.92841	1.92875	1.99935	4931423N10Rik	RIKEN cDNA 4931423N10 gene	ENSMUST00000028113	ENSMUST00000028113	10469755
7	chr2	+	23176766	23257493	2.08011	1.85888	2.03992	2.31243	2.13357	1.98167	2.26193	2.02741	2.07284	2.10114	Nxph2	neurexophilin 2	NM_008752	NM_008752	10469767
7	chr2	+	23364380	23365074	11.4327	11.4084	11.3963	11.4835	11.4495	11.3977	11.409	11.3962	11.4302	11.4131	Ube2d3	ubiquitin-conjugating enzyme E2D 3 (UBC4/5 homolog, yeast)	NM_025356	NM_025356	10469772
7	chr2	-	23365574	23427574	6.37884	6.44196	6.31326	6.43106	6.45861	6.36894	6.55371	6.30603	6.39128	6.42182	Spopl	speckle-type POZ protein-like	NM_029773	NM_029773	10480445
7	chr2	-	23858429	23904899	5.32275	5.39931	5.64356	5.38498	5.22469	5.21164	5.2662	5.07821	5.43765	5.19518	Hnmt	histamine N-methyltransferaAE	NM_080462	NM_080462	10480459
7	chr2	-	23926890	23952115	2.28782	1.9838	1.98694	2.07842	1.92043	2.06389	1.9024	2.13844	2.08425	2.00629	Tbpl2	TATA box binding protein like 2	NM_199059	NM_199059	10480468
7	chr2	+	24008681	24016039	2.08572	2.14071	2.28637	2.49127	2.07567	1.9993	2.06232	2.2414	2.25102	2.09467	Il1f8	interleukin 1 family, member 8	NM_027163	NM_027163	10469774
7	chr2	+	24034387	24035837	2.12814	2.07427	1.95786	2.01944	2.27213	2.37329	2.08129	2.37266	2.04493	2.27484	---	---	---	ENSMUST00000117058	10469782
7	chr2	+	24042002	24049087	2.39938	2.23661	2.06975	2.37827	2.28676	2.21767	2.35668	2.35834	2.271	2.30486	Il1f9	interleukin 1 family, member 9	NM_153511	NM_153511	10469786
7	chr2	+	24070937	24081221	2.26423	2.33185	2.437	2.21736	2.26572	2.10274	2.19146	2.16877	2.31261	2.18217	Il1f6	interleukin 1 family, member 6	NM_019450	NM_019450	10469793
7	chr2	+	24132474	24138946	2.6298	2.60591	2.75999	3.00809	2.92827	2.56275	2.37111	2.73233	2.75095	2.64862	Il1f5	interleukin 1 family, member 5 (delta)	NM_001146087	NM_001146087	10469801
7	chr2	+	24146716	24149340	2.51621	2.48905	2.2258	2.42847	2.50947	2.37861	2.32475	2.36551	2.41488	2.39458	Il1f10	interleukin 1 family, member 10	NM_153077	NM_153077	10469811
7	chr2	+	24192379	24207005	3.04458	2.95679	2.98628	3.1034	3.1321	2.93585	2.79177	2.95924	3.02276	2.95474	Il1rn	interleukin 1 receptor antagonist	NM_031167	NM_031167	10469816
7	chr2	+	24223195	24264249	2.66575	2.77579	2.87903	2.8287	2.90726	2.82339	2.91113	2.94831	2.78732	2.89753	Psd4	pleckstrin and AEc7 domain containing 4	NM_177611	NM_177611	10469828
7	chr2	-	24276076	24331094	3.4673	3.39535	3.33137	3.31347	3.22606	3.40093	2.84828	3.38386	3.37688	3.21478	Pax8	paired box gene 8	NM_011040	NM_011040	10480477
7	chr2	-	24448422	24449178	2.31054	2.23532	2.2841	1.98266	2.06958	2.22444	2.35117	2.11353	2.20316	2.18968	---	---	---	ENSMUST00000117264	10480490
7	chr2	-	24461895	24618680	2.80013	2.75017	2.87831	2.96672	3.26653	2.99671	2.77209	2.82823	2.84883	2.96589	Cacna1b	calcium channel, voltage-dependent, N type, alpha 1B subunit	NM_001042528	NM_001042528	10480492
7	chr2	-	24646315	24775121	6.24892	6.20767	6.08209	6.19885	6.01401	6.07223	5.99043	5.95756	6.18438	6.00856	Ehmt1	euchromatic histone methyltransferaAE 1	NM_001012518	NM_001012518	10480541
7	chr2	-	24780872	24790685	3.52912	3.82632	3.76214	4.14348	3.50358	3.67181	4.02459	3.72887	3.81526	3.73221	Arrdc1	arrestin domain containing 1	NM_001162485	NM_001162485	10480570
7	chr2	+	24805302	24815045	5.74009	5.47792	5.4243	5.68982	5.66	5.52285	5.60362	5.32263	5.58303	5.52728	Zmynd19	zinc finger, MYND domain containing 19	NM_026021	NM_026021	10469849
7	chr2	+	24817943	24828991	4.30952	4.57898	4.29601	4.442	4.57221	4.48253	4.4836	4.60691	4.40663	4.53631	Wdr85	WD repeat domain 85	NM_026044	NM_026044	10469856
7	chr2	-	24827990	24830618	5.58903	5.65098	5.84284	5.72255	5.50556	5.49936	5.64107	5.52754	5.70135	5.54338	Mrpl41	mitochondrial ribosomal protein L41	NM_001031808	NM_001031808	10480579
7	chr2	+	24831582	24909577	6.32691	6.43227	6.40684	6.54649	6.50974	6.48786	6.53416	6.24459	6.42813	6.44409	Pnpla7	patatin-like phospholipaAE domain containing 7	NM_146251	NM_146251	10469867
7	chr2	+	24841474	24842033	11.0486	11.144	11.176	11.1532	10.8273	10.8404	10.8898	10.9533	11.1304	10.8777	Rpl21	ribosomal protein L21	NM_019647	NM_019647	10469904
7	chr2	-	24861672	24861778	1.87627	1.59909	1.73387	1.88393	1.88398	2.09863	1.61983	1.77789	1.77329	1.84508	---	---	---	ENSMUST00000083864	10480583
7	chr2	+	24909899	24918401	4.84781	4.92626	4.88058	5.03156	4.86574	4.80785	4.9079	5.17199	4.92155	4.93837	Nelf	nasal embryonic LHRH factor	NM_001039386	NM_001039386	10469906
7	chr2	+	24935842	24941239	2.75982	2.51223	2.56937	2.78877	3.0256	2.7021	2.81585	2.653	2.65755	2.79914	Entpd8	ectonucleoside triphosphate diphosphohydrolaAE 8	NM_028093	NM_028093	10469923
7	chr2	-	24941187	24950669	2.74646	2.33829	2.75719	2.90082	2.85282	2.76779	2.52023	2.63874	2.68569	2.69489	Noxa1	NADPH oxidaAE activator 1	NM_172204	NM_172204	10480585
7	chr2	+	25036278	25038859	5.2569	5.21946	5.26203	5.67524	5.12727	5.56973	5.69731	5.40307	5.35341	5.44935	Nrarp	Notch-regulated ankyrin repeat protein	NM_025980	NM_025980	10469936
7	chr2	-	25048219	25052246	3.92492	3.70459	3.83902	3.9792	3.83027	3.7957	4.04554	3.82147	3.86193	3.87325	A830007P12Rik	RIKEN cDNA A830007P12 gene	BC013092	BC013092	10480601
7	chr2	-	25055236	25066901	6.45826	6.40972	6.56378	6.62498	6.40849	6.50559	6.44426	6.53689	6.51419	6.47381	Cobra1	cofactor of BRCA1	NM_021393	NM_021393	10480605
7	chr2	+	25064146	25064244	2.11408	2.24095	2.26232	2.18442	1.90693	2.28538	2.34087	2.3338	2.20044	2.21674	---	---	---	ENSMUST00000082985	10469941
7	chr2	-	25067728	25070151	2.60163	3.10882	2.60221	3.11537	3.42885	2.72714	3.33711	2.93886	2.85701	3.10799	4933433C11Rik	RIKEN cDNA 4933433C11 gene	BC132286	BC132286	10480621
7	chr2	+	25074265	25077800	2.59748	2.40802	2.43714	2.61323	2.68227	2.28739	2.58983	2.58448	2.51397	2.53599	Fam166a	family with AEquence similarity 166, member A	BC061039	BC061039	10469943
7	chr2	-	25077682	25080164	9.12614	9.3028	9.20842	9.14398	9.21292	9.41959	9.14904	9.09677	9.19534	9.21958	Tubb2c	tubulin, beta 2C	NM_146116	NM_146116	10480628
7	chr2	-	25084417	25089723	3.48027	3.23128	3.04716	3.20872	3.45242	3.33455	3.26969	3.26718	3.24186	3.33096	Slc34a3	solute carrier family 34 (sodium phosphate), member 3	NM_080854	NM_080854	10480633
7	chr2	-	25089996	25092307	2.82352	3.24393	2.93173	3.18449	3.61445	3.01857	3.13439	3.37278	3.04592	3.28505	Gm757	predicted gene 757	BC147426	BC147426	10480646
7	chr2	-	25094347	25095417	3.47034	3.40563	3.6381	3.9184	3.35683	3.79762	3.54613	3.64801	3.60812	3.58715	2310002J15Rik	RIKEN cDNA 2310002J15 gene	BC117777	BC117777	10480649
7	chr2	+	25098458	25099782	3.63632	3.99831	3.75824	3.78219	4.18606	3.97301	3.4753	4.03318	3.79377	3.91689	Rnf208	ring finger protein 208	NM_176834	NM_176834	10469951
7	chr2	-	25100339	25110898	4.93321	4.87879	4.77182	4.93449	4.80748	4.87868	5.05677	4.94572	4.87958	4.92216	Ndor1	NADPH dependent diflavin oxidoreductaAE 1	NM_001082476	NM_001082476	10480652
7	chr2	+	25110974	25111811	6.83604	6.54227	6.68682	6.80033	6.84002	6.64305	6.82647	6.63954	6.71637	6.73727	C730025P13Rik	RIKEN cDNA C730025P13 gene	NM_177344	NM_177344	10469954
7	chr2	+	25118138	25125406	3.34098	3.47598	3.4029	3.65643	3.50576	3.64361	3.53526	3.38129	3.46907	3.51648	C430004E15Rik	RIKEN cDNA C430004E15 gene	NM_175286	NM_175286	10469957
7	chr2	-	25126559	25127938	6.29366	6.2156	6.52518	6.48049	6.26136	6.34049	6.30636	6.18926	6.37873	6.27437	Ssna1	Sjogren's syndrome nuclear autoantigen 1	NM_023464	NM_023464	10480672
7	chr2	+	25128019	25141435	7.28146	7.20227	7.14357	7.4003	7.16843	7.42608	7.48395	7.41193	7.2569	7.3726	Anapc2	anaphaAE promoting complex subunit 2	NM_175300	NM_175300	10469965
7	chr2	+	25143665	25144703	3.04426	2.78578	2.71888	2.63002	3.13205	2.75567	2.73749	3.15184	2.79473	2.94426	Tmem210	transmembrane protein 210	ENSMUST00000028340	ENSMUST00000028340	10469979
7	chr2	+	25145436	25146700	3.38275	3.00466	3.06939	3.24666	2.92367	3.30348	2.78434	3.18482	3.17587	3.04908	Lrrc26	leucine rich repeat containing 26	NM_146117	NM_146117	10469984
7	chr2	-	25146701	25174623	3.26729	3.00198	2.93802	3.00874	3.1349	3.12104	2.82657	3.23068	3.05401	3.0783	Grin1	glutamate receptor, ionotropic, NMDA1 (zeta 1)	NM_008169	NM_008169	10480676
7	chr2	+	25188276	25207732	5.77388	5.8817	5.79933	6.19546	5.97912	6.05744	5.9258	5.75279	5.91259	5.92879	Man1b1	mannosidaAE, alpha, class 1B, member 1	NM_001029983	NM_001029983	10469987
7	chr2	-	25207807	25211852	3.86817	3.78165	3.49155	3.86167	3.7613	3.90083	3.95967	3.87196	3.75076	3.87344	Dpp7	dipeptidylpeptidaAE 7	NM_031843	NM_031843	10480699
7	chr2	-	25215876	25221146	5.10362	4.96063	5.10675	5.28423	4.90147	5.19139	5.10982	5.30203	5.11381	5.12618	Uap1l1	UDP-N-acteylglucosamine pyrophosphorylaAE 1-like 1	NM_001033293	NM_001033293	10480714
7	chr2	+	25227555	25233001	3.26045	3.14295	3.08333	3.2897	3.315	3.02664	3.23791	3.50109	3.19411	3.27016	2010317E24Rik	RIKEN cDNA 2010317E24 gene	AB197927	AB197927	10470001
7	chr2	+	25251423	25256838	5.30248	5.18645	5.36031	5.58098	5.45461	5.33412	5.45742	5.52907	5.35756	5.4438	Entpd2	ectonucleoside triphosphate diphosphohydrolaAE 2	NM_009849	NM_009849	10470014
7	chr2	+	25258603	25265014	4.36762	4.04533	4.32597	4.33825	4.26142	4.422	4.53406	4.51093	4.26929	4.4321	Npdc1	neural proliferation, differentiation and control gene 1	NM_008721	NM_008721	10470027
7	chr2	+	25278804	25281891	2.70115	2.5146	2.68052	2.98692	2.73041	2.69602	2.64407	2.81047	2.7208	2.72024	Fut7	fucosyltransferaAE 7	NM_013524	NM_013524	10470042
7	chr2	+	25282767	25304059	6.93755	6.73331	6.56159	6.69436	6.68863	6.87312	6.90599	6.8175	6.7317	6.82131	Abca2	ATP-binding casAEtte, sub-family A (ABC1), member 2	NM_007379	NM_007379	10470050
7	chr2	+	25312358	25314296	3.2411	3.29766	3.51431	2.99451	3.62542	3.12016	3.30421	3.17847	3.2619	3.30706	Clic3	chloride intracellular channel 3	NM_027085	NM_027085	10470101
7	chr2	-	25315006	25316614	5.34329	5.03909	5.17984	5.51215	5.26795	5.22497	5.32494	5.33166	5.26859	5.28738	BC029214	cDNA AEquence BC029214	BC029214	BC029214	10480725
7	chr2	-	25319540	25325256	8.80991	8.8574	8.63477	8.6572	8.90152	9.30902	9.55131	9.07645	8.73982	9.20957	Ptgds	prostaglandin D2 synthaAE (brain)	NM_008963	NM_008963	10480734
7	chr2	-	25346363	25349431	3.03795	3.1601	2.83563	2.91507	3.27005	2.78814	2.52523	2.96503	2.98719	2.88711	Lcn12	lipocalin 12	NM_029958	NM_029958	10480744
7	chr2	-	25354171	25357239	3.65169	3.44102	3.6113	3.57472	3.64645	3.36125	3.63936	3.63879	3.56968	3.57146	C8g	complement component 8, gamma polypeptide	NM_027062	NM_027062	10480751
7	chr2	+	25356298	25360991	8.38143	8.28872	8.3054	8.5022	8.16473	8.23669	8.34628	8.24924	8.36944	8.24924	Fbxw5	F-box and WD-40 domain protein 5	NM_013908	NM_013908	10470109
7	chr2	-	25373502	25402414	6.20458	5.88785	6.18231	6.0191	6.07056	5.82762	5.95184	5.99414	6.07346	5.96104	Traf2	TNF receptor-associated factor 2	NM_009422	NM_009422	10480760
7	chr2	+	25413395	25417602	8.31279	8.35201	8.4265	8.40182	8.25172	8.32955	8.46118	8.3074	8.37328	8.33746	Edf1	endothelial differentiation-related factor 1	NM_021519	NM_021519	10470119
7	chr2	-	25418851	25426727	3.38125	3.51795	3.31897	3.45715	3.51797	3.04983	3.23136	3.34391	3.41883	3.28577	Mamdc4	MAM domain containing 4	NM_001081199	NM_001081199	10480775
7	chr2	-	25428950	25430391	8.45392	8.55565	8.56149	8.69789	8.39844	8.41973	8.21997	8.285	8.56724	8.33079	Phpt1	phosphohistidine phosphataAE 1	NM_029293	NM_029293	10480804
7	chr2	-	25430950	25435619	3.28062	3.06603	3.02277	3.15262	3.5314	3.26677	2.9731	3.33446	3.13051	3.27643	Gm996	predicted gene 996	NM_001005424	NM_001005424	10480808
7	chr2	-	25438538	25463966	7.89502	7.73219	7.70476	7.90718	7.80133	7.91933	8.14841	8.14365	7.80979	8.00318	B230208H17Rik	RIKEN cDNA B230208H17 gene	BC085507	BC085507	10480813
7	chr2	-	25464000	25473179	2.96911	2.77482	3.07865	3.31582	3.31607	3.03103	2.9107	2.8731	3.0346	3.03273	4921530D09Rik	RIKEN cDNA 4921530D09 gene	ENSMUST00000028309	ENSMUST00000028309	10480829
7	chr2	+	25471527	25487279	2.51446	2.49239	2.50116	2.64763	2.66867	2.52027	2.59363	2.59799	2.53891	2.59514	Fcna	ficolin A	NM_007995	NM_007995	10470125
7	chr2	-	25475623	25477522	6.18271	6.1502	6.45189	6.41824	6.04365	6.20971	6.28256	6.50418	6.30076	6.26003	Tmem141	transmembrane protein 141	NM_001109993	NM_001109993	10480842
7	chr2	-	25480186	25483431	4.32603	4.53671	4.38538	4.53696	5.10914	4.65703	4.8778	4.99608	4.44627	4.91001	Fcna	ficolin A	NM_007995	NM_007995	10480849
7	chr2	+	25499346	25504539	2.12225	2.23532	2.24213	2.14247	2.37629	2.30743	2.29528	2.1997	2.18554	2.29467	---	---	---	GENSCAN00000029755	10470135
7	chr2	+	25508638	25511740	2.3691	2.56196	2.71657	2.35256	2.6008	2.65526	2.41908	2.65883	2.50005	2.58349	Lcn8	lipocalin 8	NM_033145	NM_033145	10470141
7	chr2	+	25513475	25532466	2.33132	2.47655	2.34483	2.49119	2.321	2.39867	2.30144	2.4841	2.41097	2.37631	Lcn5	lipocalin 5	NM_007947	NM_007947	10470149
7	chr2	+	25532346	25537125	2.50332	2.42616	2.31421	2.38081	2.62267	2.49101	2.4606	2.50281	2.40612	2.51927	Lcn6	lipocalin 6	NM_177840	NM_177840	10470158
7	chr2	+	25538246	25541601	2.52774	2.29397	2.63563	2.67502	2.74757	2.32301	2.5976	2.73553	2.53309	2.60093	Lcn10	lipocalin 10	NM_178036	NM_178036	10470166
7	chr2	+	25555558	25558846	2.24992	2.20696	2.40656	2.26587	2.48509	2.26445	2.21137	2.35141	2.28233	2.32808	Lcn13	lipocalin 13	NM_153558	NM_153558	10470175
7	chr2	+	25562300	25563414	5.9624	5.8177	6.01459	5.97788	6.02173	6.11453	6.35155	6.17555	5.94314	6.16584	Bmyc	brain expresAEd myelocytomatosis oncogene	NM_023326	NM_023326	10470182
7	chr2	+	25592587	25595124	2.27855	2.33446	2.35068	2.17024	2.21788	2.55073	2.28625	2.21107	2.28348	2.31648	Lcn14	lipocalin 14	NM_001099301	NM_001099301	10470186
7	chr2	+	25621068	25623619	2.16486	1.85151	2.07297	2.1031	2.25569	2.55645	2.3196	2.09553	2.04811	2.30682	Lcn3	lipocalin 3	NM_010694	NM_010694	10470192
7	chr2	+	25632537	25634797	2.37039	2.2262	2.22628	2.5762	2.26807	2.39534	2.1691	2.44328	2.34977	2.31895	Lcn11	lipocalin 11	NM_001100455	NM_001100455	10470200
7	chr2	-	25649379	25671363	2.31961	2.39949	2.46981	2.42696	2.4298	2.30816	2.42299	2.54146	2.40397	2.4256	Glt6d1	glycosyltransferaAE 6 domain containing 1	NM_001039095	NM_001039095	10480862
7	chr2	+	25678673	25681057	2.45984	2.51132	2.57624	2.54473	2.52615	2.3069	2.25668	2.55149	2.52303	2.41031	Lcn9	lipocalin 9	NM_029959	NM_029959	10470206
7	chr2	-	25698515	25702768	3.19391	3.0448	2.91906	3.0196	3.50259	3.14168	3.00504	2.90426	3.04434	3.13839	Sohlh1	spermatogenesis and oogenesis specific basic helix-loop-helix 1	NM_001001714	NM_001001714	10480869
7	chr2	+	25719498	25773793	3.00475	2.74259	2.91925	3.01368	3.10485	3.17818	3.03716	3.18149	2.92006	3.12542	Kcnt1	potassium channel, subfamily T, member 1	NM_175462	NM_175462	10470214
7	chr2	-	25785246	25838554	6.55758	6.44656	6.33164	6.23138	6.6668	6.78513	6.38441	6.51877	6.39179	6.58878	Camsap1	calmodulin regulated spectrin-associated protein 1	NM_001115076	NM_001115076	10480878
7	chr2	-	25854067	25877231	8.08707	8.0889	8.139	8.03877	7.89128	7.83712	7.7999	7.84418	8.08844	7.84312	Ubac1	ubiquitin associated domain containing 1	NM_133835	NM_133835	10480891
7	chr2	-	25911056	25978331	5.9856	6.00393	5.86985	6.07668	6.07931	6.07067	6.12307	5.94318	5.98402	6.05406	Nacc2	nucleus accumbens associated 2, BEN and BTB (POZ) domain containing	NM_001037098	NM_001037098	10480901
7	chr2	-	26055732	26063769	2.78135	2.97579	2.97652	3.0671	3.37669	2.76238	2.80461	2.97705	2.95019	2.98018	Lhx3	LIM homeobox protein 3	NM_001039653	NM_001039653	10480912
7	chr2	-	26064645	26092932	5.79398	6.59464	6.44398	6.34607	5.94954	5.90252	6.09749	5.70053	6.29467	5.91252	Qsox2	quiescin Q6 sulfhydryl oxidaAE 2	NM_153559	NM_153559	10480921
7	chr2	-	26101853	26102227	2.69559	2.51565	2.45827	2.30952	2.69683	2.74801	2.34041	2.53508	2.49476	2.58008	C030048H21Rik	RIKEN cDNA C030048H21 gene	XM_923021	XM_923021	10480937
7	chr2	-	26127167	26150077	3.31091	3.17407	3.06188	3.39524	3.09848	3.16952	3.28421	3.25988	3.23552	3.20302	4932418E24Rik	RIKEN cDNA 4932418E24 gene	NM_177841	NM_177841	10480939
8	chr9	-	61801545	61874597	3.13454	3.06001	3.03907	3.37127	3.32006	3.01978	3.07206	3.37896	3.15122	3.19771	Paqr5	progestin and adipoQ receptor family member V	NM_028748	NM_028748	10594277
9	chr6	+	143194413	143245792	2.7467	2.62605	2.59483	2.65996	2.83211	2.6162	2.51622	2.77103	2.65689	2.68389	D6Ertd474e	DNA AEgment, Chr 6, ERATO Doi 474, expresAEd	NR_027803	NR_027803	10542686
9	chr6	-	143781349	144158000	3.45202	3.64934	3.65645	3.78586	3.73534	3.68855	3.83642	3.84936	3.63592	3.77742	Sox5	SRY-box containing gene 5	NM_011444	NM_011444	10549200
9	chr6	-	144619715	144621011	2.11213	2.25596	2.09596	2.20375	2.20079	2.02078	1.85104	2.30664	2.16695	2.09481	Gm10396	predicted gene 10396	ENSMUST00000100814	ENSMUST00000100814	10549219
10	chr4	+	123594676	123614243	6.96467	6.97586	7.00314	7.18988	7.1633	7.04619	7.08952	7.03918	7.03339	7.08455	Rragc	Ras-related GTP binding C	NM_017475	NM_017475	10507894
10	chr4	-	123594747	123595265	5.99648	5.96035	5.59495	5.80692	6.11382	5.83465	5.51711	6.01176	5.83967	5.86934	Rragc	Ras-related GTP binding C	NM_017475	NM_017475	10516225
10	chr4	+	124251381	124251749	3.07857	3.21796	2.69691	3.11648	3.26081	3.37244	3.13136	3.25789	3.02748	3.25562	4933407E24Rik	RIKEN cDNA 4933407E24 gene	ENSMUST00000097893	ENSMUST00000097893	10507903
12	chr1	-	134406004	134439493	3.9954	4.34798	4.07523	4.16517	4.32904	3.96548	3.69591	4.50682	4.14595	4.12431	Cntn2	contactin 2	NM_177129	NM_177129	10357705
13	chr11	-	28285692	28484324	4.77387	4.85484	4.92777	5.34929	5.10552	4.87797	5.1954	5.16273	4.97644	5.08541	Ccdc85a	coiled-coil domain containing 85A	NM_181577	NM_181577	10384797
13	chr11	+	28483316	28483983	5.21781	5.10314	5.21682	5.18116	5.0912	4.95273	5.05055	5.28203	5.17973	5.09413	---	---	---	---	10374769
13	chr11	+	28646191	28646276	2.26567	2.07569	1.90342	2.33626	2.077	2.12585	2.25336	2.04922	2.14526	2.12636	---	---	---	mmu-mir-216b	10374771
13	chr11	+	28657012	28657083	2.17264	2.22858	2.2132	2.34414	2.21575	2.24533	2.3049	2.24533	2.23964	2.25283	---	---	---	mmu-mir-216a	10374773
13	chr11	+	28663728	28663835	1.78875	2.01387	2.0155	2.09831	1.96584	1.94549	2.1414	1.83167	1.97911	1.9711	---	---	---	mmu-mir-217	10374775
13	chr11	+	28753204	28826743	5.03152	4.95195	4.77666	4.92251	6.81505	6.96078	7.38747	7.12197	4.92066	7.07132	Efemp1	epidermal growth factor-containing fibulin-like extracellular matrix protein 1	NM_146015	NM_146015	10374777
14	chr17	+	65225541	65226332	2.80837	2.87366	3.00132	3.01048	2.72881	3.07963	2.69501	3.02322	2.92346	2.88167	Gm4701	predicted gene 4701	XR_035029	XR_035029	10446397
14	chr17	-	65605340	65890122	2.43184	2.34158	2.32556	2.39529	2.31797	2.37576	2.17633	2.38746	2.37357	2.31438	E130009J12Rik	RIKEN cDNA E130009J12 gene	NM_001008973	NM_001008973	10452450
14	chr17	-	65929393	65962881	8.56101	8.69767	8.54024	8.75204	8.50088	8.5448	8.42116	8.52045	8.63774	8.49682	Vapa	vesicle-associated membrane protein, associated protein A	NM_013933	NM_013933	10452470
14	chr17	-	65986847	65991508	3.18446	3.48692	3.48118	2.88126	3.17273	2.97091	3.00317	3.52318	3.25846	3.1675	Txndc2	thioredoxin domain containing 2 (spermatozoa)	NM_001146002	NM_001146002	10452480
14	chr17	-	66001069	66122021	6.51137	6.46671	6.66525	7.01455	7.34295	7.13231	7.25267	7.22491	6.66447	7.23821	Rab31	RAB31, member RAS oncogene family	NM_133685	NM_133685	10452485
14	chr17	+	66132760	66191203	7.2191	7.15131	7.10437	7.28122	6.90283	7.01429	6.9694	6.99398	7.189	6.97012	Ppp4r1	protein phosphataAE 4, regulatory subunit 1	NM_146081	NM_146081	10446402
14	chr17	-	66197755	66234212	7.40942	7.33694	7.39292	7.46897	7.38477	7.37812	7.31683	7.22064	7.40206	7.32509	Ralbp1	ralA binding protein 1	NM_009067	NM_009067	10452496
14	chr17	-	66271312	66300520	8.45856	8.52041	8.53502	8.61778	8.6461	8.60917	8.67359	8.61071	8.53294	8.63489	Twsg1	twisted gastrulation homolog 1 (Drosophila)	NM_023053	NM_023053	10452508
14	chr17	-	66316841	66426386	4.91658	5.29921	4.9021	4.82192	5.27241	5.2993	5.75236	5.27486	4.98495	5.39973	Ankrd12	ankyrin repeat domain 12	NM_001025572	NM_001025572	10452516
14	chr17	+	66426873	66427308	2.99946	2.80075	2.56851	2.81441	2.75725	2.66232	2.90057	2.76549	2.79578	2.77141	5430411C19Rik	RIKEN cDNA 5430411C19 gene	AK017294	AK017294	10446423
14	chr17	-	66428135	66450849	10.5757	10.7295	10.7638	10.7181	10.5462	10.4809	10.6068	10.653	10.6968	10.5717	Ndufv2	NADH dehydrogenaAE (ubiquinone) flavoprotein 2	NM_028388	NM_028388	10452525
14	chr17	+	66435434	66435540	4.48736	4.53503	4.59006	4.93309	4.06966	4.31629	4.77686	5.19798	4.63638	4.5902	---	---	---	ENSMUST00000083372	10446425
14	chr17	+	66460886	66469843	5.36034	5.45288	5.47061	5.50076	5.32071	5.29216	5.44275	5.49917	5.44615	5.3887	ORF19	open reading frame 19	NM_001037757	NM_001037757	10446427
14	chr17	+	66472860	66501508	3.88548	3.59522	3.67464	3.7664	3.83963	3.81799	3.7082	3.61066	3.73043	3.74412	Ddx11	DEAD/H (Asp-Glu-Ala-Asp/His) box polypeptide 11 (CHL1-like helicaAE homolog, S. cerevisiae)	NM_001003919	NM_001003919	10446441
14	chr17	-	66668413	66668852	3.82339	3.91225	4.06431	3.55987	3.94919	4.06095	4.07391	3.66156	3.83996	3.9364	---	---	---	ENSMUST00000097292	10452535
17	chr1	+	39958015	40081770	7.86154	7.71927	7.79742	8.00326	7.62166	7.62338	7.54716	7.52042	7.84537	7.57816	Map4k4	mitogen-activated protein kinaAE kinaAE kinaAE kinaAE 4	NM_008696	NM_008696	10345715
17	chr1	+	40141613	40182072	2.44328	2.66842	2.72251	2.48515	2.63234	2.57126	2.41959	2.55015	2.57984	2.54333	Il1r2	interleukin 1 receptor, type II	NM_010555	NM_010555	10345752
20	chr1	+	75542846	75555658	8.75517	8.86086	8.74073	8.85643	8.98091	9.08014	8.97621	9.10951	8.8033	9.03669	Slc4a3	solute carrier family 4 (anion exchanger), member 3	NM_009208	NM_009208	10347697
20	chr1	+	75557576	75557935	5.42892	5.72669	5.18533	5.64289	5.67775	5.96864	5.85123	6.08027	5.49596	5.89447	Slc4a3	solute carrier family 4 (anion exchanger), member 3	ENSMUST00000097692	ENSMUST00000097692	10347724
20	chr1	+	75632983	75633754	2.27254	2.17714	2.51108	2.63597	2.55348	2.54446	2.25171	2.66905	2.39918	2.50468	---	---	---	ENSMUST00000121823	10347726
20	chr1	+	77046905	77047444	3.50972	3.88266	3.78732	3.57125	3.77786	3.5547	4.39438	3.86102	3.68774	3.89699	Gm2060	predicted gene 2060	XR_033098	XR_033098	10347728
20	chr1	+	77062542	77063167	3.67677	4.26174	3.33191	3.35857	4.49739	3.65284	3.63551	3.60232	3.65725	3.84701	---	---	---	GENSCAN00000012376	10347730
20	chr1	-	77363760	77511663	7.56558	6.68199	6.50378	6.86749	7.927	7.85164	7.54268	7.76584	6.90471	7.77179	Epha4	Eph receptor A4	NM_007936	NM_007936	10355893
33	chr3	+	82859460	82876214	7.7929	7.79745	8.03636	8.25949	8.02807	7.95906	8.04933	8.02046	7.97155	8.01423	Plrg1	pleiotropic regulator 1, PRL1 homolog (Arabidopsis)	NM_016784	NM_016784	10492757
33	chr3	-	82931484	82932008	2.67891	2.7007	2.46864	2.59905	3.01088	2.83346	2.77556	2.69776	2.61183	2.82942	Gm10710	predicted gene 10710	ENSMUST00000047876	ENSMUST00000047876	10498990
33	chr3	+	82931880	83160389	2.74696	2.4352	2.3465	2.58992	2.44866	2.54029	2.25146	2.45834	2.52964	2.42469	LOC633371	similar to dachsous 2 isoform 2	XR_031743	XR_031743	10492774
33	chr3	+	83570243	83578608	5.50645	5.02561	5.14161	5.10374	5.30132	5.24587	5.59511	5.36757	5.19435	5.37747	Sfrp2	AEcreted frizzled-related protein 2	NM_009144	NM_009144	10492798
43	chr4	+	151307843	151356068	7.38291	7.36609	7.41787	7.54111	7.37083	7.41214	7.40602	7.41134	7.427	7.40008	Dnajc11	DnaJ (Hsp40) homolog, subfamily C, member 11	NM_172704	NM_172704	10510604
43	chr4	-	151356748	151363106	4.83157	4.46764	4.85645	4.67421	4.6406	4.10365	4.69982	4.76814	4.70747	4.55305	Thap3	THAP domain containing, apoptosis associated protein 3	NM_175152	NM_175152	10518841
43	chr4	-	151363740	151370288	4.76199	4.59289	4.74382	4.60389	4.92634	4.86622	4.66472	4.69116	4.67565	4.78711	Phf13	PHD finger protein 13	NM_172705	NM_172705	10518847
43	chr4	+	151383000	151391786	7.61896	7.62146	7.69247	7.68171	7.72471	7.69972	7.60919	7.72013	7.65365	7.68844	Klhl21	kelch-like 21 (Drosophila)	NM_001033352	NM_001033352	10510624
43	chr4	-	151383106	151383729	4.70965	4.66512	4.54359	4.6787	4.82811	4.51667	4.74498	4.77714	4.64926	4.71672	Klhl21	kelch-like 21 (Drosophila)	NM_001033352	NM_001033352	10518855
43	chr4	-	151393883	151401774	3.50261	3.8506	3.68858	3.57	3.66008	3.80233	3.66984	3.66516	3.65295	3.69935	Zbtb48	zinc finger and BTB domain containing 48	NM_133879	NM_133879	10518857
43	chr4	-	151402023	151412677	2.94942	2.71169	2.35222	2.7995	2.7294	2.89253	2.77335	3.02467	2.70321	2.85499	Tas1r1	taste receptor, type 1, member 1	NM_031867	NM_031867	10518869
43	chr4	+	151413443	151435603	6.15086	6.05998	6.1488	6.56389	6.45569	6.52162	6.31614	6.34347	6.23088	6.40923	Nol9	nucleolar protein 9	NM_028727	NM_028727	10510629
43	chr4	+	151437246	151489509	4.83214	5.2219	5.09233	5.33484	5.30911	5.05022	5.09995	5.28953	5.1203	5.1872	Plekhg5	pleckstrin homology domain containing, family G (with RhoGef domain) member 5	NM_001004156	NM_001004156	10510643
43	chr4	+	151490043	151494228	3.52229	3.39199	3.23466	3.62849	3.86705	3.64735	3.48383	3.59903	3.44436	3.64931	Tnfrsf25	tumor necrosis factor receptor superfamily, member 25	NM_033042	NM_033042	10510668
43	chr4	-	151494964	151526316	3.68198	3.62572	3.71897	3.78796	3.95787	3.85571	3.5583	3.88875	3.70366	3.81516	Espn	espin	NM_207687	NM_207687	10518882
43	chr4	+	151532976	151536578	3.43884	3.74327	3.92585	3.66814	3.73719	3.89734	3.90672	3.85805	3.69402	3.84982	Hes2	hairy and enhancer of split 2 (Drosophila)	NM_008236	NM_008236	10510681
43	chr4	+	151552243	151645957	7.99496	7.93073	8.1297	8.10489	8.03301	7.95308	7.96522	7.93879	8.04007	7.97252	Acot7	acyl-CoA thioesteraAE 7	NM_133348	NM_133348	10510687
43	chr4	+	151653115	151659450	5.09261	4.96072	5.01418	5.26426	4.99483	5.14309	5.02264	4.88126	5.08294	5.01045	Gpr153	G protein-coupled receptor 153	NM_178406	NM_178406	10510700
43	chr4	-	151660081	151665771	3.14406	3.23333	3.24286	3.1331	3.37048	3.31583	3.14468	3.39774	3.18834	3.30718	Hes3	hairy and enhancer of split 3 (Drosophila)	NM_008237	NM_008237	10518902
43	chr4	+	151671336	151681231	6.1037	6.09837	5.98901	6.16229	6.01391	6.00634	6.21972	6.23494	6.08834	6.11873	Icmt	isoprenylcysteine carboxyl methyltransferaAE	NM_133788	NM_133788	10510708
43	chr4	-	151681132	151692717	5.95771	5.88448	5.96021	5.9729	5.73935	5.78711	5.81533	5.93522	5.94383	5.81925	Rnf207	ring finger protein 207	NM_001033489	NM_001033489	10518909
43	chr4	+	151699835	151708180	7.77699	7.98864	7.85531	8.04866	7.94171	7.78885	7.99981	7.94104	7.9174	7.91785	Rpl22	ribosomal protein L22	NM_009079	NM_009079	10510720
43	chr4	+	151713071	151764296	4.02221	3.74317	3.69469	3.84272	3.90416	3.89088	3.97534	4.15262	3.8257	3.98075	Chd5	chromodomain helicaAE DNA binding protein 5	NM_001081376	NM_001081376	10510725
43	chr4	-	151764853	151851589	3.55504	3.52633	3.57819	3.20077	3.72601	3.81089	3.43518	3.85813	3.46508	3.70755	Kcnab2	potassium voltage-gated channel, shaker-related subfamily, beta member 2	NM_010598	NM_010598	10518927
43	chr4	+	151852251	151937291	3.31242	3.20414	2.83802	3.49068	3.14242	3.2509	3.23606	3.52014	3.21132	3.28738	Nphp4	nephronophthisis 4 (juvenile) homolog (human)	NM_153424	NM_153424	10510767
43	chr4	+	152071649	152075031	2.9222	2.64305	2.66253	2.67382	3.01026	2.59451	2.70597	2.50203	2.7254	2.70319	Gm833	predicted gene 833	BC147047	BC147047	10510804
43	chr4	-	152756374	152856266	3.02205	3.15732	3.24195	3.44609	3.03443	3.29233	3.23852	2.98376	3.21685	3.13726	Ajap1	adherens junction associated protein 1	NM_001099299	NM_001099299	10518947
59	chr10	-	120847406	120913361	7.90349	7.74814	7.73556	7.72687	7.70887	7.63843	7.74394	7.64544	7.77851	7.68417	Rassf3	Ras association (RalGDS/AF-6) domain family member 3	NM_138956	NM_138956	10372844
59	chr10	-	120983516	121023803	5.75435	5.92558	5.83883	5.83752	5.7421	5.63838	5.70766	5.76856	5.83907	5.71417	Tbk1	TANK-binding kinaAE 1	NM_019786	NM_019786	10372853
59	chr10	-	121026683	121059963	7.07698	6.88679	7.07846	7.08542	7.24163	7.41987	7.05313	6.88224	7.03191	7.14921	Xpot	exportin, tRNA (nuclear export receptor for tRNAs)	NM_001081056	NM_001081056	10372877
59	chr10	+	121078757	121129948	2.36232	2.47742	2.68889	2.7134	2.52359	2.5386	2.47472	2.2698	2.56051	2.45168	D930020B18Rik	RIKEN cDNA D930020B18 gene	NM_177335	NM_177335	10366683
63	chr11	-	86316078	86358276	6.94782	6.88021	6.88162	7.13097	6.9021	6.97389	7.08547	7.00198	6.96015	6.99086	Rps6kb1	ribosomal protein S6 kinaAE, polypeptide 1	NM_001114334	NM_001114334	10389484
63	chr11	+	86358493	86380862	5.05741	5.2025	5.14371	5.31844	5.12922	5.24712	5.07909	5.06604	5.18052	5.13037	Tubd1	tubulin, delta 1	NM_019756	NM_019756	10379968
63	chr11	-	86392792	86393163	3.54015	3.65223	3.80117	3.846	3.67225	4.04026	3.78345	3.73797	3.70989	3.80848	Gm9975	predicted gene 9975	ENSMUST00000069425	ENSMUST00000069425	10389505
63	chr11	-	86397367	86497324	7.85878	7.84143	7.87941	8.15986	7.78109	7.91794	7.77948	7.80799	7.93487	7.82163	Tmem49	transmembrane protein 49	NM_029478	NM_029478	10389507
-	chr17	-	33202045	33204771	2.52266	2.75635	2.50117	2.62916	2.75884	2.44545	2.43262	2.88739	2.60233	2.63108	4921501E09Rik	RIKEN cDNA 4921501E09 gene	NM_001009544	NM_001009544	10449977
-	chr17	+	33226312	33247650	3.85484	4.11831	4.2124	4.16551	3.91376	4.04965	4.15273	3.6907	4.08777	3.95171	Zfp563	zinc finger protein 563	NM_001024950	NM_001024950	10443926
AE1	chr1	+	33965117	34365497	9.38387	9.52757	9.02606	9.33521	9.44422	9.482	9.53251	9.41314	9.31818	9.46797	Dst	dystonin	NM_134448	NM_134448	10345241
AE2	chr3	+	109143601	109488612	4.70043	4.67638	4.61953	4.87827	4.47641	4.60878	4.99634	4.64992	4.71865	4.68286	Vav3	vav 3 oncogene	NM_020505	NM_020505	10495416
AE2	chr3	-	109584027	109946356	2.59738	2.71092	2.61119	2.6083	2.64282	2.56439	2.65251	2.58738	2.63195	2.61177	Ntng1	netrin G1	NM_030699	NM_030699	10501468
AE2	chr3	+	109666698	109666803	1.97447	1.86102	1.79944	2.01252	1.82276	1.89718	1.96228	1.78218	1.91186	1.8661	---	---	---	ENSMUST00000083938	10495447
AE2	chr3	-	109946603	109946929	3.73573	3.48595	3.47047	3.53435	3.36751	3.4408	3.19272	3.51401	3.55663	3.37876	Ntng1	netrin G1	ENSMUST00000051253	ENSMUST00000051253	10501483
AE2	chr3	-	110049027	110053911	3.78093	4.50336	3.95364	4.29486	3.91687	4.10061	3.8669	3.68022	4.1332	3.89115	Prmt6	protein arginine N-methyltransferaAE 6	NM_178891	NM_178891	10501485
AE2	chr3	-	112569727	112649044	3.24989	3.24311	3.10548	3.14897	3.13922	3.24206	3.07203	3.15883	3.18686	3.15303	Hectd1	HECT domain containing 1	NM_144788	NM_144788	10501489
AE3	chr5	-	62993687	63157325	6.27672	6.24014	6.0182	6.20725	5.62599	5.8567	5.90829	5.52599	6.18558	5.72924	Arap2	ArfGAP with RhoGAP domain, ankyrin repeat and PH domain 2	NM_178407	NM_178407	10530100
AE3	chr5	+	63209761	63279491	2.16014	2.15699	2.05362	2.45129	2.34066	2.5272	2.19947	2.45617	2.20551	2.38088	---	---	---	GENSCAN00000035250	10521986
AE3	chr5	+	64040579	64200772	2.89621	2.67022	3.10935	2.94878	3.13971	3.22027	2.87259	3.0817	2.90614	3.07857	3110047P20Rik	RIKEN cDNA 3110047P20 gene	NM_177006	NM_177006	10521995
AE3	chr5	-	64041189	64041503	4.75228	4.31806	4.45028	4.59242	4.78736	4.6293	4.55962	4.3373	4.52826	4.5784	3110047P20Rik	RIKEN cDNA 3110047P20 gene	NM_177006	NM_177006	10530128
AE3	chr5	+	64203603	64290861	5.2024	5.14372	5.16721	5.48081	5.18128	5.05397	4.81929	5.19176	5.24854	5.06157	0610040J01Rik	RIKEN cDNA 0610040J01 gene	BC004797	BC004797	10522004
AE3	chr5	-	64300315	64360115	5.9039	6.09486	5.97741	6.21158	5.39522	5.51546	5.86943	5.68877	6.04694	5.61722	Rell1	RELT-like 1	NM_145923	NM_145923	10530130
AE3	chr5	-	64381627	64382069	6.00919	5.84825	6.08001	6.09905	6.2731	5.77668	6.16968	6.30072	6.00913	6.13005	---	---	---	GENSCAN00000018149	10530140
AE3	chr5	+	64484189	64519417	5.27547	5.19164	5.29715	5.40843	5.13969	5.48334	5.3027	5.06308	5.29317	5.2472	Pgm1	phosphoglucomutaAE 1	NM_025700	NM_025700	10522009
AE3	chr5	+	64550690	64742719	5.14358	5.17487	5.08312	5.29403	5.0045	5.07175	5.09584	4.9662	5.1739	5.03457	Tbc1d1	TBC1 domain family, member 1	NM_019636	NM_019636	10522024
AE3	chr5	-	65158306	65195102	5.17505	5.31849	5.43891	5.31862	5.2273	5.40044	5.49363	5.31862	5.31277	5.36	Klf3	Kruppel-like factor 3 (basic)	NM_008453	NM_008453	10530142
AE4	chr6	+	53237315	53646012	4.58259	4.4839	4.5626	4.73616	4.77232	4.62231	4.51539	4.59288	4.59131	4.62573	Creb5	cAMP responsive element binding protein 5	NM_172728	NM_172728	10538338
AE4	chr6	+	53383968	53384131	5.67943	5.21436	5.59981	5.60912	6.15766	5.73609	5.36512	6.02312	5.52568	5.8205	---	---	---	ENSMUST00000083282	10538352
AE4	chr6	+	53765460	53770688	2.84145	2.82439	2.87834	2.58002	2.65658	2.80604	2.79616	2.95059	2.78105	2.80234	1200009O22Rik	RIKEN cDNA 1200009O22 gene	BC043099	BC043099	10538354
AE4	chr6	-	53765462	53770688	4.12461	4.39053	4.08665	4.5691	4.50055	4.69467	4.60964	4.67058	4.29272	4.61886	1200009O22Rik	RIKEN cDNA 1200009O22 gene	BC043099	BC043099	10544837
AE4	chr6	-	53823273	53928667	2.0911	2.46973	2.12357	2.21798	2.25412	2.19582	2.10982	2.21007	2.22559	2.19246	Cpvl	carboxypeptidaAE, vitellogenic-like	NM_027749	NM_027749	10544841
AE4	chr6	+	53990111	54251804	3.58574	3.5515	3.75542	3.82836	3.67358	3.66426	3.99761	3.78765	3.68026	3.78077	Chn2	chimerin (chimaerin) 2	NM_023543	NM_023543	10538356
AE4	chr6	-	54219675	54380215	3.21158	2.48836	2.67643	2.47382	2.8412	2.73592	2.33846	2.95676	2.71255	2.71809	Chn2	chimerin (chimaerin) 2	NM_023543	NM_023543	10544858
AE5	chr9	+	90246833	90247009	4.21236	5.07066	5.08221	4.14378	4.17997	4.11536	5.26252	4.77828	4.62725	4.58403	---	---	---	ENSMUST00000083947	10587778
AE5	chr9	+	90991986	90993338	10.2818	10.2927	10.324	10.3926	10.345	10.3853	10.2516	10.2381	10.3228	10.305	Tuba1b	tubulin, alpha 1B	NM_011654	NM_011654	10587780
AE5	chr9	-	91255183	91260637	2.60087	2.44575	2.80978	2.52774	2.62655	2.67878	2.63562	2.60822	2.59603	2.63729	Zic1	zinc finger protein of the cerebellum 1	NM_009573	NM_009573	10595695
AE5	chr9	+	91263810	91284186	2.60831	2.4717	2.82031	2.61782	2.56836	2.71353	2.60888	2.58917	2.62954	2.61998	Zic4	zinc finger protein of the cerebellum 4	NM_009576	NM_009576	10587782
AE5	chr9	+	92145086	92167116	6.7252	7.10644	6.91397	7.31201	6.6986	6.96601	6.92084	6.81593	7.01441	6.85034	Plscr1	phospholipid scramblaAE 1	NM_011636	NM_011636	10587792
AE5	chr9	+	92170558	92192573	5.32152	5.91977	5.60787	5.87862	5.73426	5.79851	6.20362	6.03883	5.68195	5.94381	Plscr2	phospholipid scramblaAE 2	NM_008880	NM_008880	10587799
AE5	chr9	+	92204215	92252714	2.12534	2.36512	2.33304	2.67774	2.15813	2.19007	2.15434	2.43167	2.37531	2.23355	1700057G04Rik	RIKEN cDNA 1700057G04 gene	BC147543	BC147543	10587810
AE5	chr9	+	92352216	92387354	5.83984	5.91302	5.59435	5.90143	5.89039	6.01687	6.24263	6.02352	5.81216	6.04335	Plscr4	phospholipid scramblaAE 4	NM_178711	NM_178711	10587818
AE6	chr10	-	113836079	114238420	2.48501	2.57683	2.56297	2.63675	2.64384	2.49702	2.57889	2.56196	2.56539	2.57043	Trhde	TRH-degrading enzyme	NM_146241	NM_146241	10372421
AE7	chr11	-	107799481	108205242	6.11838	5.83411	5.89945	6.20977	6.15439	6.22044	6.30445	6.27078	6.01543	6.23751	Prkca	protein kinaAE C, alpha	NM_011101	NM_011101	10392388
AE7	chr11	-	107830762	107831193	3.24258	3.00554	3.16136	3.08474	3.17907	3.06927	2.88253	2.95994	3.12356	3.0227	Gm10838	predicted gene 10838	ENSMUST00000100300	ENSMUST00000100300	10392410
AE7	chr11	+	108256605	108275710	2.46947	2.39285	2.31922	2.43323	2.49227	2.30321	2.34926	2.32924	2.40369	2.3685	Apoh	apolipoprotein H	NM_013475	NM_013475	10382189
AE7	chr11	+	108284587	108285129	2.76712	2.57568	2.87779	2.81205	2.91019	2.54791	2.72072	2.73217	2.75816	2.72775	---	---	---	ENSMUST00000119828	10382198
AE7	chr11	+	108295448	108721929	3.6901	3.44857	3.73181	3.79926	2.93183	3.23706	3.22547	3.03311	3.66743	3.10687	Ccdc46	coiled-coil domain containing 46	NM_029606	NM_029606	10382200
AE7	chr11	+	108781680	108812097	3.68997	3.78201	3.76425	3.82873	3.46635	3.61392	3.64987	4.04138	3.76624	3.69288	Axin2	axin2	NM_015732	NM_015732	10382228
AE8	chr11	+	110927478	110936965	7.0996	7.75914	7.5997	7.61897	7.29787	7.47591	7.53817	7.53348	7.51935	7.46136	Kcnj2	potassium inwardly-rectifying channel, subfamily J, member 2	NM_008425	NM_008425	10382321
AE8	chr11	+	111137414	111138245	3.0204	3.10922	2.914	3.09832	3.11902	3.05564	2.84615	2.89096	3.03549	2.97795	---	---	---	ENSMUST00000121873	10382326
AE8	chr11	-	112525239	112525989	2.12902	1.90642	2.00436	2.12902	2.41766	2.45225	2.02081	2.0821	2.0422	2.24321	BC006965	cDNA AEquence BC006965	NR_024085	NR_024085	10392685
AE8	chr11	-	112525241	112572670	2.16549	2.27023	2.26227	2.16329	2.35921	2.35817	2.10437	2.29834	2.21532	2.28002	BC006965	cDNA AEquence BC006965	NR_024085	NR_024085	10392687
AE8	chr11	+	112643538	112649063	4.79487	4.77908	4.83237	4.82969	4.78049	5.0058	4.81366	4.64834	4.809	4.81207	Sox9	SRY-box containing gene 9	NM_011448	NM_011448	10382328
AE9	chr14	-	22665083	22668132	4.17045	4.25432	3.96048	4.05368	4.01274	3.99776	4.00256	4.23231	4.10973	4.06134	Comtd1	catechol-O-methyltransferaAE domain containing 1	NM_026965	NM_026965	10418027
AE9	chr14	+	22667669	22676148	2.36153	2.40984	2.20508	2.74085	2.43899	2.68436	2.74325	2.48508	2.42932	2.58792	A430057M04Rik	RIKEN cDNA A430057M04 gene	AK079754	AK079754	10413148
AE9	chr14	-	22803184	22808823	3.46558	3.54658	3.37161	3.59452	3.64315	3.41504	3.23124	3.52725	3.49457	3.45417	Zfp503	zinc finger protein 503	NM_145459	NM_145459	10418038
AE9	chr14	+	22839101	23875256	2.85475	2.69393	2.42626	3.37593	2.47327	2.70756	2.83737	2.74016	2.83772	2.68959	1700112E06Rik	RIKEN cDNA 1700112E06 gene	NM_028275	NM_028275	10413152
AE10	chr15	+	43640031	43640473	2.56014	2.37306	2.30819	2.84366	2.51202	2.47668	2.52389	2.5484	2.52126	2.51525	---	---	---	GENSCAN00000032480	10423951
AE10	chr15	-	43696193	43701575	2.29674	2.35567	2.32242	2.37157	2.18658	2.47628	2.30923	2.33457	2.3366	2.32666	Tmem74	transmembrane protein 74	NM_175502	NM_175502	10428407
AE10	chr15	+	44027779	44067458	2.11665	1.88038	1.98133	2.08114	1.89985	1.8871	1.81959	1.82478	2.01488	1.85783	Trhr	thyrotropin releasing hormone receptor	NM_013696	NM_013696	10423953
AE10	chr15	-	44206775	44259853	5.36865	5.24625	5.1563	5.27811	5.32449	5.1701	5.39449	5.0391	5.26233	5.23205	Nudcd1	NudC domain containing 1	NM_026149	NM_026149	10428412
AE10	chr15	+	44259647	44269231	7.35532	7.24681	6.98715	7.3886	7.30327	7.27487	7.43629	7.32326	7.24447	7.33442	Eny2	enhancer of yellow 2 homolog (Drosophila)	NM_175009	NM_175009	10423963
AE10	chr15	+	44289099	44428689	3.37867	3.12221	3.14839	3.49923	3.59163	3.54015	3.55041	3.39927	3.28713	3.52036	Pkhd1l1	polycystic kidney and hepatic diAEaAE 1-like 1	NM_138674	NM_138674	10423971
AE10	chr15	+	44450859	44472573	5.40699	5.70386	5.46755	5.71855	5.68701	5.55502	5.61106	5.53178	5.57424	5.59622	Ebag9	estrogen receptor-binding fragment-associated gene 9	NM_019480	NM_019480	10424050
AE10	chr15	-	44503402	44619609	5.01608	4.84842	4.8578	4.94128	4.74697	4.74616	4.77477	4.91728	4.91589	4.79629	5730410E15Rik	RIKEN cDNA 5730410E15 gene	NM_176998	NM_176998	10428426
AE10	chr15	-	44576244	44576562	1.94152	1.86818	1.94764	2.18041	1.93919	1.88952	1.99787	1.85294	1.98444	1.91988	---	---	---	ENSMUST00000066900	10428439
AE10	chr15	+	44712926	44714601	2.24513	2.23532	2.26928	2.43846	2.15514	2.40229	2.0496	2.34703	2.29705	2.23851	A930017M01Rik	RIKEN cDNA A930017M01 gene	AK080719	AK080719	10424060
AE10	chr15	+	44715020	44715856	2.92749	2.61509	2.71096	3.0603	2.71388	2.91923	2.71218	2.91183	2.82846	2.81428	A930017M01Rik	RIKEN cDNA A930017M01 gene	AK080719	AK080719	10424062
AE10	chr15	-	44803340	44803681	7.5804	7.6279	7.56592	7.42199	7.48838	7.54198	7.5865	7.48597	7.54905	7.52571	---	---	---	ENSMUST00000072732	10428441
AE10	chr15	-	44937830	44946373	2.53109	2.67807	2.48136	2.70553	3.06016	2.74914	2.62408	2.58304	2.59901	2.75411	Kcnv1	potassium channel, subfamily V, member 1	NM_026200	NM_026200	10428443
AE11	chr18	+	68092911	68415205	5.9672	5.77264	5.95636	6.15705	5.68025	5.87353	6.09236	5.6901	5.96331	5.83406	D18Ertd653e	DNA AEgment, Chr 18, ERATO Doi 653, expresAEd	BC096371	BC096371	10456492
